# Supplementary material for: Secular trends of epidemiologic patterns of chronic kidney disease over three decades: an updated analysis of the Global Burden of Disease Study 2019
Source: PubMed Central journal article supplement — BMJ Open. 2023 Mar 17;13(3):e064540. doi: 10.1136/bmjopen-2022-064540 (PMC10030786; doi:10.1136/bmjopen-2022-064540), 2023-03-17
Supplement: bmjopen-2022-064540.draft_revisions.pdf [file bmjopen-2022-064540.draft_revisions.pdf]

# BMJ Open

BMJ Open is committed to open peer review. As part of this commitment we make the peer review history of every article we publish publicly available.

When an article is published we post the peer reviewers' comments and the authors' responses online. We also post the versions of the paper that were used during peer review. These are the versions that the peer review comments apply to.

The versions of the paper that follow are the versions that were submitted during the peer review process. They are not the versions of record or the final published versions. They should not be cited or distributed as the published version of this manuscript.

BMJ Open is an open access journal and the full, final, typeset and author-corrected version of record of the manuscript is available on our site with no access controls, subscription charges or pay-per-view fees (<http://bmjopen.bmj.com>).

If you have any questions on BMJ Open's open peer review process please email [info.bmjopen@bmj.com](mailto:info.bmjopen@bmj.com)

# BMJ Open

## Global Death Burden of Chronic Kidney Disease from 1990 to 2019

|                               |                                                                                                                                                                                                                                                                                                                                                                                                                                                                                                                                                                                                                                                                                                                                                                                                                                                                                                                                                                                                                                                                                                                                                               |
|-------------------------------|---------------------------------------------------------------------------------------------------------------------------------------------------------------------------------------------------------------------------------------------------------------------------------------------------------------------------------------------------------------------------------------------------------------------------------------------------------------------------------------------------------------------------------------------------------------------------------------------------------------------------------------------------------------------------------------------------------------------------------------------------------------------------------------------------------------------------------------------------------------------------------------------------------------------------------------------------------------------------------------------------------------------------------------------------------------------------------------------------------------------------------------------------------------|
| Journal:                      | <i>BMJ Open</i>                                                                                                                                                                                                                                                                                                                                                                                                                                                                                                                                                                                                                                                                                                                                                                                                                                                                                                                                                                                                                                                                                                                                               |
| Manuscript ID                 | bmjopen-2022-064540                                                                                                                                                                                                                                                                                                                                                                                                                                                                                                                                                                                                                                                                                                                                                                                                                                                                                                                                                                                                                                                                                                                                           |
| Article Type:                 | Original research                                                                                                                                                                                                                                                                                                                                                                                                                                                                                                                                                                                                                                                                                                                                                                                                                                                                                                                                                                                                                                                                                                                                             |
| Date Submitted by the Author: | 07-May-2022                                                                                                                                                                                                                                                                                                                                                                                                                                                                                                                                                                                                                                                                                                                                                                                                                                                                                                                                                                                                                                                                                                                                                   |
| Complete List of Authors:     | Chen, Zhenna; Affiliated Hospital of Weifang Medical University, Department of Ophthalmology<br>Hou, Ningning; Affiliated Hospital of Weifang Medical University, Department of Endocrinology and Metabolism<br>Liu, Jing; The Second Affiliated Hospital of Shaanxi University of Chinese Medicine, Department of Cardiovascular Medicine<br>Li, Xue; Affiliated Hospital of Weifang Medical University, Department of Clinical Research Center; Affiliated Hospital of Weifang Medical University, Department of Pathology<br>Feng, Xiaojin; Affiliated Hospital of Weifang Medical University, Department of Endocrinology and Metabolism; Affiliated Hospital of Weifang Medical University, Department of Clinical Research Center<br>Sun, Xiaodong; Affiliated Hospital of Weifang Medical University, Department of Endocrinology and Metabolism; Affiliated Hospital of Weifang Medical University, Department of Clinical Research Center<br>Liu, Yongping; Affiliated Hospital of Weifang Medical University, Department of Endocrinology and Metabolism; Affiliated Hospital of Weifang Medical University, Department of Clinical Research Center |
| Keywords:                     | PUBLIC HEALTH, EPIDEMIOLOGY, Chronic renal failure < NEPHROLOGY                                                                                                                                                                                                                                                                                                                                                                                                                                                                                                                                                                                                                                                                                                                                                                                                                                                                                                                                                                                                                                                                                               |
|                               |                                                                                                                                                                                                                                                                                                                                                                                                                                                                                                                                                                                                                                                                                                                                                                                                                                                                                                                                                                                                                                                                                                                                                               |

SCHOLARONE™  
Manuscripts

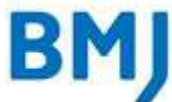

I, the Submitting Author has the right to grant and does grant on behalf of all authors of the Work (as defined in the below author licence), an exclusive licence and/or a non-exclusive licence for contributions from authors who are: i) UK Crown employees; ii) where BMJ has agreed a CC-BY licence shall apply, and/or iii) in accordance with the terms applicable for US Federal Government officers or employees acting as part of their official duties; on a worldwide, perpetual, irrevocable, royalty-free basis to BMJ Publishing Group Ltd ("BMJ") its licensees and where the relevant Journal is co-owned by BMJ to the co-owners of the Journal, to publish the Work in this journal and any other BMJ products and to exploit all rights, as set out in our [licence](#).

The Submitting Author accepts and understands that any supply made under these terms is made by BMJ to the Submitting Author unless you are acting as an employee on behalf of your employer or a postgraduate student of an affiliated institution which is paying any applicable article publishing charge ("APC") for Open Access articles. Where the Submitting Author wishes to make the Work available on an Open Access basis (and intends to pay the relevant APC), the terms of reuse of such Open Access shall be governed by a Creative Commons licence – details of these licences and which [Creative Commons](#) licence will apply to this Work are set out in our licence referred to above.

Other than as permitted in any relevant BMJ Author's Self Archiving Policies, I confirm this Work has not been accepted for publication elsewhere, is not being considered for publication elsewhere and does not duplicate material already published. I confirm all authors consent to publication of this Work and authorise the granting of this licence.

# Global Death Burden of Chronic Kidney Disease from 1990 to 2019

1 **Zhenna Chen<sup>1†</sup>, Ningning Hou<sup>2†</sup>, Jing Liu<sup>3</sup>, Xue Li<sup>4,5</sup>, Xiaojin Feng<sup>2,4</sup>, Xiaodong  
2 Sun<sup>2,4\*</sup>, and Yongping Liu<sup>2,4\*</sup>**

3 <sup>1</sup>Department of Ophthalmology, Affiliated Hospital of Weifang Medical University,  
4 Weifang, China

5 <sup>2</sup>Department of Endocrinology and Metabolism, Affiliated Hospital of Weifang  
6 Medical University, Weifang, China

7 <sup>3</sup>Department of Cardiovascular Medicine, The Second Affiliated Hospital of Shaanxi  
8 University of Chinese Medicine, Xianyang, China

9 <sup>4</sup>Department of Clinical Research Center, Affiliated Hospital of Weifang Medical  
10 University, Weifang, China

11 <sup>5</sup>Department of Pathology, Affiliated Hospital of Weifang Medical University,  
12 Weifang, China

13 †These authors have contributed equally to this work and share first authorship

14 **\* Correspondence:**

15 Yongping Liu, M.D., Ph.D., Department of Endocrinology and Metabolism,  
16 Affiliated Hospital of Weifang Medical University, No. 2428 Yuhe Road, Weifang,  
17 Shandong, 261000, China. Email: lypfree@hotmail.com

18 Xiaodong Sun, M.D., Ph.D., Department of Endocrinology and Metabolism,  
19 Affiliated Hospital of Weifang Medical University, No. 2428 Yuhe Road, Weifang,  
20 Shandong, 261000, China. Email: xiaodong.sun@wfmc.edu.cn

21 Word count: 3639

22 **Keywords: Chronic kidney disease, global burden of disease, death, aging, risk  
23 factors**

24



1  
2  
3 25 **Abstract**

4 26 **Objectives:** To assess the characteristics of the global death burden imposed by CKD  
5 27 and the attributable risk factors from 1990 to 2019 to provide a framework for policy  
6 28 discussions, resource allocation and research priorities.

7 29 **Design:** A population-based observational study.

8 30 **Setting:** The death data and relative risk factors were obtained from the Global  
9 31 Burden of Disease Study 2019 database.

10 32 **Main outcome measures:** We estimated the death burden attributable to CKD  
11 33 stratified by sociodemographic index (SDI), geographic location, sex, age group, time  
12 34 period and risk factors from 1990 to 2019.

13 35 **Results:** Over 3-decade study period, the global number of CKD-related deaths  
14 36 increased from 0.60 million in 1990 to 1.43 million in 2019. The age-standardized  
15 37 death rate (ASDR) of CKD, among all causes, increased from 15th in 1990 to 10th in  
16 38 2019. Globally, the ASDR in males was higher than that in females. CKD-related  
17 39 deaths mainly occurred in those aged over 50 years, especially in regions with higher  
18 40 SDIs. The ASDR was negatively related to SDI. Among risk factors, metabolic risk  
19 41 factors, especially systolic blood pressure (SBP), fasting plasma glucose (FPG) and  
20 42 body mass index (BMI), were the main contributors to CKD-related deaths. Although  
21 43 the high-temperature-related death burden was low, the trend increased sharply in  
22 44 lower SDI regions.

23 45 **Conclusions:** Public awareness of CKD prevention measures is insufficient, and  
24 46 CKD remains a global public health concern. CKD-related deaths continue to  
25 47 increase, with the majority occurring in elderly adults. The CKD-related death burden  
26 48 is higher in men than in women. Additionally, the increasing high-temperature-related  
27 49 death burdens in lower SDI regions should receive social attention.

28 50  
29  
30  
31  
32  
33  
34  
35  
36  
37  
38  
39  
40  
41  
42  
43  
44  
45  
46  
47  
48  
49  
50  
51  
52  
53  
54  
55  
56  
57  
58  
59  
60

1  
2  
3 51 **Strengths and limitations of this study**  
4

- 5 52 ➤ This study will provide a framework for policy discussions, resource allocation and research  
6 53 priorities.  
7 54 ➤ In some countries with large territory spans or with multinational populations, the impact of  
8 55 regional and ethnic differences within countries on the global burden of CKD could not be  
9 56 further analyzed.  
10 57 ➤ The CKD burden may be underestimated in less developed countries and areas due to limited  
11 58 access to health care.  
12 59 ➤ Data on the impact of metabolic factors other than blood pressure and blood glucose, such as  
13 60 triglycerides, cholesterol or uric acid, on the global burden of CKD are lacking.  
14  
15  
16  
17  
18  
19  
20  
21  
22  
23  
24  
25  
26  
27  
28  
29  
30  
31  
32  
33  
34  
35  
36  
37  
38  
39  
40  
41  
42  
43  
44  
45  
46  
47  
48  
49  
50  
51  
52  
53  
54  
55  
56  
57  
58  
59  
60  
61

## 62 INTRODUCTION

63 Chronic kidney disease (CKD) refers to chronic renal dysfunction caused by various  
64 factors for more than 3 months.<sup>1</sup> According to relevant statistics, there were 697.5  
65 million cases of CKD worldwide in 2017.<sup>1</sup> The prevalence of CKD has increased with  
66 the aging of the population and has become a global public health problem.<sup>2</sup> The  
67 incidence rate increased by 29.3% compared with that in 1990<sup>1</sup>. Once diagnosed with  
68 CKD, the kidney function would gradually decline until the end-stage renal disease or  
69 even death, with little chance of reversal, imposing a heavy economic burden on  
70 society.

71 Studies have found that the sociodemographic index (SDI), human development level,  
72 economic situation, and health access and quality index are closely related to the CKD  
73 incidence.<sup>3-6</sup> Complex influencing factors make the diagnosis and treatment of CKD  
74 difficult, which seriously increases the public health burden.<sup>7,8</sup> Although several  
75 studies on CKD have been conducted,<sup>1,9</sup> detailed death burden analyses of recent 3-  
76 decade period are scarce and need to be further studied.

77 In the context of current global Big Data, deep quantitative analyses of CKD  
78 morbidity and mortality and their influencing factors are crucial in guiding decisions  
79 by policymakers and health care providers. However, the details of CKD-related  
80 mortality have been poorly studied worldwide. Considering these factors, we carried  
81 out research on the global CKD-related death burden and related risk factors from  
82 1990-2019. We also analyzed the numbers of deaths caused by CKD and the age-  
83 standardized death rates (ASDRs) by time period, region, age, risk factors and sex.

## 85 MATERIALS AND METHODS

### 86 Study data

87 Data analyzed in the present study were obtained from the Global Health Data  
88 Exchange (GHDx). The database provides epidemiological data about 369 diseases  
89 and 87 attributable risk factors in 204 countries and territories from January 1, 1990 to  
90 December 31, 2019, disaggregated by time, location and sex, and is constantly  
91 updated by ongoing multinational cooperative organizations.<sup>10,11</sup> Detailed research  
92 methods followed the Global Burden of Disease study (GBD) 2019.<sup>10,11</sup> The SDI,  
93 based on fertility, income per capita and educational attainment, was used as a  
94 composite indicator of the degree of health-related development at the national or  
95 regional level. The SDI value ranges from 0 to 1, and all the countries were classified  
96 into five SDI regions: low-, low-middle-, middle-, high-middle- and high-SDI  
97 regions, according to the SDI quartiles. Regions with a lower value indicating a lower  
98 degree of development associated with health outcomes. In addition, countries were  
99 divided into 21 regions according to geographical location. Age-standardized rates  
100 (ASRs) based on the updated standard population were also available in the GBD  
101 2019, allowing the analysis of CKD according to age structure and population size.

### 102 Statistical analysis

103 Numbers and ASDRs, and associated 95% uncertainty intervals (UIs) were analyzed

1  
2  
3 104 to quantify the CKD-related death burden attributed to risk factors. Ninety-five  
4 105 percent UI values fell between the 25th and 975th values of 1000 samples that were  
5 106 extracted from the posterior distribution in the modeling process.<sup>12</sup> The time trend of  
6 107 an ASR over a specified time period were represented by the estimated annual  
7 108 percentage change (EAPC), which detailed calculation method has been reported in  
8 109 many previously published GBD studies.<sup>13 14</sup> In brief, the natural logarithm of the  
9 110 ASR is assumed to be linear over time; therefore,  $\ln(\text{ASR}) = \alpha + \beta \times (\text{calendar year}) +$   
10 111 error term. The  $\text{EAPC} = 100 \times (\exp(\beta) - 1)$ , and the 95% confidence interval (95% CI)  
11 112 can be obtained from the linear regression model. To assess the trends of data over  
12 113 time from 1990 to 2019, Joinpoint trend analyses were performed by fitting several  
13 114 different line segments on a logarithmic scale with the simplest model. Significant  
14 115 changes were identified by permutation tests and estimated by the Monte Carlo  
15 116 method. A *P* value less than 0.05 was used to denote to be statistical significance.  
16 117 All statistical and graphical analyses were carried out using R version 4.1.2 (Vienna,  
17 118 Austria), Joinpoint software version 4.9.0.1 (National Cancer Institute, USA) and  
18 119 GraphPad Prism 8 (California, USA).

#### 120 **Patient and Public Involvement**

121 Patients or the public were not involved in this study.

### 122 123 **RESULTS**

#### 124 **1. Global burden of chronic kidney disease**

125 Globally, there were 697.29 million CKD cases and 18.99 million incident cases in  
126 2019, both of which were more than twice those in 1990 (supplementary table 1,  
127 supplementary table 2, supplementary figure 1a and supplementary figure 1b). The  
128 number of deaths caused by CKD doubled from 0.60 million (95% UI: 0.57-0.63  
129 million) in 1990 to 1.43 million (95% UI: 1.31-1.52 million) in 2019 (table 1; figure  
130 1a). Among all the causes of death, the percentage of deaths due to CKD doubled  
131 from 1.29% to 2.53%. The numbers of deaths caused by CKD increased from 19th in  
132 1990 to 11th in 2019 (supplementary figure 2a), and the ASDR increased from 15th to  
133 10th (supplementary figure 2b). Global DALYs also doubled from 21.50 million in  
134 1990 to 41.54 million in 2019 (supplementary table 3 and supplementary figure 1c).  
135 During this period, the age-standardized incidence rate (ASIR) increased over time,  
136 with an EAPC of 3.15 (95% CI: 3.11 to 3.19) (supplementary table 2, supplementary  
137 figure 3). The ASDR, DALYs, YLLs and YLDs showed upward trends in the first  
138 half of the study period but downward trends in the latter years according to the  
139 Joinpoint analyses (figure 1b right, supplementary figure 3). These trends were  
140 consistent in both the male and female (supplementary figure 3).

141  
142 **Table 1.** Death cases and age-standardized death rates of chronic kidney disease in 1990 and 2019,  
143 and the temporal trends from 1990 to 2019.

| Characteristics           | 1990                                      |                                         | 2019                                      |                                            | 1990-2019                |
|---------------------------|-------------------------------------------|-----------------------------------------|-------------------------------------------|--------------------------------------------|--------------------------|
|                           | Death cases ( $\times 10^3$ )<br>(95% UI) | ASDR per 100,000<br>population (95% UI) | Death cases ( $\times 10^3$ )<br>(95% UI) | ASDR per 100,000<br>population (95%<br>UI) | EAPC of ASDR<br>(95% CI) |
| Global                    | 601.31 (567.6-633.79)                     | 16.14 (15.13-17.13)                     | 1427.23 (1313.73-1524.55)                 | 18.29 (16.72-19.55)                        | 0.55 (0.46 to 0.64)      |
| <b>Gender</b>             |                                           |                                         |                                           |                                            |                          |
| Males                     | 313.94 (293.38-338.57)                    | 19.55 (18.19-21.18)                     | 741.38 (685.84-801.7)                     | 21.59 (19.93-23.27)                        | 0.55 (0.46 to 0.64)      |
| Females                   | 287.37 (268.8-305.44)                     | 13.89 (12.91-14.79)                     | 685.85 (614.92-741.57)                    | 15.8 (14.17-17.09)                         | 0.55 (0.46 to 0.64)      |
| <b>SDI regions</b>        |                                           |                                         |                                           |                                            |                          |
| Low                       | 62.02 (55.89-68.54)                       | 27.21 (24.08-30.65)                     | 125.07 (112.78-137.96)                    | 25.28 (22.9-27.68)                         | -0.27 (-0.31 to -0.22)   |
| Low-middle                | 126.51 (114.96-138.84)                    | 21.9 (19.73-24.25)                      | 293.49 (265.9-320.13)                     | 22.95 (20.77-25.04)                        | 0.14 (0.01 to 0.26)      |
| Middle                    | 196.59 (183.72-209.89)                    | 21.01 (19.54-22.84)                     | 506.13 (464.49-547.47)                    | 22.8 (20.79-24.75)                         | 0.43 (0.36 to 0.5)       |
| High-middle               | 116.33 (109.59-124.18)                    | 12.25 (11.42-13.2)                      | 227.99 (207.02-244.66)                    | 11.78 (10.65-12.65)                        | -0.08 (-0.22 to 0.06)    |
| High                      | 99.47 (92.56-103.08)                      | 9.61 (8.92-9.98)                        | 273.59 (236.92-294.76)                    | 12.58 (11.09-13.47)                        | 1.21 (1.09 to 1.32)      |
| <b>21 GBD regions</b>     |                                           |                                         |                                           |                                            |                          |
| Central Asia              | 5.04 (4.73-5.75)                          | 10.01 (9.33-11.63)                      | 10.38 (9.43-11.49)                        | 14.75 (13.48-16.17)                        | 1.11 (0.73 to 1.49)      |
| Central Europe            | 13.14 (12.7-13.56)                        | 9.62 (9.22-9.93)                        | 18.76 (16.33-21.22)                       | 8.61 (7.5-9.74)                            | -0.23 (-0.36 to -0.11)   |
| Eastern Europe            | 11.06 (10.74-11.35)                       | 4.41 (4.25-4.53)                        | 15.93 (14.23-17.56)                       | 4.85 (4.34-5.34)                           | -0.16 (-0.42 to 0.09)    |
| Australasia               | 2.02 (1.85-2.14)                          | 9.27 (8.39-9.87)                        | 6.12 (5.14-6.85)                          | 10.77 (9.17-12)                            | 0.7 (0.62 to 0.78)       |
| High-income Asia Pacific  | 22.94 (21.27-23.86)                       | 13.12 (12.01-13.73)                     | 54.14 (42.82-60.58)                       | 9.13 (7.54-10.06)                          | -1.35 (-1.43 to -1.28)   |
| High-income North America | 35.75 (32.89-37.2)                        | 9.79 (9.03-10.18)                       | 114.46 (102.38-122.48)                    | 16.88 (15.26-17.98)                        | 2.26 (2.07 to 2.45)      |
| Southern Latin America    | 8.99 (8.51-9.42)                          | 20.79 (19.61-21.83)                     | 21.69 (19.81-23.33)                       | 25.45 (23.27-27.34)                        | 0.72 (0.43 to 1.02)      |
| Western Europe            | 49.78 (46.2-51.89)                        | 8.49 (7.86-8.87)                        | 116.66 (99.12-126.16)                     | 9.97 (8.58-10.73)                          | 0.98 (0.86 to 1.1)       |

|                              |                                    |                     |                        |                     |                        |
|------------------------------|------------------------------------|---------------------|------------------------|---------------------|------------------------|
| Andean Latin America         | 5.24 (4.78-5.74)                   | 25.51 (23.13-28.1)  | 19.38 (16.14-22.96)    | 35.68 (29.73-42.21) | 1.37 (1.07 to 1.67)    |
| Caribbean                    | 4.79 (4.47-5.28)                   | 18.59 (17.28-20.52) | 12.66 (10.85-14.78)    | 24.58 (21.08-28.71) | 1.44 (1.31 to 1.58)    |
| Central Latin America        | 20.7 (19.77-21.36)                 | 25.77 (24.22-26.76) | 111.71 (98.57-125.86)  | 48.11 (42.52-54.16) | 2.42 (2.09 to 2.74)    |
| Tropical Latin America       | 16.59 (15.87-17.14)                | 19.36 (18.16-20.14) | 44.22 (40.46-46.73)    | 18.96 (17.25-20.06) | 0.01 (-0.06 to 0.09)   |
| North Africa and Middle East | 52.6 (47.64-61.84)                 | 34.74 (30.67-44.08) | 111.81 (96.42-130.85)  | 30.37 (26.34-35.39) | -0.43 (-0.51 to -0.34) |
| South Asia                   | 117.5 (100.02-134.35)              | 22.21 (18.57-25.75) | 285.34 (248.21-324.6)  | 21.56 (18.82-24.36) | -0.3 (-0.51 to -0.08)  |
| East Asia                    | 104.32 (92.79-116.88)              | 13.28 (11.9-14.75)  | 209.29 (179.98-237.7)  | 11.55 (9.99-13.05)  | -0.21 (-0.32 to -0.1)  |
| Oceania                      | 0.62 (0.53-0.72)                   | 20.82 (18.22-23.98) | 1.6 (1.32-1.93)        | 23.8 (20.26-27.96)  | 0.31 (0.12 to 0.49)    |
| Southeast Asia               | 68.7 (63.3-74.86)                  | 27.38 (24.96-30.14) | 153.37 (137.32-169.64) | 27.79 (24.63-30.68) | 0.06 (0 to 0.12)       |
| Central Africa               | Sub-Saharan<br>6.45 (5.47-7.54)    | 30.32 (25.81-34.98) | 12.36 (9.7-15.19)      | 25.87 (19.78-31.73) | -0.64 (-0.68 to -0.61) |
| Eastern Africa               | Sub-Saharan<br>21.64 (19.01-24.17) | 29.43 (25.56-33.33) | 38.6 (34.23-43.26)     | 26.24 (23.43-29.23) | -0.5 (-0.55 to -0.46)  |
| Southern Africa              | Sub-Saharan<br>6.18 (5.58-7.05)    | 23.04 (20.68-26.41) | 16.27 (14.95-17.65)    | 32.44 (29.77-35.1)  | 1.31 (0.95 to 1.66)    |
| Western Africa               | Sub-Saharan<br>27.27 (23.36-32.18) | 31.88 (27.56-37.76) | 52.47 (44.11-61.28)    | 29.35 (25.21-33.71) | -0.21 (-0.25 to -0.17) |

145 SDI: sociodemographic index; ASDR: age-standardized death rate; EAPC: estimated annual  
146 percentage change; UI: uncertainty interval; CI: confidence interval.

147  
148 Of the total DALYs, which is consisted of years of life lost prematurely (YLLs) and  
149 years lived with disability (YLDs), YLLs accounted for 78.94%, while YLDs  
150 accounted for 21.06% in 2019. As the overall death burden was mainly attributed to  
151 disease-related deaths, we focused subsequent analyses mainly on the CKD-related  
152 death burden. During the three decades, all five SDI regions showed increases in the  
153 numbers of deaths over time (figure 1b left). Among them, the middle-SDI region  
154 showed the highest death numbers, reaching 0.51 million, and the low-SDI region had  
155 the lowest, with 0.13 million, in 2019 (figure 1a and 1b left). The ASDR in the high-  
156 SDI region increased dramatically, with an EAPC of 1.21 (95% CI: 1.09 to 1.32), and  
157 exceeded that of the high-middle-SDI from 2011 onward (figure 1b right). In contrast,  
158 the low-SDI region still had the highest ASDR in 2019, at 25.28 per 100,000  
159 population (95% UI: 22.90-27.68), although it had the most significant declining trend

1  
2  
3 160 (EAPC: -0.27, 95% CI: -0.31 to -0.22) (figure 1b right). The ASDR was negatively  
4 161 correlated with SDI level worldwide ( $\rho = -0.603$ ,  $P < 0.0001$ , figure 1c), while the  
5 162 ASIR was positively correlated with SDI level ( $\rho = 0.54$ ,  $P < 0.0001$ , supplementary  
6 163 figure 4).

7  
8 164 At the regional level, death numbers in all 21 regions and the ASDRs in most regions  
9 165 showed increasing trends during this period (figure 1d). At the country level, CKD-  
10 166 related deaths increased by more than 500% in the United Arab Emirates, Venezuela,  
11 167 Estonia, Armenia, El Salvador and Ecuador over the three-decade study period  
12 168 (supplementary table 4). India (0.22 [95% UI: 0.19-0.26] million) surpassed inland  
13 169 China (0.20 [95% UI: 0.17-0.23] million) to be the largest number of CKD-related  
14 170 deaths in 2019. The number of deaths in the United States of America (0.11 [95% UI:  
15 171 0.10-0.11] million) were second to only those in India and China. The total number of  
16 172 deaths for these three countries accounted for 36.91% of the worldwide number of  
17 173 deaths in 2019 (figure 1e, supplementary figure 5). Nicaragua had the largest ASDR,  
18 174 at 80.24 (95% UI: 69.57-83.24) per 100,000 population (figure 1f, supplementary  
19 175 table 4). Estonia showed the fastest increase in the ASDR with an EAPC of 5.36 (95%  
20 176 CI: 4.91 to 5.81) during this period (figure 1g, supplementary table 4). While  
21 177 Mongolia had the fastest decrease in the ASDR of CKD (EAPC: -3.6, 95% UI: -4.07  
22 178 to -3.12) (figure 1g, supplementary table 4).

## 29 179 **2. The CKD-related death burden in males was higher than that in females in** 30 180 **relatively high SDI regions**

31  
32 181 Generally, the number of CKD-related deaths was larger in males than in females  
33 182 over the past 3 decades (figure 2a). At the SDI level, even though both showed  
34 183 increasing trends, the difference slightly narrowed with time, with the ratio of female  
35 184 deaths to male deaths changing from 0.915 in 1990 to 0.925 in 2019 (figure 2b). The  
36 185 ratio remained above 1 in the high-SDI region during this period. In 2019, the high-  
37 186 and high-middle-SDI regions had higher female death burdens, with ratios of female  
38 187 deaths to male deaths of 1.079 and 1.018, respectively, while the ratios in low- and  
39 188 low-middle-SDI regions were 0.802 and 0.812, which were the lowest (figure 2b left).  
40 189 Similar to the number of deaths, the CKD-related ASDR in males was higher than  
41 190 that in females over this period. In 2019, the female to male ASDR ratios ranged from  
42 191 0.6 to 0.8 in all the SDI regions (figure 2b right), suggesting that the CKD-related  
43 192 death burden was unbalanced between sexes and age groups.

44  
45 193 At the regional level, the female to male deaths ratios in Eastern Europe was the  
46 194 highest (1.32), and that in Oceania was the lowest (0.66) in 2019. Death cases of both  
47 195 sexes were mainly concentrated in Asia. Both male and female deaths in Latin  
48 196 America had the fastest increase over time. In contrast, female death numbers in  
49 197 Eastern Europe and male death numbers in Central Europe had the slowest increases  
50 198 (figure 2c, supplementary table 5). Unlike the number of deaths, the female to male  
51 199 ASDR ratios in most regions were less than 1.0, except in North Africa and Middle  
52 200 East (1.03). The ratio in Southern sub-Saharan Africa was the lowest, at 0.567  
53 201 (supplementary table 5).



1  
2  
3 202 At the country level, the numbers of male deaths in almost all the countries showed  
4 203 increasing trends, except in Slovakia and Poland. The death ratios in Estonia,  
5 204 Hungary, Latvia, Austria and Vietnam were over 1.5, which suggested that the CKD-  
6 205 related death burden was much higher in women than in men in these countries. In  
7 206 contrast, the ratio was less than 0.5 in Papua New Guinea and the United Arab  
8 207 Emirates, indicating a higher death burden in men (figure 2d, supplementary table 6).  
9 208 The ASDRs in both females and males in Mongolia showed the largest decreases,  
10 209 with decreases of 43.19% in females and 57.07% in males.

### 11 210 **3. The age-related CKD-related death burden is more serious in high-SDI** 12 211 **regions**

13 212 In 2019, global CKD-related deaths were mainly distributed in middle-aged and  
14 213 elderly people over 50 years old, specifically 50-74 years old, who accounted for  
15 214 41.91% (figure 3a). Those aged 50-74 years had the largest death numbers in all the  
16 215 SDI regions except high-SDI region. In high-SDI region, the numbers of CKD-related  
17 216 death were increased with age, with the largest in 85 plus age group. The numbers of  
18 217 deaths in the 85 plus age group had the greatest increases in all SDI regions (figure  
19 218 3a). Those aged 0-9 years showed decreases in the numbers of deaths in all the SDI  
20 219 regions except the low-SDI region. Those aged 10-24 years had increased numbers of  
21 220 deaths in the low- and low-middle-SDI regions (figure 3b). Therefore, premature  
22 221 deaths were mainly concentrated in the relatively lower SDI regions in 2019.

23 222 During this period, the age distribution of CKD-related deaths in the relatively young  
24 223 population, including the 0-9, 10-24 and 25-49, and 50-74 age groups, showed a  
25 224 declining trend (figure 3c). In contrast, deaths in elderly individuals, particularly those  
26 225 aged 85 years and older, showed an upward trend. Central Asia was the only region  
27 226 that saw a decline composition of 85 plus age group (figure 3c). As to SDI level, the  
28 227 proportion of deaths the 85 plus age group showed an upward trend with increasing  
29 228 SDI level, with the highest value of 58.20% in the Western Europe region in 2019.  
30 229 Eastern sub-Saharan Africa and Western sub-Saharan Africa, with lower SDI levels,  
31 230 had the highest proportions of the 10-24 and 0-9 age groups, respectively. The High-  
32 231 income Asia Pacific region had the largest increase in the proportion among the 85  
33 232 plus age group and the largest decrease among the 50-74 age group (figure 3c). These  
34 233 results revealed that the CKD-related death burden gradually shifted to elderly  
35 234 individuals in higher SDI regions. In addition, the proportion of females increased  
36 235 with increasing age was found in the further analysis of sex compositions among  
37 236 different age groups (figure 3d).

### 38 237 **4. CKD Burden attributable to risk factors**

39 238 Globally, metabolic disorders (such as diabetes, obesity and hypertension) were the  
40 239 main risk factors for death from CKD. Over this period, the numbers of deaths due to  
41 240 CKD attributable to high systolic blood pressure (SBP), high fasting plasma glucose  
42 241 (FPG) and high body mass index (BMI) sharply increased (figure 4a), which were the  
43 242 main risk factors contributing to the ASDR of CKD, accounting for 61.98%, 33.59%  
44 243 and 27.16%, respectively in 2019. Even though the ASDR of CKD attributable to



1  
2  
3 244 high BMI had the largest increase, at 77.09%, compared with 17.56% for high SBP  
4 245 and 20.41% for high FPG, the ranks of these risk factors did not change (figure 4a).  
5 246 CKD attributable to high SBP was associated with the highest ASDRs in all the SDI  
6 247 regions over this period (figure 4a). In 2019, high SBP-attributed death rate in the  
7 248 low-SDI region was the higher than in other SDI-regions (figure 4b), even though it  
8 249 showed the greatest reduction during the 30-year study period (decrease of 3.04%).  
9 250 The high SBP-attributed death rate in the high-SDI region saw the fastest increase  
10 251 (figure 4b). In 2019, ASDR attribute to high SBP in the high-middle-SDI region was  
11 252 the lowest. At the regional level, the rank of the high SBP-attributed ASDR in Central  
12 253 Latin America increased from sixth in 1990 to first among all 21 regions in 2019, with  
13 254 the greatest increase.

14 255 The highest FPG-attributed ASDRs were mainly concentrated in the low-middle and  
15 256 low-SDI regions during this period (figure 4b). In 2019, high FPG was the second  
16 257 most prevalent risk factor, followed by high BMI, in all regions except the high-SDI  
17 258 region (figure 4a, c). In contrast, BMI was ranked as the second most prevalent  
18 259 contributor, exceeding FPG, to the ASDR in the high-SDI region in 2019, even  
19 260 though the FPG-attributed death rate in this region showed a larger increase than  
20 261 those in other regions (figure 4b, c). In 2019, the FPG-attributed ASDR in the middle-  
21 262 SDI region was higher than those in the other SDI regions, while that in the high-  
22 263 middle-SDI region was the lowest (figure 4b). The BMI-attributed ASDR in the  
23 264 middle-SDI was the highest, while in the high-middle SDI, it was the lowest. It is  
24 265 worth noting that the BMI-attributed ASDRs in all five SDI regions had steep  
25 266 increasing trends over this period (figure 4b). A diet high in sodium was the fourth-  
26 267 ranked contributor to the CKD ASDR in the high-middle-, middle- and low-middle-  
27 268 SDI regions and the fifth-ranked contributor in the high- and low-SDI regions (figure  
28 269 4a).

29 270 Notably, although the high temperature-related death burden was low (figure 4c), the  
30 271 high temperature-attributed ASDRs increased steeply in the low-middle- and low-SDI  
31 272 regions over this period (figure 4b). These regions had the highest high temperature-  
32 273 attributed ASDRs in 2019 (figure 4c). In sharp contrast, the high temperature-  
33 274 attributed ASDRs in the high-middle- and high-SDI regions decreased by 7.62 and  
34 275 6.55 times, respectively, compared with those in 1990 (figure 4b). The high-middle-  
35 276 SDI region had the lowest high temperature-related death rate in 2019. At the regional  
36 277 level, East Asia, High-income North America, South Asia and Western Europe  
37 278 showed the fastest increases in the high temperature-attributed ASDRs, and South  
38 279 Asia had the highest high temperature-attributed death rate in 2019. Central Latin  
39 280 America and Southeast Asia had the fastest decreases in the high temperature-  
40 281 attributed ASDR. Tropical Latin America, Southern sub-Saharan Africa and Eastern  
41 282 sub-Saharan Africa had the lowest values.

## 283 **DISCUSSION**

284 284 Despite advancements in scientific research that have led to a better understanding of  
285 285 the pathogenesis of diseases and significant improvements in disease management, no

1  
2  
3 286 significant improvement was observed in the burden of CKD-related deaths, in  
4 287 contrast with other noncommunicable diseases. CKD is characterized by a gradual  
5 288 decline kidney function that eventually results in end-stage renal disease (ESRD),  
6 289 with little chance of reversal. CKD is therefore an important cause of morbidity and  
7 290 mortality among noncommunicable diseases.<sup>15</sup>  
8  
9 291 Our results showed significant regional variations in the CKD-related death burdens.  
10 292 The ASDR of CKD was associated with SDI, with higher CKD ASDRs in lower SDI  
11 293 regions. This may be related to a lack of effective health interventions caused by  
12 294 inadequate health care funding and weak health systems in lower SDI regions.<sup>16</sup> If  
13 295 these trends continue, differences in the CKD death burden among regions will  
14 296 increase further. In terms of geographical regions and countries, the CKD death  
15 297 burden in Mesoamerica (especially Nicaragua, El Salvador and Mexico) was more  
16 298 serious than those in other geographical locations. This may be due to the  
17 299 megathermal climate or the rates of diabetes and hypertension, which are major risk  
18 300 factors globally.<sup>17</sup> A recent study revealed that agricultural workers who currently or  
19 301 used to work in the sugarcane industry may be at high-risk of CKD.<sup>17 18</sup> In addition,  
20 302 climate change in this region may be a risk factor for CKD-related death.<sup>19</sup> These  
21 303 findings call for increased government planning and interventions and the  
22 304 development of new and more appropriate solutions to address the CKD death burden  
23 305 in this area.  
24  
25 306 Globally, the number of CKD-related deaths and ASDR were larger and higher in  
26 307 males than in females, but the difference narrowed over time. It is worth noting that  
27 308 the sex ratio of deaths in the high-SDI region remained above 1 during the study  
28 309 period, but the ASDR ratio did not, which may be attributed to the increase in the  
29 310 population and the aging of the population in this region, especially among females.  
30 311 In contrast, the sex ratio of the ASDR was higher than the ratio of deaths in several  
31 312 countries in the Middle East, such as Egypt (1.60 vs. 1.13 in Egypt). This result  
32 313 coincided with the lower disability-free life expectancy among women's total lifetime  
33 314 in this region.<sup>20</sup>  
34  
35 315 Over the past 30 years, the age distribution of CKD-related deaths showed a gradual  
36 316 increasing trend with age, and people in the middle-aged and elderly groups (> 50  
37 317 years old) accounted for the main proportion of CKD deaths. This trend may be  
38 318 closely related to improvements in health care as well as population aging worldwide.  
39 319 However, in regions with relatively low SDIs, such as Africa, premature deaths are  
40 320 still prevalent, with increasing numbers, which may be explained by the low levels of  
41 321 medical and health care in these regions. Patients diagnosed with CKD may not  
42 322 receive timely and adequate medical care to slow the progression of renal  
43 323 deterioration, resulting in premature death, which reflects the impact of  
44 324 socioeconomic development on premature CKD-related deaths.<sup>21</sup> Therefore, policy  
45 325 makers and the health care sector in these regions should implement urgent measures  
46 326 to reverse this negative trend.  
47  
48 327 The most cost-effective strategy to reduce the number of CKD-related deaths is

1  
2  
3 328 preventing the onset of CKD.<sup>22</sup> Therefore, screening high-risk groups and developing  
4 329 interventions targeting a variety of risk factors are the most effective approaches.<sup>22 23</sup>  
5 330 High SBP, FPG and BMI were the main risk factors for CKD-related death.<sup>1 6 24</sup>  
6 331 Hence, implementing measures to improve blood pressure, plasma glucose and body  
7 332 weight is critical for reducing the CKD burden.<sup>25</sup>  
8 333 Although the CKD-related death burden attributed to high temperature exposure was  
9 334 low, the rapid upward trend, especially in the low- and low-middle-SDI regions,  
10 335 should be noted. In contrast, this burden in the high- and high-middle-SDI regions  
11 336 tended to remain stable or even decreased. Some studies recently reported large  
12 337 numbers of young sugarcane workers with end-stage of CKD, who did not have any  
13 338 known risk factors for CKD, such as high blood pressure or diabetes before.<sup>17</sup>  
14 339 Subsequent reports found that CKD of unknown origin also occurred in people who  
15 340 worked in agriculture or construction in other low-socioeconomic areas.<sup>26</sup> It has  
16 341 already been the leading cause of hospitalization and death among CKD patients in  
17 342 Central America.<sup>27</sup> Even though the exact pathogenesis of CKD in these individuals is  
18 343 currently unknown, it is undoubtedly related to heat exposure and dehydration caused  
19 344 by rapidly changing environmental conditions.<sup>26 28 29</sup> Compared with the higher SDI  
20 345 regions, the ability to provide health care and adapt to climate change in relative  
21 346 lower regions were limited; therefore, the situation is severely affected by high  
22 347 temperature exposure and is getting worse.<sup>29</sup> Local governments should formulate  
23 348 effective measures to cope with the high-temperature environment and formulate  
24 349 strategies to mitigate climate change. Moreover, cooperation among clinicians, public  
25 350 health personnel, government agencies and medical researchers should be promoted  
26 351 to raise public awareness of CKD, actively explore the specific mechanism of the  
27 352 influence of high temperature exposure on CKD and minimize the adverse effects of  
28 353 climate change on kidney health.

## 354 **CONCLUSIONS**

355 In summary, CKD remains a critical global public health concern. CKD-related  
356 deaths continue to increase, with the majority now occurring in elderly adults, mainly  
357 due to the increase in and the aging of the global population. However, the numbers  
358 of premature deaths in regions with low-SDI levels remain high, and the trend is  
359 increasing. In addition, the burden of CKD-related deaths is more severe in men than  
360 in women, though this difference is likely to narrow over time. Hypertension, diabetes  
361 and obesity remain critical risk factors for CKD. Moreover, in the low-SDI region, the  
362 rapidly increasing number of CKD-related deaths attributed to high temperature  
363 exposure should not be ignored, and national-level measures should be taken to  
364 reverse this trend.

## 365 **Acknowledgments**

366 Authors appreciate all the collaborators involved in the GBD study 2019.

## 367 **Competing interests**

368 No competing interests to declare.

## 369 **Contributors**

1  
2  
3 370 The idea and conceptual design: YL and XS; Data acquisition: ZC and NH; Literature  
4 371 retrieval and data collation: XL and XF; Data analysis: ZC and JL; Visualization: XL  
5 372 and YL; Preparation of the original draft: ZC and NH; Manuscript editing: YL and  
6 373 XS. Authors confirm that all of them have full access to all the data of the present  
7 374 study and are responsible for submitting for publication.

9 375 **Funding**

10 376 This work was supported by the National Natural Science Foundation of China (Grant  
11 377 No. 82000753) and the Nature Science Foundation of Shandong Province (Grant No.  
12 378 ZR2020QH086).

13 379 **Ethics approval**

14 380 Not applicable. Data of this study was publicly available and no patient and animal  
15 381 was involved.

16 382 **Data sharing statement**

17 383 Data are available in public database.

18 384

385 **REFERENCES**

- 386 1. Collaboration GCKD. Global, regional, and national burden of  
387 chronic kidney disease, 1990–2017: a systematic analysis for the  
388 Global Burden of Disease Study 2017. *Lancet* 2020;395:709–33.
- 389 2. Levey AS, Atkins R, Coresh J, *et al*. Chronic kidney disease as  
390 a global public health problem: approaches and initiatives – a  
391 position statement from Kidney Disease Improving Global Outcomes.  
392 *Kidney Int* 2007;72:247–59.
- 393 3. Dai H, Alsalhe TA, Chalghaf N, *et al*. The global burden of disease  
394 attributable to high body mass index in 195 countries and  
395 territories, 1990–2017: An analysis of the Global Burden of  
396 Disease Study. 2020;17:e1003198.
- 397 4. Kovács N, Nagy A, Dombrádi V, *et al*. Inequalities in the Global  
398 Burden of Chronic Kidney Disease Due to Type 2 Diabetes Mellitus:  
399 An Analysis of Trends from 1990 to 2019. 2021;18
- 400 5. Campbell JR, Johnston JC, Ronald LA, *et al*. Screening for Latent  
401 Tuberculosis Infection in Migrants With CKD: A Cost-  
402 effectiveness Analysis. *Am J Kidney Dis* 2019;73:39–50.
- 403 6. Chen A, Zou M, Young CA, *et al*. Disease Burden of Chronic Kidney  
404 Disease Due to Hypertension From 1990 to 2019: A Global Analysis.  
405 *Front Med (Lausanne)* 2021;8:690487.
- 406 7. Xie Y, Bowe B, Mokdad AH, *et al*. Analysis of the Global Burden  
407 of Disease study highlights the global, regional, and national  
408 trends of chronic kidney disease epidemiology from 1990 to 2016.  
409 *Kidney Int* 2018;94:567–81.
- 410 8. Norhammar A, Bodegard J, Eriksson JW, *et al*. Cost of healthcare  
411 utilization associated with incident cardiovascular and renal  
412 disease in individuals with type 2 diabetes: a multinational,  
413 observational study across 12 countries. 2022
- 414 9. Garofalo C, Borrelli S, Provenzano M, *et al*. Dietary Salt  
415 Restriction in Chronic Kidney Disease: A Meta-Analysis of  
416 Randomized Clinical Trials. 2018;10
- 417 10. Global burden of 369 diseases and injuries in 204 countries and  
418 territories, 1990–2019: a systematic analysis for the Global  
419 Burden of Disease Study 2019. *Lancet* 2020;396:1204–22.
- 420 11. Global burden of 87 risk factors in 204 countries and territories,  
421 1990–2019: a systematic analysis for the Global Burden of Disease  
422 Study 2019. *Lancet* 2020;396:1223–49.
- 423 12. Global age–sex–specific fertility, mortality, healthy life  
424 expectancy (HALE), and population estimates in 204 countries and  
425 territories, 1950–2019: a comprehensive demographic analysis for

- 1  
2  
3 426 the Global Burden of Disease Study 2019. *Lancet* 2020;396:1160-  
4 427 203.
- 6 428 13. Liu Z, Jiang Y, Yuan H, *et al.* The trends in incidence of primary  
7 429 liver cancer caused by specific etiologies: Results from the  
8 430 Global Burden of Disease Study 2016 and implications for liver  
9 431 cancer prevention. *J Hepatol* 2019;70:674-83.
- 11 432 14. Wang W, Hu M, Liu H, *et al.* Global Burden of Disease Study 2019  
12 433 suggests that metabolic risk factors are the leading drivers of  
13 434 the burden of ischemic heart disease. *Cell Metab* 2021;33:1943-  
14 435 56.e2.
- 17 436 15. Stanifer JW, Von Isenburg M, Chertow GM, *et al.* Chronic kidney  
18 437 disease care models in low- and middle-income countries: a  
19 438 systematic review. *BMJ Glob Health* 2018;3:e000728.
- 21 439 16. Ameh OI, Ekrikpo UE, Kengne AP. Preventing CKD in Low- and  
22 440 Middle-Income Countries: A Call for Urgent Action. *Kidney Int*  
23 441 *Rep* 2020;5:255-62.
- 25 442 17. Ferguson R, Leatherman S, Fiore M, *et al.* Prevalence and Risk  
26 443 Factors for CKD in the General Population of Southwestern  
27 444 Nicaragua. *J Am Soc Nephrol* 2020;31:1585-93.
- 29 445 18. Hansson E, Mansourian A, Farnaghi M, *et al.* An ecological study  
30 446 of chronic kidney disease in five Mesoamerican countries:  
31 447 associations with crop and heat. *BMC Public Health* 2021;21:840.
- 33 448 19. Sasai F, Roncal-Jimenez C, Rogers K, *et al.* Climate Change and  
34 449 Nephrology. *Nephrol Dial Transplant* 2021
- 36 450 20. Metwally S. Disability-free life expectancy at old ages in Egypt.  
37 451 *J Biosoc Sci* 2021;53:290-304.
- 38 452 21. Bello AK, Levin A, Tonelli M, *et al.* Assessment of Global Kidney  
39 453 Health Care Status. *Jama* 2017;317:1864-81.
- 41 454 22. Komenda P, Ferguson TW, Macdonald K, *et al.* Cost-effectiveness  
42 455 of primary screening for CKD: a systematic review. *Am J Kidney*  
43 456 *Dis* 2014;63:789-97.
- 45 457 23. Cardiovascular disease, chronic kidney disease, and diabetes  
46 458 mortality burden of cardiometabolic risk factors from 1980 to  
47 459 2010: a comparative risk assessment. *Lancet Diabetes Endocrinol*  
48 460 2014;2:634-47.
- 51 461 24. Li H, Lu W, Wang A, *et al.* Changing epidemiology of chronic  
52 462 kidney disease as a result of type 2 diabetes mellitus from 1990  
53 463 to 2017: Estimates from Global Burden of Disease 2017. *J Diabetes*  
54 464 *Investig* 2021;12:346-56.
- 56 465 25. Ene-Iordache B, Perico N, Bikbov B, *et al.* Chronic kidney disease  
57 466 and cardiovascular risk in six regions of the world (ISN-KDDC):  
58 467 a cross-sectional study. *Lancet Glob Health* 2016;4:e307-19.
- 60



- 1  
2  
3 468 26. Johnson RJ, Wesseling C, Newman LS. Chronic Kidney Disease of  
4 469 Unknown Cause in Agricultural Communities. *N Engl J Med*  
5 470 2019;380:1843-52.  
6  
7 471 27. Sorensen C, Garcia-Trabanino R. A New Era of Climate Medicine -  
8 472 Addressing Heat-Triggered Renal Disease. *N Engl J Med*  
9 473 2019;381:693-96.  
10  
11 474 28. Harries AD. Chronic kidney disease, tuberculosis and climate  
12 475 change. *Int J Tuberc Lung Dis* 2020;24:132-33.  
13  
14 476 29. Borg MA, Bi P. The impact of climate change on kidney health.  
15 477 *Nat Rev Nephrol* 2021;17:294-95.  
16 478  
17  
18 479

For peer review only

1  
2  
3 480 **Figure legends**  
4  
5

6 481 **figure 1.** Global death cases and death rate of CKD from 1990 to 2019. (A) Death  
7 482 cases in global and SDI areas in 1990 and 2019. (B) Death cases and ASDRs in global  
8 483 and SDI areas from 1990 to 2019. (C) Relationship between ASDRs and SDI from  
9 484 1990 to 2019. (D) Death cases and ASDRs in 21 geographic regions from 1990 to  
10 485 2019. (E) Death cases in 204 countries and territories in 2019. (F) The ASDRs in 204  
11 486 countries and territories in 1990 and 2019. (G) The EAPCs of ASDRs in 204  
12 487 countries and territories from 1990 to 2019. ASDR, age-standardized death rate (per  
13 488 100,000 population).

14  
15  
16  
17 489 **figure 2.** Sex differences and trends of CKD deaths and ASDR from 1990 to 2019.  
18 490 (A) The ASDRs in males and females globally from 1990 to 2019. (B) Death cases  
19 491 ratio between females to males (left) and ASDR ratio between females to males  
20 492 (right), in global and SDI areas in 1990 and 2019. (C) Gender composition of death  
21 493 cases and ASDR in global and SDI areas in 1990 and 2019. (D) Death cases ratio  
22 494 between females to males (left) and ASDR ratio between females to males (right) in  
23 495 204 countries and territories in 2019. ASDR, age-standardized death rate (per 100,000  
24 496 population).

25  
26  
27  
28  
29 497 **figure 3.** The distribution of CKD death cases and rates in age groups, SDI areas and  
30 498 21 geographic regions from 1990 to 2019. (A) Death cases in age groups in global and  
31 499 SDI areas from 1990 to 2019. (B) The change percentage of death cases (right) and  
32 500 rate (left) in age groups from 1990 to 2019. (C) Six age groups as percentages of total  
33 501 deaths in global, SDI areas and 21 geographic regions in 1990 and 2019. (D) Gender  
34 502 composition of death in global and SDI areas in 2019.

35  
36  
37  
38 503 **figure 4.** Predominant contribution of risk factors to CKD-related deaths in global and  
39 504 SDI areas. (A) Death cases and ASDRs attributed to main risk factors by SDI region  
40 505 from 1990 to 2019. (B) The ASDRs trends in SDI regions attributed to each main risk  
41 506 factor. (C) Proportions of deaths in global and SDI regions attributed to each risk  
42 507 factors in 2019. ASDR, age-standardized death rate (per 100,000 population).  
43  
44  
45  
46  
47  
48  
49  
50  
51  
52  
53  
54  
55  
56  
57  
58  
59  
60



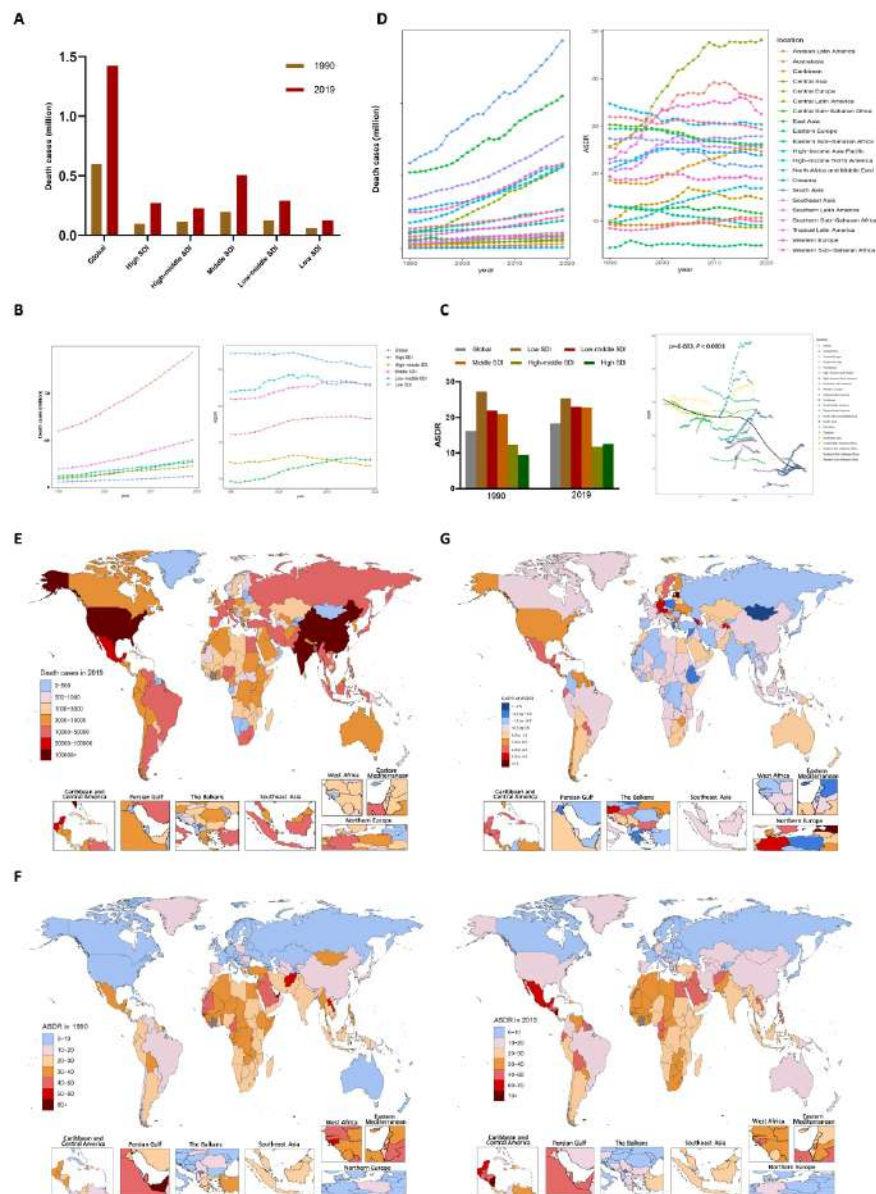

figure 1. Global death cases and death rate of CKD from 1990 to 2019. (A) Death cases in global and SDI areas in 1990 and 2019. (B) Death cases and ASDRs in global and SDI areas from 1990 to 2019. (C) Relationship between ASDRs and SDI from 1990 to 2019. (D) Death cases and ASDRs in 21 geographic regions from 1990 to 2019. (E) Death cases in 204 countries and territories in 2019. (F) The ASDRs in 204 countries and territories in 1990 and 2019. (G) The EAPCs of ASDRs in 204 countries and territories from 1990 to 2019. ASDR, age-standardized death rate (per 100,000 population).

573x778mm (192 x 192 DPI)

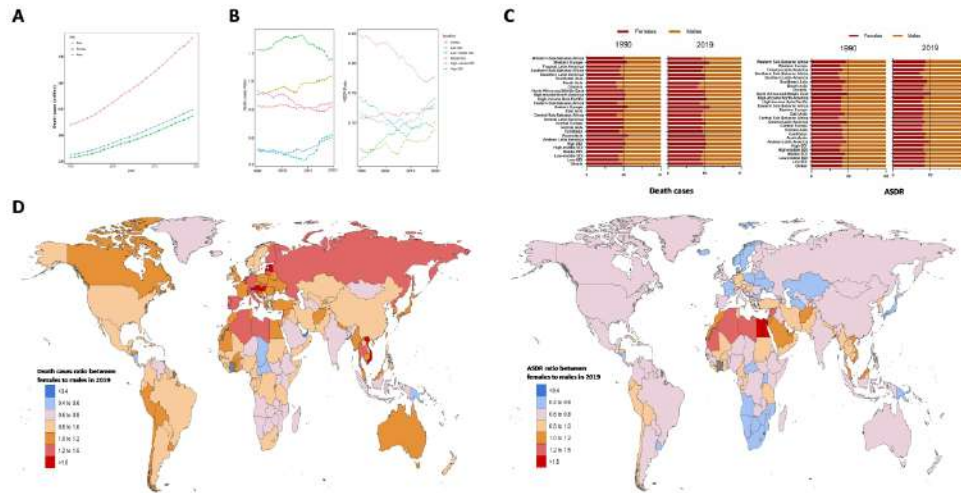

figure 2. Sex differences and trends of CKD deaths and ASDR from 1990 to 2019. (A) The ASDRs in males and females globally from 1990 to 2019. (B) Death cases ratio between females to males (left) and ASDR ratio between females to males (right), in global and SDI areas in 1990 and 2019. (C) Gender composition of death cases and ASDR in global and SDI areas in 1990 and 2019. (D) Death cases ratio between females to males (left) and ASDR ratio between females to males (right) in 204 countries and territories in 2019. ASDR, age-standardized death rate (per 100,000 population).

546x273mm (192 x 192 DPI)

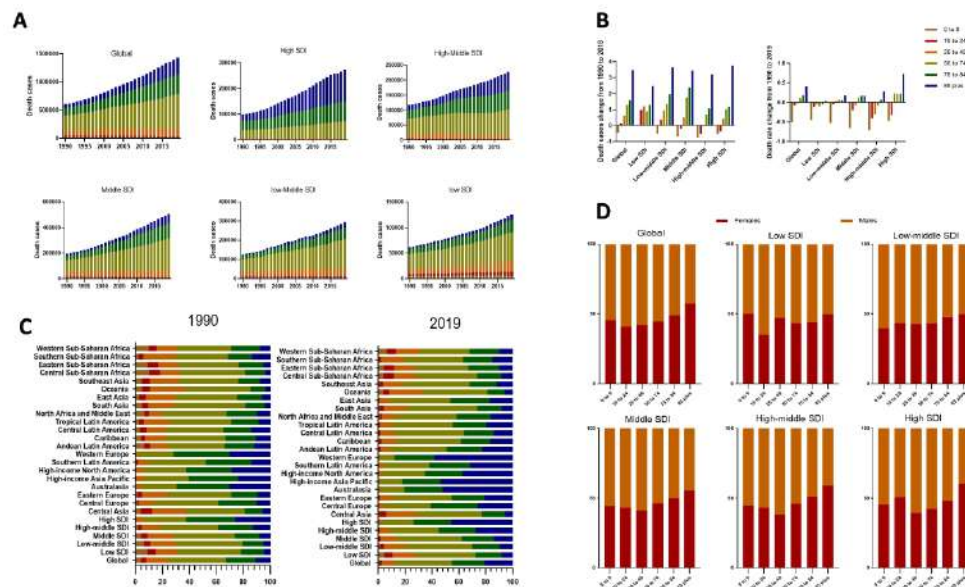

figure 3. The distribution of CKD death cases and rates in age groups, SDI areas and 21 geographic regions from 1990 to 2019. (A) Death cases in age groups in global and SDI areas from 1990 to 2019. (B) The change percentage of death cases (right) and rate (left) in age groups from 1990 to 2019. (C) Six age groups as percentages of total deaths in global, SDI areas and 21 geographic regions in 1990 and 2019. (D) Gender composition of death in global and SDI areas in 2019.

452x277mm (192 x 192 DPI)

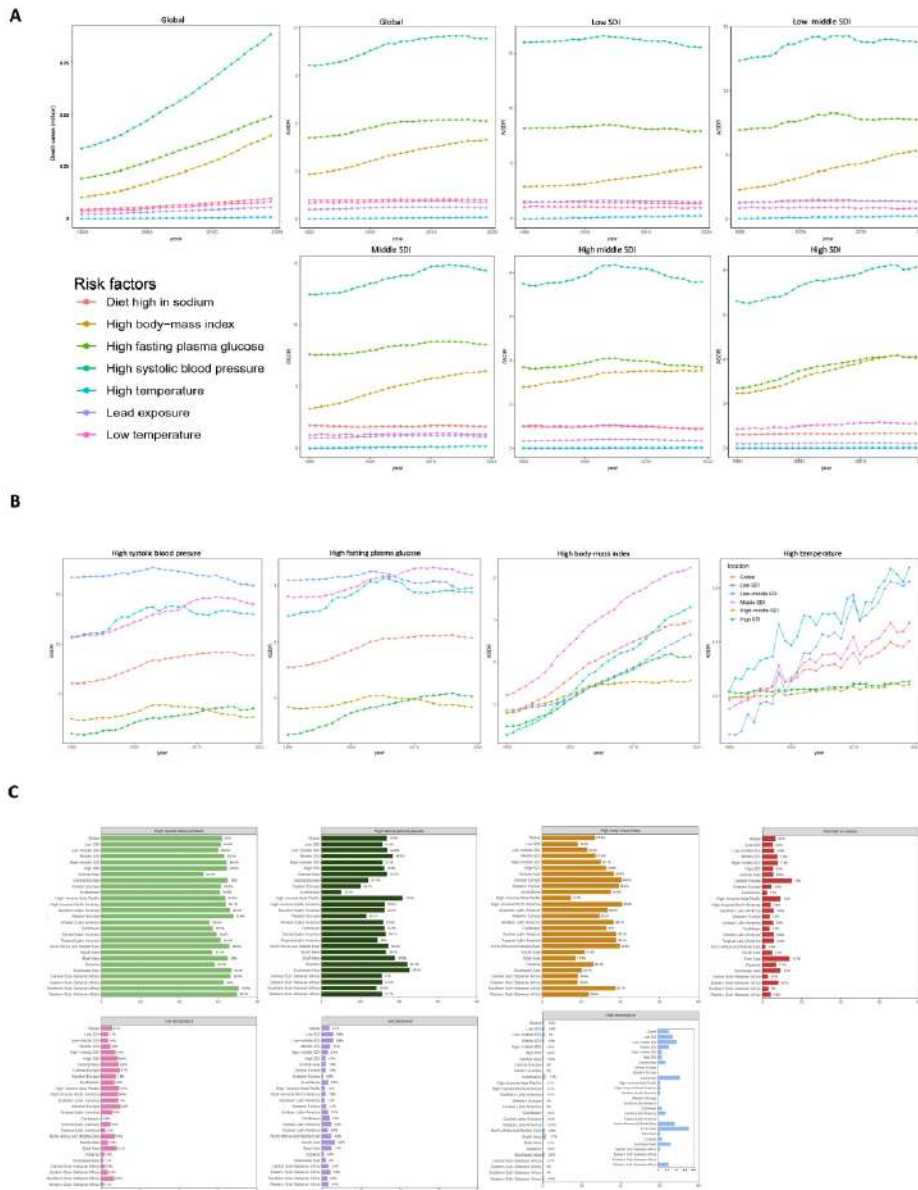

figure 4. Predominant contribution of risk factors to CKD-related deaths in global and SDI areas. (A) Death cases and ASDRs attributed to main risk factors by SDI region from 1990 to 2019. (B) The ASDRs trends in SDI regions attributed to each main risk factor. (C) Proportions of deaths in global and SDI regions attributed to each risk factors in 2019. ASDR, age-standardized death rate (per 100,000 population).

524x670mm (192 x 192 DPI)

# Global Death Burden of Chronic Kidney Disease from 1990 to 2019

**Supplemental figure 1. Numbers of prevalence, incidence and DALYs of CKD in global and SDI areas in 1990 and 2019. DALYs, disability-adjusted life years.**

**Supplemental figure 2. The rank change of death numbers, ASDR, ASPR, ASR-DALYs, ASR-YLLs and ASR- YLDs of CKD from 1990 to 2019. DALYs, disability-adjusted life years. YLLs, years of life lost prematurely. YLDs, years lived with disability. ASDR, age-standardized death rate (per 100,000 population). ASPR, age-standardized prevalence rate (per 100,000 population). ASR-DALYs, age-standardized DALYs rate (per 100,000 population). ASR-YLLs, age-standardized YLLs rate (per 100,000 population). ASR-YLDs, age-standardized YLDs rate (per 100,000 population).**

**Supplemental figure 3. Temporal trends of ASDR, ASIR, ASPR, ASR-DALYs, ASR-YLLs and ASR- YLDs of CKD by genders from 1990 to 2019. DALYs, disability-adjusted life years. YLLs, years of life lost prematurely. YLDs, years lived with disability. ASDR, age-standardized death rate (per 100,000 population). ASPR, age-standardized prevalence rate (per 100,000 population). ASIR, age-standardized incidence rate (per 100,000 population). ASR-DALYs, age-standardized DALYs rate (per 100,000 population). ASR-YLLs, age-standardized YLLs rate (per 100,000 population). ASR-YLDs, age-standardized YLDs rate (per 100,000 population).**

**Supplemental figure 4. Relationship between ASR of prevalence, incidence and DALYs, with SDI from 1990 to 2019.**

**Supplemental figure 5. The proportions of death numbers in India, China and America in global.**

**Supplemental table 1. Prevalence cases and age-standardized prevalence rate (ASPR) of chronic kidney disease in 1990 and 2019, and the temporal trends**

1  
2  
3  
4  
5 **from 1990 to 2019 in global and regions.**  
6

7  
8 **Supplemental table 2. Incidence cases and age-standardized incidence rate (ASIR) of chronic kidney disease in 1990 and 2019, and the temporal trends from**  
9 **1990 to 2019 in global and regions.**  
10

11  
12 **Supplemental table 3. DALYs and age-standardized DALYs rate (ASR-DALYs) of chronic kidney disease in 1990 and 2019, and the temporal trends from**  
13 **1990 to 2019 in global and regions.**  
14

15  
16  
17 **Supplemental table 4. Deaths and age-standardized death rate (ASDR) of chronic kidney disease in 1990 and 2019, and the temporal trends from 1990 to 2019**  
18 **in 204 countries.**  
19

20  
21 **Supplemental table 5. Death cases ratio between females to males and age-standardized death rate (ASDR) ratio between females to males in 21 geographic**  
22 **regions from 1990 to 2019 in 21 regions.**  
23

24  
25  
26 **Supplemental table 6. Death cases ratio between females to males and age-standardized death rate (ASDR) ratio between females to males in 204 countries**  
27 **and territories from 1990 to 2019 in 204 countries.**  
28  
29  
30  
31  
32  
33  
34  
35  
36  
37  
38  
39  
40  
41  
42  
43  
44  
45  
46

1  
2  
3  
4  
5  
6  
7  
8  
9  
10  
11  
12  
13  
14  
15  
16  
17  
18  
19  
20  
21  
22  
23  
24  
25  
26  
27  
28  
29  
30  
31  
32  
33  
34  
35  
36  
37  
38  
39  
40  
41  
42  
43  
44  
45  
46

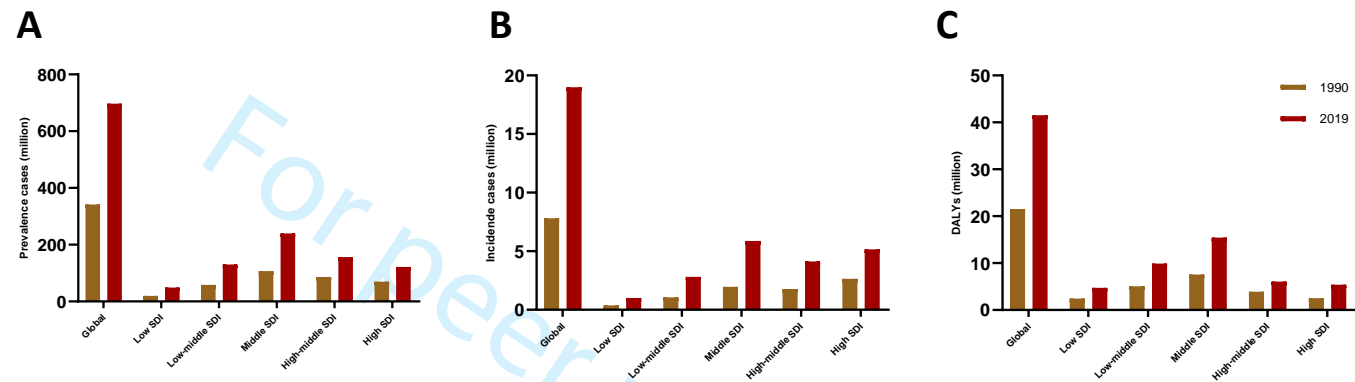

Supplemental figure 1. Numbers of prevalence, incidence and DALYs of CKD in global and SDI areas in 1990 and 2019. DALYs, disability-adjusted life years.



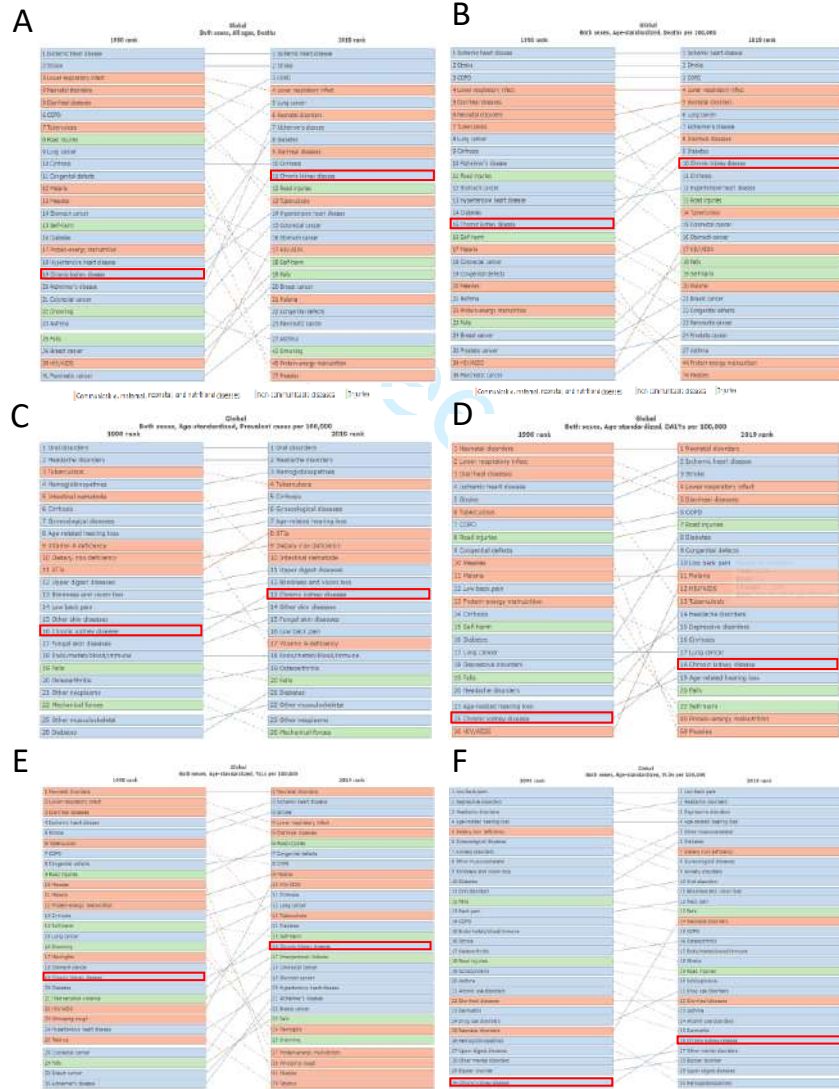



1  
2  
3  
4  
5  
6  
7  
8  
9  
10  
11  
12  
13  
14  
15  
16  
17  
18  
19  
20  
21  
22  
23  
24  
25  
26  
27  
28  
29  
30  
31  
32  
33  
34  
35  
36  
37  
38  
39  
40  
41  
42  
43  
44  
45  
46

**Supplemental figure 2. The rank change of death numbers, ASDR, ASPR, ASR-DALYs, ASR-YLLs and ASR- YLDs of CKD from 1990 to 2019.** DALYs, disability-adjusted life years. YLLs, years of life lost prematurely. YLDs, years lived with disability. ASDR, age-standardized death rate (per 100,000 population). ASPR, age-standardized prevalence rate (per 100,000 population). ASR-DALYs, age-standardized DALYs rate (per 100,000 population). ASR-YLLs, age-standardized YLLs rate (per 100,000 population). ASR-YLDs, age-standardized YLDs rate (per 100,000 population).

For peer review only

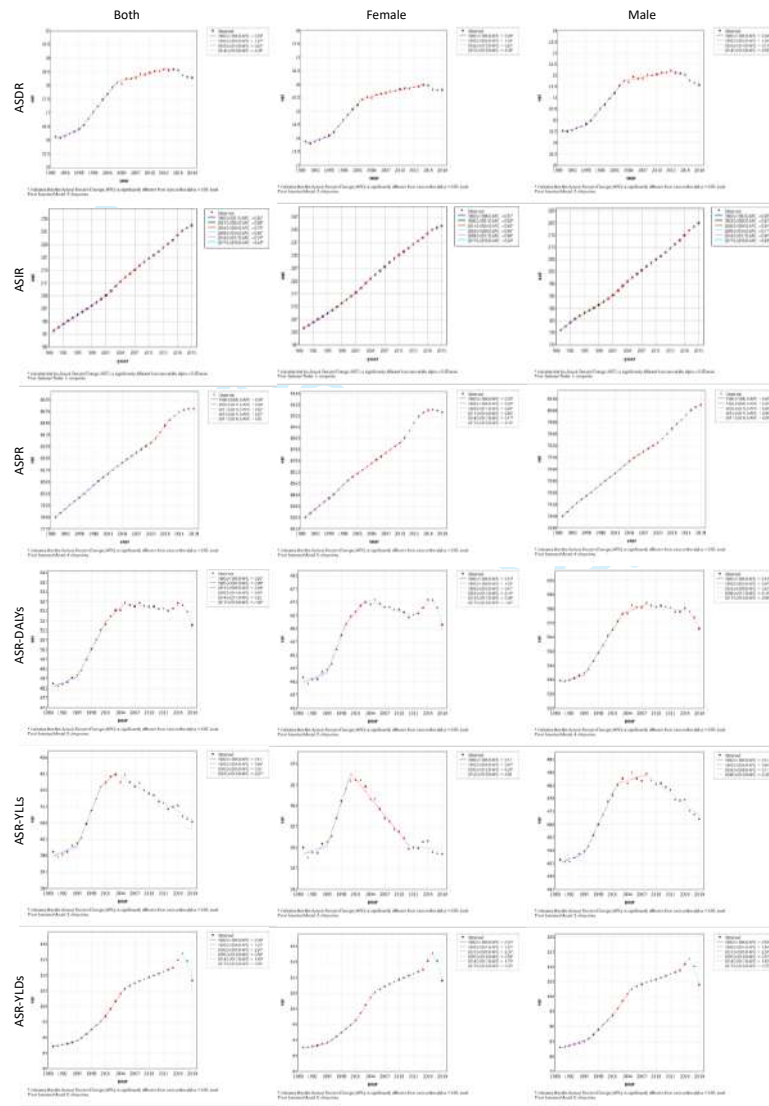

1  
2  
3  
4  
5  
6  
7  
8  
9  
10  
11  
12  
13  
14  
15  
16  
17  
18  
19  
20  
21  
22  
23  
24  
25  
26  
27  
28  
29  
30  
31  
32  
33  
34  
35  
36  
37  
38  
39  
40  
41  
42  
43  
44  
45  
46

1  
2  
3  
4  
5  
6  
7  
8  
9  
10  
11  
12  
13  
14  
15  
16  
17  
18  
19  
20  
21  
22  
23  
24  
25  
26  
27  
28  
29  
30  
31  
32  
33  
34  
35  
36  
37  
38  
39  
40  
41  
42  
43  
44  
45  
46

**Supplemental figure 3. Temporal trends of ASDR, ASIR, ASPR, ASR-DALYs, ASR-YLLs and ASR- YLDs of CKD by genders from 1990 to 2019.** DALYs, disability-adjusted life years. YLLs, years of life lost prematurely. YLDs, years lived with disability. ASDR, age-standardized death rate (per 100,000 population). ASPR, age-standardized prevalence rate (per 100,000 population). ASIR, age-standardized incidence rate (per 100,000 population). ASR-DALYs, age-standardized DALYs rate (per 100,000 population). ASR-YLLs, age-standardized YLLs rate (per 100,000 population). ASR-YLDs, age-standardized YLDs rate (per 100,000 population).

For peer review only

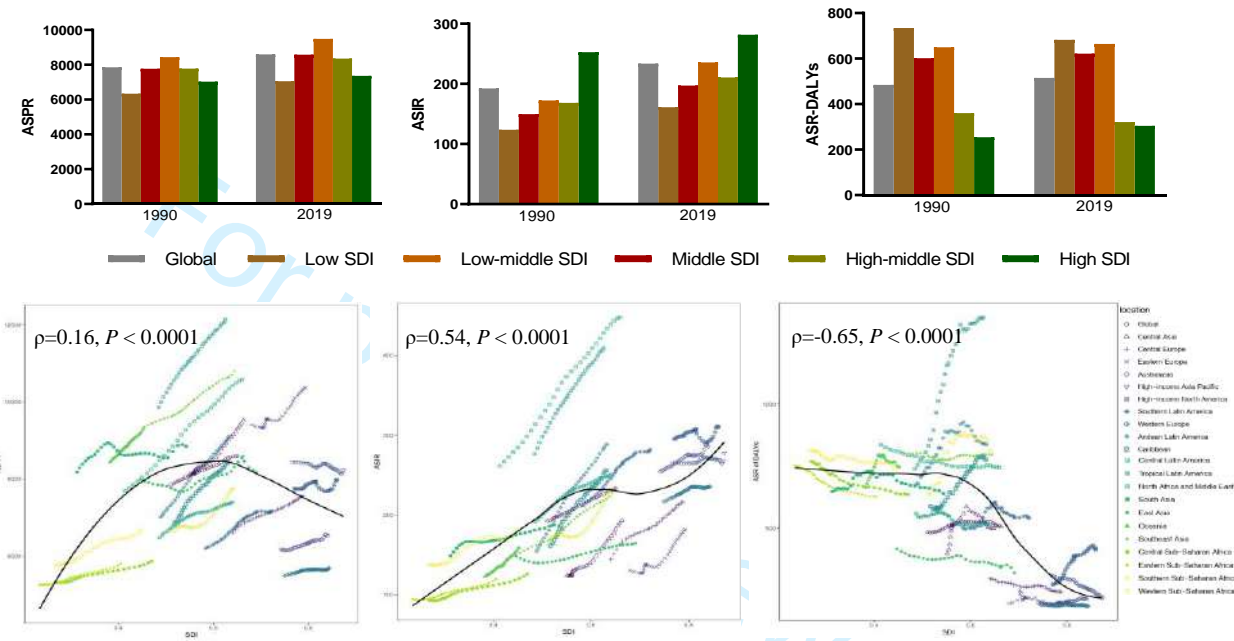

Supplemental figure 4. Relationship between ASR of prevalence, incidence and DALYs, with SDI from 1990 to 2019.

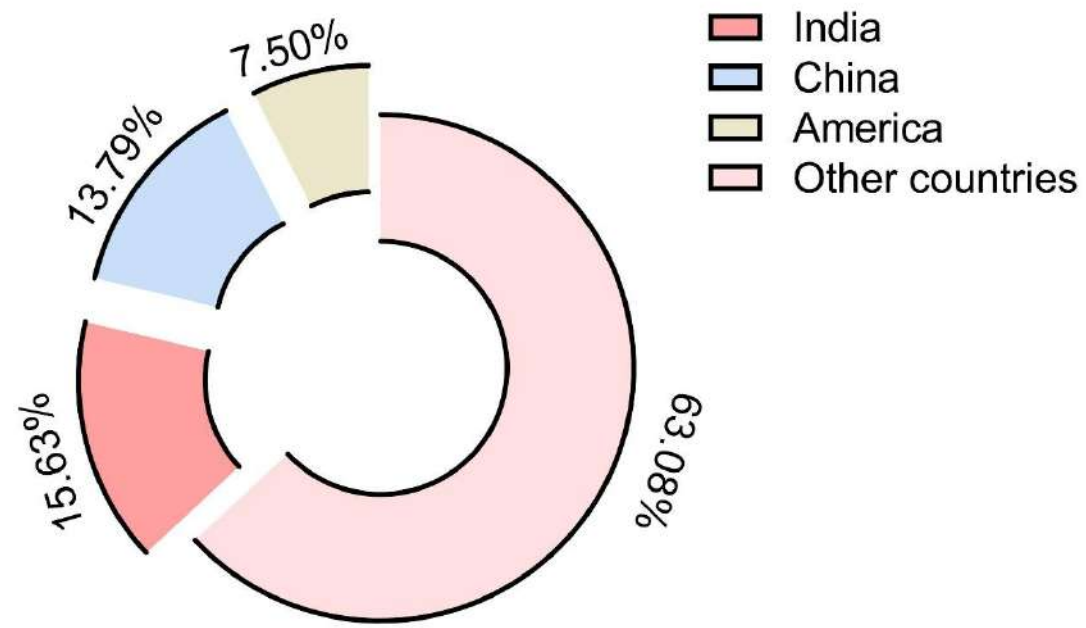

Supplemental figure 5. The proportions of death numbers in India, China and America in global.

only

1  
2  
3  
4  
5 **Supplemental table 1. Prevalence cases and age-standardized prevalence rate (ASPR) of chronic kidney disease in 1990 and 2019, and the temporal trends**  
6 **from 1990 to 2019 in global and regions.**  
7  
8  
9  
10  
11  
12  
13  
14  
15  
16  
17  
18  
19  
20  
21  
22  
23  
24  
25  
26  
27  
28  
29  
30  
31  
32  
33  
34  
35  
36  
37  
38  
39  
40  
41  
42  
43  
44  
45  
46

For peer review only

| Characteristics               | 1990                                 |                           | 2019                                 |                            | 1990-2019             |
|-------------------------------|--------------------------------------|---------------------------|--------------------------------------|----------------------------|-----------------------|
|                               | Prevalence cases (*10 <sup>6</sup> ) | ASPR per 100,000          | Prevalence cases (*10 <sup>6</sup> ) | ASPR per 100,000           | EAPC of ASPR (95% CI) |
|                               | (95% UI)                             | population (95% UI)       | (95% UI)                             | population (95% UI)        |                       |
| Global                        | 341.67 (316.59-366.107.7)            | 7855.83 (7300.33-8372.66) | 697.29 (650.05-741080.75)            | 8596.21 (8015.74-9125.28)  | 0.32 (0.32 to 0.33)   |
| <b>Gender</b>                 |                                      |                           |                                      |                            |                       |
| Males                         | 153.14 (141.72-164.63)               | 7349.01 (6823.3-7842.18)  | 314.32 (292.96-334.84)               | 8109.77 (7572.96-8608.03)  | 0.69 (0.68 to 0.7)    |
| Females                       | 188.52 (174.87-201.34)               | 8305.89 (7710.48-8854.59) | 382.98 (356.75-406.65)               | 9049.82 (8425.02-9616.13)  | 0.69 (0.68 to 0.7)    |
| <b>Sociodemographic index</b> |                                      |                           |                                      |                            |                       |
| Low                           | 19.74 (18.26-21321.4)                | 6338.15 (5882.6-6789.29)  | 48.7 (45.05-52510.46)                | 7057.41 (6568.24-7529.2)   | 0.34 (0.32 to 0.36)   |
| Low-middle                    | 58.61 (54.03-63338.25)               | 7766.83 (7198.66-8314.67) | 130.15 (120.81-139501.25)            | 8579.86 (7996.24-9142.82)  | 0.25 (0.21 to 0.29)   |
| Middle                        | 107.24 (98.79-115911.52)             | 8440.84 (7808.66-9019.18) | 239.88 (222.64-256277.84)            | 9491.19 (8838.42-10086.19) | 0.48 (0.45 to 0.5)    |
| High-middle                   | 86.19 (79.75-92396.6)                | 7781.68 (7221.18-8317.69) | 156.23 (145.42-166645.78)            | 8350.95 (7763.91-8901.8)   | 0.32 (0.29 to 0.34)   |
| High                          | 69.73 (64.86-74222.57)               | 7026.65 (6533.72-7475.58) | 121.95 (114.53-129214.01)            | 7364.77 (6889.24-7796.06)  | 0.12 (0.09 to 0.14)   |
| <b>21 GBD regions</b>         |                                      |                           |                                      |                            |                       |
| Central Asia                  | 4.45 (4.11-4803.7)                   | 8137.03 (7524.1-8741.66)  | 8.15 (7.51-8784.58)                  | 9524.26 (8802.23-10175.81) | 0.59 (0.53 to 0.65)   |

|    |                              |                        |                            |                           |                              |                       |
|----|------------------------------|------------------------|----------------------------|---------------------------|------------------------------|-----------------------|
| 1  |                              |                        |                            |                           |                              |                       |
| 2  |                              |                        |                            |                           |                              |                       |
| 3  |                              |                        |                            |                           |                              |                       |
| 4  |                              |                        |                            |                           |                              |                       |
| 5  |                              |                        |                            |                           |                              |                       |
| 6  | Central Europe               | 9.15 (8.44-9807.35)    | 6605.48 (6109.43-7070.96)  | 13.57 (12.65-14461.73)    | 7564.59 (7024.38-8040.5)     | 0.42 (0.4 to 0.44)    |
| 7  |                              |                        |                            |                           |                              |                       |
| 8  | Eastern Europe               | 24.38 (22.55-26323.67) | 9409.89 (8700.06-10160.11) | 30.13 (27.96-32292.36)    | 10377.83 (9616.95-11142.47)  | 0.39 (0.34 to 0.44)   |
| 9  |                              |                        |                            |                           |                              |                       |
| 10 | Australasia                  | 1.41 (1.33-1487.37)    | 6177.9 (5831.64-6510.55)   | 2.95 (2.77-3128.02)       | 6532.01 (6133.49-6925.11)    | 0.22 (0.2 to 0.23)    |
| 11 |                              |                        |                            |                           |                              |                       |
| 12 | High-income Asia Pacific     | 16.55 (15.42-17679.41) | 8433.41 (7860.45-8971.08)  | 31 (29.12-32934.31)       | 8231.15 (7714.65-8729.32)    | -0.1 (-0.12 to -0.08) |
| 13 |                              |                        |                            |                           |                              |                       |
| 14 | High-income North America    | 26.23 (24.33-28067.57) | 7750.33 (7175.26-8252.76)  | 43.98 (41.11-46803.08)    | 7982.58 (7433.75-8484.6)     | 0.03 (-0.02 to 0.08)  |
| 15 |                              |                        |                            |                           |                              |                       |
| 16 | Southern Latin America       | 2.85 (2.66-3038.14)    | 6199.61 (5786.14-6591)     | 5.72 (5.38-6077.58)       | 7174.32 (6750.95-7629.01)    | 0.54 (0.49 to 0.59)   |
| 17 |                              |                        |                            |                           |                              |                       |
| 18 | Western Europe               | 29.05 (27.04-30993.2)  | 5488.94 (5116.7-5832.82)   | 45.44 (42.65-48233.7)     | 5690.53 (5326.14-6020.93)    | 0.08 (0.06 to 0.1)    |
| 19 |                              |                        |                            |                           |                              |                       |
| 20 | Andean Latin America         | 1.76 (1.52-2061.21)    | 7004.76 (6076.38-8070.59)  | 5.32 (4.71-6069.48)       | 9101.2 (8067.32-10290.91)    | 0.93 (0.91 to 0.94)   |
| 21 |                              |                        |                            |                           |                              |                       |
| 22 | Caribbean                    | 1.97 (1.84-2108.93)    | 6840.61 (6371.07-7299.12)  | 4.29 (4.03-4568.68)       | 8457.06 (7927.23-8994.33)    | 0.74 (0.7 to 0.78)    |
| 23 |                              |                        |                            |                           |                              |                       |
| 24 | Central Latin America        | 10.31 (9.55-11027.08)  | 9865 (9168.77-10521.68)    | 29.53 (27.68-31265.59)    | 12139.27 (11377.05-12843.88) | 0.68 (0.64 to 0.71)   |
| 25 |                              |                        |                            |                           |                              |                       |
| 26 | Tropical Latin America       | 7.08 (6.58-7550.26)    | 6482.97 (6054.23-6886)     | 17.9 (16.76-18992.36)     | 7399.15 (6923.65-7835.63)    | 0.42 (0.39 to 0.45)   |
| 27 |                              |                        |                            |                           |                              |                       |
| 28 | North Africa and Middle East | 15.77 (14.73-16764.82) | 7697.07 (7182.72-8168.78)  | 49.8 (46.52-52818.54)     | 10589.67 (9930.4-11229.54)   | 1.17 (1.13 to 1.22)   |
| 29 |                              |                        |                            |                           |                              |                       |
| 30 | South Asia                   | 60.22 (55.46-65289.02) | 8186.89 (7582.95-8782.32)  | 139.51 (128.99-150327.5)  | 8847.66 (8206.45-9453.58)    | 0.11 (0.03 to 0.18)   |
| 31 |                              |                        |                            |                           |                              |                       |
| 32 | East Asia                    | 82.94 (76.25-90185.75) | 7989.69 (7377.2-8599.68)   | 156.84 (144.51-169062.38) | 8180.65 (7568.21-8798.3)     | 0.29 (0.2 to 0.37)    |
| 33 |                              |                        |                            |                           |                              |                       |
| 34 | Oceania                      | 0.36 (0.33-391.33)     | 8440.17 (7784.51-9111.81)  | 0.9 (0.82-974.96)         | 9296.4 (8596.13-9971.06)     | 0.3 (0.29 to 0.31)    |
| 35 |                              |                        |                            |                           |                              |                       |
| 36 |                              |                        |                            |                           |                              |                       |
| 37 |                              |                        |                            |                           |                              |                       |
| 38 |                              |                        |                            |                           |                              |                       |
| 39 |                              |                        |                            |                           |                              |                       |
| 40 |                              |                        |                            |                           |                              |                       |
| 41 |                              |                        |                            |                           |                              |                       |
| 42 |                              |                        |                            |                           |                              |                       |
| 43 |                              |                        |                            |                           |                              |                       |
| 44 |                              |                        |                            |                           |                              |                       |
| 45 |                              |                        |                            |                           |                              |                       |
| 46 |                              |                        |                            |                           |                              |                       |



1  
2  
3  
4  
5  
6  
7  
8  
9  
10  
11  
12  
13  
14  
15  
16  
17  
18  
19  
20  
21  
22  
23  
24  
25  
26  
27  
28  
29  
30  
31  
32  
33  
34  
35  
36  
37  
38  
39  
40  
41  
42  
43  
44  
45  
46

|                             |                        |                            |                        |                             |                     |
|-----------------------------|------------------------|----------------------------|------------------------|-----------------------------|---------------------|
| Southeast Asia              | 31.01 (28.51-33656.96) | 9351.48 (8661.82-10057.66) | 71.14 (65.94-76348.22) | 10803.4 (10057.32-11534.34) | 0.5 (0.49 to 0.52)  |
| Central Sub-Saharan Africa  | 1.69 (1.55-1841.1)     | 5306.9 (4899.19-5732.96)   | 4.52 (4.16-4907.57)    | 5867.73 (5434.29-6284.81)   | 0.36 (0.32 to 0.39) |
| Eastern Sub-Saharan Africa  | 5.54 (5.12-5997.22)    | 5254.32 (4862.09-5638.51)  | 13.92 (12.84-15065.98) | 5800.09 (5395.2-6210.24)    | 0.36 (0.33 to 0.38) |
| Southern Sub-Saharan Africa | 2.3 (2.13-2464.83)     | 6633.49 (6172.65-7075.02)  | 5.02 (4.66-5366.22)    | 7769.91 (7260.61-8261.86)   | 0.53 (0.45 to 0.61) |
| Western Sub-Saharan Africa  | 6.64 (6.16-7139.44)    | 5768.63 (5363.39-6151.96)  | 17.67 (16.4-18953.01)  | 6678.91 (6225.96-7102.83)   | 0.56 (0.52 to 0.59) |

1  
2  
3  
4  
5 **Supplemental table 2. Incidence cases and age-standardized incidence rate (ASIR) of chronic kidney disease in 1990 and 2019, and the temporal trends from**  
6 **1990 to 2019 in global and regions.**  
7  
8  
9  
10  
11  
12  
13  
14  
15  
16  
17  
18  
19  
20  
21  
22  
23  
24  
25  
26  
27  
28  
29  
30  
31  
32  
33  
34  
35  
36  
37  
38  
39  
40  
41  
42  
43  
44  
45  
46

For peer review only

| Characteristics               | 1990                                            |                                         | 2019                                            |                                         | 1990-2019             |
|-------------------------------|-------------------------------------------------|-----------------------------------------|-------------------------------------------------|-----------------------------------------|-----------------------|
|                               | Incidence cases (*10 <sup>6</sup> )<br>(95% UI) | ASIR per 100,000<br>population (95% UI) | Incidence cases (*10 <sup>6</sup> )<br>(95% UI) | ASIR per 100,000<br>population (95% UI) | EAPC of ASIR (95% CI) |
| Global                        | 7.8 (7.17-8485.39)                              | 192.45 (177.31-209.05)                  | 18.99 (17.56-20518.16)                          | 233.65 (216.56-252.31)                  | 0.69 (0.68 to 0.7)    |
| <b>Gender</b>                 |                                                 |                                         |                                                 |                                         |                       |
| Males                         | 3.36 (3.09-3.65)                                | 179.21 (164.8-194.74)                   | 8.51 (7.84-9.23)                                | 223.02 (206.07-241.18)                  | 0.69 (0.68 to 0.7)    |
| Females                       | 4.44 (4.08-4.84)                                | 203.64 (187.5-221.38)                   | 10.47 (9.7-11.32)                               | 243.63 (225.94-262.66)                  | 0.69 (0.68 to 0.7)    |
| <b>Sociodemographic index</b> |                                                 |                                         |                                                 |                                         |                       |
| Low                           | 0.37 (0.34-398.17)                              | 123.72 (114.25-133.97)                  | 1.01 (0.93-1085.2)                              | 161.24 (148.07-175.64)                  | 0.95 (0.92 to 0.99)   |
| Low-middle                    | 1.05 (0.97-1139.39)                             | 149.68 (137.38-162.87)                  | 2.81 (2.58-3056.52)                             | 197.07 (181.51-214.36)                  | 0.91 (0.87 to 0.95)   |
| Middle                        | 1.95 (1.79-2127.2)                              | 172.4 (157.74-188.79)                   | 5.87 (5.4-6373.37)                              | 235.71 (218.23-254.87)                  | 1.17 (1.14 to 1.2)    |
| High-middle                   | 1.78 (1.63-1952.09)                             | 168.37 (154.83-183.45)                  | 4.13 (3.8-4493.35)                              | 210.65 (194.34-228.37)                  | 0.89 (0.86 to 0.92)   |
| High                          | 2.64 (2.41-2883.51)                             | 252.66 (232.46-274.36)                  | 5.15 (4.75-5569.87)                             | 281.67 (260.21-303.81)                  | 0.28 (0.24 to 0.32)   |
| <b>21 GBD regions</b>         |                                                 |                                         |                                                 |                                         |                       |
| Central Asia                  | 0.07 (0.06-75.25)                               | 123.99 (113.45-135.88)                  | 0.16 (0.15-178.53)                              | 193.3 (176.73-211.27)                   | 1.69 (1.52 to 1.87)   |

|    |                              |                     |                        |                     |                        |                      |
|----|------------------------------|---------------------|------------------------|---------------------|------------------------|----------------------|
| 1  |                              |                     |                        |                     |                        |                      |
| 2  |                              |                     |                        |                     |                        |                      |
| 3  |                              |                     |                        |                     |                        |                      |
| 4  |                              |                     |                        |                     |                        |                      |
| 5  |                              |                     |                        |                     |                        |                      |
| 6  | Central Europe               | 0.21 (0.19-229.95)  | 144.36 (131.43-158.87) | 0.44 (0.4-481.17)   | 216.5 (197.99-236.75)  | 1.21 (1.12 to 1.3)   |
| 7  |                              |                     |                        |                     |                        |                      |
| 8  | Eastern Europe               | 0.34 (0.3-370.22)   | 130.48 (119.44-142.71) | 0.54 (0.49-599.18)  | 181.85 (166.07-199.03) | 1.32 (1.15 to 1.49)  |
| 9  |                              |                     |                        |                     |                        |                      |
| 10 | Australasia                  | 0.06 (0.06-65.23)   | 254.5 (240.37-269.78)  | 0.14 (0.13-153.73)  | 286.14 (264.78-308.93) | 0.37 (0.33 to 0.41)  |
| 11 |                              |                     |                        |                     |                        |                      |
| 12 | High-income Asia Pacific     | 0.53 (0.49-577.29)  | 265.13 (244.47-287.79) | 1.21 (1.11-1315.46) | 277.51 (255.67-300.82) | 0.08 (0.04 to 0.13)  |
| 13 |                              |                     |                        |                     |                        |                      |
| 14 | High-income North America    | 1.04 (0.94-1140.52) | 295.47 (270.34-323.33) | 1.89 (1.73-2062.59) | 310.44 (284.74-336.3)  | 0.03 (-0.05 to 0.12) |
| 15 |                              |                     |                        |                     |                        |                      |
| 16 | Southern Latin America       | 0.1 (0.09-106.64)   | 211.66 (193.13-230.93) | 0.23 (0.22-253.7)   | 282.02 (260.12-304.6)  | 1.02 (0.93 to 1.1)   |
| 17 |                              |                     |                        |                     |                        |                      |
| 18 | Western Europe               | 1.28 (1.16-1410.45) | 216.75 (198.62-236.36) | 2.16 (1.99-2344.51) | 235.6 (216.93-254.91)  | 0.25 (0.2 to 0.3)    |
| 19 |                              |                     |                        |                     |                        |                      |
| 20 | Andean Latin America         | 0.04 (0.03-38.3)    | 154.8 (142.57-167.62)  | 0.16 (0.15-175.89)  | 288.34 (264.91-311.21) | 2.2 (2.09 to 2.3)    |
| 21 |                              |                     |                        |                     |                        |                      |
| 22 | Caribbean                    | 0.04 (0.04-48.74)   | 161.46 (148.31-176.22) | 0.13 (0.12-141.71)  | 256.39 (237.73-277)    | 1.58 (1.48 to 1.68)  |
| 23 |                              |                     |                        |                     |                        |                      |
| 24 | Central Latin America        | 0.27 (0.25-292.01)  | 276.65 (252.64-304.54) | 0.99 (0.93-1060.8)  | 409.61 (383.06-437.91) | 1.29 (1.21 to 1.36)  |
| 25 |                              |                     |                        |                     |                        |                      |
| 26 | Tropical Latin America       | 0.19 (0.18-210.14)  | 191.28 (176.52-209.33) | 0.6 (0.56-655.92)   | 250.85 (233.24-272.18) | 0.89 (0.82 to 0.96)  |
| 27 |                              |                     |                        |                     |                        |                      |
| 28 | North Africa and Middle East | 0.51 (0.47-550.25)  | 261.9 (240.97-285.91)  | 2.03 (1.88-2202.72) | 447.48 (415.13-482.83) | 1.97 (1.87 to 2.08)  |
| 29 |                              |                     |                        |                     |                        |                      |
| 30 | South Asia                   | 1.01 (0.93-1104.53) | 148.9 (136.4-162.57)   | 2.67 (2.43-2918.85) | 181.87 (165.91-198.75) | 0.61 (0.54 to 0.68)  |
| 31 |                              |                     |                        |                     |                        |                      |
| 32 | East Asia                    | 1.33 (1.21-1465.64) | 148.49 (135.05-163.27) | 3.27 (2.98-3599.05) | 164.52 (150.62-179.18) | 0.61 (0.51 to 0.7)   |
| 33 |                              |                     |                        |                     |                        |                      |
| 34 | Oceania                      | 0 (0-5.25)          | 122.53 (112.38-133.56) | 0.01 (0.01-14.89)   | 158.68 (145.3-172.89)  | 0.79 (0.74 to 0.84)  |
| 35 |                              |                     |                        |                     |                        |                      |
| 36 |                              |                     |                        |                     |                        |                      |
| 37 |                              |                     |                        |                     |                        |                      |
| 38 |                              |                     |                        |                     |                        |                      |
| 39 |                              |                     |                        |                     |                        |                      |
| 40 |                              |                     |                        |                     |                        |                      |
| 41 |                              |                     |                        |                     |                        |                      |
| 42 |                              |                     |                        |                     |                        |                      |
| 43 |                              |                     |                        |                     |                        |                      |
| 44 |                              |                     |                        |                     |                        |                      |
| 45 |                              |                     |                        |                     |                        |                      |
| 46 |                              |                     |                        |                     |                        |                      |

1  
2  
3  
4  
5  
6  
7  
8  
9  
10  
11  
12  
13  
14  
15  
16  
17  
18  
19  
20  
21  
22  
23  
24  
25  
26  
27  
28  
29  
30  
31  
32  
33  
34  
35  
36  
37  
38  
39  
40  
41  
42  
43  
44  
45  
46

|                             |                    |                        |                     |                        |                     |
|-----------------------------|--------------------|------------------------|---------------------|------------------------|---------------------|
| Southeast Asia              | 0.45 (0.42-491.19) | 152.65 (140.55-165.93) | 1.43 (1.31-1547.89) | 227.98 (210.24-246.38) | 1.4 (1.37 to 1.44)  |
| Central Sub-Saharan Africa  | 0.03 (0.03-30.16)  | 93.07 (86.17-100.24)   | 0.08 (0.08-89.02)   | 125.99 (115.7-136.67)  | 1.11 (1.01 to 1.2)  |
| Eastern Sub-Saharan Africa  | 0.09 (0.09-99.99)  | 94.39 (87.18-102.21)   | 0.24 (0.22-258.06)  | 119.54 (109.76-130.11) | 0.86 (0.78 to 0.93) |
| Southern Sub-Saharan Africa | 0.05 (0.05-57.56)  | 168.63 (154.1-184.7)   | 0.14 (0.13-149.6)   | 231.14 (212.43-251.73) | 1.04 (0.85 to 1.23) |
| Western Sub-Saharan Africa  | 0.16 (0.15-168.99) | 137.2 (126.96-148.29)  | 0.44 (0.41-470.76)  | 181.8 (167.29-197.54)  | 1.13 (1.01 to 1.24) |

1  
2  
3  
4  
5 **Supplemental table 3. DALYs and age-standardized DALYs rate (ASR-DALYs) of chronic kidney disease in 1990 and 2019, and the temporal trends from**  
6 **1990 to 2019 in global and regions.**  
7  
8  
9  
10  
11  
12  
13  
14  
15  
16  
17  
18  
19  
20  
21  
22  
23  
24  
25  
26  
27  
28  
29  
30  
31  
32  
33  
34  
35  
36  
37  
38  
39  
40  
41  
42  
43  
44  
45  
46

For peer review only

| Characteristics               | 1990                               |                                           | 2019                               |                                           | 1990-2019                  |
|-------------------------------|------------------------------------|-------------------------------------------|------------------------------------|-------------------------------------------|----------------------------|
|                               | DALYs (*10 <sup>6</sup> ) (95% UI) | ASR-DALYs per 100,000 population (95% UI) | DALYs (*10 <sup>6</sup> ) (95% UI) | ASR-DALYs per 100,000 population (95% UI) | EAPC of ASR-DALYs (95% CI) |
| Global                        | 21.5 (20.04-23065.78)              | 484.46 (452.28-518.67)                    | 41.54 (38.29-45037.86)             | 514.86 (474.91-558.86)                    | 0.31 (0.23 to 0.38)        |
| <b>Gender</b>                 |                                    |                                           |                                    |                                           |                            |
| Males                         | 11.2 (10.4-12.15)                  | 537.61 (499.52-580.01)                    | 21.98 (20.14-23.97)                | 574.23 (527.52-625.27)                    | 0.35 (0.27 to 0.43)        |
| Females                       | 10.3 (9.46-11.22)                  | 443.69 (409.36-481.56)                    | 19.56 (17.7-21.47)                 | 463.61 (419.34-509.95)                    | 0.21 (0.15 to 0.28)        |
| <b>Sociodemographic index</b> |                                    |                                           |                                    |                                           |                            |
| Low                           | 2.45 (2.18-2728.52)                | 734.23 (667.32-804.58)                    | 4.73 (4.21-5276.93)                | 682.18 (615.56-752.04)                    | -0.24 (-0.28 to -0.21)     |
| Low-middle                    | 5.05 (4.56-5598.22)                | 649.9 (591.82-714.59)                     | 9.91 (8.98-10820.22)               | 664.18 (603.21-723.92)                    | 0.1 (0 to 0.21)            |
| Middle                        | 7.55 (7.02-8112.98)                | 601.87 (560.14-645.51)                    | 15.44 (14.17-16837.37)             | 621.93 (570.74-676.64)                    | 0.27 (0.21 to 0.33)        |
| High-middle                   | 3.89 (3.6-4213.22)                 | 360.16 (332.75-390.43)                    | 6.05 (5.49-6665.14)                | 320.68 (290.18-353.73)                    | -0.36 (-0.46 to -0.27)     |
| High                          | 2.54 (2.33-2787.23)                | 254.32 (232.26-279.43)                    | 5.38 (4.87-5884.31)                | 304.13 (274.09-335.44)                    | 0.8 (0.72 to 0.89)         |
| <b>21 GBD regions</b>         |                                    |                                           |                                    |                                           |                            |
| Central Asia                  | 0.23 (0.22-256.33)                 | 397.89 (367.64-442.65)                    | 0.43 (0.39-481.73)                 | 506.72 (456.51-562.2)                     | 0.48 (0.16 to 0.79)        |

|    |                              |                     |                        |                     |                           |                        |
|----|------------------------------|---------------------|------------------------|---------------------|---------------------------|------------------------|
| 1  |                              |                     |                        |                     |                           |                        |
| 2  |                              |                     |                        |                     |                           |                        |
| 3  |                              |                     |                        |                     |                           |                        |
| 4  |                              |                     |                        |                     |                           |                        |
| 5  |                              |                     |                        |                     |                           |                        |
| 6  | Central Europe               | 0.41 (0.38-437.53)  | 297.3 (278.39-317.88)  | 0.46 (0.4-523.54)   | 243.84 (212.01-278.04)    | -0.62 (-0.69 to -0.55) |
| 7  |                              |                     |                        |                     |                           |                        |
| 8  | Eastern Europe               | 0.49 (0.45-547.25)  | 197 (177.48-218.85)    | 0.56 (0.49-638.34)  | 196.77 (170.51-224.02)    | -0.51 (-0.73 to -0.28) |
| 9  |                              |                     |                        |                     |                           |                        |
| 10 | Australasia                  | 0.04 (0.04-48.98)   | 196.75 (180.03-215.38) | 0.1 (0.09-115.71)   | 214.3 (191.2-238.39)      | 0.45 (0.4 to 0.5)      |
| 11 |                              |                     |                        |                     |                           |                        |
| 12 | High-income Asia Pacific     | 0.59 (0.55-642.57)  | 310.61 (285.7-334.9)   | 0.96 (0.84-1067.61) | 218.58 (192.71-243.9)     | -1.16 (-1.21 to -1.1)  |
| 13 |                              |                     |                        |                     |                           |                        |
| 14 | High-income North America    | 0.93 (0.85-1032.34) | 273.54 (247.51-303.34) | 2.42 (2.22-2641.09) | 413.63 (379.73-450.68)    | 1.69 (1.51 to 1.88)    |
| 15 |                              |                     |                        |                     |                           |                        |
| 16 | Southern Latin America       | 0.23 (0.22-245.13)  | 501.82 (472.93-530.86) | 0.44 (0.41-472.11)  | 540.08 (500.88-579.63)    | 0.25 (0.02 to 0.48)    |
| 17 |                              |                     |                        |                     |                           |                        |
| 18 | Western Europe               | 1.08 (0.99-1188.03) | 197.18 (179.66-216.97) | 1.75 (1.56-1921.1)  | 186.58 (166.88-208.38)    | -0.04 (-0.09 to 0.02)  |
| 19 |                              |                     |                        |                     |                           |                        |
| 20 | Andean Latin America         | 0.18 (0.17-196.15)  | 680.42 (626.59-742.08) | 0.48 (0.4-564.87)   | 836.34 (704.25-981.59)    | 0.84 (0.59 to 1.1)     |
| 21 |                              |                     |                        |                     |                           |                        |
| 22 | Caribbean                    | 0.17 (0.16-189.99)  | 587 (541.65-647.03)    | 0.39 (0.34-454.01)  | 774.89 (668-896.08)       | 1.32 (1.22 to 1.42)    |
| 23 |                              |                     |                        |                     |                           |                        |
| 24 | Central Latin America        | 0.78 (0.72-840.29)  | 739.23 (689.04-794.6)  | 3.28 (2.92-3697.82) | 1348.14 (1203.58-1521.61) | 2.3 (2.01 to 2.59)     |
| 25 |                              |                     |                        |                     |                           |                        |
| 26 | Tropical Latin America       | 0.61 (0.58-650.99)  | 559.23 (528.14-592.5)  | 1.24 (1.15-1332.95) | 513.36 (476.05-553.4)     | -0.37 (-0.46 to -0.29) |
| 27 |                              |                     |                        |                     |                           |                        |
| 28 | North Africa and Middle East | 1.77 (1.62-1930.04) | 834.93 (762.27-947.15) | 3.38 (2.92-3897.91) | 744.36 (646.14-851.75)    | -0.37 (-0.43 to -0.31) |
| 29 |                              |                     |                        |                     |                           |                        |
| 30 | South Asia                   | 4.69 (4.05-5324.9)  | 647.1 (557.75-731.83)  | 9.89 (8.8-11052.83) | 640.65 (568.76-715.48)    | -0.06 (-0.24 to 0.11)  |
| 31 |                              |                     |                        |                     |                           |                        |
| 32 | East Asia                    | 4.2 (3.73-4664.95)  | 416.47 (371.77-461.55) | 6.21 (5.36-7049.94) | 320.44 (277.88-362.19)    | -0.58 (-0.68 to -0.48) |
| 33 |                              |                     |                        |                     |                           |                        |
| 34 | Oceania                      | 0.03 (0.02-32.15)   | 664.24 (581.19-758.07) | 0.07 (0.06-83.48)   | 747.22 (629.25-880.16)    | 0.27 (0.09 to 0.44)    |
| 35 |                              |                     |                        |                     |                           |                        |
| 36 |                              |                     |                        |                     |                           |                        |
| 37 |                              |                     |                        |                     |                           |                        |
| 38 |                              |                     |                        |                     |                           |                        |
| 39 |                              |                     |                        |                     |                           |                        |
| 40 |                              |                     |                        |                     |                           |                        |
| 41 |                              |                     |                        |                     |                           |                        |
| 42 |                              |                     |                        |                     |                           |                        |
| 43 |                              |                     |                        |                     |                           |                        |
| 44 |                              |                     |                        |                     |                           |                        |
| 45 |                              |                     |                        |                     |                           |                        |
| 46 |                              |                     |                        |                     |                           |                        |



1  
2  
3  
4  
5  
6  
7  
8  
9  
10  
11  
12  
13  
14  
15  
16  
17  
18  
19  
20  
21  
22  
23  
24  
25  
26  
27  
28  
29  
30  
31  
32  
33  
34  
35  
36  
37  
38  
39  
40  
41  
42  
43  
44  
45  
46

|                             |                     |                        |                     |                        |                        |
|-----------------------------|---------------------|------------------------|---------------------|------------------------|------------------------|
| Southeast Asia              | 2.7 (2.49-2945.17)  | 806.56 (741.95-875.79) | 5.11 (4.61-5673.54) | 796.69 (720.03-881.21) | -0.02 (-0.07 to 0.03)  |
| Central Sub-Saharan Africa  | 0.26 (0.22-303.29)  | 769.07 (656.59-891.05) | 0.46 (0.37-563.41)  | 635.98 (510.34-766.78) | -0.73 (-0.77 to -0.7)  |
| Eastern Sub-Saharan Africa  | 0.84 (0.71-949.63)  | 752.43 (668.49-837.88) | 1.4 (1.21-1581.03)  | 626.45 (557.9-698.14)  | -0.73 (-0.77 to -0.69) |
| Southern Sub-Saharan Africa | 0.22 (0.2-249.55)   | 636.93 (576.23-723.35) | 0.5 (0.45-545.96)   | 803.81 (733.62-878.51) | 0.94 (0.63 to 1.25)    |
| Western Sub-Saharan Africa  | 1.03 (0.87-1218.24) | 813.99 (702.78-957.03) | 2.01 (1.67-2371.3)  | 738.79 (627.78-857.08) | -0.27 (-0.3 to -0.23)  |

**Supplemental table 4. Deaths and age-standardized death rate (ASDR) of chronic kidney disease in 1990 and 2019, and the temporal trends from 1990 to 2019 in 204 countries.**

| location            | Death cases in 1990 (*10 <sup>3</sup> ) | ASDR in 1990 (per 100,000 population) | Death cases in 2019 (*10 <sup>3</sup> ) | ASDR in 2019 (per 100,000 population) | EAPC of ASDR from 1990 to 2019 |
|---------------------|-----------------------------------------|---------------------------------------|-----------------------------------------|---------------------------------------|--------------------------------|
| Afghanistan         | 3.71 (2.82-5.06)                        | 55.94 (42.01-81.56)                   | 5.64 (4.33-7.92)                        | 49.37 (37.14-74.78)                   | -0.33 (-0.37 to -0.28)         |
| Albania             | 0.24 (0.22-0.26)                        | 11.53 (10.65-12.4)                    | 0.33 (0.25-0.42)                        | 8.24 (6.22-10.66)                     | -1.1 (-1.34 to -0.86)          |
| Algeria             | 3.56 (2.74-4.96)                        | 38.73 (30.35-52.07)                   | 8.2 (6.35-10.89)                        | 31.57 (24.78-41.16)                   | -0.5 (-0.67 to -0.33)          |
| American Samoa      | 0.01 (0.01-0.01)                        | 40.55 (34.26-46.31)                   | 0.03 (0.02-0.03)                        | 59.34 (51.03-69)                      | 1.41 (1.28 to 1.55)            |
| Andorra             | 0 (0-0.01)                              | 11.21 (8.79-14.36)                    | 0.02 (0.01-0.02)                        | 9.86 (7.46-12.24)                     | -0.39 (-0.57 to -0.2)          |
| Angola              | 1.06 (0.76-1.34)                        | 27.03 (19.77-33.28)                   | 2.46 (1.73-3.16)                        | 24.77 (17.36-31.37)                   | -0.37 (-0.42 to -0.33)         |
| Antigua and Barbuda | 0.01 (0.01-0.02)                        | 26.3 (23.81-28.66)                    | 0.04 (0.03-0.04)                        | 39.05 (33.55-45.31)                   | 1.69 (1.48 to 1.91)            |
| Argentina           | 7.13 (6.72-7.54)                        | 23.49 (22.02-24.9)                    | 15.66 (14.21-17.05)                     | 28.36 (25.83-30.9)                    | 0.57 (0.27 to 0.88)            |
| Armenia             | 0.07 (0.06-0.07)                        | 3.03 (2.76-3.3)                       | 0.45 (0.38-0.52)                        | 11.35 (9.53-13.22)                    | 4.65 (4.33 to 4.97)            |
| Australia           | 1.71 (1.56-1.83)                        | 9.49 (8.57-10.15)                     | 5.21 (4.29-5.89)                        | 10.75 (9.03-12.08)                    | 0.62 (0.51 to 0.74)            |

|    |                                  |                  |                     |                     |                     |                        |
|----|----------------------------------|------------------|---------------------|---------------------|---------------------|------------------------|
| 1  |                                  |                  |                     |                     |                     |                        |
| 2  |                                  |                  |                     |                     |                     |                        |
| 3  |                                  |                  |                     |                     |                     |                        |
| 4  |                                  |                  |                     |                     |                     |                        |
| 5  | Austria                          | 0.74 (0.68-0.79) | 6.13 (5.62-6.53)    | 3.37 (2.86-3.73)    | 14.87 (12.79-16.36) | 4.46 (3.94 to 4.98)    |
| 6  |                                  |                  |                     |                     |                     |                        |
| 7  |                                  |                  |                     |                     |                     |                        |
| 8  | Azerbaijan                       | 0.53 (0.47-0.59) | 9.6 (8.55-10.9)     | 1.39 (1.16-1.63)    | 17.85 (14.56-20.65) | 2.69 (2.23 to 3.16)    |
| 9  |                                  |                  |                     |                     |                     |                        |
| 10 | Bahamas                          | 0.04 (0.03-0.04) | 24.48 (22.11-26.99) | 0.11 (0.09-0.14)    | 30.35 (24.98-36.57) | 1.14 (0.98 to 1.3)     |
| 11 |                                  |                  |                     |                     |                     |                        |
| 12 |                                  |                  |                     |                     |                     |                        |
| 13 | Bahrain                          | 0.04 (0.04-0.05) | 38.45 (31.97-46.81) | 0.18 (0.14-0.22)    | 34.82 (27.94-42.19) | -0.09 (-0.63 to 0.45)  |
| 14 |                                  |                  |                     |                     |                     |                        |
| 15 |                                  |                  |                     |                     |                     |                        |
| 16 | Bangladesh                       | 7.7 (5.05-9.75)  | 13.66 (10.12-16.55) | 12.78 (10.18-15.68) | 10.9 (8.74-13.31)   | -0.56 (-0.91 to -0.2)  |
| 17 |                                  |                  |                     |                     |                     |                        |
| 18 | Barbados                         | 0.05 (0.05-0.06) | 18.45 (17.07-19.95) | 0.12 (0.1-0.14)     | 25.66 (21.37-30.06) | 1.14 (0.93 to 1.35)    |
| 19 |                                  |                  |                     |                     |                     |                        |
| 20 |                                  |                  |                     |                     |                     |                        |
| 21 | Belarus                          | 0.28 (0.26-0.29) | 2.32 (2.15-2.46)    | 0.5 (0.4-0.62)      | 3.2 (2.57-3.97)     | 1.48 (0.93 to 2.04)    |
| 22 |                                  |                  |                     |                     |                     |                        |
| 23 | Belgium                          | 1.42 (1.3-1.53)  | 9.13 (8.31-9.81)    | 2.96 (2.5-3.34)     | 9.89 (8.49-11.03)   | 0.38 (0.28 to 0.48)    |
| 24 |                                  |                  |                     |                     |                     |                        |
| 25 |                                  |                  |                     |                     |                     |                        |
| 26 | Belize                           | 0.02 (0.02-0.02) | 22.74 (20.41-25.07) | 0.11 (0.1-0.13)     | 40.49 (35.02-46.66) | 2.2 (1.72 to 2.69)     |
| 27 |                                  |                  |                     |                     |                     |                        |
| 28 |                                  |                  |                     |                     |                     |                        |
| 29 | Benin                            | 0.75 (0.64-0.87) | 35.15 (30.27-40.77) | 1.58 (1.19-2.06)    | 32.41 (25.19-40.64) | -0.15 (-0.23 to -0.07) |
| 30 |                                  |                  |                     |                     |                     |                        |
| 31 | Bermuda                          | 0.01 (0.01-0.01) | 16.94 (15.52-18.34) | 0.02 (0.02-0.02)    | 14.55 (12.11-17.38) | -0.18 (-0.35 to -0.01) |
| 32 |                                  |                  |                     |                     |                     |                        |
| 33 |                                  |                  |                     |                     |                     |                        |
| 34 | Bhutan                           | 0.06 (0.04-0.08) | 22.36 (14.86-31.31) | 0.15 (0.1-0.19)     | 28.1 (20.41-35.31)  | 0.86 (0.81 to 0.91)    |
| 35 |                                  |                  |                     |                     |                     |                        |
| 36 | Bolivia (Plurinational State of) | 1.23 (1.02-1.52) | 39.15 (32.12-49.14) | 4.42 (3.41-5.56)    | 55.89 (43.24-69.91) | 1.3 (1.23 to 1.38)     |
| 37 |                                  |                  |                     |                     |                     |                        |
| 38 |                                  |                  |                     |                     |                     |                        |
| 39 |                                  |                  |                     |                     |                     |                        |
| 40 |                                  |                  |                     |                     |                     |                        |
| 41 |                                  |                  |                     |                     |                     |                        |
| 42 |                                  |                  |                     |                     |                     |                        |
| 43 |                                  |                  |                     |                     |                     |                        |
| 44 |                                  |                  |                     |                     |                     |                        |
| 45 |                                  |                  |                     |                     |                     |                        |
| 46 |                                  |                  |                     |                     |                     |                        |

|    |                          |                    |                     |                     |                     |                        |
|----|--------------------------|--------------------|---------------------|---------------------|---------------------|------------------------|
| 1  |                          |                    |                     |                     |                     |                        |
| 2  |                          |                    |                     |                     |                     |                        |
| 3  |                          |                    |                     |                     |                     |                        |
| 4  |                          |                    |                     |                     |                     |                        |
| 5  | Bosnia and Herzegovina   | 0.34 (0.32-0.36)   | 9.3 (8.68-9.91)     | 0.66 (0.53-0.8)     | 11.56 (9.29-14.09)  | 0.8 (0.55 to 1.05)     |
| 6  |                          |                    |                     |                     |                     |                        |
| 7  |                          |                    |                     |                     |                     |                        |
| 8  | Botswana                 | 0.14 (0.1-0.19)    | 27.26 (20.38-37.49) | 0.44 (0.31-0.61)    | 37.05 (26.41-49.7)  | 0.64 (0.29 to 0.99)    |
| 9  |                          |                    |                     |                     |                     |                        |
| 10 | Brazil                   | 16.25 (15.53-16.8) | 19.48 (18.27-20.26) | 42.34 (38.66-44.67) | 18.6 (16.9-19.66)   | -0.09 (-0.17 to -0.02) |
| 11 |                          |                    |                     |                     |                     |                        |
| 12 |                          |                    |                     |                     |                     |                        |
| 13 | Brunei Darussalam        | 0.03 (0.03-0.03)   | 36.65 (32.22-41.02) | 0.08 (0.07-0.09)    | 37 (32.83-41.35)    | 0.74 (0.49 to 0.99)    |
| 14 |                          |                    |                     |                     |                     |                        |
| 15 |                          |                    |                     |                     |                     |                        |
| 16 | Bulgaria                 | 0.75 (0.7-0.79)    | 6.89 (6.49-7.29)    | 1.95 (1.58-2.38)    | 14.23 (11.57-17.43) | 2.68 (2.32 to 3.05)    |
| 17 |                          |                    |                     |                     |                     |                        |
| 18 | Burkina Faso             | 1.25 (1.03-1.48)   | 30.19 (25.23-35.72) | 2.82 (2.28-3.4)     | 30.98 (25.71-36.7)  | 0.03 (-0.07 to 0.13)   |
| 19 |                          |                    |                     |                     |                     |                        |
| 20 |                          |                    |                     |                     |                     |                        |
| 21 | Burundi                  | 0.74 (0.58-0.94)   | 31.09 (24.22-39.09) | 1.04 (0.81-1.33)    | 25.11 (19.84-31.23) | -1 (-1.1 to -0.9)      |
| 22 |                          |                    |                     |                     |                     |                        |
| 23 |                          |                    |                     |                     |                     |                        |
| 24 | Cabo Verde               | 0.04 (0.03-0.04)   | 15.38 (13.65-18.09) | 0.1 (0.09-0.12)     | 24.42 (21.5-27.42)  | 0.8 (0.48 to 1.12)     |
| 25 |                          |                    |                     |                     |                     |                        |
| 26 | Cambodia                 | 1.17 (0.97-1.38)   | 23.11 (19.27-27.26) | 2.19 (1.77-2.6)     | 19.77 (16.16-22.88) | -0.64 (-0.73 to -0.56) |
| 27 |                          |                    |                     |                     |                     |                        |
| 28 |                          |                    |                     |                     |                     |                        |
| 29 | Cameroon                 | 1.93 (1.49-2.38)   | 46.32 (35.64-56.56) | 4.78 (3.53-6.3)     | 42.01 (31.74-53.82) | -0.29 (-0.36 to -0.22) |
| 30 |                          |                    |                     |                     |                     |                        |
| 31 | Canada                   | 2.64 (2.38-2.83)   | 8.44 (7.58-9.05)    | 7.5 (6.43-8.41)     | 9.67 (8.4-10.78)    | 0.22 (0.1 to 0.34)     |
| 32 |                          |                    |                     |                     |                     |                        |
| 33 |                          |                    |                     |                     |                     |                        |
| 34 | Central African Republic | 0.36 (0.27-0.45)   | 31.47 (23.87-38.91) | 0.65 (0.48-0.86)    | 31.44 (23.07-40.76) | 0.05 (-0.07 to 0.16)   |
| 35 |                          |                    |                     |                     |                     |                        |
| 36 | Chad                     | 0.92 (0.71-1.28)   | 31.71 (24.21-44.14) | 1.82 (1.36-2.4)     | 31.47 (24.21-40.94) | 0.04 (-0.05 to 0.14)   |
| 37 |                          |                    |                     |                     |                     |                        |
| 38 |                          |                    |                     |                     |                     |                        |
| 39 |                          |                    |                     |                     |                     |                        |
| 40 |                          |                    |                     |                     |                     |                        |
| 41 |                          |                    |                     |                     |                     |                        |
| 42 |                          |                    |                     |                     |                     |                        |
| 43 |                          |                    |                     |                     |                     |                        |
| 44 |                          |                    |                     |                     |                     |                        |
| 45 |                          |                    |                     |                     |                     |                        |
| 46 |                          |                    |                     |                     |                     |                        |

1  
2  
3  
4  
5  
6  
7  
8  
9  
10  
11  
12  
13  
14  
15  
16  
17  
18  
19  
20  
21  
22  
23  
24  
25  
26  
27  
28  
29  
30  
31  
32  
33  
34  
35  
36  
37  
38  
39  
40  
41  
42  
43  
44  
45  
46

|                                       |                     |                     |                        |                     |                        |
|---------------------------------------|---------------------|---------------------|------------------------|---------------------|------------------------|
| Chile                                 | 1.35 (1.28-1.42)    | 15.12 (14.14-15.91) | 5.04 (4.47-5.49)       | 21.2 (18.81-23.09)  | 1.54 (1.18 to 1.91)    |
| China                                 | 98.61 (86.8-111.08) | 12.98 (11.52-14.53) | 196.73 (168.24-224.68) | 11.23 (9.63-12.77)  | -0.21 (-0.32 to -0.09) |
| Colombia                              | 3.56 (3.35-3.74)    | 21.24 (19.51-22.52) | 9.5 (7.33-11.97)       | 17.48 (13.59-22.1)  | -0.65 (-0.81 to -0.5)  |
| Comoros                               | 0.06 (0.04-0.08)    | 28.88 (19.76-36.55) | 0.12 (0.1-0.14)        | 26.32 (22.01-31.51) | -0.51 (-0.64 to -0.38) |
| Congo                                 | 0.37 (0.26-0.46)    | 36.99 (26.02-46.61) | 0.7 (0.48-0.92)        | 31.9 (21.82-40.63)  | -0.68 (-0.79 to -0.56) |
| Cook Islands                          | 0 (0-0)             | 23.6 (19.81-27.56)  | 0.01 (0.01-0.01)       | 29.72 (24.86-35)    | 0.99 (0.9 to 1.07)     |
| Costa Rica                            | 0.26 (0.24-0.27)    | 14.97 (13.7-16.1)   | 1.37 (1.08-1.71)       | 26.61 (20.83-33.09) | 1.89 (1.41 to 2.37)    |
| Croatia                               | 0.43 (0.39-0.46)    | 7.27 (6.69-7.85)    | 0.92 (0.74-1.14)       | 9.7 (7.84-11.9)     | 0.93 (0.56 to 1.3)     |
| Cuba                                  | 0.82 (0.77-0.86)    | 7.98 (7.53-8.38)    | 2.73 (2.24-3.32)       | 14.43 (11.8-17.53)  | 2.61 (2.35 to 2.86)    |
| Cyprus                                | 0.18 (0.16-0.21)    | 33.7 (29.01-39.16)  | 0.33 (0.29-0.38)       | 20.62 (17.88-23.26) | -2.01 (-2.19 to -1.83) |
| Czechia                               | 1.08 (1.03-1.13)    | 8.09 (7.7-8.44)     | 1.32 (1.07-1.56)       | 6 (4.88-7.14)       | -0.94 (-1.08 to -0.8)  |
| Democratic People's Republic of Korea | 2.38 (1.86-2.97)    | 15.72 (12.48-19.16) | 4.32 (3.51-5.28)       | 14.24 (11.58-17.26) | -0.28 (-0.41 to -0.14) |
| Democratic Republic of the Congo      | 4.42 (3.69-5.24)    | 30.47 (25.83-35.58) | 8.03 (6.4-9.93)        | 24.79 (19.49-30.7)  | -0.81 (-0.85 to -0.77) |

|    |                    |                  |                     |                     |                     |                       |
|----|--------------------|------------------|---------------------|---------------------|---------------------|-----------------------|
| 1  |                    |                  |                     |                     |                     |                       |
| 2  |                    |                  |                     |                     |                     |                       |
| 3  |                    |                  |                     |                     |                     |                       |
| 4  |                    |                  |                     |                     |                     |                       |
| 5  | Denmark            | 0.37 (0.34-0.4)  | 4.43 (4.05-4.75)    | 1.13 (0.98-1.26)    | 8.8 (7.65-9.71)     | 2.37 (1.93 to 2.8)    |
| 6  |                    |                  |                     |                     |                     |                       |
| 7  |                    |                  |                     |                     |                     |                       |
| 8  | Djibouti           | 0.03 (0.02-0.04) | 23.64 (17.63-30.82) | 0.14 (0.1-0.18)     | 28.41 (22.57-36.87) | 0.58 (0.48 to 0.68)   |
| 9  |                    |                  |                     |                     |                     |                       |
| 10 | Dominica           | 0.03 (0.02-0.03) | 35.66 (32.01-39.51) | 0.04 (0.04-0.05)    | 48.01 (39.68-57.88) | 1.35 (1.23 to 1.47)   |
| 11 |                    |                  |                     |                     |                     |                       |
| 12 |                    |                  |                     |                     |                     |                       |
| 13 | Dominican Republic | 0.58 (0.52-0.65) | 15.07 (13.33-16.88) | 2.28 (1.69-3.04)    | 24.98 (18.71-33.09) | 2.79 (2.47 to 3.12)   |
| 14 |                    |                  |                     |                     |                     |                       |
| 15 | Ecuador            | 1.09 (1.02-1.15) | 20.77 (19.27-22.14) | 6.91 (5.55-8.62)    | 50.48 (40.61-62.49) | 3.43 (2.76 to 4.11)   |
| 16 |                    |                  |                     |                     |                     |                       |
| 17 |                    |                  |                     |                     |                     |                       |
| 18 | Egypt              | 9.72 (6.8-11.83) | 39.39 (27.32-49.32) | 21.98 (12.86-31.56) | 43.93 (26.96-61.79) | 0.54 (0.44 to 0.64)   |
| 19 |                    |                  |                     |                     |                     |                       |
| 20 |                    |                  |                     |                     |                     |                       |
| 21 | El Salvador        | 0.62 (0.58-0.67) | 20.12 (18.68-21.65) | 4.08 (3.09-5.23)    | 67.31 (50.85-86.63) | 4.43 (3.7 to 5.16)    |
| 22 |                    |                  |                     |                     |                     |                       |
| 23 | Equatorial Guinea  | 0.06 (0.04-0.07) | 29.32 (21.77-37.03) | 0.14 (0.1-0.19)     | 32.78 (23.73-43.75) | 0.54 (0.39 to 0.69)   |
| 24 |                    |                  |                     |                     |                     |                       |
| 25 |                    |                  |                     |                     |                     |                       |
| 26 | Eritrea            | 0.25 (0.17-0.34) | 24.73 (15.94-35.35) | 0.66 (0.45-0.92)    | 27.87 (19.48-38.08) | 0.3 (0.14 to 0.46)    |
| 27 |                    |                  |                     |                     |                     |                       |
| 28 |                    |                  |                     |                     |                     |                       |
| 29 | Estonia            | 0.05 (0.05-0.06) | 2.72 (2.52-2.94)    | 0.35 (0.28-0.43)    | 11.33 (9.07-13.93)  | 5.36 (4.91 to 5.81)   |
| 30 |                    |                  |                     |                     |                     |                       |
| 31 | Eswatini           | 0.1 (0.08-0.13)  | 37.13 (29.77-45.05) | 0.27 (0.19-0.36)    | 51.29 (37.88-66.11) | 1.28 (0.67 to 1.89)   |
| 32 |                    |                  |                     |                     |                     |                       |
| 33 |                    |                  |                     |                     |                     |                       |
| 34 | Ethiopia           | 7.86 (6.41-9.38) | 39.59 (32.49-46.12) | 9.86 (8.58-11.29)   | 26.17 (22.48-30.08) | -1.62 (-1.7 to -1.55) |
| 35 |                    |                  |                     |                     |                     |                       |
| 36 | Fiji               | 0.12 (0.09-0.14) | 34.34 (28.19-43.41) | 0.29 (0.23-0.37)    | 46.74 (37.81-57.1)  | 0.55 (0.17 to 0.93)   |
| 37 |                    |                  |                     |                     |                     |                       |
| 38 |                    |                  |                     |                     |                     |                       |
| 39 |                    |                  |                     |                     |                     |                       |
| 40 |                    |                  |                     |                     |                     |                       |
| 41 |                    |                  |                     |                     |                     |                       |
| 42 |                    |                  |                     |                     |                     |                       |
| 43 |                    |                  |                     |                     |                     |                       |
| 44 |                    |                  |                     |                     |                     |                       |
| 45 |                    |                  |                     |                     |                     |                       |
| 46 |                    |                  |                     |                     |                     |                       |

|    |           |                  |                     |                     |                     |                        |
|----|-----------|------------------|---------------------|---------------------|---------------------|------------------------|
| 1  |           |                  |                     |                     |                     |                        |
| 2  |           |                  |                     |                     |                     |                        |
| 3  |           |                  |                     |                     |                     |                        |
| 4  |           |                  |                     |                     |                     |                        |
| 5  | Finland   | 0.21 (0.2-0.23)  | 3.08 (2.8-3.3)      | 0.71 (0.59-0.79)    | 4.69 (4.01-5.26)    | 2.13 (1.9 to 2.37)     |
| 6  |           |                  |                     |                     |                     |                        |
| 7  |           |                  |                     |                     |                     |                        |
| 8  | France    | 7.12 (6.35-7.72) | 7.99 (7.12-8.64)    | 12.7 (10.29-14.62)  | 6.59 (5.48-7.46)    | -0.39 (-0.52 to -0.26) |
| 9  |           |                  |                     |                     |                     |                        |
| 10 | Gabon     | 0.18 (0.13-0.23) | 35.51 (25.47-44.37) | 0.37 (0.23-0.48)    | 41.2 (25.46-53.69)  | 0.46 (0.25 to 0.67)    |
| 11 |           |                  |                     |                     |                     |                        |
| 12 |           |                  |                     |                     |                     |                        |
| 13 | Gambia    | 0.11 (0.08-0.14) | 31.8 (25.23-39.71)  | 0.31 (0.24-0.39)    | 33.3 (27.05-40.97)  | 0.1 (-0.01 to 0.22)    |
| 14 |           |                  |                     |                     |                     |                        |
| 15 | Georgia   | 0.35 (0.31-0.39) | 6.2 (5.54-6.88)     | 0.71 (0.59-0.82)    | 11.89 (9.98-13.83)  | 3.59 (2.83 to 4.35)    |
| 16 |           |                  |                     |                     |                     |                        |
| 17 |           |                  |                     |                     |                     |                        |
| 18 | Germany   | 9.35 (8.69-9.9)  | 7.04 (6.55-7.43)    | 35.22 (30.38-39.03) | 14.7 (12.69-16.19)  | 3.54 (3.2 to 3.89)     |
| 19 |           |                  |                     |                     |                     |                        |
| 20 |           |                  |                     |                     |                     |                        |
| 21 | Ghana     | 1.66 (1.25-2.22) | 27.97 (21.27-36.97) | 4.68 (3.38-5.96)    | 31.79 (23.14-39.85) | 0.55 (0.44 to 0.66)    |
| 22 |           |                  |                     |                     |                     |                        |
| 23 | Greece    | 2.95 (2.71-3.17) | 20.63 (18.81-22.08) | 4.6 (4.02-5.09)     | 14.96 (13.36-16.41) | -1.62 (-2.08 to -1.16) |
| 24 |           |                  |                     |                     |                     |                        |
| 25 |           |                  |                     |                     |                     |                        |
| 26 | Greenland | 0 (0-0)          | 13.2 (11.48-15.22)  | 0.01 (0.01-0.01)    | 13.87 (11.51-16.31) | 0.22 (0.11 to 0.34)    |
| 27 |           |                  |                     |                     |                     |                        |
| 28 |           |                  |                     |                     |                     |                        |
| 29 | Grenada   | 0.03 (0.02-0.03) | 34.89 (31.52-38.34) | 0.05 (0.04-0.06)    | 47.49 (41.83-52.74) | 1.47 (1.3 to 1.64)     |
| 30 |           |                  |                     |                     |                     |                        |
| 31 | Guam      | 0.01 (0.01-0.02) | 24.88 (21.94-27.8)  | 0.06 (0.05-0.07)    | 29.97 (25.2-35.61)  | 0.9 (0.61 to 1.19)     |
| 32 |           |                  |                     |                     |                     |                        |
| 33 |           |                  |                     |                     |                     |                        |
| 34 | Guatemala | 1.14 (1.02-1.27) | 32.23 (28.9-35.79)  | 6.02 (4.81-7.5)     | 57.06 (46.4-70.3)   | 2.65 (2.29 to 3.01)    |
| 35 |           |                  |                     |                     |                     |                        |
| 36 | Guinea    | 1.25 (1.01-1.59) | 37.28 (30.01-47.69) | 1.93 (1.51-2.42)    | 34.24 (27.19-42.48) | -0.1 (-0.17 to -0.02)  |
| 37 |           |                  |                     |                     |                     |                        |
| 38 |           |                  |                     |                     |                     |                        |
| 39 |           |                  |                     |                     |                     |                        |
| 40 |           |                  |                     |                     |                     |                        |
| 41 |           |                  |                     |                     |                     |                        |
| 42 |           |                  |                     |                     |                     |                        |
| 43 |           |                  |                     |                     |                     |                        |
| 44 |           |                  |                     |                     |                     |                        |
| 45 |           |                  |                     |                     |                     |                        |
| 46 |           |                  |                     |                     |                     |                        |

|    |                            |                      |                     |                        |                     |                        |
|----|----------------------------|----------------------|---------------------|------------------------|---------------------|------------------------|
| 1  |                            |                      |                     |                        |                     |                        |
| 2  |                            |                      |                     |                        |                     |                        |
| 3  |                            |                      |                     |                        |                     |                        |
| 4  |                            |                      |                     |                        |                     |                        |
| 5  | Guinea-Bissau              | 0.21 (0.17-0.27)     | 50.78 (40.95-61.44) | 0.29 (0.23-0.36)       | 40.52 (32.1-49.72)  | -0.74 (-0.78 to -0.7)  |
| 6  |                            |                      |                     |                        |                     |                        |
| 7  |                            |                      |                     |                        |                     |                        |
| 8  | Guyana                     | 0.11 (0.1-0.13)      | 29.17 (25.4-33.04)  | 0.28 (0.22-0.36)       | 47.17 (37.07-58.98) | 2.38 (2.15 to 2.61)    |
| 9  |                            |                      |                     |                        |                     |                        |
| 10 | Haiti                      | 1.18 (0.91-1.64)     | 34.39 (26-50.81)    | 2.37 (1.67-3.61)       | 34.33 (24.49-52.97) | 0.32 (0.18 to 0.47)    |
| 11 |                            |                      |                     |                        |                     |                        |
| 12 |                            |                      |                     |                        |                     |                        |
| 13 | Honduras                   | 0.56 (0.45-0.78)     | 26.05 (20.21-38.44) | 3.16 (2.57-4.03)       | 55.87 (45.6-71.19)  | 3.09 (2.81 to 3.37)    |
| 14 |                            |                      |                     |                        |                     |                        |
| 15 | Hungary                    | 0.78 (0.74-0.82)     | 5.84 (5.51-6.11)    | 1.82 (1.52-2.17)       | 8.92 (7.43-10.6)    | 2.57 (2.18 to 2.97)    |
| 16 |                            |                      |                     |                        |                     |                        |
| 17 |                            |                      |                     |                        |                     |                        |
| 18 | Iceland                    | 0.01 (0.01-0.01)     | 4.19 (3.74-4.58)    | 0.03 (0.03-0.04)       | 4.98 (4.14-5.69)    | 0.89 (0.75 to 1.03)    |
| 19 |                            |                      |                     |                        |                     |                        |
| 20 |                            |                      |                     |                        |                     |                        |
| 21 | India                      | 92.81 (79.36-104.72) | 22.76 (19.35-25.79) | 222.92 (191.55-258.59) | 20.92 (17.98-24.08) | -0.55 (-0.77 to -0.33) |
| 22 |                            |                      |                     |                        |                     |                        |
| 23 | Indonesia                  | 22.38 (20.04-24.93)  | 21.08 (18.79-23.69) | 42.13 (35.88-48.3)     | 20.95 (17.92-23.36) | 0 (-0.13 to 0.12)      |
| 24 |                            |                      |                     |                        |                     |                        |
| 25 |                            |                      |                     |                        |                     |                        |
| 26 | Iran (Islamic Republic of) | 5.27 (4.82-5.77)     | 24.11 (21.79-28.8)  | 12.55 (11.38-13.41)    | 19.77 (17.77-21.21) | -0.89 (-0.98 to -0.79) |
| 27 |                            |                      |                     |                        |                     |                        |
| 28 |                            |                      |                     |                        |                     |                        |
| 29 | Iraq                       | 3.46 (2.82-4.48)     | 46.27 (37.12-61.87) | 7.89 (6.16-10.08)      | 41.86 (33.19-53.49) | -0.42 (-0.48 to -0.35) |
| 30 |                            |                      |                     |                        |                     |                        |
| 31 | Ireland                    | 0.42 (0.39-0.44)     | 10.95 (10.02-11.65) | 0.7 (0.59-0.79)        | 8.89 (7.57-9.94)    | -0.71 (-0.79 to -0.64) |
| 32 |                            |                      |                     |                        |                     |                        |
| 33 |                            |                      |                     |                        |                     |                        |
| 34 | Israel                     | 0.96 (0.88-1.02)     | 21.9 (19.96-23.41)  | 2.76 (2.37-3.06)       | 21.48 (18.66-23.71) | 0.28 (-0.04 to 0.6)    |
| 35 |                            |                      |                     |                        |                     |                        |
| 36 | Italy                      | 8.39 (7.89-8.68)     | 9.78 (9.09-10.16)   | 16.51 (13.88-18.05)    | 8.6 (7.37-9.33)     | -0.17 (-0.31 to -0.04) |
| 37 |                            |                      |                     |                        |                     |                        |
| 38 |                            |                      |                     |                        |                     |                        |
| 39 |                            |                      |                     |                        |                     |                        |
| 40 |                            |                      |                     |                        |                     |                        |
| 41 |                            |                      |                     |                        |                     |                        |
| 42 |                            |                      |                     |                        |                     |                        |
| 43 |                            |                      |                     |                        |                     |                        |
| 44 |                            |                      |                     |                        |                     |                        |
| 45 |                            |                      |                     |                        |                     |                        |
| 46 |                            |                      |                     |                        |                     |                        |



|    |                                  |                     |                     |                     |                     |                        |
|----|----------------------------------|---------------------|---------------------|---------------------|---------------------|------------------------|
| 1  |                                  |                     |                     |                     |                     |                        |
| 2  |                                  |                     |                     |                     |                     |                        |
| 3  |                                  |                     |                     |                     |                     |                        |
| 4  |                                  |                     |                     |                     |                     |                        |
| 5  | Ivory Coast                      | 1.57 (1.27-1.87)    | 40.34 (33.8-47.23)  | 3.43 (2.59-4.33)    | 34.73 (28.03-42.22) | -0.61 (-0.73 to -0.49) |
| 6  |                                  |                     |                     |                     |                     |                        |
| 7  |                                  |                     |                     |                     |                     |                        |
| 8  | Jamaica                          | 0.43 (0.39-0.46)    | 23.34 (21.34-24.93) | 0.94 (0.76-1.15)    | 30.23 (24.24-37.39) | 0.3 (-0.21 to 0.82)    |
| 9  |                                  |                     |                     |                     |                     |                        |
| 10 | Japan                            | 19.48 (17.92-20.33) | 12.85 (11.7-13.48)  | 45.32 (35.35-51.15) | 8.87 (7.24-9.83)    | -1.44 (-1.54 to -1.34) |
| 11 |                                  |                     |                     |                     |                     |                        |
| 12 |                                  |                     |                     |                     |                     |                        |
| 13 | Jordan                           | 0.44 (0.37-0.51)    | 40.92 (34.47-48.38) | 1.81 (1.52-2.15)    | 36.65 (30.74-43.21) | -0.28 (-0.4 to -0.15)  |
| 14 |                                  |                     |                     |                     |                     |                        |
| 15 |                                  |                     |                     |                     |                     |                        |
| 16 | Kazakhstan                       | 0.97 (0.91-1.05)    | 7.34 (6.89-7.89)    | 1.87 (1.64-2.13)    | 11.79 (10.31-13.3)  | 1.12 (0.79 to 1.45)    |
| 17 |                                  |                     |                     |                     |                     |                        |
| 18 | Kenya                            | 1.62 (1.36-1.94)    | 20.91 (17.39-25.31) | 4.76 (3.99-5.64)    | 25.35 (21.47-29.6)  | 0.75 (0.67 to 0.82)    |
| 19 |                                  |                     |                     |                     |                     |                        |
| 20 |                                  |                     |                     |                     |                     |                        |
| 21 | Kiribati                         | 0.02 (0.01-0.02)    | 44.1 (36.16-52.87)  | 0.04 (0.03-0.05)    | 56.87 (43.53-72.81) | 0.6 (0.19 to 1.02)     |
| 22 |                                  |                     |                     |                     |                     |                        |
| 23 |                                  |                     |                     |                     |                     |                        |
| 24 | Kuwait                           | 0.14 (0.12-0.15)    | 27.67 (23.81-30.52) | 0.32 (0.27-0.39)    | 16.18 (13.28-19.5)  | -2.21 (-2.93 to -1.48) |
| 25 |                                  |                     |                     |                     |                     |                        |
| 26 | Kyrgyzstan                       | 0.43 (0.39-0.47)    | 12.46 (11.34-13.65) | 0.49 (0.42-0.56)    | 9.8 (8.54-11.16)    | -1.37 (-1.82 to -0.93) |
| 27 |                                  |                     |                     |                     |                     |                        |
| 28 |                                  |                     |                     |                     |                     |                        |
| 29 | Lao People's Democratic Republic | 1.08 (0.85-1.35)    | 50.84 (39.68-64.92) | 1.71 (1.31-2.18)    | 41.81 (32.97-51.98) | -0.85 (-0.92 to -0.78) |
| 30 |                                  |                     |                     |                     |                     |                        |
| 31 | Latvia                           | 0.08 (0.07-0.08)    | 2.33 (2.17-2.5)     | 0.26 (0.22-0.32)    | 6.22 (5.25-7.5)     | 4.52 (4 to 5.05)       |
| 32 |                                  |                     |                     |                     |                     |                        |
| 33 |                                  |                     |                     |                     |                     |                        |
| 34 | Lebanon                          | 0.62 (0.52-0.75)    | 32.44 (27.01-39.57) | 1.18 (0.85-1.53)    | 23.32 (16.78-30.26) | -1.11 (-1.25 to -0.97) |
| 35 |                                  |                     |                     |                     |                     |                        |
| 36 | Lesotho                          | 0.22 (0.18-0.28)    | 24.49 (20.02-29.91) | 0.56 (0.4-0.73)     | 49.32 (35.95-62.73) | 3.04 (2.73 to 3.35)    |
| 37 |                                  |                     |                     |                     |                     |                        |
| 38 |                                  |                     |                     |                     |                     |                        |
| 39 |                                  |                     |                     |                     |                     |                        |
| 40 |                                  |                     |                     |                     |                     |                        |
| 41 |                                  |                     |                     |                     |                     |                        |
| 42 |                                  |                     |                     |                     |                     |                        |
| 43 |                                  |                     |                     |                     |                     |                        |
| 44 |                                  |                     |                     |                     |                     |                        |
| 45 |                                  |                     |                     |                     |                     |                        |
| 46 |                                  |                     |                     |                     |                     |                        |

|    |                  |                  |                     |                  |                     |                        |
|----|------------------|------------------|---------------------|------------------|---------------------|------------------------|
| 1  |                  |                  |                     |                  |                     |                        |
| 2  |                  |                  |                     |                  |                     |                        |
| 3  |                  |                  |                     |                  |                     |                        |
| 4  |                  |                  |                     |                  |                     |                        |
| 5  | Liberia          | 0.45 (0.37-0.55) | 41.82 (35.14-51.43) | 0.65 (0.47-0.9)  | 33.14 (25.24-45.08) | -0.58 (-0.85 to -0.32) |
| 6  |                  |                  |                     |                  |                     |                        |
| 7  |                  |                  |                     |                  |                     |                        |
| 8  | Libya            | 0.52 (0.4-0.66)  | 29.75 (22.44-39.08) | 1.37 (0.92-1.86) | 30.37 (20.49-41.27) | 0.33 (0.15 to 0.5)     |
| 9  |                  |                  |                     |                  |                     |                        |
| 10 | Lithuania        | 0.12 (0.11-0.12) | 2.66 (2.46-2.84)    | 0.26 (0.22-0.31) | 4.37 (3.64-5.24)    | 1.2 (0.62 to 1.78)     |
| 11 |                  |                  |                     |                  |                     |                        |
| 12 |                  |                  |                     |                  |                     |                        |
| 13 | Luxembourg       | 0.05 (0.05-0.06) | 10.12 (9.11-10.94)  | 0.12 (0.1-0.14)  | 10.19 (8.48-11.88)  | 0.23 (0.02 to 0.44)    |
| 14 |                  |                  |                     |                  |                     |                        |
| 15 | Madagascar       | 1.2 (0.94-1.49)  | 22.91 (17.82-29.06) | 1.94 (1.49-2.54) | 20.34 (15.74-26.54) | -0.49 (-0.56 to -0.42) |
| 16 |                  |                  |                     |                  |                     |                        |
| 17 |                  |                  |                     |                  |                     |                        |
| 18 | Malawi           | 1.04 (0.83-1.21) | 27.48 (23.76-31.57) | 1.78 (1.46-2.15) | 26.24 (21.93-31.13) | -0.28 (-0.42 to -0.14) |
| 19 |                  |                  |                     |                  |                     |                        |
| 20 |                  |                  |                     |                  |                     |                        |
| 21 | Malaysia         | 2.18 (2.01-2.37) | 24.78 (22.57-27.13) | 6.11 (4.87-7.45) | 25.56 (20.44-31)    | -0.47 (-0.73 to -0.22) |
| 22 |                  |                  |                     |                  |                     |                        |
| 23 | Maldives         | 0.04 (0.04-0.05) | 57.41 (49.94-68.83) | 0.09 (0.07-0.1)  | 33.8 (27.82-39.77)  | -2.22 (-2.46 to -1.97) |
| 24 |                  |                  |                     |                  |                     |                        |
| 25 |                  |                  |                     |                  |                     |                        |
| 26 | Mali             | 1.52 (1.21-1.91) | 37.05 (29.91-46.42) | 2.7 (2.07-3.46)  | 31.19 (25-38.82)    | -0.45 (-0.61 to -0.29) |
| 27 |                  |                  |                     |                  |                     |                        |
| 28 | Malta            | 0.05 (0.05-0.06) | 13.49 (12.13-14.67) | 0.11 (0.09-0.12) | 10.34 (8.85-11.81)  | -0.93 (-1.14 to -0.72) |
| 29 |                  |                  |                     |                  |                     |                        |
| 30 |                  |                  |                     |                  |                     |                        |
| 31 | Marshall Islands | 0.01 (0.01-0.01) | 39.58 (31.44-51.85) | 0.02 (0.01-0.02) | 53.39 (39.7-72.05)  | 1.04 (0.78 to 1.3)     |
| 32 |                  |                  |                     |                  |                     |                        |
| 33 |                  |                  |                     |                  |                     |                        |
| 34 | Mauritania       | 0.45 (0.38-0.53) | 47.02 (39-55.12)    | 0.59 (0.44-0.76) | 30.91 (23.68-38.57) | -1.45 (-1.52 to -1.37) |
| 35 |                  |                  |                     |                  |                     |                        |
| 36 | Mauritius        | 0.31 (0.29-0.33) | 44.68 (41.91-47.57) | 1.26 (1.03-1.53) | 75.03 (61.8-90.76)  | 2.09 (1.74 to 2.45)    |
| 37 |                  |                  |                     |                  |                     |                        |
| 38 |                  |                  |                     |                  |                     |                        |
| 39 |                  |                  |                     |                  |                     |                        |
| 40 |                  |                  |                     |                  |                     |                        |
| 41 |                  |                  |                     |                  |                     |                        |
| 42 |                  |                  |                     |                  |                     |                        |
| 43 |                  |                  |                     |                  |                     |                        |
| 44 |                  |                  |                     |                  |                     |                        |
| 45 |                  |                  |                     |                  |                     |                        |
| 46 |                  |                  |                     |                  |                     |                        |

|    |                                  |                     |                     |                    |                     |                        |
|----|----------------------------------|---------------------|---------------------|--------------------|---------------------|------------------------|
| 1  |                                  |                     |                     |                    |                     |                        |
| 2  |                                  |                     |                     |                    |                     |                        |
| 3  |                                  |                     |                     |                    |                     |                        |
| 4  |                                  |                     |                     |                    |                     |                        |
| 5  | Mexico                           | 12.18 (11.63-12.52) | 30.65 (28.76-31.74) | 72.54 (62.59-82.5) | 63.67 (55.02-72.25) | 2.85 (2.43 to 3.27)    |
| 6  |                                  |                     |                     |                    |                     |                        |
| 7  |                                  |                     |                     |                    |                     |                        |
| 8  | Micronesia (Federated States of) | 0.02 (0.02-0.03)    | 49.5 (39.15-64.24)  | 0.05 (0.03-0.06)   | 77.21 (57.56-97.54) | 1.45 (1.05 to 1.84)    |
| 9  |                                  |                     |                     |                    |                     |                        |
| 10 | Monaco                           | 0 (0-0)             | 4.16 (3.41-4.99)    | 0.01 (0.01-0.01)   | 6.28 (5.16-7.39)    | 1.83 (1.41 to 2.26)    |
| 11 |                                  |                     |                     |                    |                     |                        |
| 12 |                                  |                     |                     |                    |                     |                        |
| 13 | Mongolia                         | 0.39 (0.33-0.46)    | 35.49 (30.53-41)    | 0.39 (0.31-0.5)    | 17.81 (14.41-22.12) | -3.6 (-4.07 to -3.12)  |
| 14 |                                  |                     |                     |                    |                     |                        |
| 15 | Montenegro                       | 0.07 (0.07-0.08)    | 12.43 (11.17-13.87) | 0.13 (0.11-0.15)   | 13.82 (11.6-16.13)  | 0.55 (0.38 to 0.72)    |
| 16 |                                  |                     |                     |                    |                     |                        |
| 17 |                                  |                     |                     |                    |                     |                        |
| 18 | Morocco                          | 3.55 (3.03-4.63)    | 29.43 (24.56-41.35) | 9.32 (7.16-11.84)  | 35.84 (27.87-46.25) | 0.76 (0.62 to 0.89)    |
| 19 |                                  |                     |                     |                    |                     |                        |
| 20 | Mozambique                       | 1.24 (1.02-1.52)    | 22.84 (18.92-28.33) | 2.64 (2.08-3.28)   | 25.87 (21.06-32.1)  | 0.5 (0.37 to 0.63)     |
| 21 |                                  |                     |                     |                    |                     |                        |
| 22 |                                  |                     |                     |                    |                     |                        |
| 23 | Myanmar                          | 7.64 (5.94-9.5)     | 30.76 (24.01-38.16) | 11.55 (9.73-13.96) | 26.84 (23.21-32.3)  | -0.53 (-0.65 to -0.41) |
| 24 |                                  |                     |                     |                    |                     |                        |
| 25 |                                  |                     |                     |                    |                     |                        |
| 26 | Namibia                          | 0.18 (0.13-0.24)    | 27.85 (20.88-37.4)  | 0.35 (0.25-0.49)   | 27.4 (20-38.41)     | -0.39 (-0.75 to -0.02) |
| 27 |                                  |                     |                     |                    |                     |                        |
| 28 | Nauru                            | 0 (0-0)             | 49.17 (38.1-60.09)  | 0 (0-0)            | 66.61 (49.13-82.46) | 0.93 (0.61 to 1.25)    |
| 29 |                                  |                     |                     |                    |                     |                        |
| 30 |                                  |                     |                     |                    |                     |                        |
| 31 | Nepal                            | 1.73 (1.27-2.25)    | 18.15 (13.34-24.47) | 5.11 (3.58-6.71)   | 25.06 (17.71-32.79) | 1.23 (0.94 to 1.53)    |
| 32 |                                  |                     |                     |                    |                     |                        |
| 33 |                                  |                     |                     |                    |                     |                        |
| 34 | Netherlands                      | 1.68 (1.48-1.82)    | 8.42 (7.37-9.15)    | 3.78 (3.23-4.22)   | 9.8 (8.42-10.92)    | 0.67 (0.59 to 0.75)    |
| 35 |                                  |                     |                     |                    |                     |                        |
| 36 | New Zealand                      | 0.31 (0.28-0.33)    | 8.26 (7.56-8.83)    | 0.91 (0.79-1)      | 10.82 (9.52-11.82)  | 1.04 (0.82 to 1.27)    |
| 37 |                                  |                     |                     |                    |                     |                        |
| 38 |                                  |                     |                     |                    |                     |                        |
| 39 |                                  |                     |                     |                    |                     |                        |
| 40 |                                  |                     |                     |                    |                     |                        |
| 41 |                                  |                     |                     |                    |                     |                        |
| 42 |                                  |                     |                     |                    |                     |                        |
| 43 |                                  |                     |                     |                    |                     |                        |
| 44 |                                  |                     |                     |                    |                     |                        |
| 45 |                                  |                     |                     |                    |                     |                        |
| 46 |                                  |                     |                     |                    |                     |                        |

|    |                          |                     |                     |                     |                     |                       |
|----|--------------------------|---------------------|---------------------|---------------------|---------------------|-----------------------|
| 1  |                          |                     |                     |                     |                     |                       |
| 2  |                          |                     |                     |                     |                     |                       |
| 3  |                          |                     |                     |                     |                     |                       |
| 4  |                          |                     |                     |                     |                     |                       |
| 5  | Nicaragua                | 0.61 (0.57-0.65)    | 37.62 (34.76-40.75) | 3.48 (2.87-4.09)    | 83.24 (69.57-96.75) | 3.14 (2.79 to 3.49)   |
| 6  |                          |                     |                     |                     |                     |                       |
| 7  |                          |                     |                     |                     |                     |                       |
| 8  | Niger                    | 1.07 (0.84-1.35)    | 35.2 (27.55-44.12)  | 2.2 (1.61-2.91)     | 28.69 (22.39-36.04) | -0.66 (-0.73 to -0.6) |
| 9  |                          |                     |                     |                     |                     |                       |
| 10 | Nigeria                  | 11.66 (9.42-14.85)  | 27.69 (22.51-35.07) | 20.04 (15.89-25.09) | 24.84 (20.27-30.37) | -0.3 (-0.36 to -0.23) |
| 11 |                          |                     |                     |                     |                     |                       |
| 12 |                          |                     |                     |                     |                     |                       |
| 13 | Niue                     | 0 (0-0)             | 35.72 (28.03-44.02) | 0 (0-0)             | 47.39 (34.47-59.33) | 0.85 (0.59 to 1.12)   |
| 14 |                          |                     |                     |                     |                     |                       |
| 15 | North Macedonia          | 0.19 (0.18-0.22)    | 11.25 (10.27-12.72) | 0.36 (0.29-0.45)    | 12.72 (10.34-15.66) | 0.3 (0.07 to 0.54)    |
| 16 |                          |                     |                     |                     |                     |                       |
| 17 |                          |                     |                     |                     |                     |                       |
| 18 | Northern Mariana Islands | 0.01 (0.01-0.01)    | 45.65 (39.08-54.81) | 0.02 (0.02-0.03)    | 56.84 (48.66-65.02) | 0.95 (0.85 to 1.06)   |
| 19 |                          |                     |                     |                     |                     |                       |
| 20 |                          |                     |                     |                     |                     |                       |
| 21 | Norway                   | 0.34 (0.31-0.36)    | 4.55 (4.2-4.77)     | 0.78 (0.67-0.84)    | 6.69 (5.84-7.25)    | 1.49 (1.18 to 1.8)    |
| 22 |                          |                     |                     |                     |                     |                       |
| 23 |                          |                     |                     |                     |                     |                       |
| 24 | Oman                     | 0.08 (0.06-0.11)    | 16.82 (12.93-22.29) | 0.2 (0.17-0.23)     | 19.85 (17.05-22.82) | 0.98 (0.78 to 1.17)   |
| 25 |                          |                     |                     |                     |                     |                       |
| 26 | Pakistan                 | 15.21 (11.34-20.54) | 26.34 (19.51-35.91) | 44.39 (32.45-56.53) | 39.88 (29.74-50.88) | 1.43 (1.17 to 1.7)    |
| 27 |                          |                     |                     |                     |                     |                       |
| 28 |                          |                     |                     |                     |                     |                       |
| 29 | Palau                    | 0.01 (0-0.01)       | 54.63 (45.05-68.31) | 0.01 (0.01-0.02)    | 69.74 (56.33-84.64) | 0.79 (0.59 to 1)      |
| 30 |                          |                     |                     |                     |                     |                       |
| 31 | Palestine                | 0.39 (0.31-0.48)    | 46.81 (37.83-57.37) | 0.65 (0.55-0.75)    | 33.58 (28.52-38.58) | -0.86 (-1.11 to -0.6) |
| 32 |                          |                     |                     |                     |                     |                       |
| 33 |                          |                     |                     |                     |                     |                       |
| 34 | Panama                   | 0.22 (0.2-0.24)     | 14.61 (13.34-15.73) | 1.15 (0.9-1.46)     | 27.39 (21.28-34.63) | 2.25 (1.89 to 2.61)   |
| 35 |                          |                     |                     |                     |                     |                       |
| 36 | Papua New Guinea         | 0.25 (0.2-0.31)     | 12.19 (9.8-14.71)   | 0.74 (0.56-0.95)    | 14.36 (11.09-17.95) | 0.51 (0.36 to 0.65)   |
| 37 |                          |                     |                     |                     |                     |                       |
| 38 |                          |                     |                     |                     |                     |                       |
| 39 |                          |                     |                     |                     |                     |                       |
| 40 |                          |                     |                     |                     |                     |                       |
| 41 |                          |                     |                     |                     |                     |                       |
| 42 |                          |                     |                     |                     |                     |                       |
| 43 |                          |                     |                     |                     |                     |                       |
| 44 |                          |                     |                     |                     |                     |                       |
| 45 |                          |                     |                     |                     |                     |                       |
| 46 |                          |                     |                     |                     |                     |                       |

1  
2  
3  
4  
5  
6  
7  
8  
9  
10  
11  
12  
13  
14  
15  
16  
17  
18  
19  
20  
21  
22  
23  
24  
25  
26  
27  
28  
29  
30  
31  
32  
33  
34  
35  
36  
37  
38  
39  
40  
41  
42  
43  
44  
45  
46

|                       |                    |                     |                     |                     |                        |
|-----------------------|--------------------|---------------------|---------------------|---------------------|------------------------|
| Paraguay              | 0.34 (0.3-0.37)    | 15.41 (13.63-17.13) | 1.88 (1.46-2.4)     | 34.76 (27.05-44.15) | 3.48 (3.24 to 3.71)    |
| Peru                  | 2.92 (2.59-3.3)    | 24.09 (21.15-27.33) | 8.04 (5.92-10.44)   | 24.72 (18.22-32.03) | 0.19 (-0.04 to 0.42)   |
| Philippines           | 10.41 (9.42-11.48) | 38.22 (34.49-42.3)  | 33.36 (27.88-39.55) | 44.7 (37.65-52.35)  | 0.92 (0.66 to 1.18)    |
| Poland                | 4.41 (4.25-4.53)   | 10.66 (10.2-10.95)  | 4.7 (3.97-5.59)     | 6.5 (5.49-7.73)     | -1.96 (-2.39 to -1.53) |
| Portugal              | 1.58 (1.49-1.67)   | 12.57 (11.77-13.3)  | 4.07 (3.45-4.51)    | 13.48 (11.55-14.86) | 0.38 (-0.07 to 0.84)   |
| Puerto Rico           | 0.99 (0.93-1.05)   | 28.44 (26.47-30.11) | 2.06 (1.6-2.59)     | 26.89 (21.12-34.09) | 0.4 (0.08 to 0.72)     |
| Qatar                 | 0.03 (0.02-0.04)   | 48.93 (38.41-84.35) | 0.13 (0.1-0.17)     | 45.88 (37.09-55.98) | 0.07 (-0.19 to 0.33)   |
| Republic of Korea     | 3.12 (2.97-3.33)   | 12.08 (11.28-12.97) | 7.98 (6.93-8.86)    | 9.56 (8.27-10.64)   | -0.56 (-0.65 to -0.47) |
| Republic of Moldova   | 0.1 (0.09-0.11)    | 2.87 (2.67-3.05)    | 0.25 (0.21-0.28)    | 4.46 (3.88-5.03)    | 1.53 (1.2 to 1.85)     |
| Romania               | 2.59 (2.47-2.69)   | 10.43 (9.94-10.84)  | 3.04 (2.55-3.61)    | 7.98 (6.68-9.46)    | -0.52 (-1.04 to 0)     |
| Russian Federation    | 9.02 (8.79-9.32)   | 5.47 (5.29-5.63)    | 11.65 (10.16-13.13) | 5.17 (4.52-5.82)    | -0.89 (-1.21 to -0.57) |
| Rwanda                | 0.93 (0.76-1.1)    | 32.51 (27.17-38.51) | 1.27 (0.99-1.56)    | 24.68 (19.41-29.96) | -1.65 (-1.93 to -1.37) |
| Saint Kitts and Nevis | 0.02 (0.02-0.02)   | 48.81 (44.79-53.28) | 0.03 (0.03-0.04)    | 53.07 (44.4-61.71)  | 0.73 (0.55 to 0.91)    |

|    |                                  |                  |                     |                  |                     |                        |
|----|----------------------------------|------------------|---------------------|------------------|---------------------|------------------------|
| 1  |                                  |                  |                     |                  |                     |                        |
| 2  |                                  |                  |                     |                  |                     |                        |
| 3  |                                  |                  |                     |                  |                     |                        |
| 4  |                                  |                  |                     |                  |                     |                        |
| 5  | Saint Lucia                      | 0.03 (0.02-0.03) | 31.56 (29.14-33.94) | 0.07 (0.06-0.08) | 34.59 (28.97-40.83) | 0.39 (0.16 to 0.62)    |
| 6  |                                  |                  |                     |                  |                     |                        |
| 7  |                                  |                  |                     |                  |                     |                        |
| 8  | Saint Vincent and the Grenadines | 0.02 (0.02-0.02) | 25.51 (23.01-27.92) | 0.05 (0.04-0.05) | 36.54 (31.68-42.06) | 1.55 (1.32 to 1.78)    |
| 9  |                                  |                  |                     |                  |                     |                        |
| 10 | Samoa                            | 0.03 (0.02-0.04) | 37.95 (30.01-47.78) | 0.06 (0.05-0.08) | 44.6 (36.37-54.81)  | 0.47 (0.26 to 0.68)    |
| 11 |                                  |                  |                     |                  |                     |                        |
| 12 |                                  |                  |                     |                  |                     |                        |
| 13 | San Marino                       | 0 (0-0)          | 4.05 (3.41-4.74)    | 0 (0-0.01)       | 5.09 (3.52-6.82)    | 1.51 (1.24 to 1.77)    |
| 14 |                                  |                  |                     |                  |                     |                        |
| 15 | Sao Tome and Principe            | 0.03 (0.02-0.03) | 43.51 (36.27-49.57) | 0.05 (0.04-0.06) | 51.3 (40.4-59.87)   | 0.48 (0.36 to 0.6)     |
| 16 |                                  |                  |                     |                  |                     |                        |
| 17 |                                  |                  |                     |                  |                     |                        |
| 18 | Saudi Arabia                     | 2.48 (1.93-3.1)  | 47.9 (37.69-59.35)  | 6.93 (5.45-8.55) | 52.88 (42.82-63.11) | 0.58 (0.35 to 0.81)    |
| 19 |                                  |                  |                     |                  |                     |                        |
| 20 |                                  |                  |                     |                  |                     |                        |
| 21 | Senegal                          | 1.33 (1.04-1.71) | 41.68 (33.28-53.19) | 2.45 (1.89-3.22) | 34.93 (27.7-45.06)  | -0.54 (-0.67 to -0.42) |
| 22 |                                  |                  |                     |                  |                     |                        |
| 23 | Serbia                           | 1.42 (1.28-1.67) | 14 (12.58-16.3)     | 2.52 (2.05-3)    | 16.34 (13.34-19.38) | 0.83 (0.66 to 1)       |
| 24 |                                  |                  |                     |                  |                     |                        |
| 25 |                                  |                  |                     |                  |                     |                        |
| 26 | Seychelles                       | 0.02 (0.01-0.02) | 29.87 (26.45-33.1)  | 0.04 (0.04-0.05) | 44.43 (38.76-49.83) | 0.9 (0.52 to 1.29)     |
| 27 |                                  |                  |                     |                  |                     |                        |
| 28 | Sierra Leone                     | 0.64 (0.51-0.79) | 32.65 (26.08-39.62) | 1.04 (0.79-1.33) | 28.55 (22.85-35.84) | -0.28 (-0.36 to -0.2)  |
| 29 |                                  |                  |                     |                  |                     |                        |
| 30 |                                  |                  |                     |                  |                     |                        |
| 31 | Singapore                        | 0.31 (0.29-0.33) | 15.54 (14.57-16.4)  | 0.76 (0.66-0.83) | 10.51 (9.09-11.55)  | -0.38 (-0.94 to 0.18)  |
| 32 |                                  |                  |                     |                  |                     |                        |
| 33 |                                  |                  |                     |                  |                     |                        |
| 34 | Slovakia                         | 0.69 (0.64-0.74) | 11.86 (11.06-12.74) | 0.76 (0.6-0.93)  | 8.42 (6.73-10.33)   | -1.05 (-1.13 to -0.96) |
| 35 |                                  |                  |                     |                  |                     |                        |
| 36 | Slovenia                         | 0.15 (0.12-0.19) | 6.5 (5.14-8.02)     | 0.26 (0.2-0.33)  | 4.99 (3.91-6.36)    | -0.16 (-0.44 to 0.13)  |
| 37 |                                  |                  |                     |                  |                     |                        |
| 38 |                                  |                  |                     |                  |                     |                        |
| 39 |                                  |                  |                     |                  |                     |                        |
| 40 |                                  |                  |                     |                  |                     |                        |
| 41 |                                  |                  |                     |                  |                     |                        |
| 42 |                                  |                  |                     |                  |                     |                        |
| 43 |                                  |                  |                     |                  |                     |                        |
| 44 |                                  |                  |                     |                  |                     |                        |
| 45 |                                  |                  |                     |                  |                     |                        |
| 46 |                                  |                  |                     |                  |                     |                        |

|    |                            |                  |                     |                     |                     |                        |
|----|----------------------------|------------------|---------------------|---------------------|---------------------|------------------------|
| 1  |                            |                  |                     |                     |                     |                        |
| 2  |                            |                  |                     |                     |                     |                        |
| 3  |                            |                  |                     |                     |                     |                        |
| 4  |                            |                  |                     |                     |                     |                        |
| 5  | Solomon Islands            | 0.07 (0.05-0.09) | 41.92 (31.97-57.06) | 0.09 (0.07-0.11)    | 25.15 (20.72-29.99) | -1.94 (-2.35 to -1.53) |
| 6  |                            |                  |                     |                     |                     |                        |
| 7  |                            |                  |                     |                     |                     |                        |
| 8  | Somalia                    | 0.76 (0.57-0.96) | 31.28 (23.57-39.61) | 1.88 (1.43-2.5)     | 29.63 (22.61-39.38) | -0.06 (-0.11 to -0.01) |
| 9  |                            |                  |                     |                     |                     |                        |
| 10 | South Africa               | 4.61 (4.25-5.07) | 22 (20.07-24.29)    | 12.35 (11.41-13.22) | 31.02 (28.44-33.22) | 1.29 (0.9 to 1.68)     |
| 11 |                            |                  |                     |                     |                     |                        |
| 12 |                            |                  |                     |                     |                     |                        |
| 13 | South Sudan                | 0.65 (0.48-0.83) | 27.62 (20.27-35.67) | 0.93 (0.69-1.25)    | 27.22 (20.38-35.97) | -0.06 (-0.09 to -0.02) |
| 14 |                            |                  |                     |                     |                     |                        |
| 15 |                            |                  |                     |                     |                     |                        |
| 16 | Spain                      | 7.68 (6.91-8.29) | 14.79 (13.28-15.99) | 14.65 (12.08-16.74) | 11.06 (9.33-12.49)  | -0.87 (-0.94 to -0.8)  |
| 17 |                            |                  |                     |                     |                     |                        |
| 18 | Sri Lanka                  | 2.49 (2.21-2.74) | 25.27 (22.31-27.99) | 5.56 (4.15-7.26)    | 24.09 (18.08-31.21) | -0.11 (-0.51 to 0.28)  |
| 19 |                            |                  |                     |                     |                     |                        |
| 20 |                            |                  |                     |                     |                     |                        |
| 21 | Sudan                      | 2.61 (2.06-3.46) | 28.53 (22.13-40.32) | 4.75 (3.37-7.17)    | 28.39 (20.33-44.3)  | 0.05 (-0.04 to 0.14)   |
| 22 |                            |                  |                     |                     |                     |                        |
| 23 | Suriname                   | 0.07 (0.07-0.08) | 28.55 (25.56-30.97) | 0.26 (0.22-0.31)    | 45.34 (37.97-53.46) | 1.67 (1.38 to 1.96)    |
| 24 |                            |                  |                     |                     |                     |                        |
| 25 |                            |                  |                     |                     |                     |                        |
| 26 | Sweden                     | 0.65 (0.59-0.69) | 3.93 (3.59-4.17)    | 2 (1.68-2.21)       | 7.5 (6.43-8.23)     | 2.55 (2.42 to 2.67)    |
| 27 |                            |                  |                     |                     |                     |                        |
| 28 |                            |                  |                     |                     |                     |                        |
| 29 | Switzerland                | 0.61 (0.54-0.66) | 5.43 (4.84-5.87)    | 2.22 (1.82-2.52)    | 9.49 (7.91-10.75)   | 2.76 (2.5 to 3.03)     |
| 30 |                            |                  |                     |                     |                     |                        |
| 31 | Syrian Arab Republic       | 1.95 (1.61-2.37) | 36.99 (30.44-46.13) | 2.66 (2.07-3.42)    | 27.78 (22.07-34.58) | -1.65 (-1.95 to -1.34) |
| 32 |                            |                  |                     |                     |                     |                        |
| 33 |                            |                  |                     |                     |                     |                        |
| 34 | Taiwan (Province of China) | 3.33 (3.14-3.53) | 26.1 (24.33-27.84)  | 8.25 (6.51-10.33)   | 20.47 (16.14-25.73) | -0.94 (-1.1 to -0.79)  |
| 35 |                            |                  |                     |                     |                     |                        |
| 36 | Tajikistan                 | 0.1 (0.1-0.11)   | 3.18 (2.94-3.47)    | 0.4 (0.33-0.49)     | 9.4 (7.8-11.25)     | 4.07 (3.7 to 4.45)     |
| 37 |                            |                  |                     |                     |                     |                        |
| 38 |                            |                  |                     |                     |                     |                        |
| 39 |                            |                  |                     |                     |                     |                        |
| 40 |                            |                  |                     |                     |                     |                        |
| 41 |                            |                  |                     |                     |                     |                        |
| 42 |                            |                  |                     |                     |                     |                        |
| 43 |                            |                  |                     |                     |                     |                        |
| 44 |                            |                  |                     |                     |                     |                        |
| 45 |                            |                  |                     |                     |                     |                        |
| 46 |                            |                  |                     |                     |                     |                        |

|    |                      |                    |                     |                     |                     |                        |
|----|----------------------|--------------------|---------------------|---------------------|---------------------|------------------------|
| 1  |                      |                    |                     |                     |                     |                        |
| 2  |                      |                    |                     |                     |                     |                        |
| 3  |                      |                    |                     |                     |                     |                        |
| 4  |                      |                    |                     |                     |                     |                        |
| 5  | Thailand             | 9.77 (8.63-11.15)  | 29.2 (25.83-33.3)   | 27.45 (21.01-35.47) | 27.94 (21.36-35.99) | -0.38 (-0.48 to -0.28) |
| 6  |                      |                    |                     |                     |                     |                        |
| 7  |                      |                    |                     |                     |                     |                        |
| 8  | Timor-Leste          | 0.09 (0.07-0.12)   | 31.54 (24.73-42.46) | 0.23 (0.17-0.3)     | 31.3 (24.09-39.75)  | -0.04 (-0.24 to 0.15)  |
| 9  |                      |                    |                     |                     |                     |                        |
| 10 | Togo                 | 0.43 (0.35-0.54)   | 34.23 (28.17-42.73) | 1 (0.79-1.27)       | 30.2 (24.51-37.23)  | -0.43 (-0.47 to -0.39) |
| 11 |                      |                    |                     |                     |                     |                        |
| 12 |                      |                    |                     |                     |                     |                        |
| 13 | Tokelau              | 0 (0-0)            | 32.9 (25.7-42.75)   | 0 (0-0)             | 40.42 (31.37-54.02) | 0.67 (0.44 to 0.9)     |
| 14 |                      |                    |                     |                     |                     |                        |
| 15 | Tonga                | 0.01 (0.01-0.02)   | 28.56 (23.31-37.54) | 0.03 (0.03-0.04)    | 41.51 (33.11-54.56) | 1.25 (0.87 to 1.63)    |
| 16 |                      |                    |                     |                     |                     |                        |
| 17 |                      |                    |                     |                     |                     |                        |
| 18 | Trinidad and Tobago  | 0.18 (0.16-0.19)   | 21.8 (20.39-23.17)  | 0.62 (0.46-0.8)     | 34.37 (25.88-44.38) | 2 (1.76 to 2.25)       |
| 19 |                      |                    |                     |                     |                     |                        |
| 20 |                      |                    |                     |                     |                     |                        |
| 21 | Tunisia              | 1.03 (0.88-1.23)   | 24.28 (20.58-29.37) | 2.63 (1.88-3.49)    | 23.62 (16.87-31.07) | -0.12 (-0.16 to -0.09) |
| 22 |                      |                    |                     |                     |                     |                        |
| 23 | Turkey               | 11.61 (9.54-15.85) | 35.19 (28.26-50.25) | 19.19 (15.49-23.48) | 23.48 (18.99-28.71) | -1.28 (-1.59 to -0.97) |
| 24 |                      |                    |                     |                     |                     |                        |
| 25 |                      |                    |                     |                     |                     |                        |
| 26 | Turkmenistan         | 0.31 (0.29-0.33)   | 13.45 (12.55-14.37) | 0.71 (0.58-0.9)     | 17.38 (14.16-21.64) | 0.34 (0.03 to 0.65)    |
| 27 |                      |                    |                     |                     |                     |                        |
| 28 | Tuvalu               | 0 (0-0)            | 38.58 (30.62-49.14) | 0 (0-0.01)          | 48.67 (35.96-66.59) | 0.78 (0.56 to 0.99)    |
| 29 |                      |                    |                     |                     |                     |                        |
| 30 |                      |                    |                     |                     |                     |                        |
| 31 | Uganda               | 1.55 (1.2-1.94)    | 25.22 (19.55-31.82) | 3.39 (2.62-4.26)    | 25.81 (20.58-31.71) | -0.19 (-0.32 to -0.05) |
| 32 |                      |                    |                     |                     |                     |                        |
| 33 |                      |                    |                     |                     |                     |                        |
| 34 | Ukraine              | 1.41 (1.34-1.47)   | 2.29 (2.15-2.39)    | 2.66 (2.28-3.07)    | 3.86 (3.31-4.47)    | 2.18 (1.89 to 2.47)    |
| 35 |                      |                    |                     |                     |                     |                        |
| 36 | United Arab Emirates | 0.21 (0.16-0.26)   | 61.23 (37.47-75.7)  | 1.43 (0.91-2.26)    | 48.09 (29.07-73.62) | -0.82 (-1.4 to -0.24)  |
| 37 |                      |                    |                     |                     |                     |                        |
| 38 |                      |                    |                     |                     |                     |                        |
| 39 |                      |                    |                     |                     |                     |                        |
| 40 |                      |                    |                     |                     |                     |                        |
| 41 |                      |                    |                     |                     |                     |                        |
| 42 |                      |                    |                     |                     |                     |                        |
| 43 |                      |                    |                     |                     |                     |                        |
| 44 |                      |                    |                     |                     |                     |                        |
| 45 |                      |                    |                     |                     |                     |                        |
| 46 |                      |                    |                     |                     |                     |                        |



1  
2  
3  
4  
5  
6  
7  
8  
9  
10  
11  
12  
13  
14  
15  
16  
17  
18  
19  
20  
21  
22  
23  
24  
25  
26  
27  
28  
29  
30  
31  
32  
33  
34  
35  
36  
37  
38  
39  
40  
41  
42  
43  
44  
45  
46

|                                    |                    |                     |                       |                     |                        |
|------------------------------------|--------------------|---------------------|-----------------------|---------------------|------------------------|
| United Kingdom                     | 4.97 (4.64-5.15)   | 5.41 (5.03-5.63)    | 7.78 (6.85-8.33)      | 5.29 (4.7-5.64)     | 0.38 (0.12 to 0.64)    |
| United Republic of Tanzania        | 2.75 (2.31-3.27)   | 26.7 (22.58-32.2)   | 6.23 (5.26-7.36)      | 27.3 (23.17-31.68)  | 0.13 (0.05 to 0.2)     |
| United States of America           | 33.1 (30.49-34.45) | 9.94 (9.18-10.34)   | 106.95 (95.86-114.38) | 17.77 (16.12-18.91) | 2.43 (2.22 to 2.63)    |
| United States Virgin Islands       | 0.02 (0.01-0.02)   | 21.34 (18.16-24.86) | 0.05 (0.04-0.06)      | 30.18 (25.88-34.3)  | 1.76 (1.53 to 1.99)    |
| Uruguay                            | 0.51 (0.47-0.54)   | 13.21 (12.24-14.02) | 0.99 (0.87-1.09)      | 15.9 (14.15-17.4)   | 0.94 (0.8 to 1.09)     |
| Uzbekistan                         | 1.89 (1.64-2.52)   | 14.76 (12.61-20.49) | 3.97 (3.33-4.67)      | 19.85 (17.05-22.89) | 0.69 (-0.1 to 1.5)     |
| Vanuatu                            | 0.02 (0.01-0.02)   | 26.09 (18.67-35.84) | 0.07 (0.05-0.09)      | 43.38 (32.55-57.97) | 1.91 (1.78 to 2.04)    |
| Venezuela (Bolivarian Republic of) | 1.55 (1.46-1.64)   | 16.19 (15.07-17.25) | 10.41 (7.89-13.43)    | 36.77 (27.88-47.38) | 2.43 (1.94 to 2.92)    |
| Viet Nam                           | 11.03 (8.95-13.56) | 29.05 (23.77-35.4)  | 21.48 (16.68-25.81)   | 26.62 (20.89-31.76) | -0.38 (-0.85 to 0.09)  |
| Yemen                              | 1.15 (0.86-1.54)   | 24.8 (18.61-34.23)  | 2.68 (2.05-3.54)      | 23.19 (18.02-30.53) | -0.26 (-0.33 to -0.18) |
| Zambia                             | 0.95 (0.81-1.11)   | 32.83 (27.31-38.79) | 1.93 (1.55-2.4)       | 30.81 (25.1-37.46)  | -0.48 (-0.66 to -0.3)  |
| Zimbabwe                           | 0.92 (0.7-1.36)    | 25.95 (20.13-37.57) | 2.29 (1.66-3.38)      | 37.07 (27.36-55.38) | 1.55 (1.21 to 1.89)    |

**Supplemental table 5. Death cases ratio between females to males and age-standardized death rate (ASDR) ratio between females to males in 21 geographic regions from 1990 to 2019 in 21 regions.**

| location             | year | Ratio of female to male death cases | Ratio of female ASDR to male ASDR |
|----------------------|------|-------------------------------------|-----------------------------------|
| Andean Latin America | 1990 | 0.942869                            | 0.890741                          |
| Andean Latin America | 1991 | 0.989165                            | 0.932389                          |
| Andean Latin America | 1992 | 1.02563                             | 0.967065                          |
| Andean Latin America | 1993 | 1.016962                            | 0.958297                          |
| Andean Latin America | 1994 | 1.061313                            | 1.001181                          |
| Andean Latin America | 1995 | 1.077537                            | 1.019983                          |
| Andean Latin America | 1996 | 1.032404                            | 0.980159                          |
| Andean Latin America | 1997 | 1.030348                            | 0.978622                          |
| Andean Latin America | 1998 | 1.022574                            | 0.969425                          |
| Andean Latin America | 1999 | 0.992515                            | 0.940177                          |

1  
2  
3  
4  
5  
6  
7  
8  
9  
10  
11  
12  
13  
14  
15  
16  
17  
18  
19  
20  
21  
22  
23  
24  
25  
26  
27  
28  
29  
30  
31  
32  
33  
34  
35  
36  
37  
38  
39  
40  
41  
42  
43  
44  
45  
46

|                      |      |          |          |
|----------------------|------|----------|----------|
| Andean Latin America | 2000 | 0.997206 | 0.943015 |
| Andean Latin America | 2001 | 0.947616 | 0.894712 |
| Andean Latin America | 2002 | 0.990555 | 0.931385 |
| Andean Latin America | 2003 | 1.019051 | 0.956351 |
| Andean Latin America | 2004 | 0.985019 | 0.922183 |
| Andean Latin America | 2005 | 0.978694 | 0.912562 |
| Andean Latin America | 2006 | 0.961884 | 0.892727 |
| Andean Latin America | 2007 | 0.945709 | 0.874394 |
| Andean Latin America | 2008 | 0.952065 | 0.876611 |
| Andean Latin America | 2009 | 0.97062  | 0.890118 |
| Andean Latin America | 2010 | 0.975539 | 0.890804 |
| Andean Latin America | 2011 | 0.970379 | 0.882799 |
| Andean Latin America | 2012 | 1.010809 | 0.91578  |

|                      |      |          |          |
|----------------------|------|----------|----------|
| Andean Latin America | 2013 | 1.013769 | 0.915689 |
| Andean Latin America | 2014 | 1.008176 | 0.908392 |
| Andean Latin America | 2015 | 1.003827 | 0.902681 |
| Andean Latin America | 2016 | 1.013695 | 0.90961  |
| Andean Latin America | 2017 | 1.021095 | 0.915073 |
| Andean Latin America | 2018 | 1.028281 | 0.920944 |
| Andean Latin America | 2019 | 1.042441 | 0.933531 |
| Australasia          | 1990 | 1.256436 | 0.749952 |
| Australasia          | 1991 | 1.251345 | 0.749596 |
| Australasia          | 1992 | 1.221065 | 0.731598 |
| Australasia          | 1993 | 1.197424 | 0.715706 |
| Australasia          | 1994 | 1.184041 | 0.705074 |
| Australasia          | 1995 | 1.189314 | 0.708414 |

1  
2  
3  
4  
5  
6  
7  
8  
9  
10  
11  
12  
13  
14  
15  
16  
17  
18  
19  
20  
21  
22  
23  
24  
25  
26  
27  
28  
29  
30  
31  
32  
33  
34  
35  
36  
37  
38  
39  
40  
41  
42  
43  
44  
45  
46

|             |      |          |          |
|-------------|------|----------|----------|
| Australasia | 1996 | 1.171815 | 0.699034 |
| Australasia | 1997 | 1.154972 | 0.694376 |
| Australasia | 1998 | 1.125176 | 0.679026 |
| Australasia | 1999 | 1.123    | 0.679313 |
| Australasia | 2000 | 1.107004 | 0.67342  |
| Australasia | 2001 | 1.092594 | 0.667626 |
| Australasia | 2002 | 1.09213  | 0.668502 |
| Australasia | 2003 | 1.073556 | 0.660159 |
| Australasia | 2004 | 1.093004 | 0.674235 |
| Australasia | 2005 | 1.109953 | 0.687767 |
| Australasia | 2006 | 1.11501  | 0.694533 |
| Australasia | 2007 | 1.119263 | 0.702944 |
| Australasia | 2008 | 1.12093  | 0.709291 |

|             |      |          |          |
|-------------|------|----------|----------|
| Australasia | 2009 | 1.12578  | 0.717931 |
| Australasia | 2010 | 1.119825 | 0.719347 |
| Australasia | 2011 | 1.110324 | 0.720219 |
| Australasia | 2012 | 1.102299 | 0.723081 |
| Australasia | 2013 | 1.092797 | 0.725804 |
| Australasia | 2014 | 1.087757 | 0.72868  |
| Australasia | 2015 | 1.082458 | 0.732461 |
| Australasia | 2016 | 1.075631 | 0.733734 |
| Australasia | 2017 | 1.056633 | 0.72804  |
| Australasia | 2018 | 1.040454 | 0.72481  |
| Australasia | 2019 | 1.025964 | 0.721186 |
| Caribbean   | 1990 | 0.778203 | 0.705687 |
| Caribbean   | 1991 | 0.789518 | 0.714482 |

1  
2  
3  
4  
5  
6  
7  
8  
9  
10  
11  
12  
13  
14  
15  
16  
17  
18  
19  
20  
21  
22  
23  
24  
25  
26  
27  
28  
29  
30  
31  
32  
33  
34  
35  
36  
37  
38  
39  
40  
41  
42  
43  
44  
45  
46

|           |      |          |          |
|-----------|------|----------|----------|
| Caribbean | 1992 | 0.790374 | 0.71231  |
| Caribbean | 1993 | 0.795133 | 0.714068 |
| Caribbean | 1994 | 0.794694 | 0.711298 |
| Caribbean | 1995 | 0.795712 | 0.709507 |
| Caribbean | 1996 | 0.799616 | 0.710759 |
| Caribbean | 1997 | 0.797003 | 0.706666 |
| Caribbean | 1998 | 0.795225 | 0.702657 |
| Caribbean | 1999 | 0.806613 | 0.710478 |
| Caribbean | 2000 | 0.84186  | 0.739455 |
| Caribbean | 2001 | 0.85681  | 0.751266 |
| Caribbean | 2002 | 0.865068 | 0.757623 |
| Caribbean | 2003 | 0.877107 | 0.766409 |
| Caribbean | 2004 | 0.894996 | 0.780393 |

|           |      |          |          |
|-----------|------|----------|----------|
| Caribbean | 2005 | 0.901407 | 0.785161 |
| Caribbean | 2006 | 0.90325  | 0.786336 |
| Caribbean | 2007 | 0.896328 | 0.779649 |
| Caribbean | 2008 | 0.888385 | 0.771347 |
| Caribbean | 2009 | 0.877739 | 0.760608 |
| Caribbean | 2010 | 0.902529 | 0.780843 |
| Caribbean | 2011 | 0.894764 | 0.774198 |
| Caribbean | 2012 | 0.897262 | 0.776873 |
| Caribbean | 2013 | 0.897109 | 0.776448 |
| Caribbean | 2014 | 0.895273 | 0.774364 |
| Caribbean | 2015 | 0.890096 | 0.769517 |
| Caribbean | 2016 | 0.888374 | 0.767038 |
| Caribbean | 2017 | 0.887092 | 0.764536 |



1  
2  
3  
4  
5  
6  
7  
8  
9  
10  
11  
12  
13  
14  
15  
16  
17  
18  
19  
20  
21  
22  
23  
24  
25  
26  
27  
28  
29  
30  
31  
32  
33  
34  
35  
36  
37  
38  
39  
40  
41  
42  
43  
44  
45  
46

|              |      |          |          |
|--------------|------|----------|----------|
| Caribbean    | 2018 | 0.894349 | 0.768945 |
| Caribbean    | 2019 | 0.900884 | 0.773334 |
| Central Asia | 1990 | 0.993776 | 0.730286 |
| Central Asia | 1991 | 0.991773 | 0.731194 |
| Central Asia | 1992 | 0.989487 | 0.735739 |
| Central Asia | 1993 | 0.982871 | 0.732542 |
| Central Asia | 1994 | 0.967481 | 0.724436 |
| Central Asia | 1995 | 0.953222 | 0.716344 |
| Central Asia | 1996 | 0.932845 | 0.703873 |
| Central Asia | 1997 | 0.939018 | 0.708663 |
| Central Asia | 1998 | 0.942864 | 0.711008 |
| Central Asia | 1999 | 0.93285  | 0.706787 |
| Central Asia | 2000 | 0.914752 | 0.697569 |

|              |      |          |          |
|--------------|------|----------|----------|
| Central Asia | 2001 | 0.90155  | 0.688619 |
| Central Asia | 2002 | 0.889552 | 0.67599  |
| Central Asia | 2003 | 0.880783 | 0.667315 |
| Central Asia | 2004 | 0.876683 | 0.667546 |
| Central Asia | 2005 | 0.878457 | 0.676155 |
| Central Asia | 2006 | 0.867182 | 0.670221 |
| Central Asia | 2007 | 0.861093 | 0.665534 |
| Central Asia | 2008 | 0.858393 | 0.661361 |
| Central Asia | 2009 | 0.865353 | 0.664304 |
| Central Asia | 2010 | 0.870146 | 0.66312  |
| Central Asia | 2011 | 0.864532 | 0.659123 |
| Central Asia | 2012 | 0.866978 | 0.660768 |
| Central Asia | 2013 | 0.863849 | 0.658662 |

1  
2  
3  
4  
5  
6  
7  
8  
9  
10  
11  
12  
13  
14  
15  
16  
17  
18  
19  
20  
21  
22  
23  
24  
25  
26  
27  
28  
29  
30  
31  
32  
33  
34  
35  
36  
37  
38  
39  
40  
41  
42  
43  
44  
45  
46

|                |      |          |          |
|----------------|------|----------|----------|
| Central Asia   | 2014 | 0.851903 | 0.644534 |
| Central Asia   | 2015 | 0.851577 | 0.639005 |
| Central Asia   | 2016 | 0.849903 | 0.637999 |
| Central Asia   | 2017 | 0.850543 | 0.637766 |
| Central Asia   | 2018 | 0.846082 | 0.636936 |
| Central Asia   | 2019 | 0.848602 | 0.64247  |
| Central Europe | 1990 | 0.955491 | 0.661719 |
| Central Europe | 1991 | 0.961364 | 0.663657 |
| Central Europe | 1992 | 0.957234 | 0.658579 |
| Central Europe | 1993 | 0.965166 | 0.660903 |
| Central Europe | 1994 | 0.966613 | 0.660389 |
| Central Europe | 1995 | 0.971466 | 0.661423 |
| Central Europe | 1996 | 0.979487 | 0.662808 |

|                |      |          |          |
|----------------|------|----------|----------|
| Central Europe | 1997 | 0.989711 | 0.667123 |
| Central Europe | 1998 | 0.99268  | 0.662612 |
| Central Europe | 1999 | 1.007421 | 0.665519 |
| Central Europe | 2000 | 1.009404 | 0.66032  |
| Central Europe | 2001 | 1.001136 | 0.650922 |
| Central Europe | 2002 | 0.99002  | 0.639423 |
| Central Europe | 2003 | 0.985822 | 0.633371 |
| Central Europe | 2004 | 0.987337 | 0.630977 |
| Central Europe | 2005 | 0.996463 | 0.635996 |
| Central Europe | 2006 | 1.012738 | 0.645361 |
| Central Europe | 2007 | 1.033613 | 0.65755  |
| Central Europe | 2008 | 1.022364 | 0.649222 |
| Central Europe | 2009 | 1.028734 | 0.651344 |

1  
2  
3  
4  
5  
6  
7  
8  
9  
10  
11  
12  
13  
14  
15  
16  
17  
18  
19  
20  
21  
22  
23  
24  
25  
26  
27  
28  
29  
30  
31  
32  
33  
34  
35  
36  
37  
38  
39  
40  
41  
42  
43  
44  
45  
46

|                       |      |          |          |
|-----------------------|------|----------|----------|
| Central Europe        | 2010 | 1.028359 | 0.649302 |
| Central Europe        | 2011 | 1.026432 | 0.646255 |
| Central Europe        | 2012 | 1.039093 | 0.651483 |
| Central Europe        | 2013 | 1.047601 | 0.653682 |
| Central Europe        | 2014 | 1.058371 | 0.659537 |
| Central Europe        | 2015 | 1.069497 | 0.665303 |
| Central Europe        | 2016 | 1.065577 | 0.663071 |
| Central Europe        | 2017 | 1.059955 | 0.660605 |
| Central Europe        | 2018 | 1.058167 | 0.660511 |
| Central Europe        | 2019 | 1.056385 | 0.660778 |
| Central Latin America | 1990 | 0.977794 | 0.906047 |
| Central Latin America | 1991 | 0.960958 | 0.88965  |
| Central Latin America | 1992 | 0.96836  | 0.891993 |

|                       |      |          |          |
|-----------------------|------|----------|----------|
| Central Latin America | 1993 | 0.96676  | 0.885486 |
| Central Latin America | 1994 | 0.960737 | 0.875372 |
| Central Latin America | 1995 | 0.974102 | 0.885237 |
| Central Latin America | 1996 | 0.980331 | 0.887809 |
| Central Latin America | 1997 | 0.986228 | 0.890212 |
| Central Latin America | 1998 | 0.984161 | 0.884764 |
| Central Latin America | 1999 | 0.993865 | 0.890436 |
| Central Latin America | 2000 | 0.974373 | 0.871688 |
| Central Latin America | 2001 | 0.977773 | 0.871958 |
| Central Latin America | 2002 | 0.955348 | 0.848128 |
| Central Latin America | 2003 | 0.953418 | 0.84444  |
| Central Latin America | 2004 | 0.949965 | 0.839949 |
| Central Latin America | 2005 | 0.94173  | 0.832021 |

|                       |      |          |          |
|-----------------------|------|----------|----------|
| Central Latin America | 2006 | 0.929669 | 0.819435 |
| Central Latin America | 2007 | 0.928761 | 0.817536 |
| Central Latin America | 2008 | 0.913732 | 0.801903 |
| Central Latin America | 2009 | 0.918766 | 0.802136 |
| Central Latin America | 2010 | 0.932299 | 0.811422 |
| Central Latin America | 2011 | 0.923423 | 0.801163 |
| Central Latin America | 2012 | 0.916951 | 0.792063 |
| Central Latin America | 2013 | 0.906908 | 0.780367 |
| Central Latin America | 2014 | 0.915868 | 0.78579  |
| Central Latin America | 2015 | 0.904761 | 0.774169 |
| Central Latin America | 2016 | 0.894395 | 0.763281 |
| Central Latin America | 2017 | 0.878355 | 0.747275 |
| Central Latin America | 2018 | 0.879571 | 0.745725 |

|                            |      |          |          |
|----------------------------|------|----------|----------|
| Central Latin America      | 2019 | 0.873385 | 0.737332 |
| Central Sub-Saharan Africa | 1990 | 0.683461 | 0.582902 |
| Central Sub-Saharan Africa | 1991 | 0.694933 | 0.587758 |
| Central Sub-Saharan Africa | 1992 | 0.702424 | 0.589793 |
| Central Sub-Saharan Africa | 1993 | 0.714943 | 0.595657 |
| Central Sub-Saharan Africa | 1994 | 0.724653 | 0.59941  |
| Central Sub-Saharan Africa | 1995 | 0.732751 | 0.601448 |
| Central Sub-Saharan Africa | 1996 | 0.756166 | 0.614733 |
| Central Sub-Saharan Africa | 1997 | 0.757363 | 0.61014  |
| Central Sub-Saharan Africa | 1998 | 0.770799 | 0.615205 |
| Central Sub-Saharan Africa | 1999 | 0.783386 | 0.61934  |
| Central Sub-Saharan Africa | 2000 | 0.797995 | 0.624623 |
| Central Sub-Saharan Africa | 2001 | 0.813766 | 0.632481 |



1  
2  
3  
4  
5  
6  
7  
8  
9  
10  
11  
12  
13  
14  
15  
16  
17  
18  
19  
20  
21  
22  
23  
24  
25  
26  
27  
28  
29  
30  
31  
32  
33  
34  
35  
36  
37  
38  
39  
40  
41  
42  
43  
44  
45  
46

|                            |      |          |          |
|----------------------------|------|----------|----------|
| Central Sub-Saharan Africa | 2002 | 0.833085 | 0.642304 |
| Central Sub-Saharan Africa | 2003 | 0.848224 | 0.65191  |
| Central Sub-Saharan Africa | 2004 | 0.857761 | 0.656619 |
| Central Sub-Saharan Africa | 2005 | 0.863588 | 0.659505 |
| Central Sub-Saharan Africa | 2006 | 0.861856 | 0.658283 |
| Central Sub-Saharan Africa | 2007 | 0.855563 | 0.655166 |
| Central Sub-Saharan Africa | 2008 | 0.851145 | 0.653598 |
| Central Sub-Saharan Africa | 2009 | 0.845802 | 0.651726 |
| Central Sub-Saharan Africa | 2010 | 0.838533 | 0.647863 |
| Central Sub-Saharan Africa | 2011 | 0.83013  | 0.644303 |
| Central Sub-Saharan Africa | 2012 | 0.823208 | 0.641886 |
| Central Sub-Saharan Africa | 2013 | 0.81738  | 0.640355 |
| Central Sub-Saharan Africa | 2014 | 0.813554 | 0.640249 |

|                            |      |          |          |
|----------------------------|------|----------|----------|
| Central Sub-Saharan Africa | 2015 | 0.81476  | 0.642448 |
| Central Sub-Saharan Africa | 2016 | 0.815014 | 0.646596 |
| Central Sub-Saharan Africa | 2017 | 0.815435 | 0.651542 |
| Central Sub-Saharan Africa | 2018 | 0.813046 | 0.653874 |
| Central Sub-Saharan Africa | 2019 | 0.812155 | 0.657802 |
| East Asia                  | 1990 | 0.978254 | 0.818335 |
| East Asia                  | 1991 | 0.969935 | 0.811948 |
| East Asia                  | 1992 | 0.969225 | 0.811294 |
| East Asia                  | 1993 | 0.975501 | 0.816535 |
| East Asia                  | 1994 | 0.983547 | 0.817634 |
| East Asia                  | 1995 | 0.970594 | 0.806198 |
| East Asia                  | 1996 | 0.968826 | 0.803903 |
| East Asia                  | 1997 | 0.972998 | 0.805497 |

1  
2  
3  
4  
5  
6  
7  
8  
9  
10  
11  
12  
13  
14  
15  
16  
17  
18  
19  
20  
21  
22  
23  
24  
25  
26  
27  
28  
29  
30  
31  
32  
33  
34  
35  
36  
37  
38  
39  
40  
41  
42  
43  
44  
45  
46

|           |      |          |          |
|-----------|------|----------|----------|
| East Asia | 1998 | 0.970348 | 0.796676 |
| East Asia | 1999 | 0.973644 | 0.800535 |
| East Asia | 2000 | 0.973907 | 0.806971 |
| East Asia | 2001 | 0.961738 | 0.796409 |
| East Asia | 2002 | 0.943917 | 0.783934 |
| East Asia | 2003 | 0.933697 | 0.779517 |
| East Asia | 2004 | 0.918842 | 0.76399  |
| East Asia | 2005 | 0.899777 | 0.742355 |
| East Asia | 2006 | 0.909001 | 0.745431 |
| East Asia | 2007 | 0.904869 | 0.737149 |
| East Asia | 2008 | 0.898908 | 0.729162 |
| East Asia | 2009 | 0.893633 | 0.720614 |
| East Asia | 2010 | 0.891647 | 0.714709 |

|                |      |          |          |
|----------------|------|----------|----------|
| East Asia      | 2011 | 0.88997  | 0.706791 |
| East Asia      | 2012 | 0.868837 | 0.683317 |
| East Asia      | 2013 | 0.864019 | 0.674571 |
| East Asia      | 2014 | 0.860397 | 0.670162 |
| East Asia      | 2015 | 0.851087 | 0.659093 |
| East Asia      | 2016 | 0.854883 | 0.658215 |
| East Asia      | 2017 | 0.873032 | 0.671291 |
| East Asia      | 2018 | 0.892832 | 0.68718  |
| East Asia      | 2019 | 0.901698 | 0.691723 |
| Eastern Europe | 1990 | 1.23365  | 0.659579 |
| Eastern Europe | 1991 | 1.234032 | 0.661635 |
| Eastern Europe | 1992 | 1.179967 | 0.645697 |
| Eastern Europe | 1993 | 1.111938 | 0.629129 |

1  
2  
3  
4  
5  
6  
7  
8  
9  
10  
11  
12  
13  
14  
15  
16  
17  
18  
19  
20  
21  
22  
23  
24  
25  
26  
27  
28  
29  
30  
31  
32  
33  
34  
35  
36  
37  
38  
39  
40  
41  
42  
43  
44  
45  
46

|                |      |          |          |
|----------------|------|----------|----------|
| Eastern Europe | 1994 | 1.083014 | 0.624362 |
| Eastern Europe | 1995 | 1.097775 | 0.626929 |
| Eastern Europe | 1996 | 1.136801 | 0.636876 |
| Eastern Europe | 1997 | 1.189719 | 0.652769 |
| Eastern Europe | 1998 | 1.200466 | 0.655556 |
| Eastern Europe | 1999 | 1.165156 | 0.646959 |
| Eastern Europe | 2000 | 1.133588 | 0.634773 |
| Eastern Europe | 2001 | 1.144775 | 0.639602 |
| Eastern Europe | 2002 | 1.145428 | 0.641292 |
| Eastern Europe | 2003 | 1.148307 | 0.645278 |
| Eastern Europe | 2004 | 1.147171 | 0.643072 |
| Eastern Europe | 2005 | 1.129964 | 0.635679 |
| Eastern Europe | 2006 | 1.160568 | 0.640647 |

|                |      |          |          |
|----------------|------|----------|----------|
| Eastern Europe | 2007 | 1.178074 | 0.645161 |
| Eastern Europe | 2008 | 1.173178 | 0.640809 |
| Eastern Europe | 2009 | 1.213267 | 0.652961 |
| Eastern Europe | 2010 | 1.216113 | 0.651057 |
| Eastern Europe | 2011 | 1.24856  | 0.661311 |
| Eastern Europe | 2012 | 1.26107  | 0.663132 |
| Eastern Europe | 2013 | 1.276739 | 0.668352 |
| Eastern Europe | 2014 | 1.282237 | 0.669976 |
| Eastern Europe | 2015 | 1.273576 | 0.668279 |
| Eastern Europe | 2016 | 1.293772 | 0.676652 |
| Eastern Europe | 2017 | 1.330071 | 0.693054 |
| Eastern Europe | 2018 | 1.325354 | 0.691408 |
| Eastern Europe | 2019 | 1.316541 | 0.688636 |

1  
2  
3  
4  
5  
6  
7  
8  
9  
10  
11  
12  
13  
14  
15  
16  
17  
18  
19  
20  
21  
22  
23  
24  
25  
26  
27  
28  
29  
30  
31  
32  
33  
34  
35  
36  
37  
38  
39  
40  
41  
42  
43  
44  
45  
46

|                            |      |          |          |
|----------------------------|------|----------|----------|
| Eastern Sub-Saharan Africa | 1990 | 0.723735 | 0.659766 |
| Eastern Sub-Saharan Africa | 1991 | 0.716556 | 0.652735 |
| Eastern Sub-Saharan Africa | 1992 | 0.71224  | 0.648871 |
| Eastern Sub-Saharan Africa | 1993 | 0.705678 | 0.643593 |
| Eastern Sub-Saharan Africa | 1994 | 0.702762 | 0.640668 |
| Eastern Sub-Saharan Africa | 1995 | 0.698844 | 0.636628 |
| Eastern Sub-Saharan Africa | 1996 | 0.697362 | 0.635147 |
| Eastern Sub-Saharan Africa | 1997 | 0.698754 | 0.636152 |
| Eastern Sub-Saharan Africa | 1998 | 0.702868 | 0.639227 |
| Eastern Sub-Saharan Africa | 1999 | 0.705082 | 0.639977 |
| Eastern Sub-Saharan Africa | 2000 | 0.700715 | 0.635388 |
| Eastern Sub-Saharan Africa | 2001 | 0.699235 | 0.632593 |
| Eastern Sub-Saharan Africa | 2002 | 0.700728 | 0.632842 |

|                            |      |          |          |
|----------------------------|------|----------|----------|
| Eastern Sub-Saharan Africa | 2003 | 0.702876 | 0.634288 |
| Eastern Sub-Saharan Africa | 2004 | 0.704983 | 0.635906 |
| Eastern Sub-Saharan Africa | 2005 | 0.708518 | 0.638477 |
| Eastern Sub-Saharan Africa | 2006 | 0.707323 | 0.63662  |
| Eastern Sub-Saharan Africa | 2007 | 0.705661 | 0.634556 |
| Eastern Sub-Saharan Africa | 2008 | 0.703491 | 0.632789 |
| Eastern Sub-Saharan Africa | 2009 | 0.706474 | 0.635204 |
| Eastern Sub-Saharan Africa | 2010 | 0.711105 | 0.639797 |
| Eastern Sub-Saharan Africa | 2011 | 0.718351 | 0.646421 |
| Eastern Sub-Saharan Africa | 2012 | 0.723635 | 0.651391 |
| Eastern Sub-Saharan Africa | 2013 | 0.730521 | 0.657747 |
| Eastern Sub-Saharan Africa | 2014 | 0.735582 | 0.663012 |
| Eastern Sub-Saharan Africa | 2015 | 0.741687 | 0.668864 |



|                            |      |          |          |
|----------------------------|------|----------|----------|
| Eastern Sub-Saharan Africa | 2016 | 0.745789 | 0.673767 |
| Eastern Sub-Saharan Africa | 2017 | 0.752803 | 0.681804 |
| Eastern Sub-Saharan Africa | 2018 | 0.757852 | 0.687995 |
| Eastern Sub-Saharan Africa | 2019 | 0.762287 | 0.693751 |
| High-income Asia Pacific   | 1990 | 1.039751 | 0.667137 |
| High-income Asia Pacific   | 1991 | 1.043418 | 0.661266 |
| High-income Asia Pacific   | 1992 | 1.054406 | 0.660081 |
| High-income Asia Pacific   | 1993 | 1.065479 | 0.660206 |
| High-income Asia Pacific   | 1994 | 1.074912 | 0.660328 |
| High-income Asia Pacific   | 1995 | 1.08229  | 0.66066  |
| High-income Asia Pacific   | 1996 | 1.099512 | 0.667777 |
| High-income Asia Pacific   | 1997 | 1.103374 | 0.665346 |
| High-income Asia Pacific   | 1998 | 1.090814 | 0.652463 |

|                          |      |          |          |
|--------------------------|------|----------|----------|
| High-income Asia Pacific | 1999 | 1.080631 | 0.640419 |
| High-income Asia Pacific | 2000 | 1.077246 | 0.633324 |
| High-income Asia Pacific | 2001 | 1.078976 | 0.628989 |
| High-income Asia Pacific | 2002 | 1.083506 | 0.625751 |
| High-income Asia Pacific | 2003 | 1.079641 | 0.618161 |
| High-income Asia Pacific | 2004 | 1.086294 | 0.616881 |
| High-income Asia Pacific | 2005 | 1.078453 | 0.606349 |
| High-income Asia Pacific | 2006 | 1.085594 | 0.604766 |
| High-income Asia Pacific | 2007 | 1.076784 | 0.596348 |
| High-income Asia Pacific | 2008 | 1.064816 | 0.586519 |
| High-income Asia Pacific | 2009 | 1.046166 | 0.57464  |
| High-income Asia Pacific | 2010 | 1.038285 | 0.567576 |
| High-income Asia Pacific | 2011 | 1.055017 | 0.574227 |

|                           |      |          |          |
|---------------------------|------|----------|----------|
| High-income Asia Pacific  | 2012 | 1.065024 | 0.578891 |
| High-income Asia Pacific  | 2013 | 1.07446  | 0.584658 |
| High-income Asia Pacific  | 2014 | 1.080257 | 0.589475 |
| High-income Asia Pacific  | 2015 | 1.084531 | 0.590498 |
| High-income Asia Pacific  | 2016 | 1.093062 | 0.595518 |
| High-income Asia Pacific  | 2017 | 1.092684 | 0.597114 |
| High-income Asia Pacific  | 2018 | 1.106932 | 0.607797 |
| High-income Asia Pacific  | 2019 | 1.109359 | 0.612461 |
| High-income North America | 1990 | 1.118132 | 0.672668 |
| High-income North America | 1991 | 1.117006 | 0.672201 |
| High-income North America | 1992 | 1.115077 | 0.671045 |
| High-income North America | 1993 | 1.113464 | 0.670112 |
| High-income North America | 1994 | 1.122594 | 0.675419 |

|                           |      |          |          |
|---------------------------|------|----------|----------|
| High-income North America | 1995 | 1.124872 | 0.677823 |
| High-income North America | 1996 | 1.141051 | 0.688329 |
| High-income North America | 1997 | 1.152169 | 0.697537 |
| High-income North America | 1998 | 1.158742 | 0.704401 |
| High-income North America | 1999 | 1.166107 | 0.713378 |
| High-income North America | 2000 | 1.177151 | 0.724467 |
| High-income North America | 2001 | 1.177024 | 0.729607 |
| High-income North America | 2002 | 1.16057  | 0.723799 |
| High-income North America | 2003 | 1.151264 | 0.723251 |
| High-income North America | 2004 | 1.157041 | 0.731177 |
| High-income North America | 2005 | 1.157996 | 0.736166 |
| High-income North America | 2006 | 1.168287 | 0.747508 |
| High-income North America | 2007 | 1.174861 | 0.756554 |

|                              |      |          |          |
|------------------------------|------|----------|----------|
| High-income North America    | 2008 | 1.157709 | 0.751119 |
| High-income North America    | 2009 | 1.138461 | 0.745004 |
| High-income North America    | 2010 | 1.115781 | 0.735584 |
| High-income North America    | 2011 | 1.103844 | 0.734535 |
| High-income North America    | 2012 | 1.083181 | 0.727639 |
| High-income North America    | 2013 | 1.057522 | 0.717919 |
| High-income North America    | 2014 | 1.05067  | 0.720224 |
| High-income North America    | 2015 | 1.041592 | 0.720859 |
| High-income North America    | 2016 | 1.023499 | 0.715467 |
| High-income North America    | 2017 | 1.003664 | 0.707465 |
| High-income North America    | 2018 | 0.977158 | 0.692149 |
| High-income North America    | 2019 | 0.996235 | 0.70587  |
| North Africa and Middle East | 1990 | 0.992053 | 0.929902 |

|                              |      |          |          |
|------------------------------|------|----------|----------|
| North Africa and Middle East | 1991 | 0.999587 | 0.945749 |
| North Africa and Middle East | 1992 | 0.9933   | 0.945798 |
| North Africa and Middle East | 1993 | 0.991348 | 0.94837  |
| North Africa and Middle East | 1994 | 0.994314 | 0.95637  |
| North Africa and Middle East | 1995 | 0.992249 | 0.956899 |
| North Africa and Middle East | 1996 | 0.997432 | 0.963296 |
| North Africa and Middle East | 1997 | 0.988848 | 0.952588 |
| North Africa and Middle East | 1998 | 0.984311 | 0.946822 |
| North Africa and Middle East | 1999 | 0.989991 | 0.956975 |
| North Africa and Middle East | 2000 | 0.99719  | 0.973325 |
| North Africa and Middle East | 2001 | 0.988859 | 0.958619 |
| North Africa and Middle East | 2002 | 0.972092 | 0.932539 |
| North Africa and Middle East | 2003 | 0.965162 | 0.921957 |

1  
2  
3  
4  
5  
6  
7  
8  
9  
10  
11  
12  
13  
14  
15  
16  
17  
18  
19  
20  
21  
22  
23  
24  
25  
26  
27  
28  
29  
30  
31  
32  
33  
34  
35  
36  
37  
38  
39  
40  
41  
42  
43  
44  
45  
46

|                              |      |          |          |
|------------------------------|------|----------|----------|
| North Africa and Middle East | 2004 | 0.972897 | 0.926071 |
| North Africa and Middle East | 2005 | 0.989718 | 0.947247 |
| North Africa and Middle East | 2006 | 1.004557 | 0.974732 |
| North Africa and Middle East | 2007 | 1.01095  | 0.99362  |
| North Africa and Middle East | 2008 | 1.017714 | 1.012304 |
| North Africa and Middle East | 2009 | 1.015727 | 1.017749 |
| North Africa and Middle East | 2010 | 1.014014 | 1.01966  |
| North Africa and Middle East | 2011 | 1.001629 | 1.011346 |
| North Africa and Middle East | 2012 | 1.002972 | 1.013633 |
| North Africa and Middle East | 2013 | 0.984389 | 0.993935 |
| North Africa and Middle East | 2014 | 0.990925 | 1.001141 |
| North Africa and Middle East | 2015 | 1.002549 | 1.012016 |
| North Africa and Middle East | 2016 | 1.010398 | 1.021392 |

|                              |      |          |          |
|------------------------------|------|----------|----------|
| North Africa and Middle East | 2017 | 1.014892 | 1.02737  |
| North Africa and Middle East | 2018 | 1.018101 | 1.032525 |
| North Africa and Middle East | 2019 | 1.017794 | 1.032346 |
| Oceania                      | 1990 | 0.714981 | 0.712764 |
| Oceania                      | 1991 | 0.713966 | 0.709276 |
| Oceania                      | 1992 | 0.715391 | 0.707661 |
| Oceania                      | 1993 | 0.716127 | 0.705628 |
| Oceania                      | 1994 | 0.717851 | 0.704957 |
| Oceania                      | 1995 | 0.720437 | 0.708679 |
| Oceania                      | 1996 | 0.728436 | 0.718749 |
| Oceania                      | 1997 | 0.73471  | 0.724774 |
| Oceania                      | 1998 | 0.74027  | 0.731    |
| Oceania                      | 1999 | 0.740747 | 0.73015  |



|         |      |          |          |
|---------|------|----------|----------|
| Oceania | 2000 | 0.739459 | 0.729167 |
| Oceania | 2001 | 0.732115 | 0.724288 |
| Oceania | 2002 | 0.737227 | 0.727466 |
| Oceania | 2003 | 0.745093 | 0.73641  |
| Oceania | 2004 | 0.743631 | 0.734994 |
| Oceania | 2005 | 0.727771 | 0.719476 |
| Oceania | 2006 | 0.721573 | 0.712822 |
| Oceania | 2007 | 0.715807 | 0.705716 |
| Oceania | 2008 | 0.711278 | 0.705836 |
| Oceania | 2009 | 0.708497 | 0.704765 |
| Oceania | 2010 | 0.697016 | 0.695086 |
| Oceania | 2011 | 0.685978 | 0.686528 |
| Oceania | 2012 | 0.677235 | 0.68009  |

|            |      |          |          |
|------------|------|----------|----------|
| Oceania    | 2013 | 0.672653 | 0.677716 |
| Oceania    | 2014 | 0.668907 | 0.674571 |
| Oceania    | 2015 | 0.668124 | 0.67487  |
| Oceania    | 2016 | 0.667828 | 0.674982 |
| Oceania    | 2017 | 0.664246 | 0.672026 |
| Oceania    | 2018 | 0.659172 | 0.669561 |
| Oceania    | 2019 | 0.660332 | 0.672439 |
| South Asia | 1990 | 0.66507  | 0.698583 |
| South Asia | 1991 | 0.661937 | 0.69396  |
| South Asia | 1992 | 0.675911 | 0.704971 |
| South Asia | 1993 | 0.671216 | 0.699226 |
| South Asia | 1994 | 0.670005 | 0.695142 |
| South Asia | 1995 | 0.673903 | 0.695892 |

1  
2  
3  
4  
5  
6  
7  
8  
9  
10  
11  
12  
13  
14  
15  
16  
17  
18  
19  
20  
21  
22  
23  
24  
25  
26  
27  
28  
29  
30  
31  
32  
33  
34  
35  
36  
37  
38  
39  
40  
41  
42  
43  
44  
45  
46

|            |      |          |          |
|------------|------|----------|----------|
| South Asia | 1996 | 0.673456 | 0.689668 |
| South Asia | 1997 | 0.675591 | 0.688244 |
| South Asia | 1998 | 0.68373  | 0.697407 |
| South Asia | 1999 | 0.682567 | 0.698546 |
| South Asia | 2000 | 0.669169 | 0.681507 |
| South Asia | 2001 | 0.669284 | 0.679742 |
| South Asia | 2002 | 0.667592 | 0.676094 |
| South Asia | 2003 | 0.654533 | 0.65867  |
| South Asia | 2004 | 0.648943 | 0.64878  |
| South Asia | 2005 | 0.646784 | 0.643141 |
| South Asia | 2006 | 0.64926  | 0.645759 |
| South Asia | 2007 | 0.650865 | 0.646551 |
| South Asia | 2008 | 0.644718 | 0.637315 |

|                |      |          |          |
|----------------|------|----------|----------|
| South Asia     | 2009 | 0.648902 | 0.634807 |
| South Asia     | 2010 | 0.661674 | 0.639831 |
| South Asia     | 2011 | 0.666136 | 0.642593 |
| South Asia     | 2012 | 0.677551 | 0.653581 |
| South Asia     | 2013 | 0.700175 | 0.664938 |
| South Asia     | 2014 | 0.725503 | 0.679458 |
| South Asia     | 2015 | 0.75062  | 0.703432 |
| South Asia     | 2016 | 0.752504 | 0.708796 |
| South Asia     | 2017 | 0.754074 | 0.711262 |
| South Asia     | 2018 | 0.755202 | 0.708314 |
| South Asia     | 2019 | 0.759717 | 0.712613 |
| Southeast Asia | 1990 | 0.996027 | 0.865118 |
| Southeast Asia | 1991 | 0.986435 | 0.857618 |

1  
2  
3  
4  
5  
6  
7  
8  
9  
10  
11  
12  
13  
14  
15  
16  
17  
18  
19  
20  
21  
22  
23  
24  
25  
26  
27  
28  
29  
30  
31  
32  
33  
34  
35  
36  
37  
38  
39  
40  
41  
42  
43  
44  
45  
46

|                |      |          |          |
|----------------|------|----------|----------|
| Southeast Asia | 1992 | 0.979521 | 0.851068 |
| Southeast Asia | 1993 | 0.975002 | 0.847726 |
| Southeast Asia | 1994 | 0.966841 | 0.841815 |
| Southeast Asia | 1995 | 0.959653 | 0.8355   |
| Southeast Asia | 1996 | 0.958879 | 0.833157 |
| Southeast Asia | 1997 | 0.967228 | 0.835268 |
| Southeast Asia | 1998 | 0.968374 | 0.828115 |
| Southeast Asia | 1999 | 0.974419 | 0.832331 |
| Southeast Asia | 2000 | 0.982661 | 0.837888 |
| Southeast Asia | 2001 | 0.989978 | 0.845043 |
| Southeast Asia | 2002 | 1.00304  | 0.857111 |
| Southeast Asia | 2003 | 1.00702  | 0.86077  |
| Southeast Asia | 2004 | 1.010903 | 0.865647 |

|                |      |          |          |
|----------------|------|----------|----------|
| Southeast Asia | 2005 | 1.009594 | 0.864883 |
| Southeast Asia | 2006 | 1.006894 | 0.863283 |
| Southeast Asia | 2007 | 1.004802 | 0.862165 |
| Southeast Asia | 2008 | 0.998931 | 0.857502 |
| Southeast Asia | 2009 | 0.993168 | 0.853077 |
| Southeast Asia | 2010 | 0.985052 | 0.846161 |
| Southeast Asia | 2011 | 0.972286 | 0.836049 |
| Southeast Asia | 2012 | 0.961676 | 0.827129 |
| Southeast Asia | 2013 | 0.957614 | 0.824501 |
| Southeast Asia | 2014 | 0.947844 | 0.816169 |
| Southeast Asia | 2015 | 0.944072 | 0.811403 |
| Southeast Asia | 2016 | 0.944548 | 0.810911 |
| Southeast Asia | 2017 | 0.954061 | 0.817224 |

1  
2  
3  
4  
5  
6  
7  
8  
9  
10  
11  
12  
13  
14  
15  
16  
17  
18  
19  
20  
21  
22  
23  
24  
25  
26  
27  
28  
29  
30  
31  
32  
33  
34  
35  
36  
37  
38  
39  
40  
41  
42  
43  
44  
45  
46

|                        |      |          |          |
|------------------------|------|----------|----------|
| Southeast Asia         | 2018 | 0.963672 | 0.823881 |
| Southeast Asia         | 2019 | 0.970656 | 0.827904 |
| Southern Latin America | 1990 | 0.836852 | 0.615026 |
| Southern Latin America | 1991 | 0.840997 | 0.616255 |
| Southern Latin America | 1992 | 0.838523 | 0.611796 |
| Southern Latin America | 1993 | 0.846781 | 0.613563 |
| Southern Latin America | 1994 | 0.858913 | 0.620038 |
| Southern Latin America | 1995 | 0.870687 | 0.623389 |
| Southern Latin America | 1996 | 0.877568 | 0.623542 |
| Southern Latin America | 1997 | 0.900245 | 0.635494 |
| Southern Latin America | 1998 | 0.924286 | 0.646916 |
| Southern Latin America | 1999 | 0.940666 | 0.653284 |
| Southern Latin America | 2000 | 0.951995 | 0.657239 |

|                        |      |          |          |
|------------------------|------|----------|----------|
| Southern Latin America | 2001 | 0.954878 | 0.65674  |
| Southern Latin America | 2002 | 0.947038 | 0.648019 |
| Southern Latin America | 2003 | 0.954421 | 0.648565 |
| Southern Latin America | 2004 | 0.958557 | 0.647573 |
| Southern Latin America | 2005 | 0.957894 | 0.645642 |
| Southern Latin America | 2006 | 0.968127 | 0.651186 |
| Southern Latin America | 2007 | 0.96893  | 0.649748 |
| Southern Latin America | 2008 | 0.980789 | 0.657073 |
| Southern Latin America | 2009 | 0.982553 | 0.65619  |
| Southern Latin America | 2010 | 0.995161 | 0.660136 |
| Southern Latin America | 2011 | 1.000659 | 0.661048 |
| Southern Latin America | 2012 | 0.997452 | 0.658189 |
| Southern Latin America | 2013 | 1.004457 | 0.661778 |



|                             |      |          |          |
|-----------------------------|------|----------|----------|
| Southern Latin America      | 2014 | 1.008837 | 0.663532 |
| Southern Latin America      | 2015 | 1.005479 | 0.661634 |
| Southern Latin America      | 2016 | 0.998337 | 0.657825 |
| Southern Latin America      | 2017 | 0.994391 | 0.65736  |
| Southern Latin America      | 2018 | 0.995722 | 0.662491 |
| Southern Latin America      | 2019 | 0.992334 | 0.66318  |
| Southern Sub-Saharan Africa | 1990 | 0.799727 | 0.566804 |
| Southern Sub-Saharan Africa | 1991 | 0.776829 | 0.54927  |
| Southern Sub-Saharan Africa | 1992 | 0.820106 | 0.577714 |
| Southern Sub-Saharan Africa | 1993 | 0.774803 | 0.54824  |
| Southern Sub-Saharan Africa | 1994 | 0.788186 | 0.555732 |
| Southern Sub-Saharan Africa | 1995 | 0.709621 | 0.502163 |
| Southern Sub-Saharan Africa | 1996 | 0.706395 | 0.498609 |

|                             |      |          |          |
|-----------------------------|------|----------|----------|
| Southern Sub-Saharan Africa | 1997 | 0.742709 | 0.519068 |
| Southern Sub-Saharan Africa | 1998 | 0.733636 | 0.510162 |
| Southern Sub-Saharan Africa | 1999 | 0.753431 | 0.518147 |
| Southern Sub-Saharan Africa | 2000 | 0.778592 | 0.53112  |
| Southern Sub-Saharan Africa | 2001 | 0.780906 | 0.52916  |
| Southern Sub-Saharan Africa | 2002 | 0.791602 | 0.532937 |
| Southern Sub-Saharan Africa | 2003 | 0.798728 | 0.534572 |
| Southern Sub-Saharan Africa | 2004 | 0.802828 | 0.536106 |
| Southern Sub-Saharan Africa | 2005 | 0.800053 | 0.534634 |
| Southern Sub-Saharan Africa | 2006 | 0.805583 | 0.537221 |
| Southern Sub-Saharan Africa | 2007 | 0.802574 | 0.536309 |
| Southern Sub-Saharan Africa | 2008 | 0.807065 | 0.539654 |
| Southern Sub-Saharan Africa | 2009 | 0.812728 | 0.542922 |

1  
2  
3  
4  
5  
6  
7  
8  
9  
10  
11  
12  
13  
14  
15  
16  
17  
18  
19  
20  
21  
22  
23  
24  
25  
26  
27  
28  
29  
30  
31  
32  
33  
34  
35  
36  
37  
38  
39  
40  
41  
42  
43  
44  
45  
46

|                             |      |          |          |
|-----------------------------|------|----------|----------|
| Southern Sub-Saharan Africa | 2010 | 0.815654 | 0.542544 |
| Southern Sub-Saharan Africa | 2011 | 0.825888 | 0.547379 |
| Southern Sub-Saharan Africa | 2012 | 0.83456  | 0.554376 |
| Southern Sub-Saharan Africa | 2013 | 0.843888 | 0.56142  |
| Southern Sub-Saharan Africa | 2014 | 0.858826 | 0.572506 |
| Southern Sub-Saharan Africa | 2015 | 0.861626 | 0.576232 |
| Southern Sub-Saharan Africa | 2016 | 0.862458 | 0.57647  |
| Southern Sub-Saharan Africa | 2017 | 0.850199 | 0.571158 |
| Southern Sub-Saharan Africa | 2018 | 0.834525 | 0.564877 |
| Southern Sub-Saharan Africa | 2019 | 0.832604 | 0.566608 |
| Tropical Latin America      | 1990 | 0.868384 | 0.734218 |
| Tropical Latin America      | 1991 | 0.871664 | 0.732863 |
| Tropical Latin America      | 1992 | 0.872822 | 0.730195 |

|                        |      |          |          |
|------------------------|------|----------|----------|
| Tropical Latin America | 1993 | 0.870659 | 0.725086 |
| Tropical Latin America | 1994 | 0.872989 | 0.725556 |
| Tropical Latin America | 1995 | 0.8882   | 0.736898 |
| Tropical Latin America | 1996 | 0.90161  | 0.748706 |
| Tropical Latin America | 1997 | 0.912623 | 0.755214 |
| Tropical Latin America | 1998 | 0.915054 | 0.754469 |
| Tropical Latin America | 1999 | 0.919973 | 0.756125 |
| Tropical Latin America | 2000 | 0.92274  | 0.755265 |
| Tropical Latin America | 2001 | 0.92301  | 0.75235  |
| Tropical Latin America | 2002 | 0.925579 | 0.750251 |
| Tropical Latin America | 2003 | 0.914222 | 0.737044 |
| Tropical Latin America | 2004 | 0.908803 | 0.729144 |
| Tropical Latin America | 2005 | 0.909014 | 0.726955 |

1  
2  
3  
4  
5  
6  
7  
8  
9  
10  
11  
12  
13  
14  
15  
16  
17  
18  
19  
20  
21  
22  
23  
24  
25  
26  
27  
28  
29  
30  
31  
32  
33  
34  
35  
36  
37  
38  
39  
40  
41  
42  
43  
44  
45  
46

|                        |      |          |          |
|------------------------|------|----------|----------|
| Tropical Latin America | 2006 | 0.914548 | 0.728219 |
| Tropical Latin America | 2007 | 0.91622  | 0.726039 |
| Tropical Latin America | 2008 | 0.918839 | 0.724886 |
| Tropical Latin America | 2009 | 0.924596 | 0.725983 |
| Tropical Latin America | 2010 | 0.927897 | 0.724711 |
| Tropical Latin America | 2011 | 0.927844 | 0.721599 |
| Tropical Latin America | 2012 | 0.930201 | 0.720433 |
| Tropical Latin America | 2013 | 0.92795  | 0.715936 |
| Tropical Latin America | 2014 | 0.925154 | 0.711512 |
| Tropical Latin America | 2015 | 0.925393 | 0.70904  |
| Tropical Latin America | 2016 | 0.917662 | 0.700946 |
| Tropical Latin America | 2017 | 0.92015  | 0.701317 |
| Tropical Latin America | 2018 | 0.927136 | 0.707273 |

|                        |      |          |          |
|------------------------|------|----------|----------|
| Tropical Latin America | 2019 | 0.922426 | 0.703827 |
| Western Europe         | 1990 | 1.187221 | 0.636881 |
| Western Europe         | 1991 | 1.17978  | 0.631171 |
| Western Europe         | 1992 | 1.179064 | 0.629347 |
| Western Europe         | 1993 | 1.181449 | 0.629072 |
| Western Europe         | 1994 | 1.189826 | 0.632836 |
| Western Europe         | 1995 | 1.191172 | 0.631937 |
| Western Europe         | 1996 | 1.195132 | 0.632473 |
| Western Europe         | 1997 | 1.206631 | 0.637573 |
| Western Europe         | 1998 | 1.213062 | 0.641914 |
| Western Europe         | 1999 | 1.216683 | 0.643583 |
| Western Europe         | 2000 | 1.234761 | 0.651178 |
| Western Europe         | 2001 | 1.2483   | 0.658031 |

1  
2  
3  
4  
5  
6  
7  
8  
9  
10  
11  
12  
13  
14  
15  
16  
17  
18  
19  
20  
21  
22  
23  
24  
25  
26  
27  
28  
29  
30  
31  
32  
33  
34  
35  
36  
37  
38  
39  
40  
41  
42  
43  
44  
45  
46

|                |      |          |          |
|----------------|------|----------|----------|
| Western Europe | 2002 | 1.257153 | 0.663607 |
| Western Europe | 2003 | 1.260606 | 0.667379 |
| Western Europe | 2004 | 1.27021  | 0.674738 |
| Western Europe | 2005 | 1.276144 | 0.679276 |
| Western Europe | 2006 | 1.279993 | 0.683381 |
| Western Europe | 2007 | 1.283076 | 0.68944  |
| Western Europe | 2008 | 1.289726 | 0.697937 |
| Western Europe | 2009 | 1.287437 | 0.701796 |
| Western Europe | 2010 | 1.288567 | 0.70405  |
| Western Europe | 2011 | 1.303959 | 0.711458 |
| Western Europe | 2012 | 1.310276 | 0.715725 |
| Western Europe | 2013 | 1.313979 | 0.720856 |
| Western Europe | 2014 | 1.317178 | 0.725604 |

|                            |      |          |          |
|----------------------------|------|----------|----------|
| Western Europe             | 2015 | 1.310931 | 0.726156 |
| Western Europe             | 2016 | 1.310262 | 0.730428 |
| Western Europe             | 2017 | 1.285904 | 0.726461 |
| Western Europe             | 2018 | 1.279483 | 0.731767 |
| Western Europe             | 2019 | 1.263779 | 0.731772 |
| Western Sub-Saharan Africa | 1990 | 0.943231 | 0.876176 |
| Western Sub-Saharan Africa | 1991 | 0.93766  | 0.874746 |
| Western Sub-Saharan Africa | 1992 | 0.931574 | 0.874356 |
| Western Sub-Saharan Africa | 1993 | 0.922468 | 0.87055  |
| Western Sub-Saharan Africa | 1994 | 0.915253 | 0.867589 |
| Western Sub-Saharan Africa | 1995 | 0.906125 | 0.861331 |
| Western Sub-Saharan Africa | 1996 | 0.896934 | 0.855647 |
| Western Sub-Saharan Africa | 1997 | 0.893333 | 0.854683 |



1  
2  
3  
4  
5  
6  
7  
8  
9  
10  
11  
12  
13  
14  
15  
16  
17  
18  
19  
20  
21  
22  
23  
24  
25  
26  
27  
28  
29  
30  
31  
32  
33  
34  
35  
36  
37  
38  
39  
40  
41  
42  
43  
44  
45  
46

|                            |      |          |          |
|----------------------------|------|----------|----------|
| Western Sub-Saharan Africa | 1998 | 0.884804 | 0.84926  |
| Western Sub-Saharan Africa | 1999 | 0.870291 | 0.83736  |
| Western Sub-Saharan Africa | 2000 | 0.86047  | 0.828306 |
| Western Sub-Saharan Africa | 2001 | 0.852357 | 0.822349 |
| Western Sub-Saharan Africa | 2002 | 0.846533 | 0.817614 |
| Western Sub-Saharan Africa | 2003 | 0.839041 | 0.812645 |
| Western Sub-Saharan Africa | 2004 | 0.830404 | 0.80605  |
| Western Sub-Saharan Africa | 2005 | 0.822259 | 0.798324 |
| Western Sub-Saharan Africa | 2006 | 0.817552 | 0.793607 |
| Western Sub-Saharan Africa | 2007 | 0.812308 | 0.787728 |
| Western Sub-Saharan Africa | 2008 | 0.805224 | 0.779451 |
| Western Sub-Saharan Africa | 2009 | 0.79906  | 0.771461 |
| Western Sub-Saharan Africa | 2010 | 0.794901 | 0.76539  |

|                            |      |          |          |
|----------------------------|------|----------|----------|
| Western Sub-Saharan Africa | 2011 | 0.793234 | 0.761174 |
| Western Sub-Saharan Africa | 2012 | 0.793325 | 0.757741 |
| Western Sub-Saharan Africa | 2013 | 0.790147 | 0.750627 |
| Western Sub-Saharan Africa | 2014 | 0.79643  | 0.752517 |
| Western Sub-Saharan Africa | 2015 | 0.804319 | 0.755615 |
| Western Sub-Saharan Africa | 2016 | 0.812327 | 0.759468 |
| Western Sub-Saharan Africa | 2017 | 0.822265 | 0.764697 |
| Western Sub-Saharan Africa | 2018 | 0.830106 | 0.768468 |
| Western Sub-Saharan Africa | 2019 | 0.839655 | 0.773633 |

1  
2  
3  
4  
5  
6  
7  
8  
9  
10  
11  
12  
13  
14  
15  
16  
17  
18  
19  
20  
21  
22  
23  
24  
25  
26  
27  
28  
29  
30  
31  
32  
33  
34  
35  
36  
37  
38  
39  
40  
41  
42  
43  
44  
45  
46

**Supplemental table 6. Death cases ratio between females to males and age-standardized death rate (ASDR) ratio between females to males in 204 countries and territories from 1990 to 2019 in 204 countries.**

| location    | year | Ratio of female to male death cases | Ratio of female ASDR to male ASDR |
|-------------|------|-------------------------------------|-----------------------------------|
| Afghanistan | 1990 | 0.961218                            | 0.963112                          |
| Afghanistan | 1991 | 0.961054                            | 0.95357                           |
| Afghanistan | 1992 | 0.957648                            | 0.93756                           |
| Afghanistan | 1993 | 0.960475                            | 0.930057                          |
| Afghanistan | 1994 | 0.965727                            | 0.927966                          |
| Afghanistan | 1995 | 0.967031                            | 0.922941                          |
| Afghanistan | 1996 | 0.96932                             | 0.918637                          |
| Afghanistan | 1997 | 0.969684                            | 0.912595                          |
| Afghanistan | 1998 | 0.972555                            | 0.909395                          |
| Afghanistan | 1999 | 0.980011                            | 0.90888                           |
| Afghanistan | 2000 | 0.985626                            | 0.909379                          |
| Afghanistan | 2001 | 0.993832                            | 0.910933                          |
| Afghanistan | 2002 | 1.000351                            | 0.912563                          |
| Afghanistan | 2003 | 1.015199                            | 0.919405                          |
| Afghanistan | 2004 | 1.036288                            | 0.930023                          |
| Afghanistan | 2005 | 1.050515                            | 0.939235                          |
| Afghanistan | 2006 | 1.060058                            | 0.943996                          |
| Afghanistan | 2007 | 1.06658                             | 0.947329                          |
| Afghanistan | 2008 | 1.078541                            | 0.954077                          |
| Afghanistan | 2009 | 1.09462                             | 0.962852                          |
| Afghanistan | 2010 | 1.110446                            | 0.974819                          |

|    |             |      |          |          |
|----|-------------|------|----------|----------|
| 1  |             |      |          |          |
| 2  |             |      |          |          |
| 3  |             |      |          |          |
| 4  |             |      |          |          |
| 5  | Afghanistan | 2011 | 1.121862 | 0.982551 |
| 6  | Afghanistan | 2012 | 1.126085 | 0.985505 |
| 7  | Afghanistan | 2013 | 1.135187 | 0.991014 |
| 8  | Afghanistan | 2014 | 1.143462 | 0.994594 |
| 9  | Afghanistan | 2015 | 1.148955 | 1.000242 |
| 10 | Afghanistan | 2016 | 1.158044 | 1.008886 |
| 11 | Afghanistan | 2017 | 1.170556 | 1.019302 |
| 12 | Afghanistan | 2018 | 1.180678 | 1.02524  |
| 13 | Afghanistan | 2019 | 1.191846 | 1.032065 |
| 14 | Albania     | 1990 | 0.80288  | 0.611067 |
| 15 | Albania     | 1991 | 0.824545 | 0.633067 |
| 16 | Albania     | 1992 | 0.847876 | 0.64608  |
| 17 | Albania     | 1993 | 0.8389   | 0.634173 |
| 18 | Albania     | 1994 | 0.851827 | 0.63936  |
| 19 | Albania     | 1995 | 0.863218 | 0.645539 |
| 20 | Albania     | 1996 | 0.835124 | 0.620725 |
| 21 | Albania     | 1997 | 0.820214 | 0.614118 |
| 22 | Albania     | 1998 | 0.796342 | 0.603217 |
| 23 | Albania     | 1999 | 0.836725 | 0.632571 |
| 24 | Albania     | 2000 | 0.801031 | 0.607676 |
| 25 | Albania     | 2001 | 0.800875 | 0.612752 |
| 26 | Albania     | 2002 | 0.818988 | 0.631664 |
| 27 | Albania     | 2003 | 0.829379 | 0.645643 |
| 28 | Albania     | 2004 | 0.814148 | 0.640171 |
| 29 | Albania     | 2005 | 0.844958 | 0.66871  |
| 30 |             |      |          |          |
| 31 |             |      |          |          |
| 32 |             |      |          |          |
| 33 |             |      |          |          |
| 34 |             |      |          |          |
| 35 |             |      |          |          |
| 36 |             |      |          |          |
| 37 |             |      |          |          |
| 38 |             |      |          |          |
| 39 |             |      |          |          |
| 40 |             |      |          |          |
| 41 |             |      |          |          |
| 42 |             |      |          |          |
| 43 |             |      |          |          |
| 44 |             |      |          |          |
| 45 |             |      |          |          |
| 46 |             |      |          |          |

1  
2  
3  
4  
5  
6  
7  
8  
9  
10  
11  
12  
13  
14  
15  
16  
17  
18  
19  
20  
21  
22  
23  
24  
25  
26  
27  
28  
29  
30  
31  
32  
33  
34  
35  
36  
37  
38  
39  
40  
41  
42  
43  
44  
45  
46

|         |      |          |          |
|---------|------|----------|----------|
| Albania | 2006 | 0.861627 | 0.685951 |
| Albania | 2007 | 0.878193 | 0.701901 |
| Albania | 2008 | 0.873395 | 0.701159 |
| Albania | 2009 | 0.851996 | 0.687584 |
| Albania | 2010 | 0.836195 | 0.676588 |
| Albania | 2011 | 0.829811 | 0.676367 |
| Albania | 2012 | 0.835089 | 0.683686 |
| Albania | 2013 | 0.835903 | 0.687582 |
| Albania | 2014 | 0.819922 | 0.678315 |
| Albania | 2015 | 0.807743 | 0.670891 |
| Albania | 2016 | 0.816522 | 0.677372 |
| Albania | 2017 | 0.824754 | 0.682594 |
| Albania | 2018 | 0.833083 | 0.687361 |
| Albania | 2019 | 0.84051  | 0.691033 |
| Algeria | 1990 | 1.109457 | 1.137995 |
| Algeria | 1991 | 1.109573 | 1.103907 |
| Algeria | 1992 | 1.104276 | 1.086803 |
| Algeria | 1993 | 1.099944 | 1.074033 |
| Algeria | 1994 | 1.107022 | 1.066426 |
| Algeria | 1995 | 1.109373 | 1.065159 |
| Algeria | 1996 | 1.112722 | 1.065549 |
| Algeria | 1997 | 1.105399 | 1.055999 |
| Algeria | 1998 | 1.093316 | 1.043813 |
| Algeria | 1999 | 1.103667 | 1.053381 |
| Algeria | 2000 | 1.110872 | 1.065961 |

|    |                |      |          |          |
|----|----------------|------|----------|----------|
| 1  |                |      |          |          |
| 2  |                |      |          |          |
| 3  |                |      |          |          |
| 4  |                |      |          |          |
| 5  | Algeria        | 2001 | 1.113195 | 1.075515 |
| 6  | Algeria        | 2002 | 1.11772  | 1.088375 |
| 7  | Algeria        | 2003 | 1.119067 | 1.111271 |
| 8  | Algeria        | 2004 | 1.136506 | 1.142565 |
| 9  | Algeria        | 2005 | 1.14715  | 1.169811 |
| 10 | Algeria        | 2006 | 1.15201  | 1.190973 |
| 11 | Algeria        | 2007 | 1.155168 | 1.209171 |
| 12 | Algeria        | 2008 | 1.15859  | 1.228457 |
| 13 | Algeria        | 2009 | 1.163619 | 1.248209 |
| 14 | Algeria        | 2010 | 1.177218 | 1.286784 |
| 15 | Algeria        | 2011 | 1.186641 | 1.312148 |
| 16 | Algeria        | 2012 | 1.189601 | 1.324703 |
| 17 | Algeria        | 2013 | 1.204505 | 1.349103 |
| 18 | Algeria        | 2014 | 1.219508 | 1.372427 |
| 19 | Algeria        | 2015 | 1.223912 | 1.38569  |
| 20 | Algeria        | 2016 | 1.212958 | 1.379575 |
| 21 | Algeria        | 2017 | 1.211995 | 1.380939 |
| 22 | Algeria        | 2018 | 1.241531 | 1.414697 |
| 23 | Algeria        | 2019 | 1.249033 | 1.426351 |
| 24 | American Samoa | 1990 | 0.612611 | 0.596702 |
| 25 | American Samoa | 1991 | 0.61697  | 0.598437 |
| 26 | American Samoa | 1992 | 0.631844 | 0.608174 |
| 27 | American Samoa | 1993 | 0.653989 | 0.623514 |
| 28 | American Samoa | 1994 | 0.681528 | 0.645433 |
| 29 | American Samoa | 1995 | 0.704734 | 0.662102 |
| 30 |                |      |          |          |
| 31 |                |      |          |          |
| 32 |                |      |          |          |
| 33 |                |      |          |          |
| 34 |                |      |          |          |
| 35 |                |      |          |          |
| 36 |                |      |          |          |
| 37 |                |      |          |          |
| 38 |                |      |          |          |
| 39 |                |      |          |          |
| 40 |                |      |          |          |
| 41 |                |      |          |          |
| 42 |                |      |          |          |
| 43 |                |      |          |          |
| 44 |                |      |          |          |
| 45 |                |      |          |          |
| 46 |                |      |          |          |

|                |      |          |          |
|----------------|------|----------|----------|
| American Samoa | 1996 | 0.730556 | 0.680042 |
| American Samoa | 1997 | 0.750686 | 0.692616 |
| American Samoa | 1998 | 0.768062 | 0.702708 |
| American Samoa | 1999 | 0.803672 | 0.728942 |
| American Samoa | 2000 | 0.82894  | 0.746903 |
| American Samoa | 2001 | 0.858097 | 0.770038 |
| American Samoa | 2002 | 0.853244 | 0.762156 |
| American Samoa | 2003 | 0.879136 | 0.781717 |
| American Samoa | 2004 | 0.893409 | 0.791329 |
| American Samoa | 2005 | 0.864685 | 0.762067 |
| American Samoa | 2006 | 0.856831 | 0.751596 |
| American Samoa | 2007 | 0.840159 | 0.734654 |
| American Samoa | 2008 | 0.82017  | 0.71572  |
| American Samoa | 2009 | 0.807269 | 0.703181 |
| American Samoa | 2010 | 0.797999 | 0.692814 |
| American Samoa | 2011 | 0.806261 | 0.69851  |
| American Samoa | 2012 | 0.825197 | 0.714836 |
| American Samoa | 2013 | 0.829821 | 0.719759 |
| American Samoa | 2014 | 0.829493 | 0.720731 |
| American Samoa | 2015 | 0.835253 | 0.726995 |
| American Samoa | 2016 | 0.834591 | 0.726271 |
| American Samoa | 2017 | 0.83428  | 0.726919 |
| American Samoa | 2018 | 0.833313 | 0.727019 |
| American Samoa | 2019 | 0.832801 | 0.72741  |
| Andorra        | 1990 | 0.788861 | 0.729791 |

|    |         |      |          |          |
|----|---------|------|----------|----------|
| 1  |         |      |          |          |
| 2  |         |      |          |          |
| 3  |         |      |          |          |
| 4  |         |      |          |          |
| 5  | Andorra | 1991 | 0.777657 | 0.721833 |
| 6  | Andorra | 1992 | 0.786613 | 0.72433  |
| 7  | Andorra | 1993 | 0.799267 | 0.736144 |
| 8  | Andorra | 1994 | 0.822512 | 0.748494 |
| 9  | Andorra | 1995 | 0.815241 | 0.73957  |
| 10 | Andorra | 1996 | 0.812205 | 0.734919 |
| 11 | Andorra | 1997 | 0.819344 | 0.731837 |
| 12 | Andorra | 1998 | 0.822769 | 0.728802 |
| 13 | Andorra | 1999 | 0.83361  | 0.726268 |
| 14 | Andorra | 2000 | 0.838352 | 0.725112 |
| 15 | Andorra | 2001 | 0.84257  | 0.723152 |
| 16 | Andorra | 2002 | 0.857376 | 0.721192 |
| 17 | Andorra | 2003 | 0.855856 | 0.717126 |
| 18 | Andorra | 2004 | 0.880115 | 0.725276 |
| 19 | Andorra | 2005 | 0.88978  | 0.727032 |
| 20 | Andorra | 2006 | 0.905426 | 0.732969 |
| 21 | Andorra | 2007 | 0.920575 | 0.73044  |
| 22 | Andorra | 2008 | 0.930871 | 0.739732 |
| 23 | Andorra | 2009 | 0.966364 | 0.755799 |
| 24 | Andorra | 2010 | 0.984365 | 0.766113 |
| 25 | Andorra | 2011 | 1.019081 | 0.772799 |
| 26 | Andorra | 2012 | 1.070344 | 0.791319 |
| 27 | Andorra | 2013 | 1.089581 | 0.811453 |
| 28 | Andorra | 2014 | 1.126724 | 0.832771 |
| 29 | Andorra | 2015 | 1.162229 | 0.859118 |
| 30 |         |      |          |          |
| 31 |         |      |          |          |
| 32 |         |      |          |          |
| 33 |         |      |          |          |
| 34 |         |      |          |          |
| 35 |         |      |          |          |
| 36 |         |      |          |          |
| 37 |         |      |          |          |
| 38 |         |      |          |          |
| 39 |         |      |          |          |
| 40 |         |      |          |          |
| 41 |         |      |          |          |
| 42 |         |      |          |          |
| 43 |         |      |          |          |
| 44 |         |      |          |          |
| 45 |         |      |          |          |
| 46 |         |      |          |          |



|    |         |      |          |          |
|----|---------|------|----------|----------|
| 1  |         |      |          |          |
| 2  |         |      |          |          |
| 3  |         |      |          |          |
| 4  |         |      |          |          |
| 5  | Andorra | 2016 | 1.164998 | 0.860014 |
| 6  | Andorra | 2017 | 1.180541 | 0.862883 |
| 7  | Andorra | 2018 | 1.169541 | 0.866757 |
| 8  | Andorra | 2019 | 1.178874 | 0.871085 |
| 9  |         |      |          |          |
| 10 | Angola  | 1990 | 0.537106 | 0.457811 |
| 11 | Angola  | 1991 | 0.544217 | 0.460671 |
| 12 | Angola  | 1992 | 0.551135 | 0.46428  |
| 13 | Angola  | 1993 | 0.559343 | 0.468348 |
| 14 | Angola  | 1994 | 0.567008 | 0.47207  |
| 15 | Angola  | 1995 | 0.57392  | 0.474355 |
| 16 | Angola  | 1996 | 0.582053 | 0.476191 |
| 17 | Angola  | 1997 | 0.592023 | 0.480883 |
| 18 | Angola  | 1998 | 0.602272 | 0.487081 |
| 19 | Angola  | 1999 | 0.616042 | 0.494658 |
| 20 | Angola  | 2000 | 0.625475 | 0.49915  |
| 21 | Angola  | 2001 | 0.625067 | 0.497084 |
| 22 | Angola  | 2002 | 0.651311 | 0.513815 |
| 23 | Angola  | 2003 | 0.668571 | 0.527179 |
| 24 | Angola  | 2004 | 0.671047 | 0.528362 |
| 25 | Angola  | 2005 | 0.66996  | 0.528374 |
| 26 | Angola  | 2006 | 0.653598 | 0.518225 |
| 27 | Angola  | 2007 | 0.639537 | 0.508693 |
| 28 | Angola  | 2008 | 0.641562 | 0.510323 |
| 29 | Angola  | 2009 | 0.636395 | 0.509296 |
| 30 | Angola  | 2010 | 0.633737 | 0.507852 |
| 31 |         |      |          |          |
| 32 |         |      |          |          |
| 33 |         |      |          |          |
| 34 |         |      |          |          |
| 35 |         |      |          |          |
| 36 |         |      |          |          |
| 37 |         |      |          |          |
| 38 |         |      |          |          |
| 39 |         |      |          |          |
| 40 |         |      |          |          |
| 41 |         |      |          |          |
| 42 |         |      |          |          |
| 43 |         |      |          |          |
| 44 |         |      |          |          |
| 45 |         |      |          |          |
| 46 |         |      |          |          |

|                     |      |          |          |
|---------------------|------|----------|----------|
| Angola              | 2011 | 0.627955 | 0.505033 |
| Angola              | 2012 | 0.619494 | 0.500108 |
| Angola              | 2013 | 0.615684 | 0.497491 |
| Angola              | 2014 | 0.611861 | 0.494839 |
| Angola              | 2015 | 0.618424 | 0.500956 |
| Angola              | 2016 | 0.629456 | 0.509579 |
| Angola              | 2017 | 0.635562 | 0.517839 |
| Angola              | 2018 | 0.641232 | 0.523674 |
| Angola              | 2019 | 0.647501 | 0.530396 |
| Antigua and Barbuda | 1990 | 0.666514 | 0.446543 |
| Antigua and Barbuda | 1991 | 0.715685 | 0.478107 |
| Antigua and Barbuda | 1992 | 0.714282 | 0.479608 |
| Antigua and Barbuda | 1993 | 0.732266 | 0.493697 |
| Antigua and Barbuda | 1994 | 0.736436 | 0.499464 |
| Antigua and Barbuda | 1995 | 0.737658 | 0.502559 |
| Antigua and Barbuda | 1996 | 0.834084 | 0.578888 |
| Antigua and Barbuda | 1997 | 0.849233 | 0.599587 |
| Antigua and Barbuda | 1998 | 0.856383 | 0.615655 |
| Antigua and Barbuda | 1999 | 0.86549  | 0.631337 |
| Antigua and Barbuda | 2000 | 0.88497  | 0.654818 |
| Antigua and Barbuda | 2001 | 0.922952 | 0.693046 |
| Antigua and Barbuda | 2002 | 0.937509 | 0.716928 |
| Antigua and Barbuda | 2003 | 0.931884 | 0.725553 |
| Antigua and Barbuda | 2004 | 0.928461 | 0.73322  |
| Antigua and Barbuda | 2005 | 0.915143 | 0.734142 |

1  
2  
3  
4  
5  
6  
7  
8  
9  
10  
11  
12  
13  
14  
15  
16  
17  
18  
19  
20  
21  
22  
23  
24  
25  
26  
27  
28  
29  
30  
31  
32  
33  
34  
35  
36  
37  
38  
39  
40  
41  
42  
43  
44  
45  
46

|                     |      |          |          |
|---------------------|------|----------|----------|
| Antigua and Barbuda | 2006 | 0.886643 | 0.717462 |
| Antigua and Barbuda | 2007 | 0.737094 | 0.586594 |
| Antigua and Barbuda | 2008 | 0.740284 | 0.585623 |
| Antigua and Barbuda | 2009 | 0.834307 | 0.66124  |
| Antigua and Barbuda | 2010 | 0.855069 | 0.67682  |
| Antigua and Barbuda | 2011 | 0.878277 | 0.69395  |
| Antigua and Barbuda | 2012 | 0.910791 | 0.720486 |
| Antigua and Barbuda | 2013 | 0.946769 | 0.754748 |
| Antigua and Barbuda | 2014 | 0.946533 | 0.756041 |
| Antigua and Barbuda | 2015 | 0.944465 | 0.754486 |
| Antigua and Barbuda | 2016 | 0.949086 | 0.759164 |
| Antigua and Barbuda | 2017 | 0.961636 | 0.775668 |
| Antigua and Barbuda | 2018 | 0.955232 | 0.775363 |
| Antigua and Barbuda | 2019 | 0.938257 | 0.764103 |
| Argentina           | 1990 | 0.816301 | 0.592396 |
| Argentina           | 1991 | 0.81505  | 0.589561 |
| Argentina           | 1992 | 0.809108 | 0.582187 |
| Argentina           | 1993 | 0.820178 | 0.585302 |
| Argentina           | 1994 | 0.835615 | 0.593134 |
| Argentina           | 1995 | 0.852727 | 0.599872 |
| Argentina           | 1996 | 0.864933 | 0.604446 |
| Argentina           | 1997 | 0.887958 | 0.615809 |
| Argentina           | 1998 | 0.911821 | 0.626255 |
| Argentina           | 1999 | 0.926667 | 0.630847 |
| Argentina           | 2000 | 0.937797 | 0.633938 |

|           |      |          |          |
|-----------|------|----------|----------|
| Argentina | 2001 | 0.936522 | 0.629952 |
| Argentina | 2002 | 0.926919 | 0.620389 |
| Argentina | 2003 | 0.93253  | 0.619629 |
| Argentina | 2004 | 0.932059 | 0.61577  |
| Argentina | 2005 | 0.927467 | 0.611552 |
| Argentina | 2006 | 0.939197 | 0.617824 |
| Argentina | 2007 | 0.941492 | 0.617118 |
| Argentina | 2008 | 0.95441  | 0.62448  |
| Argentina | 2009 | 0.959719 | 0.625646 |
| Argentina | 2010 | 0.973276 | 0.629635 |
| Argentina | 2011 | 0.975477 | 0.628524 |
| Argentina | 2012 | 0.967782 | 0.622803 |
| Argentina | 2013 | 0.976495 | 0.626864 |
| Argentina | 2014 | 0.98453  | 0.630903 |
| Argentina | 2015 | 0.977509 | 0.626764 |
| Argentina | 2016 | 0.966372 | 0.620702 |
| Argentina | 2017 | 0.958121 | 0.617106 |
| Argentina | 2018 | 0.958598 | 0.622691 |
| Argentina | 2019 | 0.954191 | 0.623212 |
| Armenia   | 1990 | 0.780068 | 0.518728 |
| Armenia   | 1991 | 0.765191 | 0.508548 |
| Armenia   | 1992 | 0.777493 | 0.518524 |
| Armenia   | 1993 | 0.769502 | 0.514966 |
| Armenia   | 1994 | 0.767158 | 0.520619 |
| Armenia   | 1995 | 0.837447 | 0.570209 |

|           |      |          |          |
|-----------|------|----------|----------|
| Armenia   | 1996 | 0.883948 | 0.61161  |
| Armenia   | 1997 | 0.932501 | 0.658905 |
| Armenia   | 1998 | 0.992186 | 0.709891 |
| Armenia   | 1999 | 0.977642 | 0.704145 |
| Armenia   | 2000 | 0.989377 | 0.713448 |
| Armenia   | 2001 | 0.993407 | 0.722184 |
| Armenia   | 2002 | 0.975439 | 0.707534 |
| Armenia   | 2003 | 0.984779 | 0.705606 |
| Armenia   | 2004 | 0.973642 | 0.687817 |
| Armenia   | 2005 | 0.955851 | 0.670541 |
| Armenia   | 2006 | 0.928028 | 0.650275 |
| Armenia   | 2007 | 1.000884 | 0.697835 |
| Armenia   | 2008 | 0.930024 | 0.654575 |
| Armenia   | 2009 | 0.907739 | 0.639381 |
| Armenia   | 2010 | 0.891967 | 0.618215 |
| Armenia   | 2011 | 0.858252 | 0.593996 |
| Armenia   | 2012 | 0.895746 | 0.620641 |
| Armenia   | 2013 | 0.90243  | 0.62339  |
| Armenia   | 2014 | 0.879924 | 0.604729 |
| Armenia   | 2015 | 0.827098 | 0.568261 |
| Armenia   | 2016 | 0.836569 | 0.574202 |
| Armenia   | 2017 | 0.838073 | 0.573061 |
| Armenia   | 2018 | 0.837492 | 0.569781 |
| Armenia   | 2019 | 0.833053 | 0.566864 |
| Australia | 1990 | 1.294494 | 0.755478 |

|           |      |          |          |
|-----------|------|----------|----------|
| Australia | 1991 | 1.288997 | 0.756474 |
| Australia | 1992 | 1.268926 | 0.745579 |
| Australia | 1993 | 1.241153 | 0.728202 |
| Australia | 1994 | 1.226829 | 0.71809  |
| Australia | 1995 | 1.231699 | 0.722381 |
| Australia | 1996 | 1.205226 | 0.709841 |
| Australia | 1997 | 1.191066 | 0.708118 |
| Australia | 1998 | 1.152601 | 0.688628 |
| Australia | 1999 | 1.152189 | 0.689831 |
| Australia | 2000 | 1.138176 | 0.683865 |
| Australia | 2001 | 1.12561  | 0.679441 |
| Australia | 2002 | 1.117703 | 0.674985 |
| Australia | 2003 | 1.095849 | 0.664528 |
| Australia | 2004 | 1.115103 | 0.677657 |
| Australia | 2005 | 1.135883 | 0.692902 |
| Australia | 2006 | 1.143659 | 0.700868 |
| Australia | 2007 | 1.154737 | 0.713041 |
| Australia | 2008 | 1.155029 | 0.717956 |
| Australia | 2009 | 1.164055 | 0.73019  |
| Australia | 2010 | 1.152713 | 0.728706 |
| Australia | 2011 | 1.141979 | 0.729099 |
| Australia | 2012 | 1.137162 | 0.734577 |
| Australia | 2013 | 1.125903 | 0.736751 |
| Australia | 2014 | 1.120436 | 0.740431 |
| Australia | 2015 | 1.10876  | 0.740356 |

1  
2  
3  
4  
5  
6  
7  
8  
9  
10  
11  
12  
13  
14  
15  
16  
17  
18  
19  
20  
21  
22  
23  
24  
25  
26  
27  
28  
29  
30  
31  
32  
33  
34  
35  
36  
37  
38  
39  
40  
41  
42  
43  
44  
45  
46

|           |      |          |          |
|-----------|------|----------|----------|
| Australia | 2016 | 1.102751 | 0.742331 |
| Australia | 2017 | 1.080546 | 0.734664 |
| Australia | 2018 | 1.068638 | 0.734484 |
| Australia | 2019 | 1.053569 | 0.730815 |
| Austria   | 1990 | 1.516235 | 0.715717 |
| Austria   | 1991 | 1.500515 | 0.705711 |
| Austria   | 1992 | 1.491132 | 0.697389 |
| Austria   | 1993 | 1.491922 | 0.696126 |
| Austria   | 1994 | 1.498083 | 0.695299 |
| Austria   | 1995 | 1.517538 | 0.698785 |
| Austria   | 1996 | 1.50472  | 0.689712 |
| Austria   | 1997 | 1.501237 | 0.682791 |
| Austria   | 1998 | 1.494367 | 0.680545 |
| Austria   | 1999 | 1.525297 | 0.695688 |
| Austria   | 2000 | 1.552982 | 0.710282 |
| Austria   | 2001 | 1.556454 | 0.717181 |
| Austria   | 2002 | 1.552057 | 0.722238 |
| Austria   | 2003 | 1.575332 | 0.743031 |
| Austria   | 2004 | 1.543781 | 0.734121 |
| Austria   | 2005 | 1.566323 | 0.744065 |
| Austria   | 2006 | 1.565154 | 0.746048 |
| Austria   | 2007 | 1.574945 | 0.754747 |
| Austria   | 2008 | 1.579287 | 0.761531 |
| Austria   | 2009 | 1.5496   | 0.756153 |
| Austria   | 2010 | 1.565489 | 0.765797 |

|            |      |          |          |
|------------|------|----------|----------|
| Austria    | 2011 | 1.588252 | 0.779744 |
| Austria    | 2012 | 1.601134 | 0.789644 |
| Austria    | 2013 | 1.61478  | 0.803998 |
| Austria    | 2014 | 1.618171 | 0.816704 |
| Austria    | 2015 | 1.585412 | 0.805686 |
| Austria    | 2016 | 1.587994 | 0.814803 |
| Austria    | 2017 | 1.567843 | 0.81588  |
| Austria    | 2018 | 1.545369 | 0.82056  |
| Austria    | 2019 | 1.510565 | 0.817641 |
| Azerbaijan | 1990 | 0.884919 | 0.65096  |
| Azerbaijan | 1991 | 0.863564 | 0.647523 |
| Azerbaijan | 1992 | 0.804415 | 0.631196 |
| Azerbaijan | 1993 | 0.807115 | 0.640708 |
| Azerbaijan | 1994 | 0.824097 | 0.657869 |
| Azerbaijan | 1995 | 0.899597 | 0.689805 |
| Azerbaijan | 1996 | 0.926688 | 0.699384 |
| Azerbaijan | 1997 | 0.933708 | 0.708992 |
| Azerbaijan | 1998 | 0.951881 | 0.72596  |
| Azerbaijan | 1999 | 0.959192 | 0.7351   |
| Azerbaijan | 2000 | 0.953873 | 0.735509 |
| Azerbaijan | 2001 | 0.94505  | 0.732781 |
| Azerbaijan | 2002 | 0.929063 | 0.726587 |
| Azerbaijan | 2003 | 0.922196 | 0.729547 |
| Azerbaijan | 2004 | 0.911869 | 0.736815 |
| Azerbaijan | 2005 | 0.903185 | 0.741571 |



|    |            |      |          |          |
|----|------------|------|----------|----------|
| 1  |            |      |          |          |
| 2  |            |      |          |          |
| 3  |            |      |          |          |
| 4  |            |      |          |          |
| 5  | Azerbaijan | 2006 | 0.897948 | 0.739822 |
| 6  | Azerbaijan | 2007 | 0.893294 | 0.736339 |
| 7  | Azerbaijan | 2008 | 0.88655  | 0.739216 |
| 8  | Azerbaijan | 2009 | 0.895969 | 0.749957 |
| 9  | Azerbaijan | 2010 | 0.897182 | 0.756723 |
| 10 | Azerbaijan | 2011 | 0.886579 | 0.749297 |
| 11 | Azerbaijan | 2012 | 0.889392 | 0.748078 |
| 12 | Azerbaijan | 2013 | 0.896214 | 0.759684 |
| 13 | Azerbaijan | 2014 | 0.915751 | 0.771163 |
| 14 | Azerbaijan | 2015 | 0.928454 | 0.781904 |
| 15 | Azerbaijan | 2016 | 0.941756 | 0.786452 |
| 16 | Azerbaijan | 2017 | 0.948794 | 0.792003 |
| 17 | Azerbaijan | 2018 | 0.959219 | 0.807247 |
| 18 | Azerbaijan | 2019 | 0.964069 | 0.81359  |
| 19 | Bahamas    | 1990 | 0.86923  | 0.637024 |
| 20 | Bahamas    | 1991 | 0.873246 | 0.641249 |
| 21 | Bahamas    | 1992 | 0.886863 | 0.654543 |
| 22 | Bahamas    | 1993 | 0.874838 | 0.651853 |
| 23 | Bahamas    | 1994 | 0.865065 | 0.646329 |
| 24 | Bahamas    | 1995 | 0.858317 | 0.644723 |
| 25 | Bahamas    | 1996 | 0.882475 | 0.662296 |
| 26 | Bahamas    | 1997 | 0.890227 | 0.668356 |
| 27 | Bahamas    | 1998 | 0.896911 | 0.667434 |
| 28 | Bahamas    | 1999 | 0.913152 | 0.670192 |
| 29 | Bahamas    | 2000 | 0.946792 | 0.688855 |
| 30 |            |      |          |          |
| 31 |            |      |          |          |
| 32 |            |      |          |          |
| 33 |            |      |          |          |
| 34 |            |      |          |          |
| 35 |            |      |          |          |
| 36 |            |      |          |          |
| 37 |            |      |          |          |
| 38 |            |      |          |          |
| 39 |            |      |          |          |
| 40 |            |      |          |          |
| 41 |            |      |          |          |
| 42 |            |      |          |          |
| 43 |            |      |          |          |
| 44 |            |      |          |          |
| 45 |            |      |          |          |
| 46 |            |      |          |          |

|         |      |          |          |
|---------|------|----------|----------|
| Bahamas | 2001 | 0.933287 | 0.683256 |
| Bahamas | 2002 | 0.961431 | 0.708425 |
| Bahamas | 2003 | 0.980276 | 0.723078 |
| Bahamas | 2004 | 0.969473 | 0.729096 |
| Bahamas | 2005 | 0.976416 | 0.747939 |
| Bahamas | 2006 | 0.965569 | 0.746845 |
| Bahamas | 2007 | 0.959604 | 0.750593 |
| Bahamas | 2008 | 0.937636 | 0.735607 |
| Bahamas | 2009 | 0.95849  | 0.756095 |
| Bahamas | 2010 | 0.962004 | 0.755122 |
| Bahamas | 2011 | 0.94786  | 0.745734 |
| Bahamas | 2012 | 0.940035 | 0.743227 |
| Bahamas | 2013 | 0.993174 | 0.800607 |
| Bahamas | 2014 | 0.966604 | 0.786467 |
| Bahamas | 2015 | 0.93935  | 0.758471 |
| Bahamas | 2016 | 0.934359 | 0.754261 |
| Bahamas | 2017 | 0.929223 | 0.75145  |
| Bahamas | 2018 | 0.912342 | 0.733095 |
| Bahamas | 2019 | 0.901126 | 0.718165 |
| Bahrain | 1990 | 0.96846  | 1.011246 |
| Bahrain | 1991 | 0.955936 | 0.993367 |
| Bahrain | 1992 | 0.958204 | 1.008735 |
| Bahrain | 1993 | 0.960542 | 1.032361 |
| Bahrain | 1994 | 0.914769 | 0.98154  |
| Bahrain | 1995 | 0.867259 | 0.918159 |

1  
2  
3  
4  
5  
6  
7  
8  
9  
10  
11  
12  
13  
14  
15  
16  
17  
18  
19  
20  
21  
22  
23  
24  
25  
26  
27  
28  
29  
30  
31  
32  
33  
34  
35  
36  
37  
38  
39  
40  
41  
42  
43  
44  
45  
46

|            |      |          |          |
|------------|------|----------|----------|
| Bahrain    | 1996 | 0.880086 | 0.927939 |
| Bahrain    | 1997 | 0.841479 | 0.867421 |
| Bahrain    | 1998 | 0.897658 | 0.909906 |
| Bahrain    | 1999 | 0.990692 | 1.012986 |
| Bahrain    | 2000 | 0.997978 | 1.079099 |
| Bahrain    | 2001 | 0.962072 | 1.099497 |
| Bahrain    | 2002 | 0.944778 | 1.025992 |
| Bahrain    | 2003 | 0.88681  | 0.932096 |
| Bahrain    | 2004 | 0.893684 | 0.94323  |
| Bahrain    | 2005 | 0.879997 | 0.951966 |
| Bahrain    | 2006 | 0.845168 | 0.936137 |
| Bahrain    | 2007 | 0.816137 | 0.921743 |
| Bahrain    | 2008 | 0.771081 | 0.894059 |
| Bahrain    | 2009 | 0.739982 | 0.877059 |
| Bahrain    | 2010 | 0.703531 | 0.858101 |
| Bahrain    | 2011 | 0.690148 | 0.841018 |
| Bahrain    | 2012 | 0.696111 | 0.81503  |
| Bahrain    | 2013 | 0.724384 | 0.856791 |
| Bahrain    | 2014 | 0.754134 | 0.915374 |
| Bahrain    | 2015 | 0.761763 | 0.942064 |
| Bahrain    | 2016 | 0.781626 | 0.985433 |
| Bahrain    | 2017 | 0.787411 | 1.010453 |
| Bahrain    | 2018 | 0.761454 | 0.999448 |
| Bahrain    | 2019 | 0.75058  | 1.006894 |
| Bangladesh | 1990 | 0.3804   | 0.716382 |

|            |      |          |          |
|------------|------|----------|----------|
| Bangladesh | 1991 | 0.375512 | 0.70697  |
| Bangladesh | 1992 | 0.395376 | 0.732929 |
| Bangladesh | 1993 | 0.404917 | 0.739799 |
| Bangladesh | 1994 | 0.4091   | 0.741698 |
| Bangladesh | 1995 | 0.419216 | 0.749634 |
| Bangladesh | 1996 | 0.415382 | 0.737888 |
| Bangladesh | 1997 | 0.41797  | 0.73412  |
| Bangladesh | 1998 | 0.43435  | 0.780599 |
| Bangladesh | 1999 | 0.454088 | 0.839102 |
| Bangladesh | 2000 | 0.453657 | 0.843641 |
| Bangladesh | 2001 | 0.459795 | 0.853859 |
| Bangladesh | 2002 | 0.467849 | 0.862316 |
| Bangladesh | 2003 | 0.464491 | 0.839155 |
| Bangladesh | 2004 | 0.462154 | 0.815733 |
| Bangladesh | 2005 | 0.466528 | 0.798544 |
| Bangladesh | 2006 | 0.46469  | 0.773923 |
| Bangladesh | 2007 | 0.454664 | 0.734806 |
| Bangladesh | 2008 | 0.464322 | 0.733483 |
| Bangladesh | 2009 | 0.490683 | 0.758337 |
| Bangladesh | 2010 | 0.52175  | 0.778736 |
| Bangladesh | 2011 | 0.542118 | 0.797312 |
| Bangladesh | 2012 | 0.565715 | 0.822096 |
| Bangladesh | 2013 | 0.586354 | 0.836184 |
| Bangladesh | 2014 | 0.60748  | 0.848881 |
| Bangladesh | 2015 | 0.637512 | 0.868537 |

1  
2  
3  
4  
5  
6  
7  
8  
9  
10  
11  
12  
13  
14  
15  
16  
17  
18  
19  
20  
21  
22  
23  
24  
25  
26  
27  
28  
29  
30  
31  
32  
33  
34  
35  
36  
37  
38  
39  
40  
41  
42  
43  
44  
45  
46

|            |      |          |          |
|------------|------|----------|----------|
| Bangladesh | 2016 | 0.660278 | 0.882671 |
| Bangladesh | 2017 | 0.678338 | 0.88952  |
| Bangladesh | 2018 | 0.698971 | 0.899008 |
| Bangladesh | 2019 | 0.718894 | 0.907048 |
| Barbados   | 1990 | 0.894527 | 0.616642 |
| Barbados   | 1991 | 0.905157 | 0.626068 |
| Barbados   | 1992 | 0.886093 | 0.614058 |
| Barbados   | 1993 | 0.840365 | 0.584046 |
| Barbados   | 1994 | 0.798121 | 0.552412 |
| Barbados   | 1995 | 0.797847 | 0.547842 |
| Barbados   | 1996 | 0.802923 | 0.548148 |
| Barbados   | 1997 | 0.829481 | 0.563764 |
| Barbados   | 1998 | 0.91285  | 0.619466 |
| Barbados   | 1999 | 1.051021 | 0.713134 |
| Barbados   | 2000 | 1.129813 | 0.771219 |
| Barbados   | 2001 | 1.164329 | 0.804694 |
| Barbados   | 2002 | 1.098412 | 0.766947 |
| Barbados   | 2003 | 1.060014 | 0.743981 |
| Barbados   | 2004 | 1.049906 | 0.73631  |
| Barbados   | 2005 | 1.035049 | 0.730984 |
| Barbados   | 2006 | 1.025381 | 0.726048 |
| Barbados   | 2007 | 1.03494  | 0.730463 |
| Barbados   | 2008 | 1.071119 | 0.755906 |
| Barbados   | 2009 | 1.186422 | 0.840113 |
| Barbados   | 2010 | 1.20559  | 0.861409 |

|    |          |      |          |          |
|----|----------|------|----------|----------|
| 1  |          |      |          |          |
| 2  |          |      |          |          |
| 3  |          |      |          |          |
| 4  |          |      |          |          |
| 5  | Barbados | 2011 | 1.256207 | 0.903078 |
| 6  | Barbados | 2012 | 1.232002 | 0.894855 |
| 7  | Barbados | 2013 | 1.244512 | 0.910245 |
| 8  | Barbados | 2014 | 1.226329 | 0.90563  |
| 9  | Barbados | 2015 | 1.219095 | 0.909021 |
| 10 | Barbados | 2016 | 1.20731  | 0.908776 |
| 11 | Barbados | 2017 | 1.18224  | 0.898411 |
| 12 | Barbados | 2018 | 1.136632 | 0.87408  |
| 13 | Barbados | 2019 | 1.057898 | 0.823784 |
| 14 | Belarus  | 1990 | 1.222737 | 0.546785 |
| 15 | Belarus  | 1991 | 1.222589 | 0.542306 |
| 16 | Belarus  | 1992 | 1.222354 | 0.541995 |
| 17 | Belarus  | 1993 | 1.194195 | 0.528192 |
| 18 | Belarus  | 1994 | 1.198027 | 0.525786 |
| 19 | Belarus  | 1995 | 1.190682 | 0.524236 |
| 20 | Belarus  | 1996 | 1.19779  | 0.529672 |
| 21 | Belarus  | 1997 | 1.201862 | 0.530403 |
| 22 | Belarus  | 1998 | 1.180566 | 0.522256 |
| 23 | Belarus  | 1999 | 1.17349  | 0.525554 |
| 24 | Belarus  | 2000 | 1.181038 | 0.537008 |
| 25 | Belarus  | 2001 | 1.11243  | 0.527535 |
| 26 | Belarus  | 2002 | 0.992516 | 0.514932 |
| 27 | Belarus  | 2003 | 0.965662 | 0.512927 |
| 28 | Belarus  | 2004 | 0.987739 | 0.51748  |
| 29 | Belarus  | 2005 | 0.949344 | 0.490265 |
| 30 |          |      |          |          |
| 31 |          |      |          |          |
| 32 |          |      |          |          |
| 33 |          |      |          |          |
| 34 |          |      |          |          |
| 35 |          |      |          |          |
| 36 |          |      |          |          |
| 37 |          |      |          |          |
| 38 |          |      |          |          |
| 39 |          |      |          |          |
| 40 |          |      |          |          |
| 41 |          |      |          |          |
| 42 |          |      |          |          |
| 43 |          |      |          |          |
| 44 |          |      |          |          |
| 45 |          |      |          |          |
| 46 |          |      |          |          |

|         |      |          |          |
|---------|------|----------|----------|
| Belarus | 2006 | 0.967082 | 0.492058 |
| Belarus | 2007 | 1.016222 | 0.523081 |
| Belarus | 2008 | 0.997675 | 0.511675 |
| Belarus | 2009 | 1.034343 | 0.52553  |
| Belarus | 2010 | 1.035253 | 0.522242 |
| Belarus | 2011 | 1.052963 | 0.526143 |
| Belarus | 2012 | 1.118591 | 0.540565 |
| Belarus | 2013 | 1.163733 | 0.552405 |
| Belarus | 2014 | 1.170396 | 0.54707  |
| Belarus | 2015 | 1.17895  | 0.546572 |
| Belarus | 2016 | 1.200354 | 0.553718 |
| Belarus | 2017 | 1.181    | 0.545909 |
| Belarus | 2018 | 1.181577 | 0.547002 |
| Belarus | 2019 | 1.173258 | 0.544368 |
| Belgium | 1990 | 1.421385 | 0.740877 |
| Belgium | 1991 | 1.423942 | 0.735281 |
| Belgium | 1992 | 1.445789 | 0.734188 |
| Belgium | 1993 | 1.462333 | 0.731138 |
| Belgium | 1994 | 1.49978  | 0.74798  |
| Belgium | 1995 | 1.496972 | 0.743446 |
| Belgium | 1996 | 1.496832 | 0.734692 |
| Belgium | 1997 | 1.509634 | 0.737004 |
| Belgium | 1998 | 1.514908 | 0.74002  |
| Belgium | 1999 | 1.502728 | 0.733028 |
| Belgium | 2000 | 1.557667 | 0.760407 |

|    |         |      |          |          |
|----|---------|------|----------|----------|
| 1  |         |      |          |          |
| 2  |         |      |          |          |
| 3  |         |      |          |          |
| 4  |         |      |          |          |
| 5  | Belgium | 2001 | 1.583938 | 0.775911 |
| 6  | Belgium | 2002 | 1.586992 | 0.779042 |
| 7  | Belgium | 2003 | 1.581673 | 0.780405 |
| 8  | Belgium | 2004 | 1.568962 | 0.781184 |
| 9  | Belgium | 2005 | 1.5535   | 0.78059  |
| 10 | Belgium | 2006 | 1.536952 | 0.778674 |
| 11 | Belgium | 2007 | 1.518508 | 0.773984 |
| 12 | Belgium | 2008 | 1.485609 | 0.766927 |
| 13 | Belgium | 2009 | 1.472726 | 0.767742 |
| 14 | Belgium | 2010 | 1.455233 | 0.765906 |
| 15 | Belgium | 2011 | 1.438783 | 0.760722 |
| 16 | Belgium | 2012 | 1.407827 | 0.747317 |
| 17 | Belgium | 2013 | 1.420968 | 0.757718 |
| 18 | Belgium | 2014 | 1.426814 | 0.762059 |
| 19 | Belgium | 2015 | 1.453753 | 0.777867 |
| 20 | Belgium | 2016 | 1.443727 | 0.774551 |
| 21 | Belgium | 2017 | 1.418192 | 0.768017 |
| 22 | Belgium | 2018 | 1.412215 | 0.771966 |
| 23 | Belgium | 2019 | 1.395084 | 0.770581 |
| 24 | Belize  | 1990 | 1.00662  | 0.972825 |
| 25 | Belize  | 1991 | 0.965362 | 0.94683  |
| 26 | Belize  | 1992 | 0.931144 | 0.91186  |
| 27 | Belize  | 1993 | 0.932714 | 0.918929 |
| 28 | Belize  | 1994 | 0.931709 | 0.919944 |
| 29 | Belize  | 1995 | 0.88969  | 0.890978 |
| 30 |         |      |          |          |
| 31 |         |      |          |          |
| 32 |         |      |          |          |
| 33 |         |      |          |          |
| 34 |         |      |          |          |
| 35 |         |      |          |          |
| 36 |         |      |          |          |
| 37 |         |      |          |          |
| 38 |         |      |          |          |
| 39 |         |      |          |          |
| 40 |         |      |          |          |
| 41 |         |      |          |          |
| 42 |         |      |          |          |
| 43 |         |      |          |          |
| 44 |         |      |          |          |
| 45 |         |      |          |          |
| 46 |         |      |          |          |



1  
2  
3  
4  
5  
6  
7  
8  
9  
10  
11  
12  
13  
14  
15  
16  
17  
18  
19  
20  
21  
22  
23  
24  
25  
26  
27  
28  
29  
30  
31  
32  
33  
34  
35  
36  
37  
38  
39  
40  
41  
42  
43  
44  
45  
46

|        |      |          |          |
|--------|------|----------|----------|
| Belize | 1996 | 0.867909 | 0.868761 |
| Belize | 1997 | 0.814316 | 0.808436 |
| Belize | 1998 | 0.749212 | 0.736919 |
| Belize | 1999 | 0.714264 | 0.689447 |
| Belize | 2000 | 0.743064 | 0.711691 |
| Belize | 2001 | 0.79908  | 0.763506 |
| Belize | 2002 | 0.851249 | 0.81938  |
| Belize | 2003 | 0.884077 | 0.854598 |
| Belize | 2004 | 0.886352 | 0.861362 |
| Belize | 2005 | 0.904799 | 0.880318 |
| Belize | 2006 | 0.936253 | 0.920596 |
| Belize | 2007 | 0.939889 | 0.93118  |
| Belize | 2008 | 0.921785 | 0.919071 |
| Belize | 2009 | 0.920857 | 0.923895 |
| Belize | 2010 | 0.915009 | 0.919982 |
| Belize | 2011 | 0.925972 | 0.936544 |
| Belize | 2012 | 0.928028 | 0.938017 |
| Belize | 2013 | 0.940011 | 0.951449 |
| Belize | 2014 | 0.926192 | 0.934737 |
| Belize | 2015 | 0.870335 | 0.87185  |
| Belize | 2016 | 0.849205 | 0.852208 |
| Belize | 2017 | 0.845053 | 0.848611 |
| Belize | 2018 | 0.837958 | 0.836727 |
| Belize | 2019 | 0.830969 | 0.825455 |
| Benin  | 1990 | 0.79431  | 0.718407 |

|       |      |          |          |
|-------|------|----------|----------|
| Benin | 1991 | 0.787919 | 0.71165  |
| Benin | 1992 | 0.789963 | 0.712579 |
| Benin | 1993 | 0.792025 | 0.710205 |
| Benin | 1994 | 0.794905 | 0.70809  |
| Benin | 1995 | 0.79705  | 0.707537 |
| Benin | 1996 | 0.797238 | 0.702469 |
| Benin | 1997 | 0.79723  | 0.69874  |
| Benin | 1998 | 0.792817 | 0.690638 |
| Benin | 1999 | 0.787169 | 0.680281 |
| Benin | 2000 | 0.789476 | 0.67662  |
| Benin | 2001 | 0.791888 | 0.674468 |
| Benin | 2002 | 0.795861 | 0.672453 |
| Benin | 2003 | 0.805334 | 0.676195 |
| Benin | 2004 | 0.820154 | 0.684018 |
| Benin | 2005 | 0.837154 | 0.694794 |
| Benin | 2006 | 0.854647 | 0.70472  |
| Benin | 2007 | 0.870698 | 0.715176 |
| Benin | 2008 | 0.864989 | 0.708258 |
| Benin | 2009 | 0.861007 | 0.704984 |
| Benin | 2010 | 0.856749 | 0.700102 |
| Benin | 2011 | 0.848411 | 0.694153 |
| Benin | 2012 | 0.842619 | 0.6896   |
| Benin | 2013 | 0.831281 | 0.682766 |
| Benin | 2014 | 0.834141 | 0.686071 |
| Benin | 2015 | 0.836716 | 0.687831 |

|         |      |          |          |
|---------|------|----------|----------|
| Benin   | 2016 | 0.841937 | 0.693924 |
| Benin   | 2017 | 0.845774 | 0.698568 |
| Benin   | 2018 | 0.84839  | 0.702366 |
| Benin   | 2019 | 0.84808  | 0.705069 |
| Bermuda | 1990 | 0.754029 | 0.536264 |
| Bermuda | 1991 | 0.779454 | 0.553886 |
| Bermuda | 1992 | 0.840547 | 0.599338 |
| Bermuda | 1993 | 0.854096 | 0.607478 |
| Bermuda | 1994 | 0.872814 | 0.618957 |
| Bermuda | 1995 | 0.898129 | 0.634928 |
| Bermuda | 1996 | 0.888039 | 0.626096 |
| Bermuda | 1997 | 0.889982 | 0.625837 |
| Bermuda | 1998 | 0.898389 | 0.629455 |
| Bermuda | 1999 | 0.901327 | 0.628074 |
| Bermuda | 2000 | 0.917436 | 0.635426 |
| Bermuda | 2001 | 0.930333 | 0.644094 |
| Bermuda | 2002 | 0.916068 | 0.634163 |
| Bermuda | 2003 | 0.872629 | 0.604624 |
| Bermuda | 2004 | 0.847269 | 0.587719 |
| Bermuda | 2005 | 0.818464 | 0.567361 |
| Bermuda | 2006 | 0.787899 | 0.546584 |
| Bermuda | 2007 | 0.77141  | 0.533994 |
| Bermuda | 2008 | 0.766299 | 0.528829 |
| Bermuda | 2009 | 0.771124 | 0.5311   |
| Bermuda | 2010 | 0.759957 | 0.523274 |

|    |         |      |          |          |
|----|---------|------|----------|----------|
| 1  |         |      |          |          |
| 2  |         |      |          |          |
| 3  |         |      |          |          |
| 4  |         |      |          |          |
| 5  | Bermuda | 2011 | 0.75285  | 0.518281 |
| 6  | Bermuda | 2012 | 0.746253 | 0.51245  |
| 7  | Bermuda | 2013 | 0.749626 | 0.513518 |
| 8  | Bermuda | 2014 | 0.757856 | 0.518891 |
| 9  | Bermuda | 2015 | 0.769205 | 0.52558  |
| 10 | Bermuda | 2016 | 0.777422 | 0.531834 |
| 11 | Bermuda | 2017 | 0.777963 | 0.532703 |
| 12 | Bermuda | 2018 | 0.776396 | 0.531267 |
| 13 | Bermuda | 2019 | 0.774579 | 0.529411 |
| 14 | Bhutan  | 1990 | 1.150997 | 0.961563 |
| 15 | Bhutan  | 1991 | 1.159768 | 0.976396 |
| 16 | Bhutan  | 1992 | 1.161489 | 0.988481 |
| 17 | Bhutan  | 1993 | 1.162582 | 1.002648 |
| 18 | Bhutan  | 1994 | 1.16165  | 1.015731 |
| 19 | Bhutan  | 1995 | 1.161533 | 1.029975 |
| 20 | Bhutan  | 1996 | 1.155882 | 1.038013 |
| 21 | Bhutan  | 1997 | 1.14839  | 1.044638 |
| 22 | Bhutan  | 1998 | 1.132276 | 1.043871 |
| 23 | Bhutan  | 1999 | 1.117843 | 1.044833 |
| 24 | Bhutan  | 2000 | 1.104612 | 1.044609 |
| 25 | Bhutan  | 2001 | 1.082835 | 1.036621 |
| 26 | Bhutan  | 2002 | 1.060601 | 1.028499 |
| 27 | Bhutan  | 2003 | 1.048045 | 1.026816 |
| 28 | Bhutan  | 2004 | 1.048342 | 1.036155 |
| 29 | Bhutan  | 2005 | 1.045514 | 1.041306 |
| 30 |         |      |          |          |
| 31 |         |      |          |          |
| 32 |         |      |          |          |
| 33 |         |      |          |          |
| 34 |         |      |          |          |
| 35 |         |      |          |          |
| 36 |         |      |          |          |
| 37 |         |      |          |          |
| 38 |         |      |          |          |
| 39 |         |      |          |          |
| 40 |         |      |          |          |
| 41 |         |      |          |          |
| 42 |         |      |          |          |
| 43 |         |      |          |          |
| 44 |         |      |          |          |
| 45 |         |      |          |          |
| 46 |         |      |          |          |

1  
2  
3  
4  
5  
6  
7  
8  
9  
10  
11  
12  
13  
14  
15  
16  
17  
18  
19  
20  
21  
22  
23  
24  
25  
26  
27  
28  
29  
30  
31  
32  
33  
34  
35  
36  
37  
38  
39  
40  
41  
42  
43  
44  
45  
46

|                                  |      |          |          |
|----------------------------------|------|----------|----------|
| Bhutan                           | 2006 | 1.040212 | 1.045284 |
| Bhutan                           | 2007 | 1.04562  | 1.054329 |
| Bhutan                           | 2008 | 1.020866 | 1.035328 |
| Bhutan                           | 2009 | 0.990419 | 1.00997  |
| Bhutan                           | 2010 | 0.976659 | 0.999512 |
| Bhutan                           | 2011 | 0.963328 | 0.988538 |
| Bhutan                           | 2012 | 0.954794 | 0.981532 |
| Bhutan                           | 2013 | 0.951871 | 0.978607 |
| Bhutan                           | 2014 | 0.951886 | 0.977927 |
| Bhutan                           | 2015 | 0.944963 | 0.969948 |
| Bhutan                           | 2016 | 0.93875  | 0.962066 |
| Bhutan                           | 2017 | 0.941255 | 0.962716 |
| Bhutan                           | 2018 | 0.945337 | 0.964172 |
| Bhutan                           | 2019 | 0.95056  | 0.966948 |
| Bolivia (Plurinational State of) | 1990 | 0.961256 | 0.803475 |
| Bolivia (Plurinational State of) | 1991 | 0.974811 | 0.817495 |
| Bolivia (Plurinational State of) | 1992 | 1.002636 | 0.843273 |
| Bolivia (Plurinational State of) | 1993 | 1.017767 | 0.858119 |
| Bolivia (Plurinational State of) | 1994 | 1.033256 | 0.87403  |
| Bolivia (Plurinational State of) | 1995 | 1.024883 | 0.870068 |
| Bolivia (Plurinational State of) | 1996 | 1.017566 | 0.866427 |
| Bolivia (Plurinational State of) | 1997 | 1.007971 | 0.861273 |
| Bolivia (Plurinational State of) | 1998 | 0.984129 | 0.841985 |
| Bolivia (Plurinational State of) | 1999 | 0.966015 | 0.827632 |
| Bolivia (Plurinational State of) | 2000 | 0.962713 | 0.824518 |

|                                  |      |          |          |
|----------------------------------|------|----------|----------|
| Bolivia (Plurinational State of) | 2001 | 0.958932 | 0.820473 |
| Bolivia (Plurinational State of) | 2002 | 0.976256 | 0.835383 |
| Bolivia (Plurinational State of) | 2003 | 0.98302  | 0.842998 |
| Bolivia (Plurinational State of) | 2004 | 0.994413 | 0.853175 |
| Bolivia (Plurinational State of) | 2005 | 1.000176 | 0.857717 |
| Bolivia (Plurinational State of) | 2006 | 0.994393 | 0.853639 |
| Bolivia (Plurinational State of) | 2007 | 1.012508 | 0.870734 |
| Bolivia (Plurinational State of) | 2008 | 1.012945 | 0.872046 |
| Bolivia (Plurinational State of) | 2009 | 1.014013 | 0.874569 |
| Bolivia (Plurinational State of) | 2010 | 1.020693 | 0.882007 |
| Bolivia (Plurinational State of) | 2011 | 1.0303   | 0.892378 |
| Bolivia (Plurinational State of) | 2012 | 1.042369 | 0.905194 |
| Bolivia (Plurinational State of) | 2013 | 1.032939 | 0.899283 |
| Bolivia (Plurinational State of) | 2014 | 1.009051 | 0.880472 |
| Bolivia (Plurinational State of) | 2015 | 1.012061 | 0.885248 |
| Bolivia (Plurinational State of) | 2016 | 1.029472 | 0.902983 |
| Bolivia (Plurinational State of) | 2017 | 1.025379 | 0.901278 |
| Bolivia (Plurinational State of) | 2018 | 1.020638 | 0.898737 |
| Bolivia (Plurinational State of) | 2019 | 1.018462 | 0.897773 |
| Bosnia and Herzegovina           | 1990 | 1.29983  | 0.970983 |
| Bosnia and Herzegovina           | 1991 | 1.288569 | 0.978089 |
| Bosnia and Herzegovina           | 1992 | 1.355309 | 1.027289 |
| Bosnia and Herzegovina           | 1993 | 1.329285 | 0.98292  |
| Bosnia and Herzegovina           | 1994 | 1.34116  | 0.988002 |
| Bosnia and Herzegovina           | 1995 | 1.337425 | 0.976078 |

|                        |      |          |          |
|------------------------|------|----------|----------|
| Bosnia and Herzegovina | 1996 | 1.330841 | 0.969336 |
| Bosnia and Herzegovina | 1997 | 1.386711 | 1.048084 |
| Bosnia and Herzegovina | 1998 | 1.325447 | 0.989462 |
| Bosnia and Herzegovina | 1999 | 1.299408 | 0.931218 |
| Bosnia and Herzegovina | 2000 | 1.218634 | 0.856607 |
| Bosnia and Herzegovina | 2001 | 1.246342 | 0.884627 |
| Bosnia and Herzegovina | 2002 | 1.214282 | 0.851942 |
| Bosnia and Herzegovina | 2003 | 1.13905  | 0.783318 |
| Bosnia and Herzegovina | 2004 | 1.143951 | 0.790536 |
| Bosnia and Herzegovina | 2005 | 1.040577 | 0.726236 |
| Bosnia and Herzegovina | 2006 | 1.06114  | 0.738709 |
| Bosnia and Herzegovina | 2007 | 1.0373   | 0.726447 |
| Bosnia and Herzegovina | 2008 | 1.018065 | 0.713553 |
| Bosnia and Herzegovina | 2009 | 1.009822 | 0.716932 |
| Bosnia and Herzegovina | 2010 | 1.0141   | 0.719194 |
| Bosnia and Herzegovina | 2011 | 0.981583 | 0.69969  |
| Bosnia and Herzegovina | 2012 | 1.005197 | 0.710447 |
| Bosnia and Herzegovina | 2013 | 1.013019 | 0.708952 |
| Bosnia and Herzegovina | 2014 | 1.038881 | 0.725823 |
| Bosnia and Herzegovina | 2015 | 1.049397 | 0.736441 |
| Bosnia and Herzegovina | 2016 | 1.040546 | 0.735288 |
| Bosnia and Herzegovina | 2017 | 1.040503 | 0.737686 |
| Bosnia and Herzegovina | 2018 | 1.04249  | 0.738539 |
| Bosnia and Herzegovina | 2019 | 1.043485 | 0.74054  |
| Botswana               | 1990 | 0.537137 | 0.414065 |

|          |      |          |          |
|----------|------|----------|----------|
| Botswana | 1991 | 0.529932 | 0.411447 |
| Botswana | 1992 | 0.518595 | 0.406089 |
| Botswana | 1993 | 0.500924 | 0.397237 |
| Botswana | 1994 | 0.475532 | 0.382303 |
| Botswana | 1995 | 0.445387 | 0.362409 |
| Botswana | 1996 | 0.411066 | 0.337684 |
| Botswana | 1997 | 0.38692  | 0.317997 |
| Botswana | 1998 | 0.388996 | 0.316316 |
| Botswana | 1999 | 0.399472 | 0.320642 |
| Botswana | 2000 | 0.419352 | 0.331758 |
| Botswana | 2001 | 0.440807 | 0.343843 |
| Botswana | 2002 | 0.462907 | 0.35598  |
| Botswana | 2003 | 0.48127  | 0.365153 |
| Botswana | 2004 | 0.485173 | 0.364081 |
| Botswana | 2005 | 0.486513 | 0.361465 |
| Botswana | 2006 | 0.486971 | 0.359767 |
| Botswana | 2007 | 0.517909 | 0.376773 |
| Botswana | 2008 | 0.56281  | 0.404718 |
| Botswana | 2009 | 0.590041 | 0.421971 |
| Botswana | 2010 | 0.61666  | 0.43976  |
| Botswana | 2011 | 0.650044 | 0.462337 |
| Botswana | 2012 | 0.673408 | 0.478454 |
| Botswana | 2013 | 0.698869 | 0.496157 |
| Botswana | 2014 | 0.729034 | 0.517204 |
| Botswana | 2015 | 0.736907 | 0.525176 |



1  
2  
3  
4  
5  
6  
7  
8  
9  
10  
11  
12  
13  
14  
15  
16  
17  
18  
19  
20  
21  
22  
23  
24  
25  
26  
27  
28  
29  
30  
31  
32  
33  
34  
35  
36  
37  
38  
39  
40  
41  
42  
43  
44  
45  
46

|          |      |          |          |
|----------|------|----------|----------|
| Botswana | 2016 | 0.736744 | 0.527736 |
| Botswana | 2017 | 0.741796 | 0.534897 |
| Botswana | 2018 | 0.745507 | 0.541574 |
| Botswana | 2019 | 0.749048 | 0.547359 |
| Brazil   | 1990 | 0.868292 | 0.734531 |
| Brazil   | 1991 | 0.871669 | 0.733028 |
| Brazil   | 1992 | 0.873059 | 0.730412 |
| Brazil   | 1993 | 0.870166 | 0.724411 |
| Brazil   | 1994 | 0.872946 | 0.725148 |
| Brazil   | 1995 | 0.888112 | 0.736283 |
| Brazil   | 1996 | 0.901793 | 0.748348 |
| Brazil   | 1997 | 0.912694 | 0.754577 |
| Brazil   | 1998 | 0.915702 | 0.754223 |
| Brazil   | 1999 | 0.920762 | 0.755906 |
| Brazil   | 2000 | 0.923142 | 0.754715 |
| Brazil   | 2001 | 0.92368  | 0.75192  |
| Brazil   | 2002 | 0.926329 | 0.749707 |
| Brazil   | 2003 | 0.914675 | 0.736203 |
| Brazil   | 2004 | 0.908924 | 0.728108 |
| Brazil   | 2005 | 0.909099 | 0.725899 |
| Brazil   | 2006 | 0.914362 | 0.726873 |
| Brazil   | 2007 | 0.917005 | 0.725326 |
| Brazil   | 2008 | 0.919568 | 0.724005 |
| Brazil   | 2009 | 0.926131 | 0.725645 |
| Brazil   | 2010 | 0.929564 | 0.724421 |

|                   |      |          |          |
|-------------------|------|----------|----------|
| Brazil            | 2011 | 0.929337 | 0.72113  |
| Brazil            | 2012 | 0.932485 | 0.720529 |
| Brazil            | 2013 | 0.929513 | 0.715356 |
| Brazil            | 2014 | 0.928064 | 0.711744 |
| Brazil            | 2015 | 0.93     | 0.710368 |
| Brazil            | 2016 | 0.921374 | 0.701534 |
| Brazil            | 2017 | 0.923842 | 0.701841 |
| Brazil            | 2018 | 0.931119 | 0.708035 |
| Brazil            | 2019 | 0.926425 | 0.704651 |
| Brunei Darussalam | 1990 | 0.730035 | 0.53404  |
| Brunei Darussalam | 1991 | 0.74702  | 0.551392 |
| Brunei Darussalam | 1992 | 0.753832 | 0.561922 |
| Brunei Darussalam | 1993 | 0.761973 | 0.573017 |
| Brunei Darussalam | 1994 | 0.802694 | 0.622696 |
| Brunei Darussalam | 1995 | 0.817759 | 0.648665 |
| Brunei Darussalam | 1996 | 0.850126 | 0.700386 |
| Brunei Darussalam | 1997 | 0.894011 | 0.778129 |
| Brunei Darussalam | 1998 | 0.873648 | 0.765259 |
| Brunei Darussalam | 1999 | 0.871369 | 0.763791 |
| Brunei Darussalam | 2000 | 0.894188 | 0.798016 |
| Brunei Darussalam | 2001 | 0.90963  | 0.83227  |
| Brunei Darussalam | 2002 | 0.886411 | 0.780404 |
| Brunei Darussalam | 2003 | 0.854292 | 0.71243  |
| Brunei Darussalam | 2004 | 0.859174 | 0.715514 |
| Brunei Darussalam | 2005 | 0.84762  | 0.690099 |

|    |                   |      |          |          |
|----|-------------------|------|----------|----------|
| 1  |                   |      |          |          |
| 2  |                   |      |          |          |
| 3  |                   |      |          |          |
| 4  |                   |      |          |          |
| 5  | Brunei Darussalam | 2006 | 0.852917 | 0.685786 |
| 6  | Brunei Darussalam | 2007 | 0.882095 | 0.739274 |
| 7  | Brunei Darussalam | 2008 | 0.862392 | 0.697695 |
| 8  | Brunei Darussalam | 2009 | 0.856274 | 0.659067 |
| 9  | Brunei Darussalam | 2010 | 0.855225 | 0.645933 |
| 10 | Brunei Darussalam | 2011 | 0.874377 | 0.639123 |
| 11 | Brunei Darussalam | 2012 | 0.893294 | 0.618207 |
| 12 | Brunei Darussalam | 2013 | 0.887434 | 0.591531 |
| 13 | Brunei Darussalam | 2014 | 0.889551 | 0.570037 |
| 14 | Brunei Darussalam | 2015 | 0.908183 | 0.567185 |
| 15 | Brunei Darussalam | 2016 | 0.908363 | 0.560784 |
| 16 | Brunei Darussalam | 2017 | 0.899665 | 0.555    |
| 17 | Brunei Darussalam | 2018 | 0.897283 | 0.547615 |
| 18 | Brunei Darussalam | 2019 | 0.897071 | 0.549288 |
| 19 | Bulgaria          | 1990 | 0.784462 | 0.633343 |
| 20 | Bulgaria          | 1991 | 0.8026   | 0.650828 |
| 21 | Bulgaria          | 1992 | 0.791893 | 0.644128 |
| 22 | Bulgaria          | 1993 | 0.768757 | 0.619671 |
| 23 | Bulgaria          | 1994 | 0.766644 | 0.616116 |
| 24 | Bulgaria          | 1995 | 0.784155 | 0.626033 |
| 25 | Bulgaria          | 1996 | 0.792337 | 0.62834  |
| 26 | Bulgaria          | 1997 | 0.81624  | 0.64351  |
| 27 | Bulgaria          | 1998 | 0.810752 | 0.633696 |
| 28 | Bulgaria          | 1999 | 0.84948  | 0.659797 |
| 29 | Bulgaria          | 2000 | 0.827353 | 0.634195 |
| 30 |                   |      |          |          |
| 31 |                   |      |          |          |
| 32 |                   |      |          |          |
| 33 |                   |      |          |          |
| 34 |                   |      |          |          |
| 35 |                   |      |          |          |
| 36 |                   |      |          |          |
| 37 |                   |      |          |          |
| 38 |                   |      |          |          |
| 39 |                   |      |          |          |
| 40 |                   |      |          |          |
| 41 |                   |      |          |          |
| 42 |                   |      |          |          |
| 43 |                   |      |          |          |
| 44 |                   |      |          |          |
| 45 |                   |      |          |          |
| 46 |                   |      |          |          |

|              |      |          |          |
|--------------|------|----------|----------|
| Bulgaria     | 2001 | 0.799274 | 0.605875 |
| Bulgaria     | 2002 | 0.784054 | 0.590177 |
| Bulgaria     | 2003 | 0.761885 | 0.573417 |
| Bulgaria     | 2004 | 0.750577 | 0.563872 |
| Bulgaria     | 2005 | 0.737531 | 0.550685 |
| Bulgaria     | 2006 | 0.740673 | 0.551365 |
| Bulgaria     | 2007 | 0.742368 | 0.548454 |
| Bulgaria     | 2008 | 0.735157 | 0.539766 |
| Bulgaria     | 2009 | 0.733233 | 0.536161 |
| Bulgaria     | 2010 | 0.744196 | 0.543393 |
| Bulgaria     | 2011 | 0.738048 | 0.535808 |
| Bulgaria     | 2012 | 0.742174 | 0.534777 |
| Bulgaria     | 2013 | 0.748018 | 0.538745 |
| Bulgaria     | 2014 | 0.757692 | 0.54565  |
| Bulgaria     | 2015 | 0.768527 | 0.55158  |
| Bulgaria     | 2016 | 0.751909 | 0.541118 |
| Bulgaria     | 2017 | 0.748123 | 0.537571 |
| Bulgaria     | 2018 | 0.757731 | 0.540935 |
| Bulgaria     | 2019 | 0.759446 | 0.540909 |
| Burkina Faso | 1990 | 0.829528 | 0.714538 |
| Burkina Faso | 1991 | 0.822189 | 0.708491 |
| Burkina Faso | 1992 | 0.828201 | 0.71154  |
| Burkina Faso | 1993 | 0.826131 | 0.708344 |
| Burkina Faso | 1994 | 0.828671 | 0.709142 |
| Burkina Faso | 1995 | 0.832397 | 0.710774 |

|              |      |          |          |
|--------------|------|----------|----------|
| Burkina Faso | 1996 | 0.840602 | 0.718042 |
| Burkina Faso | 1997 | 0.855196 | 0.729615 |
| Burkina Faso | 1998 | 0.864386 | 0.736372 |
| Burkina Faso | 1999 | 0.878543 | 0.745592 |
| Burkina Faso | 2000 | 0.896482 | 0.757597 |
| Burkina Faso | 2001 | 0.900208 | 0.758025 |
| Burkina Faso | 2002 | 0.911224 | 0.761005 |
| Burkina Faso | 2003 | 0.922792 | 0.770118 |
| Burkina Faso | 2004 | 0.93218  | 0.777212 |
| Burkina Faso | 2005 | 0.936739 | 0.780345 |
| Burkina Faso | 2006 | 0.941423 | 0.78412  |
| Burkina Faso | 2007 | 0.937418 | 0.779712 |
| Burkina Faso | 2008 | 0.932447 | 0.771837 |
| Burkina Faso | 2009 | 0.932103 | 0.767737 |
| Burkina Faso | 2010 | 0.933339 | 0.766071 |
| Burkina Faso | 2011 | 0.936167 | 0.762728 |
| Burkina Faso | 2012 | 0.933527 | 0.758505 |
| Burkina Faso | 2013 | 0.934327 | 0.753482 |
| Burkina Faso | 2014 | 0.946187 | 0.758672 |
| Burkina Faso | 2015 | 0.965308 | 0.770071 |
| Burkina Faso | 2016 | 0.981429 | 0.778676 |
| Burkina Faso | 2017 | 0.997016 | 0.7884   |
| Burkina Faso | 2018 | 1.006615 | 0.794704 |
| Burkina Faso | 2019 | 1.016562 | 0.801219 |
| Burundi      | 1990 | 0.687664 | 0.563286 |

|         |      |          |          |
|---------|------|----------|----------|
| Burundi | 1991 | 0.694366 | 0.567374 |
| Burundi | 1992 | 0.699582 | 0.571893 |
| Burundi | 1993 | 0.698081 | 0.573959 |
| Burundi | 1994 | 0.696463 | 0.575131 |
| Burundi | 1995 | 0.698699 | 0.57815  |
| Burundi | 1996 | 0.712302 | 0.591291 |
| Burundi | 1997 | 0.719895 | 0.601894 |
| Burundi | 1998 | 0.728608 | 0.614085 |
| Burundi | 1999 | 0.737929 | 0.625256 |
| Burundi | 2000 | 0.734877 | 0.628305 |
| Burundi | 2001 | 0.734869 | 0.631386 |
| Burundi | 2002 | 0.733492 | 0.633296 |
| Burundi | 2003 | 0.733389 | 0.637925 |
| Burundi | 2004 | 0.729231 | 0.640778 |
| Burundi | 2005 | 0.718246 | 0.63823  |
| Burundi | 2006 | 0.703513 | 0.630502 |
| Burundi | 2007 | 0.683863 | 0.619678 |
| Burundi | 2008 | 0.666624 | 0.612776 |
| Burundi | 2009 | 0.663426 | 0.614655 |
| Burundi | 2010 | 0.660953 | 0.616004 |
| Burundi | 2011 | 0.656466 | 0.616586 |
| Burundi | 2012 | 0.654089 | 0.619867 |
| Burundi | 2013 | 0.652141 | 0.622567 |
| Burundi | 2014 | 0.6494   | 0.625271 |
| Burundi | 2015 | 0.644695 | 0.62811  |

1  
2  
3  
4  
5  
6  
7  
8  
9  
10  
11  
12  
13  
14  
15  
16  
17  
18  
19  
20  
21  
22  
23  
24  
25  
26  
27  
28  
29  
30  
31  
32  
33  
34  
35  
36  
37  
38  
39  
40  
41  
42  
43  
44  
45  
46

|            |      |          |          |
|------------|------|----------|----------|
| Burundi    | 2016 | 0.636883 | 0.629837 |
| Burundi    | 2017 | 0.631132 | 0.632785 |
| Burundi    | 2018 | 0.628577 | 0.636035 |
| Burundi    | 2019 | 0.624937 | 0.639786 |
| Cabo Verde | 1990 | 0.785566 | 0.5739   |
| Cabo Verde | 1991 | 0.799078 | 0.581168 |
| Cabo Verde | 1992 | 0.800885 | 0.580711 |
| Cabo Verde | 1993 | 0.780252 | 0.565062 |
| Cabo Verde | 1994 | 0.769012 | 0.55496  |
| Cabo Verde | 1995 | 0.760016 | 0.546382 |
| Cabo Verde | 1996 | 0.725456 | 0.51886  |
| Cabo Verde | 1997 | 0.676563 | 0.479908 |
| Cabo Verde | 1998 | 0.676536 | 0.473741 |
| Cabo Verde | 1999 | 0.676218 | 0.467118 |
| Cabo Verde | 2000 | 0.68503  | 0.466719 |
| Cabo Verde | 2001 | 0.686608 | 0.46229  |
| Cabo Verde | 2002 | 0.688755 | 0.458328 |
| Cabo Verde | 2003 | 0.690284 | 0.453906 |
| Cabo Verde | 2004 | 0.687477 | 0.446744 |
| Cabo Verde | 2005 | 0.684518 | 0.439673 |
| Cabo Verde | 2006 | 0.777244 | 0.500204 |
| Cabo Verde | 2007 | 0.816068 | 0.528048 |
| Cabo Verde | 2008 | 0.819805 | 0.532151 |
| Cabo Verde | 2009 | 0.824293 | 0.537742 |
| Cabo Verde | 2010 | 0.83081  | 0.546195 |

|    |            |      |          |          |
|----|------------|------|----------|----------|
| 1  |            |      |          |          |
| 2  |            |      |          |          |
| 3  |            |      |          |          |
| 4  |            |      |          |          |
| 5  | Cabo Verde | 2011 | 0.853879 | 0.565047 |
| 6  | Cabo Verde | 2012 | 0.875334 | 0.583896 |
| 7  | Cabo Verde | 2013 | 0.871868 | 0.58662  |
| 8  | Cabo Verde | 2014 | 0.904058 | 0.616563 |
| 9  | Cabo Verde | 2015 | 0.942277 | 0.652128 |
| 10 | Cabo Verde | 2016 | 1.004837 | 0.705484 |
| 11 | Cabo Verde | 2017 | 0.957232 | 0.681284 |
| 12 | Cabo Verde | 2018 | 0.696343 | 0.470762 |
| 13 | Cabo Verde | 2019 | 0.705846 | 0.473874 |
| 14 | Cambodia   | 1990 | 1.272435 | 0.929989 |
| 15 | Cambodia   | 1991 | 1.277283 | 0.931682 |
| 16 | Cambodia   | 1992 | 1.287046 | 0.936978 |
| 17 | Cambodia   | 1993 | 1.299802 | 0.944499 |
| 18 | Cambodia   | 1994 | 1.311296 | 0.951699 |
| 19 | Cambodia   | 1995 | 1.305299 | 0.947258 |
| 20 | Cambodia   | 1996 | 1.305278 | 0.945959 |
| 21 | Cambodia   | 1997 | 1.294164 | 0.937495 |
| 22 | Cambodia   | 1998 | 1.282978 | 0.929409 |
| 23 | Cambodia   | 1999 | 1.272036 | 0.922534 |
| 24 | Cambodia   | 2000 | 1.259729 | 0.913971 |
| 25 | Cambodia   | 2001 | 1.246865 | 0.905562 |
| 26 | Cambodia   | 2002 | 1.239166 | 0.900746 |
| 27 | Cambodia   | 2003 | 1.227679 | 0.89253  |
| 28 | Cambodia   | 2004 | 1.212898 | 0.88247  |
| 29 | Cambodia   | 2005 | 1.193716 | 0.869231 |
| 30 |            |      |          |          |
| 31 |            |      |          |          |
| 32 |            |      |          |          |
| 33 |            |      |          |          |
| 34 |            |      |          |          |
| 35 |            |      |          |          |
| 36 |            |      |          |          |
| 37 |            |      |          |          |
| 38 |            |      |          |          |
| 39 |            |      |          |          |
| 40 |            |      |          |          |
| 41 |            |      |          |          |
| 42 |            |      |          |          |
| 43 |            |      |          |          |
| 44 |            |      |          |          |
| 45 |            |      |          |          |
| 46 |            |      |          |          |



1  
2  
3  
4  
5  
6  
7  
8  
9  
10  
11  
12  
13  
14  
15  
16  
17  
18  
19  
20  
21  
22  
23  
24  
25  
26  
27  
28  
29  
30  
31  
32  
33  
34  
35  
36  
37  
38  
39  
40  
41  
42  
43  
44  
45  
46

|          |      |          |          |
|----------|------|----------|----------|
| Cambodia | 2006 | 1.18145  | 0.860138 |
| Cambodia | 2007 | 1.164389 | 0.848923 |
| Cambodia | 2008 | 1.148449 | 0.838274 |
| Cambodia | 2009 | 1.137969 | 0.830565 |
| Cambodia | 2010 | 1.134267 | 0.827896 |
| Cambodia | 2011 | 1.13422  | 0.827352 |
| Cambodia | 2012 | 1.135837 | 0.828119 |
| Cambodia | 2013 | 1.140934 | 0.831604 |
| Cambodia | 2014 | 1.14328  | 0.833467 |
| Cambodia | 2015 | 1.144017 | 0.833629 |
| Cambodia | 2016 | 1.146845 | 0.835286 |
| Cambodia | 2017 | 1.150349 | 0.836871 |
| Cambodia | 2018 | 1.152662 | 0.837604 |
| Cambodia | 2019 | 1.155105 | 0.838245 |
| Cameroon | 1990 | 1.147025 | 1.039542 |
| Cameroon | 1991 | 1.13009  | 1.023941 |
| Cameroon | 1992 | 1.11613  | 1.010117 |
| Cameroon | 1993 | 1.09613  | 0.991193 |
| Cameroon | 1994 | 1.085801 | 0.980193 |
| Cameroon | 1995 | 1.066587 | 0.962355 |
| Cameroon | 1996 | 1.04273  | 0.941254 |
| Cameroon | 1997 | 1.038881 | 0.934436 |
| Cameroon | 1998 | 1.030364 | 0.926553 |
| Cameroon | 1999 | 1.010618 | 0.908515 |
| Cameroon | 2000 | 0.99371  | 0.892449 |

|    |          |      |          |          |
|----|----------|------|----------|----------|
| 1  |          |      |          |          |
| 2  |          |      |          |          |
| 3  |          |      |          |          |
| 4  |          |      |          |          |
| 5  | Cameroon | 2001 | 0.973748 | 0.875349 |
| 6  | Cameroon | 2002 | 0.961464 | 0.860027 |
| 7  | Cameroon | 2003 | 0.950572 | 0.851844 |
| 8  | Cameroon | 2004 | 0.939277 | 0.843458 |
| 9  | Cameroon | 2005 | 0.925508 | 0.832964 |
| 10 | Cameroon | 2006 | 0.916299 | 0.824142 |
| 11 | Cameroon | 2007 | 0.904462 | 0.813191 |
| 12 | Cameroon | 2008 | 0.886022 | 0.796672 |
| 13 | Cameroon | 2009 | 0.876197 | 0.787422 |
| 14 | Cameroon | 2010 | 0.879262 | 0.788679 |
| 15 | Cameroon | 2011 | 0.880561 | 0.789209 |
| 16 | Cameroon | 2012 | 0.878504 | 0.786955 |
| 17 | Cameroon | 2013 | 0.876201 | 0.784414 |
| 18 | Cameroon | 2014 | 0.88642  | 0.793444 |
| 19 | Cameroon | 2015 | 0.894119 | 0.799428 |
| 20 | Cameroon | 2016 | 0.901086 | 0.806824 |
| 21 | Cameroon | 2017 | 0.904634 | 0.810746 |
| 22 | Cameroon | 2018 | 0.904815 | 0.812334 |
| 23 | Cameroon | 2019 | 0.906643 | 0.815062 |
| 24 | Canada   | 1990 | 1.071669 | 0.656583 |
| 25 | Canada   | 1991 | 1.068419 | 0.651509 |
| 26 | Canada   | 1992 | 1.072055 | 0.651547 |
| 27 | Canada   | 1993 | 1.062733 | 0.64336  |
| 28 | Canada   | 1994 | 1.071188 | 0.646973 |
| 29 | Canada   | 1995 | 1.056516 | 0.635922 |
| 30 |          |      |          |          |
| 31 |          |      |          |          |
| 32 |          |      |          |          |
| 33 |          |      |          |          |
| 34 |          |      |          |          |
| 35 |          |      |          |          |
| 36 |          |      |          |          |
| 37 |          |      |          |          |
| 38 |          |      |          |          |
| 39 |          |      |          |          |
| 40 |          |      |          |          |
| 41 |          |      |          |          |
| 42 |          |      |          |          |
| 43 |          |      |          |          |
| 44 |          |      |          |          |
| 45 |          |      |          |          |
| 46 |          |      |          |          |

|                          |      |          |          |
|--------------------------|------|----------|----------|
| Canada                   | 1996 | 1.06505  | 0.637783 |
| Canada                   | 1997 | 1.053599 | 0.628887 |
| Canada                   | 1998 | 1.053543 | 0.626099 |
| Canada                   | 1999 | 1.048713 | 0.618933 |
| Canada                   | 2000 | 1.075001 | 0.633436 |
| Canada                   | 2001 | 1.081442 | 0.635703 |
| Canada                   | 2002 | 1.090276 | 0.639234 |
| Canada                   | 2003 | 1.086281 | 0.636843 |
| Canada                   | 2004 | 1.090858 | 0.638593 |
| Canada                   | 2005 | 1.111257 | 0.652645 |
| Canada                   | 2006 | 1.138485 | 0.671429 |
| Canada                   | 2007 | 1.147179 | 0.680731 |
| Canada                   | 2008 | 1.155455 | 0.690482 |
| Canada                   | 2009 | 1.15475  | 0.694508 |
| Canada                   | 2010 | 1.166421 | 0.707449 |
| Canada                   | 2011 | 1.162524 | 0.712348 |
| Canada                   | 2012 | 1.14527  | 0.710073 |
| Canada                   | 2013 | 1.132927 | 0.710844 |
| Canada                   | 2014 | 1.127098 | 0.715051 |
| Canada                   | 2015 | 1.11813  | 0.716868 |
| Canada                   | 2016 | 1.106954 | 0.71676  |
| Canada                   | 2017 | 1.094248 | 0.715128 |
| Canada                   | 2018 | 1.074678 | 0.709354 |
| Canada                   | 2019 | 1.062453 | 0.707807 |
| Central African Republic | 1990 | 0.605335 | 0.494503 |

|                          |      |          |          |
|--------------------------|------|----------|----------|
| Central African Republic | 1991 | 0.595076 | 0.488287 |
| Central African Republic | 1992 | 0.579631 | 0.476163 |
| Central African Republic | 1993 | 0.593358 | 0.485861 |
| Central African Republic | 1994 | 0.597356 | 0.488188 |
| Central African Republic | 1995 | 0.60126  | 0.490392 |
| Central African Republic | 1996 | 0.606962 | 0.494629 |
| Central African Republic | 1997 | 0.606767 | 0.493809 |
| Central African Republic | 1998 | 0.60576  | 0.491861 |
| Central African Republic | 1999 | 0.601875 | 0.487075 |
| Central African Republic | 2000 | 0.599029 | 0.482639 |
| Central African Republic | 2001 | 0.598767 | 0.482322 |
| Central African Republic | 2002 | 0.601461 | 0.484166 |
| Central African Republic | 2003 | 0.60518  | 0.487199 |
| Central African Republic | 2004 | 0.605982 | 0.487695 |
| Central African Republic | 2005 | 0.60574  | 0.486763 |
| Central African Republic | 2006 | 0.606321 | 0.485265 |
| Central African Republic | 2007 | 0.605549 | 0.483734 |
| Central African Republic | 2008 | 0.602208 | 0.479866 |
| Central African Republic | 2009 | 0.602173 | 0.479239 |
| Central African Republic | 2010 | 0.600321 | 0.478502 |
| Central African Republic | 2011 | 0.601359 | 0.479995 |
| Central African Republic | 2012 | 0.604953 | 0.483166 |
| Central African Republic | 2013 | 0.609224 | 0.485905 |
| Central African Republic | 2014 | 0.609242 | 0.485843 |
| Central African Republic | 2015 | 0.606339 | 0.484164 |

1  
2  
3  
4  
5  
6  
7  
8  
9  
10  
11  
12  
13  
14  
15  
16  
17  
18  
19  
20  
21  
22  
23  
24  
25  
26  
27  
28  
29  
30  
31  
32  
33  
34  
35  
36  
37  
38  
39  
40  
41  
42  
43  
44  
45  
46

|                          |      |          |          |
|--------------------------|------|----------|----------|
| Central African Republic | 2016 | 0.601069 | 0.48213  |
| Central African Republic | 2017 | 0.596947 | 0.480092 |
| Central African Republic | 2018 | 0.594318 | 0.478991 |
| Central African Republic | 2019 | 0.592694 | 0.479463 |
| Chad                     | 1990 | 0.834872 | 0.761775 |
| Chad                     | 1991 | 0.821838 | 0.752272 |
| Chad                     | 1992 | 0.80896  | 0.744471 |
| Chad                     | 1993 | 0.792107 | 0.732762 |
| Chad                     | 1994 | 0.769123 | 0.714465 |
| Chad                     | 1995 | 0.753542 | 0.702173 |
| Chad                     | 1996 | 0.731651 | 0.68299  |
| Chad                     | 1997 | 0.713377 | 0.666729 |
| Chad                     | 1998 | 0.700701 | 0.655117 |
| Chad                     | 1999 | 0.682246 | 0.638162 |
| Chad                     | 2000 | 0.669872 | 0.626096 |
| Chad                     | 2001 | 0.662084 | 0.61966  |
| Chad                     | 2002 | 0.65693  | 0.616713 |
| Chad                     | 2003 | 0.654422 | 0.618421 |
| Chad                     | 2004 | 0.644129 | 0.613396 |
| Chad                     | 2005 | 0.63571  | 0.610532 |
| Chad                     | 2006 | 0.628836 | 0.607959 |
| Chad                     | 2007 | 0.622864 | 0.607788 |
| Chad                     | 2008 | 0.614477 | 0.605515 |
| Chad                     | 2009 | 0.603446 | 0.603535 |
| Chad                     | 2010 | 0.597793 | 0.602175 |

|       |      |          |          |
|-------|------|----------|----------|
| Chad  | 2011 | 0.591857 | 0.601036 |
| Chad  | 2012 | 0.586086 | 0.600795 |
| Chad  | 2013 | 0.582037 | 0.600969 |
| Chad  | 2014 | 0.578729 | 0.604162 |
| Chad  | 2015 | 0.577133 | 0.606962 |
| Chad  | 2016 | 0.577592 | 0.611944 |
| Chad  | 2017 | 0.579311 | 0.618026 |
| Chad  | 2018 | 0.579088 | 0.621805 |
| Chad  | 2019 | 0.578632 | 0.626191 |
| Chile | 1990 | 0.975267 | 0.789928 |
| Chile | 1991 | 1.004222 | 0.810795 |
| Chile | 1992 | 1.03789  | 0.832208 |
| Chile | 1993 | 1.027902 | 0.817282 |
| Chile | 1994 | 1.024455 | 0.811473 |
| Chile | 1995 | 1.007339 | 0.788872 |
| Chile | 1996 | 0.980229 | 0.755604 |
| Chile | 1997 | 0.99706  | 0.765156 |
| Chile | 1998 | 1.032587 | 0.788071 |
| Chile | 1999 | 1.05249  | 0.799165 |
| Chile | 2000 | 1.06127  | 0.804204 |
| Chile | 2001 | 1.073648 | 0.813752 |
| Chile | 2002 | 1.076179 | 0.809961 |
| Chile | 2003 | 1.080699 | 0.808243 |
| Chile | 2004 | 1.09034  | 0.810053 |
| Chile | 2005 | 1.098112 | 0.812524 |

|       |      |          |          |
|-------|------|----------|----------|
| Chile | 2006 | 1.101727 | 0.813429 |
| Chile | 2007 | 1.099118 | 0.810954 |
| Chile | 2008 | 1.101981 | 0.816507 |
| Chile | 2009 | 1.087498 | 0.804882 |
| Chile | 2010 | 1.090558 | 0.803135 |
| Chile | 2011 | 1.106878 | 0.813052 |
| Chile | 2012 | 1.114865 | 0.818805 |
| Chile | 2013 | 1.110409 | 0.816162 |
| Chile | 2014 | 1.0971   | 0.804446 |
| Chile | 2015 | 1.100775 | 0.805611 |
| Chile | 2016 | 1.103035 | 0.806088 |
| Chile | 2017 | 1.114846 | 0.814555 |
| Chile | 2018 | 1.11631  | 0.815553 |
| Chile | 2019 | 1.114836 | 0.814624 |
| China | 1990 | 0.967823 | 0.814115 |
| China | 1991 | 0.958559 | 0.806344 |
| China | 1992 | 0.957942 | 0.80596  |
| China | 1993 | 0.964164 | 0.811179 |
| China | 1994 | 0.973764 | 0.813081 |
| China | 1995 | 0.959877 | 0.800819 |
| China | 1996 | 0.957836 | 0.79771  |
| China | 1997 | 0.962476 | 0.799933 |
| China | 1998 | 0.959408 | 0.790422 |
| China | 1999 | 0.962405 | 0.793427 |
| China | 2000 | 0.96278  | 0.800564 |

|          |      |          |          |
|----------|------|----------|----------|
| China    | 2001 | 0.950333 | 0.789064 |
| China    | 2002 | 0.932042 | 0.776288 |
| China    | 2003 | 0.921262 | 0.772159 |
| China    | 2004 | 0.906997 | 0.757937 |
| China    | 2005 | 0.88725  | 0.735528 |
| China    | 2006 | 0.897301 | 0.739151 |
| China    | 2007 | 0.892122 | 0.729779 |
| China    | 2008 | 0.88588  | 0.720897 |
| China    | 2009 | 0.880109 | 0.711189 |
| China    | 2010 | 0.877856 | 0.705003 |
| China    | 2011 | 0.877119 | 0.697836 |
| China    | 2012 | 0.854498 | 0.672527 |
| China    | 2013 | 0.849703 | 0.664253 |
| China    | 2014 | 0.845928 | 0.661064 |
| China    | 2015 | 0.836498 | 0.650847 |
| China    | 2016 | 0.840203 | 0.651806 |
| China    | 2017 | 0.858599 | 0.666526 |
| China    | 2018 | 0.878564 | 0.683378 |
| China    | 2019 | 0.887628 | 0.688388 |
| Colombia | 1990 | 0.92605  | 0.87332  |
| Colombia | 1991 | 0.88317  | 0.835151 |
| Colombia | 1992 | 0.881827 | 0.827676 |
| Colombia | 1993 | 0.897087 | 0.835138 |
| Colombia | 1994 | 0.897415 | 0.830507 |
| Colombia | 1995 | 0.883693 | 0.818259 |



|          |      |          |          |
|----------|------|----------|----------|
| Colombia | 1996 | 0.860237 | 0.790636 |
| Colombia | 1997 | 0.876126 | 0.798379 |
| Colombia | 1998 | 0.887859 | 0.799727 |
| Colombia | 1999 | 0.863474 | 0.772837 |
| Colombia | 2000 | 0.849005 | 0.755909 |
| Colombia | 2001 | 0.850541 | 0.749405 |
| Colombia | 2002 | 0.737513 | 0.644557 |
| Colombia | 2003 | 0.823671 | 0.713566 |
| Colombia | 2004 | 0.815959 | 0.70425  |
| Colombia | 2005 | 0.846694 | 0.725794 |
| Colombia | 2006 | 0.823752 | 0.702385 |
| Colombia | 2007 | 0.834971 | 0.708499 |
| Colombia | 2008 | 0.821626 | 0.69362  |
| Colombia | 2009 | 0.771829 | 0.648857 |
| Colombia | 2010 | 0.78163  | 0.652348 |
| Colombia | 2011 | 0.791119 | 0.65474  |
| Colombia | 2012 | 0.786915 | 0.647334 |
| Colombia | 2013 | 0.795163 | 0.650472 |
| Colombia | 2014 | 0.847073 | 0.690264 |
| Colombia | 2015 | 0.832346 | 0.676081 |
| Colombia | 2016 | 0.829521 | 0.671116 |
| Colombia | 2017 | 0.828961 | 0.667807 |
| Colombia | 2018 | 0.843668 | 0.676432 |
| Colombia | 2019 | 0.843713 | 0.675001 |
| Comoros  | 1990 | 0.733786 | 0.662082 |

|         |      |          |          |
|---------|------|----------|----------|
| Comoros | 1991 | 0.7402   | 0.663758 |
| Comoros | 1992 | 0.745905 | 0.664646 |
| Comoros | 1993 | 0.757544 | 0.670189 |
| Comoros | 1994 | 0.766249 | 0.672645 |
| Comoros | 1995 | 0.775972 | 0.676143 |
| Comoros | 1996 | 0.789989 | 0.682161 |
| Comoros | 1997 | 0.802756 | 0.68778  |
| Comoros | 1998 | 0.828547 | 0.704046 |
| Comoros | 1999 | 0.860904 | 0.725442 |
| Comoros | 2000 | 0.88092  | 0.738351 |
| Comoros | 2001 | 0.907113 | 0.756097 |
| Comoros | 2002 | 0.917167 | 0.761638 |
| Comoros | 2003 | 0.939988 | 0.777236 |
| Comoros | 2004 | 0.947701 | 0.781221 |
| Comoros | 2005 | 0.953186 | 0.787593 |
| Comoros | 2006 | 0.96207  | 0.788326 |
| Comoros | 2007 | 0.950667 | 0.783126 |
| Comoros | 2008 | 0.954273 | 0.785029 |
| Comoros | 2009 | 0.965166 | 0.788867 |
| Comoros | 2010 | 0.983476 | 0.796443 |
| Comoros | 2011 | 0.986429 | 0.798943 |
| Comoros | 2012 | 0.993435 | 0.803484 |
| Comoros | 2013 | 0.994148 | 0.805074 |
| Comoros | 2014 | 0.99033  | 0.809445 |
| Comoros | 2015 | 0.995551 | 0.813129 |

1  
2  
3  
4  
5  
6  
7  
8  
9  
10  
11  
12  
13  
14  
15  
16  
17  
18  
19  
20  
21  
22  
23  
24  
25  
26  
27  
28  
29  
30  
31  
32  
33  
34  
35  
36  
37  
38  
39  
40  
41  
42  
43  
44  
45  
46

|         |      |          |          |
|---------|------|----------|----------|
| Comoros | 2016 | 1.000726 | 0.815787 |
| Comoros | 2017 | 1.006585 | 0.819901 |
| Comoros | 2018 | 1.010868 | 0.821308 |
| Comoros | 2019 | 1.012969 | 0.822834 |
| Congo   | 1990 | 0.751571 | 0.620385 |
| Congo   | 1991 | 0.757008 | 0.620743 |
| Congo   | 1992 | 0.751454 | 0.61207  |
| Congo   | 1993 | 0.767738 | 0.621074 |
| Congo   | 1994 | 0.793581 | 0.640092 |
| Congo   | 1995 | 0.807649 | 0.649302 |
| Congo   | 1996 | 0.843536 | 0.675503 |
| Congo   | 1997 | 0.849181 | 0.678751 |
| Congo   | 1998 | 0.861181 | 0.681345 |
| Congo   | 1999 | 0.873966 | 0.688289 |
| Congo   | 2000 | 0.887117 | 0.693063 |
| Congo   | 2001 | 0.894852 | 0.695199 |
| Congo   | 2002 | 0.91501  | 0.707194 |
| Congo   | 2003 | 0.938097 | 0.727745 |
| Congo   | 2004 | 0.965721 | 0.749928 |
| Congo   | 2005 | 0.999334 | 0.777948 |
| Congo   | 2006 | 1.01017  | 0.790931 |
| Congo   | 2007 | 1.01219  | 0.799437 |
| Congo   | 2008 | 1.011191 | 0.805224 |
| Congo   | 2009 | 1.001536 | 0.805305 |
| Congo   | 2010 | 1.005744 | 0.814986 |

|              |      |          |          |
|--------------|------|----------|----------|
| Congo        | 2011 | 0.995978 | 0.812365 |
| Congo        | 2012 | 0.976587 | 0.809515 |
| Congo        | 2013 | 0.96994  | 0.812844 |
| Congo        | 2014 | 0.962707 | 0.814701 |
| Congo        | 2015 | 0.950028 | 0.810594 |
| Congo        | 2016 | 0.936194 | 0.807464 |
| Congo        | 2017 | 0.929756 | 0.808413 |
| Congo        | 2018 | 0.918173 | 0.804938 |
| Congo        | 2019 | 0.907093 | 0.801955 |
| Cook Islands | 1990 | 0.731273 | 0.737078 |
| Cook Islands | 1991 | 0.714071 | 0.722799 |
| Cook Islands | 1992 | 0.703288 | 0.713012 |
| Cook Islands | 1993 | 0.694466 | 0.703081 |
| Cook Islands | 1994 | 0.691835 | 0.697671 |
| Cook Islands | 1995 | 0.690798 | 0.693392 |
| Cook Islands | 1996 | 0.692286 | 0.692624 |
| Cook Islands | 1997 | 0.691053 | 0.690664 |
| Cook Islands | 1998 | 0.687318 | 0.687769 |
| Cook Islands | 1999 | 0.678993 | 0.681139 |
| Cook Islands | 2000 | 0.670422 | 0.674048 |
| Cook Islands | 2001 | 0.676639 | 0.680259 |
| Cook Islands | 2002 | 0.677434 | 0.678221 |
| Cook Islands | 2003 | 0.672888 | 0.667111 |
| Cook Islands | 2004 | 0.672924 | 0.657395 |
| Cook Islands | 2005 | 0.660459 | 0.636278 |

1  
2  
3  
4  
5  
6  
7  
8  
9  
10  
11  
12  
13  
14  
15  
16  
17  
18  
19  
20  
21  
22  
23  
24  
25  
26  
27  
28  
29  
30  
31  
32  
33  
34  
35  
36  
37  
38  
39  
40  
41  
42  
43  
44  
45  
46

|              |      |          |          |
|--------------|------|----------|----------|
| Cook Islands | 2006 | 0.662874 | 0.630598 |
| Cook Islands | 2007 | 0.655072 | 0.618395 |
| Cook Islands | 2008 | 0.655387 | 0.615491 |
| Cook Islands | 2009 | 0.660637 | 0.619082 |
| Cook Islands | 2010 | 0.662691 | 0.621673 |
| Cook Islands | 2011 | 0.64694  | 0.607209 |
| Cook Islands | 2012 | 0.643794 | 0.603641 |
| Cook Islands | 2013 | 0.648095 | 0.605316 |
| Cook Islands | 2014 | 0.648776 | 0.602425 |
| Cook Islands | 2015 | 0.646748 | 0.597015 |
| Cook Islands | 2016 | 0.64459  | 0.590916 |
| Cook Islands | 2017 | 0.657328 | 0.598123 |
| Cook Islands | 2018 | 0.665537 | 0.601679 |
| Cook Islands | 2019 | 0.673095 | 0.605095 |
| Costa Rica   | 1990 | 0.842686 | 0.780245 |
| Costa Rica   | 1991 | 0.846408 | 0.779555 |
| Costa Rica   | 1992 | 0.801387 | 0.735808 |
| Costa Rica   | 1993 | 0.822401 | 0.751924 |
| Costa Rica   | 1994 | 0.818493 | 0.744542 |
| Costa Rica   | 1995 | 0.809652 | 0.735454 |
| Costa Rica   | 1996 | 0.823017 | 0.742523 |
| Costa Rica   | 1997 | 0.81881  | 0.739022 |
| Costa Rica   | 1998 | 0.833152 | 0.75157  |
| Costa Rica   | 1999 | 0.772513 | 0.695838 |
| Costa Rica   | 2000 | 0.772973 | 0.691908 |

|            |      |          |          |
|------------|------|----------|----------|
| Costa Rica | 2001 | 0.792404 | 0.706965 |
| Costa Rica | 2002 | 0.785335 | 0.698226 |
| Costa Rica | 2003 | 0.789385 | 0.699126 |
| Costa Rica | 2004 | 0.775158 | 0.685789 |
| Costa Rica | 2005 | 0.823794 | 0.726354 |
| Costa Rica | 2006 | 0.794886 | 0.69863  |
| Costa Rica | 2007 | 0.804319 | 0.704393 |
| Costa Rica | 2008 | 0.802687 | 0.700785 |
| Costa Rica | 2009 | 0.824271 | 0.715522 |
| Costa Rica | 2010 | 0.752826 | 0.65028  |
| Costa Rica | 2011 | 0.779381 | 0.666415 |
| Costa Rica | 2012 | 0.797407 | 0.675406 |
| Costa Rica | 2013 | 0.796876 | 0.669869 |
| Costa Rica | 2014 | 0.79033  | 0.658754 |
| Costa Rica | 2015 | 0.788694 | 0.653029 |
| Costa Rica | 2016 | 0.795657 | 0.658021 |
| Costa Rica | 2017 | 0.805902 | 0.664662 |
| Costa Rica | 2018 | 0.785138 | 0.644119 |
| Costa Rica | 2019 | 0.794065 | 0.647561 |
| Croatia    | 1990 | 1.120185 | 0.65127  |
| Croatia    | 1991 | 1.125968 | 0.653247 |
| Croatia    | 1992 | 1.121772 | 0.655144 |
| Croatia    | 1993 | 1.111291 | 0.645602 |
| Croatia    | 1994 | 1.121473 | 0.65099  |
| Croatia    | 1995 | 1.139708 | 0.659749 |

|         |      |          |          |
|---------|------|----------|----------|
| Croatia | 1996 | 1.161451 | 0.665951 |
| Croatia | 1997 | 1.152629 | 0.651192 |
| Croatia | 1998 | 1.166428 | 0.64639  |
| Croatia | 1999 | 1.196099 | 0.654948 |
| Croatia | 2000 | 1.216367 | 0.660369 |
| Croatia | 2001 | 1.220003 | 0.655333 |
| Croatia | 2002 | 1.248965 | 0.670539 |
| Croatia | 2003 | 1.232678 | 0.662375 |
| Croatia | 2004 | 1.28712  | 0.691856 |
| Croatia | 2005 | 1.241395 | 0.66823  |
| Croatia | 2006 | 1.256257 | 0.676099 |
| Croatia | 2007 | 1.282833 | 0.69208  |
| Croatia | 2008 | 1.256338 | 0.68161  |
| Croatia | 2009 | 1.257667 | 0.683845 |
| Croatia | 2010 | 1.318366 | 0.725261 |
| Croatia | 2011 | 1.290008 | 0.714134 |
| Croatia | 2012 | 1.250825 | 0.693977 |
| Croatia | 2013 | 1.318069 | 0.727072 |
| Croatia | 2014 | 1.304176 | 0.721959 |
| Croatia | 2015 | 1.322415 | 0.740471 |
| Croatia | 2016 | 1.287002 | 0.722383 |
| Croatia | 2017 | 1.265466 | 0.716749 |
| Croatia | 2018 | 1.256311 | 0.71655  |
| Croatia | 2019 | 1.242454 | 0.714384 |
| Cuba    | 1990 | 0.727847 | 0.702803 |

|      |      |          |          |
|------|------|----------|----------|
| Cuba | 1991 | 0.724469 | 0.694605 |
| Cuba | 1992 | 0.729795 | 0.694633 |
| Cuba | 1993 | 0.720995 | 0.682637 |
| Cuba | 1994 | 0.70017  | 0.659501 |
| Cuba | 1995 | 0.738602 | 0.691371 |
| Cuba | 1996 | 0.766014 | 0.714588 |
| Cuba | 1997 | 0.765753 | 0.712793 |
| Cuba | 1998 | 0.800248 | 0.743681 |
| Cuba | 1999 | 0.812952 | 0.753939 |
| Cuba | 2000 | 0.881295 | 0.814171 |
| Cuba | 2001 | 0.959164 | 0.883325 |
| Cuba | 2002 | 0.988012 | 0.90707  |
| Cuba | 2003 | 1.02399  | 0.936121 |
| Cuba | 2004 | 1.061575 | 0.965081 |
| Cuba | 2005 | 1.074199 | 0.973171 |
| Cuba | 2006 | 1.080161 | 0.975409 |
| Cuba | 2007 | 1.094049 | 0.985931 |
| Cuba | 2008 | 1.115955 | 1.001873 |
| Cuba | 2009 | 1.088237 | 0.972591 |
| Cuba | 2010 | 1.080138 | 0.961158 |
| Cuba | 2011 | 1.104658 | 0.980563 |
| Cuba | 2012 | 1.059809 | 0.939556 |
| Cuba | 2013 | 1.057449 | 0.934553 |
| Cuba | 2014 | 1.045602 | 0.920903 |
| Cuba | 2015 | 1.024565 | 0.900839 |



|    |        |      |          |          |
|----|--------|------|----------|----------|
| 1  |        |      |          |          |
| 2  |        |      |          |          |
| 3  |        |      |          |          |
| 4  |        |      |          |          |
| 5  | Cuba   | 2016 | 0.999353 | 0.875106 |
| 6  | Cuba   | 2017 | 0.976223 | 0.851947 |
| 7  | Cuba   | 2018 | 0.979438 | 0.850798 |
| 8  | Cuba   | 2019 | 0.984318 | 0.851479 |
| 9  | Cyprus | 1990 | 0.973492 | 0.995284 |
| 10 | Cyprus | 1991 | 0.870799 | 0.852337 |
| 11 | Cyprus | 1992 | 0.836617 | 0.776383 |
| 12 | Cyprus | 1993 | 0.865602 | 0.768364 |
| 13 | Cyprus | 1994 | 0.894084 | 0.769336 |
| 14 | Cyprus | 1995 | 0.884558 | 0.755664 |
| 15 | Cyprus | 1996 | 0.850063 | 0.727604 |
| 16 | Cyprus | 1997 | 0.836166 | 0.718292 |
| 17 | Cyprus | 1998 | 0.862069 | 0.738631 |
| 18 | Cyprus | 1999 | 0.890677 | 0.7614   |
| 19 | Cyprus | 2000 | 0.839486 | 0.709185 |
| 20 | Cyprus | 2001 | 0.828953 | 0.682359 |
| 21 | Cyprus | 2002 | 0.831988 | 0.672456 |
| 22 | Cyprus | 2003 | 0.888021 | 0.684125 |
| 23 | Cyprus | 2004 | 0.889668 | 0.677149 |
| 24 | Cyprus | 2005 | 0.883011 | 0.659401 |
| 25 | Cyprus | 2006 | 0.876697 | 0.632202 |
| 26 | Cyprus | 2007 | 0.867611 | 0.61137  |
| 27 | Cyprus | 2008 | 0.874585 | 0.601709 |
| 28 | Cyprus | 2009 | 0.842293 | 0.542734 |
| 29 | Cyprus | 2010 | 0.842268 | 0.527126 |
| 30 |        |      |          |          |
| 31 |        |      |          |          |
| 32 |        |      |          |          |
| 33 |        |      |          |          |
| 34 |        |      |          |          |
| 35 |        |      |          |          |
| 36 |        |      |          |          |
| 37 |        |      |          |          |
| 38 |        |      |          |          |
| 39 |        |      |          |          |
| 40 |        |      |          |          |
| 41 |        |      |          |          |
| 42 |        |      |          |          |
| 43 |        |      |          |          |
| 44 |        |      |          |          |
| 45 |        |      |          |          |
| 46 |        |      |          |          |

|         |      |          |          |
|---------|------|----------|----------|
| Cyprus  | 2011 | 0.902202 | 0.551805 |
| Cyprus  | 2012 | 0.932618 | 0.566257 |
| Cyprus  | 2013 | 0.954078 | 0.588914 |
| Cyprus  | 2014 | 0.981005 | 0.618201 |
| Cyprus  | 2015 | 0.972019 | 0.633882 |
| Cyprus  | 2016 | 0.994398 | 0.701614 |
| Cyprus  | 2017 | 1.049295 | 0.817407 |
| Cyprus  | 2018 | 1.005187 | 0.80001  |
| Cyprus  | 2019 | 0.963696 | 0.782896 |
| Czechia | 1990 | 1.016176 | 0.624468 |
| Czechia | 1991 | 1.092255 | 0.665403 |
| Czechia | 1992 | 1.114824 | 0.676432 |
| Czechia | 1993 | 1.165005 | 0.705793 |
| Czechia | 1994 | 1.161923 | 0.705491 |
| Czechia | 1995 | 1.221828 | 0.746068 |
| Czechia | 1996 | 1.210004 | 0.738504 |
| Czechia | 1997 | 1.2386   | 0.75613  |
| Czechia | 1998 | 1.243416 | 0.755395 |
| Czechia | 1999 | 1.216241 | 0.737046 |
| Czechia | 2000 | 1.251442 | 0.756081 |
| Czechia | 2001 | 1.23813  | 0.748034 |
| Czechia | 2002 | 1.232174 | 0.737573 |
| Czechia | 2003 | 1.2408   | 0.740963 |
| Czechia | 2004 | 1.219882 | 0.723872 |
| Czechia | 2005 | 1.260818 | 0.743677 |

|    |                 |      |          |          |
|----|-----------------|------|----------|----------|
| 1  |                 |      |          |          |
| 2  |                 |      |          |          |
| 3  |                 |      |          |          |
| 4  |                 |      |          |          |
| 5  | Czechia         | 2006 | 1.263043 | 0.740681 |
| 6  | Czechia         | 2007 | 1.254411 | 0.738889 |
| 7  | Czechia         | 2008 | 1.2398   | 0.735183 |
| 8  | Czechia         | 2009 | 1.218698 | 0.726824 |
| 9  | Czechia         | 2010 | 1.206849 | 0.719868 |
| 10 | Czechia         | 2011 | 1.208496 | 0.722033 |
| 11 | Czechia         | 2012 | 1.210538 | 0.724006 |
| 12 | Czechia         | 2013 | 1.220183 | 0.728389 |
| 13 | Czechia         | 2014 | 1.220982 | 0.727287 |
| 14 | Czechia         | 2015 | 1.22085  | 0.726128 |
| 15 | Czechia         | 2016 | 1.216345 | 0.725895 |
| 16 | Czechia         | 2017 | 1.174381 | 0.703135 |
| 17 | Czechia         | 2018 | 1.163977 | 0.704178 |
| 18 | Czechia         | 2019 | 1.15844  | 0.708733 |
| 19 | C ɹ te d'Ivoire | 1990 | 0.608796 | 0.660555 |
| 20 | C ɹ te d'Ivoire | 1991 | 0.595623 | 0.644126 |
| 21 | C ɹ te d'Ivoire | 1992 | 0.578152 | 0.627977 |
| 22 | C ɹ te d'Ivoire | 1993 | 0.56919  | 0.618807 |
| 23 | C ɹ te d'Ivoire | 1994 | 0.557509 | 0.606066 |
| 24 | C ɹ te d'Ivoire | 1995 | 0.549824 | 0.596539 |
| 25 | C ɹ te d'Ivoire | 1996 | 0.548132 | 0.592989 |
| 26 | C ɹ te d'Ivoire | 1997 | 0.552384 | 0.594317 |
| 27 | C ɹ te d'Ivoire | 1998 | 0.559997 | 0.597753 |
| 28 | C ɹ te d'Ivoire | 1999 | 0.564649 | 0.599111 |
| 29 | C ɹ te d'Ivoire | 2000 | 0.571707 | 0.601928 |
| 30 |                 |      |          |          |
| 31 |                 |      |          |          |
| 32 |                 |      |          |          |
| 33 |                 |      |          |          |
| 34 |                 |      |          |          |
| 35 |                 |      |          |          |
| 36 |                 |      |          |          |
| 37 |                 |      |          |          |
| 38 |                 |      |          |          |
| 39 |                 |      |          |          |
| 40 |                 |      |          |          |
| 41 |                 |      |          |          |
| 42 |                 |      |          |          |
| 43 |                 |      |          |          |
| 44 |                 |      |          |          |
| 45 |                 |      |          |          |
| 46 |                 |      |          |          |

|                                       |      |          |          |
|---------------------------------------|------|----------|----------|
| C 么 te d'Ivoire                       | 2001 | 0.585033 | 0.608489 |
| C 么 te d'Ivoire                       | 2002 | 0.595451 | 0.615232 |
| C 么 te d'Ivoire                       | 2003 | 0.602649 | 0.618669 |
| C 么 te d'Ivoire                       | 2004 | 0.604192 | 0.619534 |
| C 么 te d'Ivoire                       | 2005 | 0.613897 | 0.625708 |
| C 么 te d'Ivoire                       | 2006 | 0.622914 | 0.631968 |
| C 么 te d'Ivoire                       | 2007 | 0.625933 | 0.632453 |
| C 么 te d'Ivoire                       | 2008 | 0.630376 | 0.635391 |
| C 么 te d'Ivoire                       | 2009 | 0.632111 | 0.63704  |
| C 么 te d'Ivoire                       | 2010 | 0.629477 | 0.635272 |
| C 么 te d'Ivoire                       | 2011 | 0.627319 | 0.633461 |
| C 么 te d'Ivoire                       | 2012 | 0.625624 | 0.632268 |
| C 么 te d'Ivoire                       | 2013 | 0.623281 | 0.631079 |
| C 么 te d'Ivoire                       | 2014 | 0.62667  | 0.635978 |
| C 么 te d'Ivoire                       | 2015 | 0.631361 | 0.641248 |
| C 么 te d'Ivoire                       | 2016 | 0.635046 | 0.64627  |
| C 么 te d'Ivoire                       | 2017 | 0.637611 | 0.650224 |
| C 么 te d'Ivoire                       | 2018 | 0.641324 | 0.658071 |
| C 么 te d'Ivoire                       | 2019 | 0.643183 | 0.663257 |
| Democratic People's Republic of Korea | 1990 | 1.519679 | 0.93015  |
| Democratic People's Republic of Korea | 1991 | 1.517594 | 0.928075 |
| Democratic People's Republic of Korea | 1992 | 1.515332 | 0.925618 |
| Democratic People's Republic of Korea | 1993 | 1.511403 | 0.922131 |
| Democratic People's Republic of Korea | 1994 | 1.508383 | 0.918629 |
| Democratic People's Republic of Korea | 1995 | 1.50472  | 0.916326 |

|    |                                       |      |          |          |
|----|---------------------------------------|------|----------|----------|
| 1  |                                       |      |          |          |
| 2  |                                       |      |          |          |
| 3  |                                       |      |          |          |
| 4  |                                       |      |          |          |
| 5  | Democratic People's Republic of Korea | 1996 | 1.499132 | 0.914125 |
| 6  | Democratic People's Republic of Korea | 1997 | 1.48746  | 0.907333 |
| 7  | Democratic People's Republic of Korea | 1998 | 1.47484  | 0.898221 |
| 8  | Democratic People's Republic of Korea | 1999 | 1.465112 | 0.889807 |
| 9  | Democratic People's Republic of Korea | 2000 | 1.457588 | 0.883    |
| 10 | Democratic People's Republic of Korea | 2001 | 1.449234 | 0.87407  |
| 11 | Democratic People's Republic of Korea | 2002 | 1.439481 | 0.863734 |
| 12 | Democratic People's Republic of Korea | 2003 | 1.428879 | 0.857005 |
| 13 | Democratic People's Republic of Korea | 2004 | 1.420628 | 0.85164  |
| 14 | Democratic People's Republic of Korea | 2005 | 1.413032 | 0.846354 |
| 15 | Democratic People's Republic of Korea | 2006 | 1.408239 | 0.843679 |
| 16 | Democratic People's Republic of Korea | 2007 | 1.404697 | 0.842011 |
| 17 | Democratic People's Republic of Korea | 2008 | 1.404365 | 0.842973 |
| 18 | Democratic People's Republic of Korea | 2009 | 1.405944 | 0.8431   |
| 19 | Democratic People's Republic of Korea | 2010 | 1.404803 | 0.841923 |
| 20 | Democratic People's Republic of Korea | 2011 | 1.398525 | 0.838881 |
| 21 | Democratic People's Republic of Korea | 2012 | 1.386802 | 0.833673 |
| 22 | Democratic People's Republic of Korea | 2013 | 1.371735 | 0.82762  |
| 23 | Democratic People's Republic of Korea | 2014 | 1.353179 | 0.81921  |
| 24 | Democratic People's Republic of Korea | 2015 | 1.335352 | 0.811898 |
| 25 | Democratic People's Republic of Korea | 2016 | 1.318845 | 0.806027 |
| 26 | Democratic People's Republic of Korea | 2017 | 1.307835 | 0.803468 |
| 27 | Democratic People's Republic of Korea | 2018 | 1.299564 | 0.802576 |
| 28 | Democratic People's Republic of Korea | 2019 | 1.295109 | 0.802939 |
| 29 | Democratic Republic of the Congo      | 1990 | 0.725667 | 0.623441 |
| 30 |                                       |      |          |          |
| 31 |                                       |      |          |          |
| 32 |                                       |      |          |          |
| 33 |                                       |      |          |          |
| 34 |                                       |      |          |          |
| 35 |                                       |      |          |          |
| 36 |                                       |      |          |          |
| 37 |                                       |      |          |          |
| 38 |                                       |      |          |          |
| 39 |                                       |      |          |          |
| 40 |                                       |      |          |          |
| 41 |                                       |      |          |          |
| 42 |                                       |      |          |          |
| 43 |                                       |      |          |          |
| 44 |                                       |      |          |          |
| 45 |                                       |      |          |          |
| 46 |                                       |      |          |          |

|                                  |      |          |          |
|----------------------------------|------|----------|----------|
| Democratic Republic of the Congo | 1991 | 0.740756 | 0.629281 |
| Democratic Republic of the Congo | 1992 | 0.75213  | 0.632608 |
| Democratic Republic of the Congo | 1993 | 0.766523 | 0.637728 |
| Democratic Republic of the Congo | 1994 | 0.77596  | 0.638698 |
| Democratic Republic of the Congo | 1995 | 0.783725 | 0.63836  |
| Democratic Republic of the Congo | 1996 | 0.809876 | 0.651945 |
| Democratic Republic of the Congo | 1997 | 0.808153 | 0.642786 |
| Democratic Republic of the Congo | 1998 | 0.825377 | 0.648066 |
| Democratic Republic of the Congo | 1999 | 0.839514 | 0.651081 |
| Democratic Republic of the Congo | 2000 | 0.857808 | 0.657211 |
| Democratic Republic of the Congo | 2001 | 0.880893 | 0.668343 |
| Democratic Republic of the Congo | 2002 | 0.900827 | 0.677205 |
| Democratic Republic of the Congo | 2003 | 0.915041 | 0.684614 |
| Democratic Republic of the Congo | 2004 | 0.928388 | 0.689952 |
| Democratic Republic of the Congo | 2005 | 0.935923 | 0.692857 |
| Democratic Republic of the Congo | 2006 | 0.938317 | 0.693584 |
| Democratic Republic of the Congo | 2007 | 0.934732 | 0.69219  |
| Democratic Republic of the Congo | 2008 | 0.927033 | 0.689089 |
| Democratic Republic of the Congo | 2009 | 0.92225  | 0.687671 |
| Democratic Republic of the Congo | 2010 | 0.913491 | 0.68321  |
| Democratic Republic of the Congo | 2011 | 0.903043 | 0.679241 |
| Democratic Republic of the Congo | 2012 | 0.896883 | 0.678318 |
| Democratic Republic of the Congo | 2013 | 0.889759 | 0.677695 |
| Democratic Republic of the Congo | 2014 | 0.884106 | 0.678253 |
| Democratic Republic of the Congo | 2015 | 0.885333 | 0.681047 |

|    |                                  |      |          |          |
|----|----------------------------------|------|----------|----------|
| 1  |                                  |      |          |          |
| 2  |                                  |      |          |          |
| 3  |                                  |      |          |          |
| 4  |                                  |      |          |          |
| 5  | Democratic Republic of the Congo | 2016 | 0.883509 | 0.685571 |
| 6  | Democratic Republic of the Congo | 2017 | 0.883648 | 0.690975 |
| 7  | Democratic Republic of the Congo | 2018 | 0.878558 | 0.693063 |
| 8  | Democratic Republic of the Congo | 2019 | 0.876196 | 0.69748  |
| 9  |                                  |      |          |          |
| 10 | Denmark                          | 1990 | 0.914828 | 0.580452 |
| 11 | Denmark                          | 1991 | 0.912012 | 0.572928 |
| 12 | Denmark                          | 1992 | 0.890685 | 0.554798 |
| 13 | Denmark                          | 1993 | 0.87468  | 0.544928 |
| 14 | Denmark                          | 1994 | 0.831742 | 0.522527 |
| 15 | Denmark                          | 1995 | 0.824691 | 0.520423 |
| 16 | Denmark                          | 1996 | 0.81649  | 0.514111 |
| 17 | Denmark                          | 1997 | 0.821561 | 0.517473 |
| 18 | Denmark                          | 1998 | 0.800373 | 0.502251 |
| 19 | Denmark                          | 1999 | 0.798478 | 0.504149 |
| 20 | Denmark                          | 2000 | 0.814684 | 0.504074 |
| 21 | Denmark                          | 2001 | 0.824117 | 0.502832 |
| 22 | Denmark                          | 2002 | 0.839073 | 0.506498 |
| 23 | Denmark                          | 2003 | 0.834985 | 0.501439 |
| 24 | Denmark                          | 2004 | 0.840014 | 0.504647 |
| 25 | Denmark                          | 2005 | 0.859294 | 0.51366  |
| 26 | Denmark                          | 2006 | 0.872854 | 0.519461 |
| 27 | Denmark                          | 2007 | 0.897032 | 0.531496 |
| 28 | Denmark                          | 2008 | 0.907035 | 0.535438 |
| 29 | Denmark                          | 2009 | 0.901804 | 0.534455 |
| 30 | Denmark                          | 2010 | 0.913237 | 0.543388 |
| 31 |                                  |      |          |          |
| 32 |                                  |      |          |          |
| 33 |                                  |      |          |          |
| 34 |                                  |      |          |          |
| 35 |                                  |      |          |          |
| 36 |                                  |      |          |          |
| 37 |                                  |      |          |          |
| 38 |                                  |      |          |          |
| 39 |                                  |      |          |          |
| 40 |                                  |      |          |          |
| 41 |                                  |      |          |          |
| 42 |                                  |      |          |          |
| 43 |                                  |      |          |          |
| 44 |                                  |      |          |          |
| 45 |                                  |      |          |          |
| 46 |                                  |      |          |          |

|          |      |          |          |
|----------|------|----------|----------|
| Denmark  | 2011 | 0.930847 | 0.55667  |
| Denmark  | 2012 | 0.925529 | 0.557666 |
| Denmark  | 2013 | 0.909819 | 0.55261  |
| Denmark  | 2014 | 0.911329 | 0.558367 |
| Denmark  | 2015 | 0.920682 | 0.572028 |
| Denmark  | 2016 | 0.891396 | 0.563705 |
| Denmark  | 2017 | 0.87517  | 0.562369 |
| Denmark  | 2018 | 0.856567 | 0.559299 |
| Denmark  | 2019 | 0.83897  | 0.555753 |
| Djibouti | 1990 | 0.63711  | 0.62949  |
| Djibouti | 1991 | 0.640369 | 0.623249 |
| Djibouti | 1992 | 0.633152 | 0.617298 |
| Djibouti | 1993 | 0.612619 | 0.606712 |
| Djibouti | 1994 | 0.606436 | 0.600977 |
| Djibouti | 1995 | 0.597126 | 0.597611 |
| Djibouti | 1996 | 0.591292 | 0.597983 |
| Djibouti | 1997 | 0.591939 | 0.603648 |
| Djibouti | 1998 | 0.589677 | 0.60793  |
| Djibouti | 1999 | 0.591275 | 0.614159 |
| Djibouti | 2000 | 0.589404 | 0.615726 |
| Djibouti | 2001 | 0.588645 | 0.619655 |
| Djibouti | 2002 | 0.588821 | 0.624743 |
| Djibouti | 2003 | 0.59524  | 0.632076 |
| Djibouti | 2004 | 0.600295 | 0.640742 |
| Djibouti | 2005 | 0.604165 | 0.646974 |



|          |      |          |          |
|----------|------|----------|----------|
| Djibouti | 2006 | 0.607081 | 0.651123 |
| Djibouti | 2007 | 0.59813  | 0.646241 |
| Djibouti | 2008 | 0.592115 | 0.644566 |
| Djibouti | 2009 | 0.593195 | 0.649664 |
| Djibouti | 2010 | 0.596027 | 0.655453 |
| Djibouti | 2011 | 0.597782 | 0.661758 |
| Djibouti | 2012 | 0.601631 | 0.66921  |
| Djibouti | 2013 | 0.607341 | 0.678561 |
| Djibouti | 2014 | 0.609306 | 0.685456 |
| Djibouti | 2015 | 0.613572 | 0.691928 |
| Djibouti | 2016 | 0.616979 | 0.699061 |
| Djibouti | 2017 | 0.620938 | 0.707408 |
| Djibouti | 2018 | 0.622501 | 0.713307 |
| Djibouti | 2019 | 0.623897 | 0.718761 |
| Dominica | 1990 | 1.022575 | 0.68341  |
| Dominica | 1991 | 1.030748 | 0.681536 |
| Dominica | 1992 | 0.966633 | 0.635319 |
| Dominica | 1993 | 0.955614 | 0.621836 |
| Dominica | 1994 | 0.967154 | 0.623203 |
| Dominica | 1995 | 0.971693 | 0.621751 |
| Dominica | 1996 | 0.982772 | 0.625897 |
| Dominica | 1997 | 0.995791 | 0.633172 |
| Dominica | 1998 | 1.014203 | 0.645226 |
| Dominica | 1999 | 1.07042  | 0.681689 |
| Dominica | 2000 | 1.106362 | 0.706969 |

|                    |      |          |          |
|--------------------|------|----------|----------|
| Dominica           | 2001 | 1.133138 | 0.731554 |
| Dominica           | 2002 | 1.144745 | 0.752951 |
| Dominica           | 2003 | 1.130896 | 0.76167  |
| Dominica           | 2004 | 1.100279 | 0.756289 |
| Dominica           | 2005 | 1.098023 | 0.757618 |
| Dominica           | 2006 | 1.097205 | 0.766254 |
| Dominica           | 2007 | 1.086021 | 0.768361 |
| Dominica           | 2008 | 1.059714 | 0.765443 |
| Dominica           | 2009 | 1.039281 | 0.764358 |
| Dominica           | 2010 | 1.017251 | 0.762748 |
| Dominica           | 2011 | 1.00979  | 0.773488 |
| Dominica           | 2012 | 0.988291 | 0.776944 |
| Dominica           | 2013 | 0.972341 | 0.779038 |
| Dominica           | 2014 | 0.951066 | 0.776249 |
| Dominica           | 2015 | 0.929208 | 0.769479 |
| Dominica           | 2016 | 0.924913 | 0.775782 |
| Dominica           | 2017 | 0.916874 | 0.778058 |
| Dominica           | 2018 | 0.909062 | 0.779735 |
| Dominica           | 2019 | 0.902622 | 0.781262 |
| Dominican Republic | 1990 | 0.792257 | 0.775078 |
| Dominican Republic | 1991 | 0.813805 | 0.79193  |
| Dominican Republic | 1992 | 0.834425 | 0.808714 |
| Dominican Republic | 1993 | 0.867692 | 0.836164 |
| Dominican Republic | 1994 | 0.831727 | 0.799803 |
| Dominican Republic | 1995 | 0.788926 | 0.756014 |

|                    |      |          |          |
|--------------------|------|----------|----------|
| Dominican Republic | 1996 | 0.750525 | 0.710374 |
| Dominican Republic | 1997 | 0.727226 | 0.680711 |
| Dominican Republic | 1998 | 0.704717 | 0.653237 |
| Dominican Republic | 1999 | 0.655838 | 0.600255 |
| Dominican Republic | 2000 | 0.667709 | 0.608755 |
| Dominican Republic | 2001 | 0.683421 | 0.621056 |
| Dominican Republic | 2002 | 0.672707 | 0.608319 |
| Dominican Republic | 2003 | 0.688722 | 0.619241 |
| Dominican Republic | 2004 | 0.716078 | 0.641397 |
| Dominican Republic | 2005 | 0.748373 | 0.669059 |
| Dominican Republic | 2006 | 0.755305 | 0.675231 |
| Dominican Republic | 2007 | 0.762239 | 0.680346 |
| Dominican Republic | 2008 | 0.776457 | 0.691661 |
| Dominican Republic | 2009 | 0.795809 | 0.710386 |
| Dominican Republic | 2010 | 0.808009 | 0.727011 |
| Dominican Republic | 2011 | 0.795596 | 0.723439 |
| Dominican Republic | 2012 | 0.780869 | 0.71514  |
| Dominican Republic | 2013 | 0.77778  | 0.715245 |
| Dominican Republic | 2014 | 0.790124 | 0.729196 |
| Dominican Republic | 2015 | 0.802808 | 0.741573 |
| Dominican Republic | 2016 | 0.815963 | 0.755204 |
| Dominican Republic | 2017 | 0.835907 | 0.773302 |
| Dominican Republic | 2018 | 0.852982 | 0.787151 |
| Dominican Republic | 2019 | 0.867118 | 0.7988   |
| Ecuador            | 1990 | 1.004058 | 1.011805 |

|         |      |          |          |
|---------|------|----------|----------|
| Ecuador | 1991 | 0.968923 | 0.969688 |
| Ecuador | 1992 | 1.003831 | 0.998713 |
| Ecuador | 1993 | 0.991662 | 0.981519 |
| Ecuador | 1994 | 0.975175 | 0.96323  |
| Ecuador | 1995 | 0.969265 | 0.958788 |
| Ecuador | 1996 | 0.955254 | 0.945169 |
| Ecuador | 1997 | 0.963522 | 0.948701 |
| Ecuador | 1998 | 0.952234 | 0.929045 |
| Ecuador | 1999 | 0.923097 | 0.898357 |
| Ecuador | 2000 | 0.945688 | 0.918728 |
| Ecuador | 2001 | 0.850152 | 0.82902  |
| Ecuador | 2002 | 0.961827 | 0.929527 |
| Ecuador | 2003 | 1.002522 | 0.961998 |
| Ecuador | 2004 | 0.951695 | 0.910259 |
| Ecuador | 2005 | 0.933601 | 0.891627 |
| Ecuador | 2006 | 0.935124 | 0.891747 |
| Ecuador | 2007 | 0.923045 | 0.875347 |
| Ecuador | 2008 | 0.908829 | 0.848903 |
| Ecuador | 2009 | 0.909745 | 0.838831 |
| Ecuador | 2010 | 0.905887 | 0.830621 |
| Ecuador | 2011 | 0.872038 | 0.795452 |
| Ecuador | 2012 | 0.948539 | 0.857824 |
| Ecuador | 2013 | 0.954923 | 0.857567 |
| Ecuador | 2014 | 0.945461 | 0.846159 |
| Ecuador | 2015 | 0.933084 | 0.834753 |

1  
2  
3  
4  
5  
6  
7  
8  
9  
10  
11  
12  
13  
14  
15  
16  
17  
18  
19  
20  
21  
22  
23  
24  
25  
26  
27  
28  
29  
30  
31  
32  
33  
34  
35  
36  
37  
38  
39  
40  
41  
42  
43  
44  
45  
46

|         |      |          |          |
|---------|------|----------|----------|
| Ecuador | 2016 | 0.940996 | 0.838891 |
| Ecuador | 2017 | 0.946693 | 0.839503 |
| Ecuador | 2018 | 0.958062 | 0.848115 |
| Ecuador | 2019 | 0.982864 | 0.871573 |
| Egypt   | 1990 | 1.352837 | 1.300901 |
| Egypt   | 1991 | 1.345168 | 1.317427 |
| Egypt   | 1992 | 1.356801 | 1.35033  |
| Egypt   | 1993 | 1.359543 | 1.369332 |
| Egypt   | 1994 | 1.336761 | 1.356111 |
| Egypt   | 1995 | 1.314426 | 1.347094 |
| Egypt   | 1996 | 1.356722 | 1.410277 |
| Egypt   | 1997 | 1.367379 | 1.441698 |
| Egypt   | 1998 | 1.367158 | 1.459711 |
| Egypt   | 1999 | 1.357297 | 1.482505 |
| Egypt   | 2000 | 1.355486 | 1.547564 |
| Egypt   | 2001 | 1.340398 | 1.572534 |
| Egypt   | 2002 | 1.300644 | 1.537725 |
| Egypt   | 2003 | 1.241502 | 1.444409 |
| Egypt   | 2004 | 1.231767 | 1.42514  |
| Egypt   | 2005 | 1.259757 | 1.48129  |
| Egypt   | 2006 | 1.273849 | 1.56127  |
| Egypt   | 2007 | 1.241724 | 1.559132 |
| Egypt   | 2008 | 1.2281   | 1.558302 |
| Egypt   | 2009 | 1.221783 | 1.566194 |
| Egypt   | 2010 | 1.223014 | 1.588974 |

|             |      |          |          |
|-------------|------|----------|----------|
| Egypt       | 2011 | 1.166152 | 1.543971 |
| Egypt       | 2012 | 1.181251 | 1.56277  |
| Egypt       | 2013 | 1.128811 | 1.5249   |
| Egypt       | 2014 | 1.142337 | 1.587852 |
| Egypt       | 2015 | 1.165619 | 1.642986 |
| Egypt       | 2016 | 1.160821 | 1.652987 |
| Egypt       | 2017 | 1.148174 | 1.63138  |
| Egypt       | 2018 | 1.137364 | 1.622527 |
| Egypt       | 2019 | 1.124721 | 1.598394 |
| El Salvador | 1990 | 0.73088  | 0.628185 |
| El Salvador | 1991 | 0.70667  | 0.605372 |
| El Salvador | 1992 | 0.706118 | 0.602843 |
| El Salvador | 1993 | 0.690439 | 0.588379 |
| El Salvador | 1994 | 0.691847 | 0.586128 |
| El Salvador | 1995 | 0.625846 | 0.525309 |
| El Salvador | 1996 | 0.678738 | 0.566622 |
| El Salvador | 1997 | 0.642916 | 0.534002 |
| El Salvador | 1998 | 0.567219 | 0.466982 |
| El Salvador | 1999 | 0.592851 | 0.484268 |
| El Salvador | 2000 | 0.547509 | 0.443736 |
| El Salvador | 2001 | 0.570958 | 0.459772 |
| El Salvador | 2002 | 0.57284  | 0.458034 |
| El Salvador | 2003 | 0.540174 | 0.428803 |
| El Salvador | 2004 | 0.519341 | 0.408988 |
| El Salvador | 2005 | 0.506918 | 0.396288 |

1  
2  
3  
4  
5  
6  
7  
8  
9  
10  
11  
12  
13  
14  
15  
16  
17  
18  
19  
20  
21  
22  
23  
24  
25  
26  
27  
28  
29  
30  
31  
32  
33  
34  
35  
36  
37  
38  
39  
40  
41  
42  
43  
44  
45  
46

|                   |      |          |          |
|-------------------|------|----------|----------|
| El Salvador       | 2006 | 0.491691 | 0.381601 |
| El Salvador       | 2007 | 0.506517 | 0.390121 |
| El Salvador       | 2008 | 0.5161   | 0.394159 |
| El Salvador       | 2009 | 0.523686 | 0.396446 |
| El Salvador       | 2010 | 0.551921 | 0.415391 |
| El Salvador       | 2011 | 0.554047 | 0.414798 |
| El Salvador       | 2012 | 0.581725 | 0.432742 |
| El Salvador       | 2013 | 0.60464  | 0.447815 |
| El Salvador       | 2014 | 0.563794 | 0.416177 |
| El Salvador       | 2015 | 0.565509 | 0.415662 |
| El Salvador       | 2016 | 0.560112 | 0.409023 |
| El Salvador       | 2017 | 0.573525 | 0.415772 |
| El Salvador       | 2018 | 0.589898 | 0.425152 |
| El Salvador       | 2019 | 0.588189 | 0.420935 |
| Equatorial Guinea | 1990 | 0.633973 | 0.475046 |
| Equatorial Guinea | 1991 | 0.643732 | 0.476437 |
| Equatorial Guinea | 1992 | 0.648953 | 0.474689 |
| Equatorial Guinea | 1993 | 0.667183 | 0.482076 |
| Equatorial Guinea | 1994 | 0.685891 | 0.489868 |
| Equatorial Guinea | 1995 | 0.695666 | 0.493196 |
| Equatorial Guinea | 1996 | 0.719499 | 0.505742 |
| Equatorial Guinea | 1997 | 0.726417 | 0.506651 |
| Equatorial Guinea | 1998 | 0.743037 | 0.514358 |
| Equatorial Guinea | 1999 | 0.75764  | 0.522421 |
| Equatorial Guinea | 2000 | 0.771162 | 0.530608 |

|                   |      |          |          |
|-------------------|------|----------|----------|
| Equatorial Guinea | 2001 | 0.78625  | 0.541806 |
| Equatorial Guinea | 2002 | 0.813222 | 0.560839 |
| Equatorial Guinea | 2003 | 0.844645 | 0.586309 |
| Equatorial Guinea | 2004 | 0.864957 | 0.605754 |
| Equatorial Guinea | 2005 | 0.883082 | 0.624017 |
| Equatorial Guinea | 2006 | 0.89857  | 0.641249 |
| Equatorial Guinea | 2007 | 0.903298 | 0.651933 |
| Equatorial Guinea | 2008 | 0.921692 | 0.668859 |
| Equatorial Guinea | 2009 | 0.937131 | 0.689382 |
| Equatorial Guinea | 2010 | 0.954428 | 0.707902 |
| Equatorial Guinea | 2011 | 0.94896  | 0.713287 |
| Equatorial Guinea | 2012 | 0.934341 | 0.710454 |
| Equatorial Guinea | 2013 | 0.911668 | 0.701174 |
| Equatorial Guinea | 2014 | 0.904311 | 0.702942 |
| Equatorial Guinea | 2015 | 0.913769 | 0.712517 |
| Equatorial Guinea | 2016 | 0.908977 | 0.71704  |
| Equatorial Guinea | 2017 | 0.899726 | 0.715847 |
| Equatorial Guinea | 2018 | 0.895166 | 0.716091 |
| Equatorial Guinea | 2019 | 0.892762 | 0.716859 |
| Eritrea           | 1990 | 0.677516 | 0.486014 |
| Eritrea           | 1991 | 0.66837  | 0.481683 |
| Eritrea           | 1992 | 0.653672 | 0.476384 |
| Eritrea           | 1993 | 0.635299 | 0.468895 |
| Eritrea           | 1994 | 0.617765 | 0.463212 |
| Eritrea           | 1995 | 0.585629 | 0.44997  |



|         |      |          |          |
|---------|------|----------|----------|
| Eritrea | 1996 | 0.592799 | 0.455702 |
| Eritrea | 1997 | 0.604464 | 0.46541  |
| Eritrea | 1998 | 0.622404 | 0.477271 |
| Eritrea | 1999 | 0.635233 | 0.488692 |
| Eritrea | 2000 | 0.652666 | 0.502612 |
| Eritrea | 2001 | 0.672426 | 0.51557  |
| Eritrea | 2002 | 0.682087 | 0.528655 |
| Eritrea | 2003 | 0.696141 | 0.540144 |
| Eritrea | 2004 | 0.706811 | 0.548242 |
| Eritrea | 2005 | 0.717387 | 0.555826 |
| Eritrea | 2006 | 0.721666 | 0.559545 |
| Eritrea | 2007 | 0.726562 | 0.563659 |
| Eritrea | 2008 | 0.729562 | 0.567179 |
| Eritrea | 2009 | 0.733471 | 0.571313 |
| Eritrea | 2010 | 0.736993 | 0.57369  |
| Eritrea | 2011 | 0.747012 | 0.581633 |
| Eritrea | 2012 | 0.75857  | 0.592977 |
| Eritrea | 2013 | 0.770296 | 0.603493 |
| Eritrea | 2014 | 0.780923 | 0.612417 |
| Eritrea | 2015 | 0.787631 | 0.620088 |
| Eritrea | 2016 | 0.794511 | 0.628143 |
| Eritrea | 2017 | 0.800615 | 0.636744 |
| Eritrea | 2018 | 0.801815 | 0.641395 |
| Eritrea | 2019 | 0.803849 | 0.647501 |
| Estonia | 1990 | 1.274667 | 0.544356 |

|         |      |          |          |
|---------|------|----------|----------|
| Estonia | 1991 | 1.290002 | 0.556613 |
| Estonia | 1992 | 1.239721 | 0.541388 |
| Estonia | 1993 | 1.200974 | 0.542798 |
| Estonia | 1994 | 1.151173 | 0.550592 |
| Estonia | 1995 | 1.128166 | 0.54486  |
| Estonia | 1996 | 1.176935 | 0.562217 |
| Estonia | 1997 | 1.14876  | 0.552321 |
| Estonia | 1998 | 1.1261   | 0.544524 |
| Estonia | 1999 | 1.166972 | 0.555235 |
| Estonia | 2000 | 1.255561 | 0.597795 |
| Estonia | 2001 | 1.252541 | 0.599208 |
| Estonia | 2002 | 1.205019 | 0.568907 |
| Estonia | 2003 | 1.249495 | 0.580201 |
| Estonia | 2004 | 1.197993 | 0.548705 |
| Estonia | 2005 | 1.175965 | 0.531529 |
| Estonia | 2006 | 1.137999 | 0.513165 |
| Estonia | 2007 | 1.110521 | 0.499568 |
| Estonia | 2008 | 1.187032 | 0.526966 |
| Estonia | 2009 | 1.18254  | 0.520329 |
| Estonia | 2010 | 1.25962  | 0.543306 |
| Estonia | 2011 | 1.367921 | 0.587629 |
| Estonia | 2012 | 1.43354  | 0.605071 |
| Estonia | 2013 | 1.638015 | 0.678218 |
| Estonia | 2014 | 1.681019 | 0.688145 |
| Estonia | 2015 | 1.90245  | 0.76673  |

|    |          |      |          |          |
|----|----------|------|----------|----------|
| 1  |          |      |          |          |
| 2  |          |      |          |          |
| 3  |          |      |          |          |
| 4  |          |      |          |          |
| 5  | Estonia  | 2016 | 1.966618 | 0.787203 |
| 6  | Estonia  | 2017 | 1.978323 | 0.797514 |
| 7  | Estonia  | 2018 | 1.945837 | 0.792401 |
| 8  | Estonia  | 2019 | 1.91689  | 0.789282 |
| 9  | Eswatini | 1990 | 0.643432 | 0.445885 |
| 10 | Eswatini | 1991 | 0.655902 | 0.454929 |
| 11 | Eswatini | 1992 | 0.663034 | 0.459787 |
| 12 | Eswatini | 1993 | 0.659477 | 0.458163 |
| 13 | Eswatini | 1994 | 0.641934 | 0.450227 |
| 14 | Eswatini | 1995 | 0.629765 | 0.446376 |
| 15 | Eswatini | 1996 | 0.592986 | 0.428342 |
| 16 | Eswatini | 1997 | 0.575288 | 0.419633 |
| 17 | Eswatini | 1998 | 0.56769  | 0.418709 |
| 18 | Eswatini | 1999 | 0.58138  | 0.430021 |
| 19 | Eswatini | 2000 | 0.615204 | 0.455989 |
| 20 | Eswatini | 2001 | 0.622836 | 0.464538 |
| 21 | Eswatini | 2002 | 0.648366 | 0.482734 |
| 22 | Eswatini | 2003 | 0.645587 | 0.482052 |
| 23 | Eswatini | 2004 | 0.637776 | 0.475359 |
| 24 | Eswatini | 2005 | 0.637936 | 0.473051 |
| 25 | Eswatini | 2006 | 0.619484 | 0.459317 |
| 26 | Eswatini | 2007 | 0.596666 | 0.442398 |
| 27 | Eswatini | 2008 | 0.56799  | 0.420904 |
| 28 | Eswatini | 2009 | 0.549777 | 0.405457 |
| 29 | Eswatini | 2010 | 0.532729 | 0.390103 |
| 30 |          |      |          |          |
| 31 |          |      |          |          |
| 32 |          |      |          |          |
| 33 |          |      |          |          |
| 34 |          |      |          |          |
| 35 |          |      |          |          |
| 36 |          |      |          |          |
| 37 |          |      |          |          |
| 38 |          |      |          |          |
| 39 |          |      |          |          |
| 40 |          |      |          |          |
| 41 |          |      |          |          |
| 42 |          |      |          |          |
| 43 |          |      |          |          |
| 44 |          |      |          |          |
| 45 |          |      |          |          |
| 46 |          |      |          |          |

|          |      |          |          |
|----------|------|----------|----------|
| Eswatini | 2011 | 0.519468 | 0.377501 |
| Eswatini | 2012 | 0.512695 | 0.369766 |
| Eswatini | 2013 | 0.511534 | 0.36584  |
| Eswatini | 2014 | 0.513582 | 0.364059 |
| Eswatini | 2015 | 0.512443 | 0.360656 |
| Eswatini | 2016 | 0.510467 | 0.35706  |
| Eswatini | 2017 | 0.514681 | 0.357329 |
| Eswatini | 2018 | 0.519338 | 0.357931 |
| Eswatini | 2019 | 0.524167 | 0.358968 |
| Ethiopia | 1990 | 0.720756 | 0.703844 |
| Ethiopia | 1991 | 0.715509 | 0.706314 |
| Ethiopia | 1992 | 0.718831 | 0.717897 |
| Ethiopia | 1993 | 0.720067 | 0.728498 |
| Ethiopia | 1994 | 0.721361 | 0.73772  |
| Ethiopia | 1995 | 0.720699 | 0.743548 |
| Ethiopia | 1996 | 0.720125 | 0.749094 |
| Ethiopia | 1997 | 0.718258 | 0.753969 |
| Ethiopia | 1998 | 0.724515 | 0.767056 |
| Ethiopia | 1999 | 0.728246 | 0.775891 |
| Ethiopia | 2000 | 0.71538  | 0.766805 |
| Ethiopia | 2001 | 0.705973 | 0.758366 |
| Ethiopia | 2002 | 0.699858 | 0.754009 |
| Ethiopia | 2003 | 0.692711 | 0.749821 |
| Ethiopia | 2004 | 0.689158 | 0.749999 |
| Ethiopia | 2005 | 0.690604 | 0.752846 |

1  
2  
3  
4  
5  
6  
7  
8  
9  
10  
11  
12  
13  
14  
15  
16  
17  
18  
19  
20  
21  
22  
23  
24  
25  
26  
27  
28  
29  
30  
31  
32  
33  
34  
35  
36  
37  
38  
39  
40  
41  
42  
43  
44  
45  
46

|          |      |          |          |
|----------|------|----------|----------|
| Ethiopia | 2006 | 0.682452 | 0.745788 |
| Ethiopia | 2007 | 0.671544 | 0.734216 |
| Ethiopia | 2008 | 0.659778 | 0.722532 |
| Ethiopia | 2009 | 0.65182  | 0.715305 |
| Ethiopia | 2010 | 0.643618 | 0.708825 |
| Ethiopia | 2011 | 0.641285 | 0.705564 |
| Ethiopia | 2012 | 0.633994 | 0.697198 |
| Ethiopia | 2013 | 0.62824  | 0.691475 |
| Ethiopia | 2014 | 0.626243 | 0.687038 |
| Ethiopia | 2015 | 0.625936 | 0.68562  |
| Ethiopia | 2016 | 0.629331 | 0.686995 |
| Ethiopia | 2017 | 0.638242 | 0.693243 |
| Ethiopia | 2018 | 0.645523 | 0.699145 |
| Ethiopia | 2019 | 0.651966 | 0.705008 |
| Fiji     | 1990 | 0.73655  | 0.628208 |
| Fiji     | 1991 | 0.723556 | 0.608009 |
| Fiji     | 1992 | 0.714756 | 0.592527 |
| Fiji     | 1993 | 0.705691 | 0.578871 |
| Fiji     | 1994 | 0.69546  | 0.563871 |
| Fiji     | 1995 | 0.691654 | 0.557138 |
| Fiji     | 1996 | 0.700723 | 0.561307 |
| Fiji     | 1997 | 0.704771 | 0.562422 |
| Fiji     | 1998 | 0.706182 | 0.563969 |
| Fiji     | 1999 | 0.687221 | 0.548343 |
| Fiji     | 2000 | 0.689676 | 0.54438  |

|         |      |          |          |
|---------|------|----------|----------|
| Fiji    | 2001 | 0.674743 | 0.523954 |
| Fiji    | 2002 | 0.714503 | 0.533768 |
| Fiji    | 2003 | 0.766211 | 0.56517  |
| Fiji    | 2004 | 0.772718 | 0.564366 |
| Fiji    | 2005 | 0.738173 | 0.546633 |
| Fiji    | 2006 | 0.729158 | 0.534349 |
| Fiji    | 2007 | 0.744471 | 0.528667 |
| Fiji    | 2008 | 0.779592 | 0.571697 |
| Fiji    | 2009 | 0.799191 | 0.589837 |
| Fiji    | 2010 | 0.774052 | 0.569211 |
| Fiji    | 2011 | 0.744256 | 0.551047 |
| Fiji    | 2012 | 0.721319 | 0.541473 |
| Fiji    | 2013 | 0.719478 | 0.54105  |
| Fiji    | 2014 | 0.721526 | 0.53809  |
| Fiji    | 2015 | 0.728084 | 0.540392 |
| Fiji    | 2016 | 0.734806 | 0.543516 |
| Fiji    | 2017 | 0.741654 | 0.545391 |
| Fiji    | 2018 | 0.748133 | 0.547693 |
| Fiji    | 2019 | 0.754193 | 0.549577 |
| Finland | 1990 | 1.369762 | 0.651588 |
| Finland | 1991 | 1.404089 | 0.664806 |
| Finland | 1992 | 1.447397 | 0.683359 |
| Finland | 1993 | 1.473253 | 0.693502 |
| Finland | 1994 | 1.479108 | 0.699452 |
| Finland | 1995 | 1.437902 | 0.685172 |

|    |         |      |          |          |
|----|---------|------|----------|----------|
| 1  |         |      |          |          |
| 2  |         |      |          |          |
| 3  |         |      |          |          |
| 4  |         |      |          |          |
| 5  | Finland | 1996 | 1.4051   | 0.675676 |
| 6  | Finland | 1997 | 1.369332 | 0.663419 |
| 7  | Finland | 1998 | 1.273109 | 0.620794 |
| 8  | Finland | 1999 | 1.23956  | 0.605483 |
| 9  | Finland | 2000 | 1.255896 | 0.613356 |
| 10 | Finland | 2001 | 1.225525 | 0.599665 |
| 11 | Finland | 2002 | 1.211362 | 0.593411 |
| 12 | Finland | 2003 | 1.235058 | 0.606439 |
| 13 | Finland | 2004 | 1.240611 | 0.615839 |
| 14 | Finland | 2005 | 1.268837 | 0.630773 |
| 15 | Finland | 2006 | 1.315871 | 0.655994 |
| 16 | Finland | 2007 | 1.334793 | 0.667858 |
| 17 | Finland | 2008 | 1.346856 | 0.675729 |
| 18 | Finland | 2009 | 1.349785 | 0.681902 |
| 19 | Finland | 2010 | 1.368822 | 0.693519 |
| 20 | Finland | 2011 | 1.41426  | 0.719419 |
| 21 | Finland | 2012 | 1.442101 | 0.737073 |
| 22 | Finland | 2013 | 1.456253 | 0.75094  |
| 23 | Finland | 2014 | 1.463376 | 0.761748 |
| 24 | Finland | 2015 | 1.504316 | 0.790889 |
| 25 | Finland | 2016 | 1.486986 | 0.792614 |
| 26 | Finland | 2017 | 1.435595 | 0.779339 |
| 27 | Finland | 2018 | 1.41599  | 0.781929 |
| 28 | Finland | 2019 | 1.386159 | 0.777876 |
| 29 | France  | 1990 | 1.124202 | 0.523527 |
| 30 |         |      |          |          |
| 31 |         |      |          |          |
| 32 |         |      |          |          |
| 33 |         |      |          |          |
| 34 |         |      |          |          |
| 35 |         |      |          |          |
| 36 |         |      |          |          |
| 37 |         |      |          |          |
| 38 |         |      |          |          |
| 39 |         |      |          |          |
| 40 |         |      |          |          |
| 41 |         |      |          |          |
| 42 |         |      |          |          |
| 43 |         |      |          |          |
| 44 |         |      |          |          |
| 45 |         |      |          |          |
| 46 |         |      |          |          |

|    |        |      |          |          |
|----|--------|------|----------|----------|
| 1  |        |      |          |          |
| 2  |        |      |          |          |
| 3  |        |      |          |          |
| 4  |        |      |          |          |
| 5  | France | 1991 | 1.122316 | 0.524504 |
| 6  | France | 1992 | 1.12034  | 0.524787 |
| 7  | France | 1993 | 1.117802 | 0.526191 |
| 8  | France | 1994 | 1.118268 | 0.528797 |
| 9  | France | 1995 | 1.112993 | 0.527024 |
| 10 | France | 1996 | 1.101909 | 0.522307 |
| 11 | France | 1997 | 1.105504 | 0.522596 |
| 12 | France | 1998 | 1.107177 | 0.530535 |
| 13 | France | 1999 | 1.10903  | 0.534938 |
| 14 | France | 2000 | 1.107854 | 0.537168 |
| 15 | France | 2001 | 1.110105 | 0.543565 |
| 16 | France | 2002 | 1.102    | 0.545481 |
| 17 | France | 2003 | 1.084393 | 0.542172 |
| 18 | France | 2004 | 1.077414 | 0.54228  |
| 19 | France | 2005 | 1.06193  | 0.535116 |
| 20 | France | 2006 | 1.067723 | 0.539183 |
| 21 | France | 2007 | 1.075779 | 0.545688 |
| 22 | France | 2008 | 1.090466 | 0.555471 |
| 23 | France | 2009 | 1.07957  | 0.551918 |
| 24 | France | 2010 | 1.086085 | 0.553398 |
| 25 | France | 2011 | 1.095191 | 0.55705  |
| 26 | France | 2012 | 1.104754 | 0.562202 |
| 27 | France | 2013 | 1.102879 | 0.564467 |
| 28 | France | 2014 | 1.10743  | 0.570799 |
| 29 | France | 2015 | 1.089102 | 0.563704 |
| 30 |        |      |          |          |
| 31 |        |      |          |          |
| 32 |        |      |          |          |
| 33 |        |      |          |          |
| 34 |        |      |          |          |
| 35 |        |      |          |          |
| 36 |        |      |          |          |
| 37 |        |      |          |          |
| 38 |        |      |          |          |
| 39 |        |      |          |          |
| 40 |        |      |          |          |
| 41 |        |      |          |          |
| 42 |        |      |          |          |
| 43 |        |      |          |          |
| 44 |        |      |          |          |
| 45 |        |      |          |          |
| 46 |        |      |          |          |



|    |        |      |          |          |
|----|--------|------|----------|----------|
| 1  |        |      |          |          |
| 2  |        |      |          |          |
| 3  |        |      |          |          |
| 4  |        |      |          |          |
| 5  | France | 2016 | 1.076047 | 0.555978 |
| 6  | France | 2017 | 1.062053 | 0.548646 |
| 7  | France | 2018 | 1.078987 | 0.558974 |
| 8  | France | 2019 | 1.072237 | 0.558669 |
| 9  |        |      |          |          |
| 10 | Gabon  | 1990 | 0.663018 | 0.510695 |
| 11 | Gabon  | 1991 | 0.671655 | 0.519702 |
| 12 | Gabon  | 1992 | 0.671388 | 0.52192  |
| 13 | Gabon  | 1993 | 0.685336 | 0.532449 |
| 14 | Gabon  | 1994 | 0.707166 | 0.549661 |
| 15 | Gabon  | 1995 | 0.711069 | 0.555824 |
| 16 | Gabon  | 1996 | 0.747609 | 0.582971 |
| 17 | Gabon  | 1997 | 0.769173 | 0.598567 |
| 18 | Gabon  | 1998 | 0.796265 | 0.617671 |
| 19 | Gabon  | 1999 | 0.831864 | 0.641644 |
| 20 | Gabon  | 2000 | 0.848369 | 0.653986 |
| 21 | Gabon  | 2001 | 0.876541 | 0.676621 |
| 22 | Gabon  | 2002 | 0.887885 | 0.685029 |
| 23 | Gabon  | 2003 | 0.917659 | 0.709144 |
| 24 | Gabon  | 2004 | 0.940511 | 0.72639  |
| 25 | Gabon  | 2005 | 0.941471 | 0.727273 |
| 26 | Gabon  | 2006 | 0.957229 | 0.739157 |
| 27 | Gabon  | 2007 | 0.939534 | 0.730543 |
| 28 | Gabon  | 2008 | 0.943992 | 0.736346 |
| 29 | Gabon  | 2009 | 0.937137 | 0.731371 |
| 30 | Gabon  | 2010 | 0.928266 | 0.72189  |
| 31 |        |      |          |          |
| 32 |        |      |          |          |
| 33 |        |      |          |          |
| 34 |        |      |          |          |
| 35 |        |      |          |          |
| 36 |        |      |          |          |
| 37 |        |      |          |          |
| 38 |        |      |          |          |
| 39 |        |      |          |          |
| 40 |        |      |          |          |
| 41 |        |      |          |          |
| 42 |        |      |          |          |
| 43 |        |      |          |          |
| 44 |        |      |          |          |
| 45 |        |      |          |          |
| 46 |        |      |          |          |

|    |        |      |          |          |
|----|--------|------|----------|----------|
| 1  |        |      |          |          |
| 2  |        |      |          |          |
| 3  |        |      |          |          |
| 4  |        |      |          |          |
| 5  | Gabon  | 2011 | 0.931747 | 0.725053 |
| 6  | Gabon  | 2012 | 0.920242 | 0.718091 |
| 7  | Gabon  | 2013 | 0.907997 | 0.709801 |
| 8  | Gabon  | 2014 | 0.913089 | 0.712937 |
| 9  | Gabon  | 2015 | 0.921649 | 0.71807  |
| 10 | Gabon  | 2016 | 0.920729 | 0.721385 |
| 11 | Gabon  | 2017 | 0.921713 | 0.725495 |
| 12 | Gabon  | 2018 | 0.922917 | 0.729617 |
| 13 | Gabon  | 2019 | 0.923103 | 0.73276  |
| 14 | Gambia | 1990 | 0.755805 | 0.755747 |
| 15 | Gambia | 1991 | 0.756823 | 0.756088 |
| 16 | Gambia | 1992 | 0.758184 | 0.75924  |
| 17 | Gambia | 1993 | 0.758936 | 0.757261 |
| 18 | Gambia | 1994 | 0.755326 | 0.750572 |
| 19 | Gambia | 1995 | 0.753686 | 0.753222 |
| 20 | Gambia | 1996 | 0.751364 | 0.743599 |
| 21 | Gambia | 1997 | 0.749738 | 0.739091 |
| 22 | Gambia | 1998 | 0.750354 | 0.73916  |
| 23 | Gambia | 1999 | 0.743484 | 0.732456 |
| 24 | Gambia | 2000 | 0.74646  | 0.72468  |
| 25 | Gambia | 2001 | 0.746679 | 0.717698 |
| 26 | Gambia | 2002 | 0.747766 | 0.711503 |
| 27 | Gambia | 2003 | 0.752355 | 0.712861 |
| 28 | Gambia | 2004 | 0.755842 | 0.713817 |
| 29 | Gambia | 2005 | 0.755955 | 0.71042  |
| 30 |        |      |          |          |
| 31 |        |      |          |          |
| 32 |        |      |          |          |
| 33 |        |      |          |          |
| 34 |        |      |          |          |
| 35 |        |      |          |          |
| 36 |        |      |          |          |
| 37 |        |      |          |          |
| 38 |        |      |          |          |
| 39 |        |      |          |          |
| 40 |        |      |          |          |
| 41 |        |      |          |          |
| 42 |        |      |          |          |
| 43 |        |      |          |          |
| 44 |        |      |          |          |
| 45 |        |      |          |          |
| 46 |        |      |          |          |

|         |      |          |          |
|---------|------|----------|----------|
| Gambia  | 2006 | 0.757416 | 0.705952 |
| Gambia  | 2007 | 0.75523  | 0.700773 |
| Gambia  | 2008 | 0.754458 | 0.692666 |
| Gambia  | 2009 | 0.752537 | 0.689476 |
| Gambia  | 2010 | 0.753068 | 0.686471 |
| Gambia  | 2011 | 0.755772 | 0.679598 |
| Gambia  | 2012 | 0.759236 | 0.680795 |
| Gambia  | 2013 | 0.756697 | 0.679521 |
| Gambia  | 2014 | 0.763619 | 0.690755 |
| Gambia  | 2015 | 0.769482 | 0.692325 |
| Gambia  | 2016 | 0.773885 | 0.699811 |
| Gambia  | 2017 | 0.778738 | 0.706126 |
| Gambia  | 2018 | 0.781179 | 0.70658  |
| Gambia  | 2019 | 0.783745 | 0.708702 |
| Georgia | 1990 | 0.890262 | 0.542133 |
| Georgia | 1991 | 0.872831 | 0.536789 |
| Georgia | 1992 | 0.850246 | 0.525619 |
| Georgia | 1993 | 0.863035 | 0.531854 |
| Georgia | 1994 | 0.862277 | 0.535854 |
| Georgia | 1995 | 0.840688 | 0.527101 |
| Georgia | 1996 | 0.842497 | 0.532042 |
| Georgia | 1997 | 0.82724  | 0.521857 |
| Georgia | 1998 | 0.793438 | 0.501139 |
| Georgia | 1999 | 0.801938 | 0.500857 |
| Georgia | 2000 | 0.879865 | 0.543389 |

|         |      |          |          |
|---------|------|----------|----------|
| Georgia | 2001 | 0.899387 | 0.565607 |
| Georgia | 2002 | 0.884306 | 0.551759 |
| Georgia | 2003 | 0.910865 | 0.563177 |
| Georgia | 2004 | 0.933848 | 0.577696 |
| Georgia | 2005 | 0.978952 | 0.607314 |
| Georgia | 2006 | 0.962763 | 0.605212 |
| Georgia | 2007 | 0.930799 | 0.599638 |
| Georgia | 2008 | 0.915016 | 0.592516 |
| Georgia | 2009 | 0.943313 | 0.605152 |
| Georgia | 2010 | 0.947623 | 0.596383 |
| Georgia | 2011 | 0.95614  | 0.599604 |
| Georgia | 2012 | 0.978096 | 0.606573 |
| Georgia | 2013 | 1.014494 | 0.623579 |
| Georgia | 2014 | 0.991503 | 0.604425 |
| Georgia | 2015 | 0.965315 | 0.584449 |
| Georgia | 2016 | 0.950849 | 0.575343 |
| Georgia | 2017 | 0.947486 | 0.573143 |
| Georgia | 2018 | 0.940168 | 0.571439 |
| Georgia | 2019 | 0.93624  | 0.569532 |
| Germany | 1990 | 1.487969 | 0.738576 |
| Germany | 1991 | 1.466275 | 0.722103 |
| Germany | 1992 | 1.461023 | 0.715904 |
| Germany | 1993 | 1.449296 | 0.70554  |
| Germany | 1994 | 1.444447 | 0.697681 |
| Germany | 1995 | 1.444922 | 0.689009 |

|         |      |          |          |
|---------|------|----------|----------|
| Germany | 1996 | 1.453565 | 0.686347 |
| Germany | 1997 | 1.483836 | 0.696893 |
| Germany | 1998 | 1.514594 | 0.710752 |
| Germany | 1999 | 1.533725 | 0.718637 |
| Germany | 2000 | 1.553591 | 0.722254 |
| Germany | 2001 | 1.573124 | 0.730431 |
| Germany | 2002 | 1.582824 | 0.736649 |
| Germany | 2003 | 1.574148 | 0.73842  |
| Germany | 2004 | 1.599898 | 0.756378 |
| Germany | 2005 | 1.612897 | 0.768233 |
| Germany | 2006 | 1.602888 | 0.772032 |
| Germany | 2007 | 1.593446 | 0.782936 |
| Germany | 2008 | 1.578264 | 0.792426 |
| Germany | 2009 | 1.556308 | 0.796146 |
| Germany | 2010 | 1.52725  | 0.787571 |
| Germany | 2011 | 1.537922 | 0.783764 |
| Germany | 2012 | 1.527116 | 0.781158 |
| Germany | 2013 | 1.517234 | 0.781468 |
| Germany | 2014 | 1.517122 | 0.78274  |
| Germany | 2015 | 1.509834 | 0.785566 |
| Germany | 2016 | 1.518061 | 0.798449 |
| Germany | 2017 | 1.476666 | 0.804041 |
| Germany | 2018 | 1.444126 | 0.80565  |
| Germany | 2019 | 1.416778 | 0.808654 |
| Ghana   | 1990 | 1.389388 | 1.181071 |

|       |      |          |          |
|-------|------|----------|----------|
| Ghana | 1991 | 1.395297 | 1.186086 |
| Ghana | 1992 | 1.406856 | 1.198388 |
| Ghana | 1993 | 1.408088 | 1.203505 |
| Ghana | 1994 | 1.396314 | 1.196408 |
| Ghana | 1995 | 1.382803 | 1.186929 |
| Ghana | 1996 | 1.372057 | 1.179342 |
| Ghana | 1997 | 1.34008  | 1.155532 |
| Ghana | 1998 | 1.304774 | 1.127515 |
| Ghana | 1999 | 1.250913 | 1.082697 |
| Ghana | 2000 | 1.228704 | 1.061556 |
| Ghana | 2001 | 1.221506 | 1.049951 |
| Ghana | 2002 | 1.201741 | 1.027726 |
| Ghana | 2003 | 1.174967 | 1.001459 |
| Ghana | 2004 | 1.13319  | 0.962102 |
| Ghana | 2005 | 1.104291 | 0.932732 |
| Ghana | 2006 | 1.079481 | 0.906283 |
| Ghana | 2007 | 1.070195 | 0.892958 |
| Ghana | 2008 | 1.057559 | 0.875779 |
| Ghana | 2009 | 1.052341 | 0.864954 |
| Ghana | 2010 | 1.05498  | 0.860277 |
| Ghana | 2011 | 1.049814 | 0.85044  |
| Ghana | 2012 | 1.043791 | 0.839396 |
| Ghana | 2013 | 1.043172 | 0.832323 |
| Ghana | 2014 | 1.057851 | 0.837805 |
| Ghana | 2015 | 1.068515 | 0.839101 |

1  
2  
3  
4  
5  
6  
7  
8  
9  
10  
11  
12  
13  
14  
15  
16  
17  
18  
19  
20  
21  
22  
23  
24  
25  
26  
27  
28  
29  
30  
31  
32  
33  
34  
35  
36  
37  
38  
39  
40  
41  
42  
43  
44  
45  
46

|        |      |          |          |
|--------|------|----------|----------|
| Ghana  | 2016 | 1.087431 | 0.848637 |
| Ghana  | 2017 | 1.108864 | 0.860005 |
| Ghana  | 2018 | 1.125883 | 0.868676 |
| Ghana  | 2019 | 1.142967 | 0.877856 |
| Greece | 1990 | 1.161016 | 0.870098 |
| Greece | 1991 | 1.167773 | 0.882825 |
| Greece | 1992 | 1.161076 | 0.883274 |
| Greece | 1993 | 1.161909 | 0.888873 |
| Greece | 1994 | 1.167579 | 0.899013 |
| Greece | 1995 | 1.161049 | 0.897684 |
| Greece | 1996 | 1.147164 | 0.891019 |
| Greece | 1997 | 1.144252 | 0.892744 |
| Greece | 1998 | 1.149091 | 0.900029 |
| Greece | 1999 | 1.119722 | 0.880614 |
| Greece | 2000 | 1.101564 | 0.871094 |
| Greece | 2001 | 1.115135 | 0.886731 |
| Greece | 2002 | 1.140613 | 0.916072 |
| Greece | 2003 | 1.15732  | 0.940811 |
| Greece | 2004 | 1.159749 | 0.955428 |
| Greece | 2005 | 1.163923 | 0.972318 |
| Greece | 2006 | 1.182637 | 0.993248 |
| Greece | 2007 | 1.175831 | 0.97592  |
| Greece | 2008 | 1.190464 | 0.969062 |
| Greece | 2009 | 1.153453 | 0.941996 |
| Greece | 2010 | 1.136643 | 0.928388 |

|    |           |      |          |          |
|----|-----------|------|----------|----------|
| 1  |           |      |          |          |
| 2  |           |      |          |          |
| 3  |           |      |          |          |
| 4  |           |      |          |          |
| 5  | Greece    | 2011 | 1.105891 | 0.892206 |
| 6  | Greece    | 2012 | 1.086592 | 0.867041 |
| 7  | Greece    | 2013 | 1.079777 | 0.850836 |
| 8  | Greece    | 2014 | 1.04619  | 0.814348 |
| 9  | Greece    | 2015 | 1.030625 | 0.789385 |
| 10 | Greece    | 2016 | 1.028167 | 0.775855 |
| 11 | Greece    | 2017 | 1.037304 | 0.773643 |
| 12 | Greece    | 2018 | 1.091329 | 0.802598 |
| 13 | Greece    | 2019 | 1.105053 | 0.80773  |
| 14 | Greenland | 1990 | 0.849346 | 0.693694 |
| 15 | Greenland | 1991 | 0.859043 | 0.699506 |
| 16 | Greenland | 1992 | 0.874645 | 0.708875 |
| 17 | Greenland | 1993 | 1.013236 | 0.83206  |
| 18 | Greenland | 1994 | 1.037787 | 0.873406 |
| 19 | Greenland | 1995 | 1.033608 | 0.886208 |
| 20 | Greenland | 1996 | 1.060839 | 0.925261 |
| 21 | Greenland | 1997 | 1.091328 | 0.971297 |
| 22 | Greenland | 1998 | 1.046899 | 0.961443 |
| 23 | Greenland | 1999 | 0.997845 | 0.942449 |
| 24 | Greenland | 2000 | 0.94211  | 0.901702 |
| 25 | Greenland | 2001 | 0.936488 | 0.907813 |
| 26 | Greenland | 2002 | 0.927296 | 0.904154 |
| 27 | Greenland | 2003 | 0.835465 | 0.819147 |
| 28 | Greenland | 2004 | 0.69175  | 0.688599 |
| 29 | Greenland | 2005 | 0.709612 | 0.700803 |
| 30 |           |      |          |          |
| 31 |           |      |          |          |
| 32 |           |      |          |          |
| 33 |           |      |          |          |
| 34 |           |      |          |          |
| 35 |           |      |          |          |
| 36 |           |      |          |          |
| 37 |           |      |          |          |
| 38 |           |      |          |          |
| 39 |           |      |          |          |
| 40 |           |      |          |          |
| 41 |           |      |          |          |
| 42 |           |      |          |          |
| 43 |           |      |          |          |
| 44 |           |      |          |          |
| 45 |           |      |          |          |
| 46 |           |      |          |          |



1  
2  
3  
4  
5  
6  
7  
8  
9  
10  
11  
12  
13  
14  
15  
16  
17  
18  
19  
20  
21  
22  
23  
24  
25  
26  
27  
28  
29  
30  
31  
32  
33  
34  
35  
36  
37  
38  
39  
40  
41  
42  
43  
44  
45  
46

|           |      |          |          |
|-----------|------|----------|----------|
| Greenland | 2006 | 0.706598 | 0.692802 |
| Greenland | 2007 | 0.705793 | 0.686308 |
| Greenland | 2008 | 0.700539 | 0.680087 |
| Greenland | 2009 | 0.683503 | 0.668978 |
| Greenland | 2010 | 0.672699 | 0.652435 |
| Greenland | 2011 | 0.660619 | 0.635534 |
| Greenland | 2012 | 0.635943 | 0.609095 |
| Greenland | 2013 | 0.625224 | 0.595312 |
| Greenland | 2014 | 0.621571 | 0.594696 |
| Greenland | 2015 | 0.622625 | 0.590524 |
| Greenland | 2016 | 0.63024  | 0.59461  |
| Greenland | 2017 | 0.631927 | 0.596305 |
| Greenland | 2018 | 0.636475 | 0.598319 |
| Greenland | 2019 | 0.633015 | 0.600239 |
| Grenada   | 1990 | 0.797821 | 0.554947 |
| Grenada   | 1991 | 0.791908 | 0.547582 |
| Grenada   | 1992 | 0.797965 | 0.545611 |
| Grenada   | 1993 | 0.866844 | 0.585903 |
| Grenada   | 1994 | 0.868726 | 0.585653 |
| Grenada   | 1995 | 0.866269 | 0.584739 |
| Grenada   | 1996 | 0.831677 | 0.564078 |
| Grenada   | 1997 | 0.811707 | 0.552665 |
| Grenada   | 1998 | 0.799312 | 0.544226 |
| Grenada   | 1999 | 0.688282 | 0.455645 |
| Grenada   | 2000 | 0.68774  | 0.439827 |

|         |      |          |          |
|---------|------|----------|----------|
| Grenada | 2001 | 0.702495 | 0.43759  |
| Grenada | 2002 | 0.711655 | 0.432377 |
| Grenada | 2003 | 0.71962  | 0.428494 |
| Grenada | 2004 | 0.732755 | 0.430247 |
| Grenada | 2005 | 0.760413 | 0.437206 |
| Grenada | 2006 | 0.78936  | 0.443967 |
| Grenada | 2007 | 0.822661 | 0.462776 |
| Grenada | 2008 | 0.842693 | 0.483301 |
| Grenada | 2009 | 0.882412 | 0.508339 |
| Grenada | 2010 | 0.903844 | 0.527307 |
| Grenada | 2011 | 0.928404 | 0.573847 |
| Grenada | 2012 | 1.001204 | 0.718206 |
| Grenada | 2013 | 0.981917 | 0.7194   |
| Grenada | 2014 | 0.951772 | 0.711073 |
| Grenada | 2015 | 0.919374 | 0.703207 |
| Grenada | 2016 | 0.859129 | 0.659112 |
| Grenada | 2017 | 0.835568 | 0.652602 |
| Grenada | 2018 | 0.826236 | 0.657412 |
| Grenada | 2019 | 0.810856 | 0.655619 |
| Guam    | 1990 | 1.204419 | 1.189679 |
| Guam    | 1991 | 1.208766 | 1.188058 |
| Guam    | 1992 | 1.195287 | 1.167342 |
| Guam    | 1993 | 1.16717  | 1.105228 |
| Guam    | 1994 | 1.107875 | 1.004316 |
| Guam    | 1995 | 1.172072 | 1.084015 |

1  
2  
3  
4  
5  
6  
7  
8  
9  
10  
11  
12  
13  
14  
15  
16  
17  
18  
19  
20  
21  
22  
23  
24  
25  
26  
27  
28  
29  
30  
31  
32  
33  
34  
35  
36  
37  
38  
39  
40  
41  
42  
43  
44  
45  
46

|           |      |          |          |
|-----------|------|----------|----------|
| Guam      | 1996 | 1.186921 | 1.127987 |
| Guam      | 1997 | 1.133647 | 1.085355 |
| Guam      | 1998 | 1.1296   | 1.075936 |
| Guam      | 1999 | 1.158874 | 1.091652 |
| Guam      | 2000 | 1.174389 | 1.100938 |
| Guam      | 2001 | 1.203948 | 1.136096 |
| Guam      | 2002 | 1.200842 | 1.132682 |
| Guam      | 2003 | 1.238955 | 1.160038 |
| Guam      | 2004 | 1.113806 | 1.021279 |
| Guam      | 2005 | 0.964523 | 0.850896 |
| Guam      | 2006 | 0.944381 | 0.819772 |
| Guam      | 2007 | 0.929106 | 0.797947 |
| Guam      | 2008 | 0.923572 | 0.78604  |
| Guam      | 2009 | 0.931624 | 0.788499 |
| Guam      | 2010 | 0.940753 | 0.797387 |
| Guam      | 2011 | 0.956968 | 0.812158 |
| Guam      | 2012 | 0.983131 | 0.836726 |
| Guam      | 2013 | 1.004146 | 0.860112 |
| Guam      | 2014 | 1.001106 | 0.863148 |
| Guam      | 2015 | 1.003953 | 0.86564  |
| Guam      | 2016 | 0.994553 | 0.85511  |
| Guam      | 2017 | 1.009881 | 0.866865 |
| Guam      | 2018 | 1.025338 | 0.885139 |
| Guam      | 2019 | 1.062923 | 0.918484 |
| Guatemala | 1990 | 0.953023 | 0.953895 |

|           |      |          |          |
|-----------|------|----------|----------|
| Guatemala | 1991 | 0.933729 | 0.929254 |
| Guatemala | 1992 | 0.92926  | 0.918512 |
| Guatemala | 1993 | 0.914013 | 0.90221  |
| Guatemala | 1994 | 0.896312 | 0.885135 |
| Guatemala | 1995 | 0.890006 | 0.871973 |
| Guatemala | 1996 | 0.901921 | 0.86863  |
| Guatemala | 1997 | 0.899852 | 0.857182 |
| Guatemala | 1998 | 0.872046 | 0.812846 |
| Guatemala | 1999 | 0.865173 | 0.791137 |
| Guatemala | 2000 | 0.863256 | 0.781043 |
| Guatemala | 2001 | 0.820782 | 0.743524 |
| Guatemala | 2002 | 0.83644  | 0.740421 |
| Guatemala | 2003 | 0.84415  | 0.738636 |
| Guatemala | 2004 | 0.843046 | 0.720606 |
| Guatemala | 2005 | 0.838576 | 0.707155 |
| Guatemala | 2006 | 0.856915 | 0.71003  |
| Guatemala | 2007 | 0.868494 | 0.712748 |
| Guatemala | 2008 | 0.88503  | 0.714982 |
| Guatemala | 2009 | 0.910003 | 0.728899 |
| Guatemala | 2010 | 0.930968 | 0.739534 |
| Guatemala | 2011 | 0.943079 | 0.746912 |
| Guatemala | 2012 | 0.956022 | 0.754441 |
| Guatemala | 2013 | 0.95592  | 0.752758 |
| Guatemala | 2014 | 0.970023 | 0.757865 |
| Guatemala | 2015 | 0.969041 | 0.752183 |

|               |      |          |          |
|---------------|------|----------|----------|
| Guatemala     | 2016 | 0.983854 | 0.758866 |
| Guatemala     | 2017 | 0.994562 | 0.768067 |
| Guatemala     | 2018 | 0.99077  | 0.763013 |
| Guatemala     | 2019 | 0.995586 | 0.764309 |
| Guinea-Bissau | 1990 | 0.748122 | 0.670412 |
| Guinea-Bissau | 1991 | 0.75664  | 0.671111 |
| Guinea-Bissau | 1992 | 0.764453 | 0.671795 |
| Guinea-Bissau | 1993 | 0.770896 | 0.671429 |
| Guinea-Bissau | 1994 | 0.775841 | 0.67024  |
| Guinea-Bissau | 1995 | 0.778009 | 0.667293 |
| Guinea-Bissau | 1996 | 0.781511 | 0.664792 |
| Guinea-Bissau | 1997 | 0.784534 | 0.662213 |
| Guinea-Bissau | 1998 | 0.781983 | 0.655103 |
| Guinea-Bissau | 1999 | 0.773202 | 0.643304 |
| Guinea-Bissau | 2000 | 0.774928 | 0.639101 |
| Guinea-Bissau | 2001 | 0.769671 | 0.63055  |
| Guinea-Bissau | 2002 | 0.776817 | 0.632411 |
| Guinea-Bissau | 2003 | 0.783424 | 0.634572 |
| Guinea-Bissau | 2004 | 0.781804 | 0.630986 |
| Guinea-Bissau | 2005 | 0.777461 | 0.625183 |
| Guinea-Bissau | 2006 | 0.785814 | 0.629214 |
| Guinea-Bissau | 2007 | 0.790956 | 0.63183  |
| Guinea-Bissau | 2008 | 0.789619 | 0.630173 |
| Guinea-Bissau | 2009 | 0.791031 | 0.630407 |
| Guinea-Bissau | 2010 | 0.788492 | 0.627204 |

|               |      |          |          |
|---------------|------|----------|----------|
| Guinea-Bissau | 2011 | 0.780258 | 0.621232 |
| Guinea-Bissau | 2012 | 0.77979  | 0.621828 |
| Guinea-Bissau | 2013 | 0.775523 | 0.619504 |
| Guinea-Bissau | 2014 | 0.781231 | 0.623934 |
| Guinea-Bissau | 2015 | 0.785211 | 0.627208 |
| Guinea-Bissau | 2016 | 0.790123 | 0.632173 |
| Guinea-Bissau | 2017 | 0.794982 | 0.636694 |
| Guinea-Bissau | 2018 | 0.794557 | 0.636869 |
| Guinea-Bissau | 2019 | 0.79691  | 0.639962 |
| Guinea        | 1990 | 1.106482 | 1.06805  |
| Guinea        | 1991 | 1.101821 | 1.062402 |
| Guinea        | 1992 | 1.092566 | 1.051668 |
| Guinea        | 1993 | 1.079614 | 1.036735 |
| Guinea        | 1994 | 1.063496 | 1.018359 |
| Guinea        | 1995 | 1.044157 | 0.994427 |
| Guinea        | 1996 | 1.023563 | 0.970226 |
| Guinea        | 1997 | 1.003974 | 0.94782  |
| Guinea        | 1998 | 0.984752 | 0.924564 |
| Guinea        | 1999 | 0.959149 | 0.894479 |
| Guinea        | 2000 | 0.948271 | 0.875656 |
| Guinea        | 2001 | 0.93673  | 0.86105  |
| Guinea        | 2002 | 0.926789 | 0.848561 |
| Guinea        | 2003 | 0.921873 | 0.840532 |
| Guinea        | 2004 | 0.914807 | 0.83004  |
| Guinea        | 2005 | 0.909379 | 0.821056 |

|        |      |          |          |
|--------|------|----------|----------|
| Guinea | 2006 | 0.897855 | 0.809873 |
| Guinea | 2007 | 0.88313  | 0.797058 |
| Guinea | 2008 | 0.8682   | 0.784253 |
| Guinea | 2009 | 0.856308 | 0.774402 |
| Guinea | 2010 | 0.844945 | 0.765219 |
| Guinea | 2011 | 0.838392 | 0.761209 |
| Guinea | 2012 | 0.832401 | 0.75916  |
| Guinea | 2013 | 0.825926 | 0.757267 |
| Guinea | 2014 | 0.825605 | 0.761087 |
| Guinea | 2015 | 0.827532 | 0.766111 |
| Guinea | 2016 | 0.830462 | 0.774096 |
| Guinea | 2017 | 0.833695 | 0.783024 |
| Guinea | 2018 | 0.834033 | 0.789338 |
| Guinea | 2019 | 0.836231 | 0.796133 |
| Guyana | 1990 | 0.804795 | 0.730845 |
| Guyana | 1991 | 0.825743 | 0.745172 |
| Guyana | 1992 | 0.815942 | 0.730925 |
| Guyana | 1993 | 0.815344 | 0.715393 |
| Guyana | 1994 | 0.833385 | 0.730953 |
| Guyana | 1995 | 0.82273  | 0.725093 |
| Guyana | 1996 | 0.826799 | 0.72395  |
| Guyana | 1997 | 0.801758 | 0.710721 |
| Guyana | 1998 | 0.804478 | 0.710939 |
| Guyana | 1999 | 0.816289 | 0.717467 |
| Guyana | 2000 | 0.851078 | 0.75824  |

|        |      |          |          |
|--------|------|----------|----------|
| Guyana | 2001 | 0.856085 | 0.770243 |
| Guyana | 2002 | 0.868114 | 0.792286 |
| Guyana | 2003 | 0.88199  | 0.808553 |
| Guyana | 2004 | 0.881747 | 0.805175 |
| Guyana | 2005 | 0.876973 | 0.799695 |
| Guyana | 2006 | 0.86259  | 0.785305 |
| Guyana | 2007 | 0.871755 | 0.796174 |
| Guyana | 2008 | 0.866064 | 0.79292  |
| Guyana | 2009 | 0.856384 | 0.776095 |
| Guyana | 2010 | 0.870928 | 0.791752 |
| Guyana | 2011 | 0.864618 | 0.787339 |
| Guyana | 2012 | 0.858249 | 0.769835 |
| Guyana | 2013 | 0.868019 | 0.754845 |
| Guyana | 2014 | 0.883459 | 0.756936 |
| Guyana | 2015 | 0.904528 | 0.783773 |
| Guyana | 2016 | 0.909773 | 0.785122 |
| Guyana | 2017 | 0.907778 | 0.779852 |
| Guyana | 2018 | 0.916706 | 0.792253 |
| Guyana | 2019 | 0.917252 | 0.792395 |
| Haiti  | 1990 | 0.848252 | 0.694669 |
| Haiti  | 1991 | 0.851834 | 0.699622 |
| Haiti  | 1992 | 0.858366 | 0.705985 |
| Haiti  | 1993 | 0.868323 | 0.715498 |
| Haiti  | 1994 | 0.889488 | 0.733226 |
| Haiti  | 1995 | 0.884666 | 0.730909 |



|          |      |          |          |
|----------|------|----------|----------|
| Haiti    | 1996 | 0.885902 | 0.73329  |
| Haiti    | 1997 | 0.88977  | 0.737561 |
| Haiti    | 1998 | 0.897728 | 0.746391 |
| Haiti    | 1999 | 0.918178 | 0.763662 |
| Haiti    | 2000 | 0.933843 | 0.777576 |
| Haiti    | 2001 | 0.952387 | 0.793799 |
| Haiti    | 2002 | 0.965378 | 0.805915 |
| Haiti    | 2003 | 0.979128 | 0.818581 |
| Haiti    | 2004 | 0.996137 | 0.833853 |
| Haiti    | 2005 | 1.011615 | 0.848181 |
| Haiti    | 2006 | 1.003287 | 0.843106 |
| Haiti    | 2007 | 0.991817 | 0.835123 |
| Haiti    | 2008 | 0.977956 | 0.825209 |
| Haiti    | 2009 | 0.969319 | 0.818318 |
| Haiti    | 2010 | 0.971384 | 0.814256 |
| Haiti    | 2011 | 0.977353 | 0.812342 |
| Haiti    | 2012 | 0.970589 | 0.807299 |
| Haiti    | 2013 | 0.964412 | 0.801409 |
| Haiti    | 2014 | 0.961933 | 0.797931 |
| Haiti    | 2015 | 0.961316 | 0.795943 |
| Haiti    | 2016 | 0.958705 | 0.793089 |
| Haiti    | 2017 | 0.953425 | 0.7883   |
| Haiti    | 2018 | 0.949688 | 0.78419  |
| Haiti    | 2019 | 0.950462 | 0.784143 |
| Honduras | 1990 | 0.931423 | 0.792876 |

|          |      |          |          |
|----------|------|----------|----------|
| Honduras | 1991 | 0.893526 | 0.757388 |
| Honduras | 1992 | 0.98682  | 0.839842 |
| Honduras | 1993 | 0.96852  | 0.824803 |
| Honduras | 1994 | 0.959285 | 0.818048 |
| Honduras | 1995 | 1.132512 | 0.982388 |
| Honduras | 1996 | 1.204171 | 1.080562 |
| Honduras | 1997 | 1.196654 | 1.084657 |
| Honduras | 1998 | 1.188782 | 1.087144 |
| Honduras | 1999 | 1.177838 | 1.086961 |
| Honduras | 2000 | 1.167179 | 1.085797 |
| Honduras | 2001 | 1.166044 | 1.09074  |
| Honduras | 2002 | 1.190753 | 1.118393 |
| Honduras | 2003 | 1.220312 | 1.149288 |
| Honduras | 2004 | 1.21409  | 1.147758 |
| Honduras | 2005 | 1.210856 | 1.145859 |
| Honduras | 2006 | 1.206554 | 1.142104 |
| Honduras | 2007 | 1.201772 | 1.137077 |
| Honduras | 2008 | 1.193002 | 1.129034 |
| Honduras | 2009 | 1.17622  | 1.114785 |
| Honduras | 2010 | 1.158652 | 1.099057 |
| Honduras | 2011 | 1.132415 | 1.071005 |
| Honduras | 2012 | 1.049605 | 0.966428 |
| Honduras | 2013 | 1.061289 | 0.964852 |
| Honduras | 2014 | 1.072882 | 0.964053 |
| Honduras | 2015 | 1.084842 | 0.9635   |

1  
2  
3  
4  
5  
6  
7  
8  
9  
10  
11  
12  
13  
14  
15  
16  
17  
18  
19  
20  
21  
22  
23  
24  
25  
26  
27  
28  
29  
30  
31  
32  
33  
34  
35  
36  
37  
38  
39  
40  
41  
42  
43  
44  
45  
46

|          |      |          |          |
|----------|------|----------|----------|
| Honduras | 2016 | 1.097255 | 0.964191 |
| Honduras | 2017 | 1.113633 | 0.969835 |
| Honduras | 2018 | 1.133398 | 0.979179 |
| Honduras | 2019 | 1.150707 | 0.987235 |
| Hungary  | 1990 | 1.248905 | 0.783216 |
| Hungary  | 1991 | 1.273197 | 0.788897 |
| Hungary  | 1992 | 1.235009 | 0.764683 |
| Hungary  | 1993 | 1.231176 | 0.75623  |
| Hungary  | 1994 | 1.207315 | 0.733594 |
| Hungary  | 1995 | 1.224856 | 0.735564 |
| Hungary  | 1996 | 1.257931 | 0.743862 |
| Hungary  | 1997 | 1.308379 | 0.767016 |
| Hungary  | 1998 | 1.328475 | 0.772198 |
| Hungary  | 1999 | 1.338323 | 0.77329  |
| Hungary  | 2000 | 1.35984  | 0.776331 |
| Hungary  | 2001 | 1.359909 | 0.773614 |
| Hungary  | 2002 | 1.345923 | 0.763105 |
| Hungary  | 2003 | 1.355023 | 0.763996 |
| Hungary  | 2004 | 1.373922 | 0.770584 |
| Hungary  | 2005 | 1.367215 | 0.760508 |
| Hungary  | 2006 | 1.414381 | 0.777394 |
| Hungary  | 2007 | 1.476528 | 0.803333 |
| Hungary  | 2008 | 1.536635 | 0.823527 |
| Hungary  | 2009 | 1.559169 | 0.826695 |
| Hungary  | 2010 | 1.632679 | 0.854821 |

|         |      |          |          |
|---------|------|----------|----------|
| Hungary | 2011 | 1.687514 | 0.88035  |
| Hungary | 2012 | 1.701139 | 0.882161 |
| Hungary | 2013 | 1.757902 | 0.906339 |
| Hungary | 2014 | 1.755502 | 0.906485 |
| Hungary | 2015 | 1.78418  | 0.922637 |
| Hungary | 2016 | 1.735478 | 0.893355 |
| Hungary | 2017 | 1.75693  | 0.901822 |
| Hungary | 2018 | 1.744163 | 0.896852 |
| Hungary | 2019 | 1.776262 | 0.914186 |
| Iceland | 1990 | 0.893067 | 0.617346 |
| Iceland | 1991 | 0.898833 | 0.619624 |
| Iceland | 1992 | 0.904815 | 0.624484 |
| Iceland | 1993 | 0.906251 | 0.624472 |
| Iceland | 1994 | 0.900378 | 0.620242 |
| Iceland | 1995 | 0.886218 | 0.609419 |
| Iceland | 1996 | 0.865607 | 0.592359 |
| Iceland | 1997 | 0.86581  | 0.590292 |
| Iceland | 1998 | 0.87148  | 0.58898  |
| Iceland | 1999 | 0.88968  | 0.596646 |
| Iceland | 2000 | 0.939133 | 0.627518 |
| Iceland | 2001 | 0.946968 | 0.636139 |
| Iceland | 2002 | 0.918585 | 0.619865 |
| Iceland | 2003 | 0.932633 | 0.628488 |
| Iceland | 2004 | 0.943794 | 0.63412  |
| Iceland | 2005 | 0.920771 | 0.620702 |

1  
2  
3  
4  
5  
6  
7  
8  
9  
10  
11  
12  
13  
14  
15  
16  
17  
18  
19  
20  
21  
22  
23  
24  
25  
26  
27  
28  
29  
30  
31  
32  
33  
34  
35  
36  
37  
38  
39  
40  
41  
42  
43  
44  
45  
46

|         |      |          |          |
|---------|------|----------|----------|
| Iceland | 2006 | 0.875513 | 0.592684 |
| Iceland | 2007 | 0.828134 | 0.560027 |
| Iceland | 2008 | 0.813439 | 0.547711 |
| Iceland | 2009 | 0.797623 | 0.532781 |
| Iceland | 2010 | 0.792424 | 0.527124 |
| Iceland | 2011 | 0.797199 | 0.526861 |
| Iceland | 2012 | 0.781397 | 0.512562 |
| Iceland | 2013 | 0.816639 | 0.53432  |
| Iceland | 2014 | 0.891672 | 0.581795 |
| Iceland | 2015 | 0.868086 | 0.571245 |
| Iceland | 2016 | 0.841589 | 0.554825 |
| Iceland | 2017 | 0.799747 | 0.529264 |
| Iceland | 2018 | 0.791315 | 0.524633 |
| Iceland | 2019 | 0.793979 | 0.527376 |
| India   | 1990 | 0.67198  | 0.651392 |
| India   | 1991 | 0.664991 | 0.649046 |
| India   | 1992 | 0.677239 | 0.659893 |
| India   | 1993 | 0.668435 | 0.653609 |
| India   | 1994 | 0.664197 | 0.64799  |
| India   | 1995 | 0.665584 | 0.647018 |
| India   | 1996 | 0.664089 | 0.640755 |
| India   | 1997 | 0.665254 | 0.640588 |
| India   | 1998 | 0.672932 | 0.647828 |
| India   | 1999 | 0.667927 | 0.643606 |
| India   | 2000 | 0.650053 | 0.62195  |

|    |           |      |          |          |
|----|-----------|------|----------|----------|
| 1  |           |      |          |          |
| 2  |           |      |          |          |
| 3  |           |      |          |          |
| 4  |           |      |          |          |
| 5  | India     | 2001 | 0.648807 | 0.6203   |
| 6  | India     | 2002 | 0.645959 | 0.616526 |
| 7  | India     | 2003 | 0.627599 | 0.596667 |
| 8  | India     | 2004 | 0.61961  | 0.587071 |
| 9  | India     | 2005 | 0.617428 | 0.584254 |
| 10 | India     | 2006 | 0.621215 | 0.591136 |
| 11 | India     | 2007 | 0.62422  | 0.595923 |
| 12 | India     | 2008 | 0.614686 | 0.585389 |
| 13 | India     | 2009 | 0.615543 | 0.579393 |
| 14 | India     | 2010 | 0.627674 | 0.58403  |
| 15 | India     | 2011 | 0.631651 | 0.587956 |
| 16 | India     | 2012 | 0.643951 | 0.600207 |
| 17 | India     | 2013 | 0.668672 | 0.612078 |
| 18 | India     | 2014 | 0.697766 | 0.627543 |
| 19 | India     | 2015 | 0.726946 | 0.655171 |
| 20 | India     | 2016 | 0.727723 | 0.661042 |
| 21 | India     | 2017 | 0.728097 | 0.663525 |
| 22 | India     | 2018 | 0.72818  | 0.659649 |
| 23 | India     | 2019 | 0.732114 | 0.664084 |
| 24 | Indonesia | 1990 | 0.904475 | 0.805626 |
| 25 | Indonesia | 1991 | 0.89592  | 0.79993  |
| 26 | Indonesia | 1992 | 0.891139 | 0.796224 |
| 27 | Indonesia | 1993 | 0.896197 | 0.800503 |
| 28 | Indonesia | 1994 | 0.901232 | 0.804676 |
| 29 | Indonesia | 1995 | 0.910442 | 0.812309 |
| 30 |           |      |          |          |
| 31 |           |      |          |          |
| 32 |           |      |          |          |
| 33 |           |      |          |          |
| 34 |           |      |          |          |
| 35 |           |      |          |          |
| 36 |           |      |          |          |
| 37 |           |      |          |          |
| 38 |           |      |          |          |
| 39 |           |      |          |          |
| 40 |           |      |          |          |
| 41 |           |      |          |          |
| 42 |           |      |          |          |
| 43 |           |      |          |          |
| 44 |           |      |          |          |
| 45 |           |      |          |          |
| 46 |           |      |          |          |

|                            |      |          |          |
|----------------------------|------|----------|----------|
| Indonesia                  | 1996 | 0.920734 | 0.822294 |
| Indonesia                  | 1997 | 0.925581 | 0.826452 |
| Indonesia                  | 1998 | 0.926823 | 0.827526 |
| Indonesia                  | 1999 | 0.927296 | 0.82819  |
| Indonesia                  | 2000 | 0.921737 | 0.824503 |
| Indonesia                  | 2001 | 0.909081 | 0.815638 |
| Indonesia                  | 2002 | 0.901911 | 0.810925 |
| Indonesia                  | 2003 | 0.900123 | 0.810677 |
| Indonesia                  | 2004 | 0.895603 | 0.807667 |
| Indonesia                  | 2005 | 0.891928 | 0.804423 |
| Indonesia                  | 2006 | 0.887582 | 0.802247 |
| Indonesia                  | 2007 | 0.88547  | 0.801573 |
| Indonesia                  | 2008 | 0.871184 | 0.787266 |
| Indonesia                  | 2009 | 0.857157 | 0.773813 |
| Indonesia                  | 2010 | 0.84432  | 0.761141 |
| Indonesia                  | 2011 | 0.825542 | 0.744336 |
| Indonesia                  | 2012 | 0.794104 | 0.715721 |
| Indonesia                  | 2013 | 0.771454 | 0.694276 |
| Indonesia                  | 2014 | 0.746281 | 0.67051  |
| Indonesia                  | 2015 | 0.731324 | 0.656279 |
| Indonesia                  | 2016 | 0.726472 | 0.653465 |
| Indonesia                  | 2017 | 0.727428 | 0.654714 |
| Indonesia                  | 2018 | 0.726543 | 0.654163 |
| Indonesia                  | 2019 | 0.725323 | 0.653072 |
| Iran (Islamic Republic of) | 1990 | 0.846309 | 0.884767 |

|                            |      |          |          |
|----------------------------|------|----------|----------|
| Iran (Islamic Republic of) | 1991 | 0.850062 | 0.895933 |
| Iran (Islamic Republic of) | 1992 | 0.845513 | 0.897431 |
| Iran (Islamic Republic of) | 1993 | 0.850854 | 0.909371 |
| Iran (Islamic Republic of) | 1994 | 0.846549 | 0.911123 |
| Iran (Islamic Republic of) | 1995 | 0.850514 | 0.921504 |
| Iran (Islamic Republic of) | 1996 | 0.865414 | 0.943133 |
| Iran (Islamic Republic of) | 1997 | 0.868181 | 0.951728 |
| Iran (Islamic Republic of) | 1998 | 0.872144 | 0.960851 |
| Iran (Islamic Republic of) | 1999 | 0.866475 | 0.958325 |
| Iran (Islamic Republic of) | 2000 | 0.887477 | 0.985288 |
| Iran (Islamic Republic of) | 2001 | 0.899208 | 1.00184  |
| Iran (Islamic Republic of) | 2002 | 0.886266 | 0.98971  |
| Iran (Islamic Republic of) | 2003 | 0.872632 | 0.974236 |
| Iran (Islamic Republic of) | 2004 | 0.871049 | 0.970715 |
| Iran (Islamic Republic of) | 2005 | 0.871362 | 0.967471 |
| Iran (Islamic Republic of) | 2006 | 0.858624 | 0.948691 |
| Iran (Islamic Republic of) | 2007 | 0.840085 | 0.919136 |
| Iran (Islamic Republic of) | 2008 | 0.829588 | 0.900372 |
| Iran (Islamic Republic of) | 2009 | 0.824816 | 0.888598 |
| Iran (Islamic Republic of) | 2010 | 0.826351 | 0.879267 |
| Iran (Islamic Republic of) | 2011 | 0.825291 | 0.871341 |
| Iran (Islamic Republic of) | 2012 | 0.823102 | 0.865946 |
| Iran (Islamic Republic of) | 2013 | 0.839203 | 0.883214 |
| Iran (Islamic Republic of) | 2014 | 0.858072 | 0.903726 |
| Iran (Islamic Republic of) | 2015 | 0.87411  | 0.919495 |



|    |                            |      |          |          |
|----|----------------------------|------|----------|----------|
| 1  |                            |      |          |          |
| 2  |                            |      |          |          |
| 3  |                            |      |          |          |
| 4  |                            |      |          |          |
| 5  | Iran (Islamic Republic of) | 2016 | 0.89088  | 0.937536 |
| 6  | Iran (Islamic Republic of) | 2017 | 0.901889 | 0.949128 |
| 7  | Iran (Islamic Republic of) | 2018 | 0.906975 | 0.953392 |
| 8  | Iran (Islamic Republic of) | 2019 | 0.915692 | 0.961205 |
| 9  |                            |      |          |          |
| 10 | Iraq                       | 1990 | 1.038715 | 0.921613 |
| 11 | Iraq                       | 1991 | 1.028035 | 0.91066  |
| 12 | Iraq                       | 1992 | 1.015177 | 0.901312 |
| 13 | Iraq                       | 1993 | 0.996418 | 0.884872 |
| 14 | Iraq                       | 1994 | 0.978218 | 0.864977 |
| 15 | Iraq                       | 1995 | 0.970719 | 0.857555 |
| 16 | Iraq                       | 1996 | 0.96171  | 0.847265 |
| 17 | Iraq                       | 1997 | 0.947098 | 0.832703 |
| 18 | Iraq                       | 1998 | 0.932334 | 0.819284 |
| 19 | Iraq                       | 1999 | 0.923562 | 0.811365 |
| 20 | Iraq                       | 2000 | 0.916529 | 0.805188 |
| 21 | Iraq                       | 2001 | 0.912447 | 0.800956 |
| 22 | Iraq                       | 2002 | 0.91232  | 0.799917 |
| 23 | Iraq                       | 2003 | 0.912054 | 0.799067 |
| 24 | Iraq                       | 2004 | 0.919368 | 0.806158 |
| 25 | Iraq                       | 2005 | 0.923599 | 0.808822 |
| 26 | Iraq                       | 2006 | 0.932396 | 0.814381 |
| 27 | Iraq                       | 2007 | 0.932736 | 0.812761 |
| 28 | Iraq                       | 2008 | 0.928361 | 0.808737 |
| 29 | Iraq                       | 2009 | 0.91609  | 0.797203 |
| 30 | Iraq                       | 2010 | 0.898317 | 0.779174 |
| 31 |                            |      |          |          |
| 32 |                            |      |          |          |
| 33 |                            |      |          |          |
| 34 |                            |      |          |          |
| 35 |                            |      |          |          |
| 36 |                            |      |          |          |
| 37 |                            |      |          |          |
| 38 |                            |      |          |          |
| 39 |                            |      |          |          |
| 40 |                            |      |          |          |
| 41 |                            |      |          |          |
| 42 |                            |      |          |          |
| 43 |                            |      |          |          |
| 44 |                            |      |          |          |
| 45 |                            |      |          |          |
| 46 |                            |      |          |          |

|         |      |          |          |
|---------|------|----------|----------|
| Iraq    | 2011 | 0.886643 | 0.769248 |
| Iraq    | 2012 | 0.873397 | 0.75733  |
| Iraq    | 2013 | 0.859141 | 0.744408 |
| Iraq    | 2014 | 0.849341 | 0.734867 |
| Iraq    | 2015 | 0.848791 | 0.733316 |
| Iraq    | 2016 | 0.849734 | 0.733889 |
| Iraq    | 2017 | 0.850296 | 0.733783 |
| Iraq    | 2018 | 0.838897 | 0.725088 |
| Iraq    | 2019 | 0.823535 | 0.707666 |
| Ireland | 1990 | 0.990332 | 0.642532 |
| Ireland | 1991 | 1.01067  | 0.652745 |
| Ireland | 1992 | 1.005023 | 0.645801 |
| Ireland | 1993 | 0.997892 | 0.639265 |
| Ireland | 1994 | 1.016307 | 0.644885 |
| Ireland | 1995 | 1.014649 | 0.636152 |
| Ireland | 1996 | 1.000293 | 0.620096 |
| Ireland | 1997 | 1.020021 | 0.631417 |
| Ireland | 1998 | 1.031917 | 0.637105 |
| Ireland | 1999 | 1.024805 | 0.629057 |
| Ireland | 2000 | 1.008419 | 0.613226 |
| Ireland | 2001 | 1.019148 | 0.611967 |
| Ireland | 2002 | 1.021805 | 0.615345 |
| Ireland | 2003 | 1.021697 | 0.61487  |
| Ireland | 2004 | 1.005065 | 0.60004  |
| Ireland | 2005 | 1.045104 | 0.620705 |

1  
2  
3  
4  
5  
6  
7  
8  
9  
10  
11  
12  
13  
14  
15  
16  
17  
18  
19  
20  
21  
22  
23  
24  
25  
26  
27  
28  
29  
30  
31  
32  
33  
34  
35  
36  
37  
38  
39  
40  
41  
42  
43  
44  
45  
46

|         |      |          |          |
|---------|------|----------|----------|
| Ireland | 2006 | 1.067788 | 0.636154 |
| Ireland | 2007 | 1.052256 | 0.630424 |
| Ireland | 2008 | 1.038694 | 0.625566 |
| Ireland | 2009 | 1.017066 | 0.619329 |
| Ireland | 2010 | 1.018538 | 0.623428 |
| Ireland | 2011 | 1.012795 | 0.627264 |
| Ireland | 2012 | 0.975791 | 0.606707 |
| Ireland | 2013 | 0.943072 | 0.590724 |
| Ireland | 2014 | 0.941779 | 0.595064 |
| Ireland | 2015 | 0.952201 | 0.609346 |
| Ireland | 2016 | 0.942132 | 0.61169  |
| Ireland | 2017 | 0.933334 | 0.615757 |
| Ireland | 2018 | 0.93453  | 0.626241 |
| Ireland | 2019 | 0.920745 | 0.626484 |
| Israel  | 1990 | 0.94219  | 0.786904 |
| Israel  | 1991 | 0.919965 | 0.762573 |
| Israel  | 1992 | 0.917957 | 0.753597 |
| Israel  | 1993 | 0.919162 | 0.74611  |
| Israel  | 1994 | 0.919964 | 0.740401 |
| Israel  | 1995 | 0.89525  | 0.714392 |
| Israel  | 1996 | 0.885476 | 0.706356 |
| Israel  | 1997 | 0.869098 | 0.688093 |
| Israel  | 1998 | 0.857361 | 0.667378 |
| Israel  | 1999 | 0.855316 | 0.658138 |
| Israel  | 2000 | 0.841052 | 0.644188 |

|    |        |      |          |          |
|----|--------|------|----------|----------|
| 1  |        |      |          |          |
| 2  |        |      |          |          |
| 3  |        |      |          |          |
| 4  |        |      |          |          |
| 5  | Israel | 2001 | 0.848966 | 0.6474   |
| 6  | Israel | 2002 | 0.849254 | 0.644365 |
| 7  | Israel | 2003 | 0.849257 | 0.639475 |
| 8  | Israel | 2004 | 0.858922 | 0.643102 |
| 9  | Israel | 2005 | 0.861348 | 0.642839 |
| 10 | Israel | 2006 | 0.870257 | 0.648499 |
| 11 | Israel | 2007 | 0.877613 | 0.649739 |
| 12 | Israel | 2008 | 0.887024 | 0.649546 |
| 13 | Israel | 2009 | 0.903354 | 0.655117 |
| 14 | Israel | 2010 | 0.894466 | 0.645255 |
| 15 | Israel | 2011 | 0.916316 | 0.659221 |
| 16 | Israel | 2012 | 0.908112 | 0.649691 |
| 17 | Israel | 2013 | 0.919164 | 0.653967 |
| 18 | Israel | 2014 | 0.917547 | 0.649284 |
| 19 | Israel | 2015 | 0.902198 | 0.636174 |
| 20 | Israel | 2016 | 0.931438 | 0.657062 |
| 21 | Israel | 2017 | 0.929475 | 0.656012 |
| 22 | Israel | 2018 | 0.923335 | 0.653248 |
| 23 | Israel | 2019 | 0.923192 | 0.655589 |
| 24 | Italy  | 1990 | 1.090376 | 0.643927 |
| 25 | Italy  | 1991 | 1.081423 | 0.637552 |
| 26 | Italy  | 1992 | 1.078447 | 0.634752 |
| 27 | Italy  | 1993 | 1.088728 | 0.638461 |
| 28 | Italy  | 1994 | 1.092486 | 0.639173 |
| 29 | Italy  | 1995 | 1.104435 | 0.642915 |
| 30 |        |      |          |          |
| 31 |        |      |          |          |
| 32 |        |      |          |          |
| 33 |        |      |          |          |
| 34 |        |      |          |          |
| 35 |        |      |          |          |
| 36 |        |      |          |          |
| 37 |        |      |          |          |
| 38 |        |      |          |          |
| 39 |        |      |          |          |
| 40 |        |      |          |          |
| 41 |        |      |          |          |
| 42 |        |      |          |          |
| 43 |        |      |          |          |
| 44 |        |      |          |          |
| 45 |        |      |          |          |
| 46 |        |      |          |          |

|         |      |          |          |
|---------|------|----------|----------|
| Italy   | 1996 | 1.115154 | 0.644873 |
| Italy   | 1997 | 1.121742 | 0.644068 |
| Italy   | 1998 | 1.130953 | 0.645348 |
| Italy   | 1999 | 1.141682 | 0.646889 |
| Italy   | 2000 | 1.166232 | 0.654341 |
| Italy   | 2001 | 1.182466 | 0.657137 |
| Italy   | 2002 | 1.207321 | 0.66463  |
| Italy   | 2003 | 1.209099 | 0.6605   |
| Italy   | 2004 | 1.216337 | 0.660522 |
| Italy   | 2005 | 1.211844 | 0.651899 |
| Italy   | 2006 | 1.208596 | 0.644847 |
| Italy   | 2007 | 1.210034 | 0.642825 |
| Italy   | 2008 | 1.223902 | 0.648972 |
| Italy   | 2009 | 1.227047 | 0.651423 |
| Italy   | 2010 | 1.241487 | 0.658229 |
| Italy   | 2011 | 1.256087 | 0.66503  |
| Italy   | 2012 | 1.269111 | 0.672045 |
| Italy   | 2013 | 1.262556 | 0.669897 |
| Italy   | 2014 | 1.259651 | 0.670649 |
| Italy   | 2015 | 1.248791 | 0.665998 |
| Italy   | 2016 | 1.241213 | 0.662825 |
| Italy   | 2017 | 1.220767 | 0.657356 |
| Italy   | 2018 | 1.222834 | 0.665099 |
| Italy   | 2019 | 1.210609 | 0.666333 |
| Jamaica | 1990 | 0.636078 | 0.518682 |

|         |      |          |          |
|---------|------|----------|----------|
| Jamaica | 1991 | 0.692646 | 0.56671  |
| Jamaica | 1992 | 0.687608 | 0.56459  |
| Jamaica | 1993 | 0.690036 | 0.566605 |
| Jamaica | 1994 | 0.708948 | 0.583474 |
| Jamaica | 1995 | 0.731778 | 0.602656 |
| Jamaica | 1996 | 0.755209 | 0.621615 |
| Jamaica | 1997 | 0.780986 | 0.641921 |
| Jamaica | 1998 | 0.780952 | 0.642028 |
| Jamaica | 1999 | 0.813121 | 0.665991 |
| Jamaica | 2000 | 0.899106 | 0.732146 |
| Jamaica | 2001 | 0.899379 | 0.732191 |
| Jamaica | 2002 | 0.891943 | 0.735452 |
| Jamaica | 2003 | 0.881381 | 0.726775 |
| Jamaica | 2004 | 0.900935 | 0.744511 |
| Jamaica | 2005 | 0.913895 | 0.76107  |
| Jamaica | 2006 | 0.88166  | 0.736568 |
| Jamaica | 2007 | 0.74946  | 0.632214 |
| Jamaica | 2008 | 0.637378 | 0.539676 |
| Jamaica | 2009 | 0.588224 | 0.494132 |
| Jamaica | 2010 | 0.715381 | 0.601316 |
| Jamaica | 2011 | 0.647498 | 0.544749 |
| Jamaica | 2012 | 0.7813   | 0.660719 |
| Jamaica | 2013 | 0.79124  | 0.671617 |
| Jamaica | 2014 | 0.762489 | 0.646836 |
| Jamaica | 2015 | 0.756701 | 0.64138  |

|         |      |          |          |
|---------|------|----------|----------|
| Jamaica | 2016 | 0.739837 | 0.632018 |
| Jamaica | 2017 | 0.737952 | 0.631909 |
| Jamaica | 2018 | 0.739624 | 0.63439  |
| Jamaica | 2019 | 0.76193  | 0.654431 |
| Japan   | 1990 | 1.071062 | 0.680444 |
| Japan   | 1991 | 1.070475 | 0.67287  |
| Japan   | 1992 | 1.076246 | 0.669168 |
| Japan   | 1993 | 1.085941 | 0.668386 |
| Japan   | 1994 | 1.096482 | 0.668363 |
| Japan   | 1995 | 1.098415 | 0.665185 |
| Japan   | 1996 | 1.116045 | 0.671318 |
| Japan   | 1997 | 1.116951 | 0.666228 |
| Japan   | 1998 | 1.100232 | 0.650244 |
| Japan   | 1999 | 1.085048 | 0.634718 |
| Japan   | 2000 | 1.077853 | 0.623941 |
| Japan   | 2001 | 1.078097 | 0.617512 |
| Japan   | 2002 | 1.081282 | 0.611892 |
| Japan   | 2003 | 1.076595 | 0.602602 |
| Japan   | 2004 | 1.086712 | 0.601979 |
| Japan   | 2005 | 1.079257 | 0.590908 |
| Japan   | 2006 | 1.089796 | 0.590608 |
| Japan   | 2007 | 1.081004 | 0.581309 |
| Japan   | 2008 | 1.068997 | 0.570964 |
| Japan   | 2009 | 1.047886 | 0.557176 |
| Japan   | 2010 | 1.039781 | 0.550218 |

|    |        |      |          |          |
|----|--------|------|----------|----------|
| 1  |        |      |          |          |
| 2  |        |      |          |          |
| 3  |        |      |          |          |
| 4  |        |      |          |          |
| 5  | Japan  | 2011 | 1.059746 | 0.558397 |
| 6  | Japan  | 2012 | 1.071226 | 0.562936 |
| 7  | Japan  | 2013 | 1.081946 | 0.568402 |
| 8  | Japan  | 2014 | 1.09023  | 0.573894 |
| 9  | Japan  | 2015 | 1.09495  | 0.573838 |
| 10 | Japan  | 2016 | 1.105279 | 0.578573 |
| 11 | Japan  | 2017 | 1.106388 | 0.579657 |
| 12 | Japan  | 2018 | 1.120202 | 0.588741 |
| 13 | Japan  | 2019 | 1.123565 | 0.592949 |
| 14 | Jordan | 1990 | 1.243774 | 1.278353 |
| 15 | Jordan | 1991 | 1.271979 | 1.323684 |
| 16 | Jordan | 1992 | 1.212918 | 1.282366 |
| 17 | Jordan | 1993 | 1.233106 | 1.313997 |
| 18 | Jordan | 1994 | 1.211054 | 1.303852 |
| 19 | Jordan | 1995 | 1.231809 | 1.332617 |
| 20 | Jordan | 1996 | 1.284041 | 1.392659 |
| 21 | Jordan | 1997 | 1.287126 | 1.406764 |
| 22 | Jordan | 1998 | 1.308754 | 1.439609 |
| 23 | Jordan | 1999 | 1.333204 | 1.476799 |
| 24 | Jordan | 2000 | 1.358915 | 1.522114 |
| 25 | Jordan | 2001 | 1.404458 | 1.596437 |
| 26 | Jordan | 2002 | 1.427616 | 1.644192 |
| 27 | Jordan | 2003 | 1.421953 | 1.638204 |
| 28 | Jordan | 2004 | 1.479769 | 1.729284 |
| 29 | Jordan | 2005 | 1.497596 | 1.826894 |
| 30 |        |      |          |          |
| 31 |        |      |          |          |
| 32 |        |      |          |          |
| 33 |        |      |          |          |
| 34 |        |      |          |          |
| 35 |        |      |          |          |
| 36 |        |      |          |          |
| 37 |        |      |          |          |
| 38 |        |      |          |          |
| 39 |        |      |          |          |
| 40 |        |      |          |          |
| 41 |        |      |          |          |
| 42 |        |      |          |          |
| 43 |        |      |          |          |
| 44 |        |      |          |          |
| 45 |        |      |          |          |
| 46 |        |      |          |          |



1  
2  
3  
4  
5  
6  
7  
8  
9  
10  
11  
12  
13  
14  
15  
16  
17  
18  
19  
20  
21  
22  
23  
24  
25  
26  
27  
28  
29  
30  
31  
32  
33  
34  
35  
36  
37  
38  
39  
40  
41  
42  
43  
44  
45  
46

|            |      |          |          |
|------------|------|----------|----------|
| Jordan     | 2006 | 1.443136 | 1.794166 |
| Jordan     | 2007 | 1.234151 | 1.483146 |
| Jordan     | 2008 | 1.106929 | 1.285829 |
| Jordan     | 2009 | 1.019138 | 1.165059 |
| Jordan     | 2010 | 0.948687 | 1.067889 |
| Jordan     | 2011 | 0.940285 | 1.066222 |
| Jordan     | 2012 | 0.951527 | 1.102951 |
| Jordan     | 2013 | 0.966647 | 1.159036 |
| Jordan     | 2014 | 0.973437 | 1.182669 |
| Jordan     | 2015 | 0.936691 | 1.117044 |
| Jordan     | 2016 | 0.952236 | 1.138096 |
| Jordan     | 2017 | 0.970198 | 1.166857 |
| Jordan     | 2018 | 0.973143 | 1.154724 |
| Jordan     | 2019 | 0.982615 | 1.164998 |
| Kazakhstan | 1990 | 0.999933 | 0.671258 |
| Kazakhstan | 1991 | 0.981541 | 0.660741 |
| Kazakhstan | 1992 | 0.97938  | 0.666346 |
| Kazakhstan | 1993 | 0.981365 | 0.670065 |
| Kazakhstan | 1994 | 0.974429 | 0.669119 |
| Kazakhstan | 1995 | 0.950401 | 0.661327 |
| Kazakhstan | 1996 | 0.930785 | 0.656143 |
| Kazakhstan | 1997 | 0.943874 | 0.664252 |
| Kazakhstan | 1998 | 0.935451 | 0.657537 |
| Kazakhstan | 1999 | 0.926939 | 0.650073 |
| Kazakhstan | 2000 | 0.886229 | 0.629965 |

|    |            |      |          |          |
|----|------------|------|----------|----------|
| 1  |            |      |          |          |
| 2  |            |      |          |          |
| 3  |            |      |          |          |
| 4  |            |      |          |          |
| 5  | Kazakhstan | 2001 | 0.881548 | 0.629943 |
| 6  | Kazakhstan | 2002 | 0.869182 | 0.618695 |
| 7  | Kazakhstan | 2003 | 0.840973 | 0.59763  |
| 8  | Kazakhstan | 2004 | 0.821565 | 0.586984 |
| 9  | Kazakhstan | 2005 | 0.821461 | 0.589292 |
| 10 | Kazakhstan | 2006 | 0.811659 | 0.58123  |
| 11 | Kazakhstan | 2007 | 0.818429 | 0.578066 |
| 12 | Kazakhstan | 2008 | 0.839521 | 0.583216 |
| 13 | Kazakhstan | 2009 | 0.85267  | 0.585487 |
| 14 | Kazakhstan | 2010 | 0.851782 | 0.57773  |
| 15 | Kazakhstan | 2011 | 0.848325 | 0.564973 |
| 16 | Kazakhstan | 2012 | 0.849505 | 0.555703 |
| 17 | Kazakhstan | 2013 | 0.851565 | 0.5504   |
| 18 | Kazakhstan | 2014 | 0.822531 | 0.523314 |
| 19 | Kazakhstan | 2015 | 0.844378 | 0.529259 |
| 20 | Kazakhstan | 2016 | 0.839327 | 0.522411 |
| 21 | Kazakhstan | 2017 | 0.844597 | 0.520727 |
| 22 | Kazakhstan | 2018 | 0.828471 | 0.515002 |
| 23 | Kazakhstan | 2019 | 0.852281 | 0.536614 |
| 24 | Kenya      | 1990 | 0.707017 | 0.669507 |
| 25 | Kenya      | 1991 | 0.695049 | 0.65375  |
| 26 | Kenya      | 1992 | 0.684015 | 0.637947 |
| 27 | Kenya      | 1993 | 0.671695 | 0.620169 |
| 28 | Kenya      | 1994 | 0.665955 | 0.607842 |
| 29 | Kenya      | 1995 | 0.656889 | 0.59345  |
| 30 |            |      |          |          |
| 31 |            |      |          |          |
| 32 |            |      |          |          |
| 33 |            |      |          |          |
| 34 |            |      |          |          |
| 35 |            |      |          |          |
| 36 |            |      |          |          |
| 37 |            |      |          |          |
| 38 |            |      |          |          |
| 39 |            |      |          |          |
| 40 |            |      |          |          |
| 41 |            |      |          |          |
| 42 |            |      |          |          |
| 43 |            |      |          |          |
| 44 |            |      |          |          |
| 45 |            |      |          |          |
| 46 |            |      |          |          |

|          |      |          |          |
|----------|------|----------|----------|
| Kenya    | 1996 | 0.646414 | 0.578509 |
| Kenya    | 1997 | 0.645358 | 0.571636 |
| Kenya    | 1998 | 0.63756  | 0.559602 |
| Kenya    | 1999 | 0.632168 | 0.549598 |
| Kenya    | 2000 | 0.629263 | 0.542961 |
| Kenya    | 2001 | 0.63245  | 0.542569 |
| Kenya    | 2002 | 0.638176 | 0.545642 |
| Kenya    | 2003 | 0.642005 | 0.548332 |
| Kenya    | 2004 | 0.640791 | 0.547412 |
| Kenya    | 2005 | 0.640905 | 0.546741 |
| Kenya    | 2006 | 0.638279 | 0.544025 |
| Kenya    | 2007 | 0.639843 | 0.544383 |
| Kenya    | 2008 | 0.641193 | 0.544797 |
| Kenya    | 2009 | 0.64706  | 0.549628 |
| Kenya    | 2010 | 0.662556 | 0.562322 |
| Kenya    | 2011 | 0.682387 | 0.578683 |
| Kenya    | 2012 | 0.703185 | 0.596299 |
| Kenya    | 2013 | 0.725656 | 0.615121 |
| Kenya    | 2014 | 0.743482 | 0.63115  |
| Kenya    | 2015 | 0.759326 | 0.646749 |
| Kenya    | 2016 | 0.766795 | 0.655746 |
| Kenya    | 2017 | 0.775255 | 0.665895 |
| Kenya    | 2018 | 0.781453 | 0.675112 |
| Kenya    | 2019 | 0.784901 | 0.682011 |
| Kiribati | 1990 | 1.4921   | 1.196769 |

|          |      |          |          |
|----------|------|----------|----------|
| Kiribati | 1991 | 1.456679 | 1.172151 |
| Kiribati | 1992 | 1.426989 | 1.152817 |
| Kiribati | 1993 | 1.399922 | 1.134295 |
| Kiribati | 1994 | 1.379383 | 1.119111 |
| Kiribati | 1995 | 1.357045 | 1.1003   |
| Kiribati | 1996 | 1.342688 | 1.088594 |
| Kiribati | 1997 | 1.337935 | 1.081264 |
| Kiribati | 1998 | 1.335628 | 1.075184 |
| Kiribati | 1999 | 1.338924 | 1.073275 |
| Kiribati | 2000 | 1.334341 | 1.064826 |
| Kiribati | 2001 | 1.330727 | 1.059429 |
| Kiribati | 2002 | 1.334753 | 1.061153 |
| Kiribati | 2003 | 1.344028 | 1.068185 |
| Kiribati | 2004 | 1.360788 | 1.08068  |
| Kiribati | 2005 | 1.358904 | 1.078589 |
| Kiribati | 2006 | 1.337353 | 1.06056  |
| Kiribati | 2007 | 1.308545 | 1.039539 |
| Kiribati | 2008 | 1.284763 | 1.019264 |
| Kiribati | 2009 | 1.261421 | 0.998717 |
| Kiribati | 2010 | 1.244095 | 0.982611 |
| Kiribati | 2011 | 1.224451 | 0.964273 |
| Kiribati | 2012 | 1.203869 | 0.946504 |
| Kiribati | 2013 | 1.187289 | 0.931639 |
| Kiribati | 2014 | 1.173134 | 0.918956 |
| Kiribati | 2015 | 1.174871 | 0.919107 |

1  
2  
3  
4  
5  
6  
7  
8  
9  
10  
11  
12  
13  
14  
15  
16  
17  
18  
19  
20  
21  
22  
23  
24  
25  
26  
27  
28  
29  
30  
31  
32  
33  
34  
35  
36  
37  
38  
39  
40  
41  
42  
43  
44  
45  
46

|          |      |          |          |
|----------|------|----------|----------|
| Kiribati | 2016 | 1.184607 | 0.925399 |
| Kiribati | 2017 | 1.193378 | 0.931678 |
| Kiribati | 2018 | 1.19579  | 0.933418 |
| Kiribati | 2019 | 1.197517 | 0.934093 |
| Kuwait   | 1990 | 0.906022 | 1.255995 |
| Kuwait   | 1991 | 0.892059 | 1.282196 |
| Kuwait   | 1992 | 0.885625 | 1.259416 |
| Kuwait   | 1993 | 0.768031 | 1.079664 |
| Kuwait   | 1994 | 0.721014 | 1.029666 |
| Kuwait   | 1995 | 0.703499 | 1.018502 |
| Kuwait   | 1996 | 0.72527  | 1.063488 |
| Kuwait   | 1997 | 0.668915 | 1.014207 |
| Kuwait   | 1998 | 0.704428 | 1.07427  |
| Kuwait   | 1999 | 0.635082 | 0.968802 |
| Kuwait   | 2000 | 0.636471 | 0.973544 |
| Kuwait   | 2001 | 0.77434  | 1.188986 |
| Kuwait   | 2002 | 0.694942 | 1.096564 |
| Kuwait   | 2003 | 0.673842 | 1.081392 |
| Kuwait   | 2004 | 0.653702 | 1.044354 |
| Kuwait   | 2005 | 0.61209  | 0.973403 |
| Kuwait   | 2006 | 0.597222 | 0.957241 |
| Kuwait   | 2007 | 0.649274 | 1.040845 |
| Kuwait   | 2008 | 0.671105 | 1.096313 |
| Kuwait   | 2009 | 0.757462 | 1.216108 |
| Kuwait   | 2010 | 0.839781 | 1.32464  |

|            |      |          |          |
|------------|------|----------|----------|
| Kuwait     | 2011 | 0.862705 | 1.35794  |
| Kuwait     | 2012 | 0.814298 | 1.283671 |
| Kuwait     | 2013 | 0.814568 | 1.285124 |
| Kuwait     | 2014 | 0.84126  | 1.300564 |
| Kuwait     | 2015 | 0.767129 | 1.168468 |
| Kuwait     | 2016 | 0.739668 | 1.118587 |
| Kuwait     | 2017 | 0.726698 | 1.081906 |
| Kuwait     | 2018 | 0.713715 | 1.056145 |
| Kuwait     | 2019 | 0.723676 | 1.037296 |
| Kyrgyzstan | 1990 | 0.891951 | 0.672838 |
| Kyrgyzstan | 1991 | 0.908612 | 0.691176 |
| Kyrgyzstan | 1992 | 0.898784 | 0.681623 |
| Kyrgyzstan | 1993 | 0.850417 | 0.650437 |
| Kyrgyzstan | 1994 | 0.82783  | 0.639884 |
| Kyrgyzstan | 1995 | 0.837243 | 0.653969 |
| Kyrgyzstan | 1996 | 0.834809 | 0.650548 |
| Kyrgyzstan | 1997 | 0.819205 | 0.637971 |
| Kyrgyzstan | 1998 | 0.831842 | 0.648076 |
| Kyrgyzstan | 1999 | 0.840267 | 0.664432 |
| Kyrgyzstan | 2000 | 0.844168 | 0.661815 |
| Kyrgyzstan | 2001 | 0.830856 | 0.658922 |
| Kyrgyzstan | 2002 | 0.828249 | 0.667975 |
| Kyrgyzstan | 2003 | 0.824127 | 0.67254  |
| Kyrgyzstan | 2004 | 0.810225 | 0.669459 |
| Kyrgyzstan | 2005 | 0.806345 | 0.668711 |

|    |                                  |      |          |          |
|----|----------------------------------|------|----------|----------|
| 1  |                                  |      |          |          |
| 2  |                                  |      |          |          |
| 3  |                                  |      |          |          |
| 4  |                                  |      |          |          |
| 5  | Kyrgyzstan                       | 2006 | 0.770748 | 0.64556  |
| 6  | Kyrgyzstan                       | 2007 | 0.755731 | 0.63405  |
| 7  | Kyrgyzstan                       | 2008 | 0.784272 | 0.65742  |
| 8  | Kyrgyzstan                       | 2009 | 0.81073  | 0.67425  |
| 9  | Kyrgyzstan                       | 2010 | 0.817755 | 0.685054 |
| 10 | Kyrgyzstan                       | 2011 | 0.840219 | 0.711408 |
| 11 | Kyrgyzstan                       | 2012 | 0.841235 | 0.716805 |
| 12 | Kyrgyzstan                       | 2013 | 0.84349  | 0.720402 |
| 13 | Kyrgyzstan                       | 2014 | 0.842241 | 0.705299 |
| 14 | Kyrgyzstan                       | 2015 | 0.860066 | 0.70151  |
| 15 | Kyrgyzstan                       | 2016 | 0.874609 | 0.704633 |
| 16 | Kyrgyzstan                       | 2017 | 0.849871 | 0.684358 |
| 17 | Kyrgyzstan                       | 2018 | 0.841746 | 0.687493 |
| 18 | Kyrgyzstan                       | 2019 | 0.83568  | 0.684807 |
| 19 | Lao People's Democratic Republic | 1990 | 1.080257 | 0.904518 |
| 20 | Lao People's Democratic Republic | 1991 | 1.079338 | 0.906014 |
| 21 | Lao People's Democratic Republic | 1992 | 1.08287  | 0.911731 |
| 22 | Lao People's Democratic Republic | 1993 | 1.084715 | 0.916095 |
| 23 | Lao People's Democratic Republic | 1994 | 1.087379 | 0.920926 |
| 24 | Lao People's Democratic Republic | 1995 | 1.087375 | 0.922831 |
| 25 | Lao People's Democratic Republic | 1996 | 1.079552 | 0.918976 |
| 26 | Lao People's Democratic Republic | 1997 | 1.072371 | 0.91556  |
| 27 | Lao People's Democratic Republic | 1998 | 1.058718 | 0.906658 |
| 28 | Lao People's Democratic Republic | 1999 | 1.052176 | 0.902857 |
| 29 | Lao People's Democratic Republic | 2000 | 1.036378 | 0.890862 |
| 30 |                                  |      |          |          |
| 31 |                                  |      |          |          |
| 32 |                                  |      |          |          |
| 33 |                                  |      |          |          |
| 34 |                                  |      |          |          |
| 35 |                                  |      |          |          |
| 36 |                                  |      |          |          |
| 37 |                                  |      |          |          |
| 38 |                                  |      |          |          |
| 39 |                                  |      |          |          |
| 40 |                                  |      |          |          |
| 41 |                                  |      |          |          |
| 42 |                                  |      |          |          |
| 43 |                                  |      |          |          |
| 44 |                                  |      |          |          |
| 45 |                                  |      |          |          |
| 46 |                                  |      |          |          |

|                                  |      |          |          |
|----------------------------------|------|----------|----------|
| Lao People's Democratic Republic | 2001 | 1.02433  | 0.883273 |
| Lao People's Democratic Republic | 2002 | 1.015382 | 0.87784  |
| Lao People's Democratic Republic | 2003 | 1.002093 | 0.869322 |
| Lao People's Democratic Republic | 2004 | 0.99141  | 0.862162 |
| Lao People's Democratic Republic | 2005 | 0.983924 | 0.856121 |
| Lao People's Democratic Republic | 2006 | 0.974171 | 0.850443 |
| Lao People's Democratic Republic | 2007 | 0.969745 | 0.848823 |
| Lao People's Democratic Republic | 2008 | 0.968779 | 0.849477 |
| Lao People's Democratic Republic | 2009 | 0.964921 | 0.846846 |
| Lao People's Democratic Republic | 2010 | 0.962207 | 0.843804 |
| Lao People's Democratic Republic | 2011 | 0.957551 | 0.841215 |
| Lao People's Democratic Republic | 2012 | 0.951021 | 0.838007 |
| Lao People's Democratic Republic | 2013 | 0.947474 | 0.837311 |
| Lao People's Democratic Republic | 2014 | 0.942958 | 0.835606 |
| Lao People's Democratic Republic | 2015 | 0.939503 | 0.833335 |
| Lao People's Democratic Republic | 2016 | 0.936031 | 0.833099 |
| Lao People's Democratic Republic | 2017 | 0.933775 | 0.833237 |
| Lao People's Democratic Republic | 2018 | 0.929921 | 0.831474 |
| Lao People's Democratic Republic | 2019 | 0.927608 | 0.831059 |
| Latvia                           | 1990 | 1.205006 | 0.533461 |
| Latvia                           | 1991 | 1.183017 | 0.522451 |
| Latvia                           | 1992 | 1.1596   | 0.513471 |
| Latvia                           | 1993 | 1.091711 | 0.49012  |
| Latvia                           | 1994 | 1.035137 | 0.470417 |
| Latvia                           | 1995 | 1.061499 | 0.481214 |



|         |      |          |          |
|---------|------|----------|----------|
| Latvia  | 1996 | 1.062243 | 0.487466 |
| Latvia  | 1997 | 1.055513 | 0.488382 |
| Latvia  | 1998 | 1.044571 | 0.489392 |
| Latvia  | 1999 | 1.049745 | 0.491657 |
| Latvia  | 2000 | 1.060367 | 0.490885 |
| Latvia  | 2001 | 1.058915 | 0.492391 |
| Latvia  | 2002 | 1.072686 | 0.496717 |
| Latvia  | 2003 | 1.191884 | 0.544692 |
| Latvia  | 2004 | 1.183538 | 0.544267 |
| Latvia  | 2005 | 1.135283 | 0.525288 |
| Latvia  | 2006 | 1.180254 | 0.548254 |
| Latvia  | 2007 | 1.191916 | 0.549398 |
| Latvia  | 2008 | 1.338475 | 0.604078 |
| Latvia  | 2009 | 1.473186 | 0.665503 |
| Latvia  | 2010 | 1.605934 | 0.719695 |
| Latvia  | 2011 | 1.734377 | 0.76653  |
| Latvia  | 2012 | 1.736977 | 0.761187 |
| Latvia  | 2013 | 1.795712 | 0.787659 |
| Latvia  | 2014 | 1.727391 | 0.755626 |
| Latvia  | 2015 | 1.815508 | 0.792721 |
| Latvia  | 2016 | 1.870149 | 0.814017 |
| Latvia  | 2017 | 1.84377  | 0.808288 |
| Latvia  | 2018 | 1.800032 | 0.794765 |
| Latvia  | 2019 | 1.764838 | 0.785235 |
| Lebanon | 1990 | 1.071467 | 0.981764 |

|         |      |          |          |
|---------|------|----------|----------|
| Lebanon | 1991 | 1.096284 | 1.005245 |
| Lebanon | 1992 | 1.107116 | 1.018167 |
| Lebanon | 1993 | 1.116366 | 1.030655 |
| Lebanon | 1994 | 1.123867 | 1.0433   |
| Lebanon | 1995 | 1.145438 | 1.068906 |
| Lebanon | 1996 | 1.152793 | 1.082827 |
| Lebanon | 1997 | 1.150313 | 1.087767 |
| Lebanon | 1998 | 1.160116 | 1.103824 |
| Lebanon | 1999 | 1.142017 | 1.095643 |
| Lebanon | 2000 | 1.136071 | 1.09651  |
| Lebanon | 2001 | 1.119939 | 1.087568 |
| Lebanon | 2002 | 1.108308 | 1.081466 |
| Lebanon | 2003 | 1.095733 | 1.073018 |
| Lebanon | 2004 | 1.071111 | 1.051902 |
| Lebanon | 2005 | 1.050357 | 1.031778 |
| Lebanon | 2006 | 1.030823 | 1.01005  |
| Lebanon | 2007 | 1.013675 | 0.987874 |
| Lebanon | 2008 | 1.001423 | 0.968311 |
| Lebanon | 2009 | 1.001269 | 0.95813  |
| Lebanon | 2010 | 1.011659 | 0.956166 |
| Lebanon | 2011 | 1.014475 | 0.945418 |
| Lebanon | 2012 | 1.01685  | 0.933202 |
| Lebanon | 2013 | 1.030695 | 0.93028  |
| Lebanon | 2014 | 1.053575 | 0.933731 |
| Lebanon | 2015 | 1.083446 | 0.942194 |

|         |      |          |          |
|---------|------|----------|----------|
| Lebanon | 2016 | 1.11331  | 0.94979  |
| Lebanon | 2017 | 1.146106 | 0.959078 |
| Lebanon | 2018 | 1.180669 | 0.969818 |
| Lebanon | 2019 | 1.214408 | 0.980276 |
| Lesotho | 1990 | 0.547406 | 0.365938 |
| Lesotho | 1991 | 0.542313 | 0.361697 |
| Lesotho | 1992 | 0.533141 | 0.355213 |
| Lesotho | 1993 | 0.52431  | 0.348481 |
| Lesotho | 1994 | 0.507527 | 0.337316 |
| Lesotho | 1995 | 0.487595 | 0.323129 |
| Lesotho | 1996 | 0.460489 | 0.303582 |
| Lesotho | 1997 | 0.433845 | 0.283866 |
| Lesotho | 1998 | 0.4568   | 0.296374 |
| Lesotho | 1999 | 0.483221 | 0.311493 |
| Lesotho | 2000 | 0.541543 | 0.347625 |
| Lesotho | 2001 | 0.554774 | 0.355842 |
| Lesotho | 2002 | 0.580648 | 0.372819 |
| Lesotho | 2003 | 0.628877 | 0.403491 |
| Lesotho | 2004 | 0.639428 | 0.412443 |
| Lesotho | 2005 | 0.656144 | 0.4243   |
| Lesotho | 2006 | 0.657785 | 0.427168 |
| Lesotho | 2007 | 0.674236 | 0.438252 |
| Lesotho | 2008 | 0.701223 | 0.456121 |
| Lesotho | 2009 | 0.707365 | 0.462249 |
| Lesotho | 2010 | 0.71764  | 0.471142 |

|    |         |      |          |          |
|----|---------|------|----------|----------|
| 1  |         |      |          |          |
| 2  |         |      |          |          |
| 3  |         |      |          |          |
| 4  |         |      |          |          |
| 5  | Lesotho | 2011 | 0.721541 | 0.476297 |
| 6  | Lesotho | 2012 | 0.738423 | 0.489759 |
| 7  | Lesotho | 2013 | 0.742987 | 0.495743 |
| 8  | Lesotho | 2014 | 0.740565 | 0.497532 |
| 9  | Lesotho | 2015 | 0.735094 | 0.496563 |
| 10 | Lesotho | 2016 | 0.722892 | 0.490841 |
| 11 | Lesotho | 2017 | 0.711107 | 0.4857   |
| 12 | Lesotho | 2018 | 0.705235 | 0.48378  |
| 13 | Lesotho | 2019 | 0.705917 | 0.485671 |
| 14 | Liberia | 1990 | 0.9085   | 0.996005 |
| 15 | Liberia | 1991 | 0.911296 | 0.998861 |
| 16 | Liberia | 1992 | 0.925106 | 1.011605 |
| 17 | Liberia | 1993 | 0.924282 | 1.008222 |
| 18 | Liberia | 1994 | 0.917343 | 0.998056 |
| 19 | Liberia | 1995 | 0.913325 | 0.981736 |
| 20 | Liberia | 1996 | 0.878938 | 0.937608 |
| 21 | Liberia | 1997 | 0.869847 | 0.918023 |
| 22 | Liberia | 1998 | 0.850108 | 0.894908 |
| 23 | Liberia | 1999 | 0.838556 | 0.881561 |
| 24 | Liberia | 2000 | 0.849539 | 0.884162 |
| 25 | Liberia | 2001 | 0.86329  | 0.889863 |
| 26 | Liberia | 2002 | 0.885972 | 0.907093 |
| 27 | Liberia | 2003 | 0.88833  | 0.908553 |
| 28 | Liberia | 2004 | 0.899159 | 0.919208 |
| 29 | Liberia | 2005 | 0.912469 | 0.924308 |
| 30 |         |      |          |          |
| 31 |         |      |          |          |
| 32 |         |      |          |          |
| 33 |         |      |          |          |
| 34 |         |      |          |          |
| 35 |         |      |          |          |
| 36 |         |      |          |          |
| 37 |         |      |          |          |
| 38 |         |      |          |          |
| 39 |         |      |          |          |
| 40 |         |      |          |          |
| 41 |         |      |          |          |
| 42 |         |      |          |          |
| 43 |         |      |          |          |
| 44 |         |      |          |          |
| 45 |         |      |          |          |
| 46 |         |      |          |          |

1  
2  
3  
4  
5  
6  
7  
8  
9  
10  
11  
12  
13  
14  
15  
16  
17  
18  
19  
20  
21  
22  
23  
24  
25  
26  
27  
28  
29  
30  
31  
32  
33  
34  
35  
36  
37  
38  
39  
40  
41  
42  
43  
44  
45  
46

|         |      |          |          |
|---------|------|----------|----------|
| Liberia | 2006 | 0.92007  | 0.923942 |
| Liberia | 2007 | 0.924098 | 0.921404 |
| Liberia | 2008 | 0.926949 | 0.929499 |
| Liberia | 2009 | 0.922828 | 0.930079 |
| Liberia | 2010 | 0.930016 | 0.935905 |
| Liberia | 2011 | 0.941819 | 0.945008 |
| Liberia | 2012 | 0.942946 | 0.943157 |
| Liberia | 2013 | 0.938623 | 0.938907 |
| Liberia | 2014 | 0.940143 | 0.942135 |
| Liberia | 2015 | 0.942099 | 0.941489 |
| Liberia | 2016 | 0.950782 | 0.94713  |
| Liberia | 2017 | 0.957875 | 0.950271 |
| Liberia | 2018 | 0.960514 | 0.9517   |
| Liberia | 2019 | 0.96058  | 0.953451 |
| Libya   | 1990 | 1.055999 | 1.102401 |
| Libya   | 1991 | 1.061455 | 1.107185 |
| Libya   | 1992 | 1.031746 | 1.074807 |
| Libya   | 1993 | 1.021858 | 1.061961 |
| Libya   | 1994 | 1.014832 | 1.051481 |
| Libya   | 1995 | 1.008831 | 1.042201 |
| Libya   | 1996 | 1.016403 | 1.048683 |
| Libya   | 1997 | 1.000094 | 1.031347 |
| Libya   | 1998 | 0.991815 | 1.025339 |
| Libya   | 1999 | 0.982479 | 1.020405 |
| Libya   | 2000 | 0.97538  | 1.013309 |

|           |      |          |          |
|-----------|------|----------|----------|
| Libya     | 2001 | 0.934374 | 0.965433 |
| Libya     | 2002 | 0.904144 | 0.92635  |
| Libya     | 2003 | 0.899903 | 0.916303 |
| Libya     | 2004 | 0.962226 | 0.97716  |
| Libya     | 2005 | 1.003809 | 1.021942 |
| Libya     | 2006 | 1.022    | 1.036288 |
| Libya     | 2007 | 1.116889 | 1.122346 |
| Libya     | 2008 | 1.143164 | 1.149181 |
| Libya     | 2009 | 1.226991 | 1.228515 |
| Libya     | 2010 | 1.20636  | 1.206442 |
| Libya     | 2011 | 1.189759 | 1.190245 |
| Libya     | 2012 | 1.216209 | 1.220529 |
| Libya     | 2013 | 1.219613 | 1.224468 |
| Libya     | 2014 | 1.214545 | 1.220811 |
| Libya     | 2015 | 1.225026 | 1.231131 |
| Libya     | 2016 | 1.228146 | 1.234103 |
| Libya     | 2017 | 1.223734 | 1.228194 |
| Libya     | 2018 | 1.220224 | 1.223662 |
| Libya     | 2019 | 1.214728 | 1.216594 |
| Lithuania | 1990 | 0.971313 | 0.540179 |
| Lithuania | 1991 | 0.985477 | 0.54626  |
| Lithuania | 1992 | 0.989442 | 0.546932 |
| Lithuania | 1993 | 0.949626 | 0.53415  |
| Lithuania | 1994 | 0.96797  | 0.550823 |
| Lithuania | 1995 | 1.00168  | 0.568811 |

|            |      |          |          |
|------------|------|----------|----------|
| Lithuania  | 1996 | 1.019597 | 0.571551 |
| Lithuania  | 1997 | 1.05621  | 0.584609 |
| Lithuania  | 1998 | 1.055637 | 0.581885 |
| Lithuania  | 1999 | 1.050745 | 0.578728 |
| Lithuania  | 2000 | 1.057401 | 0.578423 |
| Lithuania  | 2001 | 1.067042 | 0.580847 |
| Lithuania  | 2002 | 1.080398 | 0.579941 |
| Lithuania  | 2003 | 1.136544 | 0.606356 |
| Lithuania  | 2004 | 1.103524 | 0.587737 |
| Lithuania  | 2005 | 1.084225 | 0.579263 |
| Lithuania  | 2006 | 1.113196 | 0.594664 |
| Lithuania  | 2007 | 1.096276 | 0.583299 |
| Lithuania  | 2008 | 1.198771 | 0.624744 |
| Lithuania  | 2009 | 1.229255 | 0.622287 |
| Lithuania  | 2010 | 1.21543  | 0.605984 |
| Lithuania  | 2011 | 1.22594  | 0.611089 |
| Lithuania  | 2012 | 1.243841 | 0.615975 |
| Lithuania  | 2013 | 1.228526 | 0.60492  |
| Lithuania  | 2014 | 1.242323 | 0.608617 |
| Lithuania  | 2015 | 1.266152 | 0.620736 |
| Lithuania  | 2016 | 1.250372 | 0.614161 |
| Lithuania  | 2017 | 1.337779 | 0.654176 |
| Lithuania  | 2018 | 1.319187 | 0.645546 |
| Lithuania  | 2019 | 1.350657 | 0.661003 |
| Luxembourg | 1990 | 1.393482 | 0.713825 |

|            |      |          |          |
|------------|------|----------|----------|
| Luxembourg | 1991 | 1.405872 | 0.718466 |
| Luxembourg | 1992 | 1.45974  | 0.741392 |
| Luxembourg | 1993 | 1.457165 | 0.737255 |
| Luxembourg | 1994 | 1.465173 | 0.734587 |
| Luxembourg | 1995 | 1.498477 | 0.746412 |
| Luxembourg | 1996 | 1.532323 | 0.762892 |
| Luxembourg | 1997 | 1.541765 | 0.767401 |
| Luxembourg | 1998 | 1.53696  | 0.763833 |
| Luxembourg | 1999 | 1.557634 | 0.771755 |
| Luxembourg | 2000 | 1.583232 | 0.780806 |
| Luxembourg | 2001 | 1.629875 | 0.804553 |
| Luxembourg | 2002 | 1.58333  | 0.786575 |
| Luxembourg | 2003 | 1.541825 | 0.764156 |
| Luxembourg | 2004 | 1.542719 | 0.759595 |
| Luxembourg | 2005 | 1.564119 | 0.7683   |
| Luxembourg | 2006 | 1.568078 | 0.772499 |
| Luxembourg | 2007 | 1.574228 | 0.78169  |
| Luxembourg | 2008 | 1.559942 | 0.780138 |
| Luxembourg | 2009 | 1.486968 | 0.747579 |
| Luxembourg | 2010 | 1.461338 | 0.738203 |
| Luxembourg | 2011 | 1.483877 | 0.760491 |
| Luxembourg | 2012 | 1.434736 | 0.751165 |
| Luxembourg | 2013 | 1.437263 | 0.769188 |
| Luxembourg | 2014 | 1.436678 | 0.781738 |
| Luxembourg | 2015 | 1.449766 | 0.795169 |



1  
2  
3  
4  
5  
6  
7  
8  
9  
10  
11  
12  
13  
14  
15  
16  
17  
18  
19  
20  
21  
22  
23  
24  
25  
26  
27  
28  
29  
30  
31  
32  
33  
34  
35  
36  
37  
38  
39  
40  
41  
42  
43  
44  
45  
46

|            |      |          |          |
|------------|------|----------|----------|
| Luxembourg | 2016 | 1.452105 | 0.803893 |
| Luxembourg | 2017 | 1.424215 | 0.802565 |
| Luxembourg | 2018 | 1.395836 | 0.799804 |
| Luxembourg | 2019 | 1.372174 | 0.796658 |
| Madagascar | 1990 | 0.654498 | 0.630902 |
| Madagascar | 1991 | 0.665058 | 0.636322 |
| Madagascar | 1992 | 0.679494 | 0.646495 |
| Madagascar | 1993 | 0.674667 | 0.639008 |
| Madagascar | 1994 | 0.673359 | 0.633825 |
| Madagascar | 1995 | 0.672929 | 0.631342 |
| Madagascar | 1996 | 0.669081 | 0.625767 |
| Madagascar | 1997 | 0.68748  | 0.638721 |
| Madagascar | 1998 | 0.690612 | 0.638743 |
| Madagascar | 1999 | 0.690685 | 0.635064 |
| Madagascar | 2000 | 0.704869 | 0.643978 |
| Madagascar | 2001 | 0.712433 | 0.64898  |
| Madagascar | 2002 | 0.730031 | 0.662803 |
| Madagascar | 2003 | 0.730674 | 0.662693 |
| Madagascar | 2004 | 0.739866 | 0.667256 |
| Madagascar | 2005 | 0.736319 | 0.660275 |
| Madagascar | 2006 | 0.730087 | 0.65173  |
| Madagascar | 2007 | 0.726425 | 0.64593  |
| Madagascar | 2008 | 0.72202  | 0.640593 |
| Madagascar | 2009 | 0.728877 | 0.645161 |
| Madagascar | 2010 | 0.734435 | 0.649298 |

|    |            |      |          |          |
|----|------------|------|----------|----------|
| 1  |            |      |          |          |
| 2  |            |      |          |          |
| 3  |            |      |          |          |
| 4  |            |      |          |          |
| 5  | Madagascar | 2011 | 0.741916 | 0.654738 |
| 6  | Madagascar | 2012 | 0.749575 | 0.661406 |
| 7  | Madagascar | 2013 | 0.756602 | 0.668668 |
| 8  | Madagascar | 2014 | 0.764441 | 0.6762   |
| 9  | Madagascar | 2015 | 0.770191 | 0.682863 |
| 10 | Madagascar | 2016 | 0.774117 | 0.690311 |
| 11 | Madagascar | 2017 | 0.779615 | 0.698152 |
| 12 | Madagascar | 2018 | 0.78173  | 0.702984 |
| 13 | Madagascar | 2019 | 0.783939 | 0.70848  |
| 14 | Madagascar | 2019 | 0.783939 | 0.70848  |
| 15 | Malawi     | 1990 | 0.863324 | 0.714457 |
| 16 | Malawi     | 1991 | 0.838268 | 0.692198 |
| 17 | Malawi     | 1992 | 0.814011 | 0.670492 |
| 18 | Malawi     | 1993 | 0.796118 | 0.651846 |
| 19 | Malawi     | 1994 | 0.780322 | 0.635558 |
| 20 | Malawi     | 1995 | 0.762866 | 0.621129 |
| 21 | Malawi     | 1996 | 0.748306 | 0.610385 |
| 22 | Malawi     | 1997 | 0.734158 | 0.599556 |
| 23 | Malawi     | 1998 | 0.72624  | 0.593395 |
| 24 | Malawi     | 1999 | 0.724455 | 0.586929 |
| 25 | Malawi     | 2000 | 0.715552 | 0.575648 |
| 26 | Malawi     | 2001 | 0.705807 | 0.565471 |
| 27 | Malawi     | 2002 | 0.70057  | 0.558742 |
| 28 | Malawi     | 2003 | 0.700275 | 0.556185 |
| 29 | Malawi     | 2004 | 0.690505 | 0.54759  |
| 30 | Malawi     | 2005 | 0.684543 | 0.540365 |
| 31 | Malawi     | 2005 | 0.684543 | 0.540365 |
| 32 |            |      |          |          |
| 33 |            |      |          |          |
| 34 |            |      |          |          |
| 35 |            |      |          |          |
| 36 |            |      |          |          |
| 37 |            |      |          |          |
| 38 |            |      |          |          |
| 39 |            |      |          |          |
| 40 |            |      |          |          |
| 41 |            |      |          |          |
| 42 |            |      |          |          |
| 43 |            |      |          |          |
| 44 |            |      |          |          |
| 45 |            |      |          |          |
| 46 |            |      |          |          |

1  
2  
3  
4  
5  
6  
7  
8  
9  
10  
11  
12  
13  
14  
15  
16  
17  
18  
19  
20  
21  
22  
23  
24  
25  
26  
27  
28  
29  
30  
31  
32  
33  
34  
35  
36  
37  
38  
39  
40  
41  
42  
43  
44  
45  
46

|          |      |          |          |
|----------|------|----------|----------|
| Malawi   | 2006 | 0.682796 | 0.534722 |
| Malawi   | 2007 | 0.686828 | 0.535867 |
| Malawi   | 2008 | 0.697033 | 0.54052  |
| Malawi   | 2009 | 0.707276 | 0.54586  |
| Malawi   | 2010 | 0.71033  | 0.546968 |
| Malawi   | 2011 | 0.714983 | 0.54886  |
| Malawi   | 2012 | 0.724143 | 0.555918 |
| Malawi   | 2013 | 0.733413 | 0.563464 |
| Malawi   | 2014 | 0.737841 | 0.569168 |
| Malawi   | 2015 | 0.74575  | 0.576821 |
| Malawi   | 2016 | 0.748773 | 0.583159 |
| Malawi   | 2017 | 0.754559 | 0.591801 |
| Malawi   | 2018 | 0.760637 | 0.599123 |
| Malawi   | 2019 | 0.765263 | 0.605597 |
| Malaysia | 1990 | 0.819196 | 0.788761 |
| Malaysia | 1991 | 0.846018 | 0.816191 |
| Malaysia | 1992 | 0.886443 | 0.853191 |
| Malaysia | 1993 | 0.94471  | 0.913312 |
| Malaysia | 1994 | 0.975225 | 0.954186 |
| Malaysia | 1995 | 0.982179 | 0.948723 |
| Malaysia | 1996 | 0.950804 | 0.889981 |
| Malaysia | 1997 | 0.965724 | 0.902726 |
| Malaysia | 1998 | 1.026153 | 0.991537 |
| Malaysia | 1999 | 1.047448 | 1.026159 |
| Malaysia | 2000 | 1.034293 | 1.007025 |

|    |          |      |          |          |
|----|----------|------|----------|----------|
| 1  |          |      |          |          |
| 2  |          |      |          |          |
| 3  |          |      |          |          |
| 4  |          |      |          |          |
| 5  | Malaysia | 2001 | 1.027312 | 0.987668 |
| 6  | Malaysia | 2002 | 1.078764 | 1.04399  |
| 7  | Malaysia | 2003 | 1.063797 | 1.039922 |
| 8  | Malaysia | 2004 | 1.060262 | 1.061847 |
| 9  | Malaysia | 2005 | 1.066861 | 1.080876 |
| 10 | Malaysia | 2006 | 1.07099  | 1.094214 |
| 11 | Malaysia | 2007 | 1.072336 | 1.107498 |
| 12 | Malaysia | 2008 | 1.059789 | 1.110449 |
| 13 | Malaysia | 2009 | 1.063617 | 1.123318 |
| 14 | Malaysia | 2010 | 1.057671 | 1.11054  |
| 15 | Malaysia | 2011 | 1.04982  | 1.098519 |
| 16 | Malaysia | 2012 | 1.067402 | 1.137766 |
| 17 | Malaysia | 2013 | 1.064808 | 1.180301 |
| 18 | Malaysia | 2014 | 1.056546 | 1.179    |
| 19 | Malaysia | 2015 | 1.053687 | 1.173967 |
| 20 | Malaysia | 2016 | 1.045563 | 1.136786 |
| 21 | Malaysia | 2017 | 1.04171  | 1.122423 |
| 22 | Malaysia | 2018 | 1.044457 | 1.117039 |
| 23 | Malaysia | 2019 | 1.041762 | 1.08757  |
| 24 | Maldives | 1990 | 0.963518 | 1.206453 |
| 25 | Maldives | 1991 | 0.972691 | 1.238021 |
| 26 | Maldives | 1992 | 0.98505  | 1.276931 |
| 27 | Maldives | 1993 | 0.95509  | 1.239805 |
| 28 | Maldives | 1994 | 0.900192 | 1.140108 |
| 29 | Maldives | 1995 | 0.914347 | 1.166679 |
| 30 |          |      |          |          |
| 31 |          |      |          |          |
| 32 |          |      |          |          |
| 33 |          |      |          |          |
| 34 |          |      |          |          |
| 35 |          |      |          |          |
| 36 |          |      |          |          |
| 37 |          |      |          |          |
| 38 |          |      |          |          |
| 39 |          |      |          |          |
| 40 |          |      |          |          |
| 41 |          |      |          |          |
| 42 |          |      |          |          |
| 43 |          |      |          |          |
| 44 |          |      |          |          |
| 45 |          |      |          |          |
| 46 |          |      |          |          |

1  
2  
3  
4  
5  
6  
7  
8  
9  
10  
11  
12  
13  
14  
15  
16  
17  
18  
19  
20  
21  
22  
23  
24  
25  
26  
27  
28  
29  
30  
31  
32  
33  
34  
35  
36  
37  
38  
39  
40  
41  
42  
43  
44  
45  
46

|          |      |          |          |
|----------|------|----------|----------|
| Maldives | 1996 | 0.962101 | 1.260357 |
| Maldives | 1997 | 0.99324  | 1.318302 |
| Maldives | 1998 | 0.950574 | 1.23224  |
| Maldives | 1999 | 0.950123 | 1.207546 |
| Maldives | 2000 | 0.963335 | 1.233702 |
| Maldives | 2001 | 0.952392 | 1.219721 |
| Maldives | 2002 | 0.85437  | 1.079451 |
| Maldives | 2003 | 0.855313 | 1.076779 |
| Maldives | 2004 | 0.863548 | 1.078919 |
| Maldives | 2005 | 0.867198 | 1.075533 |
| Maldives | 2006 | 0.878145 | 1.082157 |
| Maldives | 2007 | 0.896513 | 1.09889  |
| Maldives | 2008 | 0.915916 | 1.116226 |
| Maldives | 2009 | 0.944785 | 1.145004 |
| Maldives | 2010 | 0.961791 | 1.162282 |
| Maldives | 2011 | 0.957437 | 1.155309 |
| Maldives | 2012 | 0.951009 | 1.149364 |
| Maldives | 2013 | 0.938156 | 1.13562  |
| Maldives | 2014 | 0.919664 | 1.11528  |
| Maldives | 2015 | 0.897286 | 1.09207  |
| Maldives | 2016 | 0.902015 | 1.100388 |
| Maldives | 2017 | 0.903999 | 1.105606 |
| Maldives | 2018 | 0.905796 | 1.110964 |
| Maldives | 2019 | 0.90613  | 1.11559  |
| Mali     | 1990 | 1.052152 | 0.960348 |

|      |      |          |          |
|------|------|----------|----------|
| Mali | 1991 | 1.049099 | 0.963432 |
| Mali | 1992 | 1.04031  | 0.962519 |
| Mali | 1993 | 1.024426 | 0.95587  |
| Mali | 1994 | 1.014837 | 0.953214 |
| Mali | 1995 | 1.01442  | 0.958046 |
| Mali | 1996 | 1.009798 | 0.959951 |
| Mali | 1997 | 1.013619 | 0.970303 |
| Mali | 1998 | 1.006038 | 0.969867 |
| Mali | 1999 | 0.988446 | 0.959086 |
| Mali | 2000 | 0.979709 | 0.955419 |
| Mali | 2001 | 0.967442 | 0.950056 |
| Mali | 2002 | 0.956589 | 0.943906 |
| Mali | 2003 | 0.948678 | 0.941863 |
| Mali | 2004 | 0.931661 | 0.929066 |
| Mali | 2005 | 0.920049 | 0.920402 |
| Mali | 2006 | 0.912475 | 0.915756 |
| Mali | 2007 | 0.896128 | 0.902561 |
| Mali | 2008 | 0.880758 | 0.889383 |
| Mali | 2009 | 0.8671   | 0.8774   |
| Mali | 2010 | 0.862463 | 0.874125 |
| Mali | 2011 | 0.861756 | 0.875638 |
| Mali | 2012 | 0.860395 | 0.876241 |
| Mali | 2013 | 0.852067 | 0.868954 |
| Mali | 2014 | 0.849678 | 0.868136 |
| Mali | 2015 | 0.842445 | 0.862383 |

1  
2  
3  
4  
5  
6  
7  
8  
9  
10  
11  
12  
13  
14  
15  
16  
17  
18  
19  
20  
21  
22  
23  
24  
25  
26  
27  
28  
29  
30  
31  
32  
33  
34  
35  
36  
37  
38  
39  
40  
41  
42  
43  
44  
45  
46

|       |      |          |          |
|-------|------|----------|----------|
| Mali  | 2016 | 0.832439 | 0.855942 |
| Mali  | 2017 | 0.822786 | 0.849405 |
| Mali  | 2018 | 0.827136 | 0.855255 |
| Mali  | 2019 | 0.830844 | 0.85997  |
| Malta | 1990 | 1.008276 | 0.651471 |
| Malta | 1991 | 1.030094 | 0.651632 |
| Malta | 1992 | 1.060652 | 0.662053 |
| Malta | 1993 | 1.091122 | 0.675794 |
| Malta | 1994 | 1.154814 | 0.722773 |
| Malta | 1995 | 1.172958 | 0.735947 |
| Malta | 1996 | 1.138106 | 0.716251 |
| Malta | 1997 | 1.119391 | 0.702479 |
| Malta | 1998 | 1.163283 | 0.728761 |
| Malta | 1999 | 1.16292  | 0.731829 |
| Malta | 2000 | 1.163634 | 0.732145 |
| Malta | 2001 | 1.136787 | 0.714885 |
| Malta | 2002 | 1.094725 | 0.687322 |
| Malta | 2003 | 1.085162 | 0.685129 |
| Malta | 2004 | 1.089569 | 0.692118 |
| Malta | 2005 | 1.035043 | 0.659262 |
| Malta | 2006 | 1.047596 | 0.668544 |
| Malta | 2007 | 1.038632 | 0.664038 |
| Malta | 2008 | 1.016727 | 0.651006 |
| Malta | 2009 | 1.034098 | 0.663307 |
| Malta | 2010 | 1.009965 | 0.647124 |

|    |                  |      |          |          |
|----|------------------|------|----------|----------|
| 1  |                  |      |          |          |
| 2  |                  |      |          |          |
| 3  |                  |      |          |          |
| 4  |                  |      |          |          |
| 5  | Malta            | 2011 | 1.002912 | 0.643467 |
| 6  | Malta            | 2012 | 1.017241 | 0.650393 |
| 7  | Malta            | 2013 | 1.027006 | 0.65451  |
| 8  | Malta            | 2014 | 1.031116 | 0.659429 |
| 9  | Malta            | 2015 | 1.140398 | 0.725348 |
| 10 | Malta            | 2016 | 1.132609 | 0.72308  |
| 11 | Malta            | 2017 | 1.126121 | 0.720151 |
| 12 | Malta            | 2018 | 1.114579 | 0.716802 |
| 13 | Malta            | 2019 | 1.098586 | 0.713248 |
| 14 | Malta            | 2019 | 1.098586 | 0.713248 |
| 15 | Malta            | 2019 | 1.098586 | 0.713248 |
| 16 | Malta            | 2019 | 1.098586 | 0.713248 |
| 17 | Marshall Islands | 1990 | 0.829497 | 0.73961  |
| 18 | Marshall Islands | 1991 | 0.84873  | 0.754036 |
| 19 | Marshall Islands | 1992 | 0.862116 | 0.764425 |
| 20 | Marshall Islands | 1993 | 0.895229 | 0.794611 |
| 21 | Marshall Islands | 1994 | 1.000765 | 0.922647 |
| 22 | Marshall Islands | 1995 | 1.014702 | 0.941943 |
| 23 | Marshall Islands | 1996 | 1.041135 | 0.970383 |
| 24 | Marshall Islands | 1997 | 1.044842 | 0.980008 |
| 25 | Marshall Islands | 1998 | 1.04679  | 0.986713 |
| 26 | Marshall Islands | 1999 | 1.041891 | 0.986813 |
| 27 | Marshall Islands | 2000 | 1.037892 | 0.986503 |
| 28 | Marshall Islands | 2001 | 1.034632 | 0.986928 |
| 29 | Marshall Islands | 2002 | 1.035458 | 0.991621 |
| 30 | Marshall Islands | 2003 | 1.033946 | 0.994506 |
| 31 | Marshall Islands | 2004 | 1.043391 | 1.007015 |
| 32 | Marshall Islands | 2005 | 1.033638 | 1.00178  |
| 33 | Marshall Islands | 2005 | 1.033638 | 1.00178  |
| 34 | Marshall Islands | 2005 | 1.033638 | 1.00178  |
| 35 | Marshall Islands | 2005 | 1.033638 | 1.00178  |
| 36 | Marshall Islands | 2005 | 1.033638 | 1.00178  |
| 37 | Marshall Islands | 2005 | 1.033638 | 1.00178  |
| 38 | Marshall Islands | 2005 | 1.033638 | 1.00178  |
| 39 |                  |      |          |          |
| 40 |                  |      |          |          |
| 41 |                  |      |          |          |
| 42 |                  |      |          |          |
| 43 |                  |      |          |          |
| 44 |                  |      |          |          |
| 45 |                  |      |          |          |
| 46 |                  |      |          |          |



1  
2  
3  
4  
5  
6  
7  
8  
9  
10  
11  
12  
13  
14  
15  
16  
17  
18  
19  
20  
21  
22  
23  
24  
25  
26  
27  
28  
29  
30  
31  
32  
33  
34  
35  
36  
37  
38  
39  
40  
41  
42  
43  
44  
45  
46

|                  |      |          |          |
|------------------|------|----------|----------|
| Marshall Islands | 2006 | 1.024225 | 0.996898 |
| Marshall Islands | 2007 | 1.005892 | 0.982809 |
| Marshall Islands | 2008 | 0.989552 | 0.970255 |
| Marshall Islands | 2009 | 0.978998 | 0.962731 |
| Marshall Islands | 2010 | 0.973948 | 0.960239 |
| Marshall Islands | 2011 | 0.966812 | 0.954487 |
| Marshall Islands | 2012 | 0.960175 | 0.948971 |
| Marshall Islands | 2013 | 0.955867 | 0.945321 |
| Marshall Islands | 2014 | 0.950784 | 0.939663 |
| Marshall Islands | 2015 | 0.947166 | 0.936217 |
| Marshall Islands | 2016 | 0.946444 | 0.934338 |
| Marshall Islands | 2017 | 0.948871 | 0.935285 |
| Marshall Islands | 2018 | 0.94816  | 0.933495 |
| Marshall Islands | 2019 | 0.948073 | 0.931827 |
| Mauritania       | 1990 | 1.292419 | 1.123301 |
| Mauritania       | 1991 | 1.304114 | 1.144613 |
| Mauritania       | 1992 | 1.311313 | 1.163473 |
| Mauritania       | 1993 | 1.316344 | 1.181659 |
| Mauritania       | 1994 | 1.321783 | 1.193751 |
| Mauritania       | 1995 | 1.330612 | 1.208804 |
| Mauritania       | 1996 | 1.334792 | 1.220411 |
| Mauritania       | 1997 | 1.337735 | 1.23014  |
| Mauritania       | 1998 | 1.342861 | 1.23923  |
| Mauritania       | 1999 | 1.355719 | 1.257931 |
| Mauritania       | 2000 | 1.354422 | 1.266274 |

|            |      |          |          |
|------------|------|----------|----------|
| Mauritania | 2001 | 1.338039 | 1.263431 |
| Mauritania | 2002 | 1.326071 | 1.263031 |
| Mauritania | 2003 | 1.32429  | 1.269958 |
| Mauritania | 2004 | 1.312932 | 1.26527  |
| Mauritania | 2005 | 1.308692 | 1.266842 |
| Mauritania | 2006 | 1.304456 | 1.274066 |
| Mauritania | 2007 | 1.286568 | 1.263329 |
| Mauritania | 2008 | 1.259677 | 1.245972 |
| Mauritania | 2009 | 1.226907 | 1.223864 |
| Mauritania | 2010 | 1.206542 | 1.21002  |
| Mauritania | 2011 | 1.194471 | 1.198175 |
| Mauritania | 2012 | 1.18269  | 1.187555 |
| Mauritania | 2013 | 1.170872 | 1.180314 |
| Mauritania | 2014 | 1.181396 | 1.189417 |
| Mauritania | 2015 | 1.185942 | 1.195127 |
| Mauritania | 2016 | 1.190154 | 1.203213 |
| Mauritania | 2017 | 1.186943 | 1.204661 |
| Mauritania | 2018 | 1.18427  | 1.206028 |
| Mauritania | 2019 | 1.182881 | 1.204325 |
| Mauritius  | 1990 | 0.93321  | 0.754336 |
| Mauritius  | 1991 | 0.950503 | 0.755029 |
| Mauritius  | 1992 | 1.044833 | 0.830833 |
| Mauritius  | 1993 | 0.972502 | 0.775092 |
| Mauritius  | 1994 | 0.996268 | 0.7839   |
| Mauritius  | 1995 | 0.988114 | 0.789355 |

|           |      |          |          |
|-----------|------|----------|----------|
| Mauritius | 1996 | 0.923973 | 0.738861 |
| Mauritius | 1997 | 0.899823 | 0.699261 |
| Mauritius | 1998 | 0.910683 | 0.702415 |
| Mauritius | 1999 | 0.928566 | 0.717855 |
| Mauritius | 2000 | 0.995053 | 0.77431  |
| Mauritius | 2001 | 0.979239 | 0.769047 |
| Mauritius | 2002 | 0.899328 | 0.7055   |
| Mauritius | 2003 | 0.943053 | 0.733968 |
| Mauritius | 2004 | 0.925262 | 0.723859 |
| Mauritius | 2005 | 0.92733  | 0.727248 |
| Mauritius | 2006 | 0.942548 | 0.745284 |
| Mauritius | 2007 | 0.934733 | 0.753928 |
| Mauritius | 2008 | 0.902499 | 0.735209 |
| Mauritius | 2009 | 0.855919 | 0.696554 |
| Mauritius | 2010 | 0.884717 | 0.710758 |
| Mauritius | 2011 | 0.843754 | 0.678107 |
| Mauritius | 2012 | 0.895397 | 0.714052 |
| Mauritius | 2013 | 0.870548 | 0.695416 |
| Mauritius | 2014 | 0.872555 | 0.701738 |
| Mauritius | 2015 | 0.849229 | 0.685232 |
| Mauritius | 2016 | 0.828713 | 0.669571 |
| Mauritius | 2017 | 0.889327 | 0.717066 |
| Mauritius | 2018 | 0.873638 | 0.706288 |
| Mauritius | 2019 | 0.865816 | 0.699819 |
| Mexico    | 1990 | 1.078398 | 1.048632 |

|        |      |          |          |
|--------|------|----------|----------|
| Mexico | 1991 | 1.075019 | 1.040023 |
| Mexico | 1992 | 1.086669 | 1.043003 |
| Mexico | 1993 | 1.091016 | 1.040778 |
| Mexico | 1994 | 1.082324 | 1.027802 |
| Mexico | 1995 | 1.095406 | 1.033573 |
| Mexico | 1996 | 1.094571 | 1.026731 |
| Mexico | 1997 | 1.094724 | 1.022765 |
| Mexico | 1998 | 1.102235 | 1.022629 |
| Mexico | 1999 | 1.120489 | 1.033242 |
| Mexico | 2000 | 1.097268 | 1.009582 |
| Mexico | 2001 | 1.101573 | 1.009819 |
| Mexico | 2002 | 1.080918 | 0.987715 |
| Mexico | 2003 | 1.074058 | 0.97873  |
| Mexico | 2004 | 1.071029 | 0.974993 |
| Mexico | 2005 | 1.053626 | 0.959082 |
| Mexico | 2006 | 1.049174 | 0.953395 |
| Mexico | 2007 | 1.047691 | 0.950921 |
| Mexico | 2008 | 1.020609 | 0.923375 |
| Mexico | 2009 | 1.031489 | 0.928038 |
| Mexico | 2010 | 1.033104 | 0.92865  |
| Mexico | 2011 | 1.016719 | 0.911677 |
| Mexico | 2012 | 1.010454 | 0.902523 |
| Mexico | 2013 | 0.984236 | 0.875506 |
| Mexico | 2014 | 0.978046 | 0.867256 |
| Mexico | 2015 | 0.960093 | 0.848844 |

|    |                                  |      |          |          |
|----|----------------------------------|------|----------|----------|
| 1  |                                  |      |          |          |
| 2  |                                  |      |          |          |
| 3  |                                  |      |          |          |
| 4  |                                  |      |          |          |
| 5  | Mexico                           | 2016 | 0.946389 | 0.834406 |
| 6  | Mexico                           | 2017 | 0.919663 | 0.808347 |
| 7  | Mexico                           | 2018 | 0.92066  | 0.806294 |
| 8  | Mexico                           | 2019 | 0.912661 | 0.794804 |
| 9  |                                  |      |          |          |
| 10 | Micronesia (Federated States of) | 1990 | 1.044948 | 0.976014 |
| 11 | Micronesia (Federated States of) | 1991 | 1.063367 | 0.987065 |
| 12 | Micronesia (Federated States of) | 1992 | 1.085287 | 1.00053  |
| 13 | Micronesia (Federated States of) | 1993 | 1.104225 | 1.010412 |
| 14 | Micronesia (Federated States of) | 1994 | 1.127485 | 1.023454 |
| 15 | Micronesia (Federated States of) | 1995 | 1.154087 | 1.039054 |
| 16 | Micronesia (Federated States of) | 1996 | 1.175387 | 1.049479 |
| 17 | Micronesia (Federated States of) | 1997 | 1.192982 | 1.057541 |
| 18 | Micronesia (Federated States of) | 1998 | 1.205251 | 1.061571 |
| 19 | Micronesia (Federated States of) | 1999 | 1.216182 | 1.065192 |
| 20 | Micronesia (Federated States of) | 2000 | 1.22136  | 1.064296 |
| 21 | Micronesia (Federated States of) | 2001 | 1.227829 | 1.06496  |
| 22 | Micronesia (Federated States of) | 2002 | 1.23739  | 1.069029 |
| 23 | Micronesia (Federated States of) | 2003 | 1.224554 | 1.054574 |
| 24 | Micronesia (Federated States of) | 2004 | 1.221401 | 1.049043 |
| 25 | Micronesia (Federated States of) | 2005 | 1.212073 | 1.039666 |
| 26 | Micronesia (Federated States of) | 2006 | 1.227931 | 1.050787 |
| 27 | Micronesia (Federated States of) | 2007 | 1.19562  | 1.021078 |
| 28 | Micronesia (Federated States of) | 2008 | 1.162752 | 0.99167  |
| 29 | Micronesia (Federated States of) | 2009 | 1.129838 | 0.96289  |
| 30 | Micronesia (Federated States of) | 2010 | 1.101329 | 0.937482 |
| 31 |                                  |      |          |          |
| 32 |                                  |      |          |          |
| 33 |                                  |      |          |          |
| 34 |                                  |      |          |          |
| 35 |                                  |      |          |          |
| 36 |                                  |      |          |          |
| 37 |                                  |      |          |          |
| 38 |                                  |      |          |          |
| 39 |                                  |      |          |          |
| 40 |                                  |      |          |          |
| 41 |                                  |      |          |          |
| 42 |                                  |      |          |          |
| 43 |                                  |      |          |          |
| 44 |                                  |      |          |          |
| 45 |                                  |      |          |          |
| 46 |                                  |      |          |          |

|    |                                  |      |          |          |
|----|----------------------------------|------|----------|----------|
| 1  |                                  |      |          |          |
| 2  |                                  |      |          |          |
| 3  |                                  |      |          |          |
| 4  |                                  |      |          |          |
| 5  | Micronesia (Federated States of) | 2011 | 1.064706 | 0.907    |
| 6  | Micronesia (Federated States of) | 2012 | 1.034839 | 0.882568 |
| 7  | Micronesia (Federated States of) | 2013 | 1.009272 | 0.861923 |
| 8  | Micronesia (Federated States of) | 2014 | 0.988996 | 0.845971 |
| 9  | Micronesia (Federated States of) | 2015 | 0.97729  | 0.835961 |
| 10 | Micronesia (Federated States of) | 2016 | 0.962942 | 0.825061 |
| 11 | Micronesia (Federated States of) | 2017 | 0.959648 | 0.823572 |
| 12 | Micronesia (Federated States of) | 2018 | 0.955921 | 0.821916 |
| 13 | Micronesia (Federated States of) | 2019 | 0.951491 | 0.819525 |
| 14 | Monaco                           | 1990 | 0.925141 | 0.509605 |
| 15 | Monaco                           | 1991 | 0.927871 | 0.511247 |
| 16 | Monaco                           | 1992 | 0.935894 | 0.515033 |
| 17 | Monaco                           | 1993 | 0.947152 | 0.520603 |
| 18 | Monaco                           | 1994 | 0.958841 | 0.52651  |
| 19 | Monaco                           | 1995 | 0.968499 | 0.532215 |
| 20 | Monaco                           | 1996 | 0.976394 | 0.538766 |
| 21 | Monaco                           | 1997 | 0.991226 | 0.548622 |
| 22 | Monaco                           | 1998 | 1.010798 | 0.560403 |
| 23 | Monaco                           | 1999 | 1.034407 | 0.573567 |
| 24 | Monaco                           | 2000 | 1.055584 | 0.586374 |
| 25 | Monaco                           | 2001 | 1.068534 | 0.59852  |
| 26 | Monaco                           | 2002 | 1.075324 | 0.609122 |
| 27 | Monaco                           | 2003 | 1.081212 | 0.620175 |
| 28 | Monaco                           | 2004 | 1.086635 | 0.630366 |
| 29 | Monaco                           | 2005 | 1.088433 | 0.639145 |
| 30 |                                  |      |          |          |
| 31 |                                  |      |          |          |
| 32 |                                  |      |          |          |
| 33 |                                  |      |          |          |
| 34 |                                  |      |          |          |
| 35 |                                  |      |          |          |
| 36 |                                  |      |          |          |
| 37 |                                  |      |          |          |
| 38 |                                  |      |          |          |
| 39 |                                  |      |          |          |
| 40 |                                  |      |          |          |
| 41 |                                  |      |          |          |
| 42 |                                  |      |          |          |
| 43 |                                  |      |          |          |
| 44 |                                  |      |          |          |
| 45 |                                  |      |          |          |
| 46 |                                  |      |          |          |

|    |          |      |          |          |
|----|----------|------|----------|----------|
| 1  |          |      |          |          |
| 2  |          |      |          |          |
| 3  |          |      |          |          |
| 4  |          |      |          |          |
| 5  | Monaco   | 2006 | 1.082645 | 0.645151 |
| 6  | Monaco   | 2007 | 1.070951 | 0.648902 |
| 7  | Monaco   | 2008 | 1.059886 | 0.653042 |
| 8  | Monaco   | 2009 | 1.054282 | 0.658945 |
| 9  | Monaco   | 2010 | 1.052876 | 0.666098 |
| 10 | Monaco   | 2011 | 1.050548 | 0.672052 |
| 11 | Monaco   | 2012 | 1.046823 | 0.678352 |
| 12 | Monaco   | 2013 | 1.03124  | 0.674487 |
| 13 | Monaco   | 2014 | 1.025477 | 0.675192 |
| 14 | Monaco   | 2015 | 1.022501 | 0.676323 |
| 15 | Monaco   | 2016 | 1.017735 | 0.675253 |
| 16 | Monaco   | 2017 | 1.011475 | 0.673635 |
| 17 | Monaco   | 2018 | 1.004845 | 0.672659 |
| 18 | Monaco   | 2019 | 0.997704 | 0.670993 |
| 19 | Mongolia | 1990 | 1.068489 | 0.837677 |
| 20 | Mongolia | 1991 | 1.083221 | 0.846939 |
| 21 | Mongolia | 1992 | 1.081256 | 0.854461 |
| 22 | Mongolia | 1993 | 1.092407 | 0.854763 |
| 23 | Mongolia | 1994 | 1.087824 | 0.850761 |
| 24 | Mongolia | 1995 | 1.079002 | 0.852306 |
| 25 | Mongolia | 1996 | 1.060124 | 0.840739 |
| 26 | Mongolia | 1997 | 1.082339 | 0.856448 |
| 27 | Mongolia | 1998 | 1.074045 | 0.833624 |
| 28 | Mongolia | 1999 | 1.084455 | 0.837111 |
| 29 | Mongolia | 2000 | 1.047604 | 0.821764 |
| 30 |          |      |          |          |
| 31 |          |      |          |          |
| 32 |          |      |          |          |
| 33 |          |      |          |          |
| 34 |          |      |          |          |
| 35 |          |      |          |          |
| 36 |          |      |          |          |
| 37 |          |      |          |          |
| 38 |          |      |          |          |
| 39 |          |      |          |          |
| 40 |          |      |          |          |
| 41 |          |      |          |          |
| 42 |          |      |          |          |
| 43 |          |      |          |          |
| 44 |          |      |          |          |
| 45 |          |      |          |          |
| 46 |          |      |          |          |

|            |      |          |          |
|------------|------|----------|----------|
| Mongolia   | 2001 | 0.976921 | 0.761449 |
| Mongolia   | 2002 | 0.921562 | 0.715086 |
| Mongolia   | 2003 | 0.882353 | 0.687733 |
| Mongolia   | 2004 | 0.854392 | 0.675443 |
| Mongolia   | 2005 | 0.832971 | 0.664011 |
| Mongolia   | 2006 | 0.833794 | 0.662218 |
| Mongolia   | 2007 | 0.823721 | 0.663589 |
| Mongolia   | 2008 | 0.819758 | 0.675399 |
| Mongolia   | 2009 | 0.832738 | 0.69269  |
| Mongolia   | 2010 | 0.825495 | 0.676345 |
| Mongolia   | 2011 | 0.81695  | 0.665265 |
| Mongolia   | 2012 | 0.819276 | 0.684519 |
| Mongolia   | 2013 | 0.808343 | 0.682186 |
| Mongolia   | 2014 | 0.795602 | 0.677174 |
| Mongolia   | 2015 | 0.795543 | 0.676357 |
| Mongolia   | 2016 | 0.790086 | 0.663606 |
| Mongolia   | 2017 | 0.794348 | 0.661505 |
| Mongolia   | 2018 | 0.793758 | 0.653293 |
| Mongolia   | 2019 | 0.788673 | 0.633037 |
| Montenegro | 1990 | 0.730016 | 0.531763 |
| Montenegro | 1991 | 0.733277 | 0.528923 |
| Montenegro | 1992 | 0.752784 | 0.539443 |
| Montenegro | 1993 | 0.760196 | 0.546079 |
| Montenegro | 1994 | 0.793137 | 0.571782 |
| Montenegro | 1995 | 0.803658 | 0.58153  |



1  
2  
3  
4  
5  
6  
7  
8  
9  
10  
11  
12  
13  
14  
15  
16  
17  
18  
19  
20  
21  
22  
23  
24  
25  
26  
27  
28  
29  
30  
31  
32  
33  
34  
35  
36  
37  
38  
39  
40  
41  
42  
43  
44  
45  
46

|            |      |          |          |
|------------|------|----------|----------|
| Montenegro | 1996 | 0.816688 | 0.593459 |
| Montenegro | 1997 | 0.803945 | 0.587557 |
| Montenegro | 1998 | 0.800749 | 0.587413 |
| Montenegro | 1999 | 0.806197 | 0.590958 |
| Montenegro | 2000 | 0.831277 | 0.61343  |
| Montenegro | 2001 | 0.83478  | 0.624572 |
| Montenegro | 2002 | 0.812396 | 0.611387 |
| Montenegro | 2003 | 0.800159 | 0.604112 |
| Montenegro | 2004 | 0.776479 | 0.583612 |
| Montenegro | 2005 | 0.749911 | 0.558299 |
| Montenegro | 2006 | 0.761925 | 0.567128 |
| Montenegro | 2007 | 0.800333 | 0.592415 |
| Montenegro | 2008 | 0.829676 | 0.616523 |
| Montenegro | 2009 | 0.849739 | 0.637266 |
| Montenegro | 2010 | 0.862346 | 0.649889 |
| Montenegro | 2011 | 0.845212 | 0.642788 |
| Montenegro | 2012 | 0.851893 | 0.648937 |
| Montenegro | 2013 | 0.843268 | 0.645223 |
| Montenegro | 2014 | 0.848705 | 0.651204 |
| Montenegro | 2015 | 0.842623 | 0.641021 |
| Montenegro | 2016 | 0.809543 | 0.606147 |
| Montenegro | 2017 | 0.802626 | 0.594613 |
| Montenegro | 2018 | 0.825529 | 0.60972  |
| Montenegro | 2019 | 0.810302 | 0.592792 |
| Morocco    | 1990 | 0.99491  | 0.878909 |

|         |      |          |          |
|---------|------|----------|----------|
| Morocco | 1991 | 0.991678 | 0.881717 |
| Morocco | 1992 | 0.946036 | 0.847594 |
| Morocco | 1993 | 0.935928 | 0.840068 |
| Morocco | 1994 | 0.94912  | 0.849024 |
| Morocco | 1995 | 0.952789 | 0.849879 |
| Morocco | 1996 | 0.973631 | 0.873777 |
| Morocco | 1997 | 0.987708 | 0.885371 |
| Morocco | 1998 | 0.96864  | 0.862799 |
| Morocco | 1999 | 0.966075 | 0.851575 |
| Morocco | 2000 | 1.027192 | 0.934749 |
| Morocco | 2001 | 1.1055   | 1.039632 |
| Morocco | 2002 | 1.172219 | 1.105859 |
| Morocco | 2003 | 1.178042 | 1.112077 |
| Morocco | 2004 | 1.210291 | 1.158825 |
| Morocco | 2005 | 1.232854 | 1.193653 |
| Morocco | 2006 | 1.241772 | 1.213695 |
| Morocco | 2007 | 1.25736  | 1.236321 |
| Morocco | 2008 | 1.258971 | 1.247946 |
| Morocco | 2009 | 1.258156 | 1.25791  |
| Morocco | 2010 | 1.260311 | 1.270169 |
| Morocco | 2011 | 1.257748 | 1.277081 |
| Morocco | 2012 | 1.235274 | 1.256931 |
| Morocco | 2013 | 1.049889 | 1.040043 |
| Morocco | 2014 | 1.068511 | 1.042004 |
| Morocco | 2015 | 1.085833 | 1.043414 |

|    |            |      |          |          |
|----|------------|------|----------|----------|
| 1  |            |      |          |          |
| 2  |            |      |          |          |
| 3  |            |      |          |          |
| 4  |            |      |          |          |
| 5  | Morocco    | 2016 | 1.097535 | 1.040243 |
| 6  | Morocco    | 2017 | 1.107104 | 1.035671 |
| 7  | Morocco    | 2018 | 1.112476 | 1.03045  |
| 8  | Morocco    | 2019 | 1.116306 | 1.025441 |
| 9  | Morocco    | 2019 | 1.116306 | 1.025441 |
| 10 | Mozambique | 1990 | 0.7455   | 0.632955 |
| 11 | Mozambique | 1991 | 0.740092 | 0.623329 |
| 12 | Mozambique | 1992 | 0.735712 | 0.617705 |
| 13 | Mozambique | 1992 | 0.735712 | 0.617705 |
| 14 | Mozambique | 1993 | 0.723898 | 0.608977 |
| 15 | Mozambique | 1994 | 0.719732 | 0.605701 |
| 16 | Mozambique | 1994 | 0.719732 | 0.605701 |
| 17 | Mozambique | 1995 | 0.713228 | 0.598496 |
| 18 | Mozambique | 1996 | 0.714012 | 0.596174 |
| 19 | Mozambique | 1997 | 0.715332 | 0.594212 |
| 20 | Mozambique | 1997 | 0.715332 | 0.594212 |
| 21 | Mozambique | 1998 | 0.710254 | 0.587737 |
| 22 | Mozambique | 1999 | 0.702769 | 0.579659 |
| 23 | Mozambique | 1999 | 0.702769 | 0.579659 |
| 24 | Mozambique | 2000 | 0.692727 | 0.56899  |
| 25 | Mozambique | 2001 | 0.678268 | 0.555227 |
| 26 | Mozambique | 2002 | 0.669768 | 0.545593 |
| 27 | Mozambique | 2002 | 0.669768 | 0.545593 |
| 28 | Mozambique | 2003 | 0.664322 | 0.539428 |
| 29 | Mozambique | 2004 | 0.664309 | 0.538267 |
| 30 | Mozambique | 2005 | 0.67067  | 0.543276 |
| 31 | Mozambique | 2005 | 0.67067  | 0.543276 |
| 32 | Mozambique | 2006 | 0.666668 | 0.537137 |
| 33 | Mozambique | 2007 | 0.666481 | 0.536097 |
| 34 | Mozambique | 2008 | 0.66311  | 0.534174 |
| 35 | Mozambique | 2008 | 0.66311  | 0.534174 |
| 36 | Mozambique | 2009 | 0.663878 | 0.535535 |
| 37 | Mozambique | 2010 | 0.664697 | 0.536946 |
| 38 | Mozambique | 2010 | 0.664697 | 0.536946 |
| 39 |            |      |          |          |
| 40 |            |      |          |          |
| 41 |            |      |          |          |
| 42 |            |      |          |          |
| 43 |            |      |          |          |
| 44 |            |      |          |          |
| 45 |            |      |          |          |
| 46 |            |      |          |          |

|            |      |          |          |
|------------|------|----------|----------|
| Mozambique | 2011 | 0.665384 | 0.538654 |
| Mozambique | 2012 | 0.666639 | 0.540631 |
| Mozambique | 2013 | 0.667253 | 0.542927 |
| Mozambique | 2014 | 0.670594 | 0.547312 |
| Mozambique | 2015 | 0.676028 | 0.553124 |
| Mozambique | 2016 | 0.678167 | 0.557826 |
| Mozambique | 2017 | 0.68422  | 0.56494  |
| Mozambique | 2018 | 0.686623 | 0.567848 |
| Mozambique | 2019 | 0.689936 | 0.571072 |
| Myanmar    | 1990 | 1.18372  | 0.956469 |
| Myanmar    | 1991 | 1.186191 | 0.955607 |
| Myanmar    | 1992 | 1.19093  | 0.957006 |
| Myanmar    | 1993 | 1.194359 | 0.957396 |
| Myanmar    | 1994 | 1.1991   | 0.959002 |
| Myanmar    | 1995 | 1.201551 | 0.957968 |
| Myanmar    | 1996 | 1.201112 | 0.955698 |
| Myanmar    | 1997 | 1.200431 | 0.953416 |
| Myanmar    | 1998 | 1.201065 | 0.952161 |
| Myanmar    | 1999 | 1.200264 | 0.950136 |
| Myanmar    | 2000 | 1.205709 | 0.953426 |
| Myanmar    | 2001 | 1.200051 | 0.949125 |
| Myanmar    | 2002 | 1.197862 | 0.947276 |
| Myanmar    | 2003 | 1.20639  | 0.952919 |
| Myanmar    | 2004 | 1.192564 | 0.942485 |
| Myanmar    | 2005 | 1.178545 | 0.930368 |

1  
2  
3  
4  
5  
6  
7  
8  
9  
10  
11  
12  
13  
14  
15  
16  
17  
18  
19  
20  
21  
22  
23  
24  
25  
26  
27  
28  
29  
30  
31  
32  
33  
34  
35  
36  
37  
38  
39  
40  
41  
42  
43  
44  
45  
46

|         |      |          |          |
|---------|------|----------|----------|
| Myanmar | 2006 | 1.17357  | 0.924872 |
| Myanmar | 2007 | 1.161685 | 0.914034 |
| Myanmar | 2008 | 1.150781 | 0.9032   |
| Myanmar | 2009 | 1.127682 | 0.883668 |
| Myanmar | 2010 | 1.099544 | 0.859687 |
| Myanmar | 2011 | 1.071159 | 0.835402 |
| Myanmar | 2012 | 1.05088  | 0.816291 |
| Myanmar | 2013 | 1.050014 | 0.812047 |
| Myanmar | 2014 | 1.048675 | 0.807729 |
| Myanmar | 2015 | 1.048365 | 0.80387  |
| Myanmar | 2016 | 1.049722 | 0.801738 |
| Myanmar | 2017 | 1.060853 | 0.807818 |
| Myanmar | 2018 | 1.06684  | 0.8106   |
| Myanmar | 2019 | 1.070598 | 0.810062 |
| Namibia | 1990 | 0.520952 | 0.414139 |
| Namibia | 1991 | 0.518697 | 0.41023  |
| Namibia | 1992 | 0.514996 | 0.405404 |
| Namibia | 1993 | 0.516465 | 0.404232 |
| Namibia | 1994 | 0.514588 | 0.401503 |
| Namibia | 1995 | 0.514977 | 0.400811 |
| Namibia | 1996 | 0.512347 | 0.398035 |
| Namibia | 1997 | 0.520707 | 0.40232  |
| Namibia | 1998 | 0.528704 | 0.406669 |
| Namibia | 1999 | 0.536913 | 0.411569 |
| Namibia | 2000 | 0.542403 | 0.414466 |

|         |      |          |          |
|---------|------|----------|----------|
| Namibia | 2001 | 0.536134 | 0.40849  |
| Namibia | 2002 | 0.535634 | 0.406544 |
| Namibia | 2003 | 0.527334 | 0.398785 |
| Namibia | 2004 | 0.515515 | 0.38807  |
| Namibia | 2005 | 0.50934  | 0.380508 |
| Namibia | 2006 | 0.512883 | 0.379323 |
| Namibia | 2007 | 0.520243 | 0.380621 |
| Namibia | 2008 | 0.525957 | 0.380947 |
| Namibia | 2009 | 0.537255 | 0.385315 |
| Namibia | 2010 | 0.542963 | 0.386363 |
| Namibia | 2011 | 0.547274 | 0.385731 |
| Namibia | 2012 | 0.562226 | 0.393271 |
| Namibia | 2013 | 0.570154 | 0.396655 |
| Namibia | 2014 | 0.579949 | 0.402086 |
| Namibia | 2015 | 0.589423 | 0.407695 |
| Namibia | 2016 | 0.596258 | 0.411905 |
| Namibia | 2017 | 0.601077 | 0.414841 |
| Namibia | 2018 | 0.606703 | 0.418179 |
| Namibia | 2019 | 0.61335  | 0.422065 |
| Nauru   | 1990 | 0.841129 | 0.90935  |
| Nauru   | 1991 | 0.836849 | 0.90501  |
| Nauru   | 1992 | 0.838949 | 0.908351 |
| Nauru   | 1993 | 0.81655  | 0.888291 |
| Nauru   | 1994 | 0.827685 | 0.897083 |
| Nauru   | 1995 | 0.825315 | 0.892624 |

1  
2  
3  
4  
5  
6  
7  
8  
9  
10  
11  
12  
13  
14  
15  
16  
17  
18  
19  
20  
21  
22  
23  
24  
25  
26  
27  
28  
29  
30  
31  
32  
33  
34  
35  
36  
37  
38  
39  
40  
41  
42  
43  
44  
45  
46

|       |      |          |          |
|-------|------|----------|----------|
| Nauru | 1996 | 0.835952 | 0.896632 |
| Nauru | 1997 | 0.847038 | 0.900004 |
| Nauru | 1998 | 0.859692 | 0.901619 |
| Nauru | 1999 | 0.855559 | 0.887218 |
| Nauru | 2000 | 0.855925 | 0.875318 |
| Nauru | 2001 | 0.857772 | 0.863824 |
| Nauru | 2002 | 0.845386 | 0.844801 |
| Nauru | 2003 | 0.839563 | 0.830172 |
| Nauru | 2004 | 0.843791 | 0.82551  |
| Nauru | 2005 | 0.830454 | 0.805166 |
| Nauru | 2006 | 0.821763 | 0.78876  |
| Nauru | 2007 | 0.806174 | 0.767626 |
| Nauru | 2008 | 0.793628 | 0.750901 |
| Nauru | 2009 | 0.787585 | 0.740255 |
| Nauru | 2010 | 0.783428 | 0.733114 |
| Nauru | 2011 | 0.782513 | 0.727983 |
| Nauru | 2012 | 0.78002  | 0.722149 |
| Nauru | 2013 | 0.779317 | 0.718327 |
| Nauru | 2014 | 0.776438 | 0.713153 |
| Nauru | 2015 | 0.78012  | 0.712964 |
| Nauru | 2016 | 0.786155 | 0.71382  |
| Nauru | 2017 | 0.797984 | 0.719267 |
| Nauru | 2018 | 0.809922 | 0.723824 |
| Nauru | 2019 | 0.822037 | 0.727821 |
| Nepal | 1990 | 1.006487 | 0.88658  |

|       |      |          |          |
|-------|------|----------|----------|
| Nepal | 1991 | 1.008787 | 0.889125 |
| Nepal | 1992 | 1.017032 | 0.897647 |
| Nepal | 1993 | 1.009764 | 0.893959 |
| Nepal | 1994 | 0.999923 | 0.887975 |
| Nepal | 1995 | 0.980684 | 0.874587 |
| Nepal | 1996 | 0.960356 | 0.859834 |
| Nepal | 1997 | 0.932334 | 0.838205 |
| Nepal | 1998 | 0.9169   | 0.826599 |
| Nepal | 1999 | 0.913889 | 0.824936 |
| Nepal | 2000 | 0.891626 | 0.807733 |
| Nepal | 2001 | 0.885184 | 0.803387 |
| Nepal | 2002 | 0.88509  | 0.80353  |
| Nepal | 2003 | 0.886223 | 0.804379 |
| Nepal | 2004 | 0.88261  | 0.801964 |
| Nepal | 2005 | 0.88549  | 0.803022 |
| Nepal | 2006 | 0.885284 | 0.802625 |
| Nepal | 2007 | 0.895269 | 0.810404 |
| Nepal | 2008 | 0.906467 | 0.818901 |
| Nepal | 2009 | 0.920021 | 0.829422 |
| Nepal | 2010 | 0.946883 | 0.850073 |
| Nepal | 2011 | 0.956762 | 0.857514 |
| Nepal | 2012 | 0.976914 | 0.871798 |
| Nepal | 2013 | 0.994293 | 0.883126 |
| Nepal | 2014 | 1.016476 | 0.898038 |
| Nepal | 2015 | 1.035396 | 0.907818 |



|             |      |          |          |
|-------------|------|----------|----------|
| Nepal       | 2016 | 1.049671 | 0.914186 |
| Nepal       | 2017 | 1.063584 | 0.920054 |
| Nepal       | 2018 | 1.076166 | 0.92446  |
| Nepal       | 2019 | 1.087308 | 0.926945 |
| Netherlands | 1990 | 1.447557 | 0.744821 |
| Netherlands | 1991 | 1.476313 | 0.748788 |
| Netherlands | 1992 | 1.479029 | 0.741339 |
| Netherlands | 1993 | 1.466228 | 0.727559 |
| Netherlands | 1994 | 1.509769 | 0.744292 |
| Netherlands | 1995 | 1.525182 | 0.750735 |
| Netherlands | 1996 | 1.511319 | 0.746839 |
| Netherlands | 1997 | 1.502871 | 0.745412 |
| Netherlands | 1998 | 1.468095 | 0.728972 |
| Netherlands | 1999 | 1.439072 | 0.71541  |
| Netherlands | 2000 | 1.39814  | 0.697868 |
| Netherlands | 2001 | 1.413555 | 0.709338 |
| Netherlands | 2002 | 1.425754 | 0.719386 |
| Netherlands | 2003 | 1.388924 | 0.704545 |
| Netherlands | 2004 | 1.400944 | 0.709384 |
| Netherlands | 2005 | 1.401287 | 0.709922 |
| Netherlands | 2006 | 1.401839 | 0.710847 |
| Netherlands | 2007 | 1.402669 | 0.714385 |
| Netherlands | 2008 | 1.406942 | 0.72216  |
| Netherlands | 2009 | 1.40736  | 0.727049 |
| Netherlands | 2010 | 1.421272 | 0.736793 |

|    |             |      |          |          |
|----|-------------|------|----------|----------|
| 1  |             |      |          |          |
| 2  |             |      |          |          |
| 3  |             |      |          |          |
| 4  |             |      |          |          |
| 5  | Netherlands | 2011 | 1.446806 | 0.757099 |
| 6  | Netherlands | 2012 | 1.442136 | 0.762483 |
| 7  | Netherlands | 2013 | 1.430792 | 0.767487 |
| 8  | Netherlands | 2014 | 1.440957 | 0.786282 |
| 9  | Netherlands | 2015 | 1.412873 | 0.785196 |
| 10 | Netherlands | 2016 | 1.402363 | 0.791495 |
| 11 | Netherlands | 2017 | 1.364227 | 0.786008 |
| 12 | Netherlands | 2018 | 1.345275 | 0.792336 |
| 13 | Netherlands | 2019 | 1.31752  | 0.791067 |
| 14 | Netherlands | 2019 | 1.31752  | 0.791067 |
| 15 | Netherlands | 2019 | 1.31752  | 0.791067 |
| 16 | Netherlands | 2019 | 1.31752  | 0.791067 |
| 17 | New Zealand | 1990 | 1.066192 | 0.705987 |
| 18 | New Zealand | 1991 | 1.063794 | 0.698293 |
| 19 | New Zealand | 1992 | 0.993804 | 0.647648 |
| 20 | New Zealand | 1993 | 0.990158 | 0.641685 |
| 21 | New Zealand | 1994 | 0.975831 | 0.628564 |
| 22 | New Zealand | 1995 | 0.987665 | 0.632708 |
| 23 | New Zealand | 1996 | 1.006324 | 0.639629 |
| 24 | New Zealand | 1997 | 0.977481 | 0.622835 |
| 25 | New Zealand | 1998 | 0.981552 | 0.627138 |
| 26 | New Zealand | 1999 | 0.975372 | 0.624972 |
| 27 | New Zealand | 2000 | 0.962181 | 0.62377  |
| 28 | New Zealand | 2001 | 0.943874 | 0.613128 |
| 29 | New Zealand | 2002 | 0.97546  | 0.637451 |
| 30 | New Zealand | 2003 | 0.971302 | 0.637979 |
| 31 | New Zealand | 2004 | 0.993113 | 0.655944 |
| 32 | New Zealand | 2005 | 0.992803 | 0.66123  |
| 33 | New Zealand | 2005 | 0.992803 | 0.66123  |
| 34 | New Zealand | 2005 | 0.992803 | 0.66123  |
| 35 | New Zealand | 2005 | 0.992803 | 0.66123  |
| 36 | New Zealand | 2005 | 0.992803 | 0.66123  |
| 37 | New Zealand | 2005 | 0.992803 | 0.66123  |
| 38 | New Zealand | 2005 | 0.992803 | 0.66123  |
| 39 |             |      |          |          |
| 40 |             |      |          |          |
| 41 |             |      |          |          |
| 42 |             |      |          |          |
| 43 |             |      |          |          |
| 44 |             |      |          |          |
| 45 |             |      |          |          |
| 46 |             |      |          |          |

|    |             |      |          |          |
|----|-------------|------|----------|----------|
| 1  |             |      |          |          |
| 2  |             |      |          |          |
| 3  |             |      |          |          |
| 4  |             |      |          |          |
| 5  | New Zealand | 2006 | 0.984374 | 0.661881 |
| 6  | New Zealand | 2007 | 0.956275 | 0.65261  |
| 7  | New Zealand | 2008 | 0.960295 | 0.664472 |
| 8  | New Zealand | 2009 | 0.944662 | 0.656956 |
| 9  | New Zealand | 2010 | 0.959474 | 0.671581 |
| 10 | New Zealand | 2011 | 0.954743 | 0.674297 |
| 11 | New Zealand | 2012 | 0.930048 | 0.664193 |
| 12 | New Zealand | 2013 | 0.924215 | 0.667159 |
| 13 | New Zealand | 2014 | 0.91942  | 0.665934 |
| 14 | New Zealand | 2015 | 0.941312 | 0.687821 |
| 15 | New Zealand | 2016 | 0.929588 | 0.68481  |
| 16 | New Zealand | 2017 | 0.927328 | 0.689256 |
| 17 | New Zealand | 2018 | 0.893293 | 0.670898 |
| 18 | New Zealand | 2019 | 0.881984 | 0.667259 |
| 19 | Nicaragua   | 1990 | 0.522688 | 0.397753 |
| 20 | Nicaragua   | 1991 | 0.514671 | 0.395575 |
| 21 | Nicaragua   | 1992 | 0.515144 | 0.395474 |
| 22 | Nicaragua   | 1993 | 0.52376  | 0.401308 |
| 23 | Nicaragua   | 1994 | 0.495389 | 0.382344 |
| 24 | Nicaragua   | 1995 | 0.657199 | 0.544353 |
| 25 | Nicaragua   | 1996 | 0.644636 | 0.542242 |
| 26 | Nicaragua   | 1997 | 0.630431 | 0.535664 |
| 27 | Nicaragua   | 1998 | 0.618795 | 0.531651 |
| 28 | Nicaragua   | 1999 | 0.572153 | 0.497733 |
| 29 | Nicaragua   | 2000 | 0.578434 | 0.508295 |
| 30 |             |      |          |          |
| 31 |             |      |          |          |
| 32 |             |      |          |          |
| 33 |             |      |          |          |
| 34 |             |      |          |          |
| 35 |             |      |          |          |
| 36 |             |      |          |          |
| 37 |             |      |          |          |
| 38 |             |      |          |          |
| 39 |             |      |          |          |
| 40 |             |      |          |          |
| 41 |             |      |          |          |
| 42 |             |      |          |          |
| 43 |             |      |          |          |
| 44 |             |      |          |          |
| 45 |             |      |          |          |
| 46 |             |      |          |          |

|           |      |          |          |
|-----------|------|----------|----------|
| Nicaragua | 2001 | 0.593106 | 0.527615 |
| Nicaragua | 2002 | 0.583986 | 0.525227 |
| Nicaragua | 2003 | 0.551447 | 0.49958  |
| Nicaragua | 2004 | 0.557455 | 0.50602  |
| Nicaragua | 2005 | 0.538036 | 0.48986  |
| Nicaragua | 2006 | 0.52597  | 0.477105 |
| Nicaragua | 2007 | 0.544361 | 0.49303  |
| Nicaragua | 2008 | 0.539564 | 0.48876  |
| Nicaragua | 2009 | 0.545132 | 0.49153  |
| Nicaragua | 2010 | 0.550934 | 0.493435 |
| Nicaragua | 2011 | 0.535405 | 0.477532 |
| Nicaragua | 2012 | 0.522062 | 0.46299  |
| Nicaragua | 2013 | 0.524102 | 0.460842 |
| Nicaragua | 2014 | 0.537312 | 0.467204 |
| Nicaragua | 2015 | 0.557047 | 0.479269 |
| Nicaragua | 2016 | 0.541955 | 0.463483 |
| Nicaragua | 2017 | 0.558139 | 0.471183 |
| Nicaragua | 2018 | 0.560598 | 0.468403 |
| Nicaragua | 2019 | 0.562831 | 0.466458 |
| Niger     | 1990 | 0.810415 | 0.758079 |
| Niger     | 1991 | 0.826226 | 0.773965 |
| Niger     | 1992 | 0.838852 | 0.788117 |
| Niger     | 1993 | 0.845358 | 0.798159 |
| Niger     | 1994 | 0.855762 | 0.808671 |
| Niger     | 1995 | 0.860737 | 0.809156 |

1  
2  
3  
4  
5  
6  
7  
8  
9  
10  
11  
12  
13  
14  
15  
16  
17  
18  
19  
20  
21  
22  
23  
24  
25  
26  
27  
28  
29  
30  
31  
32  
33  
34  
35  
36  
37  
38  
39  
40  
41  
42  
43  
44  
45  
46

|         |      |          |          |
|---------|------|----------|----------|
| Niger   | 1996 | 0.856771 | 0.807281 |
| Niger   | 1997 | 0.855472 | 0.806414 |
| Niger   | 1998 | 0.843432 | 0.798485 |
| Niger   | 1999 | 0.828745 | 0.782915 |
| Niger   | 2000 | 0.819592 | 0.771369 |
| Niger   | 2001 | 0.806746 | 0.759651 |
| Niger   | 2002 | 0.797001 | 0.752312 |
| Niger   | 2003 | 0.787058 | 0.746425 |
| Niger   | 2004 | 0.775544 | 0.739366 |
| Niger   | 2005 | 0.766949 | 0.727909 |
| Niger   | 2006 | 0.756655 | 0.71908  |
| Niger   | 2007 | 0.750941 | 0.711134 |
| Niger   | 2008 | 0.743702 | 0.704064 |
| Niger   | 2009 | 0.735897 | 0.69378  |
| Niger   | 2010 | 0.727739 | 0.684338 |
| Niger   | 2011 | 0.726785 | 0.678833 |
| Niger   | 2012 | 0.724445 | 0.674636 |
| Niger   | 2013 | 0.718303 | 0.669687 |
| Niger   | 2014 | 0.722409 | 0.67305  |
| Niger   | 2015 | 0.724784 | 0.671592 |
| Niger   | 2016 | 0.724831 | 0.672213 |
| Niger   | 2017 | 0.726952 | 0.673326 |
| Niger   | 2018 | 0.721766 | 0.673434 |
| Niger   | 2019 | 0.724118 | 0.675679 |
| Nigeria | 1990 | 0.942702 | 0.872561 |

|    |         |      |          |          |
|----|---------|------|----------|----------|
| 1  |         |      |          |          |
| 2  |         |      |          |          |
| 3  |         |      |          |          |
| 4  |         |      |          |          |
| 5  | Nigeria | 1991 | 0.934436 | 0.872282 |
| 6  | Nigeria | 1992 | 0.924894 | 0.872943 |
| 7  | Nigeria | 1993 | 0.914077 | 0.870767 |
| 8  | Nigeria | 1994 | 0.906826 | 0.871447 |
| 9  | Nigeria | 1995 | 0.895881 | 0.866064 |
| 10 | Nigeria | 1996 | 0.885105 | 0.861683 |
| 11 | Nigeria | 1997 | 0.881762 | 0.864812 |
| 12 | Nigeria | 1998 | 0.87083  | 0.860374 |
| 13 | Nigeria | 1999 | 0.852298 | 0.847813 |
| 14 | Nigeria | 2000 | 0.834291 | 0.834275 |
| 15 | Nigeria | 2001 | 0.819429 | 0.824864 |
| 16 | Nigeria | 2002 | 0.807634 | 0.81888  |
| 17 | Nigeria | 2003 | 0.793461 | 0.811085 |
| 18 | Nigeria | 2004 | 0.783844 | 0.806558 |
| 19 | Nigeria | 2005 | 0.771572 | 0.797225 |
| 20 | Nigeria | 2006 | 0.765569 | 0.792637 |
| 21 | Nigeria | 2007 | 0.759324 | 0.78688  |
| 22 | Nigeria | 2008 | 0.75287  | 0.779753 |
| 23 | Nigeria | 2009 | 0.745507 | 0.769981 |
| 24 | Nigeria | 2010 | 0.736712 | 0.759652 |
| 25 | Nigeria | 2011 | 0.734046 | 0.753786 |
| 26 | Nigeria | 2012 | 0.737838 | 0.751281 |
| 27 | Nigeria | 2013 | 0.734996 | 0.740608 |
| 28 | Nigeria | 2014 | 0.742661 | 0.740121 |
| 29 | Nigeria | 2015 | 0.754025 | 0.743835 |
| 30 |         |      |          |          |
| 31 |         |      |          |          |
| 32 |         |      |          |          |
| 33 |         |      |          |          |
| 34 |         |      |          |          |
| 35 |         |      |          |          |
| 36 |         |      |          |          |
| 37 |         |      |          |          |
| 38 |         |      |          |          |
| 39 |         |      |          |          |
| 40 |         |      |          |          |
| 41 |         |      |          |          |
| 42 |         |      |          |          |
| 43 |         |      |          |          |
| 44 |         |      |          |          |
| 45 |         |      |          |          |
| 46 |         |      |          |          |

|    |         |      |          |          |
|----|---------|------|----------|----------|
| 1  |         |      |          |          |
| 2  |         |      |          |          |
| 3  |         |      |          |          |
| 4  |         |      |          |          |
| 5  | Nigeria | 2016 | 0.763335 | 0.745167 |
| 6  | Nigeria | 2017 | 0.778616 | 0.75156  |
| 7  | Nigeria | 2018 | 0.793522 | 0.757511 |
| 8  | Nigeria | 2019 | 0.810217 | 0.764132 |
| 9  | Niue    | 1990 | 1.190231 | 0.775411 |
| 10 | Niue    | 1991 | 1.194033 | 0.789915 |
| 11 | Niue    | 1992 | 1.207319 | 0.812242 |
| 12 | Niue    | 1993 | 1.20373  | 0.823011 |
| 13 | Niue    | 1994 | 1.178585 | 0.817084 |
| 14 | Niue    | 1995 | 1.157887 | 0.813367 |
| 15 | Niue    | 1996 | 1.143385 | 0.814647 |
| 16 | Niue    | 1997 | 1.133241 | 0.820008 |
| 17 | Niue    | 1998 | 1.099876 | 0.807742 |
| 18 | Niue    | 1999 | 1.073953 | 0.798718 |
| 19 | Niue    | 2000 | 1.048715 | 0.788429 |
| 20 | Niue    | 2001 | 1.012068 | 0.767538 |
| 21 | Niue    | 2002 | 1.005777 | 0.76615  |
| 22 | Niue    | 2003 | 0.992871 | 0.757578 |
| 23 | Niue    | 2004 | 1.011142 | 0.772571 |
| 24 | Niue    | 2005 | 0.978883 | 0.747352 |
| 25 | Niue    | 2006 | 0.972596 | 0.743419 |
| 26 | Niue    | 2007 | 0.95894  | 0.733977 |
| 27 | Niue    | 2008 | 0.95539  | 0.73326  |
| 28 | Niue    | 2009 | 0.939876 | 0.721684 |
| 29 | Niue    | 2010 | 0.926776 | 0.71016  |
| 30 |         |      |          |          |
| 31 |         |      |          |          |
| 32 |         |      |          |          |
| 33 |         |      |          |          |
| 34 |         |      |          |          |
| 35 |         |      |          |          |
| 36 |         |      |          |          |
| 37 |         |      |          |          |
| 38 |         |      |          |          |
| 39 |         |      |          |          |
| 40 |         |      |          |          |
| 41 |         |      |          |          |
| 42 |         |      |          |          |
| 43 |         |      |          |          |
| 44 |         |      |          |          |
| 45 |         |      |          |          |
| 46 |         |      |          |          |

|                 |      |          |          |
|-----------------|------|----------|----------|
| Niue            | 2011 | 0.91639  | 0.701185 |
| Niue            | 2012 | 0.907389 | 0.69404  |
| Niue            | 2013 | 0.901788 | 0.689627 |
| Niue            | 2014 | 0.895694 | 0.683761 |
| Niue            | 2015 | 0.894766 | 0.680007 |
| Niue            | 2016 | 0.892505 | 0.676161 |
| Niue            | 2017 | 0.893889 | 0.676244 |
| Niue            | 2018 | 0.890768 | 0.674944 |
| Niue            | 2019 | 0.887772 | 0.673264 |
| North Macedonia | 1990 | 0.680204 | 0.58975  |
| North Macedonia | 1991 | 0.68378  | 0.5956   |
| North Macedonia | 1992 | 0.664624 | 0.571964 |
| North Macedonia | 1993 | 0.644703 | 0.547151 |
| North Macedonia | 1994 | 0.663149 | 0.555907 |
| North Macedonia | 1995 | 0.671096 | 0.552266 |
| North Macedonia | 1996 | 0.695813 | 0.563928 |
| North Macedonia | 1997 | 0.741597 | 0.594207 |
| North Macedonia | 1998 | 0.771646 | 0.617339 |
| North Macedonia | 1999 | 0.777685 | 0.616422 |
| North Macedonia | 2000 | 0.797954 | 0.622484 |
| North Macedonia | 2001 | 0.778443 | 0.606375 |
| North Macedonia | 2002 | 0.749492 | 0.587121 |
| North Macedonia | 2003 | 0.769429 | 0.60026  |
| North Macedonia | 2004 | 0.792515 | 0.614197 |
| North Macedonia | 2005 | 0.783544 | 0.610202 |



|    |                          |      |          |          |
|----|--------------------------|------|----------|----------|
| 1  |                          |      |          |          |
| 2  |                          |      |          |          |
| 3  |                          |      |          |          |
| 4  |                          |      |          |          |
| 5  | North Macedonia          | 2006 | 0.767706 | 0.60037  |
| 6  | North Macedonia          | 2007 | 0.791232 | 0.612007 |
| 7  | North Macedonia          | 2008 | 0.790856 | 0.612737 |
| 8  | North Macedonia          | 2009 | 0.763725 | 0.598462 |
| 9  | North Macedonia          | 2010 | 0.778915 | 0.614822 |
| 10 | North Macedonia          | 2011 | 0.793147 | 0.637721 |
| 11 | North Macedonia          | 2012 | 0.811289 | 0.66772  |
| 12 | North Macedonia          | 2013 | 0.780544 | 0.642134 |
| 13 | North Macedonia          | 2014 | 0.776893 | 0.636497 |
| 14 | North Macedonia          | 2015 | 0.799244 | 0.654666 |
| 15 | North Macedonia          | 2016 | 0.786323 | 0.643621 |
| 16 | North Macedonia          | 2017 | 0.788026 | 0.643868 |
| 17 | North Macedonia          | 2018 | 0.795756 | 0.652467 |
| 18 | North Macedonia          | 2019 | 0.797522 | 0.654678 |
| 19 | Northern Mariana Islands | 1990 | 0.904061 | 1.155126 |
| 20 | Northern Mariana Islands | 1991 | 0.908144 | 1.156065 |
| 21 | Northern Mariana Islands | 1992 | 0.940581 | 1.169589 |
| 22 | Northern Mariana Islands | 1993 | 0.975433 | 1.173898 |
| 23 | Northern Mariana Islands | 1994 | 1.002007 | 1.17191  |
| 24 | Northern Mariana Islands | 1995 | 1.003151 | 1.154852 |
| 25 | Northern Mariana Islands | 1996 | 0.987202 | 1.126734 |
| 26 | Northern Mariana Islands | 1997 | 0.968009 | 1.097328 |
| 27 | Northern Mariana Islands | 1998 | 0.947527 | 1.065921 |
| 28 | Northern Mariana Islands | 1999 | 0.959593 | 1.066621 |
| 29 | Northern Mariana Islands | 2000 | 0.952837 | 1.060532 |
| 30 |                          |      |          |          |
| 31 |                          |      |          |          |
| 32 |                          |      |          |          |
| 33 |                          |      |          |          |
| 34 |                          |      |          |          |
| 35 |                          |      |          |          |
| 36 |                          |      |          |          |
| 37 |                          |      |          |          |
| 38 |                          |      |          |          |
| 39 |                          |      |          |          |
| 40 |                          |      |          |          |
| 41 |                          |      |          |          |
| 42 |                          |      |          |          |
| 43 |                          |      |          |          |
| 44 |                          |      |          |          |
| 45 |                          |      |          |          |
| 46 |                          |      |          |          |

|                          |      |          |          |
|--------------------------|------|----------|----------|
| Northern Mariana Islands | 2001 | 0.991994 | 1.099375 |
| Northern Mariana Islands | 2002 | 0.987834 | 1.094556 |
| Northern Mariana Islands | 2003 | 0.979144 | 1.077003 |
| Northern Mariana Islands | 2004 | 0.978766 | 1.061672 |
| Northern Mariana Islands | 2005 | 0.955494 | 1.027025 |
| Northern Mariana Islands | 2006 | 0.935982 | 1.000809 |
| Northern Mariana Islands | 2007 | 0.897664 | 0.960032 |
| Northern Mariana Islands | 2008 | 0.864887 | 0.927883 |
| Northern Mariana Islands | 2009 | 0.838403 | 0.903614 |
| Northern Mariana Islands | 2010 | 0.815518 | 0.876638 |
| Northern Mariana Islands | 2011 | 0.817938 | 0.865424 |
| Northern Mariana Islands | 2012 | 0.827228 | 0.851935 |
| Northern Mariana Islands | 2013 | 0.852758 | 0.850358 |
| Northern Mariana Islands | 2014 | 0.875267 | 0.849207 |
| Northern Mariana Islands | 2015 | 0.888178 | 0.851222 |
| Northern Mariana Islands | 2016 | 0.885488 | 0.844042 |
| Northern Mariana Islands | 2017 | 0.888524 | 0.842979 |
| Northern Mariana Islands | 2018 | 0.887991 | 0.841535 |
| Northern Mariana Islands | 2019 | 0.885281 | 0.840043 |
| Norway                   | 1990 | 0.75453  | 0.444114 |
| Norway                   | 1991 | 0.76261  | 0.443497 |
| Norway                   | 1992 | 0.753197 | 0.43253  |
| Norway                   | 1993 | 0.762236 | 0.431351 |
| Norway                   | 1994 | 0.781039 | 0.438624 |
| Norway                   | 1995 | 0.763202 | 0.424597 |

|        |      |          |          |
|--------|------|----------|----------|
| Norway | 1996 | 0.758874 | 0.419658 |
| Norway | 1997 | 0.75473  | 0.412952 |
| Norway | 1998 | 0.774382 | 0.420472 |
| Norway | 1999 | 0.804349 | 0.433843 |
| Norway | 2000 | 0.825601 | 0.441517 |
| Norway | 2001 | 0.853106 | 0.453431 |
| Norway | 2002 | 0.867374 | 0.459636 |
| Norway | 2003 | 0.880328 | 0.464835 |
| Norway | 2004 | 0.889531 | 0.470566 |
| Norway | 2005 | 0.89659  | 0.476656 |
| Norway | 2006 | 0.922606 | 0.490047 |
| Norway | 2007 | 0.907665 | 0.483353 |
| Norway | 2008 | 0.911053 | 0.485221 |
| Norway | 2009 | 0.928439 | 0.497259 |
| Norway | 2010 | 0.935386 | 0.504449 |
| Norway | 2011 | 0.92996  | 0.505624 |
| Norway | 2012 | 0.945872 | 0.517948 |
| Norway | 2013 | 0.94377  | 0.523526 |
| Norway | 2014 | 0.921463 | 0.517737 |
| Norway | 2015 | 0.916327 | 0.521282 |
| Norway | 2016 | 0.921739 | 0.532769 |
| Norway | 2017 | 0.936924 | 0.549344 |
| Norway | 2018 | 0.918215 | 0.550188 |
| Norway | 2019 | 0.878137 | 0.537045 |
| Oman   | 1990 | 0.979395 | 0.855588 |

|      |      |          |          |
|------|------|----------|----------|
| Oman | 1991 | 0.973416 | 0.875397 |
| Oman | 1992 | 0.949128 | 0.87044  |
| Oman | 1993 | 0.928445 | 0.864161 |
| Oman | 1994 | 0.918156 | 0.861888 |
| Oman | 1995 | 0.904759 | 0.858133 |
| Oman | 1996 | 0.87801  | 0.851048 |
| Oman | 1997 | 0.854061 | 0.839597 |
| Oman | 1998 | 0.840761 | 0.832031 |
| Oman | 1999 | 0.837351 | 0.831819 |
| Oman | 2000 | 0.834719 | 0.835971 |
| Oman | 2001 | 0.827618 | 0.842637 |
| Oman | 2002 | 0.836788 | 0.865047 |
| Oman | 2003 | 0.845547 | 0.873422 |
| Oman | 2004 | 0.855899 | 0.869597 |
| Oman | 2005 | 0.876488 | 0.894328 |
| Oman | 2006 | 0.881398 | 0.931667 |
| Oman | 2007 | 0.83088  | 0.881098 |
| Oman | 2008 | 0.794738 | 0.829971 |
| Oman | 2009 | 0.813201 | 0.848894 |
| Oman | 2010 | 0.846076 | 0.885023 |
| Oman | 2011 | 0.828041 | 0.880499 |
| Oman | 2012 | 0.795644 | 0.823064 |
| Oman | 2013 | 0.786745 | 0.844324 |
| Oman | 2014 | 0.832188 | 0.90246  |
| Oman | 2015 | 0.831518 | 0.871769 |

1  
2  
3  
4  
5  
6  
7  
8  
9  
10  
11  
12  
13  
14  
15  
16  
17  
18  
19  
20  
21  
22  
23  
24  
25  
26  
27  
28  
29  
30  
31  
32  
33  
34  
35  
36  
37  
38  
39  
40  
41  
42  
43  
44  
45  
46

|          |      |          |          |
|----------|------|----------|----------|
| Oman     | 2016 | 0.822027 | 0.839947 |
| Oman     | 2017 | 0.850428 | 0.847046 |
| Oman     | 2018 | 0.903009 | 0.894798 |
| Oman     | 2019 | 0.928841 | 0.907248 |
| Pakistan | 1990 | 0.769579 | 0.859356 |
| Pakistan | 1991 | 0.77647  | 0.861193 |
| Pakistan | 1992 | 0.790828 | 0.870807 |
| Pakistan | 1993 | 0.795747 | 0.870075 |
| Pakistan | 1994 | 0.805727 | 0.87484  |
| Pakistan | 1995 | 0.818759 | 0.883548 |
| Pakistan | 1996 | 0.825433 | 0.884969 |
| Pakistan | 1997 | 0.83398  | 0.887684 |
| Pakistan | 1998 | 0.842863 | 0.891115 |
| Pakistan | 1999 | 0.855256 | 0.899086 |
| Pakistan | 2000 | 0.86957  | 0.91118  |
| Pakistan | 2001 | 0.872852 | 0.911187 |
| Pakistan | 2002 | 0.871058 | 0.904883 |
| Pakistan | 2003 | 0.880193 | 0.910245 |
| Pakistan | 2004 | 0.877101 | 0.904079 |
| Pakistan | 2005 | 0.872892 | 0.897924 |
| Pakistan | 2006 | 0.872655 | 0.894325 |
| Pakistan | 2007 | 0.872149 | 0.891288 |
| Pakistan | 2008 | 0.875317 | 0.890402 |
| Pakistan | 2009 | 0.878341 | 0.890376 |
| Pakistan | 2010 | 0.878473 | 0.888904 |

|    |          |      |          |          |
|----|----------|------|----------|----------|
| 1  |          |      |          |          |
| 2  |          |      |          |          |
| 3  |          |      |          |          |
| 4  |          |      |          |          |
| 5  | Pakistan | 2011 | 0.877758 | 0.884423 |
| 6  | Pakistan | 2012 | 0.873696 | 0.878442 |
| 7  | Pakistan | 2013 | 0.883067 | 0.885333 |
| 8  | Pakistan | 2014 | 0.882844 | 0.883889 |
| 9  | Pakistan | 2015 | 0.881913 | 0.881605 |
| 10 | Pakistan | 2016 | 0.881354 | 0.879779 |
| 11 | Pakistan | 2017 | 0.883992 | 0.881982 |
| 12 | Pakistan | 2018 | 0.88619  | 0.884133 |
| 13 | Pakistan | 2019 | 0.889084 | 0.887167 |
| 14 | Palau    | 1990 | 0.590726 | 0.567074 |
| 15 | Palau    | 1991 | 0.592484 | 0.570484 |
| 16 | Palau    | 1992 | 0.597138 | 0.577494 |
| 17 | Palau    | 1993 | 0.598439 | 0.583652 |
| 18 | Palau    | 1994 | 0.607683 | 0.594125 |
| 19 | Palau    | 1995 | 0.602122 | 0.598155 |
| 20 | Palau    | 1996 | 0.594922 | 0.602471 |
| 21 | Palau    | 1997 | 0.583794 | 0.605164 |
| 22 | Palau    | 1998 | 0.569959 | 0.607432 |
| 23 | Palau    | 1999 | 0.552715 | 0.606219 |
| 24 | Palau    | 2000 | 0.535765 | 0.600872 |
| 25 | Palau    | 2001 | 0.527349 | 0.594391 |
| 26 | Palau    | 2002 | 0.528002 | 0.591384 |
| 27 | Palau    | 2003 | 0.527773 | 0.584654 |
| 28 | Palau    | 2004 | 0.551456 | 0.599923 |
| 29 | Palau    | 2005 | 0.561114 | 0.60323  |
| 30 |          |      |          |          |
| 31 |          |      |          |          |
| 32 |          |      |          |          |
| 33 |          |      |          |          |
| 34 |          |      |          |          |
| 35 |          |      |          |          |
| 36 |          |      |          |          |
| 37 |          |      |          |          |
| 38 |          |      |          |          |
| 39 |          |      |          |          |
| 40 |          |      |          |          |
| 41 |          |      |          |          |
| 42 |          |      |          |          |
| 43 |          |      |          |          |
| 44 |          |      |          |          |
| 45 |          |      |          |          |
| 46 |          |      |          |          |

1  
2  
3  
4  
5  
6  
7  
8  
9  
10  
11  
12  
13  
14  
15  
16  
17  
18  
19  
20  
21  
22  
23  
24  
25  
26  
27  
28  
29  
30  
31  
32  
33  
34  
35  
36  
37  
38  
39  
40  
41  
42  
43  
44  
45  
46

|           |      |          |          |
|-----------|------|----------|----------|
| Palau     | 2006 | 0.560422 | 0.591128 |
| Palau     | 2007 | 0.553735 | 0.574366 |
| Palau     | 2008 | 0.548002 | 0.561176 |
| Palau     | 2009 | 0.544165 | 0.552275 |
| Palau     | 2010 | 0.540527 | 0.545934 |
| Palau     | 2011 | 0.537092 | 0.540225 |
| Palau     | 2012 | 0.533922 | 0.535625 |
| Palau     | 2013 | 0.533608 | 0.534197 |
| Palau     | 2014 | 0.531007 | 0.530978 |
| Palau     | 2015 | 0.529723 | 0.529574 |
| Palau     | 2016 | 0.529932 | 0.529197 |
| Palau     | 2017 | 0.533105 | 0.531537 |
| Palau     | 2018 | 0.535611 | 0.532533 |
| Palau     | 2019 | 0.538439 | 0.532765 |
| Palestine | 1990 | 1.096766 | 0.844508 |
| Palestine | 1991 | 1.091591 | 0.837304 |
| Palestine | 1992 | 1.084402 | 0.829288 |
| Palestine | 1993 | 1.079099 | 0.822787 |
| Palestine | 1994 | 1.078678 | 0.820767 |
| Palestine | 1995 | 1.07913  | 0.819914 |
| Palestine | 1996 | 1.078497 | 0.818714 |
| Palestine | 1997 | 1.046346 | 0.793599 |
| Palestine | 1998 | 1.00854  | 0.764127 |
| Palestine | 1999 | 0.968609 | 0.734114 |
| Palestine | 2000 | 0.941176 | 0.712675 |

|           |      |          |          |
|-----------|------|----------|----------|
| Palestine | 2001 | 0.911024 | 0.687406 |
| Palestine | 2002 | 0.883868 | 0.663667 |
| Palestine | 2003 | 0.868165 | 0.64945  |
| Palestine | 2004 | 0.866073 | 0.644743 |
| Palestine | 2005 | 0.862481 | 0.641533 |
| Palestine | 2006 | 0.86778  | 0.645021 |
| Palestine | 2007 | 0.888549 | 0.660241 |
| Palestine | 2008 | 0.918877 | 0.687188 |
| Palestine | 2009 | 0.938756 | 0.70351  |
| Palestine | 2010 | 0.97194  | 0.724081 |
| Palestine | 2011 | 0.972628 | 0.724938 |
| Palestine | 2012 | 0.957763 | 0.721228 |
| Palestine | 2013 | 0.962405 | 0.732859 |
| Palestine | 2014 | 0.945347 | 0.721619 |
| Palestine | 2015 | 0.981757 | 0.74991  |
| Palestine | 2016 | 1.030033 | 0.788183 |
| Palestine | 2017 | 1.031354 | 0.790637 |
| Palestine | 2018 | 1.009338 | 0.781943 |
| Palestine | 2019 | 1.007945 | 0.795501 |
| Panama    | 1990 | 0.684806 | 0.673883 |
| Panama    | 1991 | 0.662354 | 0.648572 |
| Panama    | 1992 | 0.682867 | 0.663984 |
| Panama    | 1993 | 0.622521 | 0.60272  |
| Panama    | 1994 | 0.632837 | 0.60781  |
| Panama    | 1995 | 0.609146 | 0.578484 |



|                  |      |          |          |
|------------------|------|----------|----------|
| Panama           | 1996 | 0.649564 | 0.611483 |
| Panama           | 1997 | 0.695155 | 0.650684 |
| Panama           | 1998 | 0.755965 | 0.707313 |
| Panama           | 1999 | 0.726618 | 0.67976  |
| Panama           | 2000 | 0.755907 | 0.704044 |
| Panama           | 2001 | 0.753036 | 0.698864 |
| Panama           | 2002 | 0.744099 | 0.687659 |
| Panama           | 2003 | 0.745748 | 0.685298 |
| Panama           | 2004 | 0.776886 | 0.713745 |
| Panama           | 2005 | 0.74812  | 0.688865 |
| Panama           | 2006 | 0.721141 | 0.662738 |
| Panama           | 2007 | 0.704199 | 0.645755 |
| Panama           | 2008 | 0.673904 | 0.615725 |
| Panama           | 2009 | 0.672603 | 0.61248  |
| Panama           | 2010 | 0.660371 | 0.597237 |
| Panama           | 2011 | 0.680747 | 0.613704 |
| Panama           | 2012 | 0.671265 | 0.603026 |
| Panama           | 2013 | 0.709723 | 0.637278 |
| Panama           | 2014 | 0.703626 | 0.631    |
| Panama           | 2015 | 0.696567 | 0.623082 |
| Panama           | 2016 | 0.695587 | 0.620452 |
| Panama           | 2017 | 0.686796 | 0.611485 |
| Panama           | 2018 | 0.70711  | 0.629843 |
| Panama           | 2019 | 0.702706 | 0.625932 |
| Papua New Guinea | 1990 | 0.510353 | 0.520489 |

|                  |      |          |          |
|------------------|------|----------|----------|
| Papua New Guinea | 1991 | 0.507586 | 0.517922 |
| Papua New Guinea | 1992 | 0.507342 | 0.516734 |
| Papua New Guinea | 1993 | 0.505816 | 0.514488 |
| Papua New Guinea | 1994 | 0.504687 | 0.513087 |
| Papua New Guinea | 1995 | 0.503742 | 0.512226 |
| Papua New Guinea | 1996 | 0.507201 | 0.51616  |
| Papua New Guinea | 1997 | 0.510876 | 0.518938 |
| Papua New Guinea | 1998 | 0.51547  | 0.522528 |
| Papua New Guinea | 1999 | 0.518813 | 0.525667 |
| Papua New Guinea | 2000 | 0.520481 | 0.527957 |
| Papua New Guinea | 2001 | 0.520252 | 0.52839  |
| Papua New Guinea | 2002 | 0.521909 | 0.529584 |
| Papua New Guinea | 2003 | 0.522595 | 0.530408 |
| Papua New Guinea | 2004 | 0.523892 | 0.532711 |
| Papua New Guinea | 2005 | 0.520392 | 0.530805 |
| Papua New Guinea | 2006 | 0.522667 | 0.534894 |
| Papua New Guinea | 2007 | 0.521963 | 0.535709 |
| Papua New Guinea | 2008 | 0.515748 | 0.531163 |
| Papua New Guinea | 2009 | 0.51058  | 0.528153 |
| Papua New Guinea | 2010 | 0.50998  | 0.528219 |
| Papua New Guinea | 2011 | 0.504127 | 0.522987 |
| Papua New Guinea | 2012 | 0.499902 | 0.520138 |
| Papua New Guinea | 2013 | 0.494541 | 0.517163 |
| Papua New Guinea | 2014 | 0.490763 | 0.51518  |
| Papua New Guinea | 2015 | 0.490012 | 0.516154 |

1  
2  
3  
4  
5  
6  
7  
8  
9  
10  
11  
12  
13  
14  
15  
16  
17  
18  
19  
20  
21  
22  
23  
24  
25  
26  
27  
28  
29  
30  
31  
32  
33  
34  
35  
36  
37  
38  
39  
40  
41  
42  
43  
44  
45  
46

|                  |      |          |          |
|------------------|------|----------|----------|
| Papua New Guinea | 2016 | 0.488799 | 0.517054 |
| Papua New Guinea | 2017 | 0.489673 | 0.518489 |
| Papua New Guinea | 2018 | 0.488274 | 0.517236 |
| Papua New Guinea | 2019 | 0.487062 | 0.516906 |
| Paraguay         | 1990 | 0.87285  | 0.733251 |
| Paraguay         | 1991 | 0.871421 | 0.73538  |
| Paraguay         | 1992 | 0.861984 | 0.731253 |
| Paraguay         | 1993 | 0.893227 | 0.763558 |
| Paraguay         | 1994 | 0.874891 | 0.750756 |
| Paraguay         | 1995 | 0.891905 | 0.767908 |
| Paraguay         | 1996 | 0.894482 | 0.771026 |
| Paraguay         | 1997 | 0.90991  | 0.786707 |
| Paraguay         | 1998 | 0.891224 | 0.772082 |
| Paraguay         | 1999 | 0.892023 | 0.776159 |
| Paraguay         | 2000 | 0.908794 | 0.790837 |
| Paraguay         | 2001 | 0.900237 | 0.782912 |
| Paraguay         | 2002 | 0.900709 | 0.784708 |
| Paraguay         | 2003 | 0.899833 | 0.784946 |
| Paraguay         | 2004 | 0.905188 | 0.78769  |
| Paraguay         | 2005 | 0.906572 | 0.78923  |
| Paraguay         | 2006 | 0.919604 | 0.800699 |
| Paraguay         | 2007 | 0.895242 | 0.778963 |
| Paraguay         | 2008 | 0.8998   | 0.782922 |
| Paraguay         | 2009 | 0.887053 | 0.770607 |
| Paraguay         | 2010 | 0.889014 | 0.769331 |

|          |      |          |          |
|----------|------|----------|----------|
| Paraguay | 2011 | 0.893574 | 0.772361 |
| Paraguay | 2012 | 0.880004 | 0.758167 |
| Paraguay | 2013 | 0.894597 | 0.76836  |
| Paraguay | 2014 | 0.863302 | 0.743413 |
| Paraguay | 2015 | 0.829355 | 0.715781 |
| Paraguay | 2016 | 0.841111 | 0.72518  |
| Paraguay | 2017 | 0.843696 | 0.726201 |
| Paraguay | 2018 | 0.843366 | 0.725494 |
| Paraguay | 2019 | 0.836684 | 0.71842  |
| Peru     | 1990 | 0.913601 | 0.863955 |
| Peru     | 1991 | 1.00472  | 0.948777 |
| Peru     | 1992 | 1.044879 | 0.98688  |
| Peru     | 1993 | 1.027759 | 0.970272 |
| Peru     | 1994 | 1.115356 | 1.054376 |
| Peru     | 1995 | 1.156215 | 1.097468 |
| Peru     | 1996 | 1.083906 | 1.03572  |
| Peru     | 1997 | 1.079265 | 1.033944 |
| Peru     | 1998 | 1.084938 | 1.038903 |
| Peru     | 1999 | 1.053269 | 1.008394 |
| Peru     | 2000 | 1.05003  | 1.00284  |
| Peru     | 2001 | 1.015949 | 0.966888 |
| Peru     | 2002 | 1.021084 | 0.968834 |
| Peru     | 2003 | 1.050852 | 0.995309 |
| Peru     | 2004 | 1.010514 | 0.953906 |
| Peru     | 2005 | 1.011217 | 0.949196 |

1  
2  
3  
4  
5  
6  
7  
8  
9  
10  
11  
12  
13  
14  
15  
16  
17  
18  
19  
20  
21  
22  
23  
24  
25  
26  
27  
28  
29  
30  
31  
32  
33  
34  
35  
36  
37  
38  
39  
40  
41  
42  
43  
44  
45  
46

|             |      |          |          |
|-------------|------|----------|----------|
| Peru        | 2006 | 0.971567 | 0.907069 |
| Peru        | 2007 | 0.93459  | 0.868534 |
| Peru        | 2008 | 0.964408 | 0.891577 |
| Peru        | 2009 | 1.005513 | 0.925821 |
| Peru        | 2010 | 1.016288 | 0.931538 |
| Peru        | 2011 | 1.030177 | 0.940505 |
| Peru        | 2012 | 1.051711 | 0.956412 |
| Peru        | 2013 | 1.058485 | 0.95881  |
| Peru        | 2014 | 1.067343 | 0.963477 |
| Peru        | 2015 | 1.06634  | 0.959772 |
| Peru        | 2016 | 1.074129 | 0.96437  |
| Peru        | 2017 | 1.089316 | 0.975806 |
| Peru        | 2018 | 1.098656 | 0.982166 |
| Peru        | 2019 | 1.110745 | 0.990734 |
| Philippines | 1990 | 0.895381 | 0.902283 |
| Philippines | 1991 | 0.880509 | 0.883263 |
| Philippines | 1992 | 0.881702 | 0.876569 |
| Philippines | 1993 | 0.877133 | 0.864402 |
| Philippines | 1994 | 0.86956  | 0.85266  |
| Philippines | 1995 | 0.87258  | 0.852439 |
| Philippines | 1996 | 0.866278 | 0.838327 |
| Philippines | 1997 | 0.8542   | 0.812544 |
| Philippines | 1998 | 0.847416 | 0.798709 |
| Philippines | 1999 | 0.848855 | 0.801611 |
| Philippines | 2000 | 0.854486 | 0.804787 |

|             |      |          |          |
|-------------|------|----------|----------|
| Philippines | 2001 | 0.854201 | 0.80103  |
| Philippines | 2002 | 0.85769  | 0.80353  |
| Philippines | 2003 | 0.847201 | 0.792661 |
| Philippines | 2004 | 0.843162 | 0.788747 |
| Philippines | 2005 | 0.841734 | 0.787366 |
| Philippines | 2006 | 0.834808 | 0.780353 |
| Philippines | 2007 | 0.832589 | 0.775666 |
| Philippines | 2008 | 0.838592 | 0.777601 |
| Philippines | 2009 | 0.835108 | 0.770345 |
| Philippines | 2010 | 0.829964 | 0.764372 |
| Philippines | 2011 | 0.827424 | 0.758476 |
| Philippines | 2012 | 0.838945 | 0.763847 |
| Philippines | 2013 | 0.85046  | 0.770959 |
| Philippines | 2014 | 0.840941 | 0.760785 |
| Philippines | 2015 | 0.845221 | 0.761678 |
| Philippines | 2016 | 0.843903 | 0.758905 |
| Philippines | 2017 | 0.852911 | 0.768268 |
| Philippines | 2018 | 0.858187 | 0.773633 |
| Philippines | 2019 | 0.859915 | 0.775107 |
| Poland      | 1990 | 0.917881 | 0.594086 |
| Poland      | 1991 | 0.90409  | 0.580834 |
| Poland      | 1992 | 0.919908 | 0.58486  |
| Poland      | 1993 | 0.946987 | 0.594748 |
| Poland      | 1994 | 0.960281 | 0.600366 |
| Poland      | 1995 | 0.958064 | 0.595011 |

|          |      |          |          |
|----------|------|----------|----------|
| Poland   | 1996 | 0.985587 | 0.604305 |
| Poland   | 1997 | 0.999282 | 0.608044 |
| Poland   | 1998 | 1.016292 | 0.611599 |
| Poland   | 1999 | 1.025894 | 0.611673 |
| Poland   | 2000 | 1.053107 | 0.615915 |
| Poland   | 2001 | 1.045756 | 0.604648 |
| Poland   | 2002 | 1.042927 | 0.59748  |
| Poland   | 2003 | 1.038911 | 0.591794 |
| Poland   | 2004 | 1.041969 | 0.592438 |
| Poland   | 2005 | 1.070954 | 0.608519 |
| Poland   | 2006 | 1.101807 | 0.627874 |
| Poland   | 2007 | 1.126684 | 0.643817 |
| Poland   | 2008 | 1.09441  | 0.626611 |
| Poland   | 2009 | 1.086273 | 0.622186 |
| Poland   | 2010 | 1.050341 | 0.600421 |
| Poland   | 2011 | 1.022768 | 0.5837   |
| Poland   | 2012 | 1.045657 | 0.594587 |
| Poland   | 2013 | 1.06034  | 0.600538 |
| Poland   | 2014 | 1.095376 | 0.617875 |
| Poland   | 2015 | 1.090725 | 0.612589 |
| Poland   | 2016 | 1.085856 | 0.609823 |
| Poland   | 2017 | 1.063426 | 0.59996  |
| Poland   | 2018 | 1.053713 | 0.59652  |
| Poland   | 2019 | 1.043147 | 0.59288  |
| Portugal | 1990 | 0.884262 | 0.543926 |

|          |      |          |          |
|----------|------|----------|----------|
| Portugal | 1991 | 0.890398 | 0.549614 |
| Portugal | 1992 | 0.887748 | 0.548645 |
| Portugal | 1993 | 0.905257 | 0.559067 |
| Portugal | 1994 | 0.934888 | 0.578709 |
| Portugal | 1995 | 0.954761 | 0.593079 |
| Portugal | 1996 | 0.955694 | 0.595236 |
| Portugal | 1997 | 0.983491 | 0.612126 |
| Portugal | 1998 | 0.9847   | 0.611874 |
| Portugal | 1999 | 0.994401 | 0.611865 |
| Portugal | 2000 | 1.014619 | 0.622443 |
| Portugal | 2001 | 1.023922 | 0.627747 |
| Portugal | 2002 | 1.046333 | 0.641815 |
| Portugal | 2003 | 1.071809 | 0.658259 |
| Portugal | 2004 | 1.082705 | 0.665587 |
| Portugal | 2005 | 1.100718 | 0.675084 |
| Portugal | 2006 | 1.117627 | 0.682107 |
| Portugal | 2007 | 1.12877  | 0.685484 |
| Portugal | 2008 | 1.135725 | 0.684655 |
| Portugal | 2009 | 1.158093 | 0.693652 |
| Portugal | 2010 | 1.181695 | 0.701173 |
| Portugal | 2011 | 1.212089 | 0.712886 |
| Portugal | 2012 | 1.214154 | 0.709169 |
| Portugal | 2013 | 1.223854 | 0.710161 |
| Portugal | 2014 | 1.23894  | 0.71278  |
| Portugal | 2015 | 1.253346 | 0.718468 |



1  
2  
3  
4  
5  
6  
7  
8  
9  
10  
11  
12  
13  
14  
15  
16  
17  
18  
19  
20  
21  
22  
23  
24  
25  
26  
27  
28  
29  
30  
31  
32  
33  
34  
35  
36  
37  
38  
39  
40  
41  
42  
43  
44  
45  
46

|             |      |          |          |
|-------------|------|----------|----------|
| Portugal    | 2016 | 1.250497 | 0.714503 |
| Portugal    | 2017 | 1.242519 | 0.710662 |
| Portugal    | 2018 | 1.247566 | 0.715337 |
| Portugal    | 2019 | 1.242236 | 0.713636 |
| Puerto Rico | 1990 | 0.80275  | 0.669891 |
| Puerto Rico | 1991 | 0.809018 | 0.669491 |
| Puerto Rico | 1992 | 0.805713 | 0.661874 |
| Puerto Rico | 1993 | 0.80907  | 0.659305 |
| Puerto Rico | 1994 | 0.823879 | 0.665447 |
| Puerto Rico | 1995 | 0.795614 | 0.637683 |
| Puerto Rico | 1996 | 0.821616 | 0.653485 |
| Puerto Rico | 1997 | 0.806042 | 0.636572 |
| Puerto Rico | 1998 | 0.783507 | 0.61465  |
| Puerto Rico | 1999 | 0.830368 | 0.646628 |
| Puerto Rico | 2000 | 0.847044 | 0.655127 |
| Puerto Rico | 2001 | 0.813541 | 0.623902 |
| Puerto Rico | 2002 | 0.837027 | 0.636125 |
| Puerto Rico | 2003 | 0.849227 | 0.641471 |
| Puerto Rico | 2004 | 0.851207 | 0.638502 |
| Puerto Rico | 2005 | 0.819532 | 0.609731 |
| Puerto Rico | 2006 | 0.828059 | 0.610677 |
| Puerto Rico | 2007 | 0.851411 | 0.623053 |
| Puerto Rico | 2008 | 0.870717 | 0.634801 |
| Puerto Rico | 2009 | 0.835635 | 0.606872 |
| Puerto Rico | 2010 | 0.873679 | 0.632793 |

|    |             |      |          |          |
|----|-------------|------|----------|----------|
| 1  |             |      |          |          |
| 2  |             |      |          |          |
| 3  |             |      |          |          |
| 4  |             |      |          |          |
| 5  | Puerto Rico | 2011 | 0.865857 | 0.627258 |
| 6  | Puerto Rico | 2012 | 0.864947 | 0.620861 |
| 7  | Puerto Rico | 2013 | 0.87645  | 0.628923 |
| 8  | Puerto Rico | 2014 | 0.887603 | 0.635695 |
| 9  | Puerto Rico | 2015 | 0.868531 | 0.617416 |
| 10 | Puerto Rico | 2016 | 0.888741 | 0.631972 |
| 11 | Puerto Rico | 2017 | 0.888622 | 0.629582 |
| 12 | Puerto Rico | 2018 | 0.911225 | 0.642743 |
| 13 | Puerto Rico | 2019 | 0.924823 | 0.650285 |
| 14 | Puerto Rico | 2019 | 0.924823 | 0.650285 |
| 15 | Puerto Rico | 2019 | 0.924823 | 0.650285 |
| 16 | Puerto Rico | 2019 | 0.924823 | 0.650285 |
| 17 | Qatar       | 1990 | 0.952955 | 1.265583 |
| 18 | Qatar       | 1991 | 0.901362 | 1.196006 |
| 19 | Qatar       | 1992 | 0.878474 | 1.194201 |
| 20 | Qatar       | 1993 | 0.898298 | 1.317721 |
| 21 | Qatar       | 1994 | 0.910554 | 1.544928 |
| 22 | Qatar       | 1995 | 0.875373 | 1.597969 |
| 23 | Qatar       | 1996 | 0.813587 | 1.370316 |
| 24 | Qatar       | 1997 | 0.763374 | 1.260175 |
| 25 | Qatar       | 1998 | 0.741687 | 1.250523 |
| 26 | Qatar       | 1999 | 0.752939 | 1.33758  |
| 27 | Qatar       | 2000 | 0.763105 | 1.470088 |
| 28 | Qatar       | 2001 | 0.776966 | 1.566502 |
| 29 | Qatar       | 2002 | 0.775655 | 1.635752 |
| 30 | Qatar       | 2003 | 0.76026  | 1.672719 |
| 31 | Qatar       | 2004 | 0.769387 | 1.81363  |
| 32 | Qatar       | 2005 | 0.780175 | 1.889947 |
| 33 | Qatar       | 2005 | 0.780175 | 1.889947 |
| 34 | Qatar       | 2005 | 0.780175 | 1.889947 |
| 35 | Qatar       | 2005 | 0.780175 | 1.889947 |
| 36 | Qatar       | 2005 | 0.780175 | 1.889947 |
| 37 | Qatar       | 2005 | 0.780175 | 1.889947 |
| 38 | Qatar       | 2005 | 0.780175 | 1.889947 |
| 39 |             |      |          |          |
| 40 |             |      |          |          |
| 41 |             |      |          |          |
| 42 |             |      |          |          |
| 43 |             |      |          |          |
| 44 |             |      |          |          |
| 45 |             |      |          |          |
| 46 |             |      |          |          |

|                   |      |          |          |
|-------------------|------|----------|----------|
| Qatar             | 2006 | 0.75546  | 1.899169 |
| Qatar             | 2007 | 0.740074 | 1.926302 |
| Qatar             | 2008 | 0.708016 | 1.953539 |
| Qatar             | 2009 | 0.686412 | 2.077397 |
| Qatar             | 2010 | 0.675395 | 2.109451 |
| Qatar             | 2011 | 0.652704 | 2.009032 |
| Qatar             | 2012 | 0.635437 | 1.934902 |
| Qatar             | 2013 | 0.645644 | 1.98802  |
| Qatar             | 2014 | 0.649426 | 1.950938 |
| Qatar             | 2015 | 0.59925  | 1.734004 |
| Qatar             | 2016 | 0.609361 | 1.770803 |
| Qatar             | 2017 | 0.624812 | 1.811416 |
| Qatar             | 2018 | 0.631227 | 1.877501 |
| Qatar             | 2019 | 0.623123 | 1.904559 |
| Republic of Korea | 1990 | 0.857258 | 0.549206 |
| Republic of Korea | 1991 | 0.875952 | 0.551973 |
| Republic of Korea | 1992 | 0.905363 | 0.563273 |
| Republic of Korea | 1993 | 0.922645 | 0.569835 |
| Republic of Korea | 1994 | 0.927687 | 0.567936 |
| Republic of Korea | 1995 | 0.968644 | 0.600595 |
| Republic of Korea | 1996 | 0.983011 | 0.618658 |
| Republic of Korea | 1997 | 1.005261 | 0.628044 |
| Republic of Korea | 1998 | 1.022196 | 0.634332 |
| Republic of Korea | 1999 | 1.047436 | 0.6421   |
| Republic of Korea | 2000 | 1.072308 | 0.652147 |

|    |                     |      |          |          |
|----|---------------------|------|----------|----------|
| 1  |                     |      |          |          |
| 2  |                     |      |          |          |
| 3  |                     |      |          |          |
| 4  |                     |      |          |          |
| 5  | Republic of Korea   | 2001 | 1.084258 | 0.656648 |
| 6  | Republic of Korea   | 2002 | 1.098332 | 0.660852 |
| 7  | Republic of Korea   | 2003 | 1.097612 | 0.658917 |
| 8  | Republic of Korea   | 2004 | 1.07524  | 0.647505 |
| 9  | Republic of Korea   | 2005 | 1.071843 | 0.64214  |
| 10 | Republic of Korea   | 2006 | 1.053906 | 0.631558 |
| 11 | Republic of Korea   | 2007 | 1.044885 | 0.623151 |
| 12 | Republic of Korea   | 2008 | 1.029952 | 0.613718 |
| 13 | Republic of Korea   | 2009 | 1.024996 | 0.609758 |
| 14 | Republic of Korea   | 2010 | 1.018097 | 0.600666 |
| 15 | Republic of Korea   | 2011 | 1.014423 | 0.595254 |
| 16 | Republic of Korea   | 2012 | 1.014457 | 0.594651 |
| 17 | Republic of Korea   | 2013 | 1.016761 | 0.598625 |
| 18 | Republic of Korea   | 2014 | 1.009222 | 0.597557 |
| 19 | Republic of Korea   | 2015 | 1.013167 | 0.598706 |
| 20 | Republic of Korea   | 2016 | 1.015444 | 0.601958 |
| 21 | Republic of Korea   | 2017 | 1.00616  | 0.602647 |
| 22 | Republic of Korea   | 2018 | 1.025879 | 0.621714 |
| 23 | Republic of Korea   | 2019 | 1.022686 | 0.625971 |
| 24 | Republic of Moldova | 1990 | 0.848599 | 0.515396 |
| 25 | Republic of Moldova | 1991 | 0.818752 | 0.511245 |
| 26 | Republic of Moldova | 1992 | 0.812354 | 0.508411 |
| 27 | Republic of Moldova | 1993 | 0.824758 | 0.520016 |
| 28 | Republic of Moldova | 1994 | 0.758844 | 0.496269 |
| 29 | Republic of Moldova | 1995 | 0.723716 | 0.482553 |
| 30 |                     |      |          |          |
| 31 |                     |      |          |          |
| 32 |                     |      |          |          |
| 33 |                     |      |          |          |
| 34 |                     |      |          |          |
| 35 |                     |      |          |          |
| 36 |                     |      |          |          |
| 37 |                     |      |          |          |
| 38 |                     |      |          |          |
| 39 |                     |      |          |          |
| 40 |                     |      |          |          |
| 41 |                     |      |          |          |
| 42 |                     |      |          |          |
| 43 |                     |      |          |          |
| 44 |                     |      |          |          |
| 45 |                     |      |          |          |
| 46 |                     |      |          |          |

1  
2  
3  
4  
5  
6  
7  
8  
9  
10  
11  
12  
13  
14  
15  
16  
17  
18  
19  
20  
21  
22  
23  
24  
25  
26  
27  
28  
29  
30  
31  
32  
33  
34  
35  
36  
37  
38  
39  
40  
41  
42  
43  
44  
45  
46

|                     |      |          |          |
|---------------------|------|----------|----------|
| Republic of Moldova | 1996 | 0.715793 | 0.47752  |
| Republic of Moldova | 1997 | 0.74865  | 0.492646 |
| Republic of Moldova | 1998 | 0.729586 | 0.478633 |
| Republic of Moldova | 1999 | 0.75475  | 0.494013 |
| Republic of Moldova | 2000 | 0.786413 | 0.514092 |
| Republic of Moldova | 2001 | 0.805144 | 0.526969 |
| Republic of Moldova | 2002 | 0.881436 | 0.580425 |
| Republic of Moldova | 2003 | 0.920664 | 0.606418 |
| Republic of Moldova | 2004 | 0.883634 | 0.573869 |
| Republic of Moldova | 2005 | 0.825192 | 0.541935 |
| Republic of Moldova | 2006 | 0.878413 | 0.571388 |
| Republic of Moldova | 2007 | 0.941002 | 0.612718 |
| Republic of Moldova | 2008 | 0.957584 | 0.626718 |
| Republic of Moldova | 2009 | 0.965352 | 0.637306 |
| Republic of Moldova | 2010 | 0.955516 | 0.637033 |
| Republic of Moldova | 2011 | 0.986443 | 0.647917 |
| Republic of Moldova | 2012 | 1.008266 | 0.659343 |
| Republic of Moldova | 2013 | 1.062256 | 0.694627 |
| Republic of Moldova | 2014 | 1.059157 | 0.69576  |
| Republic of Moldova | 2015 | 1.00229  | 0.644196 |
| Republic of Moldova | 2016 | 1.059686 | 0.666742 |
| Republic of Moldova | 2017 | 1.114566 | 0.69188  |
| Republic of Moldova | 2018 | 1.082026 | 0.672992 |
| Republic of Moldova | 2019 | 1.044547 | 0.651103 |
| Romania             | 1990 | 1.079553 | 0.866268 |

|         |      |          |          |
|---------|------|----------|----------|
| Romania | 1991 | 1.086222 | 0.862351 |
| Romania | 1992 | 1.046153 | 0.826138 |
| Romania | 1993 | 1.029617 | 0.80953  |
| Romania | 1994 | 1.012606 | 0.792177 |
| Romania | 1995 | 1.000688 | 0.777709 |
| Romania | 1996 | 0.983609 | 0.758064 |
| Romania | 1997 | 0.959848 | 0.733464 |
| Romania | 1998 | 0.981335 | 0.736681 |
| Romania | 1999 | 0.997782 | 0.738726 |
| Romania | 2000 | 0.994107 | 0.73164  |
| Romania | 2001 | 0.956077 | 0.70287  |
| Romania | 2002 | 0.951443 | 0.694438 |
| Romania | 2003 | 0.945295 | 0.685769 |
| Romania | 2004 | 0.936806 | 0.672382 |
| Romania | 2005 | 0.962369 | 0.686111 |
| Romania | 2006 | 0.981261 | 0.695823 |
| Romania | 2007 | 1.005379 | 0.708652 |
| Romania | 2008 | 0.989066 | 0.694823 |
| Romania | 2009 | 0.998743 | 0.697203 |
| Romania | 2010 | 0.99074  | 0.686144 |
| Romania | 2011 | 1.001066 | 0.685511 |
| Romania | 2012 | 0.997056 | 0.677662 |
| Romania | 2013 | 1.01578  | 0.685032 |
| Romania | 2014 | 1.005041 | 0.674832 |
| Romania | 2015 | 1.007222 | 0.673017 |

1  
2  
3  
4  
5  
6  
7  
8  
9  
10  
11  
12  
13  
14  
15  
16  
17  
18  
19  
20  
21  
22  
23  
24  
25  
26  
27  
28  
29  
30  
31  
32  
33  
34  
35  
36  
37  
38  
39  
40  
41  
42  
43  
44  
45  
46

|                    |      |          |          |
|--------------------|------|----------|----------|
| Romania            | 2016 | 1.00319  | 0.668504 |
| Romania            | 2017 | 1.008839 | 0.671674 |
| Romania            | 2018 | 1.002935 | 0.667179 |
| Romania            | 2019 | 1.007882 | 0.667713 |
| Russian Federation | 1990 | 1.237604 | 0.690445 |
| Russian Federation | 1991 | 1.240021 | 0.696266 |
| Russian Federation | 1992 | 1.175419 | 0.674369 |
| Russian Federation | 1993 | 1.095619 | 0.649003 |
| Russian Federation | 1994 | 1.066959 | 0.643526 |
| Russian Federation | 1995 | 1.088154 | 0.651418 |
| Russian Federation | 1996 | 1.13313  | 0.665031 |
| Russian Federation | 1997 | 1.192142 | 0.685413 |
| Russian Federation | 1998 | 1.203965 | 0.68899  |
| Russian Federation | 1999 | 1.163027 | 0.676473 |
| Russian Federation | 2000 | 1.12748  | 0.660553 |
| Russian Federation | 2001 | 1.143098 | 0.666437 |
| Russian Federation | 2002 | 1.151992 | 0.668583 |
| Russian Federation | 2003 | 1.154748 | 0.670397 |
| Russian Federation | 2004 | 1.162412 | 0.672801 |
| Russian Federation | 2005 | 1.157706 | 0.672401 |
| Russian Federation | 2006 | 1.19925  | 0.68176  |
| Russian Federation | 2007 | 1.232211 | 0.690174 |
| Russian Federation | 2008 | 1.223246 | 0.681691 |
| Russian Federation | 2009 | 1.255663 | 0.690114 |
| Russian Federation | 2010 | 1.250566 | 0.683559 |

|                    |      |          |          |
|--------------------|------|----------|----------|
| Russian Federation | 2011 | 1.286702 | 0.694845 |
| Russian Federation | 2012 | 1.295215 | 0.692835 |
| Russian Federation | 2013 | 1.305034 | 0.693218 |
| Russian Federation | 2014 | 1.302006 | 0.689733 |
| Russian Federation | 2015 | 1.334409 | 0.703311 |
| Russian Federation | 2016 | 1.344511 | 0.707135 |
| Russian Federation | 2017 | 1.394103 | 0.731382 |
| Russian Federation | 2018 | 1.394549 | 0.735282 |
| Russian Federation | 2019 | 1.381232 | 0.732034 |
| Rwanda             | 1990 | 0.824395 | 0.650032 |
| Rwanda             | 1991 | 0.81081  | 0.639775 |
| Rwanda             | 1992 | 0.782385 | 0.617991 |
| Rwanda             | 1993 | 0.760105 | 0.601291 |
| Rwanda             | 1994 | 0.756358 | 0.581929 |
| Rwanda             | 1995 | 0.759429 | 0.566516 |
| Rwanda             | 1996 | 0.759521 | 0.566825 |
| Rwanda             | 1997 | 0.765052 | 0.5693   |
| Rwanda             | 1998 | 0.787475 | 0.580555 |
| Rwanda             | 1999 | 0.816803 | 0.597427 |
| Rwanda             | 2000 | 0.829663 | 0.603649 |
| Rwanda             | 2001 | 0.843068 | 0.611413 |
| Rwanda             | 2002 | 0.852925 | 0.615855 |
| Rwanda             | 2003 | 0.865838 | 0.623707 |
| Rwanda             | 2004 | 0.873066 | 0.62669  |
| Rwanda             | 2005 | 0.876651 | 0.629256 |



|                       |      |          |          |
|-----------------------|------|----------|----------|
| Rwanda                | 2006 | 0.874617 | 0.628897 |
| Rwanda                | 2007 | 0.878535 | 0.630917 |
| Rwanda                | 2008 | 0.887536 | 0.635571 |
| Rwanda                | 2009 | 0.895936 | 0.641741 |
| Rwanda                | 2010 | 0.908779 | 0.649458 |
| Rwanda                | 2011 | 0.918745 | 0.656101 |
| Rwanda                | 2012 | 0.926945 | 0.661974 |
| Rwanda                | 2013 | 0.939974 | 0.672839 |
| Rwanda                | 2014 | 0.956287 | 0.683731 |
| Rwanda                | 2015 | 0.969773 | 0.693098 |
| Rwanda                | 2016 | 0.978654 | 0.701247 |
| Rwanda                | 2017 | 0.990168 | 0.711922 |
| Rwanda                | 2018 | 0.998336 | 0.721102 |
| Rwanda                | 2019 | 1.006308 | 0.729699 |
| Saint Kitts and Nevis | 1990 | 0.977618 | 0.720692 |
| Saint Kitts and Nevis | 1991 | 0.777526 | 0.583399 |
| Saint Kitts and Nevis | 1992 | 0.785881 | 0.582392 |
| Saint Kitts and Nevis | 1993 | 0.805116 | 0.592521 |
| Saint Kitts and Nevis | 1994 | 0.839028 | 0.608603 |
| Saint Kitts and Nevis | 1995 | 0.876303 | 0.63063  |
| Saint Kitts and Nevis | 1996 | 0.864655 | 0.621258 |
| Saint Kitts and Nevis | 1997 | 0.863032 | 0.618292 |
| Saint Kitts and Nevis | 1998 | 0.870163 | 0.623277 |
| Saint Kitts and Nevis | 1999 | 0.883872 | 0.634954 |
| Saint Kitts and Nevis | 2000 | 0.915314 | 0.659458 |

|    |                       |      |          |          |
|----|-----------------------|------|----------|----------|
| 1  |                       |      |          |          |
| 2  |                       |      |          |          |
| 3  |                       |      |          |          |
| 4  |                       |      |          |          |
| 5  | Saint Kitts and Nevis | 2001 | 0.928859 | 0.671865 |
| 6  | Saint Kitts and Nevis | 2002 | 0.937404 | 0.681404 |
| 7  | Saint Kitts and Nevis | 2003 | 0.933207 | 0.684634 |
| 8  | Saint Kitts and Nevis | 2004 | 0.939514 | 0.703626 |
| 9  | Saint Kitts and Nevis | 2005 | 0.924993 | 0.701387 |
| 10 | Saint Kitts and Nevis | 2006 | 0.919201 | 0.70406  |
| 11 | Saint Kitts and Nevis | 2007 | 0.915181 | 0.707981 |
| 12 | Saint Kitts and Nevis | 2008 | 0.952305 | 0.723867 |
| 13 | Saint Kitts and Nevis | 2009 | 0.968373 | 0.732117 |
| 14 | Saint Kitts and Nevis | 2010 | 0.954543 | 0.723024 |
| 15 | Saint Kitts and Nevis | 2011 | 0.948111 | 0.715818 |
| 16 | Saint Kitts and Nevis | 2012 | 0.924673 | 0.698322 |
| 17 | Saint Kitts and Nevis | 2013 | 0.918237 | 0.695838 |
| 18 | Saint Kitts and Nevis | 2014 | 0.906135 | 0.692654 |
| 19 | Saint Kitts and Nevis | 2015 | 0.881642 | 0.680331 |
| 20 | Saint Kitts and Nevis | 2016 | 0.867707 | 0.674668 |
| 21 | Saint Kitts and Nevis | 2017 | 0.850948 | 0.666632 |
| 22 | Saint Kitts and Nevis | 2018 | 0.831812 | 0.66427  |
| 23 | Saint Kitts and Nevis | 2019 | 0.750426 | 0.666059 |
| 24 | Saint Lucia           | 1990 | 0.820367 | 0.585517 |
| 25 | Saint Lucia           | 1991 | 0.834488 | 0.602001 |
| 26 | Saint Lucia           | 1992 | 0.850757 | 0.616906 |
| 27 | Saint Lucia           | 1993 | 0.849089 | 0.617068 |
| 28 | Saint Lucia           | 1994 | 0.839079 | 0.615244 |
| 29 | Saint Lucia           | 1995 | 0.835752 | 0.620428 |
| 30 |                       |      |          |          |
| 31 |                       |      |          |          |
| 32 |                       |      |          |          |
| 33 |                       |      |          |          |
| 34 |                       |      |          |          |
| 35 |                       |      |          |          |
| 36 |                       |      |          |          |
| 37 |                       |      |          |          |
| 38 |                       |      |          |          |
| 39 |                       |      |          |          |
| 40 |                       |      |          |          |
| 41 |                       |      |          |          |
| 42 |                       |      |          |          |
| 43 |                       |      |          |          |
| 44 |                       |      |          |          |
| 45 |                       |      |          |          |
| 46 |                       |      |          |          |

|    |                                  |      |          |          |
|----|----------------------------------|------|----------|----------|
| 1  |                                  |      |          |          |
| 2  |                                  |      |          |          |
| 3  |                                  |      |          |          |
| 4  |                                  |      |          |          |
| 5  | Saint Lucia                      | 1996 | 0.802615 | 0.604438 |
| 6  | Saint Lucia                      | 1997 | 0.774274 | 0.589376 |
| 7  | Saint Lucia                      | 1998 | 0.782389 | 0.602523 |
| 8  | Saint Lucia                      | 1999 | 0.790826 | 0.617421 |
| 9  | Saint Lucia                      | 2000 | 0.790218 | 0.620439 |
| 10 | Saint Lucia                      | 2001 | 0.777224 | 0.604588 |
| 11 | Saint Lucia                      | 2002 | 0.758923 | 0.587237 |
| 12 | Saint Lucia                      | 2003 | 0.760145 | 0.586709 |
| 13 | Saint Lucia                      | 2004 | 0.775105 | 0.596586 |
| 14 | Saint Lucia                      | 2005 | 0.798511 | 0.615856 |
| 15 | Saint Lucia                      | 2006 | 0.810371 | 0.630761 |
| 16 | Saint Lucia                      | 2007 | 0.751768 | 0.58511  |
| 17 | Saint Lucia                      | 2008 | 0.741994 | 0.577525 |
| 18 | Saint Lucia                      | 2009 | 0.750507 | 0.586573 |
| 19 | Saint Lucia                      | 2010 | 0.760554 | 0.601201 |
| 20 | Saint Lucia                      | 2011 | 0.809689 | 0.64893  |
| 21 | Saint Lucia                      | 2012 | 0.822286 | 0.664903 |
| 22 | Saint Lucia                      | 2013 | 0.799342 | 0.645977 |
| 23 | Saint Lucia                      | 2014 | 0.801771 | 0.650044 |
| 24 | Saint Lucia                      | 2015 | 0.793431 | 0.646977 |
| 25 | Saint Lucia                      | 2016 | 0.788999 | 0.642229 |
| 26 | Saint Lucia                      | 2017 | 0.784017 | 0.638882 |
| 27 | Saint Lucia                      | 2018 | 0.780336 | 0.636198 |
| 28 | Saint Lucia                      | 2019 | 0.778887 | 0.635259 |
| 29 | Saint Vincent and the Grenadines | 1990 | 1.055811 | 0.779191 |
| 30 |                                  |      |          |          |
| 31 |                                  |      |          |          |
| 32 |                                  |      |          |          |
| 33 |                                  |      |          |          |
| 34 |                                  |      |          |          |
| 35 |                                  |      |          |          |
| 36 |                                  |      |          |          |
| 37 |                                  |      |          |          |
| 38 |                                  |      |          |          |
| 39 |                                  |      |          |          |
| 40 |                                  |      |          |          |
| 41 |                                  |      |          |          |
| 42 |                                  |      |          |          |
| 43 |                                  |      |          |          |
| 44 |                                  |      |          |          |
| 45 |                                  |      |          |          |
| 46 |                                  |      |          |          |

|    |                                  |      |          |          |
|----|----------------------------------|------|----------|----------|
| 1  |                                  |      |          |          |
| 2  |                                  |      |          |          |
| 3  |                                  |      |          |          |
| 4  |                                  |      |          |          |
| 5  | Saint Vincent and the Grenadines | 1991 | 1.060365 | 0.797731 |
| 6  | Saint Vincent and the Grenadines | 1992 | 1.059923 | 0.810912 |
| 7  | Saint Vincent and the Grenadines | 1993 | 1.059589 | 0.821744 |
| 8  | Saint Vincent and the Grenadines | 1994 | 1.069537 | 0.844344 |
| 9  | Saint Vincent and the Grenadines | 1995 | 0.990095 | 0.786788 |
| 10 | Saint Vincent and the Grenadines | 1996 | 0.92571  | 0.739108 |
| 11 | Saint Vincent and the Grenadines | 1997 | 0.894478 | 0.717007 |
| 12 | Saint Vincent and the Grenadines | 1998 | 0.881609 | 0.708572 |
| 13 | Saint Vincent and the Grenadines | 1999 | 0.895191 | 0.717596 |
| 14 | Saint Vincent and the Grenadines | 2000 | 0.906901 | 0.727819 |
| 15 | Saint Vincent and the Grenadines | 2001 | 0.941204 | 0.766283 |
| 16 | Saint Vincent and the Grenadines | 2002 | 0.931621 | 0.760813 |
| 17 | Saint Vincent and the Grenadines | 2003 | 0.921101 | 0.754886 |
| 18 | Saint Vincent and the Grenadines | 2004 | 0.923713 | 0.758606 |
| 19 | Saint Vincent and the Grenadines | 2005 | 0.929897 | 0.771784 |
| 20 | Saint Vincent and the Grenadines | 2006 | 0.913858 | 0.763832 |
| 21 | Saint Vincent and the Grenadines | 2007 | 0.919976 | 0.775243 |
| 22 | Saint Vincent and the Grenadines | 2008 | 0.938457 | 0.802308 |
| 23 | Saint Vincent and the Grenadines | 2009 | 0.962495 | 0.834135 |
| 24 | Saint Vincent and the Grenadines | 2010 | 0.971071 | 0.849322 |
| 25 | Saint Vincent and the Grenadines | 2011 | 0.979049 | 0.865898 |
| 26 | Saint Vincent and the Grenadines | 2012 | 0.956986 | 0.863578 |
| 27 | Saint Vincent and the Grenadines | 2013 | 0.933168 | 0.860723 |
| 28 | Saint Vincent and the Grenadines | 2014 | 0.921409 | 0.863582 |
| 29 | Saint Vincent and the Grenadines | 2015 | 0.907507 | 0.86158  |
| 30 |                                  |      |          |          |
| 31 |                                  |      |          |          |
| 32 |                                  |      |          |          |
| 33 |                                  |      |          |          |
| 34 |                                  |      |          |          |
| 35 |                                  |      |          |          |
| 36 |                                  |      |          |          |
| 37 |                                  |      |          |          |
| 38 |                                  |      |          |          |
| 39 |                                  |      |          |          |
| 40 |                                  |      |          |          |
| 41 |                                  |      |          |          |
| 42 |                                  |      |          |          |
| 43 |                                  |      |          |          |
| 44 |                                  |      |          |          |
| 45 |                                  |      |          |          |
| 46 |                                  |      |          |          |

|                                  |      |          |          |
|----------------------------------|------|----------|----------|
| Saint Vincent and the Grenadines | 2016 | 0.873985 | 0.842537 |
| Saint Vincent and the Grenadines | 2017 | 0.859361 | 0.837012 |
| Saint Vincent and the Grenadines | 2018 | 0.845672 | 0.830576 |
| Saint Vincent and the Grenadines | 2019 | 0.833823 | 0.82454  |
| Samoa                            | 1990 | 0.980132 | 0.843734 |
| Samoa                            | 1991 | 1.000796 | 0.860756 |
| Samoa                            | 1992 | 1.023771 | 0.880098 |
| Samoa                            | 1993 | 1.031447 | 0.887633 |
| Samoa                            | 1994 | 1.049276 | 0.904544 |
| Samoa                            | 1995 | 1.068083 | 0.922056 |
| Samoa                            | 1996 | 1.09226  | 0.944345 |
| Samoa                            | 1997 | 1.116858 | 0.967899 |
| Samoa                            | 1998 | 1.143322 | 0.993029 |
| Samoa                            | 1999 | 1.164018 | 1.012467 |
| Samoa                            | 2000 | 1.177392 | 1.024988 |
| Samoa                            | 2001 | 1.172274 | 1.021756 |
| Samoa                            | 2002 | 1.173842 | 1.024537 |
| Samoa                            | 2003 | 1.149307 | 1.003549 |
| Samoa                            | 2004 | 1.138468 | 0.993735 |
| Samoa                            | 2005 | 1.108915 | 0.967133 |
| Samoa                            | 2006 | 1.073711 | 0.93589  |
| Samoa                            | 2007 | 1.042902 | 0.907576 |
| Samoa                            | 2008 | 1.016908 | 0.884179 |
| Samoa                            | 2009 | 0.997005 | 0.866721 |
| Samoa                            | 2010 | 0.976604 | 0.849334 |

|    |            |      |          |          |
|----|------------|------|----------|----------|
| 1  |            |      |          |          |
| 2  |            |      |          |          |
| 3  |            |      |          |          |
| 4  |            |      |          |          |
| 5  | Samoa      | 2011 | 0.979265 | 0.852803 |
| 6  | Samoa      | 2012 | 0.968264 | 0.845265 |
| 7  | Samoa      | 2013 | 0.953319 | 0.834396 |
| 8  | Samoa      | 2014 | 0.945781 | 0.83022  |
| 9  | Samoa      | 2015 | 0.951454 | 0.837853 |
| 10 | Samoa      | 2016 | 0.955475 | 0.844459 |
| 11 | Samoa      | 2017 | 0.95904  | 0.851083 |
| 12 | Samoa      | 2018 | 0.959346 | 0.855019 |
| 13 | Samoa      | 2019 | 0.959927 | 0.859111 |
| 14 | San Marino | 1990 | 1.040527 | 0.662137 |
| 15 | San Marino | 1991 | 1.034054 | 0.656258 |
| 16 | San Marino | 1992 | 1.028794 | 0.650989 |
| 17 | San Marino | 1993 | 1.017848 | 0.641779 |
| 18 | San Marino | 1994 | 1.014914 | 0.637147 |
| 19 | San Marino | 1995 | 1.022855 | 0.638643 |
| 20 | San Marino | 1996 | 1.013723 | 0.629773 |
| 21 | San Marino | 1997 | 1.0178   | 0.629635 |
| 22 | San Marino | 1998 | 1.035194 | 0.637541 |
| 23 | San Marino | 1999 | 1.043112 | 0.639273 |
| 24 | San Marino | 2000 | 1.061203 | 0.647772 |
| 25 | San Marino | 2001 | 1.10068  | 0.670472 |
| 26 | San Marino | 2002 | 1.14621  | 0.698311 |
| 27 | San Marino | 2003 | 1.202461 | 0.735765 |
| 28 | San Marino | 2004 | 1.23389  | 0.760178 |
| 29 | San Marino | 2005 | 1.268334 | 0.786763 |
| 30 |            |      |          |          |
| 31 |            |      |          |          |
| 32 |            |      |          |          |
| 33 |            |      |          |          |
| 34 |            |      |          |          |
| 35 |            |      |          |          |
| 36 |            |      |          |          |
| 37 |            |      |          |          |
| 38 |            |      |          |          |
| 39 |            |      |          |          |
| 40 |            |      |          |          |
| 41 |            |      |          |          |
| 42 |            |      |          |          |
| 43 |            |      |          |          |
| 44 |            |      |          |          |
| 45 |            |      |          |          |
| 46 |            |      |          |          |

|    |                       |      |          |          |
|----|-----------------------|------|----------|----------|
| 1  |                       |      |          |          |
| 2  |                       |      |          |          |
| 3  |                       |      |          |          |
| 4  |                       |      |          |          |
| 5  | San Marino            | 2006 | 1.273335 | 0.794871 |
| 6  | San Marino            | 2007 | 1.275614 | 0.800868 |
| 7  | San Marino            | 2008 | 1.277743 | 0.806368 |
| 8  | San Marino            | 2009 | 1.28295  | 0.813942 |
| 9  | San Marino            | 2010 | 1.285141 | 0.819464 |
| 10 | San Marino            | 2011 | 1.287608 | 0.82488  |
| 11 | San Marino            | 2012 | 1.291652 | 0.831402 |
| 12 | San Marino            | 2013 | 1.289952 | 0.834102 |
| 13 | San Marino            | 2014 | 1.286467 | 0.835325 |
| 14 | San Marino            | 2015 | 1.283363 | 0.83659  |
| 15 | San Marino            | 2016 | 1.277029 | 0.835106 |
| 16 | San Marino            | 2017 | 1.264401 | 0.829351 |
| 17 | San Marino            | 2018 | 1.251972 | 0.823236 |
| 18 | San Marino            | 2019 | 1.24039  | 0.817325 |
| 19 | Sao Tome and Principe | 1990 | 1.091374 | 0.933524 |
| 20 | Sao Tome and Principe | 1991 | 1.113804 | 0.953047 |
| 21 | Sao Tome and Principe | 1992 | 1.139972 | 0.980625 |
| 22 | Sao Tome and Principe | 1993 | 1.215059 | 1.081878 |
| 23 | Sao Tome and Principe | 1994 | 1.239155 | 1.109895 |
| 24 | Sao Tome and Principe | 1995 | 1.238259 | 1.114617 |
| 25 | Sao Tome and Principe | 1996 | 1.244594 | 1.125181 |
| 26 | Sao Tome and Principe | 1997 | 1.254845 | 1.138117 |
| 27 | Sao Tome and Principe | 1998 | 1.258592 | 1.1408   |
| 28 | Sao Tome and Principe | 1999 | 1.273254 | 1.152136 |
| 29 | Sao Tome and Principe | 2000 | 1.308013 | 1.172362 |
| 30 |                       |      |          |          |
| 31 |                       |      |          |          |
| 32 |                       |      |          |          |
| 33 |                       |      |          |          |
| 34 |                       |      |          |          |
| 35 |                       |      |          |          |
| 36 |                       |      |          |          |
| 37 |                       |      |          |          |
| 38 |                       |      |          |          |
| 39 |                       |      |          |          |
| 40 |                       |      |          |          |
| 41 |                       |      |          |          |
| 42 |                       |      |          |          |
| 43 |                       |      |          |          |
| 44 |                       |      |          |          |
| 45 |                       |      |          |          |
| 46 |                       |      |          |          |

|    |                       |      |          |          |
|----|-----------------------|------|----------|----------|
| 1  |                       |      |          |          |
| 2  |                       |      |          |          |
| 3  |                       |      |          |          |
| 4  |                       |      |          |          |
| 5  | Sao Tome and Principe | 2001 | 1.29916  | 1.159733 |
| 6  | Sao Tome and Principe | 2002 | 1.282631 | 1.149629 |
| 7  | Sao Tome and Principe | 2003 | 1.269253 | 1.131711 |
| 8  | Sao Tome and Principe | 2004 | 1.255308 | 1.12558  |
| 9  | Sao Tome and Principe | 2005 | 1.212922 | 1.088347 |
| 10 | Sao Tome and Principe | 2006 | 1.221649 | 1.093759 |
| 11 | Sao Tome and Principe | 2007 | 1.246116 | 1.111153 |
| 12 | Sao Tome and Principe | 2008 | 1.226771 | 1.095035 |
| 13 | Sao Tome and Principe | 2009 | 1.23417  | 1.099047 |
| 14 | Sao Tome and Principe | 2010 | 1.258555 | 1.117148 |
| 15 | Sao Tome and Principe | 2011 | 1.232555 | 1.096997 |
| 16 | Sao Tome and Principe | 2012 | 1.205056 | 1.075871 |
| 17 | Sao Tome and Principe | 2013 | 1.198096 | 1.069787 |
| 18 | Sao Tome and Principe | 2014 | 1.213287 | 1.080153 |
| 19 | Sao Tome and Principe | 2015 | 1.213986 | 1.080881 |
| 20 | Sao Tome and Principe | 2016 | 1.216079 | 1.082527 |
| 21 | Sao Tome and Principe | 2017 | 1.219651 | 1.086355 |
| 22 | Sao Tome and Principe | 2018 | 1.220924 | 1.08889  |
| 23 | Sao Tome and Principe | 2019 | 1.219127 | 1.08909  |
| 24 | Saudi Arabia          | 1990 | 0.695398 | 0.829786 |
| 25 | Saudi Arabia          | 1991 | 0.712169 | 0.854348 |
| 26 | Saudi Arabia          | 1992 | 0.719496 | 0.867184 |
| 27 | Saudi Arabia          | 1993 | 0.727002 | 0.878748 |
| 28 | Saudi Arabia          | 1994 | 0.742709 | 0.898777 |
| 29 | Saudi Arabia          | 1995 | 0.761874 | 0.922789 |
| 30 |                       |      |          |          |
| 31 |                       |      |          |          |
| 32 |                       |      |          |          |
| 33 |                       |      |          |          |
| 34 |                       |      |          |          |
| 35 |                       |      |          |          |
| 36 |                       |      |          |          |
| 37 |                       |      |          |          |
| 38 |                       |      |          |          |
| 39 |                       |      |          |          |
| 40 |                       |      |          |          |
| 41 |                       |      |          |          |
| 42 |                       |      |          |          |
| 43 |                       |      |          |          |
| 44 |                       |      |          |          |
| 45 |                       |      |          |          |
| 46 |                       |      |          |          |



1  
2  
3  
4  
5  
6  
7  
8  
9  
10  
11  
12  
13  
14  
15  
16  
17  
18  
19  
20  
21  
22  
23  
24  
25  
26  
27  
28  
29  
30  
31  
32  
33  
34  
35  
36  
37  
38  
39  
40  
41  
42  
43  
44  
45  
46

|              |      |          |          |
|--------------|------|----------|----------|
| Saudi Arabia | 1996 | 0.784305 | 0.947356 |
| Saudi Arabia | 1997 | 0.804263 | 0.967726 |
| Saudi Arabia | 1998 | 0.810679 | 0.973063 |
| Saudi Arabia | 1999 | 0.816395 | 0.976741 |
| Saudi Arabia | 2000 | 0.820477 | 0.983554 |
| Saudi Arabia | 2001 | 0.821211 | 0.976888 |
| Saudi Arabia | 2002 | 0.827178 | 0.977433 |
| Saudi Arabia | 2003 | 0.822493 | 0.962185 |
| Saudi Arabia | 2004 | 0.821679 | 0.95553  |
| Saudi Arabia | 2005 | 0.815244 | 0.948694 |
| Saudi Arabia | 2006 | 0.810154 | 0.94029  |
| Saudi Arabia | 2007 | 0.800765 | 0.931723 |
| Saudi Arabia | 2008 | 0.786844 | 0.922069 |
| Saudi Arabia | 2009 | 0.772323 | 0.91303  |
| Saudi Arabia | 2010 | 0.76119  | 0.911913 |
| Saudi Arabia | 2011 | 0.745556 | 0.899816 |
| Saudi Arabia | 2012 | 0.73911  | 0.89891  |
| Saudi Arabia | 2013 | 0.736146 | 0.907402 |
| Saudi Arabia | 2014 | 0.739157 | 0.923105 |
| Saudi Arabia | 2015 | 0.740954 | 0.940363 |
| Saudi Arabia | 2016 | 0.745207 | 0.95483  |
| Saudi Arabia | 2017 | 0.752481 | 0.975445 |
| Saudi Arabia | 2018 | 0.758989 | 0.995576 |
| Saudi Arabia | 2019 | 0.763422 | 1.013679 |
| Senegal      | 1990 | 0.884747 | 0.858724 |

|         |      |          |          |
|---------|------|----------|----------|
| Senegal | 1991 | 0.891844 | 0.862058 |
| Senegal | 1992 | 0.896679 | 0.863392 |
| Senegal | 1993 | 0.898105 | 0.862398 |
| Senegal | 1994 | 0.899111 | 0.862183 |
| Senegal | 1995 | 0.899343 | 0.859763 |
| Senegal | 1996 | 0.898532 | 0.857803 |
| Senegal | 1997 | 0.886586 | 0.844268 |
| Senegal | 1998 | 0.88376  | 0.840365 |
| Senegal | 1999 | 0.881527 | 0.836596 |
| Senegal | 2000 | 0.879275 | 0.831594 |
| Senegal | 2001 | 0.872506 | 0.825969 |
| Senegal | 2002 | 0.870204 | 0.822799 |
| Senegal | 2003 | 0.873973 | 0.821234 |
| Senegal | 2004 | 0.850079 | 0.798413 |
| Senegal | 2005 | 0.827835 | 0.77646  |
| Senegal | 2006 | 0.808141 | 0.756535 |
| Senegal | 2007 | 0.794045 | 0.741842 |
| Senegal | 2008 | 0.77887  | 0.72756  |
| Senegal | 2009 | 0.767907 | 0.716548 |
| Senegal | 2010 | 0.767865 | 0.711673 |
| Senegal | 2011 | 0.767131 | 0.709302 |
| Senegal | 2012 | 0.765409 | 0.707099 |
| Senegal | 2013 | 0.761534 | 0.704161 |
| Senegal | 2014 | 0.764675 | 0.707866 |
| Senegal | 2015 | 0.770795 | 0.712137 |

|         |      |          |          |
|---------|------|----------|----------|
| Senegal | 2016 | 0.779506 | 0.720298 |
| Senegal | 2017 | 0.787654 | 0.727948 |
| Senegal | 2018 | 0.79524  | 0.735888 |
| Senegal | 2019 | 0.802915 | 0.743064 |
| Serbia  | 1990 | 0.73799  | 0.603061 |
| Serbia  | 1991 | 0.751915 | 0.61215  |
| Serbia  | 1992 | 0.745895 | 0.598418 |
| Serbia  | 1993 | 0.766901 | 0.611856 |
| Serbia  | 1994 | 0.781888 | 0.620647 |
| Serbia  | 1995 | 0.792746 | 0.626364 |
| Serbia  | 1996 | 0.802507 | 0.635855 |
| Serbia  | 1997 | 0.815138 | 0.652642 |
| Serbia  | 1998 | 0.778837 | 0.621888 |
| Serbia  | 1999 | 0.794648 | 0.623776 |
| Serbia  | 2000 | 0.769534 | 0.605957 |
| Serbia  | 2001 | 0.77247  | 0.605364 |
| Serbia  | 2002 | 0.734907 | 0.574323 |
| Serbia  | 2003 | 0.746359 | 0.581392 |
| Serbia  | 2004 | 0.746084 | 0.578442 |
| Serbia  | 2005 | 0.760475 | 0.588941 |
| Serbia  | 2006 | 0.76393  | 0.589334 |
| Serbia  | 2007 | 0.77937  | 0.595466 |
| Serbia  | 2008 | 0.801348 | 0.61088  |
| Serbia  | 2009 | 0.83196  | 0.636222 |
| Serbia  | 2010 | 0.852949 | 0.653777 |

|    |            |      |          |          |
|----|------------|------|----------|----------|
| 1  |            |      |          |          |
| 2  |            |      |          |          |
| 3  |            |      |          |          |
| 4  |            |      |          |          |
| 5  | Serbia     | 2011 | 0.863156 | 0.660403 |
| 6  | Serbia     | 2012 | 0.88227  | 0.670731 |
| 7  | Serbia     | 2013 | 0.853039 | 0.639376 |
| 8  | Serbia     | 2014 | 0.87394  | 0.650601 |
| 9  | Serbia     | 2015 | 0.899328 | 0.670437 |
| 10 | Serbia     | 2016 | 0.926887 | 0.690613 |
| 11 | Serbia     | 2017 | 0.925711 | 0.690169 |
| 12 | Serbia     | 2018 | 0.933605 | 0.693648 |
| 13 | Serbia     | 2019 | 0.933707 | 0.696426 |
| 14 | Seychelles | 1990 | 1.017107 | 0.702428 |
| 15 | Seychelles | 1991 | 1.020898 | 0.697742 |
| 16 | Seychelles | 1992 | 1.022397 | 0.693457 |
| 17 | Seychelles | 1993 | 1.02782  | 0.692034 |
| 18 | Seychelles | 1994 | 1.017442 | 0.68456  |
| 19 | Seychelles | 1995 | 1.016606 | 0.679526 |
| 20 | Seychelles | 1996 | 1.045304 | 0.695115 |
| 21 | Seychelles | 1997 | 1.092161 | 0.725276 |
| 22 | Seychelles | 1998 | 1.128929 | 0.75104  |
| 23 | Seychelles | 1999 | 1.142566 | 0.765246 |
| 24 | Seychelles | 2000 | 1.186127 | 0.802943 |
| 25 | Seychelles | 2001 | 1.202158 | 0.822396 |
| 26 | Seychelles | 2002 | 1.188011 | 0.82041  |
| 27 | Seychelles | 2003 | 1.171268 | 0.813173 |
| 28 | Seychelles | 2004 | 1.209464 | 0.842131 |
| 29 | Seychelles | 2005 | 1.169282 | 0.805472 |
| 30 |            |      |          |          |
| 31 |            |      |          |          |
| 32 |            |      |          |          |
| 33 |            |      |          |          |
| 34 |            |      |          |          |
| 35 |            |      |          |          |
| 36 |            |      |          |          |
| 37 |            |      |          |          |
| 38 |            |      |          |          |
| 39 |            |      |          |          |
| 40 |            |      |          |          |
| 41 |            |      |          |          |
| 42 |            |      |          |          |
| 43 |            |      |          |          |
| 44 |            |      |          |          |
| 45 |            |      |          |          |
| 46 |            |      |          |          |

|    |              |      |          |          |
|----|--------------|------|----------|----------|
| 1  |              |      |          |          |
| 2  |              |      |          |          |
| 3  |              |      |          |          |
| 4  |              |      |          |          |
| 5  | Seychelles   | 2006 | 1.185979 | 0.818787 |
| 6  | Seychelles   | 2007 | 1.214313 | 0.845111 |
| 7  | Seychelles   | 2008 | 1.2311   | 0.859386 |
| 8  | Seychelles   | 2009 | 1.197098 | 0.834808 |
| 9  | Seychelles   | 2010 | 1.212228 | 0.867157 |
| 10 | Seychelles   | 2011 | 1.228304 | 0.902733 |
| 11 | Seychelles   | 2012 | 1.192854 | 0.880645 |
| 12 | Seychelles   | 2013 | 1.216633 | 0.907188 |
| 13 | Seychelles   | 2014 | 1.212517 | 0.925165 |
| 14 | Seychelles   | 2015 | 1.169363 | 0.915602 |
| 15 | Seychelles   | 2016 | 1.134994 | 0.909444 |
| 16 | Seychelles   | 2017 | 1.109851 | 0.89732  |
| 17 | Seychelles   | 2018 | 1.097048 | 0.897572 |
| 18 | Seychelles   | 2019 | 1.082504 | 0.898742 |
| 19 | Sierra Leone | 1990 | 0.787919 | 0.795377 |
| 20 | Sierra Leone | 1991 | 0.790962 | 0.792612 |
| 21 | Sierra Leone | 1992 | 0.792598 | 0.791321 |
| 22 | Sierra Leone | 1993 | 0.792881 | 0.789444 |
| 23 | Sierra Leone | 1994 | 0.810527 | 0.795239 |
| 24 | Sierra Leone | 1995 | 0.815354 | 0.795979 |
| 25 | Sierra Leone | 1996 | 0.830066 | 0.804332 |
| 26 | Sierra Leone | 1997 | 0.84446  | 0.812131 |
| 27 | Sierra Leone | 1998 | 0.851017 | 0.812806 |
| 28 | Sierra Leone | 1999 | 0.863143 | 0.810965 |
| 29 | Sierra Leone | 2000 | 0.867725 | 0.81152  |
| 30 |              |      |          |          |
| 31 |              |      |          |          |
| 32 |              |      |          |          |
| 33 |              |      |          |          |
| 34 |              |      |          |          |
| 35 |              |      |          |          |
| 36 |              |      |          |          |
| 37 |              |      |          |          |
| 38 |              |      |          |          |
| 39 |              |      |          |          |
| 40 |              |      |          |          |
| 41 |              |      |          |          |
| 42 |              |      |          |          |
| 43 |              |      |          |          |
| 44 |              |      |          |          |
| 45 |              |      |          |          |
| 46 |              |      |          |          |

|              |      |          |          |
|--------------|------|----------|----------|
| Sierra Leone | 2001 | 0.870057 | 0.807892 |
| Sierra Leone | 2002 | 0.88269  | 0.814524 |
| Sierra Leone | 2003 | 0.887295 | 0.814107 |
| Sierra Leone | 2004 | 0.904772 | 0.819484 |
| Sierra Leone | 2005 | 0.902009 | 0.816075 |
| Sierra Leone | 2006 | 0.904874 | 0.816248 |
| Sierra Leone | 2007 | 0.908455 | 0.817708 |
| Sierra Leone | 2008 | 0.9111   | 0.81823  |
| Sierra Leone | 2009 | 0.916357 | 0.819564 |
| Sierra Leone | 2010 | 0.905713 | 0.815749 |
| Sierra Leone | 2011 | 0.90687  | 0.815569 |
| Sierra Leone | 2012 | 0.900591 | 0.815611 |
| Sierra Leone | 2013 | 0.898045 | 0.816791 |
| Sierra Leone | 2014 | 0.901668 | 0.824467 |
| Sierra Leone | 2015 | 0.894141 | 0.823506 |
| Sierra Leone | 2016 | 0.895925 | 0.830446 |
| Sierra Leone | 2017 | 0.895543 | 0.833929 |
| Sierra Leone | 2018 | 0.89368  | 0.835265 |
| Sierra Leone | 2019 | 0.891018 | 0.836793 |
| Singapore    | 1990 | 1.163438 | 0.899451 |
| Singapore    | 1991 | 1.129393 | 0.881363 |
| Singapore    | 1992 | 1.153563 | 0.921822 |
| Singapore    | 1993 | 1.116385 | 0.896281 |
| Singapore    | 1994 | 1.076889 | 0.845189 |
| Singapore    | 1995 | 1.050864 | 0.825318 |

|           |      |          |          |
|-----------|------|----------|----------|
| Singapore | 1996 | 1.071672 | 0.841391 |
| Singapore | 1997 | 1.106303 | 0.867415 |
| Singapore | 1998 | 1.083205 | 0.853333 |
| Singapore | 1999 | 1.096735 | 0.864456 |
| Singapore | 2000 | 1.107024 | 0.8751   |
| Singapore | 2001 | 1.12114  | 0.885171 |
| Singapore | 2002 | 1.135497 | 0.893845 |
| Singapore | 2003 | 1.181337 | 0.921314 |
| Singapore | 2004 | 1.240904 | 0.956691 |
| Singapore | 2005 | 1.124899 | 0.861722 |
| Singapore | 2006 | 1.140442 | 0.868721 |
| Singapore | 2007 | 1.129855 | 0.864193 |
| Singapore | 2008 | 1.16467  | 0.901644 |
| Singapore | 2009 | 1.191044 | 0.920265 |
| Singapore | 2010 | 1.184357 | 0.90915  |
| Singapore | 2011 | 1.179199 | 0.910006 |
| Singapore | 2012 | 1.200217 | 0.933094 |
| Singapore | 2013 | 1.208179 | 0.949316 |
| Singapore | 2014 | 1.211514 | 0.953871 |
| Singapore | 2015 | 1.211928 | 0.960929 |
| Singapore | 2016 | 1.199671 | 0.951955 |
| Singapore | 2017 | 1.233326 | 0.968313 |
| Singapore | 2018 | 1.219639 | 0.959599 |
| Singapore | 2019 | 1.250283 | 0.991418 |
| Slovakia  | 1990 | 0.944649 | 0.647308 |

|          |      |          |          |
|----------|------|----------|----------|
| Slovakia | 1991 | 0.976455 | 0.663918 |
| Slovakia | 1992 | 0.955654 | 0.644376 |
| Slovakia | 1993 | 0.995726 | 0.665691 |
| Slovakia | 1994 | 1.009351 | 0.670677 |
| Slovakia | 1995 | 1.017436 | 0.674329 |
| Slovakia | 1996 | 1.009444 | 0.668133 |
| Slovakia | 1997 | 1.04119  | 0.687493 |
| Slovakia | 1998 | 0.992929 | 0.652283 |
| Slovakia | 1999 | 1.009819 | 0.657257 |
| Slovakia | 2000 | 0.975233 | 0.628247 |
| Slovakia | 2001 | 1.011914 | 0.645803 |
| Slovakia | 2002 | 0.985897 | 0.625087 |
| Slovakia | 2003 | 1.008043 | 0.633926 |
| Slovakia | 2004 | 1.051345 | 0.654676 |
| Slovakia | 2005 | 1.036508 | 0.64108  |
| Slovakia | 2006 | 1.062665 | 0.651686 |
| Slovakia | 2007 | 1.109865 | 0.678383 |
| Slovakia | 2008 | 1.093175 | 0.663884 |
| Slovakia | 2009 | 1.159077 | 0.696465 |
| Slovakia | 2010 | 1.148256 | 0.682306 |
| Slovakia | 2011 | 1.191118 | 0.703254 |
| Slovakia | 2012 | 1.21351  | 0.711767 |
| Slovakia | 2013 | 1.232331 | 0.720047 |
| Slovakia | 2014 | 1.222608 | 0.714766 |
| Slovakia | 2015 | 1.233158 | 0.725429 |



1  
2  
3  
4  
5  
6  
7  
8  
9  
10  
11  
12  
13  
14  
15  
16  
17  
18  
19  
20  
21  
22  
23  
24  
25  
26  
27  
28  
29  
30  
31  
32  
33  
34  
35  
36  
37  
38  
39  
40  
41  
42  
43  
44  
45  
46

|          |      |          |          |
|----------|------|----------|----------|
| Slovakia | 2016 | 1.258443 | 0.742765 |
| Slovakia | 2017 | 1.250698 | 0.743898 |
| Slovakia | 2018 | 1.27032  | 0.760949 |
| Slovakia | 2019 | 1.267158 | 0.765874 |
| Slovenia | 1990 | 1.394688 | 0.780119 |
| Slovenia | 1991 | 1.410467 | 0.783523 |
| Slovenia | 1992 | 1.400783 | 0.768944 |
| Slovenia | 1993 | 1.378885 | 0.753192 |
| Slovenia | 1994 | 1.367196 | 0.740969 |
| Slovenia | 1995 | 1.317961 | 0.708775 |
| Slovenia | 1996 | 1.350995 | 0.720329 |
| Slovenia | 1997 | 1.295705 | 0.687694 |
| Slovenia | 1998 | 1.251271 | 0.658323 |
| Slovenia | 1999 | 1.262306 | 0.65755  |
| Slovenia | 2000 | 1.298258 | 0.663913 |
| Slovenia | 2001 | 1.266181 | 0.640215 |
| Slovenia | 2002 | 1.25989  | 0.622485 |
| Slovenia | 2003 | 1.165627 | 0.569175 |
| Slovenia | 2004 | 1.286114 | 0.622716 |
| Slovenia | 2005 | 1.400384 | 0.668478 |
| Slovenia | 2006 | 1.322378 | 0.627958 |
| Slovenia | 2007 | 1.411386 | 0.663917 |
| Slovenia | 2008 | 1.384634 | 0.647061 |
| Slovenia | 2009 | 1.44464  | 0.669581 |
| Slovenia | 2010 | 1.445478 | 0.668507 |

|    |                 |      |          |          |
|----|-----------------|------|----------|----------|
| 1  |                 |      |          |          |
| 2  |                 |      |          |          |
| 3  |                 |      |          |          |
| 4  |                 |      |          |          |
| 5  | Slovenia        | 2011 | 1.438805 | 0.663727 |
| 6  | Slovenia        | 2012 | 1.439959 | 0.665578 |
| 7  | Slovenia        | 2013 | 1.378243 | 0.641181 |
| 8  | Slovenia        | 2014 | 1.367799 | 0.636246 |
| 9  | Slovenia        | 2015 | 1.284322 | 0.602005 |
| 10 | Slovenia        | 2016 | 1.278014 | 0.603165 |
| 11 | Slovenia        | 2017 | 1.264785 | 0.601053 |
| 12 | Slovenia        | 2018 | 1.263189 | 0.607731 |
| 13 | Slovenia        | 2019 | 1.258858 | 0.612691 |
| 14 | Slovenia        | 2019 | 1.258858 | 0.612691 |
| 15 | Slovenia        | 2019 | 1.258858 | 0.612691 |
| 16 | Slovenia        | 2019 | 1.258858 | 0.612691 |
| 17 | Slovenia        | 2019 | 1.258858 | 0.612691 |
| 18 | Slovenia        | 2019 | 1.258858 | 0.612691 |
| 19 | Slovenia        | 2019 | 1.258858 | 0.612691 |
| 20 | Slovenia        | 2019 | 1.258858 | 0.612691 |
| 21 | Slovenia        | 2019 | 1.258858 | 0.612691 |
| 22 | Slovenia        | 2019 | 1.258858 | 0.612691 |
| 23 | Slovenia        | 2019 | 1.258858 | 0.612691 |
| 24 | Slovenia        | 2019 | 1.258858 | 0.612691 |
| 25 | Slovenia        | 2019 | 1.258858 | 0.612691 |
| 26 | Slovenia        | 2019 | 1.258858 | 0.612691 |
| 27 | Slovenia        | 2019 | 1.258858 | 0.612691 |
| 28 | Slovenia        | 2019 | 1.258858 | 0.612691 |
| 29 | Slovenia        | 2019 | 1.258858 | 0.612691 |
| 30 | Slovenia        | 2019 | 1.258858 | 0.612691 |
| 31 | Slovenia        | 2019 | 1.258858 | 0.612691 |
| 32 | Slovenia        | 2019 | 1.258858 | 0.612691 |
| 33 | Slovenia        | 2019 | 1.258858 | 0.612691 |
| 34 | Slovenia        | 2019 | 1.258858 | 0.612691 |
| 35 | Slovenia        | 2019 | 1.258858 | 0.612691 |
| 36 | Slovenia        | 2019 | 1.258858 | 0.612691 |
| 37 | Slovenia        | 2019 | 1.258858 | 0.612691 |
| 38 | Slovenia        | 2019 | 1.258858 | 0.612691 |
| 39 | Slovenia        | 2019 | 1.258858 | 0.612691 |
| 40 | Slovenia        | 2019 | 1.258858 | 0.612691 |
| 41 | Slovenia        | 2019 | 1.258858 | 0.612691 |
| 42 | Slovenia        | 2019 | 1.258858 | 0.612691 |
| 43 | Slovenia        | 2019 | 1.258858 | 0.612691 |
| 44 | Slovenia        | 2019 | 1.258858 | 0.612691 |
| 45 | Slovenia        | 2019 | 1.258858 | 0.612691 |
| 46 | Slovenia        | 2019 | 1.258858 | 0.612691 |
|    | Solomon Islands | 1990 | 1.037928 | 1.144353 |
|    | Solomon Islands | 1991 | 1.044417 | 1.148198 |
|    | Solomon Islands | 1992 | 1.056013 | 1.156976 |
|    | Solomon Islands | 1993 | 1.066592 | 1.164159 |
|    | Solomon Islands | 1994 | 1.081983 | 1.175924 |
|    | Solomon Islands | 1995 | 1.097222 | 1.188241 |
|    | Solomon Islands | 1996 | 1.117544 | 1.206361 |
|    | Solomon Islands | 1997 | 1.138033 | 1.223701 |
|    | Solomon Islands | 1998 | 1.159552 | 1.241819 |
|    | Solomon Islands | 1999 | 1.178626 | 1.257071 |
|    | Solomon Islands | 2000 | 1.186507 | 1.258405 |
|    | Solomon Islands | 2001 | 1.182493 | 1.246874 |
|    | Solomon Islands | 2002 | 1.179042 | 1.236279 |
|    | Solomon Islands | 2003 | 1.182097 | 1.232562 |
|    | Solomon Islands | 2004 | 1.190252 | 1.233961 |
|    | Solomon Islands | 2005 | 1.191227 | 1.229107 |

1  
2  
3  
4  
5  
6  
7  
8  
9  
10  
11  
12  
13  
14  
15  
16  
17  
18  
19  
20  
21  
22  
23  
24  
25  
26  
27  
28  
29  
30  
31  
32  
33  
34  
35  
36  
37  
38  
39  
40  
41  
42  
43  
44  
45  
46

|                 |      |          |          |
|-----------------|------|----------|----------|
| Solomon Islands | 2006 | 1.175755 | 1.207357 |
| Solomon Islands | 2007 | 1.14858  | 1.174414 |
| Solomon Islands | 2008 | 1.102099 | 1.123378 |
| Solomon Islands | 2009 | 1.094535 | 1.111581 |
| Solomon Islands | 2010 | 1.074319 | 1.088844 |
| Solomon Islands | 2011 | 1.065332 | 1.078571 |
| Solomon Islands | 2012 | 1.049638 | 1.061376 |
| Solomon Islands | 2013 | 1.034952 | 1.044876 |
| Solomon Islands | 2014 | 1.026433 | 1.034451 |
| Solomon Islands | 2015 | 1.016654 | 1.022379 |
| Solomon Islands | 2016 | 1.007093 | 1.010933 |
| Solomon Islands | 2017 | 0.991614 | 0.993079 |
| Solomon Islands | 2018 | 0.970301 | 0.971456 |
| Solomon Islands | 2019 | 0.977609 | 0.976166 |
| Somalia         | 1990 | 0.750322 | 0.611496 |
| Somalia         | 1991 | 0.74324  | 0.601044 |
| Somalia         | 1992 | 0.728936 | 0.588467 |
| Somalia         | 1993 | 0.714142 | 0.574841 |
| Somalia         | 1994 | 0.705603 | 0.566449 |
| Somalia         | 1995 | 0.699071 | 0.560185 |
| Somalia         | 1996 | 0.704283 | 0.563338 |
| Somalia         | 1997 | 0.712917 | 0.569484 |
| Somalia         | 1998 | 0.723135 | 0.5768   |
| Somalia         | 1999 | 0.733781 | 0.58339  |
| Somalia         | 2000 | 0.743    | 0.588414 |

|              |      |          |          |
|--------------|------|----------|----------|
| Somalia      | 2001 | 0.755732 | 0.596479 |
| Somalia      | 2002 | 0.769071 | 0.604926 |
| Somalia      | 2003 | 0.784596 | 0.615255 |
| Somalia      | 2004 | 0.799497 | 0.62424  |
| Somalia      | 2005 | 0.813829 | 0.632367 |
| Somalia      | 2006 | 0.821399 | 0.634753 |
| Somalia      | 2007 | 0.832464 | 0.639935 |
| Somalia      | 2008 | 0.844469 | 0.644877 |
| Somalia      | 2009 | 0.85818  | 0.653139 |
| Somalia      | 2010 | 0.85573  | 0.64884  |
| Somalia      | 2011 | 0.853771 | 0.646719 |
| Somalia      | 2012 | 0.851149 | 0.646331 |
| Somalia      | 2013 | 0.850363 | 0.64823  |
| Somalia      | 2014 | 0.848187 | 0.649933 |
| Somalia      | 2015 | 0.846803 | 0.652619 |
| Somalia      | 2016 | 0.845299 | 0.654947 |
| Somalia      | 2017 | 0.842177 | 0.656193 |
| Somalia      | 2018 | 0.839293 | 0.655624 |
| Somalia      | 2019 | 0.839583 | 0.657314 |
| South Africa | 1990 | 0.872624 | 0.604062 |
| South Africa | 1991 | 0.844694 | 0.582752 |
| South Africa | 1992 | 0.912175 | 0.626358 |
| South Africa | 1993 | 0.863401 | 0.593813 |
| South Africa | 1994 | 0.89675  | 0.613044 |
| South Africa | 1995 | 0.800476 | 0.54839  |

|    |              |      |          |          |
|----|--------------|------|----------|----------|
| 1  |              |      |          |          |
| 2  |              |      |          |          |
| 3  |              |      |          |          |
| 4  |              |      |          |          |
| 5  | South Africa | 1996 | 0.806957 | 0.550274 |
| 6  | South Africa | 1997 | 0.857876 | 0.580401 |
| 7  | South Africa | 1998 | 0.839139 | 0.565984 |
| 8  | South Africa | 1999 | 0.862781 | 0.575683 |
| 9  | South Africa | 2000 | 0.883991 | 0.586252 |
| 10 | South Africa | 2001 | 0.882307 | 0.581695 |
| 11 | South Africa | 2002 | 0.886612 | 0.581614 |
| 12 | South Africa | 2003 | 0.883797 | 0.577566 |
| 13 | South Africa | 2004 | 0.881778 | 0.576085 |
| 14 | South Africa | 2005 | 0.876284 | 0.573943 |
| 15 | South Africa | 2006 | 0.875827 | 0.572977 |
| 16 | South Africa | 2007 | 0.865365 | 0.567608 |
| 17 | South Africa | 2008 | 0.86076  | 0.56512  |
| 18 | South Africa | 2009 | 0.858824 | 0.563312 |
| 19 | South Africa | 2010 | 0.859822 | 0.560691 |
| 20 | South Africa | 2011 | 0.874497 | 0.566917 |
| 21 | South Africa | 2012 | 0.883077 | 0.573793 |
| 22 | South Africa | 2013 | 0.891229 | 0.580179 |
| 23 | South Africa | 2014 | 0.904752 | 0.590606 |
| 24 | South Africa | 2015 | 0.907736 | 0.594396 |
| 25 | South Africa | 2016 | 0.90994  | 0.594798 |
| 26 | South Africa | 2017 | 0.893752 | 0.587799 |
| 27 | South Africa | 2018 | 0.874707 | 0.580501 |
| 28 | South Africa | 2019 | 0.872436 | 0.582659 |
| 29 | South Sudan  | 1990 | 0.617642 | 0.646117 |
| 30 |              |      |          |          |
| 31 |              |      |          |          |
| 32 |              |      |          |          |
| 33 |              |      |          |          |
| 34 |              |      |          |          |
| 35 |              |      |          |          |
| 36 |              |      |          |          |
| 37 |              |      |          |          |
| 38 |              |      |          |          |
| 39 |              |      |          |          |
| 40 |              |      |          |          |
| 41 |              |      |          |          |
| 42 |              |      |          |          |
| 43 |              |      |          |          |
| 44 |              |      |          |          |
| 45 |              |      |          |          |
| 46 |              |      |          |          |

|             |      |          |          |
|-------------|------|----------|----------|
| South Sudan | 1991 | 0.608182 | 0.639096 |
| South Sudan | 1992 | 0.59649  | 0.630499 |
| South Sudan | 1993 | 0.583919 | 0.620618 |
| South Sudan | 1994 | 0.575092 | 0.614212 |
| South Sudan | 1995 | 0.56239  | 0.606514 |
| South Sudan | 1996 | 0.563369 | 0.609884 |
| South Sudan | 1997 | 0.563668 | 0.611578 |
| South Sudan | 1998 | 0.567632 | 0.617846 |
| South Sudan | 1999 | 0.571434 | 0.623961 |
| South Sudan | 2000 | 0.574652 | 0.628503 |
| South Sudan | 2001 | 0.579118 | 0.634668 |
| South Sudan | 2002 | 0.583072 | 0.639749 |
| South Sudan | 2003 | 0.588461 | 0.647561 |
| South Sudan | 2004 | 0.592934 | 0.651815 |
| South Sudan | 2005 | 0.600938 | 0.657757 |
| South Sudan | 2006 | 0.602378 | 0.65759  |
| South Sudan | 2007 | 0.601339 | 0.654603 |
| South Sudan | 2008 | 0.600134 | 0.650473 |
| South Sudan | 2009 | 0.605369 | 0.654527 |
| South Sudan | 2010 | 0.609132 | 0.657795 |
| South Sudan | 2011 | 0.617707 | 0.666383 |
| South Sudan | 2012 | 0.626237 | 0.674514 |
| South Sudan | 2013 | 0.637096 | 0.682281 |
| South Sudan | 2014 | 0.646201 | 0.689662 |
| South Sudan | 2015 | 0.658325 | 0.698963 |

1  
2  
3  
4  
5  
6  
7  
8  
9  
10  
11  
12  
13  
14  
15  
16  
17  
18  
19  
20  
21  
22  
23  
24  
25  
26  
27  
28  
29  
30  
31  
32  
33  
34  
35  
36  
37  
38  
39  
40  
41  
42  
43  
44  
45  
46

|             |      |          |          |
|-------------|------|----------|----------|
| South Sudan | 2016 | 0.66504  | 0.704405 |
| South Sudan | 2017 | 0.668702 | 0.710524 |
| South Sudan | 2018 | 0.674969 | 0.717543 |
| South Sudan | 2019 | 0.681735 | 0.723315 |
| Spain       | 1990 | 1.141463 | 0.683647 |
| Spain       | 1991 | 1.147613 | 0.682843 |
| Spain       | 1992 | 1.158914 | 0.68726  |
| Spain       | 1993 | 1.175718 | 0.693078 |
| Spain       | 1994 | 1.192094 | 0.698995 |
| Spain       | 1995 | 1.19173  | 0.693909 |
| Spain       | 1996 | 1.207036 | 0.697607 |
| Spain       | 1997 | 1.226235 | 0.7048   |
| Spain       | 1998 | 1.217732 | 0.695168 |
| Spain       | 1999 | 1.20048  | 0.682673 |
| Spain       | 2000 | 1.228318 | 0.693744 |
| Spain       | 2001 | 1.242731 | 0.698067 |
| Spain       | 2002 | 1.238513 | 0.693436 |
| Spain       | 2003 | 1.246203 | 0.693896 |
| Spain       | 2004 | 1.251368 | 0.694341 |
| Spain       | 2005 | 1.253901 | 0.692857 |
| Spain       | 2006 | 1.261916 | 0.693236 |
| Spain       | 2007 | 1.25726  | 0.689482 |
| Spain       | 2008 | 1.266641 | 0.690584 |
| Spain       | 2009 | 1.271022 | 0.691003 |
| Spain       | 2010 | 1.264498 | 0.682622 |

|           |      |          |          |
|-----------|------|----------|----------|
| Spain     | 2011 | 1.291473 | 0.694299 |
| Spain     | 2012 | 1.314847 | 0.704675 |
| Spain     | 2013 | 1.344507 | 0.71982  |
| Spain     | 2014 | 1.360219 | 0.725666 |
| Spain     | 2015 | 1.372704 | 0.730595 |
| Spain     | 2016 | 1.381235 | 0.734868 |
| Spain     | 2017 | 1.36967  | 0.731334 |
| Spain     | 2018 | 1.393998 | 0.747474 |
| Spain     | 2019 | 1.395263 | 0.752339 |
| Sri Lanka | 1990 | 0.565329 | 0.584802 |
| Sri Lanka | 1991 | 0.578904 | 0.591445 |
| Sri Lanka | 1992 | 0.585931 | 0.589963 |
| Sri Lanka | 1993 | 0.613223 | 0.609778 |
| Sri Lanka | 1994 | 0.622568 | 0.615605 |
| Sri Lanka | 1995 | 0.602386 | 0.593602 |
| Sri Lanka | 1996 | 0.63306  | 0.6159   |
| Sri Lanka | 1997 | 0.659262 | 0.633113 |
| Sri Lanka | 1998 | 0.676796 | 0.64036  |
| Sri Lanka | 1999 | 0.692609 | 0.64573  |
| Sri Lanka | 2000 | 0.697856 | 0.645993 |
| Sri Lanka | 2001 | 0.702683 | 0.642068 |
| Sri Lanka | 2002 | 0.734883 | 0.662004 |
| Sri Lanka | 2003 | 0.748233 | 0.669226 |
| Sri Lanka | 2004 | 0.782674 | 0.693991 |
| Sri Lanka | 2005 | 0.793452 | 0.698699 |



1  
2  
3  
4  
5  
6  
7  
8  
9  
10  
11  
12  
13  
14  
15  
16  
17  
18  
19  
20  
21  
22  
23  
24  
25  
26  
27  
28  
29  
30  
31  
32  
33  
34  
35  
36  
37  
38  
39  
40  
41  
42  
43  
44  
45  
46

|           |      |          |          |
|-----------|------|----------|----------|
| Sri Lanka | 2006 | 0.819849 | 0.71548  |
| Sri Lanka | 2007 | 0.814719 | 0.702651 |
| Sri Lanka | 2008 | 0.806527 | 0.685378 |
| Sri Lanka | 2009 | 0.883706 | 0.741235 |
| Sri Lanka | 2010 | 0.855375 | 0.717334 |
| Sri Lanka | 2011 | 0.818618 | 0.683409 |
| Sri Lanka | 2012 | 0.786608 | 0.649113 |
| Sri Lanka | 2013 | 0.801781 | 0.655676 |
| Sri Lanka | 2014 | 0.796339 | 0.645695 |
| Sri Lanka | 2015 | 0.801576 | 0.645614 |
| Sri Lanka | 2016 | 0.807734 | 0.645914 |
| Sri Lanka | 2017 | 0.816588 | 0.648192 |
| Sri Lanka | 2018 | 0.838493 | 0.661592 |
| Sri Lanka | 2019 | 0.845783 | 0.662182 |
| Sudan     | 1990 | 0.915215 | 0.883364 |
| Sudan     | 1991 | 0.89466  | 0.868908 |
| Sudan     | 1992 | 0.88086  | 0.859938 |
| Sudan     | 1993 | 0.868571 | 0.852353 |
| Sudan     | 1994 | 0.862812 | 0.850964 |
| Sudan     | 1995 | 0.858514 | 0.851763 |
| Sudan     | 1996 | 0.854869 | 0.853362 |
| Sudan     | 1997 | 0.848693 | 0.851978 |
| Sudan     | 1998 | 0.841506 | 0.849976 |
| Sudan     | 1999 | 0.8354   | 0.848705 |
| Sudan     | 2000 | 0.832796 | 0.850843 |

|          |      |          |          |
|----------|------|----------|----------|
| Sudan    | 2001 | 0.834451 | 0.85806  |
| Sudan    | 2002 | 0.832769 | 0.861836 |
| Sudan    | 2003 | 0.833939 | 0.869412 |
| Sudan    | 2004 | 0.839011 | 0.879915 |
| Sudan    | 2005 | 0.849835 | 0.89299  |
| Sudan    | 2006 | 0.838268 | 0.884609 |
| Sudan    | 2007 | 0.824546 | 0.874958 |
| Sudan    | 2008 | 0.810984 | 0.865859 |
| Sudan    | 2009 | 0.802669 | 0.861309 |
| Sudan    | 2010 | 0.796912 | 0.861204 |
| Sudan    | 2011 | 0.795754 | 0.865036 |
| Sudan    | 2012 | 0.79713  | 0.870054 |
| Sudan    | 2013 | 0.8      | 0.877201 |
| Sudan    | 2014 | 0.808748 | 0.88856  |
| Sudan    | 2015 | 0.816839 | 0.901218 |
| Sudan    | 2016 | 0.822954 | 0.911158 |
| Sudan    | 2017 | 0.829787 | 0.921163 |
| Sudan    | 2018 | 0.833647 | 0.928108 |
| Sudan    | 2019 | 0.836752 | 0.93243  |
| Suriname | 1990 | 0.787543 | 0.676472 |
| Suriname | 1991 | 0.773625 | 0.664525 |
| Suriname | 1992 | 0.762927 | 0.657532 |
| Suriname | 1993 | 0.735734 | 0.635602 |
| Suriname | 1994 | 0.730993 | 0.63073  |
| Suriname | 1995 | 0.749511 | 0.643204 |

1  
2  
3  
4  
5  
6  
7  
8  
9  
10  
11  
12  
13  
14  
15  
16  
17  
18  
19  
20  
21  
22  
23  
24  
25  
26  
27  
28  
29  
30  
31  
32  
33  
34  
35  
36  
37  
38  
39  
40  
41  
42  
43  
44  
45  
46

|          |      |          |          |
|----------|------|----------|----------|
| Suriname | 1996 | 0.753184 | 0.648987 |
| Suriname | 1997 | 0.72162  | 0.620651 |
| Suriname | 1998 | 0.689955 | 0.59407  |
| Suriname | 1999 | 0.717914 | 0.623254 |
| Suriname | 2000 | 0.729871 | 0.626825 |
| Suriname | 2001 | 0.739779 | 0.625425 |
| Suriname | 2002 | 0.768182 | 0.652205 |
| Suriname | 2003 | 0.759013 | 0.647365 |
| Suriname | 2004 | 0.789716 | 0.673453 |
| Suriname | 2005 | 0.792861 | 0.669835 |
| Suriname | 2006 | 0.809596 | 0.685651 |
| Suriname | 2007 | 0.794531 | 0.673183 |
| Suriname | 2008 | 0.783635 | 0.659421 |
| Suriname | 2009 | 0.795851 | 0.66849  |
| Suriname | 2010 | 0.777593 | 0.653797 |
| Suriname | 2011 | 0.790986 | 0.667096 |
| Suriname | 2012 | 0.803316 | 0.677208 |
| Suriname | 2013 | 0.781261 | 0.653612 |
| Suriname | 2014 | 0.786669 | 0.651621 |
| Suriname | 2015 | 0.81729  | 0.675948 |
| Suriname | 2016 | 0.837001 | 0.69061  |
| Suriname | 2017 | 0.845809 | 0.696292 |
| Suriname | 2018 | 0.857382 | 0.703866 |
| Suriname | 2019 | 0.874242 | 0.715426 |
| Sweden   | 1990 | 0.754326 | 0.463779 |

|        |      |          |          |
|--------|------|----------|----------|
| Sweden | 1991 | 0.743543 | 0.454427 |
| Sweden | 1992 | 0.750763 | 0.455035 |
| Sweden | 1993 | 0.739427 | 0.445076 |
| Sweden | 1994 | 0.745978 | 0.44729  |
| Sweden | 1995 | 0.748424 | 0.448184 |
| Sweden | 1996 | 0.781246 | 0.465371 |
| Sweden | 1997 | 0.792434 | 0.470712 |
| Sweden | 1998 | 0.797746 | 0.471452 |
| Sweden | 1999 | 0.810983 | 0.477167 |
| Sweden | 2000 | 0.846597 | 0.497609 |
| Sweden | 2001 | 0.846216 | 0.497371 |
| Sweden | 2002 | 0.854622 | 0.502943 |
| Sweden | 2003 | 0.852701 | 0.503031 |
| Sweden | 2004 | 0.849916 | 0.501095 |
| Sweden | 2005 | 0.861536 | 0.509177 |
| Sweden | 2006 | 0.895253 | 0.529417 |
| Sweden | 2007 | 0.912485 | 0.538504 |
| Sweden | 2008 | 0.914439 | 0.542118 |
| Sweden | 2009 | 0.913988 | 0.54386  |
| Sweden | 2010 | 0.939152 | 0.560356 |
| Sweden | 2011 | 0.944867 | 0.567629 |
| Sweden | 2012 | 0.948257 | 0.574409 |
| Sweden | 2013 | 0.960872 | 0.587228 |
| Sweden | 2014 | 0.971413 | 0.598792 |
| Sweden | 2015 | 0.963536 | 0.59731  |

|             |      |          |          |
|-------------|------|----------|----------|
| Sweden      | 2016 | 0.968405 | 0.604055 |
| Sweden      | 2017 | 0.963346 | 0.608837 |
| Sweden      | 2018 | 0.949485 | 0.613392 |
| Sweden      | 2019 | 0.9058   | 0.598532 |
| Switzerland | 1990 | 1.062104 | 0.561863 |
| Switzerland | 1991 | 1.085297 | 0.574003 |
| Switzerland | 1992 | 1.118409 | 0.592365 |
| Switzerland | 1993 | 1.151731 | 0.609078 |
| Switzerland | 1994 | 1.192699 | 0.630941 |
| Switzerland | 1995 | 1.214237 | 0.642122 |
| Switzerland | 1996 | 1.241375 | 0.653118 |
| Switzerland | 1997 | 1.258971 | 0.662246 |
| Switzerland | 1998 | 1.265703 | 0.664328 |
| Switzerland | 1999 | 1.290294 | 0.675357 |
| Switzerland | 2000 | 1.342631 | 0.69972  |
| Switzerland | 2001 | 1.37058  | 0.709901 |
| Switzerland | 2002 | 1.38254  | 0.715449 |
| Switzerland | 2003 | 1.407761 | 0.727    |
| Switzerland | 2004 | 1.433706 | 0.740367 |
| Switzerland | 2005 | 1.469206 | 0.757813 |
| Switzerland | 2006 | 1.471483 | 0.759842 |
| Switzerland | 2007 | 1.473616 | 0.761116 |
| Switzerland | 2008 | 1.497778 | 0.778024 |
| Switzerland | 2009 | 1.497785 | 0.78351  |
| Switzerland | 2010 | 1.481958 | 0.781891 |

|                      |      |          |          |
|----------------------|------|----------|----------|
| Switzerland          | 2011 | 1.467667 | 0.77742  |
| Switzerland          | 2012 | 1.488953 | 0.789545 |
| Switzerland          | 2013 | 1.487406 | 0.790652 |
| Switzerland          | 2014 | 1.488658 | 0.792981 |
| Switzerland          | 2015 | 1.465689 | 0.780309 |
| Switzerland          | 2016 | 1.478698 | 0.796645 |
| Switzerland          | 2017 | 1.447048 | 0.795428 |
| Switzerland          | 2018 | 1.438361 | 0.801749 |
| Switzerland          | 2019 | 1.413788 | 0.800998 |
| Syrian Arab Republic | 1990 | 0.917479 | 1.018136 |
| Syrian Arab Republic | 1991 | 0.91471  | 1.035383 |
| Syrian Arab Republic | 1992 | 0.91309  | 1.052004 |
| Syrian Arab Republic | 1993 | 0.888644 | 1.046973 |
| Syrian Arab Republic | 1994 | 0.905732 | 1.091777 |
| Syrian Arab Republic | 1995 | 0.9339   | 1.155488 |
| Syrian Arab Republic | 1996 | 0.935203 | 1.179075 |
| Syrian Arab Republic | 1997 | 0.926363 | 1.188127 |
| Syrian Arab Republic | 1998 | 0.940655 | 1.218168 |
| Syrian Arab Republic | 1999 | 0.924891 | 1.217608 |
| Syrian Arab Republic | 2000 | 0.917348 | 1.226316 |
| Syrian Arab Republic | 2001 | 0.901886 | 1.202629 |
| Syrian Arab Republic | 2002 | 0.891482 | 1.176015 |
| Syrian Arab Republic | 2003 | 0.877832 | 1.168175 |
| Syrian Arab Republic | 2004 | 0.894141 | 1.205428 |
| Syrian Arab Republic | 2005 | 0.891503 | 1.221358 |

|    |                            |      |          |          |
|----|----------------------------|------|----------|----------|
| 1  |                            |      |          |          |
| 2  |                            |      |          |          |
| 3  |                            |      |          |          |
| 4  |                            |      |          |          |
| 5  | Syrian Arab Republic       | 2006 | 0.89491  | 1.244382 |
| 6  | Syrian Arab Republic       | 2007 | 0.875609 | 1.230146 |
| 7  | Syrian Arab Republic       | 2008 | 0.854031 | 1.180682 |
| 8  | Syrian Arab Republic       | 2009 | 0.870141 | 1.206509 |
| 9  | Syrian Arab Republic       | 2010 | 0.909359 | 1.261294 |
| 10 | Syrian Arab Republic       | 2011 | 0.9272   | 1.277259 |
| 11 | Syrian Arab Republic       | 2012 | 0.939035 | 1.265399 |
| 12 | Syrian Arab Republic       | 2013 | 0.958657 | 1.276741 |
| 13 | Syrian Arab Republic       | 2014 | 0.975687 | 1.28192  |
| 14 | Syrian Arab Republic       | 2015 | 0.986622 | 1.266201 |
| 15 | Syrian Arab Republic       | 2016 | 0.993034 | 1.255924 |
| 16 | Syrian Arab Republic       | 2017 | 0.998276 | 1.248525 |
| 17 | Syrian Arab Republic       | 2018 | 1.004023 | 1.245232 |
| 18 | Syrian Arab Republic       | 2019 | 1.005204 | 1.238992 |
| 19 | Taiwan (Province of China) | 1990 | 0.985425 | 1.011569 |
| 20 | Taiwan (Province of China) | 1991 | 0.995354 | 1.029026 |
| 21 | Taiwan (Province of China) | 1992 | 0.985887 | 1.02406  |
| 22 | Taiwan (Province of China) | 1993 | 0.989273 | 1.033343 |
| 23 | Taiwan (Province of China) | 1994 | 0.954842 | 1.005088 |
| 24 | Taiwan (Province of China) | 1995 | 0.961873 | 1.010782 |
| 25 | Taiwan (Province of China) | 1996 | 0.968368 | 1.020645 |
| 26 | Taiwan (Province of China) | 1997 | 0.964296 | 1.015286 |
| 27 | Taiwan (Province of China) | 1998 | 0.979169 | 1.027264 |
| 28 | Taiwan (Province of China) | 1999 | 1.002197 | 1.050918 |
| 29 | Taiwan (Province of China) | 2000 | 1.009383 | 1.056412 |
| 30 |                            |      |          |          |
| 31 |                            |      |          |          |
| 32 |                            |      |          |          |
| 33 |                            |      |          |          |
| 34 |                            |      |          |          |
| 35 |                            |      |          |          |
| 36 |                            |      |          |          |
| 37 |                            |      |          |          |
| 38 |                            |      |          |          |
| 39 |                            |      |          |          |
| 40 |                            |      |          |          |
| 41 |                            |      |          |          |
| 42 |                            |      |          |          |
| 43 |                            |      |          |          |
| 44 |                            |      |          |          |
| 45 |                            |      |          |          |
| 46 |                            |      |          |          |

|                            |      |          |          |
|----------------------------|------|----------|----------|
| Taiwan (Province of China) | 2001 | 1.009354 | 1.054034 |
| Taiwan (Province of China) | 2002 | 1.006938 | 1.043543 |
| Taiwan (Province of China) | 2003 | 1.017283 | 1.046037 |
| Taiwan (Province of China) | 2004 | 0.985298 | 1.009895 |
| Taiwan (Province of China) | 2005 | 0.980931 | 0.996768 |
| Taiwan (Province of China) | 2006 | 0.960976 | 0.966534 |
| Taiwan (Province of China) | 2007 | 0.981744 | 0.975252 |
| Taiwan (Province of China) | 2008 | 0.983518 | 0.965808 |
| Taiwan (Province of China) | 2009 | 0.999055 | 0.974124 |
| Taiwan (Province of China) | 2010 | 1.015987 | 0.975085 |
| Taiwan (Province of China) | 2011 | 0.98816  | 0.932321 |
| Taiwan (Province of China) | 2012 | 1.011285 | 0.935788 |
| Taiwan (Province of China) | 2013 | 1.014673 | 0.921141 |
| Taiwan (Province of China) | 2014 | 1.017774 | 0.913073 |
| Taiwan (Province of China) | 2015 | 1.017308 | 0.894752 |
| Taiwan (Province of China) | 2016 | 1.028637 | 0.885786 |
| Taiwan (Province of China) | 2017 | 1.049592 | 0.8845   |
| Taiwan (Province of China) | 2018 | 1.075771 | 0.889571 |
| Taiwan (Province of China) | 2019 | 1.085295 | 0.890293 |
| Tajikistan                 | 1990 | 1.073056 | 0.767723 |
| Tajikistan                 | 1991 | 1.087627 | 0.781103 |
| Tajikistan                 | 1992 | 1.074775 | 0.788456 |
| Tajikistan                 | 1993 | 1.104223 | 0.815629 |
| Tajikistan                 | 1994 | 1.111487 | 0.817704 |
| Tajikistan                 | 1995 | 1.082798 | 0.781517 |



|            |      |          |          |
|------------|------|----------|----------|
| Tajikistan | 1996 | 0.997321 | 0.703395 |
| Tajikistan | 1997 | 1.021929 | 0.708641 |
| Tajikistan | 1998 | 1.09509  | 0.757133 |
| Tajikistan | 1999 | 1.097986 | 0.769817 |
| Tajikistan | 2000 | 1.075764 | 0.773095 |
| Tajikistan | 2001 | 1.058164 | 0.766786 |
| Tajikistan | 2002 | 0.994554 | 0.740537 |
| Tajikistan | 2003 | 0.967197 | 0.738701 |
| Tajikistan | 2004 | 0.958714 | 0.745795 |
| Tajikistan | 2005 | 0.927086 | 0.725698 |
| Tajikistan | 2006 | 0.886752 | 0.692502 |
| Tajikistan | 2007 | 0.862094 | 0.673144 |
| Tajikistan | 2008 | 0.850079 | 0.661517 |
| Tajikistan | 2009 | 0.847407 | 0.659561 |
| Tajikistan | 2010 | 0.845459 | 0.657416 |
| Tajikistan | 2011 | 0.850017 | 0.665894 |
| Tajikistan | 2012 | 0.844328 | 0.666285 |
| Tajikistan | 2013 | 0.828206 | 0.64234  |
| Tajikistan | 2014 | 0.821117 | 0.634306 |
| Tajikistan | 2015 | 0.821088 | 0.630952 |
| Tajikistan | 2016 | 0.82218  | 0.628012 |
| Tajikistan | 2017 | 0.840047 | 0.6362   |
| Tajikistan | 2018 | 0.858145 | 0.653595 |
| Tajikistan | 2019 | 0.86892  | 0.663584 |
| Thailand   | 1990 | 0.681059 | 0.588169 |

|    |          |      |          |          |
|----|----------|------|----------|----------|
| 1  |          |      |          |          |
| 2  |          |      |          |          |
| 3  |          |      |          |          |
| 4  |          |      |          |          |
| 5  | Thailand | 1991 | 0.680018 | 0.593022 |
| 6  | Thailand | 1992 | 0.670693 | 0.590228 |
| 7  | Thailand | 1993 | 0.657486 | 0.586194 |
| 8  | Thailand | 1994 | 0.642782 | 0.582624 |
| 9  | Thailand | 1995 | 0.629929 | 0.578302 |
| 10 | Thailand | 1996 | 0.647371 | 0.596895 |
| 11 | Thailand | 1997 | 0.687893 | 0.630446 |
| 12 | Thailand | 1998 | 0.706685 | 0.61792  |
| 13 | Thailand | 1999 | 0.762966 | 0.658819 |
| 14 | Thailand | 2000 | 0.841298 | 0.719716 |
| 15 | Thailand | 2001 | 0.932113 | 0.799463 |
| 16 | Thailand | 2002 | 1.033857 | 0.882983 |
| 17 | Thailand | 2003 | 1.098239 | 0.934802 |
| 18 | Thailand | 2004 | 1.172291 | 0.993394 |
| 19 | Thailand | 2005 | 1.228727 | 1.038246 |
| 20 | Thailand | 2006 | 1.247513 | 1.050587 |
| 21 | Thailand | 2007 | 1.266169 | 1.065646 |
| 22 | Thailand | 2008 | 1.276799 | 1.071992 |
| 23 | Thailand | 2009 | 1.271683 | 1.063155 |
| 24 | Thailand | 2010 | 1.270152 | 1.059761 |
| 25 | Thailand | 2011 | 1.247955 | 1.040133 |
| 26 | Thailand | 2012 | 1.227875 | 1.01986  |
| 27 | Thailand | 2013 | 1.211694 | 1.00092  |
| 28 | Thailand | 2014 | 1.194524 | 0.980393 |
| 29 | Thailand | 2015 | 1.165776 | 0.949129 |
| 30 |          |      |          |          |
| 31 |          |      |          |          |
| 32 |          |      |          |          |
| 33 |          |      |          |          |
| 34 |          |      |          |          |
| 35 |          |      |          |          |
| 36 |          |      |          |          |
| 37 |          |      |          |          |
| 38 |          |      |          |          |
| 39 |          |      |          |          |
| 40 |          |      |          |          |
| 41 |          |      |          |          |
| 42 |          |      |          |          |
| 43 |          |      |          |          |
| 44 |          |      |          |          |
| 45 |          |      |          |          |
| 46 |          |      |          |          |

|    |             |      |          |          |
|----|-------------|------|----------|----------|
| 1  |             |      |          |          |
| 2  |             |      |          |          |
| 3  |             |      |          |          |
| 4  |             |      |          |          |
| 5  | Thailand    | 2016 | 1.156813 | 0.934726 |
| 6  | Thailand    | 2017 | 1.164108 | 0.932472 |
| 7  | Thailand    | 2018 | 1.183666 | 0.940038 |
| 8  | Thailand    | 2019 | 1.203826 | 0.949717 |
| 9  | Timor-Leste | 1990 | 1.196681 | 1.155464 |
| 10 | Timor-Leste | 1991 | 1.183547 | 1.14905  |
| 11 | Timor-Leste | 1992 | 1.181926 | 1.153336 |
| 12 | Timor-Leste | 1993 | 1.18303  | 1.159541 |
| 13 | Timor-Leste | 1994 | 1.182152 | 1.16208  |
| 14 | Timor-Leste | 1995 | 1.180636 | 1.156541 |
| 15 | Timor-Leste | 1996 | 1.170038 | 1.148286 |
| 16 | Timor-Leste | 1997 | 1.164627 | 1.146855 |
| 17 | Timor-Leste | 1998 | 1.154785 | 1.144469 |
| 18 | Timor-Leste | 1999 | 1.124982 | 1.120679 |
| 19 | Timor-Leste | 2000 | 1.09484  | 1.088144 |
| 20 | Timor-Leste | 2001 | 1.068454 | 1.065474 |
| 21 | Timor-Leste | 2002 | 1.044813 | 1.045044 |
| 22 | Timor-Leste | 2003 | 1.021296 | 1.023366 |
| 23 | Timor-Leste | 2004 | 1.004261 | 1.007189 |
| 24 | Timor-Leste | 2005 | 0.995047 | 0.99295  |
| 25 | Timor-Leste | 2006 | 0.983217 | 0.979306 |
| 26 | Timor-Leste | 2007 | 0.97809  | 0.972303 |
| 27 | Timor-Leste | 2008 | 0.972901 | 0.96515  |
| 28 | Timor-Leste | 2009 | 0.958798 | 0.950179 |
| 29 | Timor-Leste | 2010 | 0.946263 | 0.931787 |
| 30 |             |      |          |          |
| 31 |             |      |          |          |
| 32 |             |      |          |          |
| 33 |             |      |          |          |
| 34 |             |      |          |          |
| 35 |             |      |          |          |
| 36 |             |      |          |          |
| 37 |             |      |          |          |
| 38 |             |      |          |          |
| 39 |             |      |          |          |
| 40 |             |      |          |          |
| 41 |             |      |          |          |
| 42 |             |      |          |          |
| 43 |             |      |          |          |
| 44 |             |      |          |          |
| 45 |             |      |          |          |
| 46 |             |      |          |          |

|             |      |          |          |
|-------------|------|----------|----------|
| Timor-Leste | 2011 | 0.944849 | 0.929167 |
| Timor-Leste | 2012 | 0.937733 | 0.922057 |
| Timor-Leste | 2013 | 0.933499 | 0.917589 |
| Timor-Leste | 2014 | 0.93137  | 0.915053 |
| Timor-Leste | 2015 | 0.931167 | 0.907643 |
| Timor-Leste | 2016 | 0.928885 | 0.902893 |
| Timor-Leste | 2017 | 0.923472 | 0.896569 |
| Timor-Leste | 2018 | 0.919177 | 0.891868 |
| Timor-Leste | 2019 | 0.914942 | 0.887747 |
| Togo        | 1990 | 0.962346 | 0.830838 |
| Togo        | 1991 | 0.950342 | 0.818605 |
| Togo        | 1992 | 0.930765 | 0.801384 |
| Togo        | 1993 | 0.906439 | 0.7784   |
| Togo        | 1994 | 0.88443  | 0.755182 |
| Togo        | 1995 | 0.860386 | 0.73047  |
| Togo        | 1996 | 0.836479 | 0.708339 |
| Togo        | 1997 | 0.828206 | 0.695167 |
| Togo        | 1998 | 0.809561 | 0.674108 |
| Togo        | 1999 | 0.790023 | 0.656131 |
| Togo        | 2000 | 0.780961 | 0.645704 |
| Togo        | 2001 | 0.770827 | 0.6343   |
| Togo        | 2002 | 0.774135 | 0.631214 |
| Togo        | 2003 | 0.770561 | 0.623609 |
| Togo        | 2004 | 0.764903 | 0.614684 |
| Togo        | 2005 | 0.761828 | 0.607812 |

1  
2  
3  
4  
5  
6  
7  
8  
9  
10  
11  
12  
13  
14  
15  
16  
17  
18  
19  
20  
21  
22  
23  
24  
25  
26  
27  
28  
29  
30  
31  
32  
33  
34  
35  
36  
37  
38  
39  
40  
41  
42  
43  
44  
45  
46

|         |      |          |          |
|---------|------|----------|----------|
| Togo    | 2006 | 0.761196 | 0.602424 |
| Togo    | 2007 | 0.771884 | 0.603577 |
| Togo    | 2008 | 0.773679 | 0.597014 |
| Togo    | 2009 | 0.777731 | 0.597059 |
| Togo    | 2010 | 0.780742 | 0.597078 |
| Togo    | 2011 | 0.791777 | 0.600911 |
| Togo    | 2012 | 0.807868 | 0.605235 |
| Togo    | 2013 | 0.817276 | 0.606995 |
| Togo    | 2014 | 0.824303 | 0.612965 |
| Togo    | 2015 | 0.831794 | 0.618577 |
| Togo    | 2016 | 0.842748 | 0.627372 |
| Togo    | 2017 | 0.857032 | 0.634987 |
| Togo    | 2018 | 0.871302 | 0.642024 |
| Togo    | 2019 | 0.880134 | 0.6488   |
| Tokelau | 1990 | 1.654136 | 1.365381 |
| Tokelau | 1991 | 1.642666 | 1.35864  |
| Tokelau | 1992 | 1.620669 | 1.35639  |
| Tokelau | 1993 | 1.593963 | 1.351673 |
| Tokelau | 1994 | 1.576672 | 1.351523 |
| Tokelau | 1995 | 1.567959 | 1.352706 |
| Tokelau | 1996 | 1.573466 | 1.356843 |
| Tokelau | 1997 | 1.591125 | 1.360109 |
| Tokelau | 1998 | 1.621783 | 1.361206 |
| Tokelau | 1999 | 1.651438 | 1.353628 |
| Tokelau | 2000 | 1.677927 | 1.343664 |

|         |      |          |          |
|---------|------|----------|----------|
| Tokelau | 2001 | 1.68679  | 1.32952  |
| Tokelau | 2002 | 1.678846 | 1.323954 |
| Tokelau | 2003 | 1.646445 | 1.313106 |
| Tokelau | 2004 | 1.619364 | 1.314728 |
| Tokelau | 2005 | 1.551954 | 1.285902 |
| Tokelau | 2006 | 1.493012 | 1.260807 |
| Tokelau | 2007 | 1.434987 | 1.228593 |
| Tokelau | 2008 | 1.397422 | 1.202485 |
| Tokelau | 2009 | 1.37992  | 1.185755 |
| Tokelau | 2010 | 1.373876 | 1.178019 |
| Tokelau | 2011 | 1.361942 | 1.171336 |
| Tokelau | 2012 | 1.345399 | 1.168842 |
| Tokelau | 2013 | 1.328842 | 1.169288 |
| Tokelau | 2014 | 1.305957 | 1.165686 |
| Tokelau | 2015 | 1.28582  | 1.16589  |
| Tokelau | 2016 | 1.265894 | 1.168574 |
| Tokelau | 2017 | 1.255581 | 1.18055  |
| Tokelau | 2018 | 1.248531 | 1.189306 |
| Tokelau | 2019 | 1.245695 | 1.197551 |
| Tonga   | 1990 | 1.137947 | 0.954422 |
| Tonga   | 1991 | 1.150946 | 0.963223 |
| Tonga   | 1992 | 1.153805 | 0.956807 |
| Tonga   | 1993 | 1.175571 | 0.972467 |
| Tonga   | 1994 | 1.198633 | 0.991896 |
| Tonga   | 1995 | 1.222674 | 1.012158 |

|                     |      |          |          |
|---------------------|------|----------|----------|
| Tonga               | 1996 | 1.214661 | 1.004611 |
| Tonga               | 1997 | 1.215995 | 1.005481 |
| Tonga               | 1998 | 1.184864 | 0.982384 |
| Tonga               | 1999 | 1.116171 | 0.924504 |
| Tonga               | 2000 | 1.092365 | 0.89794  |
| Tonga               | 2001 | 1.072194 | 0.876573 |
| Tonga               | 2002 | 1.025257 | 0.834568 |
| Tonga               | 2003 | 0.987728 | 0.798999 |
| Tonga               | 2004 | 0.996284 | 0.801134 |
| Tonga               | 2005 | 1.010378 | 0.812375 |
| Tonga               | 2006 | 0.959076 | 0.770036 |
| Tonga               | 2007 | 0.91288  | 0.731886 |
| Tonga               | 2008 | 0.87431  | 0.699518 |
| Tonga               | 2009 | 0.844102 | 0.673292 |
| Tonga               | 2010 | 0.824036 | 0.655058 |
| Tonga               | 2011 | 0.811065 | 0.642886 |
| Tonga               | 2012 | 0.803065 | 0.634647 |
| Tonga               | 2013 | 0.79368  | 0.625524 |
| Tonga               | 2014 | 0.789094 | 0.620129 |
| Tonga               | 2015 | 0.790241 | 0.619271 |
| Tonga               | 2016 | 0.79346  | 0.620084 |
| Tonga               | 2017 | 0.803721 | 0.626275 |
| Tonga               | 2018 | 0.811761 | 0.630899 |
| Tonga               | 2019 | 0.819439 | 0.635363 |
| Trinidad and Tobago | 1990 | 0.600964 | 0.489801 |

|                     |      |          |          |
|---------------------|------|----------|----------|
| Trinidad and Tobago | 1991 | 0.627662 | 0.515626 |
| Trinidad and Tobago | 1992 | 0.606567 | 0.504513 |
| Trinidad and Tobago | 1993 | 0.64273  | 0.535968 |
| Trinidad and Tobago | 1994 | 0.643704 | 0.538284 |
| Trinidad and Tobago | 1995 | 0.699835 | 0.588405 |
| Trinidad and Tobago | 1996 | 0.630826 | 0.534858 |
| Trinidad and Tobago | 1997 | 0.670581 | 0.56774  |
| Trinidad and Tobago | 1998 | 0.668419 | 0.570753 |
| Trinidad and Tobago | 1999 | 0.693004 | 0.596655 |
| Trinidad and Tobago | 2000 | 0.721773 | 0.621557 |
| Trinidad and Tobago | 2001 | 0.707633 | 0.612719 |
| Trinidad and Tobago | 2002 | 0.708067 | 0.617553 |
| Trinidad and Tobago | 2003 | 0.702159 | 0.617369 |
| Trinidad and Tobago | 2004 | 0.719421 | 0.631428 |
| Trinidad and Tobago | 2005 | 0.697426 | 0.612803 |
| Trinidad and Tobago | 2006 | 0.752942 | 0.660694 |
| Trinidad and Tobago | 2007 | 0.769876 | 0.675302 |
| Trinidad and Tobago | 2008 | 0.726015 | 0.637953 |
| Trinidad and Tobago | 2009 | 0.751312 | 0.6574   |
| Trinidad and Tobago | 2010 | 0.747563 | 0.654669 |
| Trinidad and Tobago | 2011 | 0.748961 | 0.657407 |
| Trinidad and Tobago | 2012 | 0.758825 | 0.666719 |
| Trinidad and Tobago | 2013 | 0.75465  | 0.661016 |
| Trinidad and Tobago | 2014 | 0.74257  | 0.650544 |
| Trinidad and Tobago | 2015 | 0.728443 | 0.637884 |



|                     |      |          |          |
|---------------------|------|----------|----------|
| Trinidad and Tobago | 2016 | 0.714285 | 0.622822 |
| Trinidad and Tobago | 2017 | 0.708588 | 0.617215 |
| Trinidad and Tobago | 2018 | 0.705777 | 0.614191 |
| Trinidad and Tobago | 2019 | 0.700642 | 0.609275 |
| Tunisia             | 1990 | 0.922362 | 0.92216  |
| Tunisia             | 1991 | 0.91466  | 0.908992 |
| Tunisia             | 1992 | 0.909486 | 0.907232 |
| Tunisia             | 1993 | 0.893286 | 0.890379 |
| Tunisia             | 1994 | 0.889422 | 0.885243 |
| Tunisia             | 1995 | 0.915137 | 0.907174 |
| Tunisia             | 1996 | 0.915833 | 0.904284 |
| Tunisia             | 1997 | 0.911858 | 0.905111 |
| Tunisia             | 1998 | 0.906945 | 0.898084 |
| Tunisia             | 1999 | 0.902886 | 0.889968 |
| Tunisia             | 2000 | 0.895207 | 0.874845 |
| Tunisia             | 2001 | 0.896714 | 0.870498 |
| Tunisia             | 2002 | 0.901627 | 0.869276 |
| Tunisia             | 2003 | 0.896903 | 0.853638 |
| Tunisia             | 2004 | 0.907776 | 0.856652 |
| Tunisia             | 2005 | 0.920709 | 0.861737 |
| Tunisia             | 2006 | 0.929556 | 0.86298  |
| Tunisia             | 2007 | 0.942838 | 0.870231 |
| Tunisia             | 2008 | 0.955568 | 0.877671 |
| Tunisia             | 2009 | 0.960409 | 0.877045 |
| Tunisia             | 2010 | 0.968509 | 0.879379 |

|         |      |          |          |
|---------|------|----------|----------|
| Tunisia | 2011 | 0.982912 | 0.888732 |
| Tunisia | 2012 | 0.990537 | 0.890952 |
| Tunisia | 2013 | 1.002731 | 0.897425 |
| Tunisia | 2014 | 1.014181 | 0.903306 |
| Tunisia | 2015 | 1.026315 | 0.91006  |
| Tunisia | 2016 | 1.03649  | 0.914533 |
| Tunisia | 2017 | 1.04578  | 0.918231 |
| Tunisia | 2018 | 1.05692  | 0.925188 |
| Tunisia | 2019 | 1.070279 | 0.935564 |
| Turkey  | 1990 | 0.882338 | 0.747628 |
| Turkey  | 1991 | 0.923351 | 0.791123 |
| Turkey  | 1992 | 0.923977 | 0.795548 |
| Turkey  | 1993 | 0.926172 | 0.800107 |
| Turkey  | 1994 | 0.950114 | 0.827933 |
| Turkey  | 1995 | 0.9474   | 0.825339 |
| Turkey  | 1996 | 0.922129 | 0.799142 |
| Turkey  | 1997 | 0.877222 | 0.74673  |
| Turkey  | 1998 | 0.865027 | 0.727694 |
| Turkey  | 1999 | 0.904444 | 0.768061 |
| Turkey  | 2000 | 0.915587 | 0.780539 |
| Turkey  | 2001 | 0.842519 | 0.690307 |
| Turkey  | 2002 | 0.776753 | 0.607787 |
| Turkey  | 2003 | 0.77808  | 0.597431 |
| Turkey  | 2004 | 0.785448 | 0.592462 |
| Turkey  | 2005 | 0.826471 | 0.620965 |

1  
2  
3  
4  
5  
6  
7  
8  
9  
10  
11  
12  
13  
14  
15  
16  
17  
18  
19  
20  
21  
22  
23  
24  
25  
26  
27  
28  
29  
30  
31  
32  
33  
34  
35  
36  
37  
38  
39  
40  
41  
42  
43  
44  
45  
46

|              |      |          |          |
|--------------|------|----------|----------|
| Turkey       | 2006 | 0.899691 | 0.676278 |
| Turkey       | 2007 | 0.989343 | 0.75242  |
| Turkey       | 2008 | 1.072288 | 0.831128 |
| Turkey       | 2009 | 1.07198  | 0.851161 |
| Turkey       | 2010 | 1.058503 | 0.849826 |
| Turkey       | 2011 | 1.045949 | 0.845235 |
| Turkey       | 2012 | 1.043623 | 0.847286 |
| Turkey       | 2013 | 1.048438 | 0.855723 |
| Turkey       | 2014 | 1.041235 | 0.848401 |
| Turkey       | 2015 | 1.054692 | 0.857405 |
| Turkey       | 2016 | 1.081499 | 0.880422 |
| Turkey       | 2017 | 1.101105 | 0.900345 |
| Turkey       | 2018 | 1.116604 | 0.915779 |
| Turkey       | 2019 | 1.122    | 0.920632 |
| Turkmenistan | 1990 | 1.024385 | 0.767814 |
| Turkmenistan | 1991 | 1.045253 | 0.777121 |
| Turkmenistan | 1992 | 1.073674 | 0.808289 |
| Turkmenistan | 1993 | 1.021469 | 0.770932 |
| Turkmenistan | 1994 | 0.985844 | 0.746882 |
| Turkmenistan | 1995 | 0.97205  | 0.741217 |
| Turkmenistan | 1996 | 0.92706  | 0.713066 |
| Turkmenistan | 1997 | 0.900121 | 0.699398 |
| Turkmenistan | 1998 | 0.849848 | 0.6639   |
| Turkmenistan | 1999 | 0.840053 | 0.656002 |
| Turkmenistan | 2000 | 0.836794 | 0.655332 |

|              |      |          |          |
|--------------|------|----------|----------|
| Turkmenistan | 2001 | 0.85116  | 0.669704 |
| Turkmenistan | 2002 | 0.841139 | 0.66648  |
| Turkmenistan | 2003 | 0.803498 | 0.640381 |
| Turkmenistan | 2004 | 0.779975 | 0.625078 |
| Turkmenistan | 2005 | 0.77615  | 0.626214 |
| Turkmenistan | 2006 | 0.78764  | 0.638138 |
| Turkmenistan | 2007 | 0.762627 | 0.622647 |
| Turkmenistan | 2008 | 0.768426 | 0.627439 |
| Turkmenistan | 2009 | 0.78346  | 0.63939  |
| Turkmenistan | 2010 | 0.784212 | 0.642602 |
| Turkmenistan | 2011 | 0.800166 | 0.659001 |
| Turkmenistan | 2012 | 0.804281 | 0.665747 |
| Turkmenistan | 2013 | 0.75502  | 0.629872 |
| Turkmenistan | 2014 | 0.730527 | 0.612734 |
| Turkmenistan | 2015 | 0.700143 | 0.590465 |
| Turkmenistan | 2016 | 0.706254 | 0.596266 |
| Turkmenistan | 2017 | 0.704075 | 0.595532 |
| Turkmenistan | 2018 | 0.696381 | 0.58806  |
| Turkmenistan | 2019 | 0.694862 | 0.587712 |
| Tuvalu       | 1990 | 1.28414  | 0.882899 |
| Tuvalu       | 1991 | 1.271231 | 0.881089 |
| Tuvalu       | 1992 | 1.266315 | 0.883443 |
| Tuvalu       | 1993 | 1.277371 | 0.895488 |
| Tuvalu       | 1994 | 1.270392 | 0.895911 |
| Tuvalu       | 1995 | 1.282723 | 0.910113 |

1  
2  
3  
4  
5  
6  
7  
8  
9  
10  
11  
12  
13  
14  
15  
16  
17  
18  
19  
20  
21  
22  
23  
24  
25  
26  
27  
28  
29  
30  
31  
32  
33  
34  
35  
36  
37  
38  
39  
40  
41  
42  
43  
44  
45  
46

|        |      |          |          |
|--------|------|----------|----------|
| Tuvalu | 1996 | 1.28478  | 0.918413 |
| Tuvalu | 1997 | 1.283959 | 0.924284 |
| Tuvalu | 1998 | 1.26629  | 0.918439 |
| Tuvalu | 1999 | 1.265058 | 0.923673 |
| Tuvalu | 2000 | 1.27034  | 0.933788 |
| Tuvalu | 2001 | 1.248973 | 0.927207 |
| Tuvalu | 2002 | 1.230434 | 0.923587 |
| Tuvalu | 2003 | 1.209399 | 0.917821 |
| Tuvalu | 2004 | 1.19759  | 0.918897 |
| Tuvalu | 2005 | 1.160623 | 0.900505 |
| Tuvalu | 2006 | 1.128669 | 0.885957 |
| Tuvalu | 2007 | 1.088976 | 0.86284  |
| Tuvalu | 2008 | 1.055329 | 0.843309 |
| Tuvalu | 2009 | 1.029277 | 0.829027 |
| Tuvalu | 2010 | 1.0103   | 0.819353 |
| Tuvalu | 2011 | 0.990434 | 0.809332 |
| Tuvalu | 2012 | 0.972895 | 0.800738 |
| Tuvalu | 2013 | 0.958254 | 0.793897 |
| Tuvalu | 2014 | 0.943162 | 0.785966 |
| Tuvalu | 2015 | 0.932401 | 0.780965 |
| Tuvalu | 2016 | 0.922036 | 0.777291 |
| Tuvalu | 2017 | 0.917452 | 0.777446 |
| Tuvalu | 2018 | 0.911409 | 0.776202 |
| Tuvalu | 2019 | 0.904083 | 0.774402 |
| Uganda | 1990 | 0.548236 | 0.504404 |

|        |      |          |          |
|--------|------|----------|----------|
| Uganda | 1991 | 0.54013  | 0.490464 |
| Uganda | 1992 | 0.536199 | 0.480626 |
| Uganda | 1993 | 0.535278 | 0.47393  |
| Uganda | 1994 | 0.53796  | 0.471558 |
| Uganda | 1995 | 0.539955 | 0.468542 |
| Uganda | 1996 | 0.54526  | 0.469057 |
| Uganda | 1997 | 0.557288 | 0.474044 |
| Uganda | 1998 | 0.574814 | 0.482678 |
| Uganda | 1999 | 0.592851 | 0.492126 |
| Uganda | 2000 | 0.61163  | 0.502468 |
| Uganda | 2001 | 0.625378 | 0.50938  |
| Uganda | 2002 | 0.635621 | 0.514315 |
| Uganda | 2003 | 0.640481 | 0.516736 |
| Uganda | 2004 | 0.646589 | 0.518975 |
| Uganda | 2005 | 0.650511 | 0.520499 |
| Uganda | 2006 | 0.647978 | 0.517671 |
| Uganda | 2007 | 0.639278 | 0.511191 |
| Uganda | 2008 | 0.630149 | 0.504185 |
| Uganda | 2009 | 0.628857 | 0.503771 |
| Uganda | 2010 | 0.634139 | 0.506062 |
| Uganda | 2011 | 0.637465 | 0.508293 |
| Uganda | 2012 | 0.645277 | 0.514361 |
| Uganda | 2013 | 0.659301 | 0.522239 |
| Uganda | 2014 | 0.668866 | 0.527592 |
| Uganda | 2015 | 0.675581 | 0.531943 |

|         |      |          |          |
|---------|------|----------|----------|
| Uganda  | 2016 | 0.680967 | 0.534655 |
| Uganda  | 2017 | 0.68842  | 0.542143 |
| Uganda  | 2018 | 0.697821 | 0.550123 |
| Uganda  | 2019 | 0.70498  | 0.556486 |
| Ukraine | 1990 | 1.26884  | 0.535379 |
| Ukraine | 1991 | 1.265186 | 0.53084  |
| Ukraine | 1992 | 1.259455 | 0.527745 |
| Ukraine | 1993 | 1.283322 | 0.535352 |
| Ukraine | 1994 | 1.266652 | 0.530396 |
| Ukraine | 1995 | 1.223648 | 0.518507 |
| Ukraine | 1996 | 1.228618 | 0.517985 |
| Ukraine | 1997 | 1.257429 | 0.526083 |
| Ukraine | 1998 | 1.284121 | 0.532463 |
| Ukraine | 1999 | 1.261957 | 0.528379 |
| Ukraine | 2000 | 1.222739 | 0.518315 |
| Ukraine | 2001 | 1.218068 | 0.524698 |
| Ukraine | 2002 | 1.187573 | 0.52938  |
| Ukraine | 2003 | 1.17885  | 0.542352 |
| Ukraine | 2004 | 1.125673 | 0.539554 |
| Ukraine | 2005 | 1.059571 | 0.529521 |
| Ukraine | 2006 | 1.058946 | 0.534629 |
| Ukraine | 2007 | 1.027918 | 0.531838 |
| Ukraine | 2008 | 1.014702 | 0.529647 |
| Ukraine | 2009 | 1.082432 | 0.551625 |
| Ukraine | 2010 | 1.100984 | 0.556521 |

|                      |      |          |          |
|----------------------|------|----------|----------|
| Ukraine              | 2011 | 1.11073  | 0.562062 |
| Ukraine              | 2012 | 1.116488 | 0.569273 |
| Ukraine              | 2013 | 1.124589 | 0.579758 |
| Ukraine              | 2014 | 1.152312 | 0.594726 |
| Ukraine              | 2015 | 1.004352 | 0.550619 |
| Ukraine              | 2016 | 1.038161 | 0.568166 |
| Ukraine              | 2017 | 1.040673 | 0.563753 |
| Ukraine              | 2018 | 1.031214 | 0.550653 |
| Ukraine              | 2019 | 1.034153 | 0.548031 |
| United Arab Emirates | 1990 | 0.508775 | 1.055819 |
| United Arab Emirates | 1991 | 0.503032 | 1.069792 |
| United Arab Emirates | 1992 | 0.488118 | 1.067824 |
| United Arab Emirates | 1993 | 0.474784 | 1.069098 |
| United Arab Emirates | 1994 | 0.469924 | 1.103837 |
| United Arab Emirates | 1995 | 0.458375 | 1.106888 |
| United Arab Emirates | 1996 | 0.453324 | 1.114917 |
| United Arab Emirates | 1997 | 0.449076 | 1.143774 |
| United Arab Emirates | 1998 | 0.443761 | 1.145591 |
| United Arab Emirates | 1999 | 0.438082 | 1.140382 |
| United Arab Emirates | 2000 | 0.423761 | 1.063493 |
| United Arab Emirates | 2001 | 0.423709 | 1.065669 |
| United Arab Emirates | 2002 | 0.421871 | 1.066846 |
| United Arab Emirates | 2003 | 0.469095 | 1.226409 |
| United Arab Emirates | 2004 | 0.51104  | 1.461019 |
| United Arab Emirates | 2005 | 0.502397 | 1.530846 |



1  
2  
3  
4  
5  
6  
7  
8  
9  
10  
11  
12  
13  
14  
15  
16  
17  
18  
19  
20  
21  
22  
23  
24  
25  
26  
27  
28  
29  
30  
31  
32  
33  
34  
35  
36  
37  
38  
39  
40  
41  
42  
43  
44  
45  
46

|                      |      |          |          |
|----------------------|------|----------|----------|
| United Arab Emirates | 2006 | 0.484336 | 1.642268 |
| United Arab Emirates | 2007 | 0.455707 | 1.872718 |
| United Arab Emirates | 2008 | 0.414353 | 1.915966 |
| United Arab Emirates | 2009 | 0.386944 | 1.959882 |
| United Arab Emirates | 2010 | 0.377203 | 1.975313 |
| United Arab Emirates | 2011 | 0.372044 | 2.007443 |
| United Arab Emirates | 2012 | 0.369703 | 2.035482 |
| United Arab Emirates | 2013 | 0.353789 | 1.824708 |
| United Arab Emirates | 2014 | 0.302003 | 1.068639 |
| United Arab Emirates | 2015 | 0.308823 | 1.083892 |
| United Arab Emirates | 2016 | 0.313736 | 1.095106 |
| United Arab Emirates | 2017 | 0.317355 | 1.102036 |
| United Arab Emirates | 2018 | 0.322685 | 1.113433 |
| United Arab Emirates | 2019 | 0.328024 | 1.123091 |
| United Kingdom       | 1990 | 1.193318 | 0.623683 |
| United Kingdom       | 1991 | 1.185042 | 0.617732 |
| United Kingdom       | 1992 | 1.191903 | 0.620316 |
| United Kingdom       | 1993 | 1.18015  | 0.616627 |
| United Kingdom       | 1994 | 1.184645 | 0.623098 |
| United Kingdom       | 1995 | 1.165368 | 0.618961 |
| United Kingdom       | 1996 | 1.162815 | 0.622685 |
| United Kingdom       | 1997 | 1.162376 | 0.626324 |
| United Kingdom       | 1998 | 1.151615 | 0.626223 |
| United Kingdom       | 1999 | 1.132918 | 0.618551 |
| United Kingdom       | 2000 | 1.133772 | 0.621896 |

|    |                             |      |          |          |
|----|-----------------------------|------|----------|----------|
| 1  |                             |      |          |          |
| 2  |                             |      |          |          |
| 3  |                             |      |          |          |
| 4  |                             |      |          |          |
| 5  | United Kingdom              | 2001 | 1.125533 | 0.620902 |
| 6  | United Kingdom              | 2002 | 1.116016 | 0.619005 |
| 7  | United Kingdom              | 2003 | 1.130571 | 0.631655 |
| 8  | United Kingdom              | 2004 | 1.141036 | 0.64618  |
| 9  | United Kingdom              | 2005 | 1.149652 | 0.659761 |
| 10 | United Kingdom              | 2006 | 1.140951 | 0.661428 |
| 11 | United Kingdom              | 2007 | 1.151446 | 0.673374 |
| 12 | United Kingdom              | 2008 | 1.158662 | 0.683882 |
| 13 | United Kingdom              | 2009 | 1.170397 | 0.694055 |
| 14 | United Kingdom              | 2010 | 1.196585 | 0.709307 |
| 15 | United Kingdom              | 2011 | 1.225876 | 0.723568 |
| 16 | United Kingdom              | 2012 | 1.252109 | 0.736999 |
| 17 | United Kingdom              | 2013 | 1.261349 | 0.746707 |
| 18 | United Kingdom              | 2014 | 1.272174 | 0.763126 |
| 19 | United Kingdom              | 2015 | 1.2565   | 0.769459 |
| 20 | United Kingdom              | 2016 | 1.240504 | 0.775236 |
| 21 | United Kingdom              | 2017 | 1.21352  | 0.77185  |
| 22 | United Kingdom              | 2018 | 1.186146 | 0.766796 |
| 23 | United Kingdom              | 2019 | 1.164712 | 0.764333 |
| 24 | United Republic of Tanzania | 1990 | 0.781522 | 0.703391 |
| 25 | United Republic of Tanzania | 1991 | 0.770668 | 0.692076 |
| 26 | United Republic of Tanzania | 1992 | 0.762312 | 0.682524 |
| 27 | United Republic of Tanzania | 1993 | 0.757432 | 0.675606 |
| 28 | United Republic of Tanzania | 1994 | 0.754777 | 0.669585 |
| 29 | United Republic of Tanzania | 1995 | 0.754556 | 0.665336 |
| 30 |                             |      |          |          |
| 31 |                             |      |          |          |
| 32 |                             |      |          |          |
| 33 |                             |      |          |          |
| 34 |                             |      |          |          |
| 35 |                             |      |          |          |
| 36 |                             |      |          |          |
| 37 |                             |      |          |          |
| 38 |                             |      |          |          |
| 39 |                             |      |          |          |
| 40 |                             |      |          |          |
| 41 |                             |      |          |          |
| 42 |                             |      |          |          |
| 43 |                             |      |          |          |
| 44 |                             |      |          |          |
| 45 |                             |      |          |          |
| 46 |                             |      |          |          |

|    |                             |      |          |          |
|----|-----------------------------|------|----------|----------|
| 1  |                             |      |          |          |
| 2  |                             |      |          |          |
| 3  |                             |      |          |          |
| 4  |                             |      |          |          |
| 5  | United Republic of Tanzania | 1996 | 0.753179 | 0.660656 |
| 6  | United Republic of Tanzania | 1997 | 0.755772 | 0.65939  |
| 7  | United Republic of Tanzania | 1998 | 0.762045 | 0.661406 |
| 8  | United Republic of Tanzania | 1999 | 0.758868 | 0.656168 |
| 9  | United Republic of Tanzania | 2000 | 0.75477  | 0.650069 |
| 10 | United Republic of Tanzania | 2001 | 0.761333 | 0.652433 |
| 11 | United Republic of Tanzania | 2002 | 0.775263 | 0.660039 |
| 12 | United Republic of Tanzania | 2003 | 0.799231 | 0.675537 |
| 13 | United Republic of Tanzania | 2004 | 0.817084 | 0.687831 |
| 14 | United Republic of Tanzania | 2005 | 0.833331 | 0.699574 |
| 15 | United Republic of Tanzania | 2006 | 0.849816 | 0.70961  |
| 16 | United Republic of Tanzania | 2007 | 0.863137 | 0.718822 |
| 17 | United Republic of Tanzania | 2008 | 0.871853 | 0.726302 |
| 18 | United Republic of Tanzania | 2009 | 0.88892  | 0.738823 |
| 19 | United Republic of Tanzania | 2010 | 0.911233 | 0.758888 |
| 20 | United Republic of Tanzania | 2011 | 0.934464 | 0.780506 |
| 21 | United Republic of Tanzania | 2012 | 0.944435 | 0.790545 |
| 22 | United Republic of Tanzania | 2013 | 0.95813  | 0.803793 |
| 23 | United Republic of Tanzania | 2014 | 0.961943 | 0.812238 |
| 24 | United Republic of Tanzania | 2015 | 0.967976 | 0.817986 |
| 25 | United Republic of Tanzania | 2016 | 0.970737 | 0.825863 |
| 26 | United Republic of Tanzania | 2017 | 0.976471 | 0.836559 |
| 27 | United Republic of Tanzania | 2018 | 0.97822  | 0.842363 |
| 28 | United Republic of Tanzania | 2019 | 0.979223 | 0.848354 |
| 29 | United States of America    | 1990 | 1.121959 | 0.673713 |
| 30 |                             |      |          |          |
| 31 |                             |      |          |          |
| 32 |                             |      |          |          |
| 33 |                             |      |          |          |
| 34 |                             |      |          |          |
| 35 |                             |      |          |          |
| 36 |                             |      |          |          |
| 37 |                             |      |          |          |
| 38 |                             |      |          |          |
| 39 |                             |      |          |          |
| 40 |                             |      |          |          |
| 41 |                             |      |          |          |
| 42 |                             |      |          |          |
| 43 |                             |      |          |          |
| 44 |                             |      |          |          |
| 45 |                             |      |          |          |
| 46 |                             |      |          |          |

|                          |      |          |          |
|--------------------------|------|----------|----------|
| United States of America | 1991 | 1.121152 | 0.673792 |
| United States of America | 1992 | 1.118823 | 0.672728 |
| United States of America | 1993 | 1.117914 | 0.672485 |
| United States of America | 1994 | 1.127135 | 0.678043 |
| United States of America | 1995 | 1.130951 | 0.681682 |
| United States of America | 1996 | 1.147801 | 0.692919 |
| United States of America | 1997 | 1.160897 | 0.703666 |
| United States of America | 1998 | 1.167934 | 0.711278 |
| United States of America | 1999 | 1.175995 | 0.721325 |
| United States of America | 2000 | 1.185469 | 0.731829 |
| United States of America | 2001 | 1.184596 | 0.736947 |
| United States of America | 2002 | 1.166022 | 0.730166 |
| United States of America | 2003 | 1.156228 | 0.729609 |
| United States of America | 2004 | 1.162079 | 0.737919 |
| United States of America | 2005 | 1.161446 | 0.741989 |
| United States of America | 2006 | 1.170441 | 0.752624 |
| United States of America | 2007 | 1.176848 | 0.761583 |
| United States of America | 2008 | 1.157902 | 0.754912 |
| United States of America | 2009 | 1.137414 | 0.747998 |
| United States of America | 2010 | 1.112516 | 0.737069 |
| United States of America | 2011 | 1.100105 | 0.735527 |
| United States of America | 2012 | 1.079197 | 0.728297 |
| United States of America | 2013 | 1.052712 | 0.717797 |
| United States of America | 2014 | 1.045775 | 0.71982  |
| United States of America | 2015 | 1.036761 | 0.720233 |

|                              |      |          |          |
|------------------------------|------|----------|----------|
| United States of America     | 2016 | 1.018288 | 0.714376 |
| United States of America     | 2017 | 0.997852 | 0.705882 |
| United States of America     | 2018 | 0.970738 | 0.689814 |
| United States of America     | 2019 | 0.99178  | 0.704414 |
| United States Virgin Islands | 1990 | 0.873088 | 0.721712 |
| United States Virgin Islands | 1991 | 0.874237 | 0.725185 |
| United States Virgin Islands | 1992 | 0.870862 | 0.721844 |
| United States Virgin Islands | 1993 | 0.870139 | 0.720392 |
| United States Virgin Islands | 1994 | 0.875963 | 0.723101 |
| United States Virgin Islands | 1995 | 0.910227 | 0.749649 |
| United States Virgin Islands | 1996 | 0.91449  | 0.749982 |
| United States Virgin Islands | 1997 | 0.925431 | 0.756183 |
| United States Virgin Islands | 1998 | 0.934782 | 0.760012 |
| United States Virgin Islands | 1999 | 0.930633 | 0.751762 |
| United States Virgin Islands | 2000 | 0.956607 | 0.762725 |
| United States Virgin Islands | 2001 | 0.955895 | 0.760227 |
| United States Virgin Islands | 2002 | 0.959703 | 0.761204 |
| United States Virgin Islands | 2003 | 0.960362 | 0.761988 |
| United States Virgin Islands | 2004 | 0.96685  | 0.766782 |
| United States Virgin Islands | 2005 | 0.964826 | 0.766372 |
| United States Virgin Islands | 2006 | 0.926507 | 0.744328 |
| United States Virgin Islands | 2007 | 0.733662 | 0.621569 |
| United States Virgin Islands | 2008 | 0.734813 | 0.619853 |
| United States Virgin Islands | 2009 | 0.740848 | 0.622809 |
| United States Virgin Islands | 2010 | 0.746643 | 0.624255 |

|                              |      |          |          |
|------------------------------|------|----------|----------|
| United States Virgin Islands | 2011 | 0.748312 | 0.62212  |
| United States Virgin Islands | 2012 | 0.74953  | 0.619269 |
| United States Virgin Islands | 2013 | 0.748915 | 0.614179 |
| United States Virgin Islands | 2014 | 0.746855 | 0.60744  |
| United States Virgin Islands | 2015 | 0.742282 | 0.598189 |
| United States Virgin Islands | 2016 | 0.742383 | 0.591309 |
| United States Virgin Islands | 2017 | 0.750479 | 0.590251 |
| United States Virgin Islands | 2018 | 0.761021 | 0.590597 |
| United States Virgin Islands | 2019 | 0.771097 | 0.590125 |
| Uruguay                      | 1990 | 0.787892 | 0.531212 |
| Uruguay                      | 1991 | 0.815435 | 0.545513 |
| Uruguay                      | 1992 | 0.792603 | 0.529812 |
| Uruguay                      | 1993 | 0.792372 | 0.527085 |
| Uruguay                      | 1994 | 0.782112 | 0.517604 |
| Uruguay                      | 1995 | 0.776781 | 0.509406 |
| Uruguay                      | 1996 | 0.77837  | 0.508201 |
| Uruguay                      | 1997 | 0.800527 | 0.519526 |
| Uruguay                      | 1998 | 0.786886 | 0.508517 |
| Uruguay                      | 1999 | 0.810708 | 0.520204 |
| Uruguay                      | 2000 | 0.821543 | 0.525213 |
| Uruguay                      | 2001 | 0.846287 | 0.538567 |
| Uruguay                      | 2002 | 0.836056 | 0.528477 |
| Uruguay                      | 2003 | 0.864479 | 0.540434 |
| Uruguay                      | 2004 | 0.894154 | 0.553194 |
| Uruguay                      | 2005 | 0.908873 | 0.560506 |

1  
2  
3  
4  
5  
6  
7  
8  
9  
10  
11  
12  
13  
14  
15  
16  
17  
18  
19  
20  
21  
22  
23  
24  
25  
26  
27  
28  
29  
30  
31  
32  
33  
34  
35  
36  
37  
38  
39  
40  
41  
42  
43  
44  
45  
46

|            |      |          |          |
|------------|------|----------|----------|
| Uruguay    | 2006 | 0.913924 | 0.560684 |
| Uruguay    | 2007 | 0.904512 | 0.551885 |
| Uruguay    | 2008 | 0.924715 | 0.562482 |
| Uruguay    | 2009 | 0.912966 | 0.55148  |
| Uruguay    | 2010 | 0.93959  | 0.561935 |
| Uruguay    | 2011 | 0.962523 | 0.566127 |
| Uruguay    | 2012 | 0.976484 | 0.571097 |
| Uruguay    | 2013 | 0.988945 | 0.57691  |
| Uruguay    | 2014 | 0.996598 | 0.579124 |
| Uruguay    | 2015 | 1.013463 | 0.586803 |
| Uruguay    | 2016 | 1.039523 | 0.59868  |
| Uruguay    | 2017 | 1.031497 | 0.593876 |
| Uruguay    | 2018 | 1.024607 | 0.589103 |
| Uruguay    | 2019 | 1.020814 | 0.586969 |
| Uzbekistan | 1990 | 1.053712 | 0.850642 |
| Uzbekistan | 1991 | 1.058001 | 0.854141 |
| Uzbekistan | 1992 | 1.078785 | 0.8679   |
| Uzbekistan | 1993 | 1.066371 | 0.853702 |
| Uzbekistan | 1994 | 1.030576 | 0.826133 |
| Uzbekistan | 1995 | 0.981071 | 0.793016 |
| Uzbekistan | 1996 | 0.943412 | 0.769216 |
| Uzbekistan | 1997 | 0.952693 | 0.779594 |
| Uzbekistan | 1998 | 0.966792 | 0.790835 |
| Uzbekistan | 1999 | 0.943803 | 0.773295 |
| Uzbekistan | 2000 | 0.917629 | 0.749618 |

|            |      |          |          |
|------------|------|----------|----------|
| Uzbekistan | 2001 | 0.899862 | 0.73214  |
| Uzbekistan | 2002 | 0.894435 | 0.723247 |
| Uzbekistan | 2003 | 0.892522 | 0.716783 |
| Uzbekistan | 2004 | 0.89648  | 0.716733 |
| Uzbekistan | 2005 | 0.897849 | 0.728357 |
| Uzbekistan | 2006 | 0.887354 | 0.723319 |
| Uzbekistan | 2007 | 0.879009 | 0.725456 |
| Uzbekistan | 2008 | 0.868701 | 0.718806 |
| Uzbekistan | 2009 | 0.865821 | 0.718362 |
| Uzbekistan | 2010 | 0.876619 | 0.731268 |
| Uzbekistan | 2011 | 0.865302 | 0.727632 |
| Uzbekistan | 2012 | 0.862568 | 0.731741 |
| Uzbekistan | 2013 | 0.856119 | 0.730918 |
| Uzbekistan | 2014 | 0.845965 | 0.724626 |
| Uzbekistan | 2015 | 0.845181 | 0.726931 |
| Uzbekistan | 2016 | 0.839304 | 0.728291 |
| Uzbekistan | 2017 | 0.838265 | 0.723642 |
| Uzbekistan | 2018 | 0.835082 | 0.719203 |
| Uzbekistan | 2019 | 0.831718 | 0.71384  |
| Vanuatu    | 1990 | 0.924689 | 1.062804 |
| Vanuatu    | 1991 | 0.959062 | 1.090159 |
| Vanuatu    | 1992 | 0.992102 | 1.11732  |
| Vanuatu    | 1993 | 1.015954 | 1.136811 |
| Vanuatu    | 1994 | 1.050027 | 1.165347 |
| Vanuatu    | 1995 | 1.057606 | 1.170658 |



|                                    |      |          |          |
|------------------------------------|------|----------|----------|
| Vanuatu                            | 1996 | 1.075089 | 1.181653 |
| Vanuatu                            | 1997 | 1.081546 | 1.182417 |
| Vanuatu                            | 1998 | 1.087602 | 1.181903 |
| Vanuatu                            | 1999 | 1.083482 | 1.169205 |
| Vanuatu                            | 2000 | 1.055304 | 1.134576 |
| Vanuatu                            | 2001 | 1.03525  | 1.103403 |
| Vanuatu                            | 2002 | 0.979033 | 1.042508 |
| Vanuatu                            | 2003 | 0.939    | 0.996405 |
| Vanuatu                            | 2004 | 0.932133 | 0.979734 |
| Vanuatu                            | 2005 | 0.931551 | 0.967699 |
| Vanuatu                            | 2006 | 0.933997 | 0.962733 |
| Vanuatu                            | 2007 | 0.937084 | 0.957964 |
| Vanuatu                            | 2008 | 0.939521 | 0.955358 |
| Vanuatu                            | 2009 | 0.939143 | 0.952518 |
| Vanuatu                            | 2010 | 0.938401 | 0.95149  |
| Vanuatu                            | 2011 | 0.947135 | 0.960747 |
| Vanuatu                            | 2012 | 0.945052 | 0.960552 |
| Vanuatu                            | 2013 | 0.941907 | 0.960476 |
| Vanuatu                            | 2014 | 0.930911 | 0.952544 |
| Vanuatu                            | 2015 | 0.923052 | 0.947129 |
| Vanuatu                            | 2016 | 0.912979 | 0.93965  |
| Vanuatu                            | 2017 | 0.911947 | 0.940753 |
| Vanuatu                            | 2018 | 0.909456 | 0.940258 |
| Vanuatu                            | 2019 | 0.90635  | 0.939138 |
| Venezuela (Bolivarian Republic of) | 1990 | 0.816605 | 0.702689 |

|                                    |      |          |          |
|------------------------------------|------|----------|----------|
| Venezuela (Bolivarian Republic of) | 1991 | 0.804698 | 0.693203 |
| Venezuela (Bolivarian Republic of) | 1992 | 0.798843 | 0.686705 |
| Venezuela (Bolivarian Republic of) | 1993 | 0.757611 | 0.641868 |
| Venezuela (Bolivarian Republic of) | 1994 | 0.773954 | 0.64284  |
| Venezuela (Bolivarian Republic of) | 1995 | 0.78569  | 0.650344 |
| Venezuela (Bolivarian Republic of) | 1996 | 0.827465 | 0.689124 |
| Venezuela (Bolivarian Republic of) | 1997 | 0.859391 | 0.715852 |
| Venezuela (Bolivarian Republic of) | 1998 | 0.810625 | 0.676084 |
| Venezuela (Bolivarian Republic of) | 1999 | 0.831487 | 0.694345 |
| Venezuela (Bolivarian Republic of) | 2000 | 0.803139 | 0.671118 |
| Venezuela (Bolivarian Republic of) | 2001 | 0.799291 | 0.667806 |
| Venezuela (Bolivarian Republic of) | 2002 | 0.827619 | 0.684559 |
| Venezuela (Bolivarian Republic of) | 2003 | 0.765497 | 0.632291 |
| Venezuela (Bolivarian Republic of) | 2004 | 0.775109 | 0.637159 |
| Venezuela (Bolivarian Republic of) | 2005 | 0.759502 | 0.621158 |
| Venezuela (Bolivarian Republic of) | 2006 | 0.708105 | 0.576335 |
| Venezuela (Bolivarian Republic of) | 2007 | 0.670884 | 0.544186 |
| Venezuela (Bolivarian Republic of) | 2008 | 0.667097 | 0.540119 |
| Venezuela (Bolivarian Republic of) | 2009 | 0.678994 | 0.548394 |
| Venezuela (Bolivarian Republic of) | 2010 | 0.768656 | 0.622094 |
| Venezuela (Bolivarian Republic of) | 2011 | 0.78214  | 0.635776 |
| Venezuela (Bolivarian Republic of) | 2012 | 0.752834 | 0.615282 |
| Venezuela (Bolivarian Republic of) | 2013 | 0.769992 | 0.630856 |
| Venezuela (Bolivarian Republic of) | 2014 | 0.884428 | 0.726306 |
| Venezuela (Bolivarian Republic of) | 2015 | 0.880047 | 0.72823  |

|                                    |      |          |          |
|------------------------------------|------|----------|----------|
| Venezuela (Bolivarian Republic of) | 2016 | 0.860449 | 0.71614  |
| Venezuela (Bolivarian Republic of) | 2017 | 0.828765 | 0.692569 |
| Venezuela (Bolivarian Republic of) | 2018 | 0.805853 | 0.675996 |
| Venezuela (Bolivarian Republic of) | 2019 | 0.785368 | 0.659536 |
| Viet Nam                           | 1990 | 1.930348 | 1.258255 |
| Viet Nam                           | 1991 | 1.895754 | 1.240529 |
| Viet Nam                           | 1992 | 1.868496 | 1.226206 |
| Viet Nam                           | 1993 | 1.841509 | 1.210638 |
| Viet Nam                           | 1994 | 1.813586 | 1.193323 |
| Viet Nam                           | 1995 | 1.782829 | 1.172882 |
| Viet Nam                           | 1996 | 1.743699 | 1.147006 |
| Viet Nam                           | 1997 | 1.709193 | 1.122924 |
| Viet Nam                           | 1998 | 1.672772 | 1.096766 |
| Viet Nam                           | 1999 | 1.63651  | 1.070041 |
| Viet Nam                           | 2000 | 1.579058 | 1.030261 |
| Viet Nam                           | 2001 | 1.521513 | 0.993379 |
| Viet Nam                           | 2002 | 1.47358  | 0.962    |
| Viet Nam                           | 2003 | 1.431813 | 0.932566 |
| Viet Nam                           | 2004 | 1.392316 | 0.903543 |
| Viet Nam                           | 2005 | 1.353006 | 0.874162 |
| Viet Nam                           | 2006 | 1.337065 | 0.859607 |
| Viet Nam                           | 2007 | 1.324604 | 0.850056 |
| Viet Nam                           | 2008 | 1.323289 | 0.849737 |
| Viet Nam                           | 2009 | 1.321261 | 0.852674 |
| Viet Nam                           | 2010 | 1.328771 | 0.860246 |

|    |          |      |          |          |
|----|----------|------|----------|----------|
| 1  |          |      |          |          |
| 2  |          |      |          |          |
| 3  |          |      |          |          |
| 4  |          |      |          |          |
| 5  | Viet Nam | 2011 | 1.341013 | 0.87573  |
| 6  | Viet Nam | 2012 | 1.354551 | 0.89126  |
| 7  | Viet Nam | 2013 | 1.369053 | 0.906847 |
| 8  | Viet Nam | 2014 | 1.387531 | 0.923227 |
| 9  | Viet Nam | 2015 | 1.409908 | 0.938181 |
| 10 | Viet Nam | 2016 | 1.431575 | 0.953848 |
| 11 | Viet Nam | 2017 | 1.459148 | 0.972659 |
| 12 | Viet Nam | 2018 | 1.486234 | 0.990891 |
| 13 | Viet Nam | 2019 | 1.508687 | 1.006537 |
| 14 | Yemen    | 1990 | 0.981841 | 0.746822 |
| 15 | Yemen    | 1991 | 0.968788 | 0.745728 |
| 16 | Yemen    | 1992 | 0.950842 | 0.740663 |
| 17 | Yemen    | 1993 | 0.932491 | 0.735044 |
| 18 | Yemen    | 1994 | 0.913991 | 0.729153 |
| 19 | Yemen    | 1995 | 0.904266 | 0.730324 |
| 20 | Yemen    | 1996 | 0.896218 | 0.731679 |
| 21 | Yemen    | 1997 | 0.882889 | 0.728787 |
| 22 | Yemen    | 1998 | 0.870341 | 0.726354 |
| 23 | Yemen    | 1999 | 0.857908 | 0.723453 |
| 24 | Yemen    | 2000 | 0.847074 | 0.721681 |
| 25 | Yemen    | 2001 | 0.837908 | 0.720832 |
| 26 | Yemen    | 2002 | 0.832844 | 0.720939 |
| 27 | Yemen    | 2003 | 0.82958  | 0.723923 |
| 28 | Yemen    | 2004 | 0.828547 | 0.727283 |
| 29 | Yemen    | 2005 | 0.830121 | 0.733911 |
| 30 |          |      |          |          |
| 31 |          |      |          |          |
| 32 |          |      |          |          |
| 33 |          |      |          |          |
| 34 |          |      |          |          |
| 35 |          |      |          |          |
| 36 |          |      |          |          |
| 37 |          |      |          |          |
| 38 |          |      |          |          |
| 39 |          |      |          |          |
| 40 |          |      |          |          |
| 41 |          |      |          |          |
| 42 |          |      |          |          |
| 43 |          |      |          |          |
| 44 |          |      |          |          |
| 45 |          |      |          |          |
| 46 |          |      |          |          |

1  
2  
3  
4  
5  
6  
7  
8  
9  
10  
11  
12  
13  
14  
15  
16  
17  
18  
19  
20  
21  
22  
23  
24  
25  
26  
27  
28  
29  
30  
31  
32  
33  
34  
35  
36  
37  
38  
39  
40  
41  
42  
43  
44  
45  
46

|        |      |          |          |
|--------|------|----------|----------|
| Yemen  | 2006 | 0.829255 | 0.735995 |
| Yemen  | 2007 | 0.83175  | 0.740204 |
| Yemen  | 2008 | 0.832213 | 0.742458 |
| Yemen  | 2009 | 0.832872 | 0.745576 |
| Yemen  | 2010 | 0.835204 | 0.752401 |
| Yemen  | 2011 | 0.845055 | 0.763452 |
| Yemen  | 2012 | 0.853337 | 0.773794 |
| Yemen  | 2013 | 0.862728 | 0.784063 |
| Yemen  | 2014 | 0.869438 | 0.792211 |
| Yemen  | 2015 | 0.873679 | 0.798236 |
| Yemen  | 2016 | 0.879447 | 0.80375  |
| Yemen  | 2017 | 0.885689 | 0.808814 |
| Yemen  | 2018 | 0.891526 | 0.812253 |
| Yemen  | 2019 | 0.897097 | 0.814499 |
| Zambia | 1990 | 0.874025 | 0.844793 |
| Zambia | 1991 | 0.860211 | 0.835418 |
| Zambia | 1992 | 0.844285 | 0.825868 |
| Zambia | 1993 | 0.821036 | 0.808517 |
| Zambia | 1994 | 0.809962 | 0.801534 |
| Zambia | 1995 | 0.79626  | 0.791593 |
| Zambia | 1996 | 0.782948 | 0.782316 |
| Zambia | 1997 | 0.766796 | 0.76913  |
| Zambia | 1998 | 0.750685 | 0.754682 |
| Zambia | 1999 | 0.732818 | 0.737519 |
| Zambia | 2000 | 0.707935 | 0.712561 |

|          |      |          |          |
|----------|------|----------|----------|
| Zambia   | 2001 | 0.693031 | 0.695964 |
| Zambia   | 2002 | 0.677749 | 0.678508 |
| Zambia   | 2003 | 0.667889 | 0.664051 |
| Zambia   | 2004 | 0.659869 | 0.648766 |
| Zambia   | 2005 | 0.655895 | 0.638442 |
| Zambia   | 2006 | 0.660793 | 0.637345 |
| Zambia   | 2007 | 0.659858 | 0.631617 |
| Zambia   | 2008 | 0.660439 | 0.627202 |
| Zambia   | 2009 | 0.667305 | 0.629889 |
| Zambia   | 2010 | 0.679315 | 0.637493 |
| Zambia   | 2011 | 0.69254  | 0.647015 |
| Zambia   | 2012 | 0.707016 | 0.658908 |
| Zambia   | 2013 | 0.720994 | 0.669655 |
| Zambia   | 2014 | 0.729531 | 0.67707  |
| Zambia   | 2015 | 0.735597 | 0.683088 |
| Zambia   | 2016 | 0.741109 | 0.689189 |
| Zambia   | 2017 | 0.749312 | 0.697265 |
| Zambia   | 2018 | 0.752969 | 0.70141  |
| Zambia   | 2019 | 0.759635 | 0.707038 |
| Zimbabwe | 1990 | 0.661655 | 0.555791 |
| Zimbabwe | 1991 | 0.640232 | 0.541326 |
| Zimbabwe | 1992 | 0.610999 | 0.522021 |
| Zimbabwe | 1993 | 0.567077 | 0.49111  |
| Zimbabwe | 1994 | 0.515934 | 0.449828 |
| Zimbabwe | 1995 | 0.461896 | 0.404784 |

|          |      |          |          |
|----------|------|----------|----------|
| Zimbabwe | 1996 | 0.418462 | 0.364105 |
| Zimbabwe | 1997 | 0.392742 | 0.335841 |
| Zimbabwe | 1998 | 0.414159 | 0.346022 |
| Zimbabwe | 1999 | 0.449094 | 0.366171 |
| Zimbabwe | 2000 | 0.487121 | 0.389527 |
| Zimbabwe | 2001 | 0.512585 | 0.40252  |
| Zimbabwe | 2002 | 0.54821  | 0.423934 |
| Zimbabwe | 2003 | 0.584949 | 0.445465 |
| Zimbabwe | 2004 | 0.618119 | 0.464381 |
| Zimbabwe | 2005 | 0.616168 | 0.459484 |
| Zimbabwe | 2006 | 0.640547 | 0.473186 |
| Zimbabwe | 2007 | 0.658688 | 0.483898 |
| Zimbabwe | 2008 | 0.694945 | 0.507221 |
| Zimbabwe | 2009 | 0.7293   | 0.52948  |
| Zimbabwe | 2010 | 0.733864 | 0.532571 |
| Zimbabwe | 2011 | 0.724001 | 0.525821 |
| Zimbabwe | 2012 | 0.727939 | 0.527944 |
| Zimbabwe | 2013 | 0.739323 | 0.534652 |
| Zimbabwe | 2014 | 0.759521 | 0.547145 |
| Zimbabwe | 2015 | 0.758458 | 0.546135 |
| Zimbabwe | 2016 | 0.756162 | 0.544612 |
| Zimbabwe | 2017 | 0.757829 | 0.544924 |
| Zimbabwe | 2018 | 0.757228 | 0.54387  |
| Zimbabwe | 2019 | 0.757349 | 0.543382 |

## STROBE Statement—checklist of items that should be included in reports of observational studies

|                              | Item No                                                                                                                                                                                                                                                                                                   | Recommendation                                                                                                                                                                                                                                                                                                                                                                                                                                                         | Page No |
|------------------------------|-----------------------------------------------------------------------------------------------------------------------------------------------------------------------------------------------------------------------------------------------------------------------------------------------------------|------------------------------------------------------------------------------------------------------------------------------------------------------------------------------------------------------------------------------------------------------------------------------------------------------------------------------------------------------------------------------------------------------------------------------------------------------------------------|---------|
| <b>Title and abstract</b>    | 1                                                                                                                                                                                                                                                                                                         | (a) Indicate the study's design with a commonly used term in the title or the abstract                                                                                                                                                                                                                                                                                                                                                                                 | 2       |
|                              |                                                                                                                                                                                                                                                                                                           | (b) Provide in the abstract an informative and balanced summary of what was done and what was found                                                                                                                                                                                                                                                                                                                                                                    | 2       |
| <b>Introduction</b>          |                                                                                                                                                                                                                                                                                                           |                                                                                                                                                                                                                                                                                                                                                                                                                                                                        |         |
| Background/rationale         | 2                                                                                                                                                                                                                                                                                                         | Explain the scientific background and rationale for the investigation being reported                                                                                                                                                                                                                                                                                                                                                                                   | 4       |
| Objectives                   | 3                                                                                                                                                                                                                                                                                                         | State specific objectives, including any prespecified hypotheses                                                                                                                                                                                                                                                                                                                                                                                                       | 4       |
| <b>Methods</b>               |                                                                                                                                                                                                                                                                                                           |                                                                                                                                                                                                                                                                                                                                                                                                                                                                        |         |
| Study design                 | 4                                                                                                                                                                                                                                                                                                         | Present key elements of study design early in the paper                                                                                                                                                                                                                                                                                                                                                                                                                | 4       |
| Setting                      | 5                                                                                                                                                                                                                                                                                                         | Describe the setting, locations, and relevant dates, including periods of recruitment, exposure, follow-up, and data collection                                                                                                                                                                                                                                                                                                                                        | 4       |
| Participants                 | 6                                                                                                                                                                                                                                                                                                         | (a) <i>Cohort study</i> —Give the eligibility criteria, and the sources and methods of selection of participants. Describe methods of follow-up<br><i>Case-control study</i> —Give the eligibility criteria, and the sources and methods of case ascertainment and control selection. Give the rationale for the choice of cases and controls<br><i>Cross-sectional study</i> —Give the eligibility criteria, and the sources and methods of selection of participants | 4       |
|                              |                                                                                                                                                                                                                                                                                                           | (b) <i>Cohort study</i> —For matched studies, give matching criteria and number of exposed and unexposed<br><i>Case-control study</i> —For matched studies, give matching criteria and the number of controls per case                                                                                                                                                                                                                                                 | NA      |
| Variables                    | 7                                                                                                                                                                                                                                                                                                         | Clearly define all outcomes, exposures, predictors, potential confounders, and effect modifiers. Give diagnostic criteria, if applicable                                                                                                                                                                                                                                                                                                                               | NA      |
| Data sources/<br>measurement | 8*                                                                                                                                                                                                                                                                                                        | For each variable of interest, give sources of data and details of methods of assessment (measurement). Describe comparability of assessment methods if there is more than one group                                                                                                                                                                                                                                                                                   | 4       |
| Bias                         | 9                                                                                                                                                                                                                                                                                                         | Describe any efforts to address potential sources of bias                                                                                                                                                                                                                                                                                                                                                                                                              | NA      |
| Study size                   | 10                                                                                                                                                                                                                                                                                                        | Explain how the study size was arrived at                                                                                                                                                                                                                                                                                                                                                                                                                              | NA      |
| Quantitative variables       | 11                                                                                                                                                                                                                                                                                                        | Explain how quantitative variables were handled in the analyses. If applicable, describe which groupings were chosen and why                                                                                                                                                                                                                                                                                                                                           | NA      |
| Statistical methods          | 12                                                                                                                                                                                                                                                                                                        | (a) Describe all statistical methods, including those used to control for confounding                                                                                                                                                                                                                                                                                                                                                                                  | 4, 5    |
|                              |                                                                                                                                                                                                                                                                                                           | (b) Describe any methods used to examine subgroups and interactions                                                                                                                                                                                                                                                                                                                                                                                                    | 4, 5    |
|                              | (c) Explain how missing data were addressed                                                                                                                                                                                                                                                               | NA                                                                                                                                                                                                                                                                                                                                                                                                                                                                     |         |
|                              | (d) <i>Cohort study</i> —If applicable, explain how loss to follow-up was addressed<br><i>Case-control study</i> —If applicable, explain how matching of cases and controls was addressed<br><i>Cross-sectional study</i> —If applicable, describe analytical methods taking account of sampling strategy | NA                                                                                                                                                                                                                                                                                                                                                                                                                                                                     |         |
|                              | (e) Describe any sensitivity analyses                                                                                                                                                                                                                                                                     | NA                                                                                                                                                                                                                                                                                                                                                                                                                                                                     |         |

Continued on next page



1  
2  
3  
4  
5  
6  
7  
8  
9  
10  
11  
12  
13  
14  
15  
16  
17  
18  
19  
20  
21  
22  
23  
24  
25  
26  
27  
28  
29  
30  
31  
32  
33  
34  
35  
36  
37  
38  
39  
40  
41  
42  
43  
44  
45  
46  
47  
48  
49  
50  
51  
52  
53  
54  
55  
56  
57  
58  
59  
60**Results**

|                  |     |                                                                                                                                                                                                              |      |
|------------------|-----|--------------------------------------------------------------------------------------------------------------------------------------------------------------------------------------------------------------|------|
| Participants     | 13* | (a) Report numbers of individuals at each stage of study—eg numbers potentially eligible, examined for eligibility, confirmed eligible, included in the study, completing follow-up, and analysed            | 5, 6 |
|                  |     | (b) Give reasons for non-participation at each stage                                                                                                                                                         | NA   |
|                  |     | (c) Consider use of a flow diagram                                                                                                                                                                           | NA   |
| Descriptive data | 14* | (a) Give characteristics of study participants (eg demographic, clinical, social) and information on exposures and potential confounders                                                                     | 5, 6 |
|                  |     | (b) Indicate number of participants with missing data for each variable of interest                                                                                                                          | NA   |
|                  |     | (c) <i>Cohort study</i> —Summarise follow-up time (eg, average and total amount)                                                                                                                             | NA   |
| Outcome data     | 15* | <i>Cohort study</i> —Report numbers of outcome events or summary measures over time                                                                                                                          | 5    |
|                  |     | <i>Case-control study</i> —Report numbers in each exposure category, or summary measures of exposure                                                                                                         | NA   |
|                  |     | <i>Cross-sectional study</i> —Report numbers of outcome events or summary measures                                                                                                                           | NA   |
| Main results     | 16  | (a) Give unadjusted estimates and, if applicable, confounder-adjusted estimates and their precision (eg, 95% confidence interval). Make clear which confounders were adjusted for and why they were included | 5-8  |
|                  |     | (b) Report category boundaries when continuous variables were categorized                                                                                                                                    | NA   |
|                  |     | (c) If relevant, consider translating estimates of relative risk into absolute risk for a meaningful time period                                                                                             | NA   |
| Other analyses   | 17  | Report other analyses done—eg analyses of subgroups and interactions, and sensitivity analyses                                                                                                               | NA   |

**Discussion**

|                  |    |                                                                                                                                                                            |      |
|------------------|----|----------------------------------------------------------------------------------------------------------------------------------------------------------------------------|------|
| Key results      | 18 | Summarise key results with reference to study objectives                                                                                                                   | 5-8  |
| Limitations      | 19 | Discuss limitations of the study, taking into account sources of potential bias or imprecision. Discuss both direction and magnitude of any potential bias                 | 10   |
| Interpretation   | 20 | Give a cautious overall interpretation of results considering objectives, limitations, multiplicity of analyses, results from similar studies, and other relevant evidence | 10   |
| Generalisability | 21 | Discuss the generalisability (external validity) of the study results                                                                                                      | 8-10 |

**Other information**

|         |    |                                                                                                                                                               |    |
|---------|----|---------------------------------------------------------------------------------------------------------------------------------------------------------------|----|
| Funding | 22 | Give the source of funding and the role of the funders for the present study and, if applicable, for the original study on which the present article is based | 11 |
|---------|----|---------------------------------------------------------------------------------------------------------------------------------------------------------------|----|

\*Give information separately for cases and controls in case-control studies and, if applicable, for exposed and unexposed groups in cohort and cross-sectional studies.

**Note:** An Explanation and Elaboration article discusses each checklist item and gives methodological background and published examples of transparent reporting. The STROBE checklist is best used in conjunction with this article (freely available on the Web sites of PLoS Medicine at <http://www.plosmedicine.org/>, Annals of Internal Medicine at <http://www.annals.org/>, and Epidemiology at <http://www.epidem.com/>). Information on the STROBE Initiative is available at [www.strobe-statement.org](http://www.strobe-statement.org).

# BMJ Open

## Secular Trends of Epidemiologic Patterns of Chronic Kidney Disease Over Three Decades: An Updated Analysis of the Global Burden of Disease Study 2019

|                                 |                                                                                                                                                                                                                                                                                                                                                                                                                                                                                                                                                                                                                                                                                                                                                                                                                                                                                                                                                                                                                                                                                                                                                               |
|---------------------------------|---------------------------------------------------------------------------------------------------------------------------------------------------------------------------------------------------------------------------------------------------------------------------------------------------------------------------------------------------------------------------------------------------------------------------------------------------------------------------------------------------------------------------------------------------------------------------------------------------------------------------------------------------------------------------------------------------------------------------------------------------------------------------------------------------------------------------------------------------------------------------------------------------------------------------------------------------------------------------------------------------------------------------------------------------------------------------------------------------------------------------------------------------------------|
| Journal:                        | <i>BMJ Open</i>                                                                                                                                                                                                                                                                                                                                                                                                                                                                                                                                                                                                                                                                                                                                                                                                                                                                                                                                                                                                                                                                                                                                               |
| Manuscript ID                   | bmjopen-2022-064540.R1                                                                                                                                                                                                                                                                                                                                                                                                                                                                                                                                                                                                                                                                                                                                                                                                                                                                                                                                                                                                                                                                                                                                        |
| Article Type:                   | Original research                                                                                                                                                                                                                                                                                                                                                                                                                                                                                                                                                                                                                                                                                                                                                                                                                                                                                                                                                                                                                                                                                                                                             |
| Date Submitted by the Author:   | 10-Dec-2022                                                                                                                                                                                                                                                                                                                                                                                                                                                                                                                                                                                                                                                                                                                                                                                                                                                                                                                                                                                                                                                                                                                                                   |
| Complete List of Authors:       | Feng, Xiaojin; Affiliated Hospital of Weifang Medical University, Department of Endocrinology and Metabolism; Affiliated Hospital of Weifang Medical University, Department of Clinical Research Center<br>Hou, Ningning; Affiliated Hospital of Weifang Medical University, Department of Endocrinology and Metabolism<br>Chen, Zhenna; Affiliated Hospital of Weifang Medical University, Department of Ophthalmology<br>Liu, Jing; The Second Affiliated Hospital of Shaanxi University of Chinese Medicine, Department of Cardiovascular Medicine<br>Li, Xue; Affiliated Hospital of Weifang Medical University, Department of Clinical Research Center; Affiliated Hospital of Weifang Medical University, Department of Pathology<br>Sun, Xiaodong; Affiliated Hospital of Weifang Medical University, Department of Endocrinology and Metabolism; Affiliated Hospital of Weifang Medical University, Department of Clinical Research Center<br>Liu, Yongping; Affiliated Hospital of Weifang Medical University, Department of Endocrinology and Metabolism; Affiliated Hospital of Weifang Medical University, Department of Clinical Research Center |
| <b>Primary Subject Heading</b>: | Global health                                                                                                                                                                                                                                                                                                                                                                                                                                                                                                                                                                                                                                                                                                                                                                                                                                                                                                                                                                                                                                                                                                                                                 |
| Secondary Subject Heading:      | Epidemiology, Global health                                                                                                                                                                                                                                                                                                                                                                                                                                                                                                                                                                                                                                                                                                                                                                                                                                                                                                                                                                                                                                                                                                                                   |
| Keywords:                       | PUBLIC HEALTH, EPIDEMIOLOGY, Chronic renal failure < NEPHROLOGY                                                                                                                                                                                                                                                                                                                                                                                                                                                                                                                                                                                                                                                                                                                                                                                                                                                                                                                                                                                                                                                                                               |
|                                 |                                                                                                                                                                                                                                                                                                                                                                                                                                                                                                                                                                                                                                                                                                                                                                                                                                                                                                                                                                                                                                                                                                                                                               |

SCHOLARONE™  
Manuscripts



I, the Submitting Author has the right to grant and does grant on behalf of all authors of the Work (as defined in the below author licence), an exclusive licence and/or a non-exclusive licence for contributions from authors who are: i) UK Crown employees; ii) where BMJ has agreed a CC-BY licence shall apply, and/or iii) in accordance with the terms applicable for US Federal Government officers or employees acting as part of their official duties; on a worldwide, perpetual, irrevocable, royalty-free basis to BMJ Publishing Group Ltd ("BMJ") its licensees and where the relevant Journal is co-owned by BMJ to the co-owners of the Journal, to publish the Work in this journal and any other BMJ products and to exploit all rights, as set out in our [licence](#).

The Submitting Author accepts and understands that any supply made under these terms is made by BMJ to the Submitting Author unless you are acting as an employee on behalf of your employer or a postgraduate student of an affiliated institution which is paying any applicable article publishing charge ("APC") for Open Access articles. Where the Submitting Author wishes to make the Work available on an Open Access basis (and intends to pay the relevant APC), the terms of reuse of such Open Access shall be governed by a Creative Commons licence – details of these licences and which [Creative Commons](#) licence will apply to this Work are set out in our licence referred to above.

Other than as permitted in any relevant BMJ Author's Self Archiving Policies, I confirm this Work has not been accepted for publication elsewhere, is not being considered for publication elsewhere and does not duplicate material already published. I confirm all authors consent to publication of this Work and authorise the granting of this licence.

# Secular Trends of Epidemiologic Patterns of Chronic Kidney Disease Over Three Decades: An Updated Analysis of the Global Burden of Disease Study 2019

1 **Xiaojin Feng<sup>1,2†</sup>, Ningning Hou<sup>1†</sup>, Zhenna Chen<sup>3†</sup>, Jing Liu<sup>4</sup>, Xue Li<sup>2,5</sup>, Xiaodong**  
2 **Sun<sup>1,2\*</sup>, and Yongping Liu<sup>1,2\*</sup>**

3 <sup>1</sup>Department of Endocrinology and Metabolism, Affiliated Hospital of Weifang  
4 Medical University, Weifang, China

5 <sup>2</sup>Department of Clinical Research Center, Affiliated Hospital of Weifang Medical  
6 University, Weifang, China

7 <sup>3</sup>Department of Ophthalmology, Affiliated Hospital of Weifang Medical University,  
8 Weifang, China

9 <sup>4</sup>Department of Cardiovascular Medicine, The Second Affiliated Hospital of Shaanxi  
10 University of Chinese Medicine, Xianyang, China

11 <sup>5</sup>Department of Pathology, Affiliated Hospital of Weifang Medical University,  
12 Weifang, China

13 †These authors have contributed equally to this work and share first authorship

## 14 \* Correspondence:

15 Yongping Liu, M.D., Ph.D., Department of Endocrinology and Metabolism,  
16 Affiliated Hospital of Weifang Medical University, No. 2428 Yuhe Road, Weifang,  
17 Shandong, 261000, China. Email: lypfree@hotmail.com

18 Xiaodong Sun, M.D., Ph.D., Department of Endocrinology and Metabolism,  
19 Affiliated Hospital of Weifang Medical University, No. 2428 Yuhe Road, Weifang,  
20 Shandong, 261000, China. Email: xiaodong.sun@wfmc.edu.cn

21 Word count: 3874

22 **Keywords: Chronic kidney disease, global burden of disease, death, aging, risk**  
23 **factors**

24

1  
2  
3 25 **Abstract**

4 26 **Objectives:** To assess the characteristics of the global death burden imposed by CKD  
5 27 and the attributable risk factors from 1990 to 2019 to help inform a framework for  
6 28 policy discussions, resource allocation and research priorities.

7 29 **Design:** A population-based observational study.

8 30 **Setting:** The death data and relative risk factors were obtained from the Global  
9 31 Burden of Disease Study 2019 database.

10 32 **Main outcome measures:** Based on the CBD database, we estimated the death  
11 33 burden attributable to CKD stratified by sociodemographic index (SDI), geographic  
12 34 location, sex, age group, time period and risk factors from 1990 to 2019.

13 35 **Results:** Over 3-decade study period, the global number of CKD-related deaths  
14 36 increased from 0.60 million (95% UI: 0.57-0.63 million) in 1990 to 1.43 million (95%  
15 37 UI: 1.31-1.52 million) in 2019. The age-standardized death rate (ASDR) of CKD,  
16 38 among all causes, increased from 15th in 1990 to 10th in 2019. Globally, the ASDR in  
17 39 males was higher than that in females. CKD-related deaths mainly occurred in those  
18 40 aged over 50 years, especially in regions with higher SDIs. The ASDR was negatively  
19 41 related to SDI ( $\rho = -0.603$ ,  $P < 0.0001$ ). Among risk factors, metabolic risk factors,  
20 42 especially systolic blood pressure (SBP), fasting plasma glucose (FPG) and body  
21 43 mass index (BMI), were the main contributors to CKD-related deaths. Although the  
22 44 high-temperature-related death burden was low, the trend increased sharply in lower  
23 45 SDI regions.

24 46 **Conclusions:** CKD-related deaths continue to increase, with the majority occurring in  
25 47 elderly adults. The CKD-related death burden is higher in men than in women.  
26 48 Additionally, the increasing high-temperature-related death burdens in lower SDI  
27 49 regions should receive social attention.  
28  
29  
30  
31  
32  
33  
34  
35  
36  
37  
38  
39  
40  
41  
42  
43  
44  
45  
46  
47  
48  
49  
50

1  
2  
3  
4  
5  
6  
7  
8  
9  
10  
11  
12  
13  
14  
15  
16  
17  
18  
19  
20  
21  
22  
23  
24  
25  
26  
27  
28  
29  
30  
31  
32  
33  
34  
35  
36  
37  
38  
39  
40  
41  
42  
43  
44  
45  
46  
47  
48  
49  
50  
51  
52  
53  
54  
55  
56  
57  
58  
59  
60

**Strengths and limitations of this study**

- This study evaluated the disease burden changing trends of chronic kidney disease over the past three decades.
- The disease burden changing trends and the relative risk factors of CKD were quantified to reveal the extent of the epidemic and suggest a framework for policy discussions, resource allocation and research priorities.
- Data on the impact of metabolic factors other than blood pressure and blood glucose, such as triglycerides, cholesterol or uric acid, on the global burden of CKD are lacking.

For peer review only

## 61 INTRODUCTION

62 Chronic kidney disease (CKD) refers to chronic renal dysfunction caused by various  
63 factors for more than 3 months.[1, 2] According to relevant statistics, there were an  
64 estimated 697.5 million cases of CKD worldwide in 2017.[1] The prevalence of CKD  
65 has increased with the aging of the population and has become a global public health  
66 problem.[3] The incidence rate increased by 29.3% compared with that in 1990[1].  
67 Once diagnosed with CKD, the kidney function would gradually decline until the end-  
68 stage renal disease or even death, with little chance of reversal, imposing a heavy  
69 economic burden on society.

70 Studies have found that the sociodemographic index (SDI), human development level,  
71 economic situation, and health access and quality index are closely related to the CKD  
72 incidence.[4-7] Complex influencing factors make the diagnosis and treatment of  
73 CKD difficult, which seriously increases the public health burden.[8, 9] Although  
74 several studies on CKD have been conducted,[1, 10] detailed death burden analyses of  
75 recent 3-decade period are scarce and need to be further studied.

76 In the context of current global Big Data, deep quantitative analyses of CKD  
77 morbidity and mortality and their influencing factors are crucial in guiding decisions  
78 by policymakers and health care providers. However, the details of CKD-related  
79 mortality have been poorly studied worldwide. Considering these factors, we carried  
80 out research on the global CKD-related death burden and related risk factors from  
81 1990-2019. We also analyzed the numbers of deaths caused by CKD and the age-  
82 standardized death rates (ASDRs) by time period, region, age, risk factors and sex.

## 84 MATERIALS AND METHODS

### 85 Study data

86 Data analyzed in the present study were obtained from the online database the Global  
87 Health Data Exchange (GHDx) query tool ([http://ghdx.healthdata.org/gbd-results-  
88 tool](http://ghdx.healthdata.org/gbd-results-tool)), which were based on literature studies, survey data, surveillance data, medical  
89 records, health insurance claims and statistical model analysis.[11] The database  
90 provides epidemiological data about 369 diseases and 87 attributable risk factors in  
91 204 countries and territories from January 1, 1990 to December 31, 2019,  
92 disaggregated by time, location and sex, and is constantly updated by ongoing  
93 multinational cooperative organizations.[12, 13] Detailed research methods followed  
94 the Global Burden of Disease study (GBD) 2019.[12, 13] The SDI, based on fertility,  
95 income per capita and educational attainment, was used as a composite indicator of  
96 the degree of health-related development at the national or regional level. The SDI  
97 value ranges from 0 to 1, and all the countries were classified into five SDI regions:  
98 low-, low-middle-, middle-, high-middle- and high-SDI regions, according to the SDI  
99 quintiles. Regions with a lower value indicating a lower degree of development  
100 associated with health outcomes. In addition, countries were divided into 21 regions  
101 according to geographical location. Age-standardized rates (ASRs) based on the  
102 updated standard population were also available in the GBD 2019, allowing the



1  
2  
3 103 analysis of CKD according to age structure and population size.

#### 4 104 **Statistical analysis**

5 105 Numbers and ASDRs, and associated 95% uncertainty intervals (UIs) provided by  
6 106 GBDx, were analyzed to quantify the CKD-related death burden attributed to risk  
7 107 factors. Ninety-five percent UI values fell between the 2.5th and 97.5th percentiles of  
8 108 1000 samples that were extracted from the posterior distribution in the modeling  
9 109 process.[14] The time trend of an ASR over a specified time period were represented  
10 110 by the estimated annual percentage change (EAPC), which detailed calculation  
11 111 method has been reported in many previously published GBD studies.[15, 16] In  
12 112 brief, the natural logarithm of the ASR is assumed to be linear over time; therefore,  
13 113  $\ln(\text{ASR}) = \alpha + \beta \times (\text{calendar year}) + \text{error term}$ . The  $\text{EAPC} = 100 \times (\exp(\beta) - 1)$ , and the  
14 114 95% confidence interval (95% CI) can be obtained from the linear regression model.  
15 115 To assess the trends of data over time from 1990 to 2019, Joinpoint trend analyses  
16 116 were performed by fitting several different line segments on a logarithmic scale with  
17 117 the simplest model. Significant changes were identified by permutation tests and  
18 118 estimated by the Monte Carlo method. A *P* value less than 0.05 was used to denote to  
19 119 be statistical significance.

20 120 All statistical and graphical analyses were carried out using R version 4.1.2 (Vienna,  
21 121 Austria), Joinpoint software version 4.9.0.1 (National Cancer Institute, USA) and  
22 122 GraphPad Prism 8 (California, USA).

#### 23 123 **Patient and Public Involvement**

24 124 Patients or the public were not involved in this study.

25 125

## 26 126 **RESULTS**

### 27 127 **1. Global burden of chronic kidney disease**

28 128 Globally, there were an estimated 697.3 million CKD cases and 19.0 million incident  
29 129 cases in 2019, both of which were more than twice those in 1990 (supplementary  
30 130 table 1, supplementary table 2, supplementary figure 1a and supplementary figure 1b).  
31 131 The number of deaths caused by CKD doubled from 0.6 million (95% UI: 0.57-0.63  
32 132 million) in 1990 to 1.4 million (95% UI: 1.31-1.52 million) in 2019 (table 1; figure  
33 133 1a). Among all the causes of death, the percentage of deaths due to CKD doubled  
34 134 from 1.3% to 2.5%. The numbers of deaths caused by CKD increased from 19th in  
35 135 1990 to 11th in 2019 (supplementary figure 2a), and the ASDR increased from 15th to  
36 136 10th (supplementary figure 2b). Global DALYs also doubled from 21.5 million in  
37 137 1990 to 41.5 million in 2019 (supplementary table 3 and supplementary figure 1c).  
38 138 During this period, the age-standardized incidence rate (ASIR) increased over time,  
39 139 with an EAPC of 3.2 (95% CI: 3.11 to 3.19) (supplementary table 2, supplementary  
40 140 figure 3). The ASDR, DALYs, YLLs and YLDs showed upward trends in the first  
41 141 half of the study period but downward trends in the latter years according to the  
42 142 Joinpoint analyses (figure 1b right, supplementary figure 3). These trends were  
43 143 consistent in both the male and female (supplementary figure 3).

44 144



145 **Table 1.** Death cases and age-standardized death rates of chronic kidney disease in 1990 and  
 146 2019, and the temporal trends from 1990 to 2019.

|                              | 1990                                      |                                         | 2019                                      |                                            | 1990-2019                |
|------------------------------|-------------------------------------------|-----------------------------------------|-------------------------------------------|--------------------------------------------|--------------------------|
| Characteristics              | Death cases ( $\times 10^3$ )<br>(95% UI) | ASDR per 100,000<br>population (95% UI) | Death cases ( $\times 10^3$ )<br>(95% UI) | ASDR per 100,000<br>population (95%<br>UI) | EAPC of ASDR<br>(95% CI) |
| Global                       | 601.31 (567.6-633.79)                     | 16.14 (15.13-17.13)                     | 1427.23 (1313.73-<br>1524.55)             | 18.29 (16.72-19.55)                        | 0.55 (0.46 to 0.64)      |
| <b>Gender</b>                |                                           |                                         |                                           |                                            |                          |
| Males                        | 313.94 (293.38-338.57)                    | 19.55 (18.19-21.18)                     | 741.38 (685.84-801.7)                     | 21.59 (19.93-23.27)                        | 0.55 (0.46 to 0.64)      |
| Females                      | 287.37 (268.8-305.44)                     | 13.89 (12.91-14.79)                     | 685.85 (614.92-741.57)                    | 15.8 (14.17-17.09)                         | 0.55 (0.46 to 0.64)      |
| <b>SDI regions</b>           |                                           |                                         |                                           |                                            |                          |
| Low                          | 62.02 (55.89-68.54)                       | 27.21 (24.08-30.65)                     | 125.07 (112.78-137.96)                    | 25.28 (22.9-27.68)                         | -0.27 (-0.31 to -0.22)   |
| Low-middle                   | 126.51 (114.96-138.84)                    | 21.9 (19.73-24.25)                      | 293.49 (265.9-320.13)                     | 22.95 (20.77-25.04)                        | 0.14 (0.01 to 0.26)      |
| Middle                       | 196.59 (183.72-209.89)                    | 21.01 (19.54-22.84)                     | 506.13 (464.49-547.47)                    | 22.8 (20.79-24.75)                         | 0.43 (0.36 to 0.5)       |
| High-middle                  | 116.33 (109.59-124.18)                    | 12.25 (11.42-13.2)                      | 227.99 (207.02-244.66)                    | 11.78 (10.65-12.65)                        | -0.08 (-0.22 to 0.06)    |
| High                         | 99.47 (92.56-103.08)                      | 9.61 (8.92-9.98)                        | 273.59 (236.92-294.76)                    | 12.58 (11.09-13.47)                        | 1.21 (1.09 to 1.32)      |
| <b>21 GBD regions</b>        |                                           |                                         |                                           |                                            |                          |
| Central Asia                 | 5.04 (4.73-5.75)                          | 10.01 (9.33-11.63)                      | 10.38 (9.43-11.49)                        | 14.75 (13.48-16.17)                        | 1.11 (0.73 to 1.49)      |
| Central Europe               | 13.14 (12.7-13.56)                        | 9.62 (9.22-9.93)                        | 18.76 (16.33-21.22)                       | 8.61 (7.5-9.74)                            | -0.23 (-0.36 to -0.11)   |
| Eastern Europe               | 11.06 (10.74-11.35)                       | 4.41 (4.25-4.53)                        | 15.93 (14.23-17.56)                       | 4.85 (4.34-5.34)                           | -0.16 (-0.42 to 0.09)    |
| Australasia                  | 2.02 (1.85-2.14)                          | 9.27 (8.39-9.87)                        | 6.12 (5.14-6.85)                          | 10.77 (9.17-12)                            | 0.7 (0.62 to 0.78)       |
| High-income Asia<br>Pacific  | 22.94 (21.27-23.86)                       | 13.12 (12.01-13.73)                     | 54.14 (42.82-60.58)                       | 9.13 (7.54-10.06)                          | -1.35 (-1.43 to -1.28)   |
| High-income North<br>America | 35.75 (32.89-37.2)                        | 9.79 (9.03-10.18)                       | 114.46 (102.38-122.48)                    | 16.88 (15.26-17.98)                        | 2.26 (2.07 to 2.45)      |

147

|                              |                       |                     |                        |                     |                        |
|------------------------------|-----------------------|---------------------|------------------------|---------------------|------------------------|
| Southern Latin America       | 8.99 (8.51-9.42)      | 20.79 (19.61-21.83) | 21.69 (19.81-23.33)    | 25.45 (23.27-27.34) | 0.72 (0.43 to 1.02)    |
| Western Europe               | 49.78 (46.2-51.89)    | 8.49 (7.86-8.87)    | 116.66 (99.12-126.16)  | 9.97 (8.58-10.73)   | 0.98 (0.86 to 1.1)     |
| Andean Latin America         | 5.24 (4.78-5.74)      | 25.51 (23.13-28.1)  | 19.38 (16.14-22.96)    | 35.68 (29.73-42.21) | 1.37 (1.07 to 1.67)    |
| Caribbean                    | 4.79 (4.47-5.28)      | 18.59 (17.28-20.52) | 12.66 (10.85-14.78)    | 24.58 (21.08-28.71) | 1.44 (1.31 to 1.58)    |
| Central Latin America        | 20.7 (19.77-21.36)    | 25.77 (24.22-26.76) | 111.71 (98.57-125.86)  | 48.11 (42.52-54.16) | 2.42 (2.09 to 2.74)    |
| Tropical Latin America       | 16.59 (15.87-17.14)   | 19.36 (18.16-20.14) | 44.22 (40.46-46.73)    | 18.96 (17.25-20.06) | 0.01 (-0.06 to 0.09)   |
| North Africa and Middle East | 52.6 (47.64-61.84)    | 34.74 (30.67-44.08) | 111.81 (96.42-130.85)  | 30.37 (26.34-35.39) | -0.43 (-0.51 to -0.34) |
| South Asia                   | 117.5 (100.02-134.35) | 22.21 (18.57-25.75) | 285.34 (248.21-324.6)  | 21.56 (18.82-24.36) | -0.3 (-0.51 to -0.08)  |
| East Asia                    | 104.32 (92.79-116.88) | 13.28 (11.9-14.75)  | 209.29 (179.98-237.7)  | 11.55 (9.99-13.05)  | -0.21 (-0.32 to -0.1)  |
| Oceania                      | 0.62 (0.53-0.72)      | 20.82 (18.22-23.98) | 1.6 (1.32-1.93)        | 23.8 (20.26-27.96)  | 0.31 (0.12 to 0.49)    |
| Southeast Asia               | 68.7 (63.3-74.86)     | 27.38 (24.96-30.14) | 153.37 (137.32-169.64) | 27.79 (24.63-30.68) | 0.06 (0 to 0.12)       |
| Central Sub-Saharan Africa   | 6.45 (5.47-7.54)      | 30.32 (25.81-34.98) | 12.36 (9.7-15.19)      | 25.87 (19.78-31.73) | -0.64 (-0.68 to -0.61) |
| Eastern Sub-Saharan Africa   | 21.64 (19.01-24.17)   | 29.43 (25.56-33.33) | 38.6 (34.23-43.26)     | 26.24 (23.43-29.23) | -0.5 (-0.55 to -0.46)  |
| Southern Sub-Saharan Africa  | 6.18 (5.58-7.05)      | 23.04 (20.68-26.41) | 16.27 (14.95-17.65)    | 32.44 (29.77-35.1)  | 1.31 (0.95 to 1.66)    |
| Western Sub-Saharan Africa   | 27.27 (23.36-32.18)   | 31.88 (27.56-37.76) | 52.47 (44.11-61.28)    | 29.35 (25.21-33.71) | -0.21 (-0.25 to -0.17) |

148 SDI: sociodemographic index; ASDR: age-standardized death rate; EAPC: estimated annual  
 149 percentage change; UI: uncertainty interval; CI: confidence interval.

150

151 Of the total DALYs caused by CKD, which is consisted of years of life lost  
 152 prematurely (YLLs) and years lived with disability (YLDs), YLLs accounted for  
 153 78.9%, while YLDs accounted for 21.1% in 2019. As the overall death burden was  
 154 mainly attributed to disease-related deaths, we focused subsequent analyses mainly on  
 155 the CKD-related death burden. During the three decades, all five SDI regions showed  
 156 increases in the numbers of deaths over time (figure 1b left). Among them, the  
 157 middle-SDI region showed the highest death numbers, reaching 0.5 million, and the

1  
2  
3 158 low-SDI region had the lowest, with 0.1 million, in 2019 (figure 1a and 1b left). The  
4 159 ASDR in the high-SDI region increased dramatically, with an EAPC of 1.2 (95% CI:  
5 160 1.09 to 1.32), and exceeded that of the high-middle-SDI from 2011 onward (figure 1b  
6 161 right). In contrast, the low-SDI region still had the highest ASDR in 2019, at 25.3 per  
7 162 100,000 population (95% UI: 22.90-27.68), although it had the most significant  
8 163 declining trend (EAPC: -0.27, 95% CI: -0.31 to -0.22) (figure 1b right). The ASDR  
9 164 was negatively correlated with SDI level worldwide ( $\rho = -0.603$ ,  $P < 0.0001$ , figure  
10 165 1c), while the ASIR was positively correlated with SDI level ( $\rho = 0.54$ ,  $P < 0.0001$ ,  
11 166 supplementary figure 4).

12 167 At the regional level, death numbers in all 21 regions and the ASDRs in most regions  
13 168 showed increasing trends during this period (figure 1d). At the country level, CKD-  
14 169 related deaths increased by more than 500% in the United Arab Emirates, Venezuela,  
15 170 Estonia, Armenia, El Salvador and Ecuador over the three-decade study period  
16 171 (supplementary table 4). India (0.22 [95% UI: 0.19-0.26] million) surpassed inland  
17 172 China (0.2 [95% UI: 0.17-0.23] million) to be the largest number of CKD-related  
18 173 deaths in 2019. The number of deaths in the United States of America (0.11 [95% UI:  
19 174 0.10-0.11] million) were second to only those in India and China. The total number of  
20 175 deaths for these three countries accounted for 36.9% of the worldwide number of  
21 176 deaths in 2019 (figure 1e, supplementary figure 5). Nicaragua had the largest ASDR,  
22 177 at 80.2 (95% UI: 69.57-83.24) per 100,000 population (figure 1f, supplementary table  
23 178 4). Estonia showed the fastest increase in the ASDR with an EAPC of 5.4 (95% CI:  
24 179 4.91 to 5.81) during this period (figure 1g, supplementary table 4). While Mongolia  
25 180 had the fastest decrease in the ASDR of CKD (EAPC: -3.6, 95% UI: -4.07 to -3.12)  
26 181 (figure 1g, supplementary table 4).

## 182 **2. The CKD-related death burden in males was higher than that in females in** 183 **relatively high SDI regions**

184 Generally, the number of CKD-related deaths was larger in males than in females  
185 over the past 3 decades (figure 2a). At the SDI level, even though both showed  
186 increasing trends, the difference slightly narrowed with time, with the ratio of female  
187 deaths to male deaths changing from 0.9 in 1990 to 0.9 in 2019 (figure 2b). The ratio  
188 remained above 1 in the high-SDI region during this period. In 2019, the high- and  
189 high-middle-SDI regions had higher female death burdens, with ratios of female  
190 deaths to male deaths of 1.1 and 1.0, respectively, while the ratios in low- and low-  
191 middle-SDI regions were 0.8 and 0.8, which were the lowest (figure 2b left). Similar  
192 to the number of deaths, the CKD-related ASDR in males was higher than that in  
193 females over this period. In 2019, the female to male ASDR ratios ranged from 0.6 to  
194 0.8 in all the SDI regions (figure 2b right), suggesting that the CKD-related death  
195 burden was unbalanced between sexes and age groups.

196 At the regional level, the female to male deaths ratios in Eastern Europe was the  
197 highest (1.3), and that in Oceania was the lowest (0.7) in 2019. Death cases of both  
198 sexes were mainly concentrated in Asia. Both male and female deaths in Latin  
199 America had the fastest increase over time. In contrast, female death numbers in

1  
2  
3 200 Eastern Europe and male death numbers in Central Europe had the slowest increases  
4 201 (figure 2c, supplementary table 5). Unlike the number of deaths, the female to male  
5 202 ASDR ratios in most regions were less than 1.0, except in North Africa and Middle  
6 203 East (1.0). The ratio in Southern sub-Saharan Africa was the lowest, at 0.6  
7 204 (supplementary table 5).

8  
9 205 At the country level, the numbers of male deaths in almost all the countries showed  
10 206 increasing trends, except in Slovakia and Poland. The death ratios in Estonia,  
11 207 Hungary, Latvia, Austria and Vietnam were over 1.5, which suggested that the CKD-  
12 208 related death burden was much higher in women than in men in these countries. In  
13 209 contrast, the ratio was less than 0.5 in Papua New Guinea and the United Arab  
14 210 Emirates, indicating a higher death burden in men (figure 2d, supplementary table 6).  
15 211 The ASDRs in both females and males in Mongolia showed the largest decreases,  
16 212 with decreases of 43.2% in females and 57.1% in males.

### 213 **3. The age-related CKD-related death burden is more serious in high-SDI** 214 **regions**

215 In 2019, global CKD-related deaths were mainly distributed in middle-aged and  
216 elderly people over 50 years old, specifically 50-74 years old, who accounted for  
217 41.9% (figure 3a). Those aged 50-74 years had the largest death numbers in all the  
218 SDI regions except high-SDI region. In high-SDI region, the numbers of CKD-related  
219 death were increased with age, with the largest in 85 plus age group. The numbers of  
220 deaths in the 85 plus age group had the greatest increases in all SDI regions (figure  
221 3a). Those aged 0-9 years showed decreases in the numbers of deaths in all the SDI  
222 regions except the low-SDI region. Those aged 10-24 years had increased numbers of  
223 deaths in the low- and low-middle-SDI regions (figure 3b). Therefore, premature  
224 deaths were mainly concentrated in the relatively lower SDI regions in 2019.

225 During this period, the age distribution of CKD-related deaths in the relatively young  
226 population, including the 0-9, 10-24 and 25-49, and 50-74 age groups, showed a  
227 declining trend (figure 3c). In contrast, deaths in elderly individuals, particularly those  
228 aged 85 years and older, showed an upward trend. Central Asia was the only region  
229 that saw a decline composition of 85 plus age group (figure 3c). As to SDI level, the  
230 proportion of deaths the 85 plus age group showed an upward trend with increasing  
231 SDI level, with the highest value of 58.2% in the Western Europe region in 2019.

232 Eastern sub-Saharan Africa and Western sub-Saharan Africa, with lower SDI levels,  
233 had the highest proportions of the 10-24 and 0-9 age groups, respectively. The High-  
234 income Asia Pacific region had the largest increase in the proportion among the 85  
235 plus age group and the largest decrease among the 50-74 age group (figure 3c). These  
236 results revealed that the CKD-related death burden gradually shifted to elderly  
237 individuals in higher SDI regions. In addition, the proportion of females increased  
238 with increasing age was found in the further analysis of sex compositions among  
239 different age groups (figure 3d).

### 240 **4. CKD Burden attributable to risk factors**

241 Globally, metabolic disorders (such as diabetes, obesity and hypertension) were the

1  
2  
3 242 main risk factors for death from CKD. Over this period, the numbers of deaths due to  
4 243 CKD attributable to high systolic blood pressure (SBP), high fasting plasma glucose  
5 244 (FPG) and high body mass index (BMI) sharply increased (figure 4a), which were the  
6 245 main risk factors contributing to the ASDR of CKD, accounting for 62.0%, 33.6%  
7 246 and 27.2%, respectively in 2019. Even though the ASDR of CKD attributable to high  
8 247 BMI had the largest increase, at 77.1%, compared with 17.6% for high SBP and  
9 248 20.4% for high FPG, the ranks of these risk factors did not change (figure 4a).  
10 249 CKD attributable to high SBP was associated with the highest ASDRs in all the SDI  
11 250 regions over this period (figure 4a). In 2019, high SBP-attributed death rate in the  
12 251 low-SDI region was the higher than in other SDI-regions (figure 4b), even though it  
13 252 showed the greatest reduction during the 30-year study period (decrease of 3.0%). The  
14 253 high SBP-attributed death rate in the high-SDI region saw the fastest increase (figure  
15 254 4b). In 2019, ASDR attribute to high SBP in the high-middle-SDI region was the  
16 255 lowest. At the regional level, the rank of the high SBP-attributed ASDR in Central  
17 256 Latin America increased from sixth in 1990 to first among all 21 regions in 2019, with  
18 257 the greatest increase.  
19 258 The highest FPG-attributed ASDRs were mainly concentrated in the low-middle and  
20 259 low-SDI regions during this period (figure 4b). In 2019, high FPG was the second  
21 260 most prevalent risk factor, followed by high BMI, in all regions except the high-SDI  
22 261 region (figure 4a, c). In contrast, BMI was ranked as the second most prevalent  
23 262 contributor, exceeding FPG, to the ASDR in the high-SDI region in 2019, even  
24 263 though the FPG-attributed death rate in this region showed a larger increase than  
25 264 those in other regions (figure 4b, c). In 2019, the FPG-attributed ASDR in the middle-  
26 265 SDI region was higher than those in the other SDI regions, while that in the high-  
27 266 middle-SDI region was the lowest (figure 4b). The BMI-attributed ASDR in the  
28 267 middle-SDI was the highest, while in the high-middle SDI, it was the lowest. It is  
29 268 worth noting that the BMI-attributed ASDRs in all five SDI regions had steep  
30 269 increasing trends over this period (figure 4b). A diet high in sodium was the fourth-  
31 270 ranked contributor to the CKD ASDR in the high-middle-, middle- and low-middle-  
32 271 SDI regions and the fifth-ranked contributor in the high- and low-SDI regions (figure  
33 272 4a).  
34 273 Notably, although the high temperature-related death burden was low (figure 4c), the  
35 274 high temperature-attributed ASDRs increased steeply in the low-middle- and low-SDI  
36 275 regions over this period (figure 4b). These regions had the highest high temperature-  
37 276 attributed ASDRs in 2019 (figure 4c). In sharp contrast, the high temperature-  
38 277 attributed ASDRs in the high-middle- and high-SDI regions decreased by 7.6 and 6.6  
39 278 times, respectively, compared with those in 1990 (figure 4b). The high-middle-SDI  
40 279 region had the lowest high temperature-related death rate in 2019. At the regional  
41 280 level, East Asia, High-income North America, South Asia and Western Europe  
42 281 showed the fastest increases in the high temperature-attributed ASDRs, and South  
43 282 Asia had the highest high temperature-attributed death rate in 2019. Central Latin  
44 283 America and Southeast Asia had the fastest decreases in the high temperature-



1  
2  
3 284 attributed ASDR. Tropical Latin America, Southern sub-Saharan Africa and Eastern  
4 285 sub-Saharan Africa had the lowest values. In addition, the risk factors of low  
5 286 temperature and lead exposure were much larger than those of high temperature, and  
6 287 low temperature exposure was the first of the three in high- and high-middle-SDI  
7 288 regions (figure 4a).  
8  
9

10 289

## 11 290 **DISCUSSION**

12  
13 291 Despite advancements in scientific research that have led to a better understanding of  
14 292 the pathogenesis of diseases and significant improvements in disease management, no  
15 293 significant improvement was observed in the burden of CKD-related deaths, in  
16 294 contrast with other noncommunicable diseases. CKD is characterized by a gradual  
17 295 decline kidney function that eventually results in end-stage renal disease (ESRD),  
18 296 with little chance of reversal. CKD is therefore an important cause of morbidity and  
19 297 mortality among noncommunicable diseases.[17]

20 298 Our results showed significant regional variations in the CKD-related death burdens.  
21 299 The ASDR of CKD was associated with SDI, with higher CKD ASDRs in lower SDI  
22 300 regions. This may be related to a lack of effective health interventions caused by  
23 301 inadequate health care funding and weak health systems in lower SDI regions.[18] If  
24 302 these trends continue, differences in the CKD death burden among regions will  
25 303 increase further. In terms of geographical regions and countries, the CKD death  
26 304 burden in Mesoamerica (especially Nicaragua, El Salvador and Mexico) was more  
27 305 serious than those in other geographical locations. This may be due to the  
28 306 megathermal climate or the rates of diabetes and hypertension, which are major risk  
29 307 factors globally.[19] A recent study revealed that agricultural workers who currently  
30 308 or used to work in the sugarcane industry may be at high-risk of CKD.[19, 20] In  
31 309 addition, climate change in this region may be a risk factor for CKD-related  
32 310 death.[21] These findings call for increased government planning and interventions  
33 311 and the development of new and more appropriate solutions to address the CKD death  
34 312 burden in this area.

35 313 Globally, the number of CKD-related deaths and ASDR were larger and higher in  
36 314 males than in females, but the difference narrowed over time.[2] It is worth noting  
37 315 that the sex ratio of deaths in the high-SDI region remained above 1 during the study  
38 316 period, but the ASDR ratio did not, which may be attributed to the increase in the  
39 317 population and the aging of the population in this region, especially among females.  
40 318 In contrast, the sex ratio of the ASDR was higher than the ratio of deaths in several  
41 319 countries in the Middle East, such as Egypt (1.60 vs. 1.13 in Egypt). This result  
42 320 coincided with the lower disability-free life expectancy among women's total lifetime  
43 321 in this region.[22]

44 322 Over the past 30 years, the age distribution of CKD-related deaths showed a gradual  
45 323 increasing trend with age, and people in the middle-aged and elderly groups (> 50  
46 324 years old) accounted for the main proportion of CKD deaths. This trend may be  
47 325 closely related to improvements in health care as well as population aging worldwide.  
48  
49  
50  
51  
52  
53  
54  
55  
56  
57  
58  
59

1  
2  
3 326 However, in regions with relatively low SDIs, such as Africa, premature deaths are  
4 327 still prevalent, with increasing numbers, which may be explained by the low levels of  
5 328 medical and health care in these regions. Patients diagnosed with CKD may not  
6 329 receive timely and adequate medical care to slow the progression of renal  
7 330 deterioration, resulting in premature death, which reflects the impact of  
8 331 socioeconomic development on premature CKD-related deaths.[23] Therefore, policy  
9 332 makers and the health care sector in these regions should implement urgent measures  
10 333 to reverse this negative trend.

11 334 The most cost-effective strategy to reduce the number of CKD-related deaths is  
12 335 preventing the onset of CKD.[24] Therefore, screening high-risk groups and  
13 336 developing interventions targeting a variety of risk factors are the most effective  
14 337 approaches.[24, 25] High SBP, FPG and BMI were the main risk factors for CKD-  
15 338 related death.[1, 7, 26] Hence, implementing measures to improve blood pressure,  
16 339 plasma glucose and body weight is critical for reducing the CKD burden.[27]  
17 340 Although the CKD-related death burden attributed to high temperature exposure was  
18 341 low, the rapid upward trend, especially in the low- and low-middle-SDI regions,  
19 342 should be noted. In contrast, this burden in the high- and high-middle-SDI regions  
20 343 tended to remain stable or even decreased. Some studies recently reported large  
21 344 numbers of young sugarcane workers with end-stage of CKD, who did not have any  
22 345 known risk factors for CKD, such as high blood pressure or diabetes before.[19]  
23 346 Subsequent reports found that CKD of unknown origin also occurred in people who  
24 347 worked in agriculture or construction in other low-socioeconomic areas.[28] It has  
25 348 already been the leading cause of hospitalization and death among CKD patients in  
26 349 Central America.[29] Even though the exact pathogenesis of CKD in these individuals  
27 350 is currently unknown, it is undoubtedly related to heat exposure and dehydration  
28 351 caused by rapidly changing environmental conditions.[28, 30, 31] Compared with the  
29 352 higher SDI regions, the ability to provide health care and adapt to climate change in  
30 353 relative lower regions were limited; therefore, the situation is severely affected by  
31 354 high temperature exposure and is getting worse.[31] Local governments should  
32 355 formulate effective measures to cope with the high-temperature environment and  
33 356 formulate strategies to mitigate climate change. Moreover, cooperation among  
34 357 clinicians, public health personnel, government agencies and medical researchers  
35 358 should be promoted to raise public awareness of CKD, actively explore the specific  
36 359 mechanism of the influence of high temperature exposure on CKD and minimize the  
37 360 adverse effects of climate change on kidney health.

38 361 Additionally, it has been shown that the association between cold exposure promoting  
39 362 CKD-related hospital visits is stronger than at moderate and high temperatures.[32]  
40 363 And acute cold exposure can lead to a significant increase in arterial blood pressure in  
41 364 patients with or without comorbid CKD.[33] Therefore, avoiding acute cold exposure  
42 365 and enhancing warmth measures in cold exposure are particularly important.  
43 366 Environmental lead exposure increases the risk of CKD.[34, 35] Due to the  
44 367 prevalence of lead in the environment, human exposure to this metal is almost

368 inevitable. Therefore, public measures to reduce environmental contamination and  
369 reduce the food chain transfer of lead are essential, as are measures to reduce risk by  
370 setting maximum allowable concentrations of lead in staple foods at the lowest  
371 achievable levels.

### 372 **Limitations**

373 The GBD database provides extensive data and estimates of risk factors for the global  
374 burden of CKD, but there are some limitations, which have been detailed in many  
375 previously published studies.[13] First, more detailed information about the included  
376 countries and regions could not be obtained from the GBD database. In some  
377 countries with large territory spans or with multinational populations, the impact of  
378 regional and ethnic differences within countries on the global burden of CKD could  
379 not be further analyzed. In addition, the CKD burden may be underestimated in less  
380 developed countries and areas due to limited access to health care. Moreover, data on  
381 the impact of metabolic factors other than blood pressure and blood glucose, such as  
382 triglycerides, cholesterol or uric acid, on the global burden of CKD are lacking.

### 383 **CONCLUSIONS**

384 In summary, CKD remains a critical global public health concern. CKD-related  
385 deaths continue to increase, with the majority now occurring in elderly adults, mainly  
386 due to the increase in and the aging of the global population. However, the numbers  
387 of premature deaths in regions with low-SDI levels remain high, and the trend is  
388 increasing. In addition, the burden of CKD-related deaths is more severe in men than  
389 in women, though this difference is likely to narrow over time. Hypertension, diabetes  
390 and obesity remain critical risk factors for CKD. Moreover, in the low-SDI region, the  
391 rapidly increasing number of CKD-related deaths attributed to high temperature  
392 exposure should not be ignored, and national-level measures should be taken to  
393 reverse this trend.

### 394 **Acknowledgments**

395 Authors appreciate all the collaborators involved in the GBD study 2019.

### 396 **Competing interests**

397 No competing interests to declare.

### 398 **Contributors**

399 The idea and conceptual design: YL and XS; Data acquisition: ZC and NH; Literature  
400 retrieval and data collation: XL and XF; Data analysis: ZC and JL; Visualization: XL  
401 and YL; Preparation of the original draft: ZC and NH; Manuscript editing and  
402 revising: YL, XF and XS. Authors confirm that all of them have full access to all the  
403 data of the present study and are responsible for submitting for publication.

### 404 **Funding**

405 This work was supported by the National Natural Science Foundation of China (Grant  
406 No. 82000755) and the Nature Science Foundation of Shandong Province (Grant No.  
407 ZR2020QH086).

### 408 **Ethics approval**

409 Not applicable. Data of this study was publicly available and no patient and animal



1  
2  
3 410 was involved.

4 411 **Data sharing statement**

5  
6 412 Data are available in a public, open access repository. Data used from the online

7 413 database the Global Health Data Exchange (GHDx) query tool

8  
9 414 (<http://ghdx.healthdata.org/gbd-results-tool>).[11]

10 415  
11  
12  
13  
14  
15  
16  
17  
18  
19  
20  
21  
22  
23  
24  
25  
26  
27  
28  
29  
30  
31  
32  
33  
34  
35  
36  
37  
38  
39  
40  
41  
42  
43  
44  
45  
46  
47  
48  
49  
50  
51  
52  
53  
54  
55  
56  
57  
58  
59  
60

For peer review only

416 **REFERENCES**

- 417 1 Collaboration GCKD. Global, regional, and national burden of chronic  
418 kidney disease, 1990–2017: a systematic analysis for the Global  
419 Burden of Disease Study 2017. *Lancet* 2020;395:709–33. doi:  
420 10.1016/s0140-6736(20)30045-3
- 421 2 Hockham C, Schanschieff F, Woodward M. Sex Differences in CKD-  
422 Associated Mortality From 1990 to 2019: Data From the Global Burden  
423 of Disease Study. *Kidney Medicine* 2022;4doi:  
424 10.1016/j.xkme.2022.100535
- 425 3 Levey AS, Atkins R, Coresh J, et al. Chronic kidney disease as a  
426 global public health problem: approaches and initiatives - a position  
427 statement from Kidney Disease Improving Global Outcomes. *Kidney Int*  
428 2007;72:247–59. doi: 10.1038/sj.ki.5002343
- 429 4 Dai H, Alsalhe TA, Chalghaf N, et al. The global burden of disease  
430 attributable to high body mass index in 195 countries and territories,  
431 1990–2017: An analysis of the Global Burden of Disease Study.  
432 2020;17:e1003198. doi: 10.1371/journal.pmed.1003198
- 433 5 Kovács N, Nagy A, Dombrádi V, et al. Inequalities in the Global  
434 Burden of Chronic Kidney Disease Due to Type 2 Diabetes Mellitus:  
435 An Analysis of Trends from 1990 to 2019. 2021;18doi:  
436 10.3390/ijerph18094723
- 437 6 Campbell JR, Johnston JC, Ronald LA, et al. Screening for Latent  
438 Tuberculosis Infection in Migrants With CKD: A Cost-effectiveness  
439 Analysis. *Am J Kidney Dis* 2019;73:39–50. doi:  
440 10.1053/j.ajkd.2018.07.014
- 441 7 Chen A, Zou M, Young CA, et al. Disease Burden of Chronic Kidney  
442 Disease Due to Hypertension From 1990 to 2019: A Global Analysis.  
443 *Front Med (Lausanne)* 2021;8:690487. doi: 10.3389/fmed.2021.690487
- 444 8 Xie Y, Bowe B, Mokdad AH, et al. Analysis of the Global Burden of  
445 Disease study highlights the global, regional, and national  
446 trends of chronic kidney disease epidemiology from 1990 to 2016.  
447 *Kidney Int* 2018;94:567–81. doi: 10.1016/j.kint.2018.04.011
- 448 9 Norhammar A, Bodegard J, Eriksson JW, et al. Cost of healthcare  
449 utilization associated with incident cardiovascular and renal  
450 disease in individuals with type 2 diabetes: a multinational,  
451 observational study across 12 countries. 2022doi: 10.1111/dom.14698
- 452 10 Garofalo C, Borrelli S, Provenzano M, et al. Dietary Salt  
453 Restriction in Chronic Kidney Disease: A Meta-Analysis of  
454 Randomized Clinical Trials. 2018;10doi: 10.3390/nu10060732
- 455 11 Collaboration GCKD. Data from the online database the Global Health  
456 Data Exchange (GHDx) query tool. Global Health Data Exchange

- 1  
2  
3 457 [dataset]. December 31, 2019. [http://ghdx.healthdata.org/gbd-](http://ghdx.healthdata.org/gbd-results-tool)  
4 458 [results-tool](http://ghdx.healthdata.org/gbd-results-tool).  
5  
6 459 12 Global burden of 369 diseases and injuries in 204 countries and  
7 460 territories, 1990–2019: a systematic analysis for the Global Burden  
8 461 of Disease Study 2019. *Lancet* 2020;396:1204–22. doi: 10.1016/s0140-  
9 462 6736(20)30925–9  
10  
11 463 13 Global burden of 87 risk factors in 204 countries and territories,  
12 464 1990–2019: a systematic analysis for the Global Burden of Disease  
13 465 Study 2019. *Lancet* 2020;396:1223–49. doi: 10.1016/s0140-  
14 466 6736(20)30752–2  
15  
16 467 14 Global age-sex-specific fertility, mortality, healthy life  
17 468 expectancy (HALE), and population estimates in 204 countries and  
18 469 territories, 1950–2019: a comprehensive demographic analysis for  
19 470 the Global Burden of Disease Study 2019. *Lancet* 2020;396:1160–203.  
20 471 doi: 10.1016/s0140-6736(20)30977–6  
21  
22 472 15 Liu Z, Jiang Y, Yuan H, et al. The trends in incidence of primary  
23 473 liver cancer caused by specific etiologies: Results from the Global  
24 474 Burden of Disease Study 2016 and implications for liver cancer  
25 475 prevention. *J Hepatol* 2019;70:674–83. doi:  
26 476 10.1016/j.jhep.2018.12.001  
27  
28 477 16 Wang W, Hu M, Liu H, et al. Global Burden of Disease Study 2019  
29 478 suggests that metabolic risk factors are the leading drivers of the  
30 479 burden of ischemic heart disease. *Cell Metab* 2021;33:1943–56. e2.  
31 480 doi: 10.1016/j.cmet.2021.08.005  
32  
33 481 17 Stanifer JW, Von Isenburg M, Chertow GM, et al. Chronic kidney  
34 482 disease care models in low- and middle-income countries: a  
35 483 systematic review. *BMJ Glob Health* 2018;3:e000728. doi:  
36 484 10.1136/bmjgh-2018-000728  
37  
38 485 18 Ameh OI, Ekrikpo UE, Kengne AP. Preventing CKD in Low- and Middle-  
39 486 Income Countries: A Call for Urgent Action. *Kidney Int Rep*  
40 487 2020;5:255–62. doi: 10.1016/j.ekir.2019.12.013  
41  
42 488 19 Ferguson R, Leatherman S, Fiore M, et al. Prevalence and Risk  
43 489 Factors for CKD in the General Population of Southwestern Nicaragua.  
44 490 *J Am Soc Nephrol* 2020;31:1585–93. doi: 10.1681/asn.2019050521  
45  
46 491 20 Hansson E, Mansourian A, Farnaghi M, et al. An ecological study of  
47 492 chronic kidney disease in five Mesoamerican countries: associations  
48 493 with crop and heat. *BMC Public Health* 2021;21:840. doi:  
49 494 10.1186/s12889-021-10822-9  
50  
51 495 21 Sasai F, Roncal-Jimenez C, Rogers K, et al. Climate Change and  
52 496 Nephrology. *Nephrol Dial Transplant* 2021doi: 10.1093/ndt/gfab258  
53  
54 497 22 Metwally S. Disability-free life expectancy at old ages in Egypt.  
55 498 *J Biosoc Sci* 2021;53:290–304. doi: 10.1017/s0021932020000218  
56  
57  
58  
59  
60

- 1  
2  
3 499 23 Bello AK, Levin A, Tonelli M, et al. Assessment of Global Kidney  
4 500 Health Care Status. *Jama* 2017;317:1864–81. doi:  
5 501 10.1001/jama.2017.4046  
6  
7 502 24 Komenda P, Ferguson TW, Macdonald K, et al. Cost-effectiveness of  
8 503 primary screening for CKD: a systematic review. *Am J Kidney Dis*  
9 504 2014;63:789–97. doi: 10.1053/j.ajkd.2013.12.012  
10  
11 505 25 Cardiovascular disease, chronic kidney disease, and diabetes  
12 506 mortality burden of cardiometabolic risk factors from 1980 to 2010:  
13 507 a comparative risk assessment. *Lancet Diabetes Endocrinol*  
14 508 2014;2:634–47. doi: 10.1016/s2213–8587(14)70102–0  
15  
16 509 26 Li H, Lu W, Wang A, et al. Changing epidemiology of chronic kidney  
17 510 disease as a result of type 2 diabetes mellitus from 1990 to 2017:  
18 511 Estimates from Global Burden of Disease 2017. *J Diabetes Investig*  
19 512 2021;12:346–56. doi: 10.1111/jdi.13355  
20  
21 513 27 Ene-Iordache B, Perico N, Bikbov B, et al. Chronic kidney disease  
22 514 and cardiovascular risk in six regions of the world (ISN-KDDC): a  
23 515 cross-sectional study. *Lancet Glob Health* 2016;4:e307–19. doi:  
24 516 10.1016/s2214–109x(16)00071–1  
25  
26 517 28 Johnson RJ, Wesseling C, Newman LS. Chronic Kidney Disease of  
27 518 Unknown Cause in Agricultural Communities. *N Engl J Med*  
28 519 2019;380:1843–52. doi: 10.1056/NEJMra1813869  
29  
30 520 29 Sorensen C, Garcia-Trabanino R. A New Era of Climate Medicine –  
31 521 Addressing Heat-Triggered Renal Disease. *N Engl J Med* 2019;381:693–  
32 522 96. doi: 10.1056/NEJMp1907859  
33  
34 523 30 Harries AD. Chronic kidney disease, tuberculosis and climate change.  
35 524 *Int J Tuberc Lung Dis* 2020;24:132–33. doi: 10.5588/ijtld.19.0556  
36  
37 525 31 Borg MA, Bi P. The impact of climate change on kidney health. *Nat*  
38 526 *Rev Nephrol* 2021;17:294–95. doi: 10.1038/s41581–020–00365–4  
39  
40 527 32 Wu J, Ye Q, Fang L, et al. Short-term association of NO<sub>2</sub> with  
41 528 hospital visits for chronic kidney disease and effect modification  
42 529 by temperature in Hefei, China: A time series study. *Ecotoxicol*  
43 530 *Environ Saf* 2022;237:113505. doi: 10.1016/j.ecoenv.2022.113505  
44  
45 531 33 Masajtis-Zagajewska A, Pawlowicz E, Nowicki M. Effect of Short-Term  
46 532 Cold Exposure on Central Aortic Blood Pressure in Patients with  
47 533 CKD. *Nephron* 2021;145:20–26. doi: 10.1159/000510365  
48  
49 534 34 Navas-Acien A, Tellez-Plaza M, Guallar E, et al. Blood cadmium and  
50 535 lead and chronic kidney disease in US adults: a joint analysis. *Am*  
51 536 *J Epidemiol* 2009;170:1156–64. doi: 10.1093/aje/kwp248  
52  
53 537 35 Ekong EB, Jaar BG, Weaver VM. Lead-related nephrotoxicity: a review  
54 538 of the epidemiologic evidence. *Kidney Int* 2006;70:2074–84. doi:  
55 539 10.1038/sj.ki.5001809  
56  
57 540  
58  
59  
60

1  
2  
3  
4  
5  
6  
7  
8  
9  
10  
11  
12  
13  
14  
15  
16  
17  
18  
19  
20  
21  
22  
23  
24  
25  
26  
27  
28  
29  
30  
31  
32  
33  
34  
35  
36  
37  
38  
39  
40  
41  
42  
43  
44  
45  
46  
47  
48  
49  
50  
51  
52  
53  
54  
55  
56  
57  
58  
59  
60

541

For peer review only

1  
2  
3 542 **Figure legends**  
4

5  
6 543 **figure 1.** Global death cases and death rate of CKD from 1990 to 2019. (A) Death  
7 544 cases in global and SDI areas in 1990 and 2019. (B) Death cases and ASDRs in global  
8 545 and SDI areas from 1990 to 2019. (C) Relationship between ASDRs and SDI from  
9 546 1990 to 2019. (D) Death cases and ASDRs in 21 geographic regions from 1990 to  
10 547 2019. (E) Death cases in 204 countries and territories in 2019. (F) The ASDRs in 204  
11 548 countries and territories in 1990 and 2019. (G) The EAPCs of ASDRs in 204  
12 549 countries and territories from 1990 to 2019. ASDR, age-standardized death rate (per  
13 550 100,000 population).  
14  
15  
16

17 551 **figure 2.** Sex differences and trends of CKD deaths and ASDR from 1990 to 2019.  
18 552 (A) The ASDRs in males and females globally from 1990 to 2019. (B) Death cases  
19 553 ratio between females to males (left) and ASDR ratio between females to males  
20 554 (right), in global and SDI areas in 1990 and 2019. (C) Gender composition of death  
21 555 cases and ASDR in global and SDI areas in 1990 and 2019. (D) Death cases ratio  
22 556 between females to males (left) and ASDR ratio between females to males (right) in  
23 557 204 countries and territories in 2019. ASDR, age-standardized death rate (per 100,000  
24 558 population).  
25  
26  
27  
28

29 559 **figure 3.** The distribution of CKD death cases and rates in age groups, SDI areas and  
30 560 21 geographic regions from 1990 to 2019. (A) Death cases in age groups in global and  
31 561 SDI areas from 1990 to 2019. (B) The change percentage of death cases (right) and  
32 562 rate (left) in age groups from 1990 to 2019. (C) Six age groups as percentages of total  
33 563 deaths in global, SDI areas and 21 geographic regions in 1990 and 2019. (D) Gender  
34 564 composition of death in global and SDI areas in 2019.  
35  
36  
37

38 565 **figure 4.** Predominant contribution of risk factors to CKD-related deaths in global and  
39 566 SDI areas. (A) Death cases and ASDRs attributed to main risk factors by SDI region  
40 567 from 1990 to 2019. (B) The ASDRs trends in SDI regions attributed to each main risk  
41 568 factor. (C) Proportions of deaths in global and SDI regions attributed to each risk  
42 569 factors in 2019. ASDR, age-standardized death rate (per 100,000 population).  
43  
44  
45

46 570  
47  
48  
49  
50  
51  
52  
53  
54  
55  
56  
57  
58  
59  
60



1  
2  
3  
4  
5  
6  
7  
8  
9  
10  
11  
12  
13  
14  
15  
16  
17  
18  
19  
20  
21  
22  
23  
24  
25  
26  
27  
28  
29  
30  
31  
32  
33  
34  
35  
36  
37  
38  
39  
40  
41  
42  
43  
44  
45  
46  
47  
48  
49  
50  
51  
52  
53  
54  
55  
56  
57  
58  
59  
60

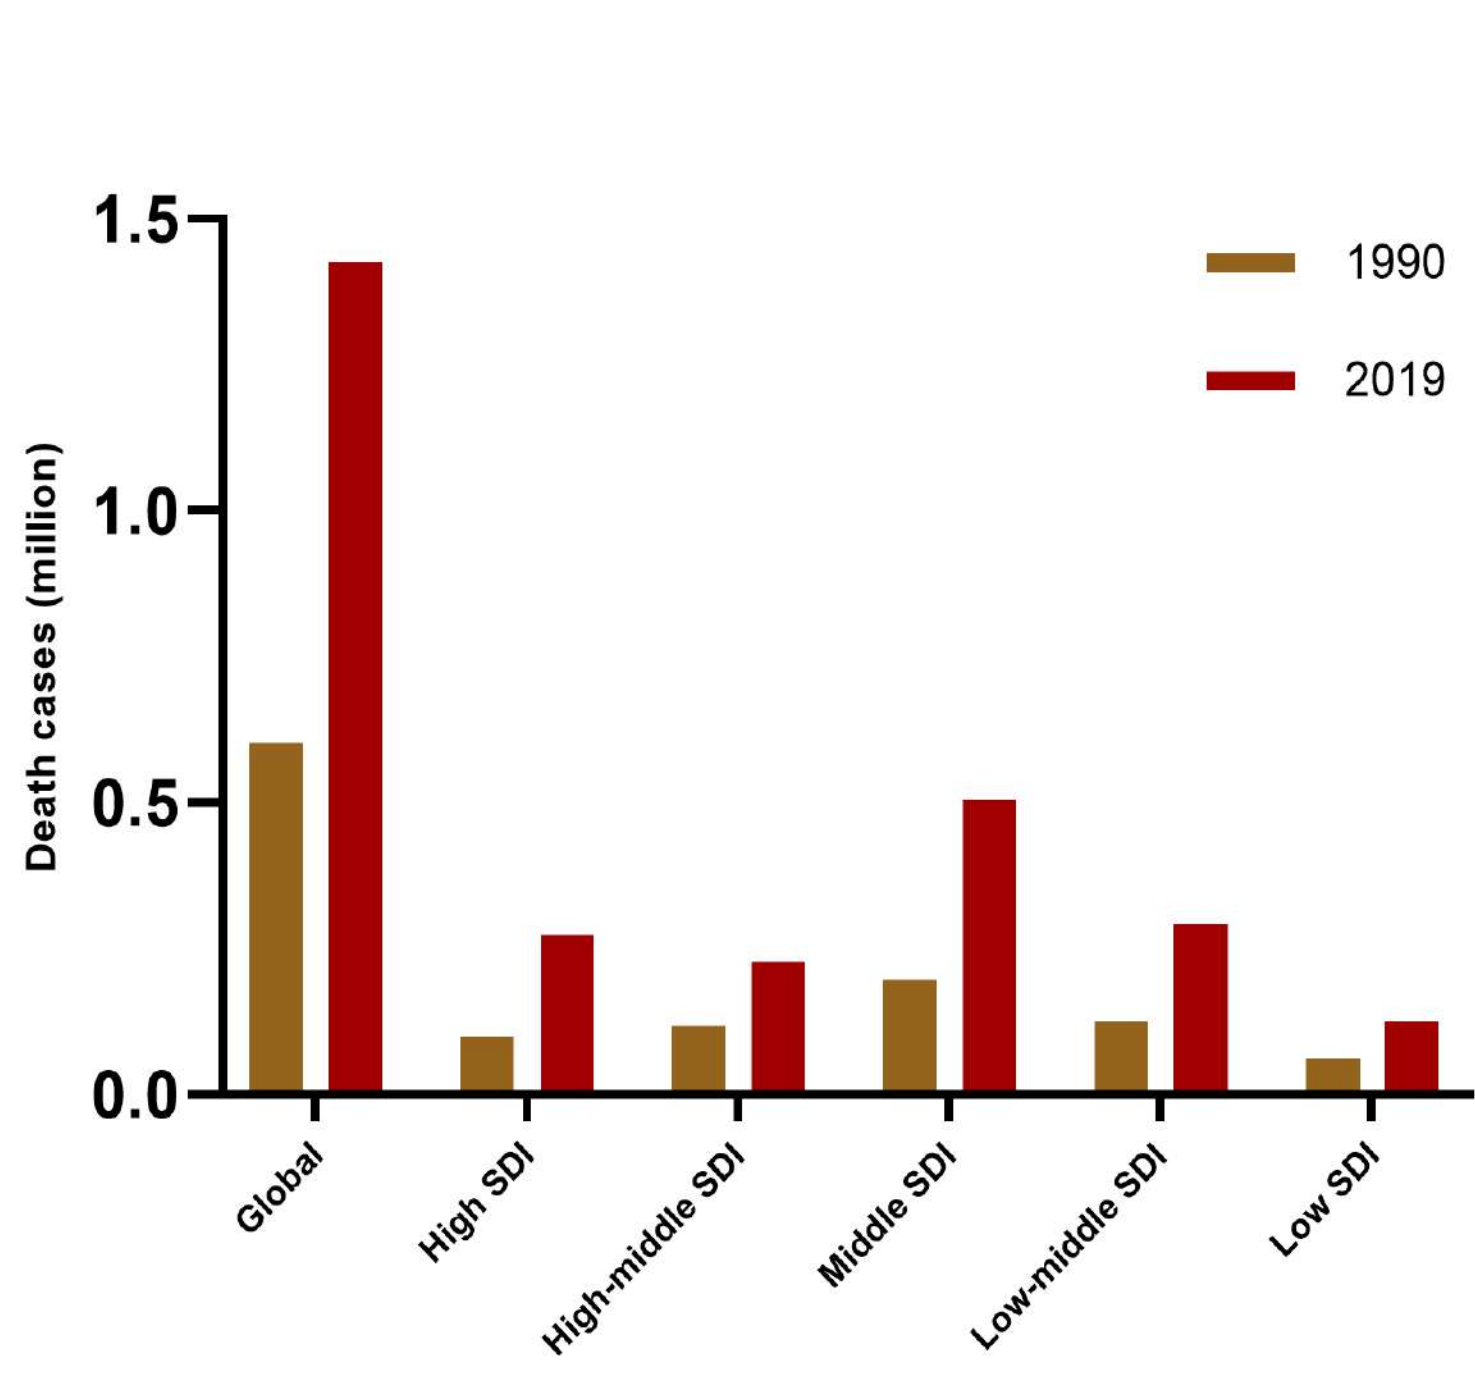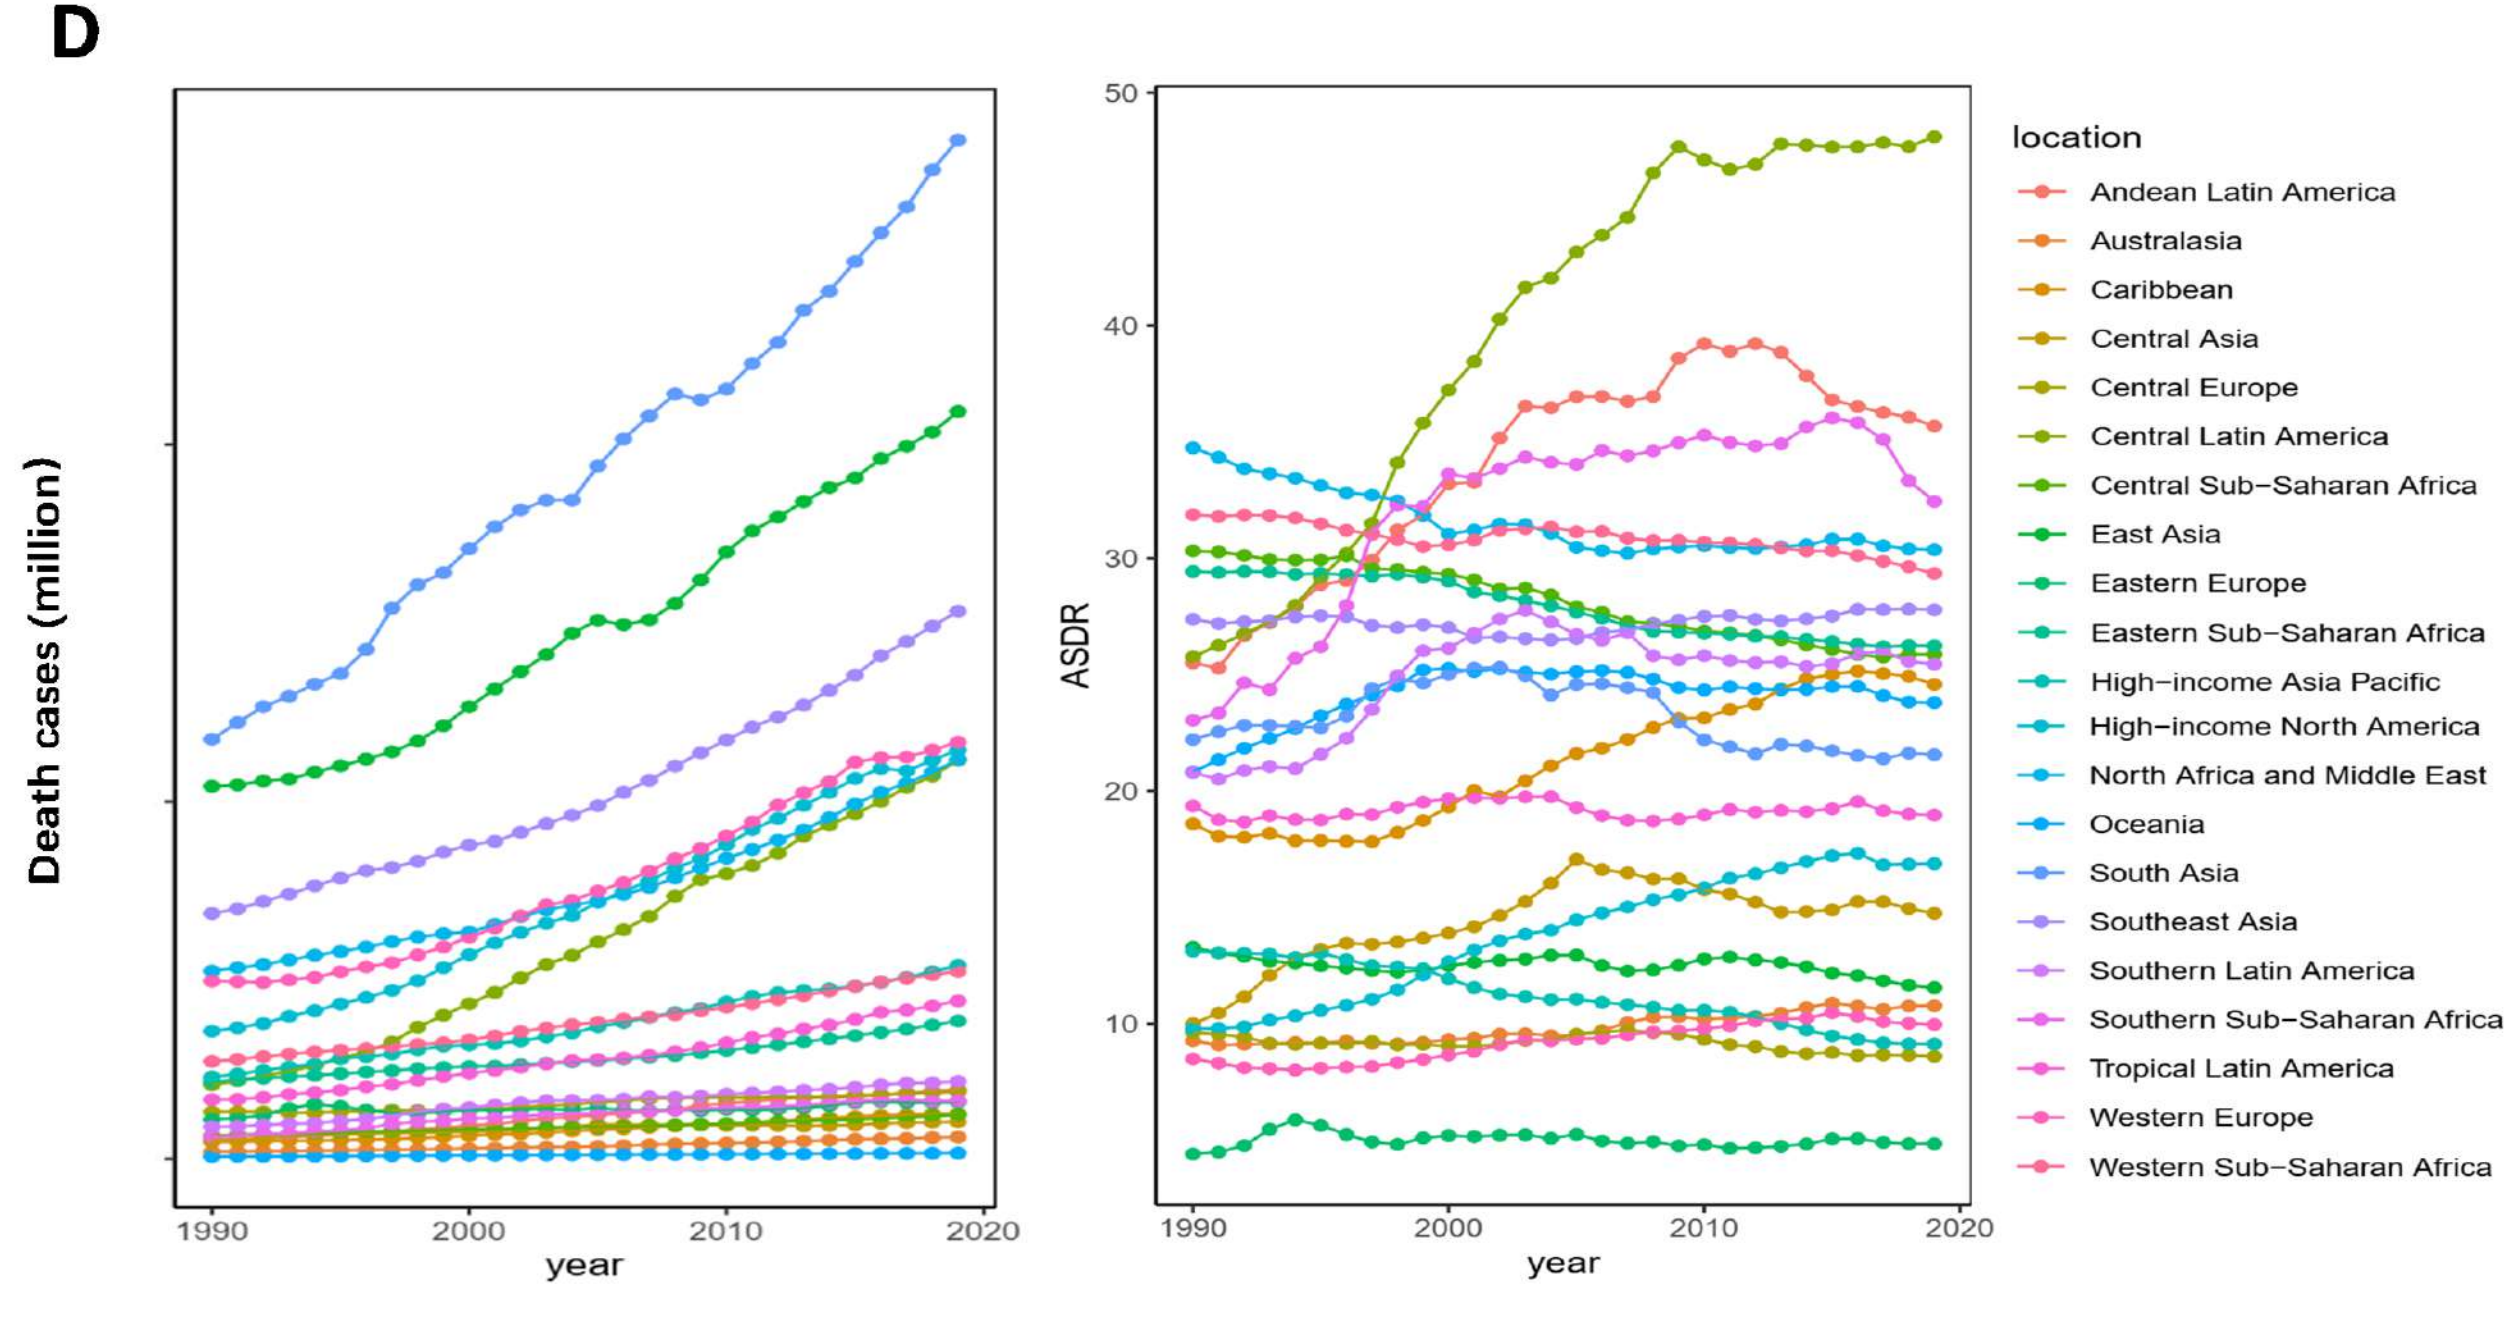

**B**

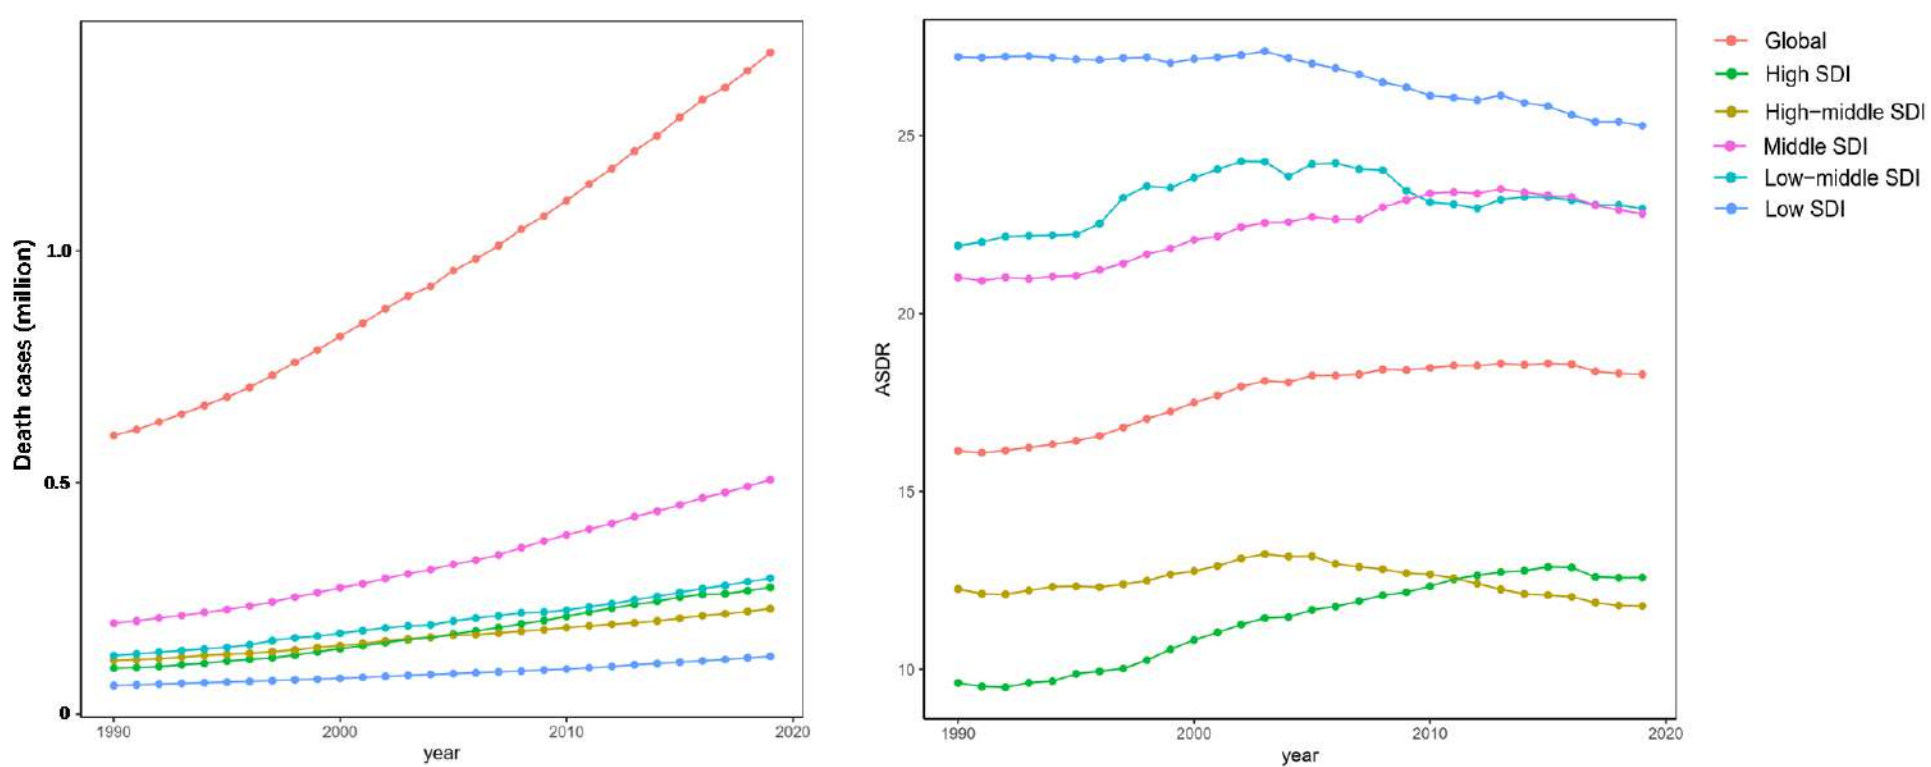

**C**

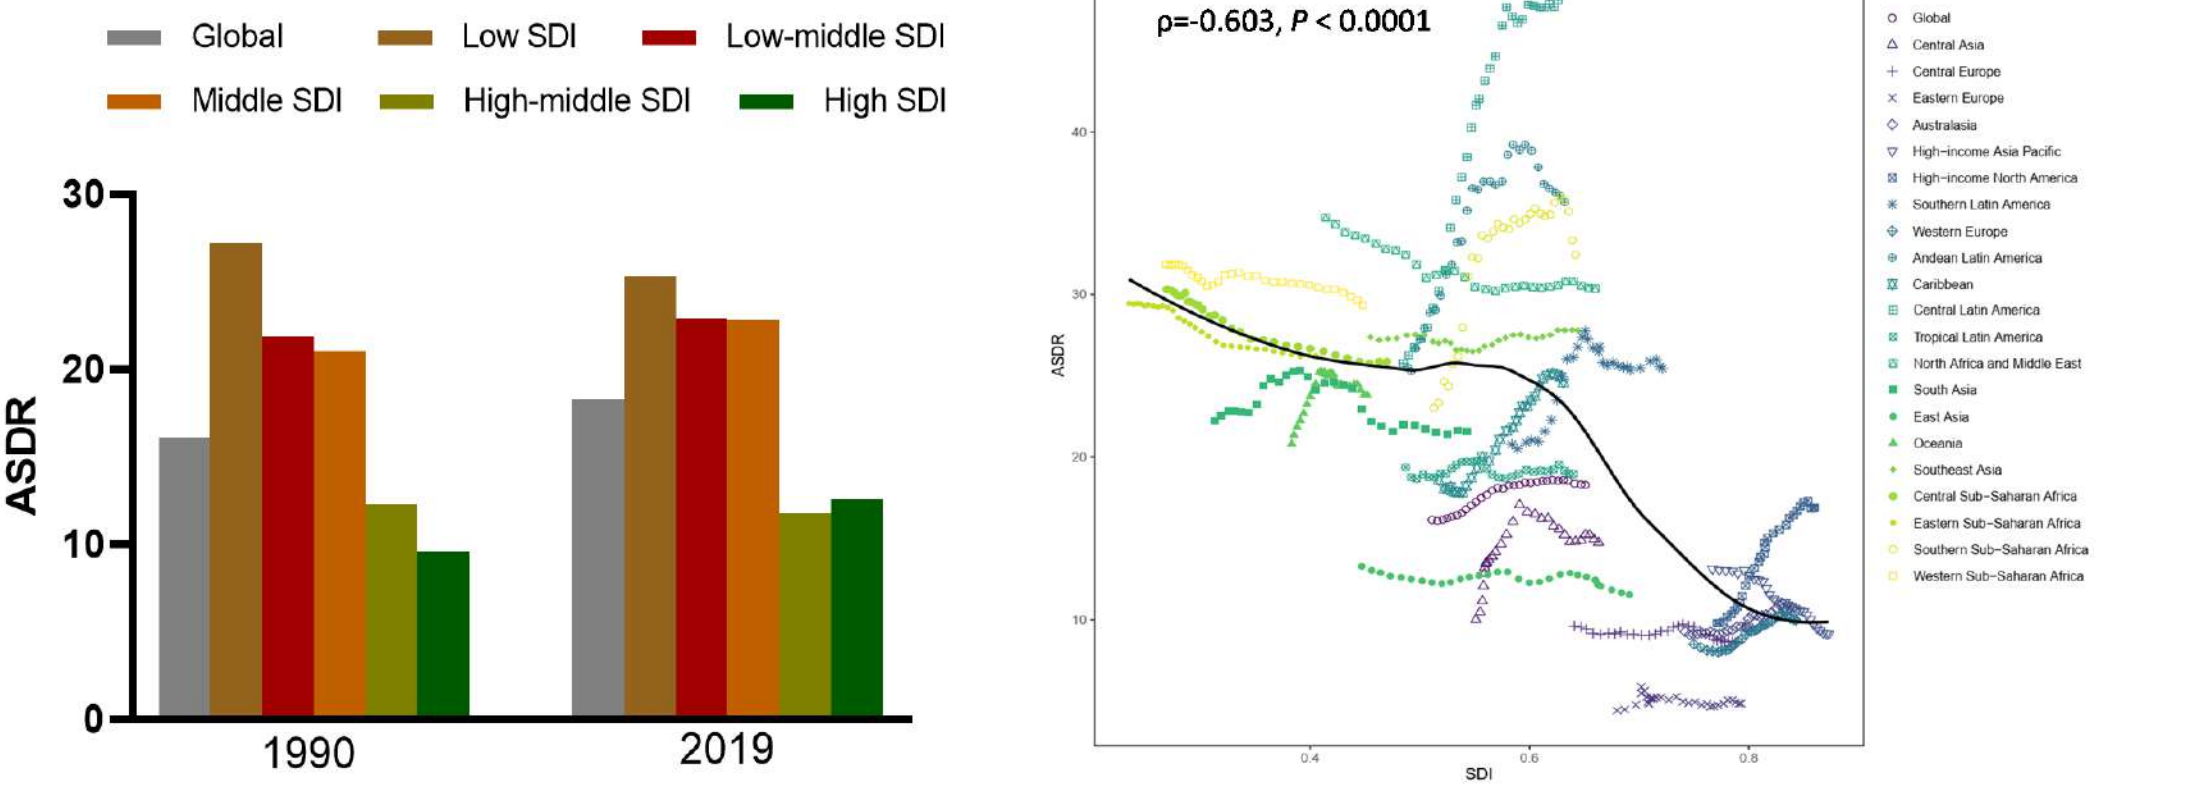

**E**

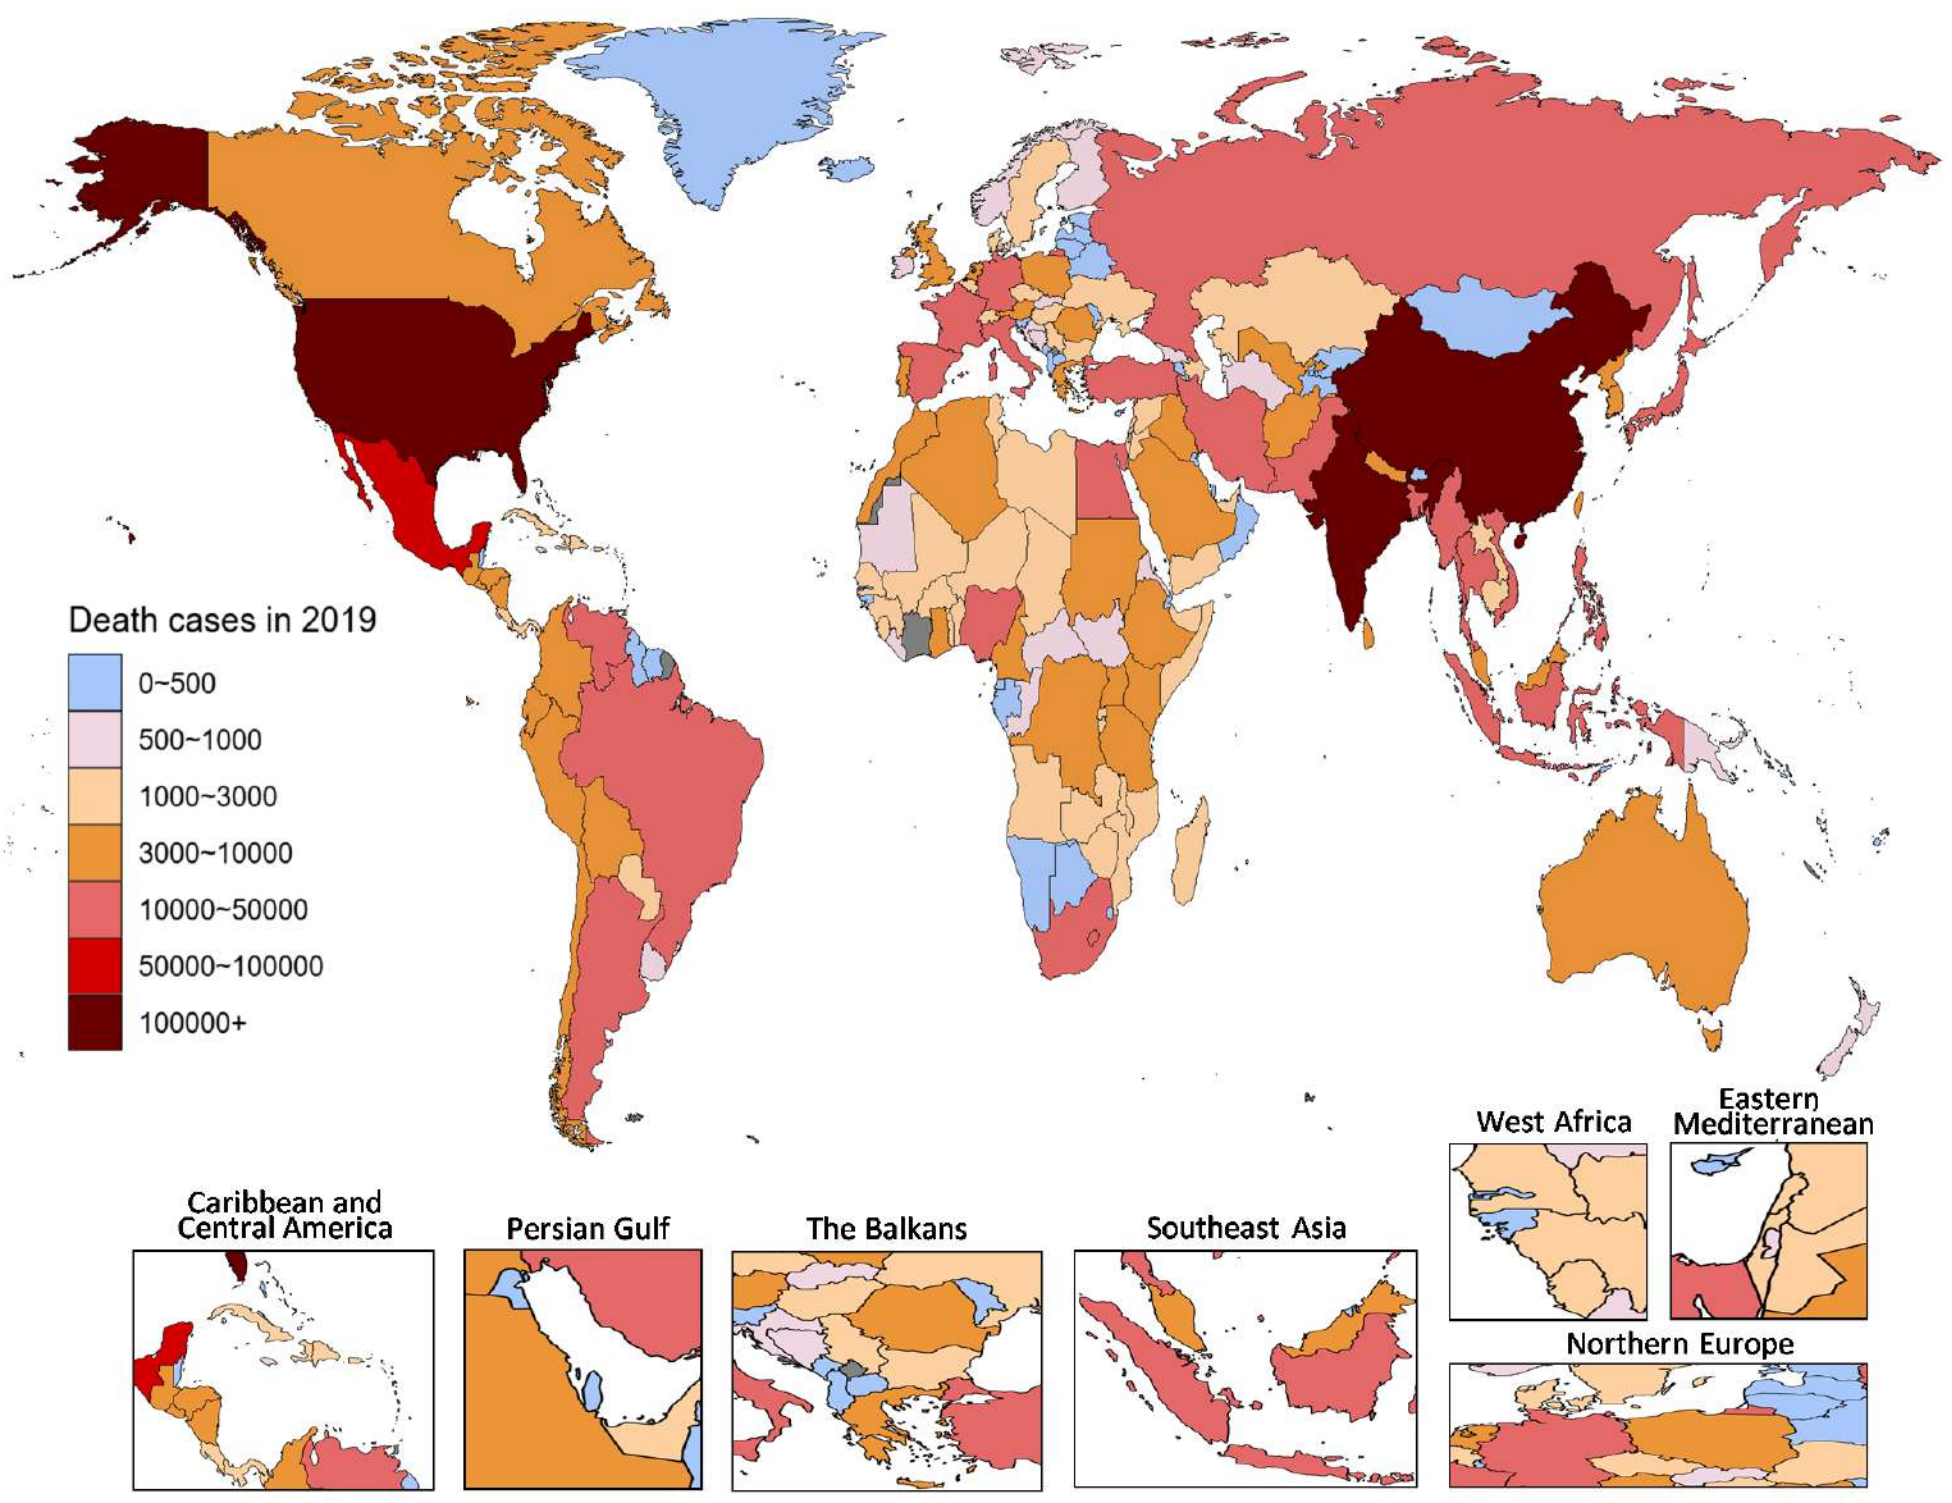

**G**

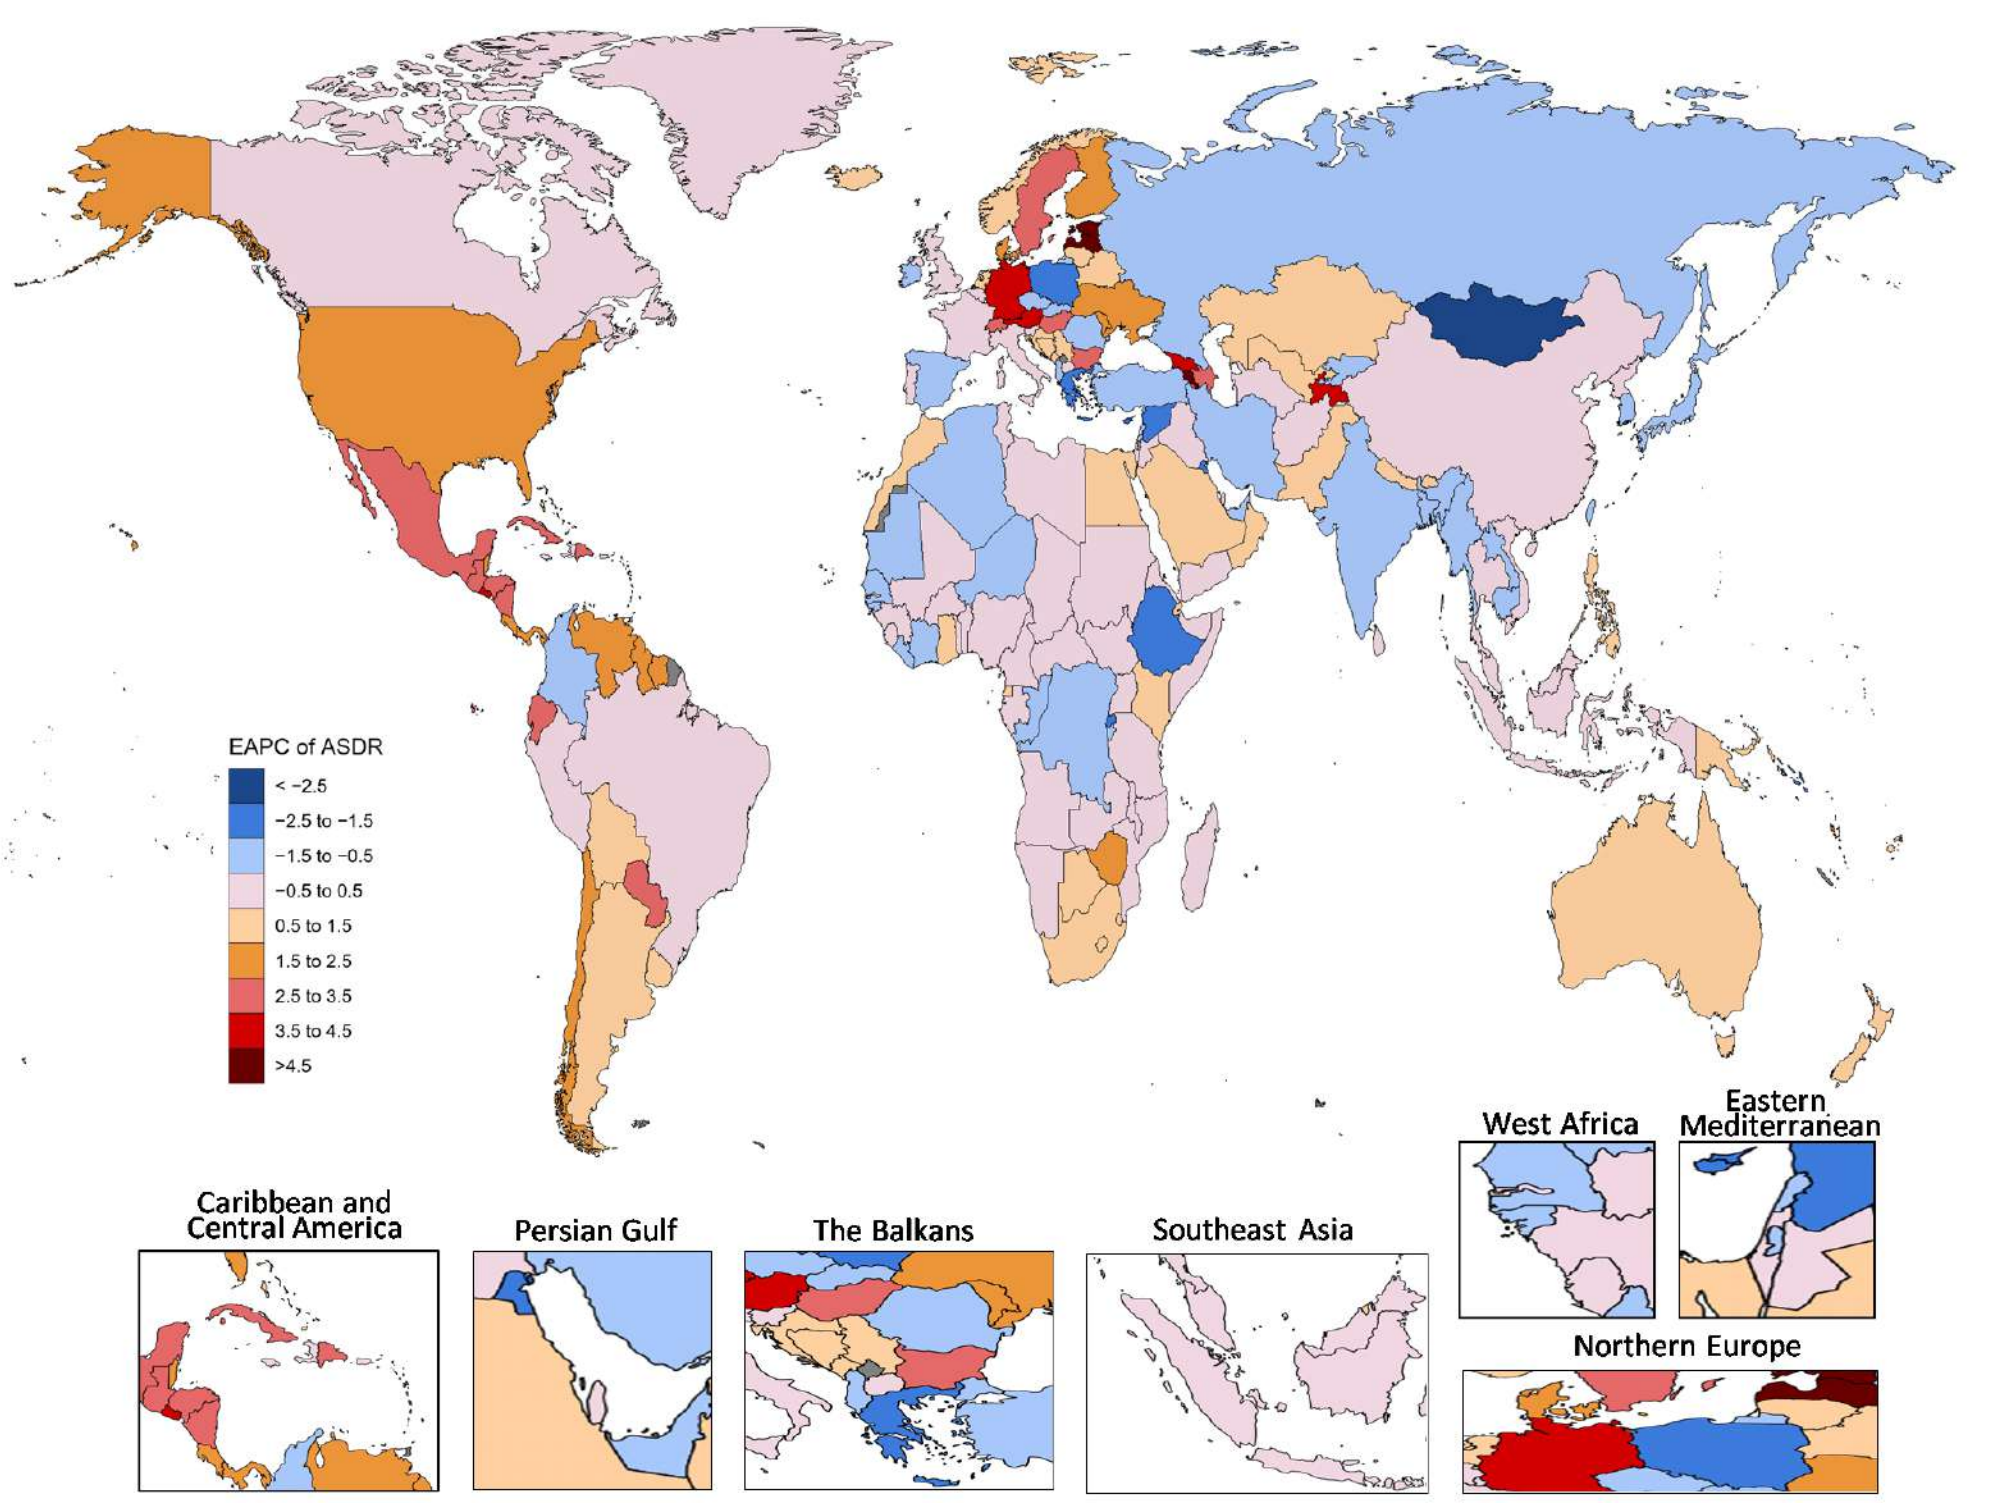

**F**

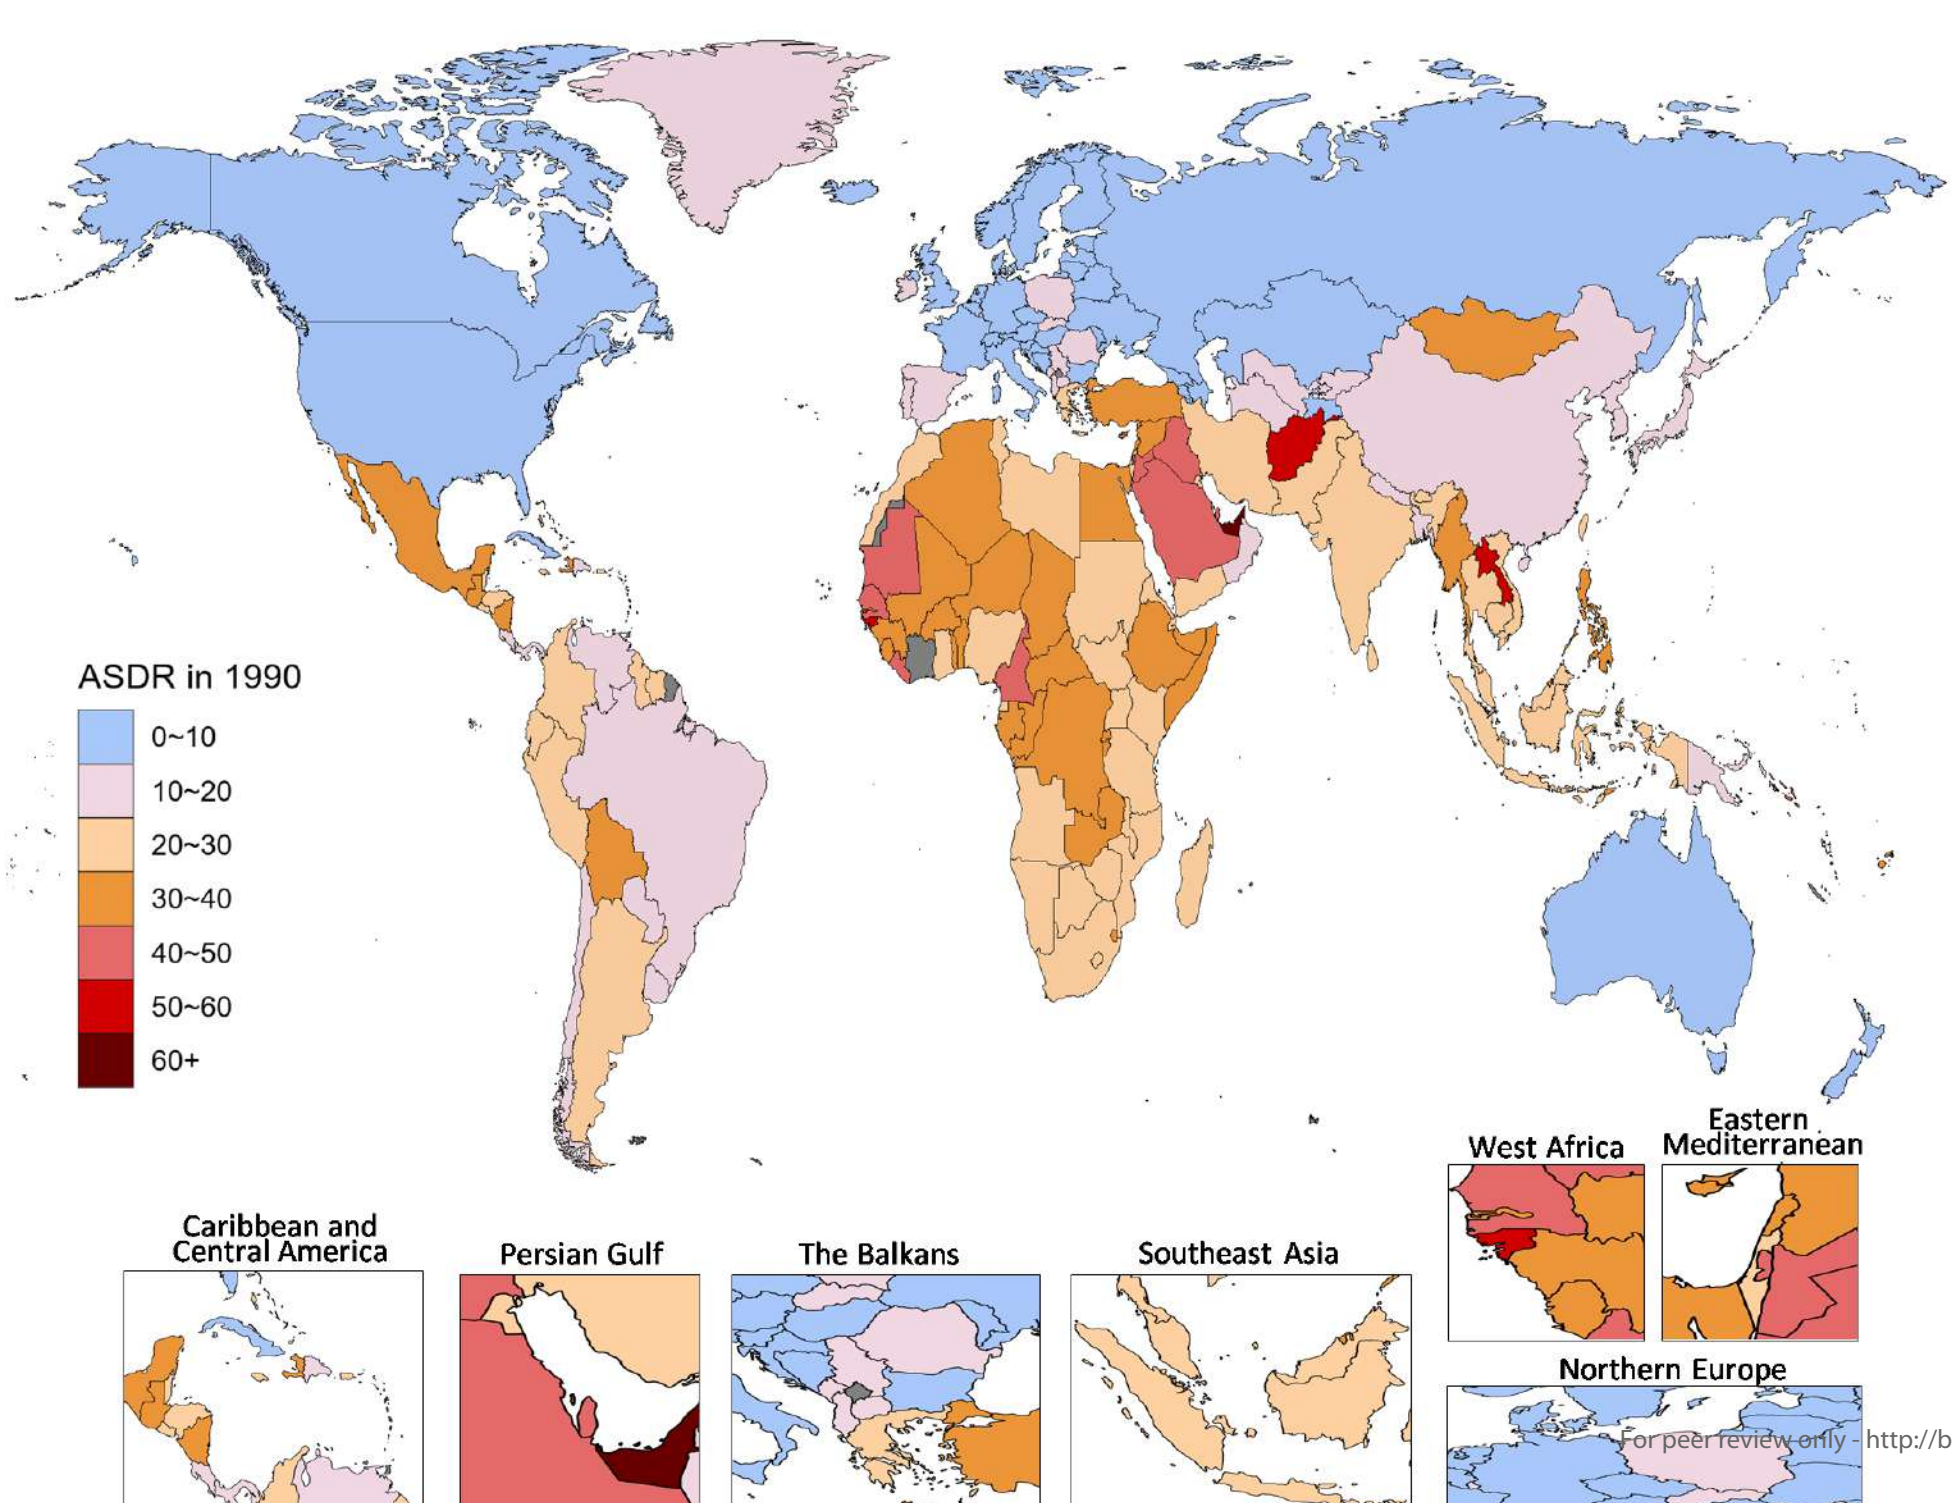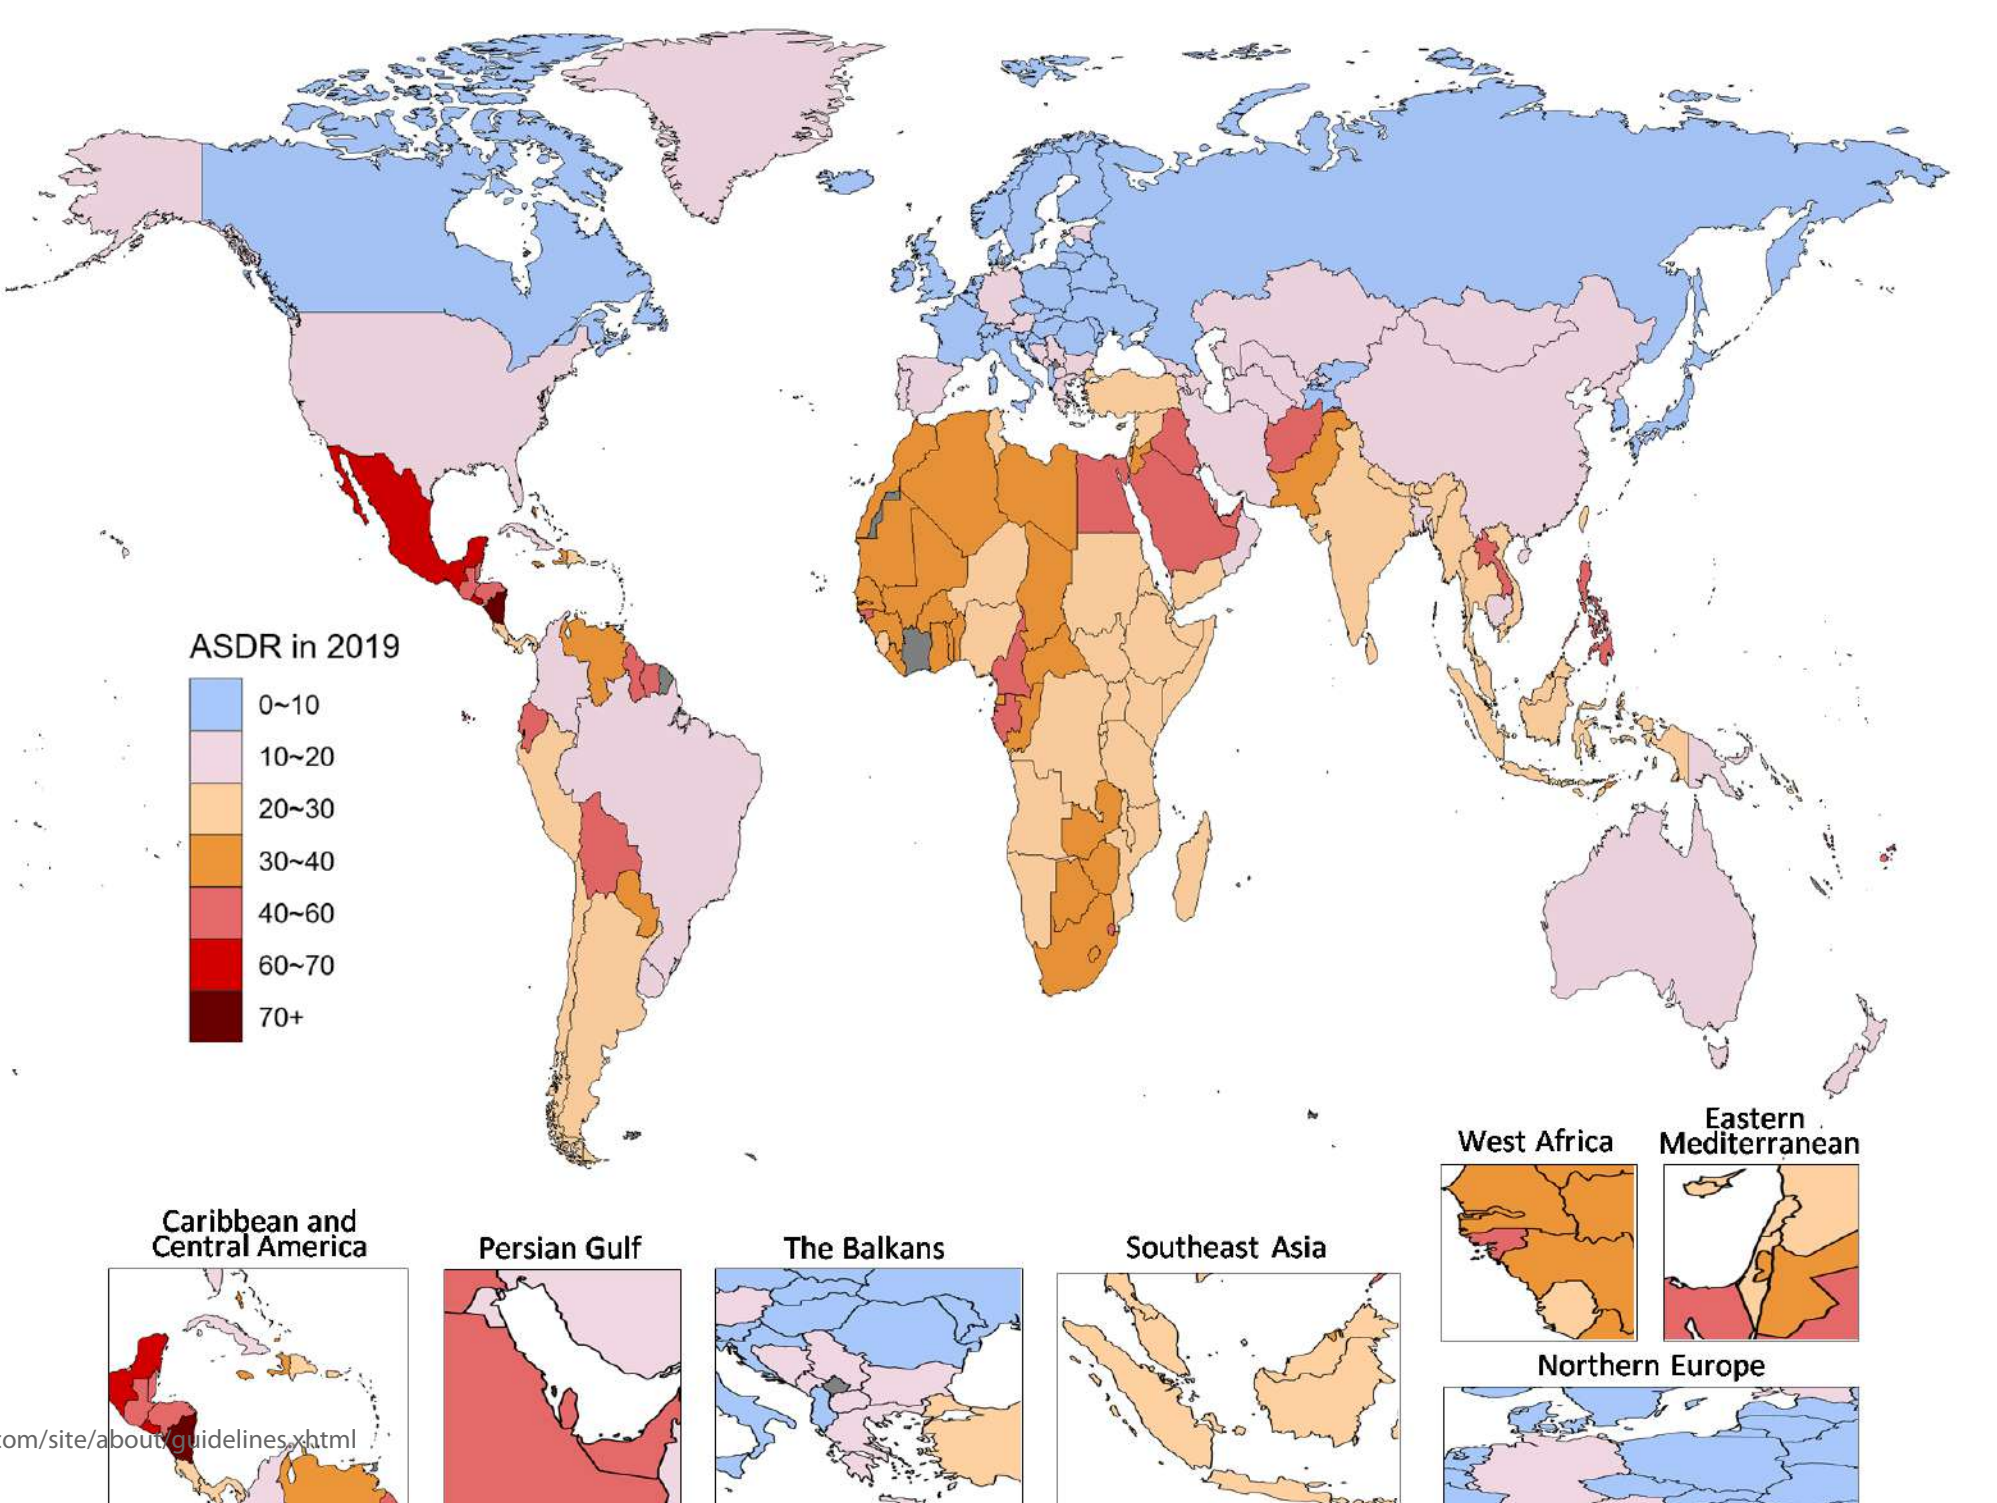



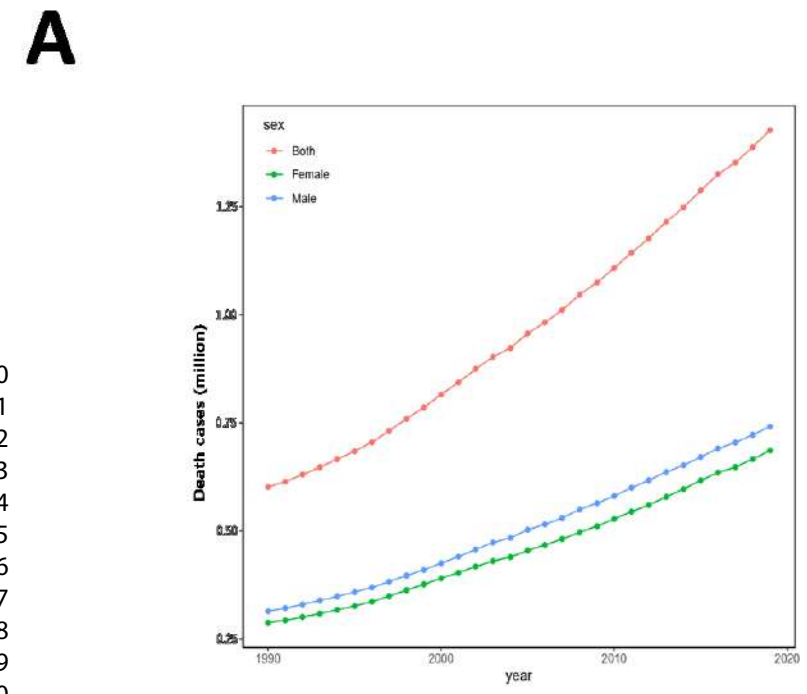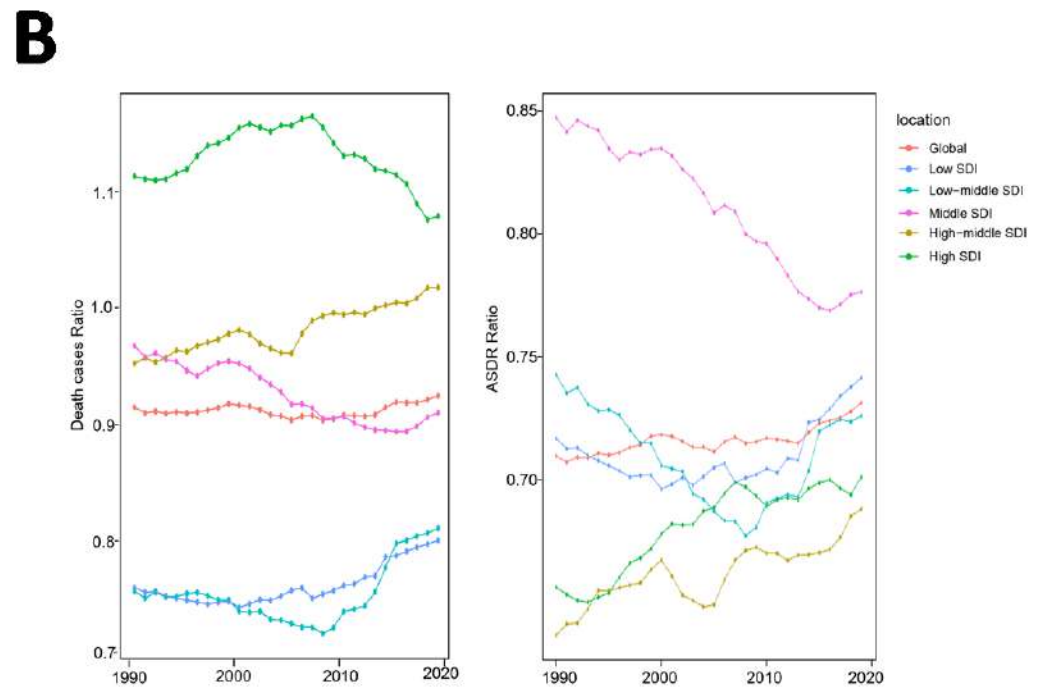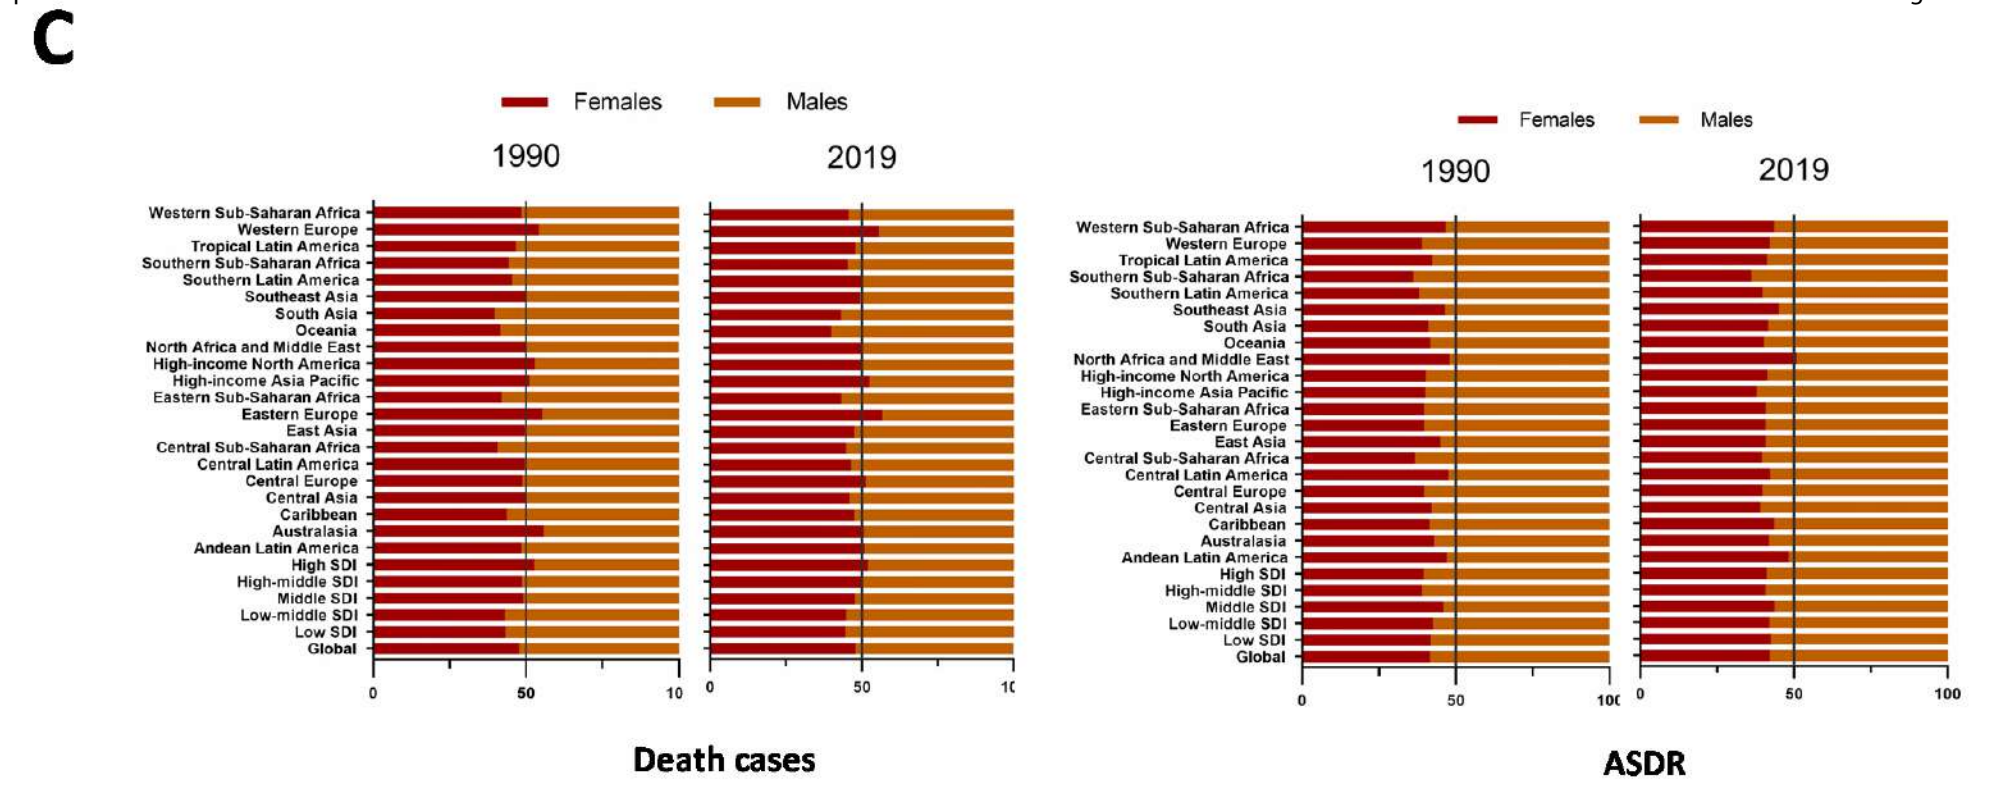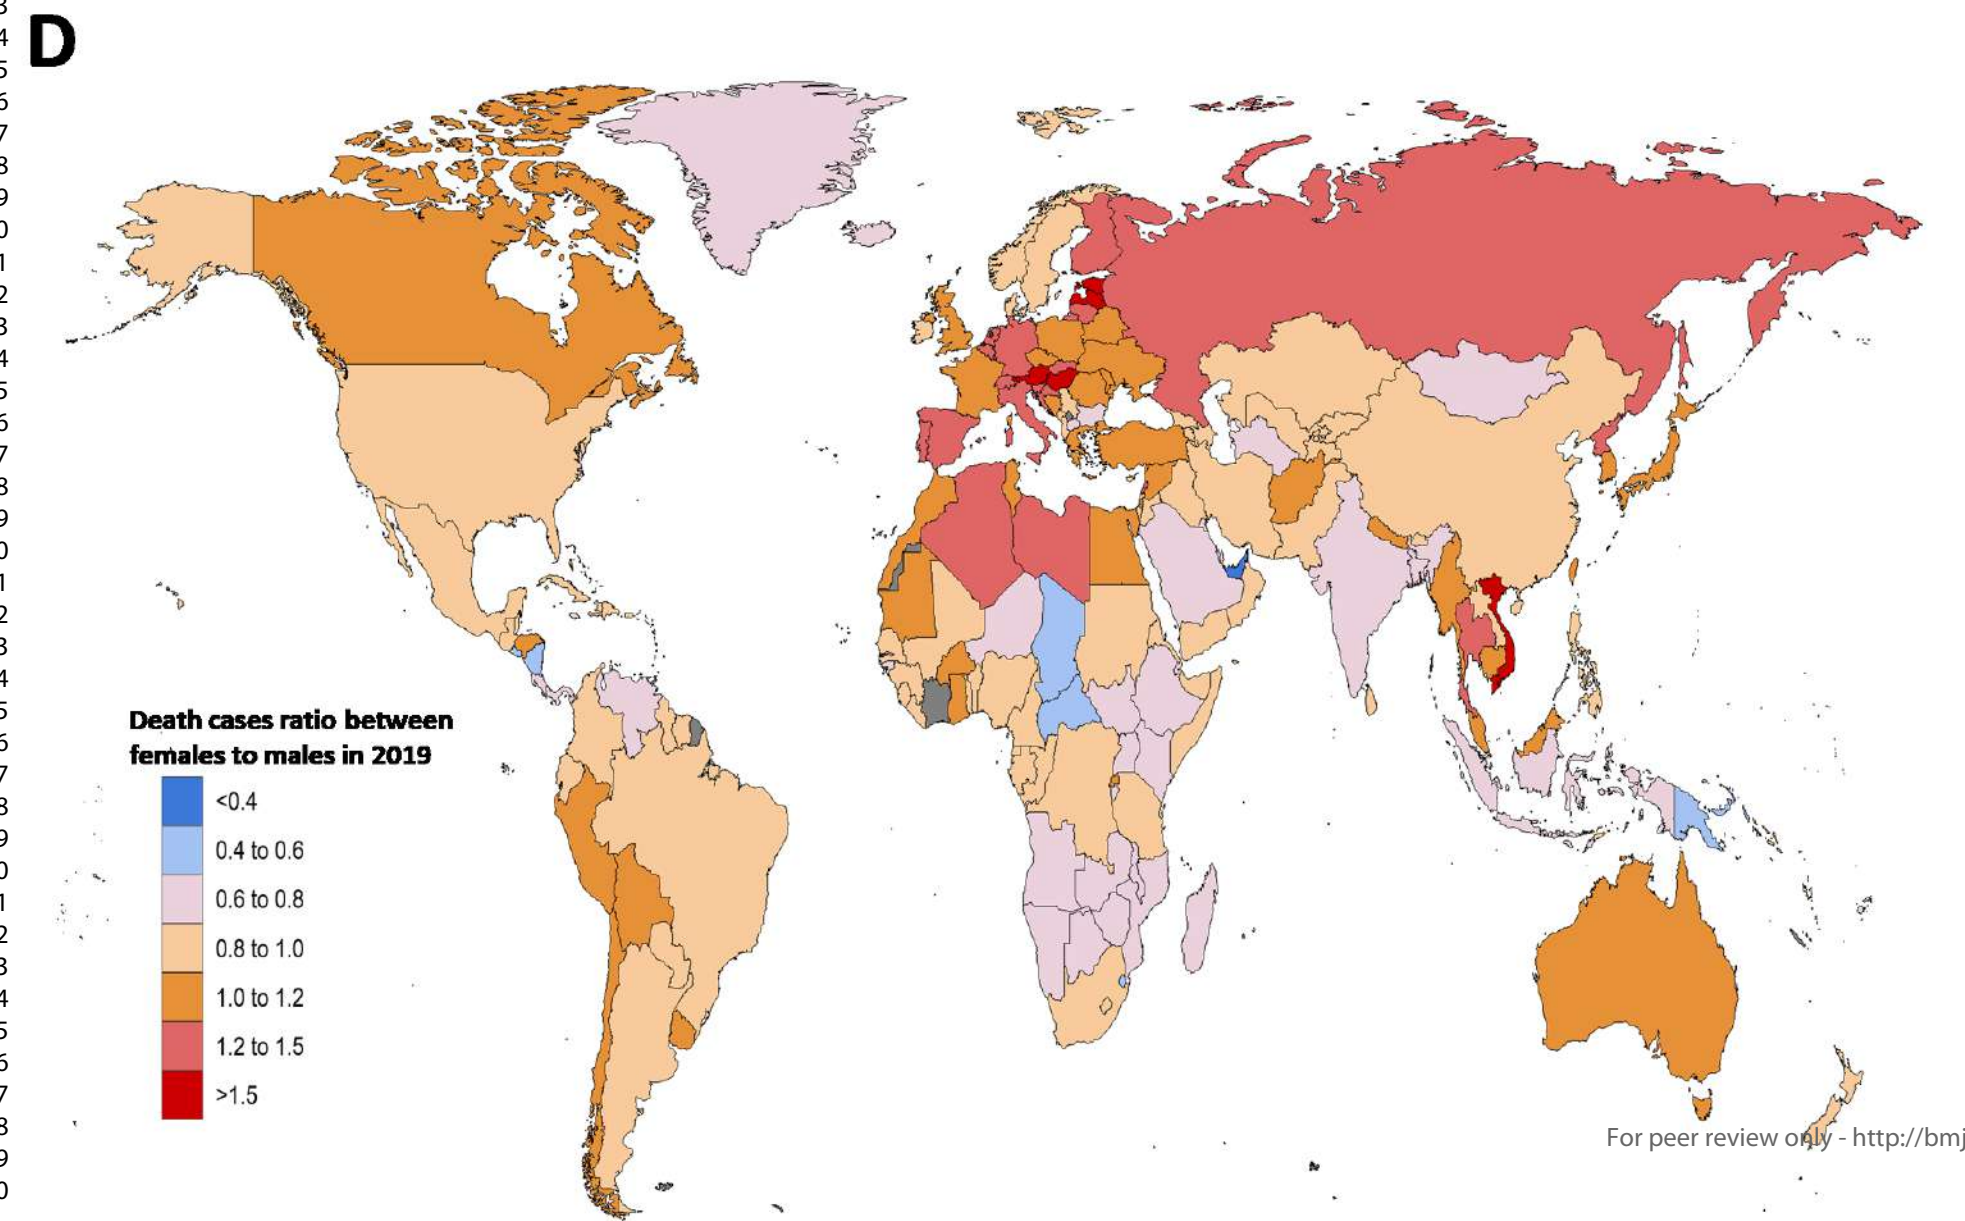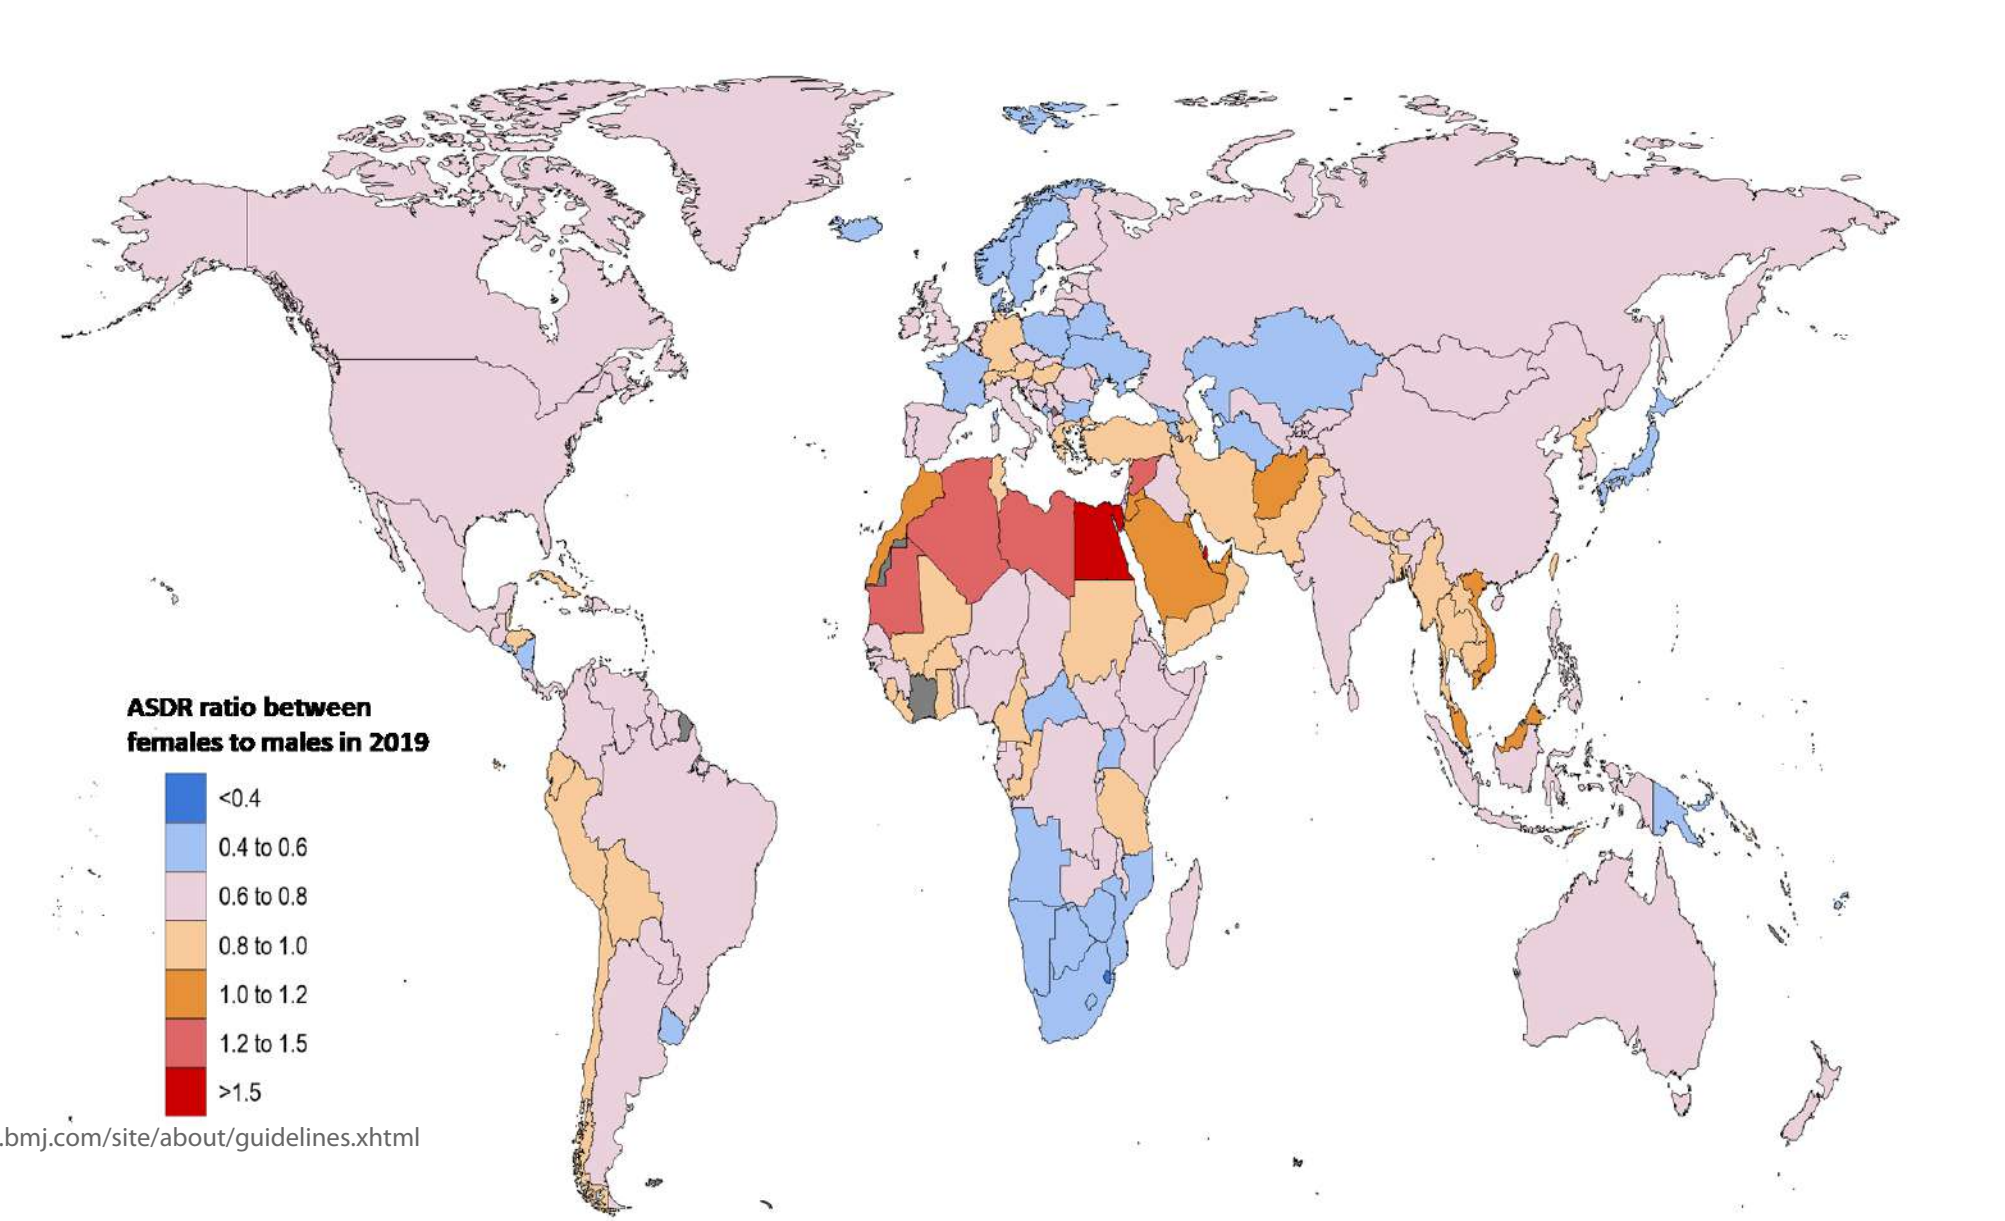



**A**

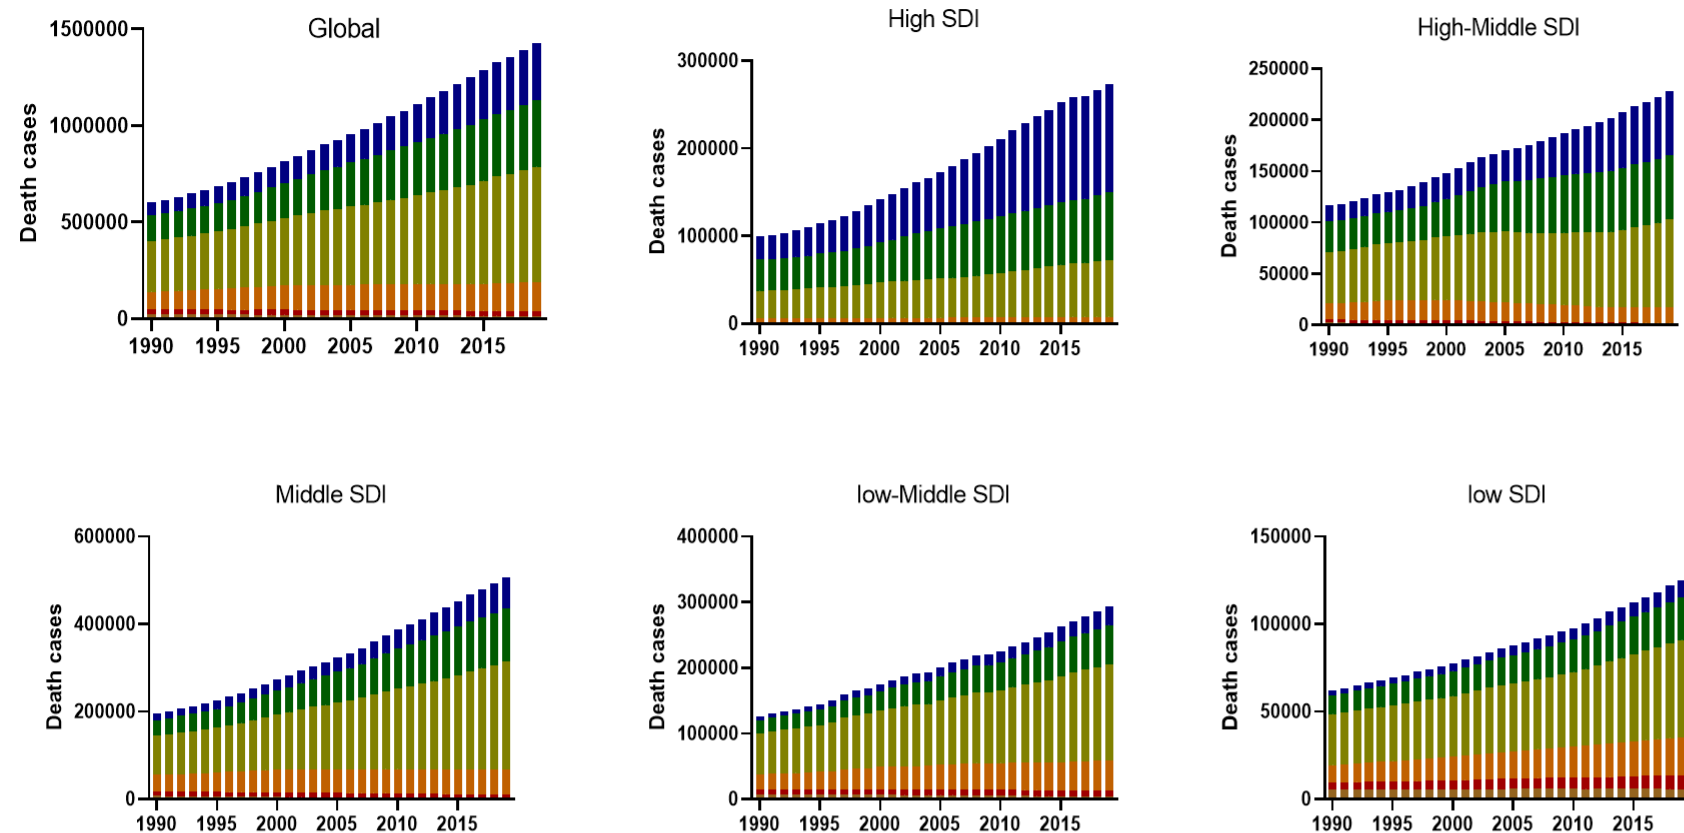

**B**

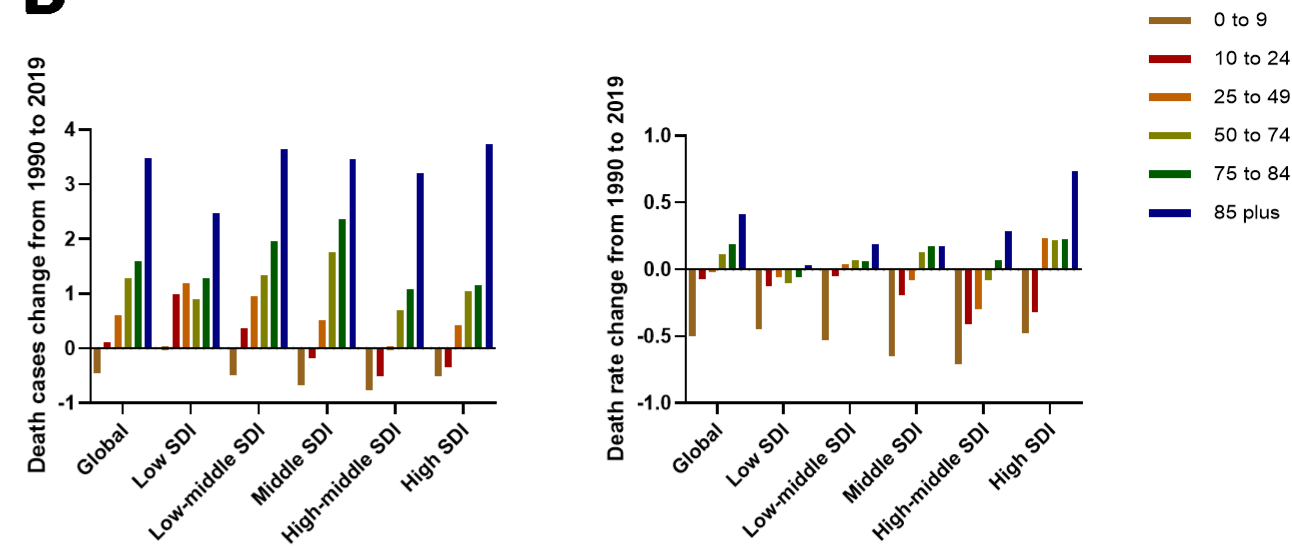

**C**

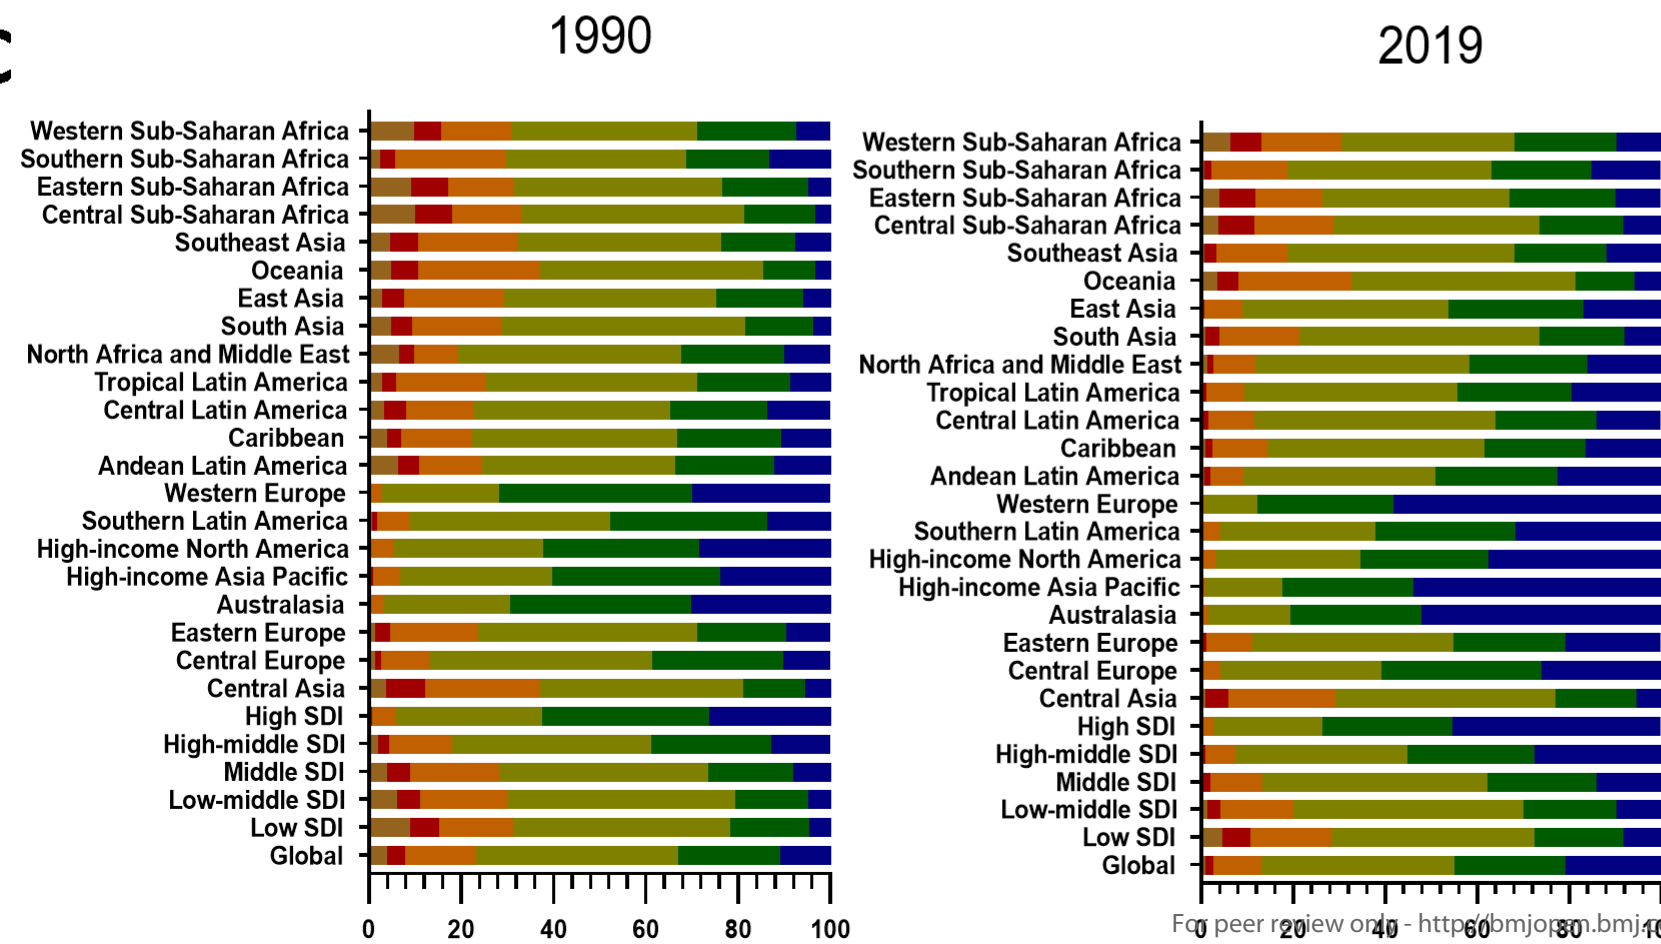

**D**

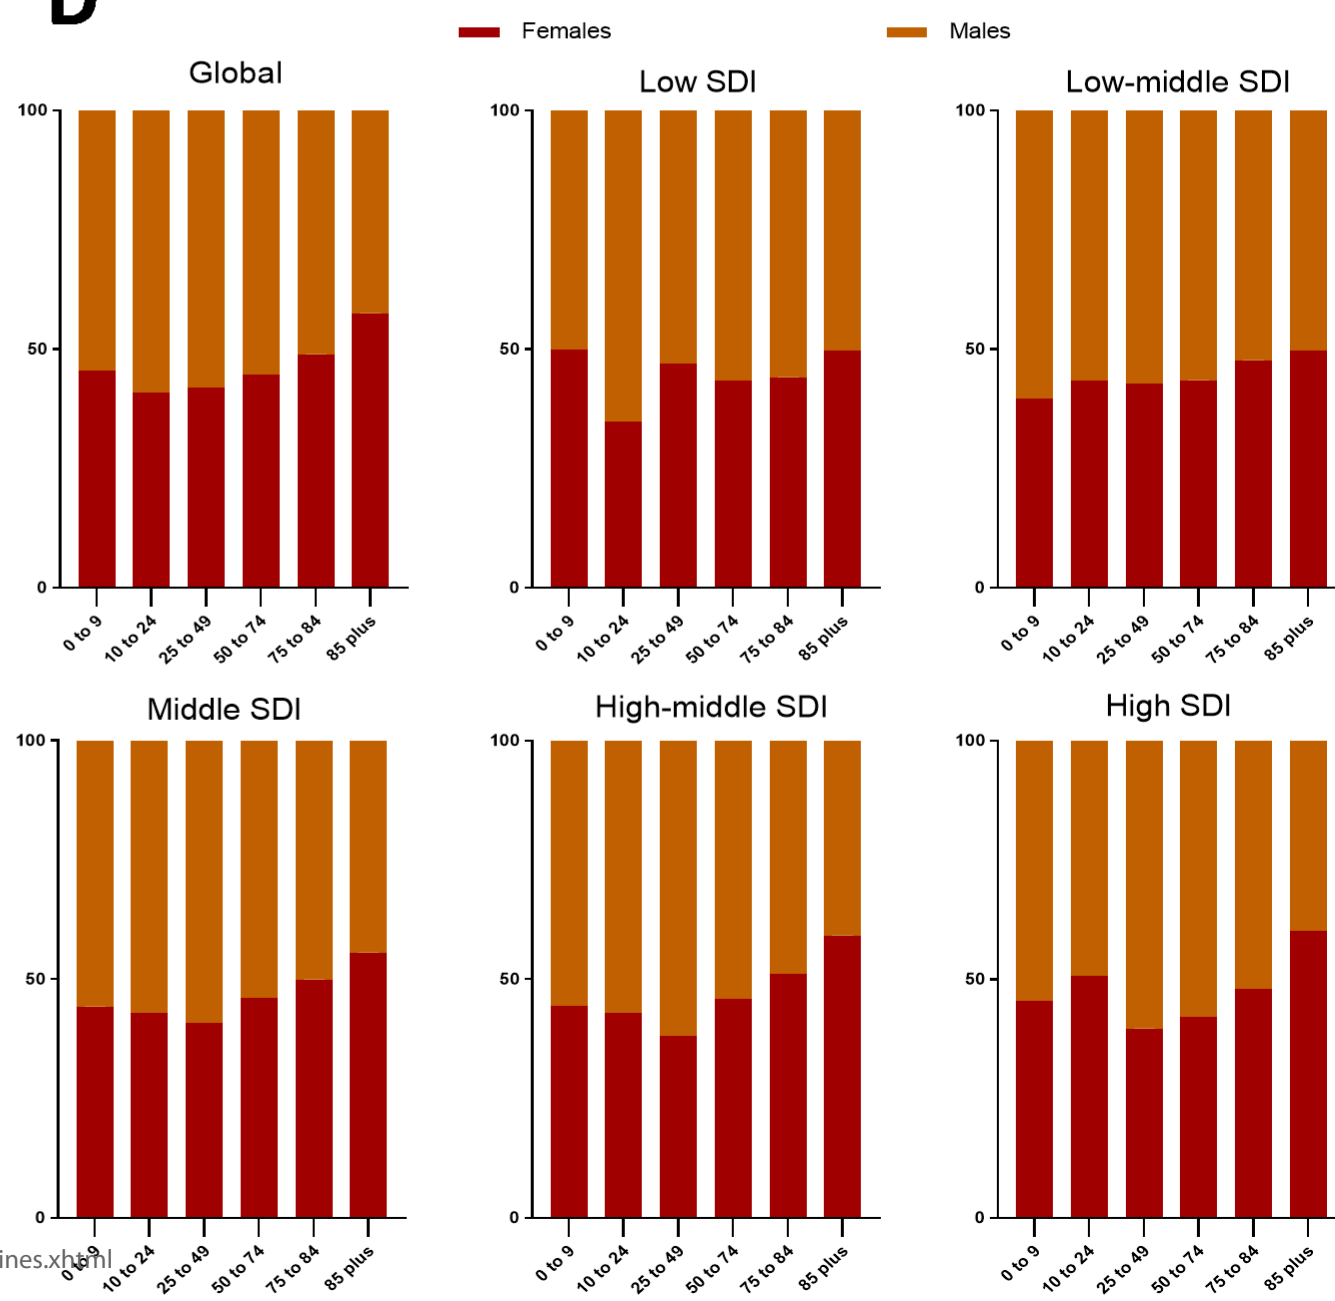



A

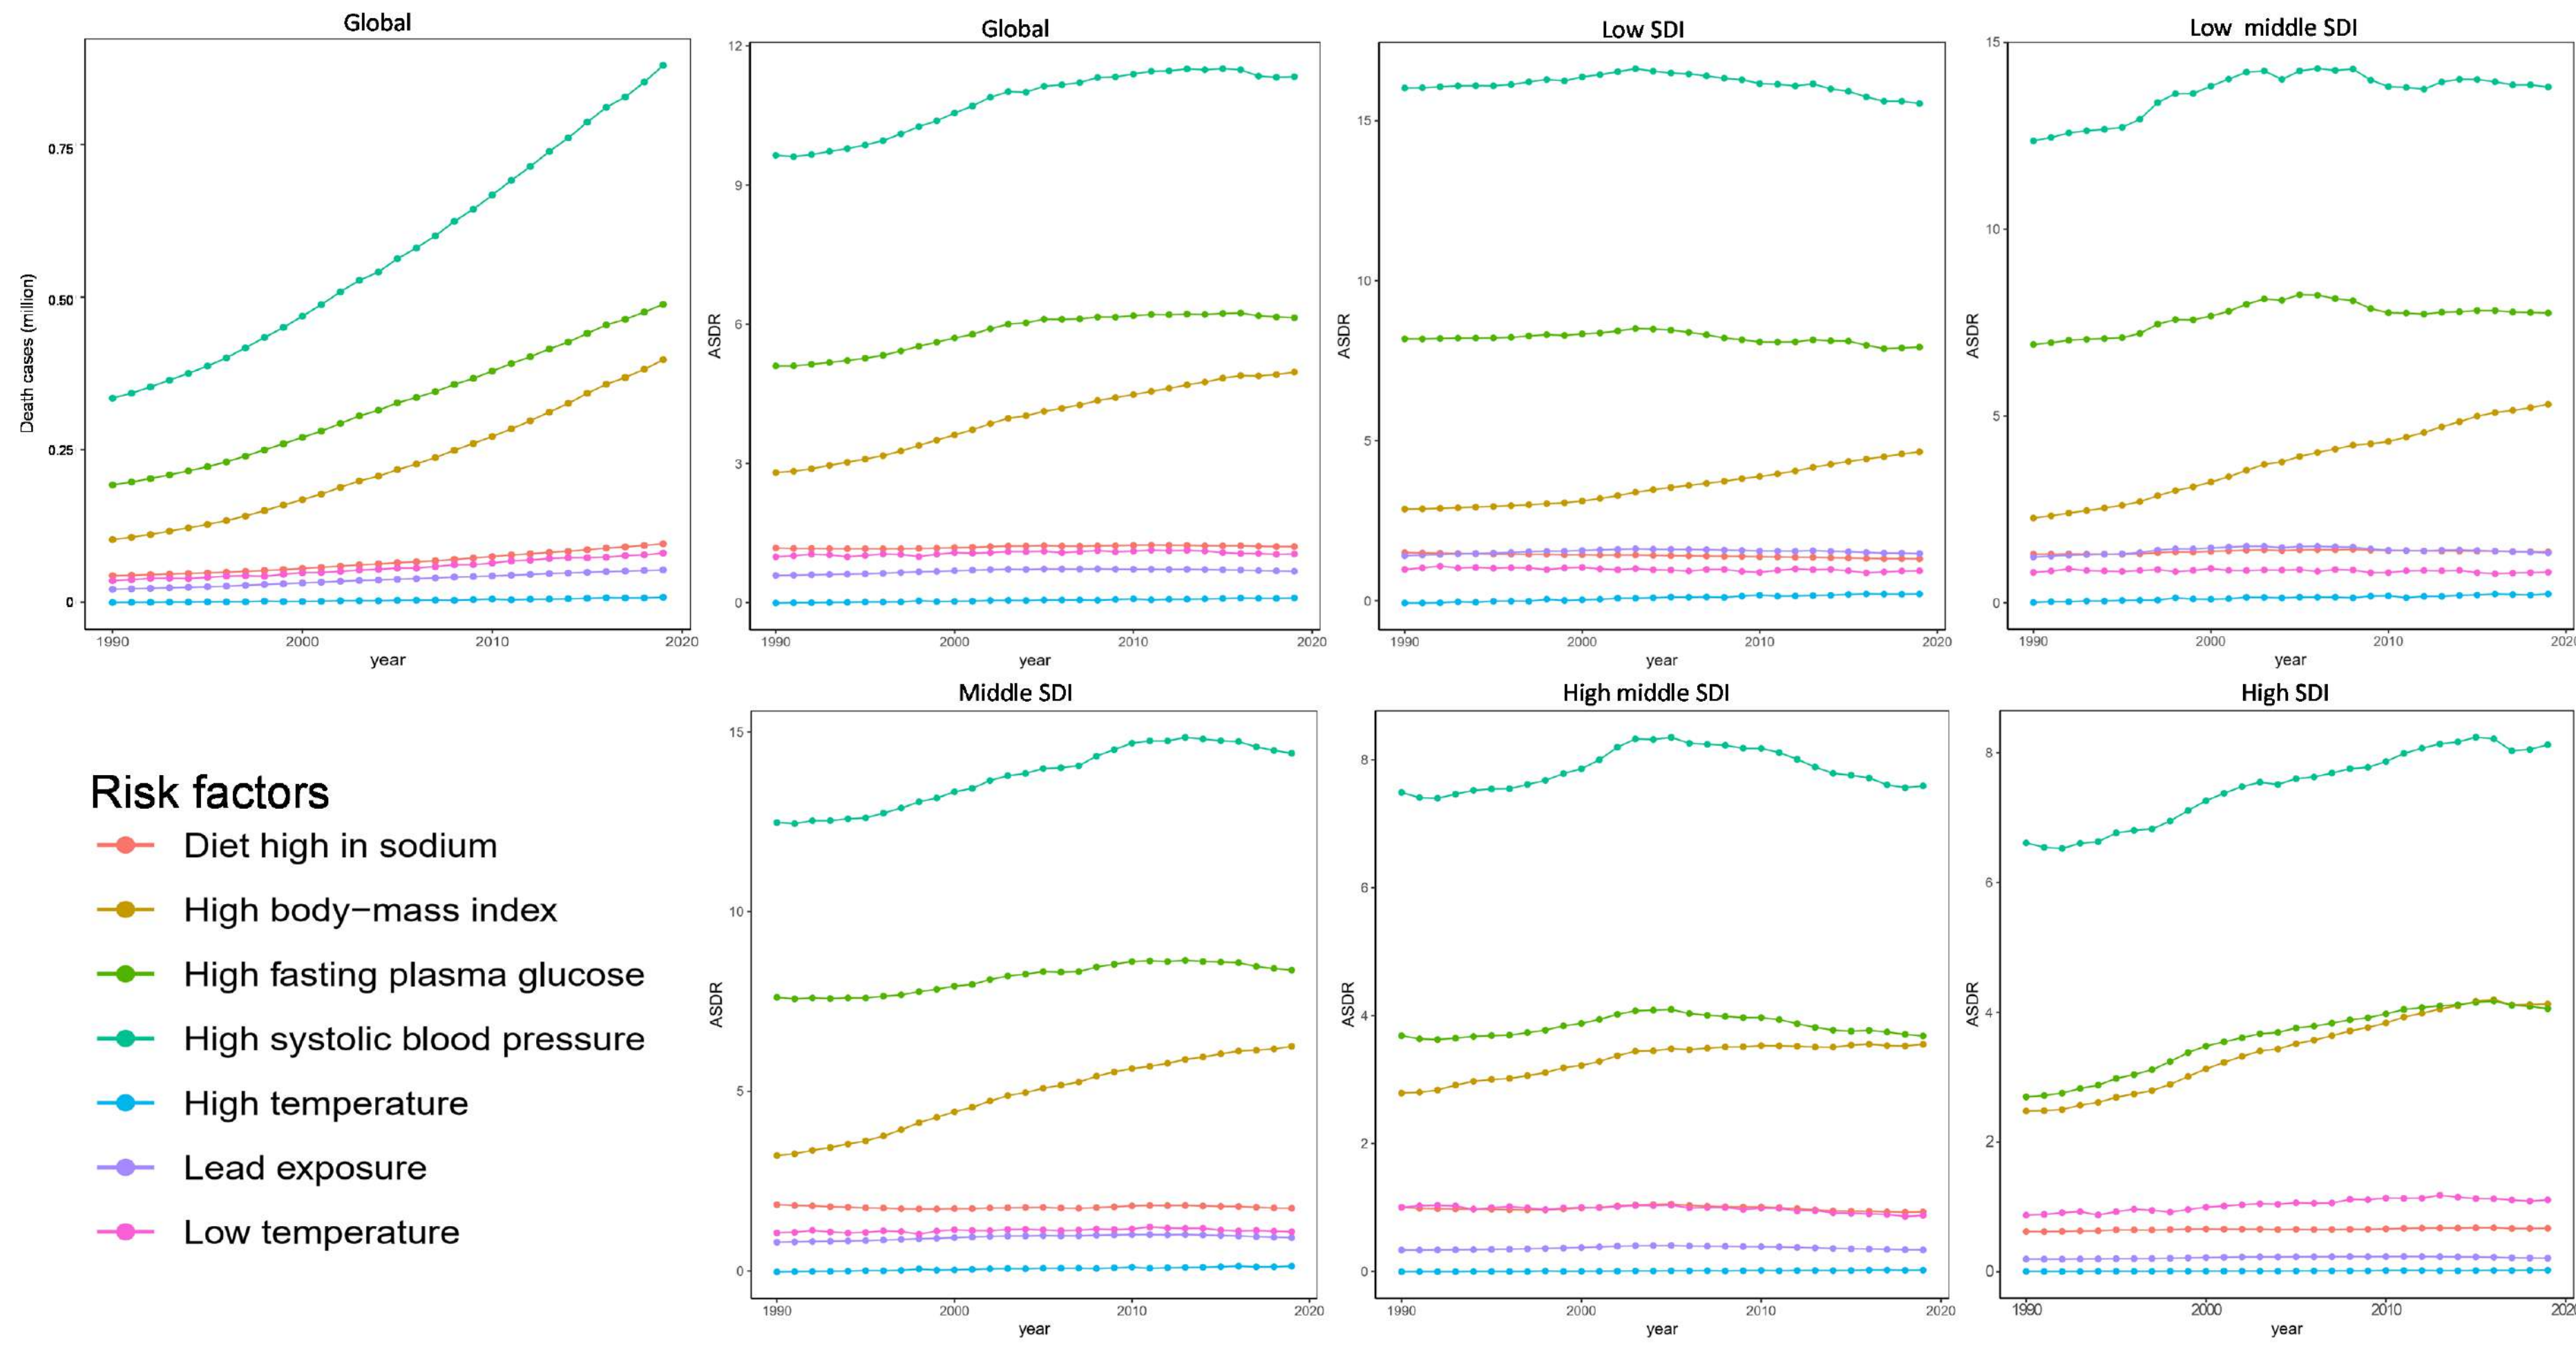

B

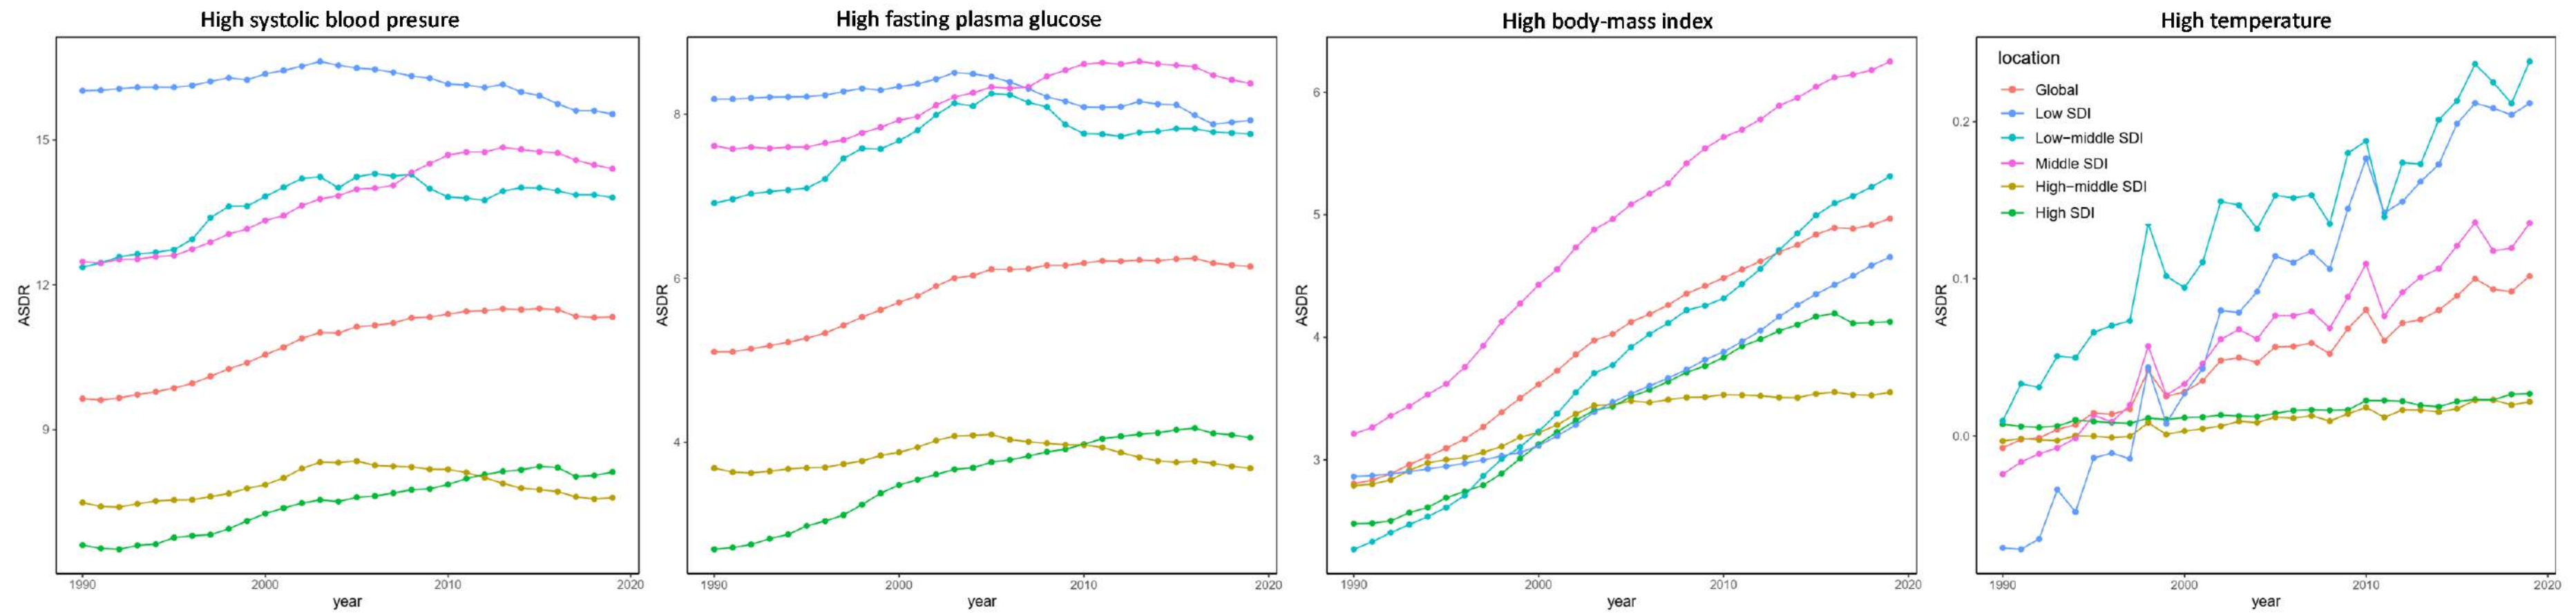

C

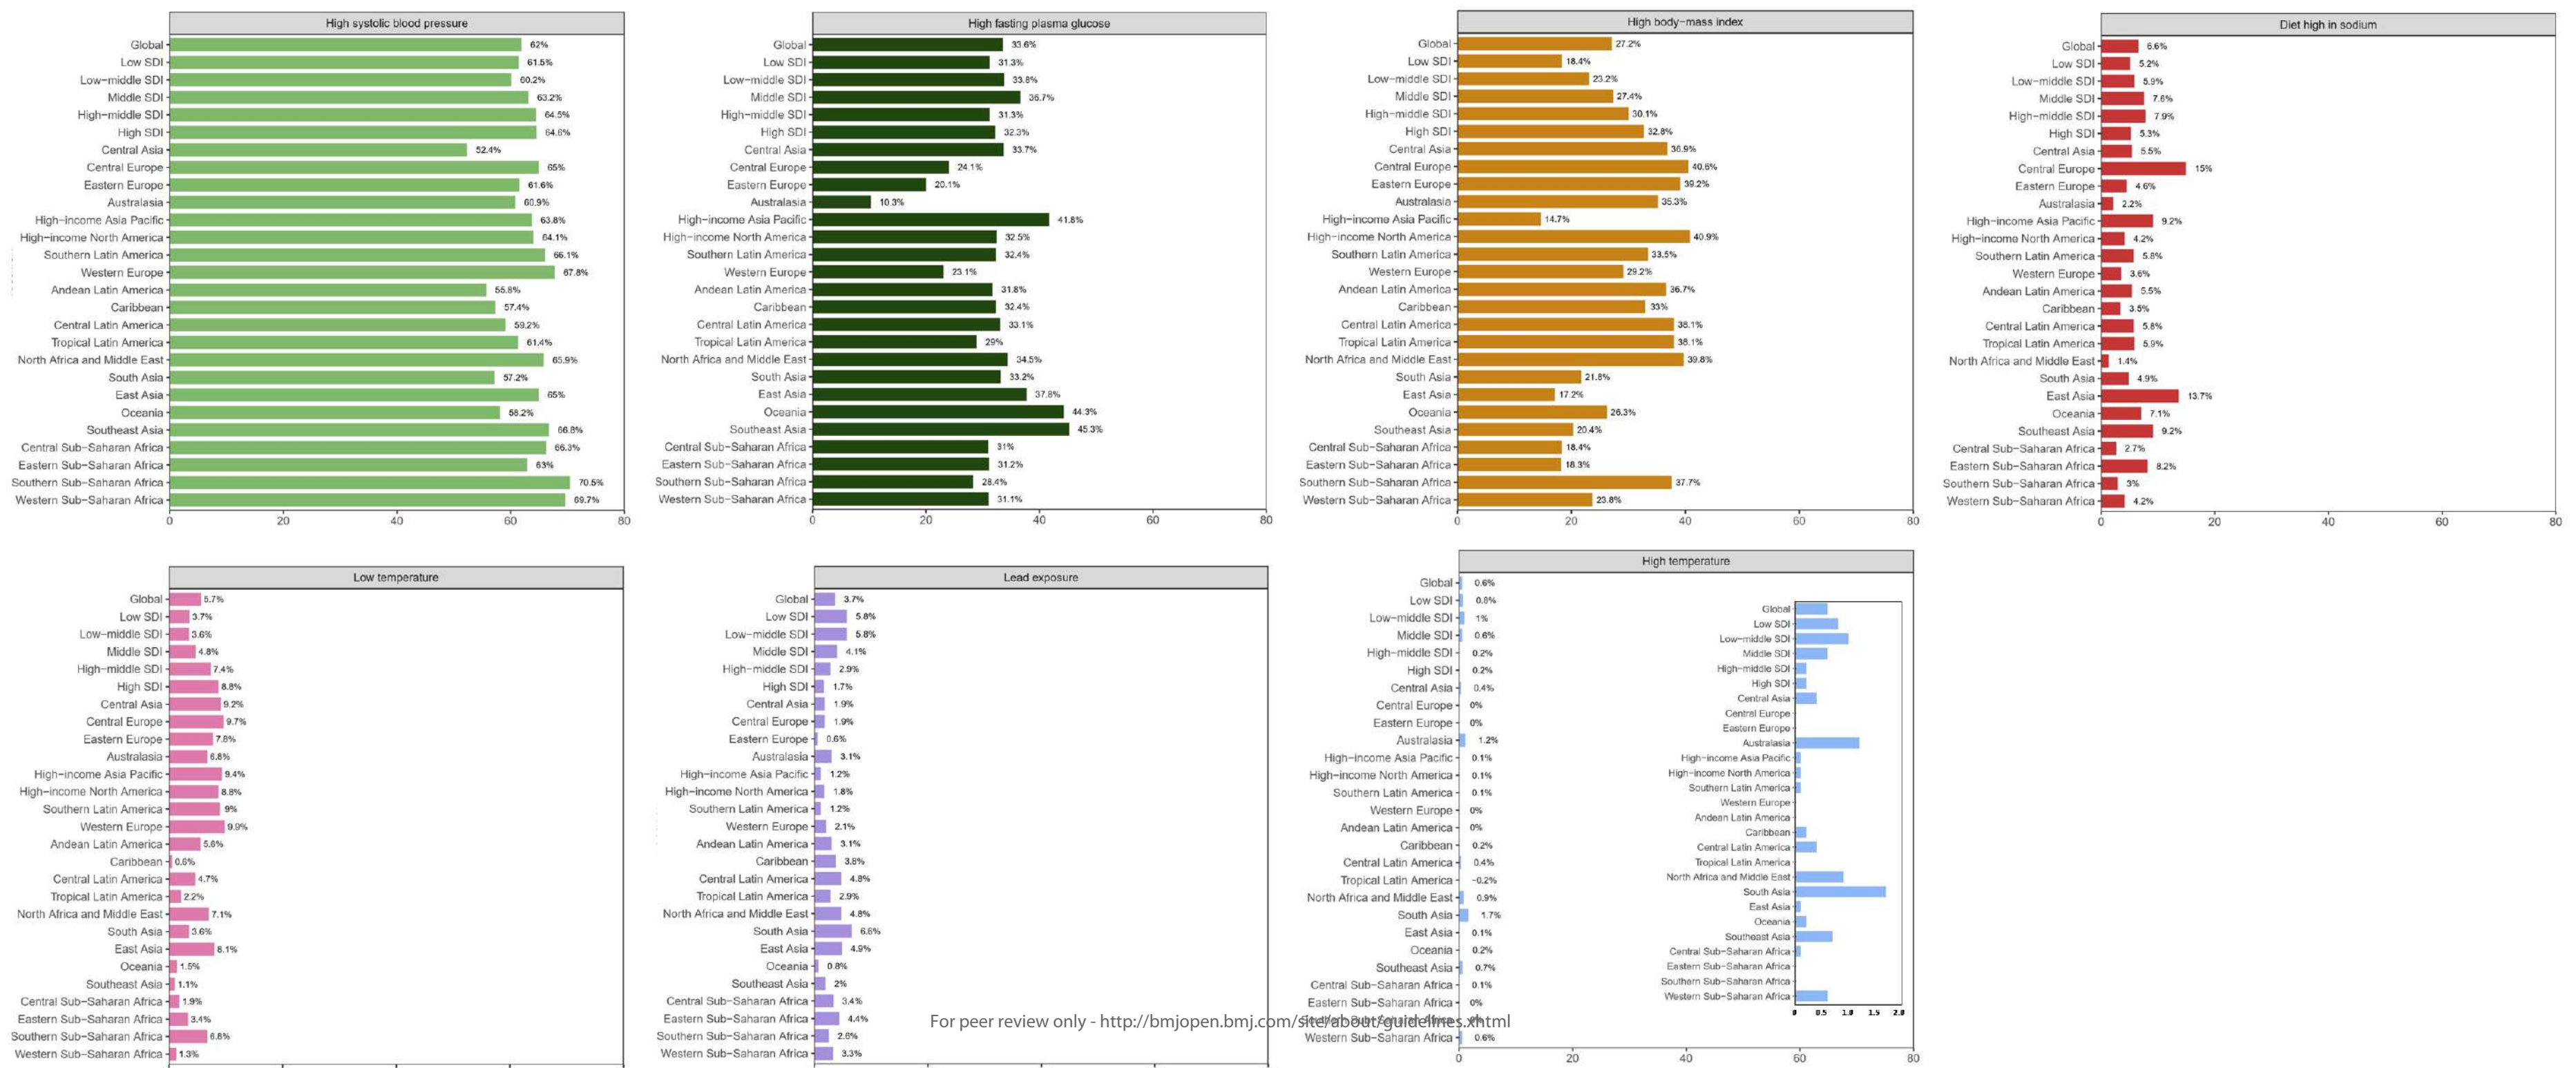



# Global Death Burden of Chronic Kidney Disease from 1990 to 2019

**Supplemental figure 1. Numbers of prevalence, incidence and DALYs of CKD in global and SDI areas in 1990 and 2019. DALYs, disability-adjusted life years.**

**Supplemental figure 2. The rank change of death numbers, ASDR, ASPR, ASR-DALYs, ASR-YLLs and ASR- YLDs of CKD from 1990 to 2019. DALYs, disability-adjusted life years. YLLs, years of life lost prematurely. YLDs, years lived with disability. ASDR, age-standardized death rate (per 100,000 population). ASPR, age-standardized prevalence rate (per 100,000 population). ASR-DALYs, age-standardized DALYs rate (per 100,000 population). ASR-YLLs, age-standardized YLLs rate (per 100,000 population). ASR-YLDs, age-standardized YLDs rate (per 100,000 population).**

**Supplemental figure 3. Temporal trends of ASDR, ASIR, ASPR, ASR-DALYs, ASR-YLLs and ASR- YLDs of CKD by genders from 1990 to 2019. DALYs, disability-adjusted life years. YLLs, years of life lost prematurely. YLDs, years lived with disability. ASDR, age-standardized death rate (per 100,000 population). ASPR, age-standardized prevalence rate (per 100,000 population). ASIR, age-standardized incidence rate (per 100,000 population). ASR-DALYs, age-standardized DALYs rate (per 100,000 population). ASR-YLLs, age-standardized YLLs rate (per 100,000 population). ASR-YLDs, age-standardized YLDs rate (per 100,000 population).**

**Supplemental figure 4. Relationship between ASR of prevalence, incidence and DALYs, with SDI from 1990 to 2019.**

**Supplemental figure 5. The proportions of death numbers in India, China and America in global.**

**Supplemental table 1. Prevalence cases and age-standardized prevalence rate (ASPR) of chronic kidney disease in 1990 and 2019, and the temporal trends**

1  
2  
3  
4  
5 **from 1990 to 2019 in global and regions.**  
6

7  
8 **Supplemental table 2. Incidence cases and age-standardized incidence rate (ASIR) of chronic kidney disease in 1990 and 2019, and the temporal trends from**  
9 **1990 to 2019 in global and regions.**  
10

11  
12 **Supplemental table 3. DALYs and age-standardized DALYs rate (ASR-DALYs) of chronic kidney disease in 1990 and 2019, and the temporal trends from**  
13 **1990 to 2019 in global and regions.**  
14

15  
16  
17 **Supplemental table 4. Deaths and age-standardized death rate (ASDR) of chronic kidney disease in 1990 and 2019, and the temporal trends from 1990 to 2019**  
18 **in 204 countries.**  
19

20  
21 **Supplemental table 5. Death cases ratio between females to males and age-standardized death rate (ASDR) ratio between females to males in 21 geographic**  
22 **regions from 1990 to 2019 in 21 regions.**  
23

24  
25  
26 **Supplemental table 6. Death cases ratio between females to males and age-standardized death rate (ASDR) ratio between females to males in 204 countries**  
27 **and territories from 1990 to 2019 in 204 countries.**  
28  
29  
30  
31  
32  
33  
34  
35  
36  
37  
38  
39  
40  
41  
42  
43  
44  
45  
46

1  
2  
3  
4  
5  
6  
7  
8  
9  
10  
11  
12  
13  
14  
15  
16  
17  
18  
19  
20  
21  
22  
23  
24  
25  
26  
27  
28  
29  
30  
31  
32  
33  
34  
35  
36  
37  
38  
39  
40  
41  
42  
43  
44  
45  
46

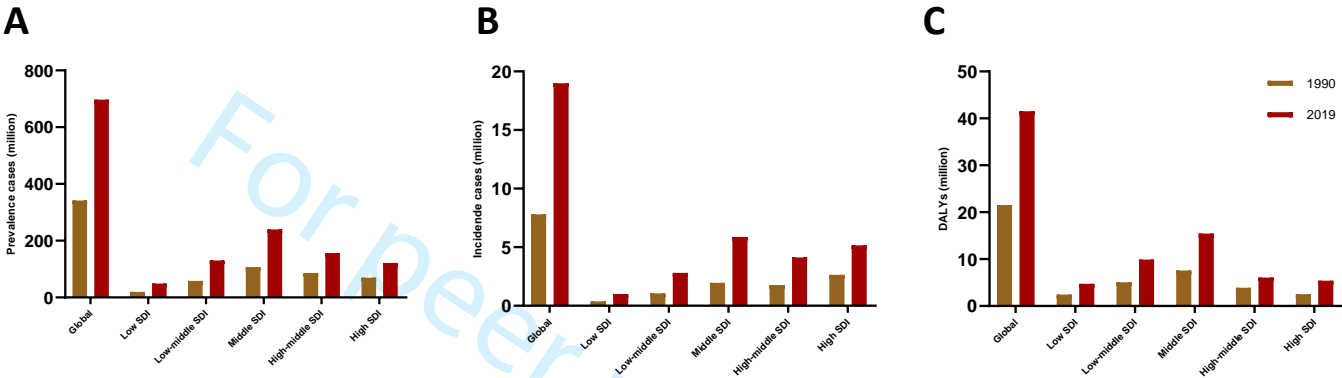

Supplemental figure 1. Numbers of prevalence, incidence and DALYs of CKD in global and SDI areas in 1990 and 2019. DALYs, disability-adjusted life years.

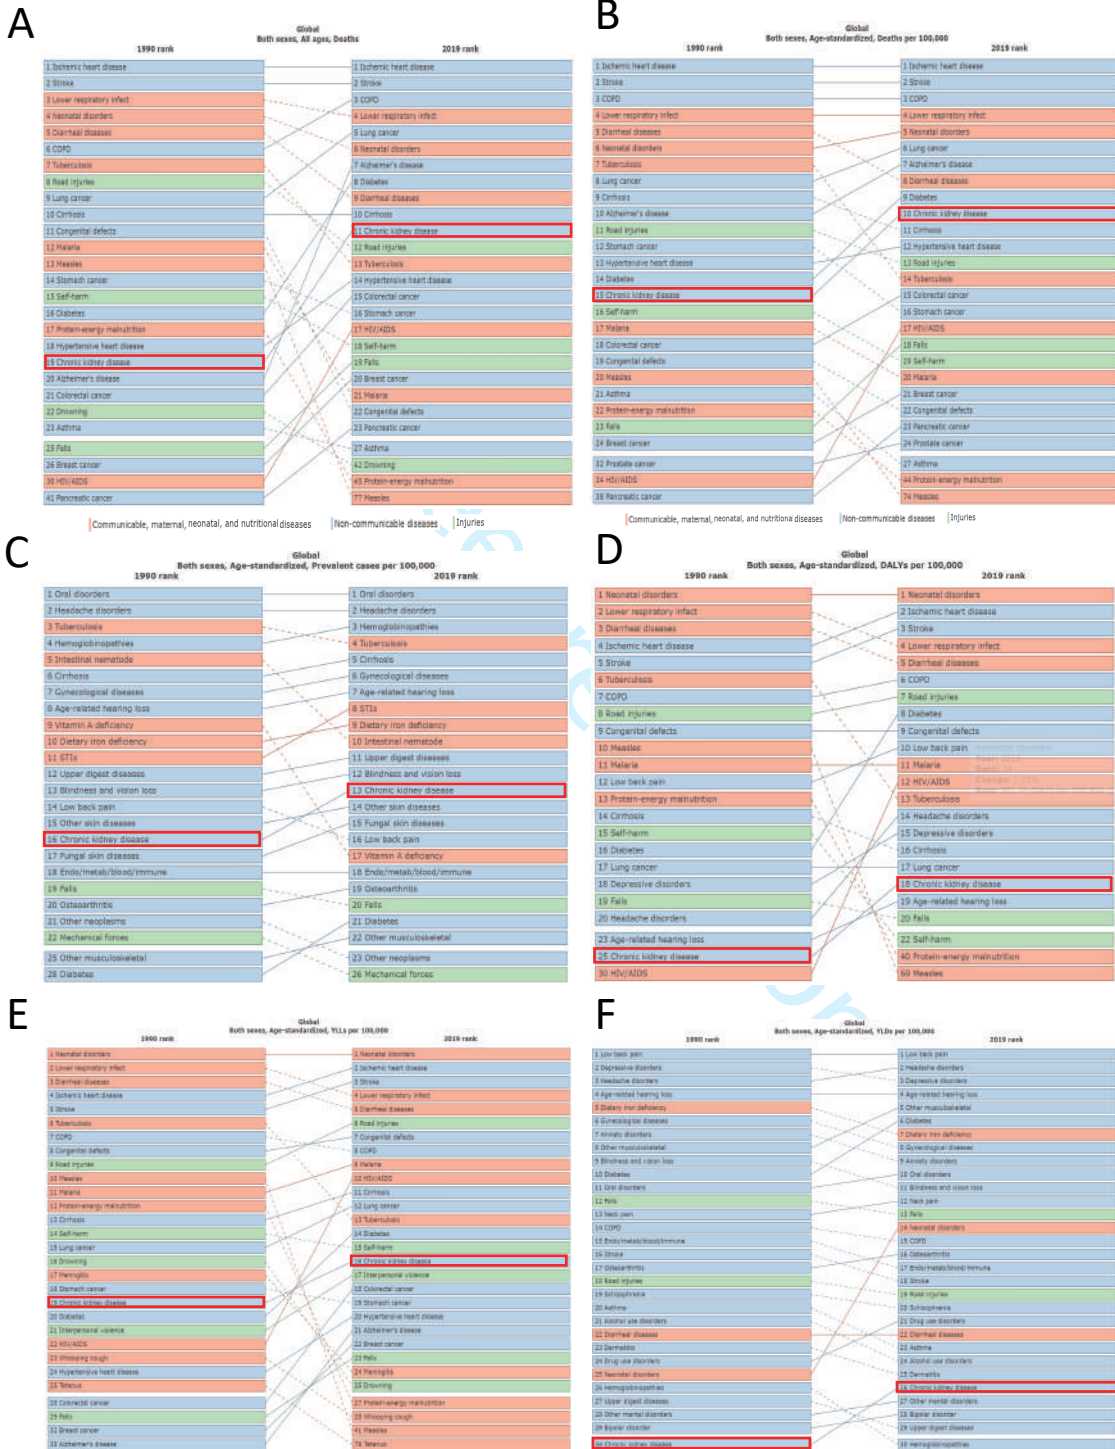

1  
2  
3  
4  
5 **Supplemental figure 2. The rank change of death numbers, ASDR, ASPR, ASR-DALYs, ASR-YLLs and ASR- YLDs of CKD from 1990 to 2019.** DALYs,  
6 disability-adjusted life years. YLLs, years of life lost prematurely. YLDs, years lived with disability. ASDR, age-standardized death rate (per 100,000 population).  
7 ASPR, age-standardized prevalence rate (per 100,000 population). ASR-DALYs, age-standardized DALYs rate (per 100,000 population). ASR-YLLs, age-standardized  
8 YLLs rate (per 100,000 population). ASR-YLDs, age-standardized YLDs rate (per 100,000 population).  
9  
10  
11  
12  
13  
14  
15  
16  
17  
18  
19  
20  
21  
22  
23  
24  
25  
26  
27  
28  
29  
30  
31  
32  
33  
34  
35  
36  
37  
38  
39  
40  
41  
42  
43  
44  
45  
46

For peer review only

Both

Female

Male

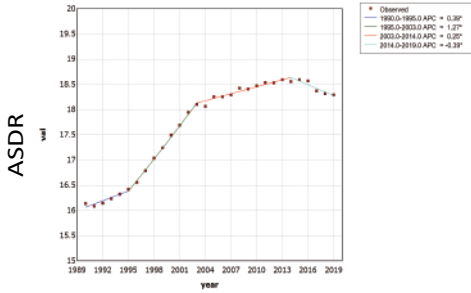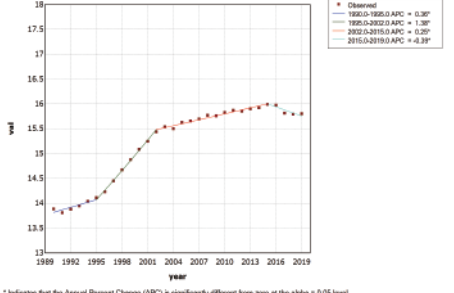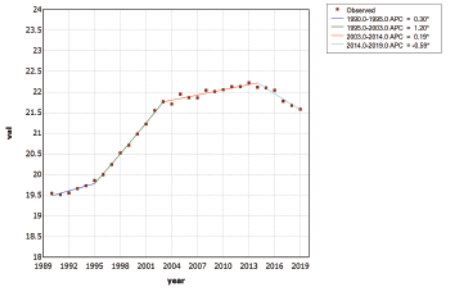

\*Indicates that the Annual Percent Change (APC) is significantly different from zero at the alpha = 0.05 level. Final Selected Model: 3 Joinkpoints.

\*Indicates that the Annual Percent Change (APC) is significantly different from zero at the alpha = 0.05 level. Final Selected Model: 3 Joinkpoints.

\*Indicates that the Annual Percent Change (APC) is significantly different from zero at the alpha = 0.05 level. Final Selected Model: 3 Joinkpoints.

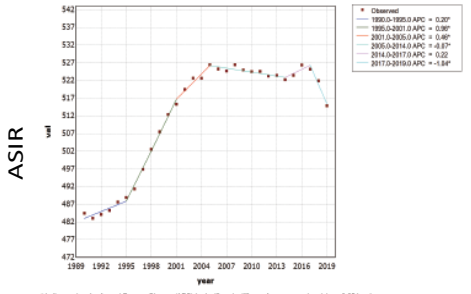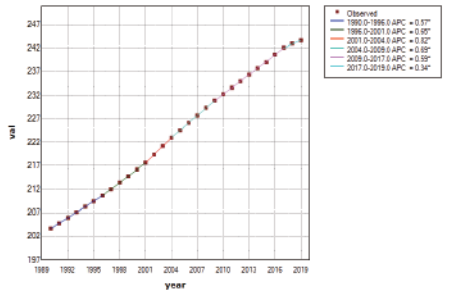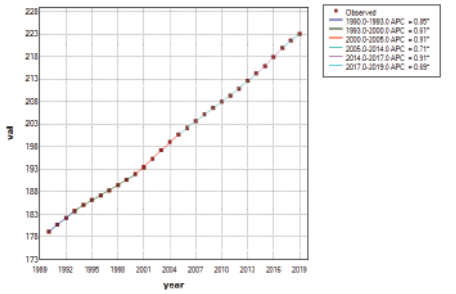

\*Indicates that the Annual Percent Change (APC) is significantly different from zero at the alpha = 0.05 level. Final Selected Model: 3 Joinkpoints.

\*Indicates that the Annual Percent Change (APC) is significantly different from zero at the alpha = 0.05 level. Final Selected Model: 3 Joinkpoints.

\*Indicates that the Annual Percent Change (APC) is significantly different from zero at the alpha = 0.05 level. Final Selected Model: 3 Joinkpoints.

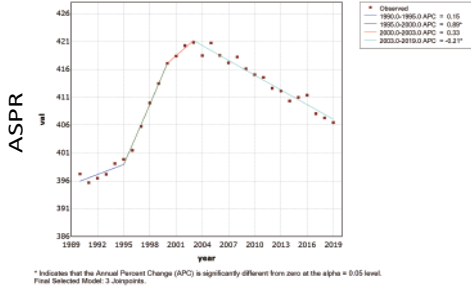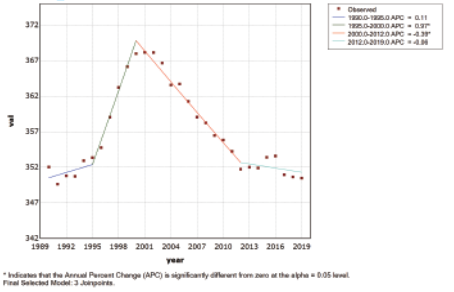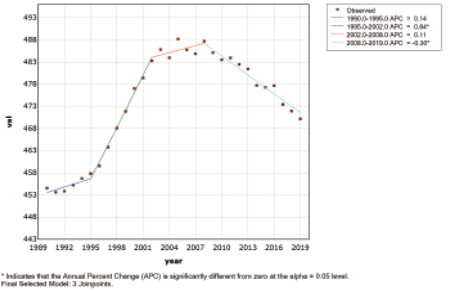

\*Indicates that the Annual Percent Change (APC) is significantly different from zero at the alpha = 0.05 level. Final Selected Model: 3 Joinkpoints.

\*Indicates that the Annual Percent Change (APC) is significantly different from zero at the alpha = 0.05 level. Final Selected Model: 3 Joinkpoints.

\*Indicates that the Annual Percent Change (APC) is significantly different from zero at the alpha = 0.05 level. Final Selected Model: 3 Joinkpoints.

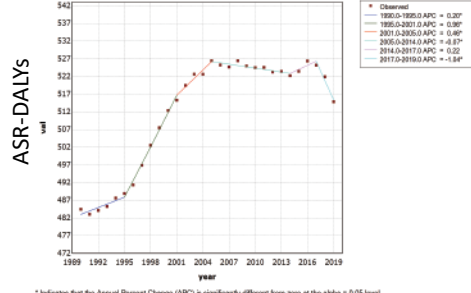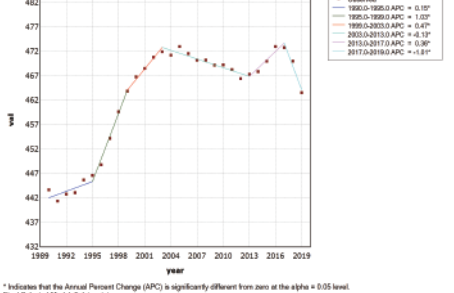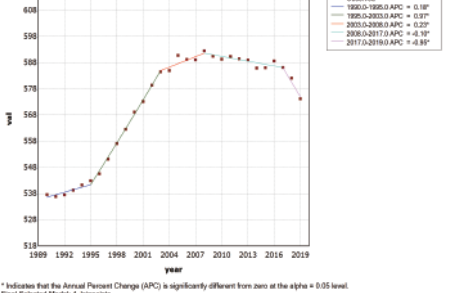

\*Indicates that the Annual Percent Change (APC) is significantly different from zero at the alpha = 0.05 level. Final Selected Model: 3 Joinkpoints.

\*Indicates that the Annual Percent Change (APC) is significantly different from zero at the alpha = 0.05 level. Final Selected Model: 3 Joinkpoints.

\*Indicates that the Annual Percent Change (APC) is significantly different from zero at the alpha = 0.05 level. Final Selected Model: 3 Joinkpoints.

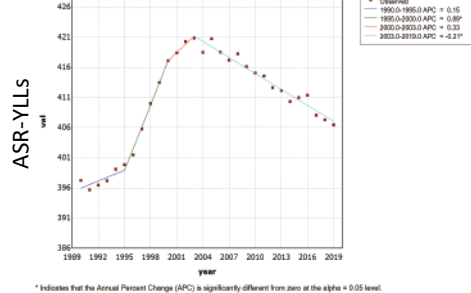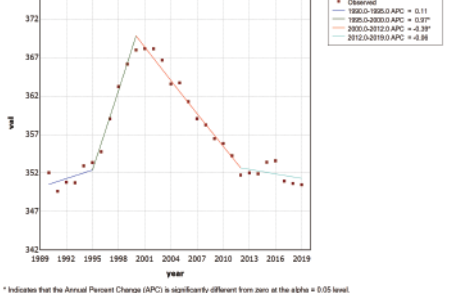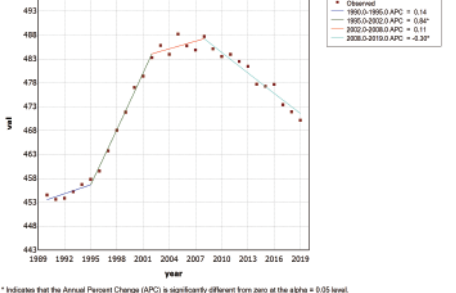

\*Indicates that the Annual Percent Change (APC) is significantly different from zero at the alpha = 0.05 level. Final Selected Model: 3 Joinkpoints.

\*Indicates that the Annual Percent Change (APC) is significantly different from zero at the alpha = 0.05 level. Final Selected Model: 3 Joinkpoints.

\*Indicates that the Annual Percent Change (APC) is significantly different from zero at the alpha = 0.05 level. Final Selected Model: 3 Joinkpoints.

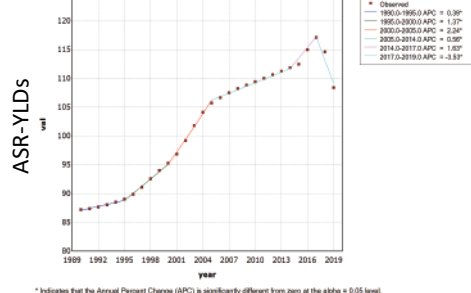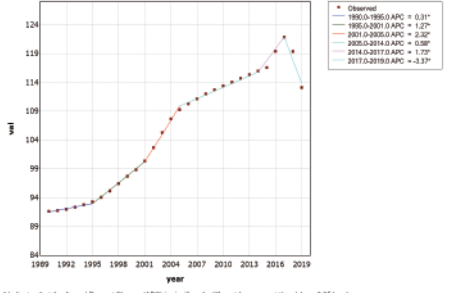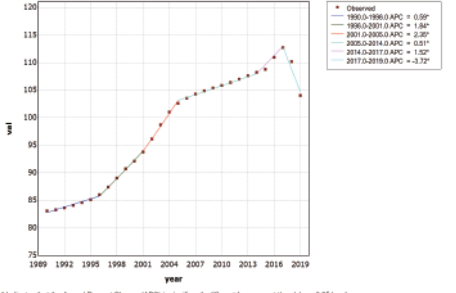

\*Indicates that the Annual Percent Change (APC) is significantly different from zero at the alpha = 0.05 level. Final Selected Model: 3 Joinkpoints.

\*Indicates that the Annual Percent Change (APC) is significantly different from zero at the alpha = 0.05 level. Final Selected Model: 3 Joinkpoints.

\*Indicates that the Annual Percent Change (APC) is significantly different from zero at the alpha = 0.05 level. Final Selected Model: 3 Joinkpoints.



1  
2  
3  
4  
5 **Supplemental figure 3. Temporal trends of ASDR, ASIR, ASPR, ASR-DALYs, ASR-YLLs and ASR- YLDs of CKD by genders from 1990 to 2019.** DALYs,  
6 disability-adjusted life years. YLLs, years of life lost prematurely. YLDs, years lived with disability. ASDR, age-standardized death rate (per 100,000 population).  
7 ASPR, age-standardized prevalence rate (per 100,000 population). ASIR, age-standardized incidence rate (per 100,000 population). ASR-DALYs, age-standardized  
8 DALYs rate (per 100,000 population). ASR-YLLs, age-standardized YLLs rate (per 100,000 population). ASR-YLDs, age-standardized YLDs rate (per 100,000  
9 population).  
10  
11  
12  
13  
14  
15  
16  
17  
18  
19  
20  
21  
22  
23  
24  
25  
26  
27  
28  
29  
30  
31  
32  
33  
34  
35  
36  
37  
38  
39  
40  
41  
42  
43  
44  
45  
46

For peer review only

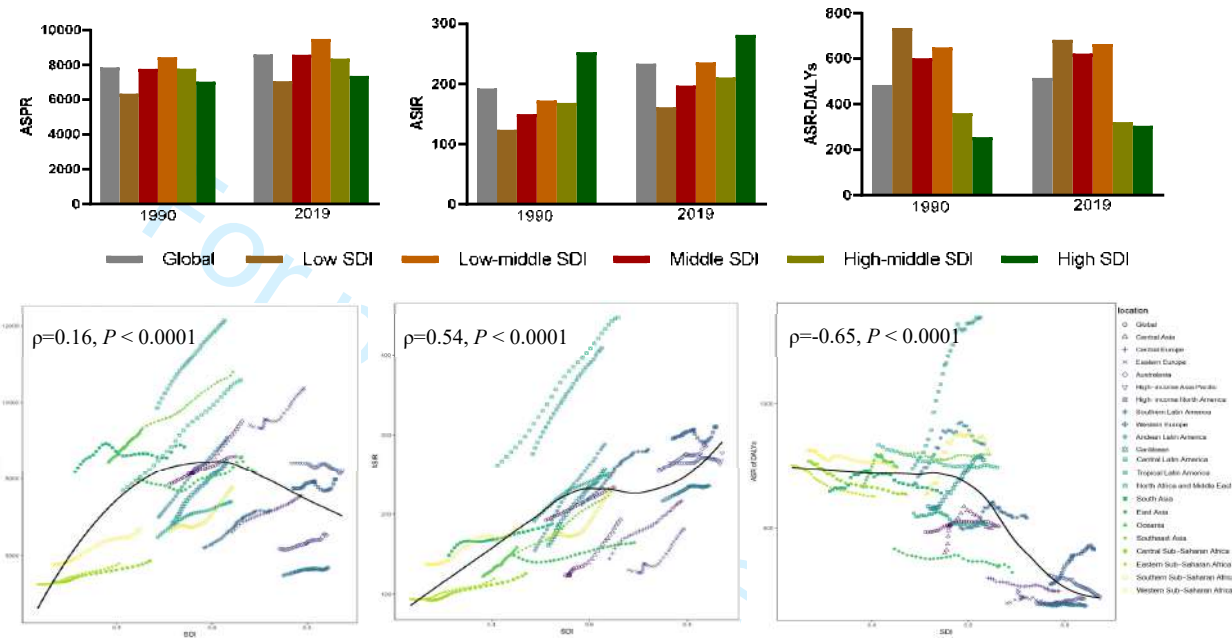

Supplemental figure 4. Relationship between ASR of prevalence, incidence and DALYs, with SDI from 1990 to 2019.

1  
2  
3  
4  
5  
6  
7  
8  
9  
10  
11  
12  
13  
14  
15  
16  
17  
18  
19  
20  
21  
22  
23  
24  
25  
26  
27  
28  
29  
30  
31  
32  
33  
34  
35  
36  
37  
38  
39  
40  
41  
42  
43  
44  
45  
46  
47  
48  
49  
50  
51  
52  
53  
54  
55  
56  
57  
58  
59  
60

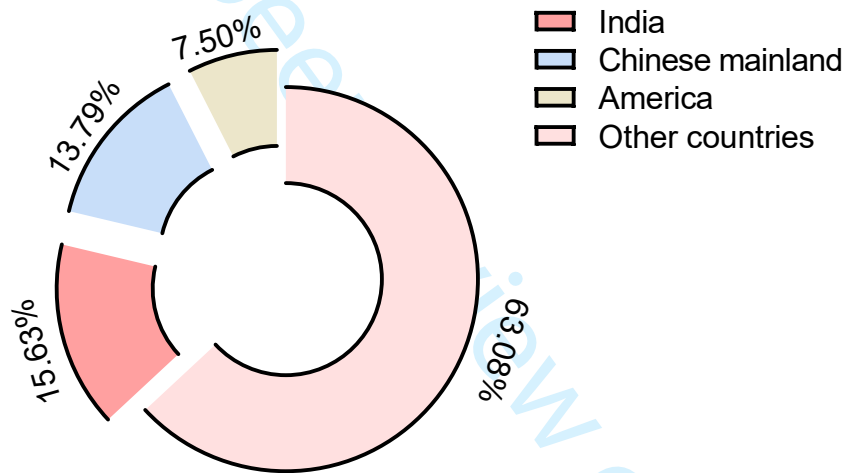

Supplemental figure 5. The proportions of death numbers in India, China and America in global.

1  
2  
3  
4  
5 **Supplemental table 1. Prevalence cases and age-standardized prevalence rate (ASPR) of chronic kidney disease in 1990 and 2019, and the temporal trends**  
6 **from 1990 to 2019 in global and regions.**  
7  
8  
9  
10  
11  
12  
13  
14  
15  
16  
17  
18  
19  
20  
21  
22  
23  
24  
25  
26  
27  
28  
29  
30  
31  
32  
33  
34  
35  
36  
37  
38  
39  
40  
41  
42  
43  
44  
45  
46

For peer review only

| Characteristics               | 1990                                             |                                         | 2019                                             |                                         | 1990-2019             |
|-------------------------------|--------------------------------------------------|-----------------------------------------|--------------------------------------------------|-----------------------------------------|-----------------------|
|                               | Prevalence cases (*10 <sup>6</sup> )<br>(95% UI) | ASPR per 100,000<br>population (95% UI) | Prevalence cases (*10 <sup>6</sup> )<br>(95% UI) | ASPR per 100,000<br>population (95% UI) | EAPC of ASPR (95% CI) |
| Global                        | 341.67 (316.59-366.107.7)                        | 7855.83 (7300.33-8372.66)               | 697.29 (650.05-741080.75)                        | 8596.21 (8015.74-9125.28)               | 0.32 (0.32 to 0.33)   |
| <b>Gender</b>                 |                                                  |                                         |                                                  |                                         |                       |
| Males                         | 153.14 (141.72-164.63)                           | 7349.01 (6823.3-7842.18)                | 314.32 (292.96-334.84)                           | 8109.77 (7572.96-8608.03)               | 0.69 (0.68 to 0.7)    |
| Females                       | 188.52 (174.87-201.34)                           | 8305.89 (7710.48-8854.59)               | 382.98 (356.75-406.65)                           | 9049.82 (8425.02-9616.13)               | 0.69 (0.68 to 0.7)    |
| <b>Sociodemographic index</b> |                                                  |                                         |                                                  |                                         |                       |
| Low                           | 19.74 (18.26-21321.4)                            | 6338.15 (5882.6-6789.29)                | 48.7 (45.05-52510.46)                            | 7057.41 (6568.24-7529.2)                | 0.34 (0.32 to 0.36)   |
| Low-middle                    | 58.61 (54.03-63338.25)                           | 7766.83 (7198.66-8314.67)               | 130.15 (120.81-139501.25)                        | 8579.86 (7996.24-9142.82)               | 0.25 (0.21 to 0.29)   |
| Middle                        | 107.24 (98.79-115911.52)                         | 8440.84 (7808.66-9019.18)               | 239.88 (222.64-256277.84)                        | 9491.19 (8838.42-10086.19)              | 0.48 (0.45 to 0.5)    |
| High-middle                   | 86.19 (79.75-92396.6)                            | 7781.68 (7221.18-8317.69)               | 156.23 (145.42-166645.78)                        | 8350.95 (7763.91-8901.8)                | 0.32 (0.29 to 0.34)   |
| High                          | 69.73 (64.86-74222.57)                           | 7026.65 (6533.72-7475.58)               | 121.95 (114.53-129214.01)                        | 7364.77 (6889.24-7796.06)               | 0.12 (0.09 to 0.14)   |
| <b>21 GBD regions</b>         |                                                  |                                         |                                                  |                                         |                       |
| Central Asia                  | 4.45 (4.11-4803.7)                               | 8137.03 (7524.1-8741.66)                | 8.15 (7.51-8784.58)                              | 9524.26 (8802.23-10175.81)              | 0.59 (0.53 to 0.65)   |

|    |                              |                        |                            |                           |                              |                       |
|----|------------------------------|------------------------|----------------------------|---------------------------|------------------------------|-----------------------|
| 1  |                              |                        |                            |                           |                              |                       |
| 2  |                              |                        |                            |                           |                              |                       |
| 3  |                              |                        |                            |                           |                              |                       |
| 4  |                              |                        |                            |                           |                              |                       |
| 5  |                              |                        |                            |                           |                              |                       |
| 6  | Central Europe               | 9.15 (8.44-9807.35)    | 6605.48 (6109.43-7070.96)  | 13.57 (12.65-14461.73)    | 7564.59 (7024.38-8040.5)     | 0.42 (0.4 to 0.44)    |
| 7  |                              |                        |                            |                           |                              |                       |
| 8  | Eastern Europe               | 24.38 (22.55-26323.67) | 9409.89 (8700.06-10160.11) | 30.13 (27.96-32292.36)    | 10377.83 (9616.95-11142.47)  | 0.39 (0.34 to 0.44)   |
| 9  |                              |                        |                            |                           |                              |                       |
| 10 | Australasia                  | 1.41 (1.33-1487.37)    | 6177.9 (5831.64-6510.55)   | 2.95 (2.77-3128.02)       | 6532.01 (6133.49-6925.11)    | 0.22 (0.2 to 0.23)    |
| 11 |                              |                        |                            |                           |                              |                       |
| 12 | High-income Asia Pacific     | 16.55 (15.42-17679.41) | 8433.41 (7860.45-8971.08)  | 31 (29.12-32934.31)       | 8231.15 (7714.65-8729.32)    | -0.1 (-0.12 to -0.08) |
| 13 |                              |                        |                            |                           |                              |                       |
| 14 | High-income North America    | 26.23 (24.33-28067.57) | 7750.33 (7175.26-8252.76)  | 43.98 (41.11-46803.08)    | 7982.58 (7433.75-8484.6)     | 0.03 (-0.02 to 0.08)  |
| 15 |                              |                        |                            |                           |                              |                       |
| 16 | Southern Latin America       | 2.85 (2.66-3038.14)    | 6199.61 (5786.14-6591)     | 5.72 (5.38-6077.58)       | 7174.32 (6750.95-7629.01)    | 0.54 (0.49 to 0.59)   |
| 17 |                              |                        |                            |                           |                              |                       |
| 18 | Western Europe               | 29.05 (27.04-30993.2)  | 5488.94 (5116.7-5832.82)   | 45.44 (42.65-48233.7)     | 5690.53 (5326.14-6020.93)    | 0.08 (0.06 to 0.1)    |
| 19 |                              |                        |                            |                           |                              |                       |
| 20 | Andean Latin America         | 1.76 (1.52-2061.21)    | 7004.76 (6076.38-8070.59)  | 5.32 (4.71-6069.48)       | 9101.2 (8067.32-10290.91)    | 0.93 (0.91 to 0.94)   |
| 21 |                              |                        |                            |                           |                              |                       |
| 22 | Caribbean                    | 1.97 (1.84-2108.93)    | 6840.61 (6371.07-7299.12)  | 4.29 (4.03-4568.68)       | 8457.06 (7927.23-8994.33)    | 0.74 (0.7 to 0.78)    |
| 23 |                              |                        |                            |                           |                              |                       |
| 24 | Central Latin America        | 10.31 (9.55-11027.08)  | 9865 (9168.77-10521.68)    | 29.53 (27.68-31265.59)    | 12139.27 (11377.05-12843.88) | 0.68 (0.64 to 0.71)   |
| 25 |                              |                        |                            |                           |                              |                       |
| 26 | Tropical Latin America       | 7.08 (6.58-7550.26)    | 6482.97 (6054.23-6886)     | 17.9 (16.76-18992.36)     | 7399.15 (6923.65-7835.63)    | 0.42 (0.39 to 0.45)   |
| 27 |                              |                        |                            |                           |                              |                       |
| 28 | North Africa and Middle East | 15.77 (14.73-16764.82) | 7697.07 (7182.72-8168.78)  | 49.8 (46.52-52818.54)     | 10589.67 (9930.4-11229.54)   | 1.17 (1.13 to 1.22)   |
| 29 |                              |                        |                            |                           |                              |                       |
| 30 | South Asia                   | 60.22 (55.46-65289.02) | 8186.89 (7582.95-8782.32)  | 139.51 (128.99-150327.5)  | 8847.66 (8206.45-9453.58)    | 0.11 (0.03 to 0.18)   |
| 31 |                              |                        |                            |                           |                              |                       |
| 32 | East Asia                    | 82.94 (76.25-90185.75) | 7989.69 (7377.2-8599.68)   | 156.84 (144.51-169062.38) | 8180.65 (7568.21-8798.3)     | 0.29 (0.2 to 0.37)    |
| 33 |                              |                        |                            |                           |                              |                       |
| 34 | Oceania                      | 0.36 (0.33-391.33)     | 8440.17 (7784.51-9111.81)  | 0.9 (0.82-974.96)         | 9296.4 (8596.13-9971.06)     | 0.3 (0.29 to 0.31)    |
| 35 |                              |                        |                            |                           |                              |                       |
| 36 |                              |                        |                            |                           |                              |                       |
| 37 |                              |                        |                            |                           |                              |                       |
| 38 |                              |                        |                            |                           |                              |                       |
| 39 |                              |                        |                            |                           |                              |                       |
| 40 |                              |                        |                            |                           |                              |                       |
| 41 |                              |                        |                            |                           |                              |                       |
| 42 |                              |                        |                            |                           |                              |                       |
| 43 |                              |                        |                            |                           |                              |                       |
| 44 |                              |                        |                            |                           |                              |                       |
| 45 |                              |                        |                            |                           |                              |                       |
| 46 |                              |                        |                            |                           |                              |                       |

1  
2  
3  
4  
5  
6  
7  
8  
9  
10  
11  
12  
13  
14  
15  
16  
17  
18  
19  
20  
21  
22  
23  
24  
25  
26  
27  
28  
29  
30  
31  
32  
33  
34  
35  
36  
37  
38  
39  
40  
41  
42  
43  
44  
45  
46

|                             |                        |                            |                        |                             |                     |
|-----------------------------|------------------------|----------------------------|------------------------|-----------------------------|---------------------|
| Southeast Asia              | 31.01 (28.51-33656.96) | 9351.48 (8661.82-10057.66) | 71.14 (65.94-76348.22) | 10803.4 (10057.32-11534.34) | 0.5 (0.49 to 0.52)  |
| Central Sub-Saharan Africa  | 1.69 (1.55-1841.1)     | 5306.9 (4899.19-5732.96)   | 4.52 (4.16-4907.57)    | 5867.73 (5434.29-6284.81)   | 0.36 (0.32 to 0.39) |
| Eastern Sub-Saharan Africa  | 5.54 (5.12-5997.22)    | 5254.32 (4862.09-5638.51)  | 13.92 (12.84-15065.98) | 5800.09 (5395.2-6210.24)    | 0.36 (0.33 to 0.38) |
| Southern Sub-Saharan Africa | 2.3 (2.13-2464.83)     | 6633.49 (6172.65-7075.02)  | 5.02 (4.66-5366.22)    | 7769.91 (7260.61-8261.86)   | 0.53 (0.45 to 0.61) |
| Western Sub-Saharan Africa  | 6.64 (6.16-7139.44)    | 5768.63 (5363.39-6151.96)  | 17.67 (16.4-18953.01)  | 6678.91 (6225.96-7102.83)   | 0.56 (0.52 to 0.59) |

1  
2  
3  
4  
5 **Supplemental table 2. Incidence cases and age-standardized incidence rate (ASIR) of chronic kidney disease in 1990 and 2019, and the temporal trends from**  
6 **1990 to 2019 in global and regions.**  
7  
8  
9  
10  
11  
12  
13  
14  
15  
16  
17  
18  
19  
20  
21  
22  
23  
24  
25  
26  
27  
28  
29  
30  
31  
32  
33  
34  
35  
36  
37  
38  
39  
40  
41  
42  
43  
44  
45  
46

For peer review only



| Characteristics               | 1990                                            |                                         | 2019                                            |                                         | 1990-2019             |
|-------------------------------|-------------------------------------------------|-----------------------------------------|-------------------------------------------------|-----------------------------------------|-----------------------|
|                               | Incidence cases (*10 <sup>6</sup> )<br>(95% UI) | ASIR per 100,000<br>population (95% UI) | Incidence cases (*10 <sup>6</sup> )<br>(95% UI) | ASIR per 100,000<br>population (95% UI) | EAPC of ASIR (95% CI) |
| Global                        | 7.8 (7.17-8485.39)                              | 192.45 (177.31-209.05)                  | 18.99 (17.56-20518.16)                          | 233.65 (216.56-252.31)                  | 0.69 (0.68 to 0.7)    |
| <b>Gender</b>                 |                                                 |                                         |                                                 |                                         |                       |
| Males                         | 3.36 (3.09-3.65)                                | 179.21 (164.8-194.74)                   | 8.51 (7.84-9.23)                                | 223.02 (206.07-241.18)                  | 0.69 (0.68 to 0.7)    |
| Females                       | 4.44 (4.08-4.84)                                | 203.64 (187.5-221.38)                   | 10.47 (9.7-11.32)                               | 243.63 (225.94-262.66)                  | 0.69 (0.68 to 0.7)    |
| <b>Sociodemographic index</b> |                                                 |                                         |                                                 |                                         |                       |
| Low                           | 0.37 (0.34-398.17)                              | 123.72 (114.25-133.97)                  | 1.01 (0.93-1085.2)                              | 161.24 (148.07-175.64)                  | 0.95 (0.92 to 0.99)   |
| Low-middle                    | 1.05 (0.97-1139.39)                             | 149.68 (137.38-162.87)                  | 2.81 (2.58-3056.52)                             | 197.07 (181.51-214.36)                  | 0.91 (0.87 to 0.95)   |
| Middle                        | 1.95 (1.79-2127.2)                              | 172.4 (157.74-188.79)                   | 5.87 (5.4-6373.37)                              | 235.71 (218.23-254.87)                  | 1.17 (1.14 to 1.2)    |
| High-middle                   | 1.78 (1.63-1952.09)                             | 168.37 (154.83-183.45)                  | 4.13 (3.8-4493.35)                              | 210.65 (194.34-228.37)                  | 0.89 (0.86 to 0.92)   |
| High                          | 2.64 (2.41-2883.51)                             | 252.66 (232.46-274.36)                  | 5.15 (4.75-5569.87)                             | 281.67 (260.21-303.81)                  | 0.28 (0.24 to 0.32)   |
| <b>21 GBD regions</b>         |                                                 |                                         |                                                 |                                         |                       |
| Central Asia                  | 0.07 (0.06-75.25)                               | 123.99 (113.45-135.88)                  | 0.16 (0.15-178.53)                              | 193.3 (176.73-211.27)                   | 1.69 (1.52 to 1.87)   |

|    |                              |                     |                        |                     |                        |                      |
|----|------------------------------|---------------------|------------------------|---------------------|------------------------|----------------------|
| 1  |                              |                     |                        |                     |                        |                      |
| 2  |                              |                     |                        |                     |                        |                      |
| 3  |                              |                     |                        |                     |                        |                      |
| 4  |                              |                     |                        |                     |                        |                      |
| 5  |                              |                     |                        |                     |                        |                      |
| 6  | Central Europe               | 0.21 (0.19-229.95)  | 144.36 (131.43-158.87) | 0.44 (0.4-481.17)   | 216.5 (197.99-236.75)  | 1.21 (1.12 to 1.3)   |
| 7  |                              |                     |                        |                     |                        |                      |
| 8  | Eastern Europe               | 0.34 (0.3-370.22)   | 130.48 (119.44-142.71) | 0.54 (0.49-599.18)  | 181.85 (166.07-199.03) | 1.32 (1.15 to 1.49)  |
| 9  |                              |                     |                        |                     |                        |                      |
| 10 | Australasia                  | 0.06 (0.06-65.23)   | 254.5 (240.37-269.78)  | 0.14 (0.13-153.73)  | 286.14 (264.78-308.93) | 0.37 (0.33 to 0.41)  |
| 11 |                              |                     |                        |                     |                        |                      |
| 12 | High-income Asia Pacific     | 0.53 (0.49-577.29)  | 265.13 (244.47-287.79) | 1.21 (1.11-1315.46) | 277.51 (255.67-300.82) | 0.08 (0.04 to 0.13)  |
| 13 |                              |                     |                        |                     |                        |                      |
| 14 | High-income North America    | 1.04 (0.94-1140.52) | 295.47 (270.34-323.33) | 1.89 (1.73-2062.59) | 310.44 (284.74-336.3)  | 0.03 (-0.05 to 0.12) |
| 15 |                              |                     |                        |                     |                        |                      |
| 16 | Southern Latin America       | 0.1 (0.09-106.64)   | 211.66 (193.13-230.93) | 0.23 (0.22-253.7)   | 282.02 (260.12-304.6)  | 1.02 (0.93 to 1.1)   |
| 17 |                              |                     |                        |                     |                        |                      |
| 18 | Western Europe               | 1.28 (1.16-1410.45) | 216.75 (198.62-236.36) | 2.16 (1.99-2344.51) | 235.6 (216.93-254.91)  | 0.25 (0.2 to 0.3)    |
| 19 |                              |                     |                        |                     |                        |                      |
| 20 | Andean Latin America         | 0.04 (0.03-38.3)    | 154.8 (142.57-167.62)  | 0.16 (0.15-175.89)  | 288.34 (264.91-311.21) | 2.2 (2.09 to 2.3)    |
| 21 |                              |                     |                        |                     |                        |                      |
| 22 | Caribbean                    | 0.04 (0.04-48.74)   | 161.46 (148.31-176.22) | 0.13 (0.12-141.71)  | 256.39 (237.73-277)    | 1.58 (1.48 to 1.68)  |
| 23 |                              |                     |                        |                     |                        |                      |
| 24 | Central Latin America        | 0.27 (0.25-292.01)  | 276.65 (252.64-304.54) | 0.99 (0.93-1060.8)  | 409.61 (383.06-437.91) | 1.29 (1.21 to 1.36)  |
| 25 |                              |                     |                        |                     |                        |                      |
| 26 | Tropical Latin America       | 0.19 (0.18-210.14)  | 191.28 (176.52-209.33) | 0.6 (0.56-655.92)   | 250.85 (233.24-272.18) | 0.89 (0.82 to 0.96)  |
| 27 |                              |                     |                        |                     |                        |                      |
| 28 | North Africa and Middle East | 0.51 (0.47-550.25)  | 261.9 (240.97-285.91)  | 2.03 (1.88-2202.72) | 447.48 (415.13-482.83) | 1.97 (1.87 to 2.08)  |
| 29 |                              |                     |                        |                     |                        |                      |
| 30 | South Asia                   | 1.01 (0.93-1104.53) | 148.9 (136.4-162.57)   | 2.67 (2.43-2918.85) | 181.87 (165.91-198.75) | 0.61 (0.54 to 0.68)  |
| 31 |                              |                     |                        |                     |                        |                      |
| 32 | East Asia                    | 1.33 (1.21-1465.64) | 148.49 (135.05-163.27) | 3.27 (2.98-3599.05) | 164.52 (150.62-179.18) | 0.61 (0.51 to 0.7)   |
| 33 |                              |                     |                        |                     |                        |                      |
| 34 | Oceania                      | 0 (0-5.25)          | 122.53 (112.38-133.56) | 0.01 (0.01-14.89)   | 158.68 (145.3-172.89)  | 0.79 (0.74 to 0.84)  |
| 35 |                              |                     |                        |                     |                        |                      |
| 36 |                              |                     |                        |                     |                        |                      |
| 37 |                              |                     |                        |                     |                        |                      |
| 38 |                              |                     |                        |                     |                        |                      |
| 39 |                              |                     |                        |                     |                        |                      |
| 40 |                              |                     |                        |                     |                        |                      |
| 41 |                              |                     |                        |                     |                        |                      |
| 42 |                              |                     |                        |                     |                        |                      |
| 43 |                              |                     |                        |                     |                        |                      |
| 44 |                              |                     |                        |                     |                        |                      |
| 45 |                              |                     |                        |                     |                        |                      |
| 46 |                              |                     |                        |                     |                        |                      |

1  
2  
3  
4  
5  
6  
7  
8  
9  
10  
11  
12  
13  
14  
15  
16  
17  
18  
19  
20  
21  
22  
23  
24  
25  
26  
27  
28  
29  
30  
31  
32  
33  
34  
35  
36  
37  
38  
39  
40  
41  
42  
43  
44  
45  
46

|                             |                    |                        |                     |                        |                     |
|-----------------------------|--------------------|------------------------|---------------------|------------------------|---------------------|
| Southeast Asia              | 0.45 (0.42-491.19) | 152.65 (140.55-165.93) | 1.43 (1.31-1547.89) | 227.98 (210.24-246.38) | 1.4 (1.37 to 1.44)  |
| Central Sub-Saharan Africa  | 0.03 (0.03-30.16)  | 93.07 (86.17-100.24)   | 0.08 (0.08-89.02)   | 125.99 (115.7-136.67)  | 1.11 (1.01 to 1.2)  |
| Eastern Sub-Saharan Africa  | 0.09 (0.09-99.99)  | 94.39 (87.18-102.21)   | 0.24 (0.22-258.06)  | 119.54 (109.76-130.11) | 0.86 (0.78 to 0.93) |
| Southern Sub-Saharan Africa | 0.05 (0.05-57.56)  | 168.63 (154.1-184.7)   | 0.14 (0.13-149.6)   | 231.14 (212.43-251.73) | 1.04 (0.85 to 1.23) |
| Western Sub-Saharan Africa  | 0.16 (0.15-168.99) | 137.2 (126.96-148.29)  | 0.44 (0.41-470.76)  | 181.8 (167.29-197.54)  | 1.13 (1.01 to 1.24) |

1  
2  
3  
4  
5 **Supplemental table 3. DALYs and age-standardized DALYs rate (ASR-DALYs) of chronic kidney disease in 1990 and 2019, and the temporal trends from**  
6 **1990 to 2019 in global and regions.**  
7  
8  
9  
10  
11  
12  
13  
14  
15  
16  
17  
18  
19  
20  
21  
22  
23  
24  
25  
26  
27  
28  
29  
30  
31  
32  
33  
34  
35  
36  
37  
38  
39  
40  
41  
42  
43  
44  
45  
46

For peer review only

| Characteristics               | 1990                               |                                           | 2019                               |                                           | 1990-2019                  |
|-------------------------------|------------------------------------|-------------------------------------------|------------------------------------|-------------------------------------------|----------------------------|
|                               | DALYs (*10 <sup>6</sup> ) (95% UI) | ASR-DALYs per 100,000 population (95% UI) | DALYs (*10 <sup>6</sup> ) (95% UI) | ASR-DALYs per 100,000 population (95% UI) | EAPC of ASR-DALYs (95% CI) |
| Global                        | 21.5 (20.04-23065.78)              | 484.46 (452.28-518.67)                    | 41.54 (38.29-45037.86)             | 514.86 (474.91-558.86)                    | 0.31 (0.23 to 0.38)        |
| <b>Gender</b>                 |                                    |                                           |                                    |                                           |                            |
| Males                         | 11.2 (10.4-12.15)                  | 537.61 (499.52-580.01)                    | 21.98 (20.14-23.97)                | 574.23 (527.52-625.27)                    | 0.35 (0.27 to 0.43)        |
| Females                       | 10.3 (9.46-11.22)                  | 443.69 (409.36-481.56)                    | 19.56 (17.7-21.47)                 | 463.61 (419.34-509.95)                    | 0.21 (0.15 to 0.28)        |
| <b>Sociodemographic index</b> |                                    |                                           |                                    |                                           |                            |
| Low                           | 2.45 (2.18-2728.52)                | 734.23 (667.32-804.58)                    | 4.73 (4.21-5276.93)                | 682.18 (615.56-752.04)                    | -0.24 (-0.28 to -0.21)     |
| Low-middle                    | 5.05 (4.56-5598.22)                | 649.9 (591.82-714.59)                     | 9.91 (8.98-10820.22)               | 664.18 (603.21-723.92)                    | 0.1 (0 to 0.21)            |
| Middle                        | 7.55 (7.02-8112.98)                | 601.87 (560.14-645.51)                    | 15.44 (14.17-16837.37)             | 621.93 (570.74-676.64)                    | 0.27 (0.21 to 0.33)        |
| High-middle                   | 3.89 (3.6-4213.22)                 | 360.16 (332.75-390.43)                    | 6.05 (5.49-6665.14)                | 320.68 (290.18-353.73)                    | -0.36 (-0.46 to -0.27)     |
| High                          | 2.54 (2.33-2787.23)                | 254.32 (232.26-279.43)                    | 5.38 (4.87-5884.31)                | 304.13 (274.09-335.44)                    | 0.8 (0.72 to 0.89)         |
| <b>21 GBD regions</b>         |                                    |                                           |                                    |                                           |                            |
| Central Asia                  | 0.23 (0.22-256.33)                 | 397.89 (367.64-442.65)                    | 0.43 (0.39-481.73)                 | 506.72 (456.51-562.2)                     | 0.48 (0.16 to 0.79)        |

|    |                              |                     |                        |                     |                           |                        |
|----|------------------------------|---------------------|------------------------|---------------------|---------------------------|------------------------|
| 1  |                              |                     |                        |                     |                           |                        |
| 2  |                              |                     |                        |                     |                           |                        |
| 3  |                              |                     |                        |                     |                           |                        |
| 4  |                              |                     |                        |                     |                           |                        |
| 5  |                              |                     |                        |                     |                           |                        |
| 6  | Central Europe               | 0.41 (0.38-437.53)  | 297.3 (278.39-317.88)  | 0.46 (0.4-523.54)   | 243.84 (212.01-278.04)    | -0.62 (-0.69 to -0.55) |
| 7  |                              |                     |                        |                     |                           |                        |
| 8  | Eastern Europe               | 0.49 (0.45-547.25)  | 197 (177.48-218.85)    | 0.56 (0.49-638.34)  | 196.77 (170.51-224.02)    | -0.51 (-0.73 to -0.28) |
| 9  |                              |                     |                        |                     |                           |                        |
| 10 | Australasia                  | 0.04 (0.04-48.98)   | 196.75 (180.03-215.38) | 0.1 (0.09-115.71)   | 214.3 (191.2-238.39)      | 0.45 (0.4 to 0.5)      |
| 11 |                              |                     |                        |                     |                           |                        |
| 12 | High-income Asia Pacific     | 0.59 (0.55-642.57)  | 310.61 (285.7-334.9)   | 0.96 (0.84-1067.61) | 218.58 (192.71-243.9)     | -1.16 (-1.21 to -1.1)  |
| 13 |                              |                     |                        |                     |                           |                        |
| 14 | High-income North America    | 0.93 (0.85-1032.34) | 273.54 (247.51-303.34) | 2.42 (2.22-2641.09) | 413.63 (379.73-450.68)    | 1.69 (1.51 to 1.88)    |
| 15 |                              |                     |                        |                     |                           |                        |
| 16 | Southern Latin America       | 0.23 (0.22-245.13)  | 501.82 (472.93-530.86) | 0.44 (0.41-472.11)  | 540.08 (500.88-579.63)    | 0.25 (0.02 to 0.48)    |
| 17 |                              |                     |                        |                     |                           |                        |
| 18 | Western Europe               | 1.08 (0.99-1188.03) | 197.18 (179.66-216.97) | 1.75 (1.56-1921.1)  | 186.58 (166.88-208.38)    | -0.04 (-0.09 to 0.02)  |
| 19 |                              |                     |                        |                     |                           |                        |
| 20 | Andean Latin America         | 0.18 (0.17-196.15)  | 680.42 (626.59-742.08) | 0.48 (0.4-564.87)   | 836.34 (704.25-981.59)    | 0.84 (0.59 to 1.1)     |
| 21 |                              |                     |                        |                     |                           |                        |
| 22 | Caribbean                    | 0.17 (0.16-189.99)  | 587 (541.65-647.03)    | 0.39 (0.34-454.01)  | 774.89 (668-896.08)       | 1.32 (1.22 to 1.42)    |
| 23 |                              |                     |                        |                     |                           |                        |
| 24 | Central Latin America        | 0.78 (0.72-840.29)  | 739.23 (689.04-794.6)  | 3.28 (2.92-3697.82) | 1348.14 (1203.58-1521.61) | 2.3 (2.01 to 2.59)     |
| 25 |                              |                     |                        |                     |                           |                        |
| 26 | Tropical Latin America       | 0.61 (0.58-650.99)  | 559.23 (528.14-592.5)  | 1.24 (1.15-1332.95) | 513.36 (476.05-553.4)     | -0.37 (-0.46 to -0.29) |
| 27 |                              |                     |                        |                     |                           |                        |
| 28 | North Africa and Middle East | 1.77 (1.62-1930.04) | 834.93 (762.27-947.15) | 3.38 (2.92-3897.91) | 744.36 (646.14-851.75)    | -0.37 (-0.43 to -0.31) |
| 29 |                              |                     |                        |                     |                           |                        |
| 30 | South Asia                   | 4.69 (4.05-5324.9)  | 647.1 (557.75-731.83)  | 9.89 (8.8-11052.83) | 640.65 (568.76-715.48)    | -0.06 (-0.24 to 0.11)  |
| 31 |                              |                     |                        |                     |                           |                        |
| 32 | East Asia                    | 4.2 (3.73-4664.95)  | 416.47 (371.77-461.55) | 6.21 (5.36-7049.94) | 320.44 (277.88-362.19)    | -0.58 (-0.68 to -0.48) |
| 33 |                              |                     |                        |                     |                           |                        |
| 34 | Oceania                      | 0.03 (0.02-32.15)   | 664.24 (581.19-758.07) | 0.07 (0.06-83.48)   | 747.22 (629.25-880.16)    | 0.27 (0.09 to 0.44)    |
| 35 |                              |                     |                        |                     |                           |                        |
| 36 |                              |                     |                        |                     |                           |                        |
| 37 |                              |                     |                        |                     |                           |                        |
| 38 |                              |                     |                        |                     |                           |                        |
| 39 |                              |                     |                        |                     |                           |                        |
| 40 |                              |                     |                        |                     |                           |                        |
| 41 |                              |                     |                        |                     |                           |                        |
| 42 |                              |                     |                        |                     |                           |                        |
| 43 |                              |                     |                        |                     |                           |                        |
| 44 |                              |                     |                        |                     |                           |                        |
| 45 |                              |                     |                        |                     |                           |                        |
| 46 |                              |                     |                        |                     |                           |                        |

1  
2  
3  
4  
5  
6  
7  
8  
9  
10  
11  
12  
13  
14  
15  
16  
17  
18  
19  
20  
21  
22  
23  
24  
25  
26  
27  
28  
29  
30  
31  
32  
33  
34  
35  
36  
37  
38  
39  
40  
41  
42  
43  
44  
45  
46

|                             |                     |                        |                     |                        |                        |
|-----------------------------|---------------------|------------------------|---------------------|------------------------|------------------------|
| Southeast Asia              | 2.7 (2.49-2945.17)  | 806.56 (741.95-875.79) | 5.11 (4.61-5673.54) | 796.69 (720.03-881.21) | -0.02 (-0.07 to 0.03)  |
| Central Sub-Saharan Africa  | 0.26 (0.22-303.29)  | 769.07 (656.59-891.05) | 0.46 (0.37-563.41)  | 635.98 (510.34-766.78) | -0.73 (-0.77 to -0.7)  |
| Eastern Sub-Saharan Africa  | 0.84 (0.71-949.63)  | 752.43 (668.49-837.88) | 1.4 (1.21-1581.03)  | 626.45 (557.9-698.14)  | -0.73 (-0.77 to -0.69) |
| Southern Sub-Saharan Africa | 0.22 (0.2-249.55)   | 636.93 (576.23-723.35) | 0.5 (0.45-545.96)   | 803.81 (733.62-878.51) | 0.94 (0.63 to 1.25)    |
| Western Sub-Saharan Africa  | 1.03 (0.87-1218.24) | 813.99 (702.78-957.03) | 2.01 (1.67-2371.3)  | 738.79 (627.78-857.08) | -0.27 (-0.3 to -0.23)  |

**Supplemental table 4. Deaths and age-standardized death rate (ASDR) of chronic kidney disease in 1990 and 2019, and the temporal trends from 1990 to 2019 in 204 countries.**

| location            | Death cases in 1990 (*10 <sup>3</sup> ) | ASDR in 1990 (per 100,000 population) | Death cases in 2019 (*10 <sup>3</sup> ) | ASDR in 2019 (per 100,000 population) | EAPC of ASDR from 1990 to 2019 |
|---------------------|-----------------------------------------|---------------------------------------|-----------------------------------------|---------------------------------------|--------------------------------|
| Afghanistan         | 3.71 (2.82-5.06)                        | 55.94 (42.01-81.56)                   | 5.64 (4.33-7.92)                        | 49.37 (37.14-74.78)                   | -0.33 (-0.37 to -0.28)         |
| Albania             | 0.24 (0.22-0.26)                        | 11.53 (10.65-12.4)                    | 0.33 (0.25-0.42)                        | 8.24 (6.22-10.66)                     | -1.1 (-1.34 to -0.86)          |
| Algeria             | 3.56 (2.74-4.96)                        | 38.73 (30.35-52.07)                   | 8.2 (6.35-10.89)                        | 31.57 (24.78-41.16)                   | -0.5 (-0.67 to -0.33)          |
| American Samoa      | 0.01 (0.01-0.01)                        | 40.55 (34.26-46.31)                   | 0.03 (0.02-0.03)                        | 59.34 (51.03-69)                      | 1.41 (1.28 to 1.55)            |
| Andorra             | 0 (0-0.01)                              | 11.21 (8.79-14.36)                    | 0.02 (0.01-0.02)                        | 9.86 (7.46-12.24)                     | -0.39 (-0.57 to -0.2)          |
| Angola              | 1.06 (0.76-1.34)                        | 27.03 (19.77-33.28)                   | 2.46 (1.73-3.16)                        | 24.77 (17.36-31.37)                   | -0.37 (-0.42 to -0.33)         |
| Antigua and Barbuda | 0.01 (0.01-0.02)                        | 26.3 (23.81-28.66)                    | 0.04 (0.03-0.04)                        | 39.05 (33.55-45.31)                   | 1.69 (1.48 to 1.91)            |
| Argentina           | 7.13 (6.72-7.54)                        | 23.49 (22.02-24.9)                    | 15.66 (14.21-17.05)                     | 28.36 (25.83-30.9)                    | 0.57 (0.27 to 0.88)            |
| Armenia             | 0.07 (0.06-0.07)                        | 3.03 (2.76-3.3)                       | 0.45 (0.38-0.52)                        | 11.35 (9.53-13.22)                    | 4.65 (4.33 to 4.97)            |
| Australia           | 1.71 (1.56-1.83)                        | 9.49 (8.57-10.15)                     | 5.21 (4.29-5.89)                        | 10.75 (9.03-12.08)                    | 0.62 (0.51 to 0.74)            |



|    |                                  |                  |                     |                     |                     |                        |
|----|----------------------------------|------------------|---------------------|---------------------|---------------------|------------------------|
| 1  |                                  |                  |                     |                     |                     |                        |
| 2  |                                  |                  |                     |                     |                     |                        |
| 3  |                                  |                  |                     |                     |                     |                        |
| 4  |                                  |                  |                     |                     |                     |                        |
| 5  | Austria                          | 0.74 (0.68-0.79) | 6.13 (5.62-6.53)    | 3.37 (2.86-3.73)    | 14.87 (12.79-16.36) | 4.46 (3.94 to 4.98)    |
| 6  |                                  |                  |                     |                     |                     |                        |
| 7  |                                  |                  |                     |                     |                     |                        |
| 8  | Azerbaijan                       | 0.53 (0.47-0.59) | 9.6 (8.55-10.9)     | 1.39 (1.16-1.63)    | 17.85 (14.56-20.65) | 2.69 (2.23 to 3.16)    |
| 9  |                                  |                  |                     |                     |                     |                        |
| 10 | Bahamas                          | 0.04 (0.03-0.04) | 24.48 (22.11-26.99) | 0.11 (0.09-0.14)    | 30.35 (24.98-36.57) | 1.14 (0.98 to 1.3)     |
| 11 |                                  |                  |                     |                     |                     |                        |
| 12 |                                  |                  |                     |                     |                     |                        |
| 13 | Bahrain                          | 0.04 (0.04-0.05) | 38.45 (31.97-46.81) | 0.18 (0.14-0.22)    | 34.82 (27.94-42.19) | -0.09 (-0.63 to 0.45)  |
| 14 |                                  |                  |                     |                     |                     |                        |
| 15 |                                  |                  |                     |                     |                     |                        |
| 16 | Bangladesh                       | 7.7 (5.05-9.75)  | 13.66 (10.12-16.55) | 12.78 (10.18-15.68) | 10.9 (8.74-13.31)   | -0.56 (-0.91 to -0.2)  |
| 17 |                                  |                  |                     |                     |                     |                        |
| 18 | Barbados                         | 0.05 (0.05-0.06) | 18.45 (17.07-19.95) | 0.12 (0.1-0.14)     | 25.66 (21.37-30.06) | 1.14 (0.93 to 1.35)    |
| 19 |                                  |                  |                     |                     |                     |                        |
| 20 |                                  |                  |                     |                     |                     |                        |
| 21 | Belarus                          | 0.28 (0.26-0.29) | 2.32 (2.15-2.46)    | 0.5 (0.4-0.62)      | 3.2 (2.57-3.97)     | 1.48 (0.93 to 2.04)    |
| 22 |                                  |                  |                     |                     |                     |                        |
| 23 | Belgium                          | 1.42 (1.3-1.53)  | 9.13 (8.31-9.81)    | 2.96 (2.5-3.34)     | 9.89 (8.49-11.03)   | 0.38 (0.28 to 0.48)    |
| 24 |                                  |                  |                     |                     |                     |                        |
| 25 |                                  |                  |                     |                     |                     |                        |
| 26 | Belize                           | 0.02 (0.02-0.02) | 22.74 (20.41-25.07) | 0.11 (0.1-0.13)     | 40.49 (35.02-46.66) | 2.2 (1.72 to 2.69)     |
| 27 |                                  |                  |                     |                     |                     |                        |
| 28 |                                  |                  |                     |                     |                     |                        |
| 29 | Benin                            | 0.75 (0.64-0.87) | 35.15 (30.27-40.77) | 1.58 (1.19-2.06)    | 32.41 (25.19-40.64) | -0.15 (-0.23 to -0.07) |
| 30 |                                  |                  |                     |                     |                     |                        |
| 31 | Bermuda                          | 0.01 (0.01-0.01) | 16.94 (15.52-18.34) | 0.02 (0.02-0.02)    | 14.55 (12.11-17.38) | -0.18 (-0.35 to -0.01) |
| 32 |                                  |                  |                     |                     |                     |                        |
| 33 |                                  |                  |                     |                     |                     |                        |
| 34 | Bhutan                           | 0.06 (0.04-0.08) | 22.36 (14.86-31.31) | 0.15 (0.1-0.19)     | 28.1 (20.41-35.31)  | 0.86 (0.81 to 0.91)    |
| 35 |                                  |                  |                     |                     |                     |                        |
| 36 | Bolivia (Plurinational State of) | 1.23 (1.02-1.52) | 39.15 (32.12-49.14) | 4.42 (3.41-5.56)    | 55.89 (43.24-69.91) | 1.3 (1.23 to 1.38)     |
| 37 |                                  |                  |                     |                     |                     |                        |
| 38 |                                  |                  |                     |                     |                     |                        |
| 39 |                                  |                  |                     |                     |                     |                        |
| 40 |                                  |                  |                     |                     |                     |                        |
| 41 |                                  |                  |                     |                     |                     |                        |
| 42 |                                  |                  |                     |                     |                     |                        |
| 43 |                                  |                  |                     |                     |                     |                        |
| 44 |                                  |                  |                     |                     |                     |                        |
| 45 |                                  |                  |                     |                     |                     |                        |
| 46 |                                  |                  |                     |                     |                     |                        |

|    |                          |                    |                     |                     |                     |                        |
|----|--------------------------|--------------------|---------------------|---------------------|---------------------|------------------------|
| 1  |                          |                    |                     |                     |                     |                        |
| 2  |                          |                    |                     |                     |                     |                        |
| 3  |                          |                    |                     |                     |                     |                        |
| 4  |                          |                    |                     |                     |                     |                        |
| 5  | Bosnia and Herzegovina   | 0.34 (0.32-0.36)   | 9.3 (8.68-9.91)     | 0.66 (0.53-0.8)     | 11.56 (9.29-14.09)  | 0.8 (0.55 to 1.05)     |
| 6  |                          |                    |                     |                     |                     |                        |
| 7  |                          |                    |                     |                     |                     |                        |
| 8  | Botswana                 | 0.14 (0.1-0.19)    | 27.26 (20.38-37.49) | 0.44 (0.31-0.61)    | 37.05 (26.41-49.7)  | 0.64 (0.29 to 0.99)    |
| 9  |                          |                    |                     |                     |                     |                        |
| 10 | Brazil                   | 16.25 (15.53-16.8) | 19.48 (18.27-20.26) | 42.34 (38.66-44.67) | 18.6 (16.9-19.66)   | -0.09 (-0.17 to -0.02) |
| 11 |                          |                    |                     |                     |                     |                        |
| 12 |                          |                    |                     |                     |                     |                        |
| 13 | Brunei Darussalam        | 0.03 (0.03-0.03)   | 36.65 (32.22-41.02) | 0.08 (0.07-0.09)    | 37 (32.83-41.35)    | 0.74 (0.49 to 0.99)    |
| 14 |                          |                    |                     |                     |                     |                        |
| 15 | Bulgaria                 | 0.75 (0.7-0.79)    | 6.89 (6.49-7.29)    | 1.95 (1.58-2.38)    | 14.23 (11.57-17.43) | 2.68 (2.32 to 3.05)    |
| 16 |                          |                    |                     |                     |                     |                        |
| 17 |                          |                    |                     |                     |                     |                        |
| 18 | Burkina Faso             | 1.25 (1.03-1.48)   | 30.19 (25.23-35.72) | 2.82 (2.28-3.4)     | 30.98 (25.71-36.7)  | 0.03 (-0.07 to 0.13)   |
| 19 |                          |                    |                     |                     |                     |                        |
| 20 |                          |                    |                     |                     |                     |                        |
| 21 | Burundi                  | 0.74 (0.58-0.94)   | 31.09 (24.22-39.09) | 1.04 (0.81-1.33)    | 25.11 (19.84-31.23) | -1 (-1.1 to -0.9)      |
| 22 |                          |                    |                     |                     |                     |                        |
| 23 | Cabo Verde               | 0.04 (0.03-0.04)   | 15.38 (13.65-18.09) | 0.1 (0.09-0.12)     | 24.42 (21.5-27.42)  | 0.8 (0.48 to 1.12)     |
| 24 |                          |                    |                     |                     |                     |                        |
| 25 |                          |                    |                     |                     |                     |                        |
| 26 | Cambodia                 | 1.17 (0.97-1.38)   | 23.11 (19.27-27.26) | 2.19 (1.77-2.6)     | 19.77 (16.16-22.88) | -0.64 (-0.73 to -0.56) |
| 27 |                          |                    |                     |                     |                     |                        |
| 28 |                          |                    |                     |                     |                     |                        |
| 29 | Cameroon                 | 1.93 (1.49-2.38)   | 46.32 (35.64-56.56) | 4.78 (3.53-6.3)     | 42.01 (31.74-53.82) | -0.29 (-0.36 to -0.22) |
| 30 |                          |                    |                     |                     |                     |                        |
| 31 | Canada                   | 2.64 (2.38-2.83)   | 8.44 (7.58-9.05)    | 7.5 (6.43-8.41)     | 9.67 (8.4-10.78)    | 0.22 (0.1 to 0.34)     |
| 32 |                          |                    |                     |                     |                     |                        |
| 33 |                          |                    |                     |                     |                     |                        |
| 34 | Central African Republic | 0.36 (0.27-0.45)   | 31.47 (23.87-38.91) | 0.65 (0.48-0.86)    | 31.44 (23.07-40.76) | 0.05 (-0.07 to 0.16)   |
| 35 |                          |                    |                     |                     |                     |                        |
| 36 | Chad                     | 0.92 (0.71-1.28)   | 31.71 (24.21-44.14) | 1.82 (1.36-2.4)     | 31.47 (24.21-40.94) | 0.04 (-0.05 to 0.14)   |
| 37 |                          |                    |                     |                     |                     |                        |
| 38 |                          |                    |                     |                     |                     |                        |
| 39 |                          |                    |                     |                     |                     |                        |
| 40 |                          |                    |                     |                     |                     |                        |
| 41 |                          |                    |                     |                     |                     |                        |
| 42 |                          |                    |                     |                     |                     |                        |
| 43 |                          |                    |                     |                     |                     |                        |
| 44 |                          |                    |                     |                     |                     |                        |
| 45 |                          |                    |                     |                     |                     |                        |
| 46 |                          |                    |                     |                     |                     |                        |

1  
2  
3  
4  
5  
6  
7  
8  
9  
10  
11  
12  
13  
14  
15  
16  
17  
18  
19  
20  
21  
22  
23  
24  
25  
26  
27  
28  
29  
30  
31  
32  
33  
34  
35  
36  
37  
38  
39  
40  
41  
42  
43  
44  
45  
46

|                                       |                     |                     |                        |                     |                        |
|---------------------------------------|---------------------|---------------------|------------------------|---------------------|------------------------|
| Chile                                 | 1.35 (1.28-1.42)    | 15.12 (14.14-15.91) | 5.04 (4.47-5.49)       | 21.2 (18.81-23.09)  | 1.54 (1.18 to 1.91)    |
| China                                 | 98.61 (86.8-111.08) | 12.98 (11.52-14.53) | 196.73 (168.24-224.68) | 11.23 (9.63-12.77)  | -0.21 (-0.32 to -0.09) |
| Colombia                              | 3.56 (3.35-3.74)    | 21.24 (19.51-22.52) | 9.5 (7.33-11.97)       | 17.48 (13.59-22.1)  | -0.65 (-0.81 to -0.5)  |
| Comoros                               | 0.06 (0.04-0.08)    | 28.88 (19.76-36.55) | 0.12 (0.1-0.14)        | 26.32 (22.01-31.51) | -0.51 (-0.64 to -0.38) |
| Congo                                 | 0.37 (0.26-0.46)    | 36.99 (26.02-46.61) | 0.7 (0.48-0.92)        | 31.9 (21.82-40.63)  | -0.68 (-0.79 to -0.56) |
| Cook Islands                          | 0 (0-0)             | 23.6 (19.81-27.56)  | 0.01 (0.01-0.01)       | 29.72 (24.86-35)    | 0.99 (0.9 to 1.07)     |
| Costa Rica                            | 0.26 (0.24-0.27)    | 14.97 (13.7-16.1)   | 1.37 (1.08-1.71)       | 26.61 (20.83-33.09) | 1.89 (1.41 to 2.37)    |
| Croatia                               | 0.43 (0.39-0.46)    | 7.27 (6.69-7.85)    | 0.92 (0.74-1.14)       | 9.7 (7.84-11.9)     | 0.93 (0.56 to 1.3)     |
| Cuba                                  | 0.82 (0.77-0.86)    | 7.98 (7.53-8.38)    | 2.73 (2.24-3.32)       | 14.43 (11.8-17.53)  | 2.61 (2.35 to 2.86)    |
| Cyprus                                | 0.18 (0.16-0.21)    | 33.7 (29.01-39.16)  | 0.33 (0.29-0.38)       | 20.62 (17.88-23.26) | -2.01 (-2.19 to -1.83) |
| Czechia                               | 1.08 (1.03-1.13)    | 8.09 (7.7-8.44)     | 1.32 (1.07-1.56)       | 6 (4.88-7.14)       | -0.94 (-1.08 to -0.8)  |
| Democratic People's Republic of Korea | 2.38 (1.86-2.97)    | 15.72 (12.48-19.16) | 4.32 (3.51-5.28)       | 14.24 (11.58-17.26) | -0.28 (-0.41 to -0.14) |
| Democratic Republic of the Congo      | 4.42 (3.69-5.24)    | 30.47 (25.83-35.58) | 8.03 (6.4-9.93)        | 24.79 (19.49-30.7)  | -0.81 (-0.85 to -0.77) |

|    |                    |                  |                     |                     |                     |                       |
|----|--------------------|------------------|---------------------|---------------------|---------------------|-----------------------|
| 1  |                    |                  |                     |                     |                     |                       |
| 2  |                    |                  |                     |                     |                     |                       |
| 3  |                    |                  |                     |                     |                     |                       |
| 4  |                    |                  |                     |                     |                     |                       |
| 5  | Denmark            | 0.37 (0.34-0.4)  | 4.43 (4.05-4.75)    | 1.13 (0.98-1.26)    | 8.8 (7.65-9.71)     | 2.37 (1.93 to 2.8)    |
| 6  |                    |                  |                     |                     |                     |                       |
| 7  |                    |                  |                     |                     |                     |                       |
| 8  | Djibouti           | 0.03 (0.02-0.04) | 23.64 (17.63-30.82) | 0.14 (0.1-0.18)     | 28.41 (22.57-36.87) | 0.58 (0.48 to 0.68)   |
| 9  |                    |                  |                     |                     |                     |                       |
| 10 | Dominica           | 0.03 (0.02-0.03) | 35.66 (32.01-39.51) | 0.04 (0.04-0.05)    | 48.01 (39.68-57.88) | 1.35 (1.23 to 1.47)   |
| 11 |                    |                  |                     |                     |                     |                       |
| 12 |                    |                  |                     |                     |                     |                       |
| 13 | Dominican Republic | 0.58 (0.52-0.65) | 15.07 (13.33-16.88) | 2.28 (1.69-3.04)    | 24.98 (18.71-33.09) | 2.79 (2.47 to 3.12)   |
| 14 |                    |                  |                     |                     |                     |                       |
| 15 | Ecuador            | 1.09 (1.02-1.15) | 20.77 (19.27-22.14) | 6.91 (5.55-8.62)    | 50.48 (40.61-62.49) | 3.43 (2.76 to 4.11)   |
| 16 |                    |                  |                     |                     |                     |                       |
| 17 |                    |                  |                     |                     |                     |                       |
| 18 | Egypt              | 9.72 (6.8-11.83) | 39.39 (27.32-49.32) | 21.98 (12.86-31.56) | 43.93 (26.96-61.79) | 0.54 (0.44 to 0.64)   |
| 19 |                    |                  |                     |                     |                     |                       |
| 20 |                    |                  |                     |                     |                     |                       |
| 21 | El Salvador        | 0.62 (0.58-0.67) | 20.12 (18.68-21.65) | 4.08 (3.09-5.23)    | 67.31 (50.85-86.63) | 4.43 (3.7 to 5.16)    |
| 22 |                    |                  |                     |                     |                     |                       |
| 23 | Equatorial Guinea  | 0.06 (0.04-0.07) | 29.32 (21.77-37.03) | 0.14 (0.1-0.19)     | 32.78 (23.73-43.75) | 0.54 (0.39 to 0.69)   |
| 24 |                    |                  |                     |                     |                     |                       |
| 25 |                    |                  |                     |                     |                     |                       |
| 26 | Eritrea            | 0.25 (0.17-0.34) | 24.73 (15.94-35.35) | 0.66 (0.45-0.92)    | 27.87 (19.48-38.08) | 0.3 (0.14 to 0.46)    |
| 27 |                    |                  |                     |                     |                     |                       |
| 28 |                    |                  |                     |                     |                     |                       |
| 29 | Estonia            | 0.05 (0.05-0.06) | 2.72 (2.52-2.94)    | 0.35 (0.28-0.43)    | 11.33 (9.07-13.93)  | 5.36 (4.91 to 5.81)   |
| 30 |                    |                  |                     |                     |                     |                       |
| 31 | Eswatini           | 0.1 (0.08-0.13)  | 37.13 (29.77-45.05) | 0.27 (0.19-0.36)    | 51.29 (37.88-66.11) | 1.28 (0.67 to 1.89)   |
| 32 |                    |                  |                     |                     |                     |                       |
| 33 |                    |                  |                     |                     |                     |                       |
| 34 | Ethiopia           | 7.86 (6.41-9.38) | 39.59 (32.49-46.12) | 9.86 (8.58-11.29)   | 26.17 (22.48-30.08) | -1.62 (-1.7 to -1.55) |
| 35 |                    |                  |                     |                     |                     |                       |
| 36 | Fiji               | 0.12 (0.09-0.14) | 34.34 (28.19-43.41) | 0.29 (0.23-0.37)    | 46.74 (37.81-57.1)  | 0.55 (0.17 to 0.93)   |
| 37 |                    |                  |                     |                     |                     |                       |
| 38 |                    |                  |                     |                     |                     |                       |
| 39 |                    |                  |                     |                     |                     |                       |
| 40 |                    |                  |                     |                     |                     |                       |
| 41 |                    |                  |                     |                     |                     |                       |
| 42 |                    |                  |                     |                     |                     |                       |
| 43 |                    |                  |                     |                     |                     |                       |
| 44 |                    |                  |                     |                     |                     |                       |
| 45 |                    |                  |                     |                     |                     |                       |
| 46 |                    |                  |                     |                     |                     |                       |

|    |           |                  |                     |                     |                     |                        |
|----|-----------|------------------|---------------------|---------------------|---------------------|------------------------|
| 1  |           |                  |                     |                     |                     |                        |
| 2  |           |                  |                     |                     |                     |                        |
| 3  |           |                  |                     |                     |                     |                        |
| 4  |           |                  |                     |                     |                     |                        |
| 5  | Finland   | 0.21 (0.2-0.23)  | 3.08 (2.8-3.3)      | 0.71 (0.59-0.79)    | 4.69 (4.01-5.26)    | 2.13 (1.9 to 2.37)     |
| 6  |           |                  |                     |                     |                     |                        |
| 7  |           |                  |                     |                     |                     |                        |
| 8  | France    | 7.12 (6.35-7.72) | 7.99 (7.12-8.64)    | 12.7 (10.29-14.62)  | 6.59 (5.48-7.46)    | -0.39 (-0.52 to -0.26) |
| 9  |           |                  |                     |                     |                     |                        |
| 10 | Gabon     | 0.18 (0.13-0.23) | 35.51 (25.47-44.37) | 0.37 (0.23-0.48)    | 41.2 (25.46-53.69)  | 0.46 (0.25 to 0.67)    |
| 11 |           |                  |                     |                     |                     |                        |
| 12 |           |                  |                     |                     |                     |                        |
| 13 | Gambia    | 0.11 (0.08-0.14) | 31.8 (25.23-39.71)  | 0.31 (0.24-0.39)    | 33.3 (27.05-40.97)  | 0.1 (-0.01 to 0.22)    |
| 14 |           |                  |                     |                     |                     |                        |
| 15 | Georgia   | 0.35 (0.31-0.39) | 6.2 (5.54-6.88)     | 0.71 (0.59-0.82)    | 11.89 (9.98-13.83)  | 3.59 (2.83 to 4.35)    |
| 16 |           |                  |                     |                     |                     |                        |
| 17 |           |                  |                     |                     |                     |                        |
| 18 | Germany   | 9.35 (8.69-9.9)  | 7.04 (6.55-7.43)    | 35.22 (30.38-39.03) | 14.7 (12.69-16.19)  | 3.54 (3.2 to 3.89)     |
| 19 |           |                  |                     |                     |                     |                        |
| 20 |           |                  |                     |                     |                     |                        |
| 21 | Ghana     | 1.66 (1.25-2.22) | 27.97 (21.27-36.97) | 4.68 (3.38-5.96)    | 31.79 (23.14-39.85) | 0.55 (0.44 to 0.66)    |
| 22 |           |                  |                     |                     |                     |                        |
| 23 | Greece    | 2.95 (2.71-3.17) | 20.63 (18.81-22.08) | 4.6 (4.02-5.09)     | 14.96 (13.36-16.41) | -1.62 (-2.08 to -1.16) |
| 24 |           |                  |                     |                     |                     |                        |
| 25 |           |                  |                     |                     |                     |                        |
| 26 | Greenland | 0 (0-0)          | 13.2 (11.48-15.22)  | 0.01 (0.01-0.01)    | 13.87 (11.51-16.31) | 0.22 (0.11 to 0.34)    |
| 27 |           |                  |                     |                     |                     |                        |
| 28 | Grenada   | 0.03 (0.02-0.03) | 34.89 (31.52-38.34) | 0.05 (0.04-0.06)    | 47.49 (41.83-52.74) | 1.47 (1.3 to 1.64)     |
| 29 |           |                  |                     |                     |                     |                        |
| 30 |           |                  |                     |                     |                     |                        |
| 31 | Guam      | 0.01 (0.01-0.02) | 24.88 (21.94-27.8)  | 0.06 (0.05-0.07)    | 29.97 (25.2-35.61)  | 0.9 (0.61 to 1.19)     |
| 32 |           |                  |                     |                     |                     |                        |
| 33 |           |                  |                     |                     |                     |                        |
| 34 | Guatemala | 1.14 (1.02-1.27) | 32.23 (28.9-35.79)  | 6.02 (4.81-7.5)     | 57.06 (46.4-70.3)   | 2.65 (2.29 to 3.01)    |
| 35 |           |                  |                     |                     |                     |                        |
| 36 | Guinea    | 1.25 (1.01-1.59) | 37.28 (30.01-47.69) | 1.93 (1.51-2.42)    | 34.24 (27.19-42.48) | -0.1 (-0.17 to -0.02)  |
| 37 |           |                  |                     |                     |                     |                        |
| 38 |           |                  |                     |                     |                     |                        |
| 39 |           |                  |                     |                     |                     |                        |
| 40 |           |                  |                     |                     |                     |                        |
| 41 |           |                  |                     |                     |                     |                        |
| 42 |           |                  |                     |                     |                     |                        |
| 43 |           |                  |                     |                     |                     |                        |
| 44 |           |                  |                     |                     |                     |                        |
| 45 |           |                  |                     |                     |                     |                        |
| 46 |           |                  |                     |                     |                     |                        |

|    |                            |                      |                     |                        |                     |                        |
|----|----------------------------|----------------------|---------------------|------------------------|---------------------|------------------------|
| 1  |                            |                      |                     |                        |                     |                        |
| 2  |                            |                      |                     |                        |                     |                        |
| 3  |                            |                      |                     |                        |                     |                        |
| 4  |                            |                      |                     |                        |                     |                        |
| 5  | Guinea-Bissau              | 0.21 (0.17-0.27)     | 50.78 (40.95-61.44) | 0.29 (0.23-0.36)       | 40.52 (32.1-49.72)  | -0.74 (-0.78 to -0.7)  |
| 6  |                            |                      |                     |                        |                     |                        |
| 7  |                            |                      |                     |                        |                     |                        |
| 8  | Guyana                     | 0.11 (0.1-0.13)      | 29.17 (25.4-33.04)  | 0.28 (0.22-0.36)       | 47.17 (37.07-58.98) | 2.38 (2.15 to 2.61)    |
| 9  |                            |                      |                     |                        |                     |                        |
| 10 | Haiti                      | 1.18 (0.91-1.64)     | 34.39 (26-50.81)    | 2.37 (1.67-3.61)       | 34.33 (24.49-52.97) | 0.32 (0.18 to 0.47)    |
| 11 |                            |                      |                     |                        |                     |                        |
| 12 |                            |                      |                     |                        |                     |                        |
| 13 | Honduras                   | 0.56 (0.45-0.78)     | 26.05 (20.21-38.44) | 3.16 (2.57-4.03)       | 55.87 (45.6-71.19)  | 3.09 (2.81 to 3.37)    |
| 14 |                            |                      |                     |                        |                     |                        |
| 15 | Hungary                    | 0.78 (0.74-0.82)     | 5.84 (5.51-6.11)    | 1.82 (1.52-2.17)       | 8.92 (7.43-10.6)    | 2.57 (2.18 to 2.97)    |
| 16 |                            |                      |                     |                        |                     |                        |
| 17 |                            |                      |                     |                        |                     |                        |
| 18 | Iceland                    | 0.01 (0.01-0.01)     | 4.19 (3.74-4.58)    | 0.03 (0.03-0.04)       | 4.98 (4.14-5.69)    | 0.89 (0.75 to 1.03)    |
| 19 |                            |                      |                     |                        |                     |                        |
| 20 |                            |                      |                     |                        |                     |                        |
| 21 | India                      | 92.81 (79.36-104.72) | 22.76 (19.35-25.79) | 222.92 (191.55-258.59) | 20.92 (17.98-24.08) | -0.55 (-0.77 to -0.33) |
| 22 |                            |                      |                     |                        |                     |                        |
| 23 | Indonesia                  | 22.38 (20.04-24.93)  | 21.08 (18.79-23.69) | 42.13 (35.88-48.3)     | 20.95 (17.92-23.36) | 0 (-0.13 to 0.12)      |
| 24 |                            |                      |                     |                        |                     |                        |
| 25 |                            |                      |                     |                        |                     |                        |
| 26 | Iran (Islamic Republic of) | 5.27 (4.82-5.77)     | 24.11 (21.79-28.8)  | 12.55 (11.38-13.41)    | 19.77 (17.77-21.21) | -0.89 (-0.98 to -0.79) |
| 27 |                            |                      |                     |                        |                     |                        |
| 28 |                            |                      |                     |                        |                     |                        |
| 29 | Iraq                       | 3.46 (2.82-4.48)     | 46.27 (37.12-61.87) | 7.89 (6.16-10.08)      | 41.86 (33.19-53.49) | -0.42 (-0.48 to -0.35) |
| 30 |                            |                      |                     |                        |                     |                        |
| 31 | Ireland                    | 0.42 (0.39-0.44)     | 10.95 (10.02-11.65) | 0.7 (0.59-0.79)        | 8.89 (7.57-9.94)    | -0.71 (-0.79 to -0.64) |
| 32 |                            |                      |                     |                        |                     |                        |
| 33 |                            |                      |                     |                        |                     |                        |
| 34 | Israel                     | 0.96 (0.88-1.02)     | 21.9 (19.96-23.41)  | 2.76 (2.37-3.06)       | 21.48 (18.66-23.71) | 0.28 (-0.04 to 0.6)    |
| 35 |                            |                      |                     |                        |                     |                        |
| 36 | Italy                      | 8.39 (7.89-8.68)     | 9.78 (9.09-10.16)   | 16.51 (13.88-18.05)    | 8.6 (7.37-9.33)     | -0.17 (-0.31 to -0.04) |
| 37 |                            |                      |                     |                        |                     |                        |
| 38 |                            |                      |                     |                        |                     |                        |
| 39 |                            |                      |                     |                        |                     |                        |
| 40 |                            |                      |                     |                        |                     |                        |
| 41 |                            |                      |                     |                        |                     |                        |
| 42 |                            |                      |                     |                        |                     |                        |
| 43 |                            |                      |                     |                        |                     |                        |
| 44 |                            |                      |                     |                        |                     |                        |
| 45 |                            |                      |                     |                        |                     |                        |
| 46 |                            |                      |                     |                        |                     |                        |

|    |                                  |                     |                     |                     |                     |                        |
|----|----------------------------------|---------------------|---------------------|---------------------|---------------------|------------------------|
| 1  |                                  |                     |                     |                     |                     |                        |
| 2  |                                  |                     |                     |                     |                     |                        |
| 3  |                                  |                     |                     |                     |                     |                        |
| 4  |                                  |                     |                     |                     |                     |                        |
| 5  | Ivory Coast                      | 1.57 (1.27-1.87)    | 40.34 (33.8-47.23)  | 3.43 (2.59-4.33)    | 34.73 (28.03-42.22) | -0.61 (-0.73 to -0.49) |
| 6  |                                  |                     |                     |                     |                     |                        |
| 7  |                                  |                     |                     |                     |                     |                        |
| 8  | Jamaica                          | 0.43 (0.39-0.46)    | 23.34 (21.34-24.93) | 0.94 (0.76-1.15)    | 30.23 (24.24-37.39) | 0.3 (-0.21 to 0.82)    |
| 9  |                                  |                     |                     |                     |                     |                        |
| 10 | Japan                            | 19.48 (17.92-20.33) | 12.85 (11.7-13.48)  | 45.32 (35.35-51.15) | 8.87 (7.24-9.83)    | -1.44 (-1.54 to -1.34) |
| 11 |                                  |                     |                     |                     |                     |                        |
| 12 |                                  |                     |                     |                     |                     |                        |
| 13 | Jordan                           | 0.44 (0.37-0.51)    | 40.92 (34.47-48.38) | 1.81 (1.52-2.15)    | 36.65 (30.74-43.21) | -0.28 (-0.4 to -0.15)  |
| 14 |                                  |                     |                     |                     |                     |                        |
| 15 |                                  |                     |                     |                     |                     |                        |
| 16 | Kazakhstan                       | 0.97 (0.91-1.05)    | 7.34 (6.89-7.89)    | 1.87 (1.64-2.13)    | 11.79 (10.31-13.3)  | 1.12 (0.79 to 1.45)    |
| 17 |                                  |                     |                     |                     |                     |                        |
| 18 | Kenya                            | 1.62 (1.36-1.94)    | 20.91 (17.39-25.31) | 4.76 (3.99-5.64)    | 25.35 (21.47-29.6)  | 0.75 (0.67 to 0.82)    |
| 19 |                                  |                     |                     |                     |                     |                        |
| 20 |                                  |                     |                     |                     |                     |                        |
| 21 | Kiribati                         | 0.02 (0.01-0.02)    | 44.1 (36.16-52.87)  | 0.04 (0.03-0.05)    | 56.87 (43.53-72.81) | 0.6 (0.19 to 1.02)     |
| 22 |                                  |                     |                     |                     |                     |                        |
| 23 |                                  |                     |                     |                     |                     |                        |
| 24 | Kuwait                           | 0.14 (0.12-0.15)    | 27.67 (23.81-30.52) | 0.32 (0.27-0.39)    | 16.18 (13.28-19.5)  | -2.21 (-2.93 to -1.48) |
| 25 |                                  |                     |                     |                     |                     |                        |
| 26 | Kyrgyzstan                       | 0.43 (0.39-0.47)    | 12.46 (11.34-13.65) | 0.49 (0.42-0.56)    | 9.8 (8.54-11.16)    | -1.37 (-1.82 to -0.93) |
| 27 |                                  |                     |                     |                     |                     |                        |
| 28 |                                  |                     |                     |                     |                     |                        |
| 29 | Lao People's Democratic Republic | 1.08 (0.85-1.35)    | 50.84 (39.68-64.92) | 1.71 (1.31-2.18)    | 41.81 (32.97-51.98) | -0.85 (-0.92 to -0.78) |
| 30 |                                  |                     |                     |                     |                     |                        |
| 31 | Latvia                           | 0.08 (0.07-0.08)    | 2.33 (2.17-2.5)     | 0.26 (0.22-0.32)    | 6.22 (5.25-7.5)     | 4.52 (4 to 5.05)       |
| 32 |                                  |                     |                     |                     |                     |                        |
| 33 |                                  |                     |                     |                     |                     |                        |
| 34 | Lebanon                          | 0.62 (0.52-0.75)    | 32.44 (27.01-39.57) | 1.18 (0.85-1.53)    | 23.32 (16.78-30.26) | -1.11 (-1.25 to -0.97) |
| 35 |                                  |                     |                     |                     |                     |                        |
| 36 | Lesotho                          | 0.22 (0.18-0.28)    | 24.49 (20.02-29.91) | 0.56 (0.4-0.73)     | 49.32 (35.95-62.73) | 3.04 (2.73 to 3.35)    |
| 37 |                                  |                     |                     |                     |                     |                        |
| 38 |                                  |                     |                     |                     |                     |                        |
| 39 |                                  |                     |                     |                     |                     |                        |
| 40 |                                  |                     |                     |                     |                     |                        |
| 41 |                                  |                     |                     |                     |                     |                        |
| 42 |                                  |                     |                     |                     |                     |                        |
| 43 |                                  |                     |                     |                     |                     |                        |
| 44 |                                  |                     |                     |                     |                     |                        |
| 45 |                                  |                     |                     |                     |                     |                        |
| 46 |                                  |                     |                     |                     |                     |                        |

|    |                  |                  |                     |                  |                     |                        |
|----|------------------|------------------|---------------------|------------------|---------------------|------------------------|
| 1  |                  |                  |                     |                  |                     |                        |
| 2  |                  |                  |                     |                  |                     |                        |
| 3  |                  |                  |                     |                  |                     |                        |
| 4  |                  |                  |                     |                  |                     |                        |
| 5  | Liberia          | 0.45 (0.37-0.55) | 41.82 (35.14-51.43) | 0.65 (0.47-0.9)  | 33.14 (25.24-45.08) | -0.58 (-0.85 to -0.32) |
| 6  |                  |                  |                     |                  |                     |                        |
| 7  |                  |                  |                     |                  |                     |                        |
| 8  | Libya            | 0.52 (0.4-0.66)  | 29.75 (22.44-39.08) | 1.37 (0.92-1.86) | 30.37 (20.49-41.27) | 0.33 (0.15 to 0.5)     |
| 9  |                  |                  |                     |                  |                     |                        |
| 10 | Lithuania        | 0.12 (0.11-0.12) | 2.66 (2.46-2.84)    | 0.26 (0.22-0.31) | 4.37 (3.64-5.24)    | 1.2 (0.62 to 1.78)     |
| 11 |                  |                  |                     |                  |                     |                        |
| 12 |                  |                  |                     |                  |                     |                        |
| 13 | Luxembourg       | 0.05 (0.05-0.06) | 10.12 (9.11-10.94)  | 0.12 (0.1-0.14)  | 10.19 (8.48-11.88)  | 0.23 (0.02 to 0.44)    |
| 14 |                  |                  |                     |                  |                     |                        |
| 15 | Madagascar       | 1.2 (0.94-1.49)  | 22.91 (17.82-29.06) | 1.94 (1.49-2.54) | 20.34 (15.74-26.54) | -0.49 (-0.56 to -0.42) |
| 16 |                  |                  |                     |                  |                     |                        |
| 17 |                  |                  |                     |                  |                     |                        |
| 18 | Malawi           | 1.04 (0.83-1.21) | 27.48 (23.76-31.57) | 1.78 (1.46-2.15) | 26.24 (21.93-31.13) | -0.28 (-0.42 to -0.14) |
| 19 |                  |                  |                     |                  |                     |                        |
| 20 |                  |                  |                     |                  |                     |                        |
| 21 | Malaysia         | 2.18 (2.01-2.37) | 24.78 (22.57-27.13) | 6.11 (4.87-7.45) | 25.56 (20.44-31)    | -0.47 (-0.73 to -0.22) |
| 22 |                  |                  |                     |                  |                     |                        |
| 23 | Maldives         | 0.04 (0.04-0.05) | 57.41 (49.94-68.83) | 0.09 (0.07-0.1)  | 33.8 (27.82-39.77)  | -2.22 (-2.46 to -1.97) |
| 24 |                  |                  |                     |                  |                     |                        |
| 25 |                  |                  |                     |                  |                     |                        |
| 26 | Mali             | 1.52 (1.21-1.91) | 37.05 (29.91-46.42) | 2.7 (2.07-3.46)  | 31.19 (25-38.82)    | -0.45 (-0.61 to -0.29) |
| 27 |                  |                  |                     |                  |                     |                        |
| 28 | Malta            | 0.05 (0.05-0.06) | 13.49 (12.13-14.67) | 0.11 (0.09-0.12) | 10.34 (8.85-11.81)  | -0.93 (-1.14 to -0.72) |
| 29 |                  |                  |                     |                  |                     |                        |
| 30 |                  |                  |                     |                  |                     |                        |
| 31 | Marshall Islands | 0.01 (0.01-0.01) | 39.58 (31.44-51.85) | 0.02 (0.01-0.02) | 53.39 (39.7-72.05)  | 1.04 (0.78 to 1.3)     |
| 32 |                  |                  |                     |                  |                     |                        |
| 33 |                  |                  |                     |                  |                     |                        |
| 34 | Mauritania       | 0.45 (0.38-0.53) | 47.02 (39-55.12)    | 0.59 (0.44-0.76) | 30.91 (23.68-38.57) | -1.45 (-1.52 to -1.37) |
| 35 |                  |                  |                     |                  |                     |                        |
| 36 | Mauritius        | 0.31 (0.29-0.33) | 44.68 (41.91-47.57) | 1.26 (1.03-1.53) | 75.03 (61.8-90.76)  | 2.09 (1.74 to 2.45)    |
| 37 |                  |                  |                     |                  |                     |                        |
| 38 |                  |                  |                     |                  |                     |                        |
| 39 |                  |                  |                     |                  |                     |                        |
| 40 |                  |                  |                     |                  |                     |                        |
| 41 |                  |                  |                     |                  |                     |                        |
| 42 |                  |                  |                     |                  |                     |                        |
| 43 |                  |                  |                     |                  |                     |                        |
| 44 |                  |                  |                     |                  |                     |                        |
| 45 |                  |                  |                     |                  |                     |                        |
| 46 |                  |                  |                     |                  |                     |                        |



|    |                                  |                     |                     |                    |                     |                        |
|----|----------------------------------|---------------------|---------------------|--------------------|---------------------|------------------------|
| 1  |                                  |                     |                     |                    |                     |                        |
| 2  |                                  |                     |                     |                    |                     |                        |
| 3  |                                  |                     |                     |                    |                     |                        |
| 4  |                                  |                     |                     |                    |                     |                        |
| 5  | Mexico                           | 12.18 (11.63-12.52) | 30.65 (28.76-31.74) | 72.54 (62.59-82.5) | 63.67 (55.02-72.25) | 2.85 (2.43 to 3.27)    |
| 6  |                                  |                     |                     |                    |                     |                        |
| 7  |                                  |                     |                     |                    |                     |                        |
| 8  | Micronesia (Federated States of) | 0.02 (0.02-0.03)    | 49.5 (39.15-64.24)  | 0.05 (0.03-0.06)   | 77.21 (57.56-97.54) | 1.45 (1.05 to 1.84)    |
| 9  |                                  |                     |                     |                    |                     |                        |
| 10 | Monaco                           | 0 (0-0)             | 4.16 (3.41-4.99)    | 0.01 (0.01-0.01)   | 6.28 (5.16-7.39)    | 1.83 (1.41 to 2.26)    |
| 11 |                                  |                     |                     |                    |                     |                        |
| 12 |                                  |                     |                     |                    |                     |                        |
| 13 | Mongolia                         | 0.39 (0.33-0.46)    | 35.49 (30.53-41)    | 0.39 (0.31-0.5)    | 17.81 (14.41-22.12) | -3.6 (-4.07 to -3.12)  |
| 14 |                                  |                     |                     |                    |                     |                        |
| 15 | Montenegro                       | 0.07 (0.07-0.08)    | 12.43 (11.17-13.87) | 0.13 (0.11-0.15)   | 13.82 (11.6-16.13)  | 0.55 (0.38 to 0.72)    |
| 16 |                                  |                     |                     |                    |                     |                        |
| 17 |                                  |                     |                     |                    |                     |                        |
| 18 | Morocco                          | 3.55 (3.03-4.63)    | 29.43 (24.56-41.35) | 9.32 (7.16-11.84)  | 35.84 (27.87-46.25) | 0.76 (0.62 to 0.89)    |
| 19 |                                  |                     |                     |                    |                     |                        |
| 20 | Mozambique                       | 1.24 (1.02-1.52)    | 22.84 (18.92-28.33) | 2.64 (2.08-3.28)   | 25.87 (21.06-32.1)  | 0.5 (0.37 to 0.63)     |
| 21 |                                  |                     |                     |                    |                     |                        |
| 22 |                                  |                     |                     |                    |                     |                        |
| 23 | Myanmar                          | 7.64 (5.94-9.5)     | 30.76 (24.01-38.16) | 11.55 (9.73-13.96) | 26.84 (23.21-32.3)  | -0.53 (-0.65 to -0.41) |
| 24 |                                  |                     |                     |                    |                     |                        |
| 25 |                                  |                     |                     |                    |                     |                        |
| 26 | Namibia                          | 0.18 (0.13-0.24)    | 27.85 (20.88-37.4)  | 0.35 (0.25-0.49)   | 27.4 (20-38.41)     | -0.39 (-0.75 to -0.02) |
| 27 |                                  |                     |                     |                    |                     |                        |
| 28 | Nauru                            | 0 (0-0)             | 49.17 (38.1-60.09)  | 0 (0-0)            | 66.61 (49.13-82.46) | 0.93 (0.61 to 1.25)    |
| 29 |                                  |                     |                     |                    |                     |                        |
| 30 |                                  |                     |                     |                    |                     |                        |
| 31 | Nepal                            | 1.73 (1.27-2.25)    | 18.15 (13.34-24.47) | 5.11 (3.58-6.71)   | 25.06 (17.71-32.79) | 1.23 (0.94 to 1.53)    |
| 32 |                                  |                     |                     |                    |                     |                        |
| 33 |                                  |                     |                     |                    |                     |                        |
| 34 | Netherlands                      | 1.68 (1.48-1.82)    | 8.42 (7.37-9.15)    | 3.78 (3.23-4.22)   | 9.8 (8.42-10.92)    | 0.67 (0.59 to 0.75)    |
| 35 |                                  |                     |                     |                    |                     |                        |
| 36 | New Zealand                      | 0.31 (0.28-0.33)    | 8.26 (7.56-8.83)    | 0.91 (0.79-1)      | 10.82 (9.52-11.82)  | 1.04 (0.82 to 1.27)    |
| 37 |                                  |                     |                     |                    |                     |                        |
| 38 |                                  |                     |                     |                    |                     |                        |
| 39 |                                  |                     |                     |                    |                     |                        |
| 40 |                                  |                     |                     |                    |                     |                        |
| 41 |                                  |                     |                     |                    |                     |                        |
| 42 |                                  |                     |                     |                    |                     |                        |
| 43 |                                  |                     |                     |                    |                     |                        |
| 44 |                                  |                     |                     |                    |                     |                        |
| 45 |                                  |                     |                     |                    |                     |                        |
| 46 |                                  |                     |                     |                    |                     |                        |

|    |                          |                     |                     |                     |                     |                       |
|----|--------------------------|---------------------|---------------------|---------------------|---------------------|-----------------------|
| 1  |                          |                     |                     |                     |                     |                       |
| 2  |                          |                     |                     |                     |                     |                       |
| 3  |                          |                     |                     |                     |                     |                       |
| 4  |                          |                     |                     |                     |                     |                       |
| 5  | Nicaragua                | 0.61 (0.57-0.65)    | 37.62 (34.76-40.75) | 3.48 (2.87-4.09)    | 83.24 (69.57-96.75) | 3.14 (2.79 to 3.49)   |
| 6  |                          |                     |                     |                     |                     |                       |
| 7  |                          |                     |                     |                     |                     |                       |
| 8  | Niger                    | 1.07 (0.84-1.35)    | 35.2 (27.55-44.12)  | 2.2 (1.61-2.91)     | 28.69 (22.39-36.04) | -0.66 (-0.73 to -0.6) |
| 9  |                          |                     |                     |                     |                     |                       |
| 10 | Nigeria                  | 11.66 (9.42-14.85)  | 27.69 (22.51-35.07) | 20.04 (15.89-25.09) | 24.84 (20.27-30.37) | -0.3 (-0.36 to -0.23) |
| 11 |                          |                     |                     |                     |                     |                       |
| 12 |                          |                     |                     |                     |                     |                       |
| 13 | Niue                     | 0 (0-0)             | 35.72 (28.03-44.02) | 0 (0-0)             | 47.39 (34.47-59.33) | 0.85 (0.59 to 1.12)   |
| 14 |                          |                     |                     |                     |                     |                       |
| 15 | North Macedonia          | 0.19 (0.18-0.22)    | 11.25 (10.27-12.72) | 0.36 (0.29-0.45)    | 12.72 (10.34-15.66) | 0.3 (0.07 to 0.54)    |
| 16 |                          |                     |                     |                     |                     |                       |
| 17 |                          |                     |                     |                     |                     |                       |
| 18 | Northern Mariana Islands | 0.01 (0.01-0.01)    | 45.65 (39.08-54.81) | 0.02 (0.02-0.03)    | 56.84 (48.66-65.02) | 0.95 (0.85 to 1.06)   |
| 19 |                          |                     |                     |                     |                     |                       |
| 20 |                          |                     |                     |                     |                     |                       |
| 21 | Norway                   | 0.34 (0.31-0.36)    | 4.55 (4.2-4.77)     | 0.78 (0.67-0.84)    | 6.69 (5.84-7.25)    | 1.49 (1.18 to 1.8)    |
| 22 |                          |                     |                     |                     |                     |                       |
| 23 |                          |                     |                     |                     |                     |                       |
| 24 | Oman                     | 0.08 (0.06-0.11)    | 16.82 (12.93-22.29) | 0.2 (0.17-0.23)     | 19.85 (17.05-22.82) | 0.98 (0.78 to 1.17)   |
| 25 |                          |                     |                     |                     |                     |                       |
| 26 | Pakistan                 | 15.21 (11.34-20.54) | 26.34 (19.51-35.91) | 44.39 (32.45-56.53) | 39.88 (29.74-50.88) | 1.43 (1.17 to 1.7)    |
| 27 |                          |                     |                     |                     |                     |                       |
| 28 |                          |                     |                     |                     |                     |                       |
| 29 | Palau                    | 0.01 (0-0.01)       | 54.63 (45.05-68.31) | 0.01 (0.01-0.02)    | 69.74 (56.33-84.64) | 0.79 (0.59 to 1)      |
| 30 |                          |                     |                     |                     |                     |                       |
| 31 | Palestine                | 0.39 (0.31-0.48)    | 46.81 (37.83-57.37) | 0.65 (0.55-0.75)    | 33.58 (28.52-38.58) | -0.86 (-1.11 to -0.6) |
| 32 |                          |                     |                     |                     |                     |                       |
| 33 |                          |                     |                     |                     |                     |                       |
| 34 | Panama                   | 0.22 (0.2-0.24)     | 14.61 (13.34-15.73) | 1.15 (0.9-1.46)     | 27.39 (21.28-34.63) | 2.25 (1.89 to 2.61)   |
| 35 |                          |                     |                     |                     |                     |                       |
| 36 | Papua New Guinea         | 0.25 (0.2-0.31)     | 12.19 (9.8-14.71)   | 0.74 (0.56-0.95)    | 14.36 (11.09-17.95) | 0.51 (0.36 to 0.65)   |
| 37 |                          |                     |                     |                     |                     |                       |
| 38 |                          |                     |                     |                     |                     |                       |
| 39 |                          |                     |                     |                     |                     |                       |
| 40 |                          |                     |                     |                     |                     |                       |
| 41 |                          |                     |                     |                     |                     |                       |
| 42 |                          |                     |                     |                     |                     |                       |
| 43 |                          |                     |                     |                     |                     |                       |
| 44 |                          |                     |                     |                     |                     |                       |
| 45 |                          |                     |                     |                     |                     |                       |
| 46 |                          |                     |                     |                     |                     |                       |

1  
2  
3  
4  
5  
6  
7  
8  
9  
10  
11  
12  
13  
14  
15  
16  
17  
18  
19  
20  
21  
22  
23  
24  
25  
26  
27  
28  
29  
30  
31  
32  
33  
34  
35  
36  
37  
38  
39  
40  
41  
42  
43  
44  
45  
46

|                       |                    |                     |                     |                     |                        |
|-----------------------|--------------------|---------------------|---------------------|---------------------|------------------------|
| Paraguay              | 0.34 (0.3-0.37)    | 15.41 (13.63-17.13) | 1.88 (1.46-2.4)     | 34.76 (27.05-44.15) | 3.48 (3.24 to 3.71)    |
| Peru                  | 2.92 (2.59-3.3)    | 24.09 (21.15-27.33) | 8.04 (5.92-10.44)   | 24.72 (18.22-32.03) | 0.19 (-0.04 to 0.42)   |
| Philippines           | 10.41 (9.42-11.48) | 38.22 (34.49-42.3)  | 33.36 (27.88-39.55) | 44.7 (37.65-52.35)  | 0.92 (0.66 to 1.18)    |
| Poland                | 4.41 (4.25-4.53)   | 10.66 (10.2-10.95)  | 4.7 (3.97-5.59)     | 6.5 (5.49-7.73)     | -1.96 (-2.39 to -1.53) |
| Portugal              | 1.58 (1.49-1.67)   | 12.57 (11.77-13.3)  | 4.07 (3.45-4.51)    | 13.48 (11.55-14.86) | 0.38 (-0.07 to 0.84)   |
| Puerto Rico           | 0.99 (0.93-1.05)   | 28.44 (26.47-30.11) | 2.06 (1.6-2.59)     | 26.89 (21.12-34.09) | 0.4 (0.08 to 0.72)     |
| Qatar                 | 0.03 (0.02-0.04)   | 48.93 (38.41-84.35) | 0.13 (0.1-0.17)     | 45.88 (37.09-55.98) | 0.07 (-0.19 to 0.33)   |
| Republic of Korea     | 3.12 (2.97-3.33)   | 12.08 (11.28-12.97) | 7.98 (6.93-8.86)    | 9.56 (8.27-10.64)   | -0.56 (-0.65 to -0.47) |
| Republic of Moldova   | 0.1 (0.09-0.11)    | 2.87 (2.67-3.05)    | 0.25 (0.21-0.28)    | 4.46 (3.88-5.03)    | 1.53 (1.2 to 1.85)     |
| Romania               | 2.59 (2.47-2.69)   | 10.43 (9.94-10.84)  | 3.04 (2.55-3.61)    | 7.98 (6.68-9.46)    | -0.52 (-1.04 to 0)     |
| Russian Federation    | 9.02 (8.79-9.32)   | 5.47 (5.29-5.63)    | 11.65 (10.16-13.13) | 5.17 (4.52-5.82)    | -0.89 (-1.21 to -0.57) |
| Rwanda                | 0.93 (0.76-1.1)    | 32.51 (27.17-38.51) | 1.27 (0.99-1.56)    | 24.68 (19.41-29.96) | -1.65 (-1.93 to -1.37) |
| Saint Kitts and Nevis | 0.02 (0.02-0.02)   | 48.81 (44.79-53.28) | 0.03 (0.03-0.04)    | 53.07 (44.4-61.71)  | 0.73 (0.55 to 0.91)    |

|    |                                  |                  |                     |                  |                     |                        |
|----|----------------------------------|------------------|---------------------|------------------|---------------------|------------------------|
| 1  |                                  |                  |                     |                  |                     |                        |
| 2  |                                  |                  |                     |                  |                     |                        |
| 3  |                                  |                  |                     |                  |                     |                        |
| 4  |                                  |                  |                     |                  |                     |                        |
| 5  | Saint Lucia                      | 0.03 (0.02-0.03) | 31.56 (29.14-33.94) | 0.07 (0.06-0.08) | 34.59 (28.97-40.83) | 0.39 (0.16 to 0.62)    |
| 6  |                                  |                  |                     |                  |                     |                        |
| 7  |                                  |                  |                     |                  |                     |                        |
| 8  | Saint Vincent and the Grenadines | 0.02 (0.02-0.02) | 25.51 (23.01-27.92) | 0.05 (0.04-0.05) | 36.54 (31.68-42.06) | 1.55 (1.32 to 1.78)    |
| 9  |                                  |                  |                     |                  |                     |                        |
| 10 | Samoa                            | 0.03 (0.02-0.04) | 37.95 (30.01-47.78) | 0.06 (0.05-0.08) | 44.6 (36.37-54.81)  | 0.47 (0.26 to 0.68)    |
| 11 |                                  |                  |                     |                  |                     |                        |
| 12 |                                  |                  |                     |                  |                     |                        |
| 13 | San Marino                       | 0 (0-0)          | 4.05 (3.41-4.74)    | 0 (0-0.01)       | 5.09 (3.52-6.82)    | 1.51 (1.24 to 1.77)    |
| 14 |                                  |                  |                     |                  |                     |                        |
| 15 | Sao Tome and Principe            | 0.03 (0.02-0.03) | 43.51 (36.27-49.57) | 0.05 (0.04-0.06) | 51.3 (40.4-59.87)   | 0.48 (0.36 to 0.6)     |
| 16 |                                  |                  |                     |                  |                     |                        |
| 17 |                                  |                  |                     |                  |                     |                        |
| 18 | Saudi Arabia                     | 2.48 (1.93-3.1)  | 47.9 (37.69-59.35)  | 6.93 (5.45-8.55) | 52.88 (42.82-63.11) | 0.58 (0.35 to 0.81)    |
| 19 |                                  |                  |                     |                  |                     |                        |
| 20 |                                  |                  |                     |                  |                     |                        |
| 21 | Senegal                          | 1.33 (1.04-1.71) | 41.68 (33.28-53.19) | 2.45 (1.89-3.22) | 34.93 (27.7-45.06)  | -0.54 (-0.67 to -0.42) |
| 22 |                                  |                  |                     |                  |                     |                        |
| 23 | Serbia                           | 1.42 (1.28-1.67) | 14 (12.58-16.3)     | 2.52 (2.05-3)    | 16.34 (13.34-19.38) | 0.83 (0.66 to 1)       |
| 24 |                                  |                  |                     |                  |                     |                        |
| 25 |                                  |                  |                     |                  |                     |                        |
| 26 | Seychelles                       | 0.02 (0.01-0.02) | 29.87 (26.45-33.1)  | 0.04 (0.04-0.05) | 44.43 (38.76-49.83) | 0.9 (0.52 to 1.29)     |
| 27 |                                  |                  |                     |                  |                     |                        |
| 28 | Sierra Leone                     | 0.64 (0.51-0.79) | 32.65 (26.08-39.62) | 1.04 (0.79-1.33) | 28.55 (22.85-35.84) | -0.28 (-0.36 to -0.2)  |
| 29 |                                  |                  |                     |                  |                     |                        |
| 30 |                                  |                  |                     |                  |                     |                        |
| 31 | Singapore                        | 0.31 (0.29-0.33) | 15.54 (14.57-16.4)  | 0.76 (0.66-0.83) | 10.51 (9.09-11.55)  | -0.38 (-0.94 to 0.18)  |
| 32 |                                  |                  |                     |                  |                     |                        |
| 33 |                                  |                  |                     |                  |                     |                        |
| 34 | Slovakia                         | 0.69 (0.64-0.74) | 11.86 (11.06-12.74) | 0.76 (0.6-0.93)  | 8.42 (6.73-10.33)   | -1.05 (-1.13 to -0.96) |
| 35 |                                  |                  |                     |                  |                     |                        |
| 36 | Slovenia                         | 0.15 (0.12-0.19) | 6.5 (5.14-8.02)     | 0.26 (0.2-0.33)  | 4.99 (3.91-6.36)    | -0.16 (-0.44 to 0.13)  |
| 37 |                                  |                  |                     |                  |                     |                        |
| 38 |                                  |                  |                     |                  |                     |                        |
| 39 |                                  |                  |                     |                  |                     |                        |
| 40 |                                  |                  |                     |                  |                     |                        |
| 41 |                                  |                  |                     |                  |                     |                        |
| 42 |                                  |                  |                     |                  |                     |                        |
| 43 |                                  |                  |                     |                  |                     |                        |
| 44 |                                  |                  |                     |                  |                     |                        |
| 45 |                                  |                  |                     |                  |                     |                        |
| 46 |                                  |                  |                     |                  |                     |                        |

1  
2  
3  
4  
5  
6  
7  
8  
9  
10  
11  
12  
13  
14  
15  
16  
17  
18  
19  
20  
21  
22  
23  
24  
25  
26  
27  
28  
29  
30  
31  
32  
33  
34  
35  
36  
37  
38  
39  
40  
41  
42  
43  
44  
45  
46

|                            |                  |                     |                     |                     |                        |
|----------------------------|------------------|---------------------|---------------------|---------------------|------------------------|
| Solomon Islands            | 0.07 (0.05-0.09) | 41.92 (31.97-57.06) | 0.09 (0.07-0.11)    | 25.15 (20.72-29.99) | -1.94 (-2.35 to -1.53) |
| Somalia                    | 0.76 (0.57-0.96) | 31.28 (23.57-39.61) | 1.88 (1.43-2.5)     | 29.63 (22.61-39.38) | -0.06 (-0.11 to -0.01) |
| South Africa               | 4.61 (4.25-5.07) | 22 (20.07-24.29)    | 12.35 (11.41-13.22) | 31.02 (28.44-33.22) | 1.29 (0.9 to 1.68)     |
| South Sudan                | 0.65 (0.48-0.83) | 27.62 (20.27-35.67) | 0.93 (0.69-1.25)    | 27.22 (20.38-35.97) | -0.06 (-0.09 to -0.02) |
| Spain                      | 7.68 (6.91-8.29) | 14.79 (13.28-15.99) | 14.65 (12.08-16.74) | 11.06 (9.33-12.49)  | -0.87 (-0.94 to -0.8)  |
| Sri Lanka                  | 2.49 (2.21-2.74) | 25.27 (22.31-27.99) | 5.56 (4.15-7.26)    | 24.09 (18.08-31.21) | -0.11 (-0.51 to 0.28)  |
| Sudan                      | 2.61 (2.06-3.46) | 28.53 (22.13-40.32) | 4.75 (3.37-7.17)    | 28.39 (20.33-44.3)  | 0.05 (-0.04 to 0.14)   |
| Suriname                   | 0.07 (0.07-0.08) | 28.55 (25.56-30.97) | 0.26 (0.22-0.31)    | 45.34 (37.97-53.46) | 1.67 (1.38 to 1.96)    |
| Sweden                     | 0.65 (0.59-0.69) | 3.93 (3.59-4.17)    | 2 (1.68-2.21)       | 7.5 (6.43-8.23)     | 2.55 (2.42 to 2.67)    |
| Switzerland                | 0.61 (0.54-0.66) | 5.43 (4.84-5.87)    | 2.22 (1.82-2.52)    | 9.49 (7.91-10.75)   | 2.76 (2.5 to 3.03)     |
| Syrian Arab Republic       | 1.95 (1.61-2.37) | 36.99 (30.44-46.13) | 2.66 (2.07-3.42)    | 27.78 (22.07-34.58) | -1.65 (-1.95 to -1.34) |
| Taiwan (Province of China) | 3.33 (3.14-3.53) | 26.1 (24.33-27.84)  | 8.25 (6.51-10.33)   | 20.47 (16.14-25.73) | -0.94 (-1.1 to -0.79)  |
| Tajikistan                 | 0.1 (0.1-0.11)   | 3.18 (2.94-3.47)    | 0.4 (0.33-0.49)     | 9.4 (7.8-11.25)     | 4.07 (3.7 to 4.45)     |

|    |                      |                    |                     |                     |                     |                        |
|----|----------------------|--------------------|---------------------|---------------------|---------------------|------------------------|
| 1  |                      |                    |                     |                     |                     |                        |
| 2  |                      |                    |                     |                     |                     |                        |
| 3  |                      |                    |                     |                     |                     |                        |
| 4  |                      |                    |                     |                     |                     |                        |
| 5  | Thailand             | 9.77 (8.63-11.15)  | 29.2 (25.83-33.3)   | 27.45 (21.01-35.47) | 27.94 (21.36-35.99) | -0.38 (-0.48 to -0.28) |
| 6  |                      |                    |                     |                     |                     |                        |
| 7  |                      |                    |                     |                     |                     |                        |
| 8  | Timor-Leste          | 0.09 (0.07-0.12)   | 31.54 (24.73-42.46) | 0.23 (0.17-0.3)     | 31.3 (24.09-39.75)  | -0.04 (-0.24 to 0.15)  |
| 9  |                      |                    |                     |                     |                     |                        |
| 10 | Togo                 | 0.43 (0.35-0.54)   | 34.23 (28.17-42.73) | 1 (0.79-1.27)       | 30.2 (24.51-37.23)  | -0.43 (-0.47 to -0.39) |
| 11 |                      |                    |                     |                     |                     |                        |
| 12 |                      |                    |                     |                     |                     |                        |
| 13 | Tokelau              | 0 (0-0)            | 32.9 (25.7-42.75)   | 0 (0-0)             | 40.42 (31.37-54.02) | 0.67 (0.44 to 0.9)     |
| 14 |                      |                    |                     |                     |                     |                        |
| 15 | Tonga                | 0.01 (0.01-0.02)   | 28.56 (23.31-37.54) | 0.03 (0.03-0.04)    | 41.51 (33.11-54.56) | 1.25 (0.87 to 1.63)    |
| 16 |                      |                    |                     |                     |                     |                        |
| 17 |                      |                    |                     |                     |                     |                        |
| 18 | Trinidad and Tobago  | 0.18 (0.16-0.19)   | 21.8 (20.39-23.17)  | 0.62 (0.46-0.8)     | 34.37 (25.88-44.38) | 2 (1.76 to 2.25)       |
| 19 |                      |                    |                     |                     |                     |                        |
| 20 |                      |                    |                     |                     |                     |                        |
| 21 | Tunisia              | 1.03 (0.88-1.23)   | 24.28 (20.58-29.37) | 2.63 (1.88-3.49)    | 23.62 (16.87-31.07) | -0.12 (-0.16 to -0.09) |
| 22 |                      |                    |                     |                     |                     |                        |
| 23 | Turkey               | 11.61 (9.54-15.85) | 35.19 (28.26-50.25) | 19.19 (15.49-23.48) | 23.48 (18.99-28.71) | -1.28 (-1.59 to -0.97) |
| 24 |                      |                    |                     |                     |                     |                        |
| 25 |                      |                    |                     |                     |                     |                        |
| 26 | Turkmenistan         | 0.31 (0.29-0.33)   | 13.45 (12.55-14.37) | 0.71 (0.58-0.9)     | 17.38 (14.16-21.64) | 0.34 (0.03 to 0.65)    |
| 27 |                      |                    |                     |                     |                     |                        |
| 28 | Tuvalu               | 0 (0-0)            | 38.58 (30.62-49.14) | 0 (0-0.01)          | 48.67 (35.96-66.59) | 0.78 (0.56 to 0.99)    |
| 29 |                      |                    |                     |                     |                     |                        |
| 30 |                      |                    |                     |                     |                     |                        |
| 31 | Uganda               | 1.55 (1.2-1.94)    | 25.22 (19.55-31.82) | 3.39 (2.62-4.26)    | 25.81 (20.58-31.71) | -0.19 (-0.32 to -0.05) |
| 32 |                      |                    |                     |                     |                     |                        |
| 33 |                      |                    |                     |                     |                     |                        |
| 34 | Ukraine              | 1.41 (1.34-1.47)   | 2.29 (2.15-2.39)    | 2.66 (2.28-3.07)    | 3.86 (3.31-4.47)    | 2.18 (1.89 to 2.47)    |
| 35 |                      |                    |                     |                     |                     |                        |
| 36 | United Arab Emirates | 0.21 (0.16-0.26)   | 61.23 (37.47-75.7)  | 1.43 (0.91-2.26)    | 48.09 (29.07-73.62) | -0.82 (-1.4 to -0.24)  |
| 37 |                      |                    |                     |                     |                     |                        |
| 38 |                      |                    |                     |                     |                     |                        |
| 39 |                      |                    |                     |                     |                     |                        |
| 40 |                      |                    |                     |                     |                     |                        |
| 41 |                      |                    |                     |                     |                     |                        |
| 42 |                      |                    |                     |                     |                     |                        |
| 43 |                      |                    |                     |                     |                     |                        |
| 44 |                      |                    |                     |                     |                     |                        |
| 45 |                      |                    |                     |                     |                     |                        |
| 46 |                      |                    |                     |                     |                     |                        |

1  
2  
3  
4  
5  
6  
7  
8  
9  
10  
11  
12  
13  
14  
15  
16  
17  
18  
19  
20  
21  
22  
23  
24  
25  
26  
27  
28  
29  
30  
31  
32  
33  
34  
35  
36  
37  
38  
39  
40  
41  
42  
43  
44  
45  
46

|                                    |                    |                     |                       |                     |                        |
|------------------------------------|--------------------|---------------------|-----------------------|---------------------|------------------------|
| United Kingdom                     | 4.97 (4.64-5.15)   | 5.41 (5.03-5.63)    | 7.78 (6.85-8.33)      | 5.29 (4.7-5.64)     | 0.38 (0.12 to 0.64)    |
| United Republic of Tanzania        | 2.75 (2.31-3.27)   | 26.7 (22.58-32.2)   | 6.23 (5.26-7.36)      | 27.3 (23.17-31.68)  | 0.13 (0.05 to 0.2)     |
| United States of America           | 33.1 (30.49-34.45) | 9.94 (9.18-10.34)   | 106.95 (95.86-114.38) | 17.77 (16.12-18.91) | 2.43 (2.22 to 2.63)    |
| United States Virgin Islands       | 0.02 (0.01-0.02)   | 21.34 (18.16-24.86) | 0.05 (0.04-0.06)      | 30.18 (25.88-34.3)  | 1.76 (1.53 to 1.99)    |
| Uruguay                            | 0.51 (0.47-0.54)   | 13.21 (12.24-14.02) | 0.99 (0.87-1.09)      | 15.9 (14.15-17.4)   | 0.94 (0.8 to 1.09)     |
| Uzbekistan                         | 1.89 (1.64-2.52)   | 14.76 (12.61-20.49) | 3.97 (3.33-4.67)      | 19.85 (17.05-22.89) | 0.69 (-0.1 to 1.5)     |
| Vanuatu                            | 0.02 (0.01-0.02)   | 26.09 (18.67-35.84) | 0.07 (0.05-0.09)      | 43.38 (32.55-57.97) | 1.91 (1.78 to 2.04)    |
| Venezuela (Bolivarian Republic of) | 1.55 (1.46-1.64)   | 16.19 (15.07-17.25) | 10.41 (7.89-13.43)    | 36.77 (27.88-47.38) | 2.43 (1.94 to 2.92)    |
| Viet Nam                           | 11.03 (8.95-13.56) | 29.05 (23.77-35.4)  | 21.48 (16.68-25.81)   | 26.62 (20.89-31.76) | -0.38 (-0.85 to 0.09)  |
| Yemen                              | 1.15 (0.86-1.54)   | 24.8 (18.61-34.23)  | 2.68 (2.05-3.54)      | 23.19 (18.02-30.53) | -0.26 (-0.33 to -0.18) |
| Zambia                             | 0.95 (0.81-1.11)   | 32.83 (27.31-38.79) | 1.93 (1.55-2.4)       | 30.81 (25.1-37.46)  | -0.48 (-0.66 to -0.3)  |
| Zimbabwe                           | 0.92 (0.7-1.36)    | 25.95 (20.13-37.57) | 2.29 (1.66-3.38)      | 37.07 (27.36-55.38) | 1.55 (1.21 to 1.89)    |

**Supplemental table 5. Death cases ratio between females to males and age-standardized death rate (ASDR) ratio between females to males in 21 geographic regions from 1990 to 2019 in 21 regions.**

| location             | year | Ratio of female to male death cases | Ratio of female ASDR to male ASDR |
|----------------------|------|-------------------------------------|-----------------------------------|
| Andean Latin America | 1990 | 0.942869                            | 0.890741                          |
| Andean Latin America | 1991 | 0.989165                            | 0.932389                          |
| Andean Latin America | 1992 | 1.02563                             | 0.967065                          |
| Andean Latin America | 1993 | 1.016962                            | 0.958297                          |
| Andean Latin America | 1994 | 1.061313                            | 1.001181                          |
| Andean Latin America | 1995 | 1.077537                            | 1.019983                          |
| Andean Latin America | 1996 | 1.032404                            | 0.980159                          |
| Andean Latin America | 1997 | 1.030348                            | 0.978622                          |
| Andean Latin America | 1998 | 1.022574                            | 0.969425                          |
| Andean Latin America | 1999 | 0.992515                            | 0.940177                          |



1  
2  
3  
4  
5  
6  
7  
8  
9  
10  
11  
12  
13  
14  
15  
16  
17  
18  
19  
20  
21  
22  
23  
24  
25  
26  
27  
28  
29  
30  
31  
32  
33  
34  
35  
36  
37  
38  
39  
40  
41  
42  
43  
44  
45  
46

|                      |      |          |          |
|----------------------|------|----------|----------|
| Andean Latin America | 2000 | 0.997206 | 0.943015 |
| Andean Latin America | 2001 | 0.947616 | 0.894712 |
| Andean Latin America | 2002 | 0.990555 | 0.931385 |
| Andean Latin America | 2003 | 1.019051 | 0.956351 |
| Andean Latin America | 2004 | 0.985019 | 0.922183 |
| Andean Latin America | 2005 | 0.978694 | 0.912562 |
| Andean Latin America | 2006 | 0.961884 | 0.892727 |
| Andean Latin America | 2007 | 0.945709 | 0.874394 |
| Andean Latin America | 2008 | 0.952065 | 0.876611 |
| Andean Latin America | 2009 | 0.97062  | 0.890118 |
| Andean Latin America | 2010 | 0.975539 | 0.890804 |
| Andean Latin America | 2011 | 0.970379 | 0.882799 |
| Andean Latin America | 2012 | 1.010809 | 0.91578  |

|                      |      |          |          |
|----------------------|------|----------|----------|
| Andean Latin America | 2013 | 1.013769 | 0.915689 |
| Andean Latin America | 2014 | 1.008176 | 0.908392 |
| Andean Latin America | 2015 | 1.003827 | 0.902681 |
| Andean Latin America | 2016 | 1.013695 | 0.90961  |
| Andean Latin America | 2017 | 1.021095 | 0.915073 |
| Andean Latin America | 2018 | 1.028281 | 0.920944 |
| Andean Latin America | 2019 | 1.042441 | 0.933531 |
| Australasia          | 1990 | 1.256436 | 0.749952 |
| Australasia          | 1991 | 1.251345 | 0.749596 |
| Australasia          | 1992 | 1.221065 | 0.731598 |
| Australasia          | 1993 | 1.197424 | 0.715706 |
| Australasia          | 1994 | 1.184041 | 0.705074 |
| Australasia          | 1995 | 1.189314 | 0.708414 |

1  
2  
3  
4  
5  
6  
7  
8  
9  
10  
11  
12  
13  
14  
15  
16  
17  
18  
19  
20  
21  
22  
23  
24  
25  
26  
27  
28  
29  
30  
31  
32  
33  
34  
35  
36  
37  
38  
39  
40  
41  
42  
43  
44  
45  
46

|             |      |          |          |
|-------------|------|----------|----------|
| Australasia | 1996 | 1.171815 | 0.699034 |
| Australasia | 1997 | 1.154972 | 0.694376 |
| Australasia | 1998 | 1.125176 | 0.679026 |
| Australasia | 1999 | 1.123    | 0.679313 |
| Australasia | 2000 | 1.107004 | 0.67342  |
| Australasia | 2001 | 1.092594 | 0.667626 |
| Australasia | 2002 | 1.09213  | 0.668502 |
| Australasia | 2003 | 1.073556 | 0.660159 |
| Australasia | 2004 | 1.093004 | 0.674235 |
| Australasia | 2005 | 1.109953 | 0.687767 |
| Australasia | 2006 | 1.11501  | 0.694533 |
| Australasia | 2007 | 1.119263 | 0.702944 |
| Australasia | 2008 | 1.12093  | 0.709291 |

|             |      |          |          |
|-------------|------|----------|----------|
| Australasia | 2009 | 1.12578  | 0.717931 |
| Australasia | 2010 | 1.119825 | 0.719347 |
| Australasia | 2011 | 1.110324 | 0.720219 |
| Australasia | 2012 | 1.102299 | 0.723081 |
| Australasia | 2013 | 1.092797 | 0.725804 |
| Australasia | 2014 | 1.087757 | 0.72868  |
| Australasia | 2015 | 1.082458 | 0.732461 |
| Australasia | 2016 | 1.075631 | 0.733734 |
| Australasia | 2017 | 1.056633 | 0.72804  |
| Australasia | 2018 | 1.040454 | 0.72481  |
| Australasia | 2019 | 1.025964 | 0.721186 |
| Caribbean   | 1990 | 0.778203 | 0.705687 |
| Caribbean   | 1991 | 0.789518 | 0.714482 |

1  
2  
3  
4  
5  
6  
7  
8  
9  
10  
11  
12  
13  
14  
15  
16  
17  
18  
19  
20  
21  
22  
23  
24  
25  
26  
27  
28  
29  
30  
31  
32  
33  
34  
35  
36  
37  
38  
39  
40  
41  
42  
43  
44  
45  
46

|           |      |          |          |
|-----------|------|----------|----------|
| Caribbean | 1992 | 0.790374 | 0.71231  |
| Caribbean | 1993 | 0.795133 | 0.714068 |
| Caribbean | 1994 | 0.794694 | 0.711298 |
| Caribbean | 1995 | 0.795712 | 0.709507 |
| Caribbean | 1996 | 0.799616 | 0.710759 |
| Caribbean | 1997 | 0.797003 | 0.706666 |
| Caribbean | 1998 | 0.795225 | 0.702657 |
| Caribbean | 1999 | 0.806613 | 0.710478 |
| Caribbean | 2000 | 0.84186  | 0.739455 |
| Caribbean | 2001 | 0.85681  | 0.751266 |
| Caribbean | 2002 | 0.865068 | 0.757623 |
| Caribbean | 2003 | 0.877107 | 0.766409 |
| Caribbean | 2004 | 0.894996 | 0.780393 |

|           |      |          |          |
|-----------|------|----------|----------|
| Caribbean | 2005 | 0.901407 | 0.785161 |
| Caribbean | 2006 | 0.90325  | 0.786336 |
| Caribbean | 2007 | 0.896328 | 0.779649 |
| Caribbean | 2008 | 0.888385 | 0.771347 |
| Caribbean | 2009 | 0.877739 | 0.760608 |
| Caribbean | 2010 | 0.902529 | 0.780843 |
| Caribbean | 2011 | 0.894764 | 0.774198 |
| Caribbean | 2012 | 0.897262 | 0.776873 |
| Caribbean | 2013 | 0.897109 | 0.776448 |
| Caribbean | 2014 | 0.895273 | 0.774364 |
| Caribbean | 2015 | 0.890096 | 0.769517 |
| Caribbean | 2016 | 0.888374 | 0.767038 |
| Caribbean | 2017 | 0.887092 | 0.764536 |

1  
2  
3  
4  
5  
6  
7  
8  
9  
10  
11  
12  
13  
14  
15  
16  
17  
18  
19  
20  
21  
22  
23  
24  
25  
26  
27  
28  
29  
30  
31  
32  
33  
34  
35  
36  
37  
38  
39  
40  
41  
42  
43  
44  
45  
46

|              |      |          |          |
|--------------|------|----------|----------|
| Caribbean    | 2018 | 0.894349 | 0.768945 |
| Caribbean    | 2019 | 0.900884 | 0.773334 |
| Central Asia | 1990 | 0.993776 | 0.730286 |
| Central Asia | 1991 | 0.991773 | 0.731194 |
| Central Asia | 1992 | 0.989487 | 0.735739 |
| Central Asia | 1993 | 0.982871 | 0.732542 |
| Central Asia | 1994 | 0.967481 | 0.724436 |
| Central Asia | 1995 | 0.953222 | 0.716344 |
| Central Asia | 1996 | 0.932845 | 0.703873 |
| Central Asia | 1997 | 0.939018 | 0.708663 |
| Central Asia | 1998 | 0.942864 | 0.711008 |
| Central Asia | 1999 | 0.93285  | 0.706787 |
| Central Asia | 2000 | 0.914752 | 0.697569 |

|              |      |          |          |
|--------------|------|----------|----------|
| Central Asia | 2001 | 0.90155  | 0.688619 |
| Central Asia | 2002 | 0.889552 | 0.67599  |
| Central Asia | 2003 | 0.880783 | 0.667315 |
| Central Asia | 2004 | 0.876683 | 0.667546 |
| Central Asia | 2005 | 0.878457 | 0.676155 |
| Central Asia | 2006 | 0.867182 | 0.670221 |
| Central Asia | 2007 | 0.861093 | 0.665534 |
| Central Asia | 2008 | 0.858393 | 0.661361 |
| Central Asia | 2009 | 0.865353 | 0.664304 |
| Central Asia | 2010 | 0.870146 | 0.66312  |
| Central Asia | 2011 | 0.864532 | 0.659123 |
| Central Asia | 2012 | 0.866978 | 0.660768 |
| Central Asia | 2013 | 0.863849 | 0.658662 |



1  
2  
3  
4  
5  
6  
7  
8  
9  
10  
11  
12  
13  
14  
15  
16  
17  
18  
19  
20  
21  
22  
23  
24  
25  
26  
27  
28  
29  
30  
31  
32  
33  
34  
35  
36  
37  
38  
39  
40  
41  
42  
43  
44  
45  
46

|                |      |          |          |
|----------------|------|----------|----------|
| Central Asia   | 2014 | 0.851903 | 0.644534 |
| Central Asia   | 2015 | 0.851577 | 0.639005 |
| Central Asia   | 2016 | 0.849903 | 0.637999 |
| Central Asia   | 2017 | 0.850543 | 0.637766 |
| Central Asia   | 2018 | 0.846082 | 0.636936 |
| Central Asia   | 2019 | 0.848602 | 0.64247  |
| Central Europe | 1990 | 0.955491 | 0.661719 |
| Central Europe | 1991 | 0.961364 | 0.663657 |
| Central Europe | 1992 | 0.957234 | 0.658579 |
| Central Europe | 1993 | 0.965166 | 0.660903 |
| Central Europe | 1994 | 0.966613 | 0.660389 |
| Central Europe | 1995 | 0.971466 | 0.661423 |
| Central Europe | 1996 | 0.979487 | 0.662808 |

|                |      |          |          |
|----------------|------|----------|----------|
| Central Europe | 1997 | 0.989711 | 0.667123 |
| Central Europe | 1998 | 0.99268  | 0.662612 |
| Central Europe | 1999 | 1.007421 | 0.665519 |
| Central Europe | 2000 | 1.009404 | 0.66032  |
| Central Europe | 2001 | 1.001136 | 0.650922 |
| Central Europe | 2002 | 0.99002  | 0.639423 |
| Central Europe | 2003 | 0.985822 | 0.633371 |
| Central Europe | 2004 | 0.987337 | 0.630977 |
| Central Europe | 2005 | 0.996463 | 0.635996 |
| Central Europe | 2006 | 1.012738 | 0.645361 |
| Central Europe | 2007 | 1.033613 | 0.65755  |
| Central Europe | 2008 | 1.022364 | 0.649222 |
| Central Europe | 2009 | 1.028734 | 0.651344 |

1  
2  
3  
4  
5  
6  
7  
8  
9  
10  
11  
12  
13  
14  
15  
16  
17  
18  
19  
20  
21  
22  
23  
24  
25  
26  
27  
28  
29  
30  
31  
32  
33  
34  
35  
36  
37  
38  
39  
40  
41  
42  
43  
44  
45  
46

|                       |      |          |          |
|-----------------------|------|----------|----------|
| Central Europe        | 2010 | 1.028359 | 0.649302 |
| Central Europe        | 2011 | 1.026432 | 0.646255 |
| Central Europe        | 2012 | 1.039093 | 0.651483 |
| Central Europe        | 2013 | 1.047601 | 0.653682 |
| Central Europe        | 2014 | 1.058371 | 0.659537 |
| Central Europe        | 2015 | 1.069497 | 0.665303 |
| Central Europe        | 2016 | 1.065577 | 0.663071 |
| Central Europe        | 2017 | 1.059955 | 0.660605 |
| Central Europe        | 2018 | 1.058167 | 0.660511 |
| Central Europe        | 2019 | 1.056385 | 0.660778 |
| Central Latin America | 1990 | 0.977794 | 0.906047 |
| Central Latin America | 1991 | 0.960958 | 0.88965  |
| Central Latin America | 1992 | 0.96836  | 0.891993 |

|                       |      |          |          |
|-----------------------|------|----------|----------|
| Central Latin America | 1993 | 0.96676  | 0.885486 |
| Central Latin America | 1994 | 0.960737 | 0.875372 |
| Central Latin America | 1995 | 0.974102 | 0.885237 |
| Central Latin America | 1996 | 0.980331 | 0.887809 |
| Central Latin America | 1997 | 0.986228 | 0.890212 |
| Central Latin America | 1998 | 0.984161 | 0.884764 |
| Central Latin America | 1999 | 0.993865 | 0.890436 |
| Central Latin America | 2000 | 0.974373 | 0.871688 |
| Central Latin America | 2001 | 0.977773 | 0.871958 |
| Central Latin America | 2002 | 0.955348 | 0.848128 |
| Central Latin America | 2003 | 0.953418 | 0.84444  |
| Central Latin America | 2004 | 0.949965 | 0.839949 |
| Central Latin America | 2005 | 0.94173  | 0.832021 |

1  
2  
3  
4  
5  
6  
7  
8  
9  
10  
11  
12  
13  
14  
15  
16  
17  
18  
19  
20  
21  
22  
23  
24  
25  
26  
27  
28  
29  
30  
31  
32  
33  
34  
35  
36  
37  
38  
39  
40  
41  
42  
43  
44  
45  
46

|                       |      |          |          |
|-----------------------|------|----------|----------|
| Central Latin America | 2006 | 0.929669 | 0.819435 |
| Central Latin America | 2007 | 0.928761 | 0.817536 |
| Central Latin America | 2008 | 0.913732 | 0.801903 |
| Central Latin America | 2009 | 0.918766 | 0.802136 |
| Central Latin America | 2010 | 0.932299 | 0.811422 |
| Central Latin America | 2011 | 0.923423 | 0.801163 |
| Central Latin America | 2012 | 0.916951 | 0.792063 |
| Central Latin America | 2013 | 0.906908 | 0.780367 |
| Central Latin America | 2014 | 0.915868 | 0.78579  |
| Central Latin America | 2015 | 0.904761 | 0.774169 |
| Central Latin America | 2016 | 0.894395 | 0.763281 |
| Central Latin America | 2017 | 0.878355 | 0.747275 |
| Central Latin America | 2018 | 0.879571 | 0.745725 |

|                            |      |          |          |
|----------------------------|------|----------|----------|
| Central Latin America      | 2019 | 0.873385 | 0.737332 |
| Central Sub-Saharan Africa | 1990 | 0.683461 | 0.582902 |
| Central Sub-Saharan Africa | 1991 | 0.694933 | 0.587758 |
| Central Sub-Saharan Africa | 1992 | 0.702424 | 0.589793 |
| Central Sub-Saharan Africa | 1993 | 0.714943 | 0.595657 |
| Central Sub-Saharan Africa | 1994 | 0.724653 | 0.59941  |
| Central Sub-Saharan Africa | 1995 | 0.732751 | 0.601448 |
| Central Sub-Saharan Africa | 1996 | 0.756166 | 0.614733 |
| Central Sub-Saharan Africa | 1997 | 0.757363 | 0.61014  |
| Central Sub-Saharan Africa | 1998 | 0.770799 | 0.615205 |
| Central Sub-Saharan Africa | 1999 | 0.783386 | 0.61934  |
| Central Sub-Saharan Africa | 2000 | 0.797995 | 0.624623 |
| Central Sub-Saharan Africa | 2001 | 0.813766 | 0.632481 |

|                            |      |          |          |
|----------------------------|------|----------|----------|
| Central Sub-Saharan Africa | 2002 | 0.833085 | 0.642304 |
| Central Sub-Saharan Africa | 2003 | 0.848224 | 0.65191  |
| Central Sub-Saharan Africa | 2004 | 0.857761 | 0.656619 |
| Central Sub-Saharan Africa | 2005 | 0.863588 | 0.659505 |
| Central Sub-Saharan Africa | 2006 | 0.861856 | 0.658283 |
| Central Sub-Saharan Africa | 2007 | 0.855563 | 0.655166 |
| Central Sub-Saharan Africa | 2008 | 0.851145 | 0.653598 |
| Central Sub-Saharan Africa | 2009 | 0.845802 | 0.651726 |
| Central Sub-Saharan Africa | 2010 | 0.838533 | 0.647863 |
| Central Sub-Saharan Africa | 2011 | 0.83013  | 0.644303 |
| Central Sub-Saharan Africa | 2012 | 0.823208 | 0.641886 |
| Central Sub-Saharan Africa | 2013 | 0.81738  | 0.640355 |
| Central Sub-Saharan Africa | 2014 | 0.813554 | 0.640249 |

|                            |      |          |          |
|----------------------------|------|----------|----------|
| Central Sub-Saharan Africa | 2015 | 0.81476  | 0.642448 |
| Central Sub-Saharan Africa | 2016 | 0.815014 | 0.646596 |
| Central Sub-Saharan Africa | 2017 | 0.815435 | 0.651542 |
| Central Sub-Saharan Africa | 2018 | 0.813046 | 0.653874 |
| Central Sub-Saharan Africa | 2019 | 0.812155 | 0.657802 |
| East Asia                  | 1990 | 0.978254 | 0.818335 |
| East Asia                  | 1991 | 0.969935 | 0.811948 |
| East Asia                  | 1992 | 0.969225 | 0.811294 |
| East Asia                  | 1993 | 0.975501 | 0.816535 |
| East Asia                  | 1994 | 0.983547 | 0.817634 |
| East Asia                  | 1995 | 0.970594 | 0.806198 |
| East Asia                  | 1996 | 0.968826 | 0.803903 |
| East Asia                  | 1997 | 0.972998 | 0.805497 |



1  
2  
3  
4  
5  
6  
7  
8  
9  
10  
11  
12  
13  
14  
15  
16  
17  
18  
19  
20  
21  
22  
23  
24  
25  
26  
27  
28  
29  
30  
31  
32  
33  
34  
35  
36  
37  
38  
39  
40  
41  
42  
43  
44  
45  
46

|           |      |          |          |
|-----------|------|----------|----------|
| East Asia | 1998 | 0.970348 | 0.796676 |
| East Asia | 1999 | 0.973644 | 0.800535 |
| East Asia | 2000 | 0.973907 | 0.806971 |
| East Asia | 2001 | 0.961738 | 0.796409 |
| East Asia | 2002 | 0.943917 | 0.783934 |
| East Asia | 2003 | 0.933697 | 0.779517 |
| East Asia | 2004 | 0.918842 | 0.76399  |
| East Asia | 2005 | 0.899777 | 0.742355 |
| East Asia | 2006 | 0.909001 | 0.745431 |
| East Asia | 2007 | 0.904869 | 0.737149 |
| East Asia | 2008 | 0.898908 | 0.729162 |
| East Asia | 2009 | 0.893633 | 0.720614 |
| East Asia | 2010 | 0.891647 | 0.714709 |

|                |      |          |          |
|----------------|------|----------|----------|
| East Asia      | 2011 | 0.88997  | 0.706791 |
| East Asia      | 2012 | 0.868837 | 0.683317 |
| East Asia      | 2013 | 0.864019 | 0.674571 |
| East Asia      | 2014 | 0.860397 | 0.670162 |
| East Asia      | 2015 | 0.851087 | 0.659093 |
| East Asia      | 2016 | 0.854883 | 0.658215 |
| East Asia      | 2017 | 0.873032 | 0.671291 |
| East Asia      | 2018 | 0.892832 | 0.68718  |
| East Asia      | 2019 | 0.901698 | 0.691723 |
| Eastern Europe | 1990 | 1.23365  | 0.659579 |
| Eastern Europe | 1991 | 1.234032 | 0.661635 |
| Eastern Europe | 1992 | 1.179967 | 0.645697 |
| Eastern Europe | 1993 | 1.111938 | 0.629129 |

1  
2  
3  
4  
5  
6  
7  
8  
9  
10  
11  
12  
13  
14  
15  
16  
17  
18  
19  
20  
21  
22  
23  
24  
25  
26  
27  
28  
29  
30  
31  
32  
33  
34  
35  
36  
37  
38  
39  
40  
41  
42  
43  
44  
45  
46

|                |      |          |          |
|----------------|------|----------|----------|
| Eastern Europe | 1994 | 1.083014 | 0.624362 |
| Eastern Europe | 1995 | 1.097775 | 0.626929 |
| Eastern Europe | 1996 | 1.136801 | 0.636876 |
| Eastern Europe | 1997 | 1.189719 | 0.652769 |
| Eastern Europe | 1998 | 1.200466 | 0.655556 |
| Eastern Europe | 1999 | 1.165156 | 0.646959 |
| Eastern Europe | 2000 | 1.133588 | 0.634773 |
| Eastern Europe | 2001 | 1.144775 | 0.639602 |
| Eastern Europe | 2002 | 1.145428 | 0.641292 |
| Eastern Europe | 2003 | 1.148307 | 0.645278 |
| Eastern Europe | 2004 | 1.147171 | 0.643072 |
| Eastern Europe | 2005 | 1.129964 | 0.635679 |
| Eastern Europe | 2006 | 1.160568 | 0.640647 |

|                |      |          |          |
|----------------|------|----------|----------|
| Eastern Europe | 2007 | 1.178074 | 0.645161 |
| Eastern Europe | 2008 | 1.173178 | 0.640809 |
| Eastern Europe | 2009 | 1.213267 | 0.652961 |
| Eastern Europe | 2010 | 1.216113 | 0.651057 |
| Eastern Europe | 2011 | 1.24856  | 0.661311 |
| Eastern Europe | 2012 | 1.26107  | 0.663132 |
| Eastern Europe | 2013 | 1.276739 | 0.668352 |
| Eastern Europe | 2014 | 1.282237 | 0.669976 |
| Eastern Europe | 2015 | 1.273576 | 0.668279 |
| Eastern Europe | 2016 | 1.293772 | 0.676652 |
| Eastern Europe | 2017 | 1.330071 | 0.693054 |
| Eastern Europe | 2018 | 1.325354 | 0.691408 |
| Eastern Europe | 2019 | 1.316541 | 0.688636 |

1  
2  
3  
4  
5  
6  
7  
8  
9  
10  
11  
12  
13  
14  
15  
16  
17  
18  
19  
20  
21  
22  
23  
24  
25  
26  
27  
28  
29  
30  
31  
32  
33  
34  
35  
36  
37  
38  
39  
40  
41  
42  
43  
44  
45  
46

|                            |      |          |          |
|----------------------------|------|----------|----------|
| Eastern Sub-Saharan Africa | 1990 | 0.723735 | 0.659766 |
| Eastern Sub-Saharan Africa | 1991 | 0.716556 | 0.652735 |
| Eastern Sub-Saharan Africa | 1992 | 0.71224  | 0.648871 |
| Eastern Sub-Saharan Africa | 1993 | 0.705678 | 0.643593 |
| Eastern Sub-Saharan Africa | 1994 | 0.702762 | 0.640668 |
| Eastern Sub-Saharan Africa | 1995 | 0.698844 | 0.636628 |
| Eastern Sub-Saharan Africa | 1996 | 0.697362 | 0.635147 |
| Eastern Sub-Saharan Africa | 1997 | 0.698754 | 0.636152 |
| Eastern Sub-Saharan Africa | 1998 | 0.702868 | 0.639227 |
| Eastern Sub-Saharan Africa | 1999 | 0.705082 | 0.639977 |
| Eastern Sub-Saharan Africa | 2000 | 0.700715 | 0.635388 |
| Eastern Sub-Saharan Africa | 2001 | 0.699235 | 0.632593 |
| Eastern Sub-Saharan Africa | 2002 | 0.700728 | 0.632842 |

|                            |      |          |          |
|----------------------------|------|----------|----------|
| Eastern Sub-Saharan Africa | 2003 | 0.702876 | 0.634288 |
| Eastern Sub-Saharan Africa | 2004 | 0.704983 | 0.635906 |
| Eastern Sub-Saharan Africa | 2005 | 0.708518 | 0.638477 |
| Eastern Sub-Saharan Africa | 2006 | 0.707323 | 0.63662  |
| Eastern Sub-Saharan Africa | 2007 | 0.705661 | 0.634556 |
| Eastern Sub-Saharan Africa | 2008 | 0.703491 | 0.632789 |
| Eastern Sub-Saharan Africa | 2009 | 0.706474 | 0.635204 |
| Eastern Sub-Saharan Africa | 2010 | 0.711105 | 0.639797 |
| Eastern Sub-Saharan Africa | 2011 | 0.718351 | 0.646421 |
| Eastern Sub-Saharan Africa | 2012 | 0.723635 | 0.651391 |
| Eastern Sub-Saharan Africa | 2013 | 0.730521 | 0.657747 |
| Eastern Sub-Saharan Africa | 2014 | 0.735582 | 0.663012 |
| Eastern Sub-Saharan Africa | 2015 | 0.741687 | 0.668864 |

|                            |      |          |          |
|----------------------------|------|----------|----------|
| Eastern Sub-Saharan Africa | 2016 | 0.745789 | 0.673767 |
| Eastern Sub-Saharan Africa | 2017 | 0.752803 | 0.681804 |
| Eastern Sub-Saharan Africa | 2018 | 0.757852 | 0.687995 |
| Eastern Sub-Saharan Africa | 2019 | 0.762287 | 0.693751 |
| High-income Asia Pacific   | 1990 | 1.039751 | 0.667137 |
| High-income Asia Pacific   | 1991 | 1.043418 | 0.661266 |
| High-income Asia Pacific   | 1992 | 1.054406 | 0.660081 |
| High-income Asia Pacific   | 1993 | 1.065479 | 0.660206 |
| High-income Asia Pacific   | 1994 | 1.074912 | 0.660328 |
| High-income Asia Pacific   | 1995 | 1.08229  | 0.66066  |
| High-income Asia Pacific   | 1996 | 1.099512 | 0.667777 |
| High-income Asia Pacific   | 1997 | 1.103374 | 0.665346 |
| High-income Asia Pacific   | 1998 | 1.090814 | 0.652463 |

|                          |      |          |          |
|--------------------------|------|----------|----------|
| High-income Asia Pacific | 1999 | 1.080631 | 0.640419 |
| High-income Asia Pacific | 2000 | 1.077246 | 0.633324 |
| High-income Asia Pacific | 2001 | 1.078976 | 0.628989 |
| High-income Asia Pacific | 2002 | 1.083506 | 0.625751 |
| High-income Asia Pacific | 2003 | 1.079641 | 0.618161 |
| High-income Asia Pacific | 2004 | 1.086294 | 0.616881 |
| High-income Asia Pacific | 2005 | 1.078453 | 0.606349 |
| High-income Asia Pacific | 2006 | 1.085594 | 0.604766 |
| High-income Asia Pacific | 2007 | 1.076784 | 0.596348 |
| High-income Asia Pacific | 2008 | 1.064816 | 0.586519 |
| High-income Asia Pacific | 2009 | 1.046166 | 0.57464  |
| High-income Asia Pacific | 2010 | 1.038285 | 0.567576 |
| High-income Asia Pacific | 2011 | 1.055017 | 0.574227 |



|                           |      |          |          |
|---------------------------|------|----------|----------|
| High-income Asia Pacific  | 2012 | 1.065024 | 0.578891 |
| High-income Asia Pacific  | 2013 | 1.07446  | 0.584658 |
| High-income Asia Pacific  | 2014 | 1.080257 | 0.589475 |
| High-income Asia Pacific  | 2015 | 1.084531 | 0.590498 |
| High-income Asia Pacific  | 2016 | 1.093062 | 0.595518 |
| High-income Asia Pacific  | 2017 | 1.092684 | 0.597114 |
| High-income Asia Pacific  | 2018 | 1.106932 | 0.607797 |
| High-income Asia Pacific  | 2019 | 1.109359 | 0.612461 |
| High-income North America | 1990 | 1.118132 | 0.672668 |
| High-income North America | 1991 | 1.117006 | 0.672201 |
| High-income North America | 1992 | 1.115077 | 0.671045 |
| High-income North America | 1993 | 1.113464 | 0.670112 |
| High-income North America | 1994 | 1.122594 | 0.675419 |

|                           |      |          |          |
|---------------------------|------|----------|----------|
| High-income North America | 1995 | 1.124872 | 0.677823 |
| High-income North America | 1996 | 1.141051 | 0.688329 |
| High-income North America | 1997 | 1.152169 | 0.697537 |
| High-income North America | 1998 | 1.158742 | 0.704401 |
| High-income North America | 1999 | 1.166107 | 0.713378 |
| High-income North America | 2000 | 1.177151 | 0.724467 |
| High-income North America | 2001 | 1.177024 | 0.729607 |
| High-income North America | 2002 | 1.16057  | 0.723799 |
| High-income North America | 2003 | 1.151264 | 0.723251 |
| High-income North America | 2004 | 1.157041 | 0.731177 |
| High-income North America | 2005 | 1.157996 | 0.736166 |
| High-income North America | 2006 | 1.168287 | 0.747508 |
| High-income North America | 2007 | 1.174861 | 0.756554 |

1  
2  
3  
4  
5  
6  
7  
8  
9  
10  
11  
12  
13  
14  
15  
16  
17  
18  
19  
20  
21  
22  
23  
24  
25  
26  
27  
28  
29  
30  
31  
32  
33  
34  
35  
36  
37  
38  
39  
40  
41  
42  
43  
44  
45  
46

|                              |      |          |          |
|------------------------------|------|----------|----------|
| High-income North America    | 2008 | 1.157709 | 0.751119 |
| High-income North America    | 2009 | 1.138461 | 0.745004 |
| High-income North America    | 2010 | 1.115781 | 0.735584 |
| High-income North America    | 2011 | 1.103844 | 0.734535 |
| High-income North America    | 2012 | 1.083181 | 0.727639 |
| High-income North America    | 2013 | 1.057522 | 0.717919 |
| High-income North America    | 2014 | 1.05067  | 0.720224 |
| High-income North America    | 2015 | 1.041592 | 0.720859 |
| High-income North America    | 2016 | 1.023499 | 0.715467 |
| High-income North America    | 2017 | 1.003664 | 0.707465 |
| High-income North America    | 2018 | 0.977158 | 0.692149 |
| High-income North America    | 2019 | 0.996235 | 0.70587  |
| North Africa and Middle East | 1990 | 0.992053 | 0.929902 |

|                              |      |          |          |
|------------------------------|------|----------|----------|
| North Africa and Middle East | 1991 | 0.999587 | 0.945749 |
| North Africa and Middle East | 1992 | 0.9933   | 0.945798 |
| North Africa and Middle East | 1993 | 0.991348 | 0.94837  |
| North Africa and Middle East | 1994 | 0.994314 | 0.95637  |
| North Africa and Middle East | 1995 | 0.992249 | 0.956899 |
| North Africa and Middle East | 1996 | 0.997432 | 0.963296 |
| North Africa and Middle East | 1997 | 0.988848 | 0.952588 |
| North Africa and Middle East | 1998 | 0.984311 | 0.946822 |
| North Africa and Middle East | 1999 | 0.989991 | 0.956975 |
| North Africa and Middle East | 2000 | 0.99719  | 0.973325 |
| North Africa and Middle East | 2001 | 0.988859 | 0.958619 |
| North Africa and Middle East | 2002 | 0.972092 | 0.932539 |
| North Africa and Middle East | 2003 | 0.965162 | 0.921957 |

1  
2  
3  
4  
5  
6  
7  
8  
9  
10  
11  
12  
13  
14  
15  
16  
17  
18  
19  
20  
21  
22  
23  
24  
25  
26  
27  
28  
29  
30  
31  
32  
33  
34  
35  
36  
37  
38  
39  
40  
41  
42  
43  
44  
45  
46

|                              |      |          |          |
|------------------------------|------|----------|----------|
| North Africa and Middle East | 2004 | 0.972897 | 0.926071 |
| North Africa and Middle East | 2005 | 0.989718 | 0.947247 |
| North Africa and Middle East | 2006 | 1.004557 | 0.974732 |
| North Africa and Middle East | 2007 | 1.01095  | 0.99362  |
| North Africa and Middle East | 2008 | 1.017714 | 1.012304 |
| North Africa and Middle East | 2009 | 1.015727 | 1.017749 |
| North Africa and Middle East | 2010 | 1.014014 | 1.01966  |
| North Africa and Middle East | 2011 | 1.001629 | 1.011346 |
| North Africa and Middle East | 2012 | 1.002972 | 1.013633 |
| North Africa and Middle East | 2013 | 0.984389 | 0.993935 |
| North Africa and Middle East | 2014 | 0.990925 | 1.001141 |
| North Africa and Middle East | 2015 | 1.002549 | 1.012016 |
| North Africa and Middle East | 2016 | 1.010398 | 1.021392 |

|                              |      |          |          |
|------------------------------|------|----------|----------|
| North Africa and Middle East | 2017 | 1.014892 | 1.02737  |
| North Africa and Middle East | 2018 | 1.018101 | 1.032525 |
| North Africa and Middle East | 2019 | 1.017794 | 1.032346 |
| Oceania                      | 1990 | 0.714981 | 0.712764 |
| Oceania                      | 1991 | 0.713966 | 0.709276 |
| Oceania                      | 1992 | 0.715391 | 0.707661 |
| Oceania                      | 1993 | 0.716127 | 0.705628 |
| Oceania                      | 1994 | 0.717851 | 0.704957 |
| Oceania                      | 1995 | 0.720437 | 0.708679 |
| Oceania                      | 1996 | 0.728436 | 0.718749 |
| Oceania                      | 1997 | 0.73471  | 0.724774 |
| Oceania                      | 1998 | 0.74027  | 0.731    |
| Oceania                      | 1999 | 0.740747 | 0.73015  |

1  
2  
3  
4  
5  
6  
7  
8  
9  
10  
11  
12  
13  
14  
15  
16  
17  
18  
19  
20  
21  
22  
23  
24  
25  
26  
27  
28  
29  
30  
31  
32  
33  
34  
35  
36  
37  
38  
39  
40  
41  
42  
43  
44  
45  
46

|         |      |          |          |
|---------|------|----------|----------|
| Oceania | 2000 | 0.739459 | 0.729167 |
| Oceania | 2001 | 0.732115 | 0.724288 |
| Oceania | 2002 | 0.737227 | 0.727466 |
| Oceania | 2003 | 0.745093 | 0.73641  |
| Oceania | 2004 | 0.743631 | 0.734994 |
| Oceania | 2005 | 0.727771 | 0.719476 |
| Oceania | 2006 | 0.721573 | 0.712822 |
| Oceania | 2007 | 0.715807 | 0.705716 |
| Oceania | 2008 | 0.711278 | 0.705836 |
| Oceania | 2009 | 0.708497 | 0.704765 |
| Oceania | 2010 | 0.697016 | 0.695086 |
| Oceania | 2011 | 0.685978 | 0.686528 |
| Oceania | 2012 | 0.677235 | 0.68009  |

|            |      |          |          |
|------------|------|----------|----------|
| Oceania    | 2013 | 0.672653 | 0.677716 |
| Oceania    | 2014 | 0.668907 | 0.674571 |
| Oceania    | 2015 | 0.668124 | 0.67487  |
| Oceania    | 2016 | 0.667828 | 0.674982 |
| Oceania    | 2017 | 0.664246 | 0.672026 |
| Oceania    | 2018 | 0.659172 | 0.669561 |
| Oceania    | 2019 | 0.660332 | 0.672439 |
| South Asia | 1990 | 0.66507  | 0.698583 |
| South Asia | 1991 | 0.661937 | 0.69396  |
| South Asia | 1992 | 0.675911 | 0.704971 |
| South Asia | 1993 | 0.671216 | 0.699226 |
| South Asia | 1994 | 0.670005 | 0.695142 |
| South Asia | 1995 | 0.673903 | 0.695892 |



1  
2  
3  
4  
5  
6  
7  
8  
9  
10  
11  
12  
13  
14  
15  
16  
17  
18  
19  
20  
21  
22  
23  
24  
25  
26  
27  
28  
29  
30  
31  
32  
33  
34  
35  
36  
37  
38  
39  
40  
41  
42  
43  
44  
45  
46

|            |      |          |          |
|------------|------|----------|----------|
| South Asia | 1996 | 0.673456 | 0.689668 |
| South Asia | 1997 | 0.675591 | 0.688244 |
| South Asia | 1998 | 0.68373  | 0.697407 |
| South Asia | 1999 | 0.682567 | 0.698546 |
| South Asia | 2000 | 0.669169 | 0.681507 |
| South Asia | 2001 | 0.669284 | 0.679742 |
| South Asia | 2002 | 0.667592 | 0.676094 |
| South Asia | 2003 | 0.654533 | 0.65867  |
| South Asia | 2004 | 0.648943 | 0.64878  |
| South Asia | 2005 | 0.646784 | 0.643141 |
| South Asia | 2006 | 0.64926  | 0.645759 |
| South Asia | 2007 | 0.650865 | 0.646551 |
| South Asia | 2008 | 0.644718 | 0.637315 |

|                |      |          |          |
|----------------|------|----------|----------|
| South Asia     | 2009 | 0.648902 | 0.634807 |
| South Asia     | 2010 | 0.661674 | 0.639831 |
| South Asia     | 2011 | 0.666136 | 0.642593 |
| South Asia     | 2012 | 0.677551 | 0.653581 |
| South Asia     | 2013 | 0.700175 | 0.664938 |
| South Asia     | 2014 | 0.725503 | 0.679458 |
| South Asia     | 2015 | 0.75062  | 0.703432 |
| South Asia     | 2016 | 0.752504 | 0.708796 |
| South Asia     | 2017 | 0.754074 | 0.711262 |
| South Asia     | 2018 | 0.755202 | 0.708314 |
| South Asia     | 2019 | 0.759717 | 0.712613 |
| Southeast Asia | 1990 | 0.996027 | 0.865118 |
| Southeast Asia | 1991 | 0.986435 | 0.857618 |

1  
2  
3  
4  
5  
6  
7  
8  
9  
10  
11  
12  
13  
14  
15  
16  
17  
18  
19  
20  
21  
22  
23  
24  
25  
26  
27  
28  
29  
30  
31  
32  
33  
34  
35  
36  
37  
38  
39  
40  
41  
42  
43  
44  
45  
46

|                |      |          |          |
|----------------|------|----------|----------|
| Southeast Asia | 1992 | 0.979521 | 0.851068 |
| Southeast Asia | 1993 | 0.975002 | 0.847726 |
| Southeast Asia | 1994 | 0.966841 | 0.841815 |
| Southeast Asia | 1995 | 0.959653 | 0.8355   |
| Southeast Asia | 1996 | 0.958879 | 0.833157 |
| Southeast Asia | 1997 | 0.967228 | 0.835268 |
| Southeast Asia | 1998 | 0.968374 | 0.828115 |
| Southeast Asia | 1999 | 0.974419 | 0.832331 |
| Southeast Asia | 2000 | 0.982661 | 0.837888 |
| Southeast Asia | 2001 | 0.989978 | 0.845043 |
| Southeast Asia | 2002 | 1.00304  | 0.857111 |
| Southeast Asia | 2003 | 1.00702  | 0.86077  |
| Southeast Asia | 2004 | 1.010903 | 0.865647 |

|                |      |          |          |
|----------------|------|----------|----------|
| Southeast Asia | 2005 | 1.009594 | 0.864883 |
| Southeast Asia | 2006 | 1.006894 | 0.863283 |
| Southeast Asia | 2007 | 1.004802 | 0.862165 |
| Southeast Asia | 2008 | 0.998931 | 0.857502 |
| Southeast Asia | 2009 | 0.993168 | 0.853077 |
| Southeast Asia | 2010 | 0.985052 | 0.846161 |
| Southeast Asia | 2011 | 0.972286 | 0.836049 |
| Southeast Asia | 2012 | 0.961676 | 0.827129 |
| Southeast Asia | 2013 | 0.957614 | 0.824501 |
| Southeast Asia | 2014 | 0.947844 | 0.816169 |
| Southeast Asia | 2015 | 0.944072 | 0.811403 |
| Southeast Asia | 2016 | 0.944548 | 0.810911 |
| Southeast Asia | 2017 | 0.954061 | 0.817224 |

1  
2  
3  
4  
5  
6  
7  
8  
9  
10  
11  
12  
13  
14  
15  
16  
17  
18  
19  
20  
21  
22  
23  
24  
25  
26  
27  
28  
29  
30  
31  
32  
33  
34  
35  
36  
37  
38  
39  
40  
41  
42  
43  
44  
45  
46

|                        |      |          |          |
|------------------------|------|----------|----------|
| Southeast Asia         | 2018 | 0.963672 | 0.823881 |
| Southeast Asia         | 2019 | 0.970656 | 0.827904 |
| Southern Latin America | 1990 | 0.836852 | 0.615026 |
| Southern Latin America | 1991 | 0.840997 | 0.616255 |
| Southern Latin America | 1992 | 0.838523 | 0.611796 |
| Southern Latin America | 1993 | 0.846781 | 0.613563 |
| Southern Latin America | 1994 | 0.858913 | 0.620038 |
| Southern Latin America | 1995 | 0.870687 | 0.623389 |
| Southern Latin America | 1996 | 0.877568 | 0.623542 |
| Southern Latin America | 1997 | 0.900245 | 0.635494 |
| Southern Latin America | 1998 | 0.924286 | 0.646916 |
| Southern Latin America | 1999 | 0.940666 | 0.653284 |
| Southern Latin America | 2000 | 0.951995 | 0.657239 |

|                        |      |          |          |
|------------------------|------|----------|----------|
| Southern Latin America | 2001 | 0.954878 | 0.65674  |
| Southern Latin America | 2002 | 0.947038 | 0.648019 |
| Southern Latin America | 2003 | 0.954421 | 0.648565 |
| Southern Latin America | 2004 | 0.958557 | 0.647573 |
| Southern Latin America | 2005 | 0.957894 | 0.645642 |
| Southern Latin America | 2006 | 0.968127 | 0.651186 |
| Southern Latin America | 2007 | 0.96893  | 0.649748 |
| Southern Latin America | 2008 | 0.980789 | 0.657073 |
| Southern Latin America | 2009 | 0.982553 | 0.65619  |
| Southern Latin America | 2010 | 0.995161 | 0.660136 |
| Southern Latin America | 2011 | 1.000659 | 0.661048 |
| Southern Latin America | 2012 | 0.997452 | 0.658189 |
| Southern Latin America | 2013 | 1.004457 | 0.661778 |

1  
2  
3  
4  
5  
6  
7  
8  
9  
10  
11  
12  
13  
14  
15  
16  
17  
18  
19  
20  
21  
22  
23  
24  
25  
26  
27  
28  
29  
30  
31  
32  
33  
34  
35  
36  
37  
38  
39  
40  
41  
42  
43  
44  
45  
46

|                             |      |          |          |
|-----------------------------|------|----------|----------|
| Southern Latin America      | 2014 | 1.008837 | 0.663532 |
| Southern Latin America      | 2015 | 1.005479 | 0.661634 |
| Southern Latin America      | 2016 | 0.998337 | 0.657825 |
| Southern Latin America      | 2017 | 0.994391 | 0.65736  |
| Southern Latin America      | 2018 | 0.995722 | 0.662491 |
| Southern Latin America      | 2019 | 0.992334 | 0.66318  |
| Southern Sub-Saharan Africa | 1990 | 0.799727 | 0.566804 |
| Southern Sub-Saharan Africa | 1991 | 0.776829 | 0.54927  |
| Southern Sub-Saharan Africa | 1992 | 0.820106 | 0.577714 |
| Southern Sub-Saharan Africa | 1993 | 0.774803 | 0.54824  |
| Southern Sub-Saharan Africa | 1994 | 0.788186 | 0.555732 |
| Southern Sub-Saharan Africa | 1995 | 0.709621 | 0.502163 |
| Southern Sub-Saharan Africa | 1996 | 0.706395 | 0.498609 |

|                             |      |          |          |
|-----------------------------|------|----------|----------|
| Southern Sub-Saharan Africa | 1997 | 0.742709 | 0.519068 |
| Southern Sub-Saharan Africa | 1998 | 0.733636 | 0.510162 |
| Southern Sub-Saharan Africa | 1999 | 0.753431 | 0.518147 |
| Southern Sub-Saharan Africa | 2000 | 0.778592 | 0.53112  |
| Southern Sub-Saharan Africa | 2001 | 0.780906 | 0.52916  |
| Southern Sub-Saharan Africa | 2002 | 0.791602 | 0.532937 |
| Southern Sub-Saharan Africa | 2003 | 0.798728 | 0.534572 |
| Southern Sub-Saharan Africa | 2004 | 0.802828 | 0.536106 |
| Southern Sub-Saharan Africa | 2005 | 0.800053 | 0.534634 |
| Southern Sub-Saharan Africa | 2006 | 0.805583 | 0.537221 |
| Southern Sub-Saharan Africa | 2007 | 0.802574 | 0.536309 |
| Southern Sub-Saharan Africa | 2008 | 0.807065 | 0.539654 |
| Southern Sub-Saharan Africa | 2009 | 0.812728 | 0.542922 |



1  
2  
3  
4  
5  
6  
7  
8  
9  
10  
11  
12  
13  
14  
15  
16  
17  
18  
19  
20  
21  
22  
23  
24  
25  
26  
27  
28  
29  
30  
31  
32  
33  
34  
35  
36  
37  
38  
39  
40  
41  
42  
43  
44  
45  
46

|                             |      |          |          |
|-----------------------------|------|----------|----------|
| Southern Sub-Saharan Africa | 2010 | 0.815654 | 0.542544 |
| Southern Sub-Saharan Africa | 2011 | 0.825888 | 0.547379 |
| Southern Sub-Saharan Africa | 2012 | 0.83456  | 0.554376 |
| Southern Sub-Saharan Africa | 2013 | 0.843888 | 0.56142  |
| Southern Sub-Saharan Africa | 2014 | 0.858826 | 0.572506 |
| Southern Sub-Saharan Africa | 2015 | 0.861626 | 0.576232 |
| Southern Sub-Saharan Africa | 2016 | 0.862458 | 0.57647  |
| Southern Sub-Saharan Africa | 2017 | 0.850199 | 0.571158 |
| Southern Sub-Saharan Africa | 2018 | 0.834525 | 0.564877 |
| Southern Sub-Saharan Africa | 2019 | 0.832604 | 0.566608 |
| Tropical Latin America      | 1990 | 0.868384 | 0.734218 |
| Tropical Latin America      | 1991 | 0.871664 | 0.732863 |
| Tropical Latin America      | 1992 | 0.872822 | 0.730195 |

|                        |      |          |          |
|------------------------|------|----------|----------|
| Tropical Latin America | 1993 | 0.870659 | 0.725086 |
| Tropical Latin America | 1994 | 0.872989 | 0.725556 |
| Tropical Latin America | 1995 | 0.8882   | 0.736898 |
| Tropical Latin America | 1996 | 0.90161  | 0.748706 |
| Tropical Latin America | 1997 | 0.912623 | 0.755214 |
| Tropical Latin America | 1998 | 0.915054 | 0.754469 |
| Tropical Latin America | 1999 | 0.919973 | 0.756125 |
| Tropical Latin America | 2000 | 0.92274  | 0.755265 |
| Tropical Latin America | 2001 | 0.92301  | 0.75235  |
| Tropical Latin America | 2002 | 0.925579 | 0.750251 |
| Tropical Latin America | 2003 | 0.914222 | 0.737044 |
| Tropical Latin America | 2004 | 0.908803 | 0.729144 |
| Tropical Latin America | 2005 | 0.909014 | 0.726955 |

1  
2  
3  
4  
5  
6  
7  
8  
9  
10  
11  
12  
13  
14  
15  
16  
17  
18  
19  
20  
21  
22  
23  
24  
25  
26  
27  
28  
29  
30  
31  
32  
33  
34  
35  
36  
37  
38  
39  
40  
41  
42  
43  
44  
45  
46

|                        |      |          |          |
|------------------------|------|----------|----------|
| Tropical Latin America | 2006 | 0.914548 | 0.728219 |
| Tropical Latin America | 2007 | 0.91622  | 0.726039 |
| Tropical Latin America | 2008 | 0.918839 | 0.724886 |
| Tropical Latin America | 2009 | 0.924596 | 0.725983 |
| Tropical Latin America | 2010 | 0.927897 | 0.724711 |
| Tropical Latin America | 2011 | 0.927844 | 0.721599 |
| Tropical Latin America | 2012 | 0.930201 | 0.720433 |
| Tropical Latin America | 2013 | 0.92795  | 0.715936 |
| Tropical Latin America | 2014 | 0.925154 | 0.711512 |
| Tropical Latin America | 2015 | 0.925393 | 0.70904  |
| Tropical Latin America | 2016 | 0.917662 | 0.700946 |
| Tropical Latin America | 2017 | 0.92015  | 0.701317 |
| Tropical Latin America | 2018 | 0.927136 | 0.707273 |

|                        |      |          |          |
|------------------------|------|----------|----------|
| Tropical Latin America | 2019 | 0.922426 | 0.703827 |
| Western Europe         | 1990 | 1.187221 | 0.636881 |
| Western Europe         | 1991 | 1.17978  | 0.631171 |
| Western Europe         | 1992 | 1.179064 | 0.629347 |
| Western Europe         | 1993 | 1.181449 | 0.629072 |
| Western Europe         | 1994 | 1.189826 | 0.632836 |
| Western Europe         | 1995 | 1.191172 | 0.631937 |
| Western Europe         | 1996 | 1.195132 | 0.632473 |
| Western Europe         | 1997 | 1.206631 | 0.637573 |
| Western Europe         | 1998 | 1.213062 | 0.641914 |
| Western Europe         | 1999 | 1.216683 | 0.643583 |
| Western Europe         | 2000 | 1.234761 | 0.651178 |
| Western Europe         | 2001 | 1.2483   | 0.658031 |

1  
2  
3  
4  
5  
6  
7  
8  
9  
10  
11  
12  
13  
14  
15  
16  
17  
18  
19  
20  
21  
22  
23  
24  
25  
26  
27  
28  
29  
30  
31  
32  
33  
34  
35  
36  
37  
38  
39  
40  
41  
42  
43  
44  
45  
46

|                |      |          |          |
|----------------|------|----------|----------|
| Western Europe | 2002 | 1.257153 | 0.663607 |
| Western Europe | 2003 | 1.260606 | 0.667379 |
| Western Europe | 2004 | 1.27021  | 0.674738 |
| Western Europe | 2005 | 1.276144 | 0.679276 |
| Western Europe | 2006 | 1.279993 | 0.683381 |
| Western Europe | 2007 | 1.283076 | 0.68944  |
| Western Europe | 2008 | 1.289726 | 0.697937 |
| Western Europe | 2009 | 1.287437 | 0.701796 |
| Western Europe | 2010 | 1.288567 | 0.70405  |
| Western Europe | 2011 | 1.303959 | 0.711458 |
| Western Europe | 2012 | 1.310276 | 0.715725 |
| Western Europe | 2013 | 1.313979 | 0.720856 |
| Western Europe | 2014 | 1.317178 | 0.725604 |

|                            |      |          |          |
|----------------------------|------|----------|----------|
| Western Europe             | 2015 | 1.310931 | 0.726156 |
| Western Europe             | 2016 | 1.310262 | 0.730428 |
| Western Europe             | 2017 | 1.285904 | 0.726461 |
| Western Europe             | 2018 | 1.279483 | 0.731767 |
| Western Europe             | 2019 | 1.263779 | 0.731772 |
| Western Sub-Saharan Africa | 1990 | 0.943231 | 0.876176 |
| Western Sub-Saharan Africa | 1991 | 0.93766  | 0.874746 |
| Western Sub-Saharan Africa | 1992 | 0.931574 | 0.874356 |
| Western Sub-Saharan Africa | 1993 | 0.922468 | 0.87055  |
| Western Sub-Saharan Africa | 1994 | 0.915253 | 0.867589 |
| Western Sub-Saharan Africa | 1995 | 0.906125 | 0.861331 |
| Western Sub-Saharan Africa | 1996 | 0.896934 | 0.855647 |
| Western Sub-Saharan Africa | 1997 | 0.893333 | 0.854683 |

1  
2  
3  
4  
5  
6  
7  
8  
9  
10  
11  
12  
13  
14  
15  
16  
17  
18  
19  
20  
21  
22  
23  
24  
25  
26  
27  
28  
29  
30  
31  
32  
33  
34  
35  
36  
37  
38  
39  
40  
41  
42  
43  
44  
45  
46

|                            |      |          |          |
|----------------------------|------|----------|----------|
| Western Sub-Saharan Africa | 1998 | 0.884804 | 0.84926  |
| Western Sub-Saharan Africa | 1999 | 0.870291 | 0.83736  |
| Western Sub-Saharan Africa | 2000 | 0.86047  | 0.828306 |
| Western Sub-Saharan Africa | 2001 | 0.852357 | 0.822349 |
| Western Sub-Saharan Africa | 2002 | 0.846533 | 0.817614 |
| Western Sub-Saharan Africa | 2003 | 0.839041 | 0.812645 |
| Western Sub-Saharan Africa | 2004 | 0.830404 | 0.80605  |
| Western Sub-Saharan Africa | 2005 | 0.822259 | 0.798324 |
| Western Sub-Saharan Africa | 2006 | 0.817552 | 0.793607 |
| Western Sub-Saharan Africa | 2007 | 0.812308 | 0.787728 |
| Western Sub-Saharan Africa | 2008 | 0.805224 | 0.779451 |
| Western Sub-Saharan Africa | 2009 | 0.79906  | 0.771461 |
| Western Sub-Saharan Africa | 2010 | 0.794901 | 0.76539  |

|                            |      |          |          |
|----------------------------|------|----------|----------|
| Western Sub-Saharan Africa | 2011 | 0.793234 | 0.761174 |
| Western Sub-Saharan Africa | 2012 | 0.793325 | 0.757741 |
| Western Sub-Saharan Africa | 2013 | 0.790147 | 0.750627 |
| Western Sub-Saharan Africa | 2014 | 0.79643  | 0.752517 |
| Western Sub-Saharan Africa | 2015 | 0.804319 | 0.755615 |
| Western Sub-Saharan Africa | 2016 | 0.812327 | 0.759468 |
| Western Sub-Saharan Africa | 2017 | 0.822265 | 0.764697 |
| Western Sub-Saharan Africa | 2018 | 0.830106 | 0.768468 |
| Western Sub-Saharan Africa | 2019 | 0.839655 | 0.773633 |



1  
2  
3  
4  
5  
6  
7  
8  
9  
10  
11  
12  
13  
14  
15  
16  
17  
18  
19  
20  
21  
22  
23  
24  
25  
26  
27  
28  
29  
30  
31  
32  
33  
34  
35  
36  
37  
38  
39  
40  
41  
42  
43  
44  
45  
46

**Supplemental table 6. Death cases ratio between females to males and age-standardized death rate (ASDR) ratio between females to males in 204 countries and territories from 1990 to 2019 in 204 countries.**

| location    | year | Ratio of female to male death cases | Ratio of female ASDR to male ASDR |
|-------------|------|-------------------------------------|-----------------------------------|
| Afghanistan | 1990 | 0.961218                            | 0.963112                          |
| Afghanistan | 1991 | 0.961054                            | 0.95357                           |
| Afghanistan | 1992 | 0.957648                            | 0.93756                           |
| Afghanistan | 1993 | 0.960475                            | 0.930057                          |
| Afghanistan | 1994 | 0.965727                            | 0.927966                          |
| Afghanistan | 1995 | 0.967031                            | 0.922941                          |
| Afghanistan | 1996 | 0.96932                             | 0.918637                          |
| Afghanistan | 1997 | 0.969684                            | 0.912595                          |
| Afghanistan | 1998 | 0.972555                            | 0.909395                          |
| Afghanistan | 1999 | 0.980011                            | 0.90888                           |
| Afghanistan | 2000 | 0.985626                            | 0.909379                          |
| Afghanistan | 2001 | 0.993832                            | 0.910933                          |
| Afghanistan | 2002 | 1.000351                            | 0.912563                          |
| Afghanistan | 2003 | 1.015199                            | 0.919405                          |
| Afghanistan | 2004 | 1.036288                            | 0.930023                          |
| Afghanistan | 2005 | 1.050515                            | 0.939235                          |
| Afghanistan | 2006 | 1.060058                            | 0.943996                          |
| Afghanistan | 2007 | 1.06658                             | 0.947329                          |
| Afghanistan | 2008 | 1.078541                            | 0.954077                          |
| Afghanistan | 2009 | 1.09462                             | 0.962852                          |
| Afghanistan | 2010 | 1.110446                            | 0.974819                          |

|    |             |      |          |          |
|----|-------------|------|----------|----------|
| 1  |             |      |          |          |
| 2  |             |      |          |          |
| 3  |             |      |          |          |
| 4  |             |      |          |          |
| 5  | Afghanistan | 2011 | 1.121862 | 0.982551 |
| 6  | Afghanistan | 2012 | 1.126085 | 0.985505 |
| 7  | Afghanistan | 2013 | 1.135187 | 0.991014 |
| 8  | Afghanistan | 2014 | 1.143462 | 0.994594 |
| 9  | Afghanistan | 2015 | 1.148955 | 1.000242 |
| 10 | Afghanistan | 2016 | 1.158044 | 1.008886 |
| 11 | Afghanistan | 2017 | 1.170556 | 1.019302 |
| 12 | Afghanistan | 2018 | 1.180678 | 1.02524  |
| 13 | Afghanistan | 2019 | 1.191846 | 1.032065 |
| 14 | Albania     | 1990 | 0.80288  | 0.611067 |
| 15 | Albania     | 1991 | 0.824545 | 0.633067 |
| 16 | Albania     | 1992 | 0.847876 | 0.64608  |
| 17 | Albania     | 1993 | 0.8389   | 0.634173 |
| 18 | Albania     | 1994 | 0.851827 | 0.63936  |
| 19 | Albania     | 1995 | 0.863218 | 0.645539 |
| 20 | Albania     | 1996 | 0.835124 | 0.620725 |
| 21 | Albania     | 1997 | 0.820214 | 0.614118 |
| 22 | Albania     | 1998 | 0.796342 | 0.603217 |
| 23 | Albania     | 1999 | 0.836725 | 0.632571 |
| 24 | Albania     | 2000 | 0.801031 | 0.607676 |
| 25 | Albania     | 2001 | 0.800875 | 0.612752 |
| 26 | Albania     | 2002 | 0.818988 | 0.631664 |
| 27 | Albania     | 2003 | 0.829379 | 0.645643 |
| 28 | Albania     | 2004 | 0.814148 | 0.640171 |
| 29 | Albania     | 2005 | 0.844958 | 0.66871  |
| 30 |             |      |          |          |
| 31 |             |      |          |          |
| 32 |             |      |          |          |
| 33 |             |      |          |          |
| 34 |             |      |          |          |
| 35 |             |      |          |          |
| 36 |             |      |          |          |
| 37 |             |      |          |          |
| 38 |             |      |          |          |
| 39 |             |      |          |          |
| 40 |             |      |          |          |
| 41 |             |      |          |          |
| 42 |             |      |          |          |
| 43 |             |      |          |          |
| 44 |             |      |          |          |
| 45 |             |      |          |          |
| 46 |             |      |          |          |

1  
2  
3  
4  
5  
6  
7  
8  
9  
10  
11  
12  
13  
14  
15  
16  
17  
18  
19  
20  
21  
22  
23  
24  
25  
26  
27  
28  
29  
30  
31  
32  
33  
34  
35  
36  
37  
38  
39  
40  
41  
42  
43  
44  
45  
46

|         |      |          |          |
|---------|------|----------|----------|
| Albania | 2006 | 0.861627 | 0.685951 |
| Albania | 2007 | 0.878193 | 0.701901 |
| Albania | 2008 | 0.873395 | 0.701159 |
| Albania | 2009 | 0.851996 | 0.687584 |
| Albania | 2010 | 0.836195 | 0.676588 |
| Albania | 2011 | 0.829811 | 0.676367 |
| Albania | 2012 | 0.835089 | 0.683686 |
| Albania | 2013 | 0.835903 | 0.687582 |
| Albania | 2014 | 0.819922 | 0.678315 |
| Albania | 2015 | 0.807743 | 0.670891 |
| Albania | 2016 | 0.816522 | 0.677372 |
| Albania | 2017 | 0.824754 | 0.682594 |
| Albania | 2018 | 0.833083 | 0.687361 |
| Albania | 2019 | 0.84051  | 0.691033 |
| Algeria | 1990 | 1.109457 | 1.137995 |
| Algeria | 1991 | 1.109573 | 1.103907 |
| Algeria | 1992 | 1.104276 | 1.086803 |
| Algeria | 1993 | 1.099944 | 1.074033 |
| Algeria | 1994 | 1.107022 | 1.066426 |
| Algeria | 1995 | 1.109373 | 1.065159 |
| Algeria | 1996 | 1.112722 | 1.065549 |
| Algeria | 1997 | 1.105399 | 1.055999 |
| Algeria | 1998 | 1.093316 | 1.043813 |
| Algeria | 1999 | 1.103667 | 1.053381 |
| Algeria | 2000 | 1.110872 | 1.065961 |

|    |                |      |          |          |
|----|----------------|------|----------|----------|
| 1  |                |      |          |          |
| 2  |                |      |          |          |
| 3  |                |      |          |          |
| 4  |                |      |          |          |
| 5  | Algeria        | 2001 | 1.113195 | 1.075515 |
| 6  | Algeria        | 2002 | 1.11772  | 1.088375 |
| 7  | Algeria        | 2003 | 1.119067 | 1.111271 |
| 8  | Algeria        | 2004 | 1.136506 | 1.142565 |
| 9  | Algeria        | 2005 | 1.14715  | 1.169811 |
| 10 | Algeria        | 2006 | 1.15201  | 1.190973 |
| 11 | Algeria        | 2007 | 1.155168 | 1.209171 |
| 12 | Algeria        | 2008 | 1.15859  | 1.228457 |
| 13 | Algeria        | 2009 | 1.163619 | 1.248209 |
| 14 | Algeria        | 2010 | 1.177218 | 1.286784 |
| 15 | Algeria        | 2011 | 1.186641 | 1.312148 |
| 16 | Algeria        | 2012 | 1.189601 | 1.324703 |
| 17 | Algeria        | 2013 | 1.204505 | 1.349103 |
| 18 | Algeria        | 2014 | 1.219508 | 1.372427 |
| 19 | Algeria        | 2015 | 1.223912 | 1.38569  |
| 20 | Algeria        | 2016 | 1.212958 | 1.379575 |
| 21 | Algeria        | 2017 | 1.211995 | 1.380939 |
| 22 | Algeria        | 2018 | 1.241531 | 1.414697 |
| 23 | Algeria        | 2019 | 1.249033 | 1.426351 |
| 24 | American Samoa | 1990 | 0.612611 | 0.596702 |
| 25 | American Samoa | 1991 | 0.61697  | 0.598437 |
| 26 | American Samoa | 1992 | 0.631844 | 0.608174 |
| 27 | American Samoa | 1993 | 0.653989 | 0.623514 |
| 28 | American Samoa | 1994 | 0.681528 | 0.645433 |
| 29 | American Samoa | 1995 | 0.704734 | 0.662102 |
| 30 |                |      |          |          |
| 31 |                |      |          |          |
| 32 |                |      |          |          |
| 33 |                |      |          |          |
| 34 |                |      |          |          |
| 35 |                |      |          |          |
| 36 |                |      |          |          |
| 37 |                |      |          |          |
| 38 |                |      |          |          |
| 39 |                |      |          |          |
| 40 |                |      |          |          |
| 41 |                |      |          |          |
| 42 |                |      |          |          |
| 43 |                |      |          |          |
| 44 |                |      |          |          |
| 45 |                |      |          |          |
| 46 |                |      |          |          |

|                |      |          |          |
|----------------|------|----------|----------|
| American Samoa | 1996 | 0.730556 | 0.680042 |
| American Samoa | 1997 | 0.750686 | 0.692616 |
| American Samoa | 1998 | 0.768062 | 0.702708 |
| American Samoa | 1999 | 0.803672 | 0.728942 |
| American Samoa | 2000 | 0.82894  | 0.746903 |
| American Samoa | 2001 | 0.858097 | 0.770038 |
| American Samoa | 2002 | 0.853244 | 0.762156 |
| American Samoa | 2003 | 0.879136 | 0.781717 |
| American Samoa | 2004 | 0.893409 | 0.791329 |
| American Samoa | 2005 | 0.864685 | 0.762067 |
| American Samoa | 2006 | 0.856831 | 0.751596 |
| American Samoa | 2007 | 0.840159 | 0.734654 |
| American Samoa | 2008 | 0.82017  | 0.71572  |
| American Samoa | 2009 | 0.807269 | 0.703181 |
| American Samoa | 2010 | 0.797999 | 0.692814 |
| American Samoa | 2011 | 0.806261 | 0.69851  |
| American Samoa | 2012 | 0.825197 | 0.714836 |
| American Samoa | 2013 | 0.829821 | 0.719759 |
| American Samoa | 2014 | 0.829493 | 0.720731 |
| American Samoa | 2015 | 0.835253 | 0.726995 |
| American Samoa | 2016 | 0.834591 | 0.726271 |
| American Samoa | 2017 | 0.83428  | 0.726919 |
| American Samoa | 2018 | 0.833313 | 0.727019 |
| American Samoa | 2019 | 0.832801 | 0.72741  |
| Andorra        | 1990 | 0.788861 | 0.729791 |

|    |         |      |          |          |
|----|---------|------|----------|----------|
| 1  |         |      |          |          |
| 2  |         |      |          |          |
| 3  |         |      |          |          |
| 4  |         |      |          |          |
| 5  | Andorra | 1991 | 0.777657 | 0.721833 |
| 6  | Andorra | 1992 | 0.786613 | 0.72433  |
| 7  | Andorra | 1993 | 0.799267 | 0.736144 |
| 8  | Andorra | 1994 | 0.822512 | 0.748494 |
| 9  | Andorra | 1995 | 0.815241 | 0.73957  |
| 10 | Andorra | 1996 | 0.812205 | 0.734919 |
| 11 | Andorra | 1997 | 0.819344 | 0.731837 |
| 12 | Andorra | 1998 | 0.822769 | 0.728802 |
| 13 | Andorra | 1999 | 0.83361  | 0.726268 |
| 14 | Andorra | 2000 | 0.838352 | 0.725112 |
| 15 | Andorra | 2001 | 0.84257  | 0.723152 |
| 16 | Andorra | 2002 | 0.857376 | 0.721192 |
| 17 | Andorra | 2003 | 0.855856 | 0.717126 |
| 18 | Andorra | 2004 | 0.880115 | 0.725276 |
| 19 | Andorra | 2005 | 0.88978  | 0.727032 |
| 20 | Andorra | 2006 | 0.905426 | 0.732969 |
| 21 | Andorra | 2007 | 0.920575 | 0.73044  |
| 22 | Andorra | 2008 | 0.930871 | 0.739732 |
| 23 | Andorra | 2009 | 0.966364 | 0.755799 |
| 24 | Andorra | 2010 | 0.984365 | 0.766113 |
| 25 | Andorra | 2011 | 1.019081 | 0.772799 |
| 26 | Andorra | 2012 | 1.070344 | 0.791319 |
| 27 | Andorra | 2013 | 1.089581 | 0.811453 |
| 28 | Andorra | 2014 | 1.126724 | 0.832771 |
| 29 | Andorra | 2015 | 1.162229 | 0.859118 |
| 30 |         |      |          |          |
| 31 |         |      |          |          |
| 32 |         |      |          |          |
| 33 |         |      |          |          |
| 34 |         |      |          |          |
| 35 |         |      |          |          |
| 36 |         |      |          |          |
| 37 |         |      |          |          |
| 38 |         |      |          |          |
| 39 |         |      |          |          |
| 40 |         |      |          |          |
| 41 |         |      |          |          |
| 42 |         |      |          |          |
| 43 |         |      |          |          |
| 44 |         |      |          |          |
| 45 |         |      |          |          |
| 46 |         |      |          |          |

|    |         |      |          |          |
|----|---------|------|----------|----------|
| 1  |         |      |          |          |
| 2  |         |      |          |          |
| 3  |         |      |          |          |
| 4  |         |      |          |          |
| 5  | Andorra | 2016 | 1.164998 | 0.860014 |
| 6  | Andorra | 2017 | 1.180541 | 0.862883 |
| 7  | Andorra | 2018 | 1.169541 | 0.866757 |
| 8  | Andorra | 2019 | 1.178874 | 0.871085 |
| 9  |         |      |          |          |
| 10 | Angola  | 1990 | 0.537106 | 0.457811 |
| 11 | Angola  | 1991 | 0.544217 | 0.460671 |
| 12 | Angola  | 1992 | 0.551135 | 0.46428  |
| 13 | Angola  | 1993 | 0.559343 | 0.468348 |
| 14 | Angola  | 1994 | 0.567008 | 0.47207  |
| 15 | Angola  | 1995 | 0.57392  | 0.474355 |
| 16 | Angola  | 1996 | 0.582053 | 0.476191 |
| 17 | Angola  | 1997 | 0.592023 | 0.480883 |
| 18 | Angola  | 1998 | 0.602272 | 0.487081 |
| 19 | Angola  | 1999 | 0.616042 | 0.494658 |
| 20 | Angola  | 2000 | 0.625475 | 0.49915  |
| 21 | Angola  | 2001 | 0.625067 | 0.497084 |
| 22 | Angola  | 2002 | 0.651311 | 0.513815 |
| 23 | Angola  | 2003 | 0.668571 | 0.527179 |
| 24 | Angola  | 2004 | 0.671047 | 0.528362 |
| 25 | Angola  | 2005 | 0.66996  | 0.528374 |
| 26 | Angola  | 2006 | 0.653598 | 0.518225 |
| 27 | Angola  | 2007 | 0.639537 | 0.508693 |
| 28 | Angola  | 2008 | 0.641562 | 0.510323 |
| 29 | Angola  | 2009 | 0.636395 | 0.509296 |
| 30 | Angola  | 2010 | 0.633737 | 0.507852 |
| 31 |         |      |          |          |
| 32 |         |      |          |          |
| 33 |         |      |          |          |
| 34 |         |      |          |          |
| 35 |         |      |          |          |
| 36 |         |      |          |          |
| 37 |         |      |          |          |
| 38 |         |      |          |          |
| 39 |         |      |          |          |
| 40 |         |      |          |          |
| 41 |         |      |          |          |
| 42 |         |      |          |          |
| 43 |         |      |          |          |
| 44 |         |      |          |          |
| 45 |         |      |          |          |
| 46 |         |      |          |          |

|                     |      |          |          |
|---------------------|------|----------|----------|
| Angola              | 2011 | 0.627955 | 0.505033 |
| Angola              | 2012 | 0.619494 | 0.500108 |
| Angola              | 2013 | 0.615684 | 0.497491 |
| Angola              | 2014 | 0.611861 | 0.494839 |
| Angola              | 2015 | 0.618424 | 0.500956 |
| Angola              | 2016 | 0.629456 | 0.509579 |
| Angola              | 2017 | 0.635562 | 0.517839 |
| Angola              | 2018 | 0.641232 | 0.523674 |
| Angola              | 2019 | 0.647501 | 0.530396 |
| Antigua and Barbuda | 1990 | 0.666514 | 0.446543 |
| Antigua and Barbuda | 1991 | 0.715685 | 0.478107 |
| Antigua and Barbuda | 1992 | 0.714282 | 0.479608 |
| Antigua and Barbuda | 1993 | 0.732266 | 0.493697 |
| Antigua and Barbuda | 1994 | 0.736436 | 0.499464 |
| Antigua and Barbuda | 1995 | 0.737658 | 0.502559 |
| Antigua and Barbuda | 1996 | 0.834084 | 0.578888 |
| Antigua and Barbuda | 1997 | 0.849233 | 0.599587 |
| Antigua and Barbuda | 1998 | 0.856383 | 0.615655 |
| Antigua and Barbuda | 1999 | 0.86549  | 0.631337 |
| Antigua and Barbuda | 2000 | 0.88497  | 0.654818 |
| Antigua and Barbuda | 2001 | 0.922952 | 0.693046 |
| Antigua and Barbuda | 2002 | 0.937509 | 0.716928 |
| Antigua and Barbuda | 2003 | 0.931884 | 0.725553 |
| Antigua and Barbuda | 2004 | 0.928461 | 0.73322  |
| Antigua and Barbuda | 2005 | 0.915143 | 0.734142 |



|                     |      |          |          |
|---------------------|------|----------|----------|
| Antigua and Barbuda | 2006 | 0.886643 | 0.717462 |
| Antigua and Barbuda | 2007 | 0.737094 | 0.586594 |
| Antigua and Barbuda | 2008 | 0.740284 | 0.585623 |
| Antigua and Barbuda | 2009 | 0.834307 | 0.66124  |
| Antigua and Barbuda | 2010 | 0.855069 | 0.67682  |
| Antigua and Barbuda | 2011 | 0.878277 | 0.69395  |
| Antigua and Barbuda | 2012 | 0.910791 | 0.720486 |
| Antigua and Barbuda | 2013 | 0.946769 | 0.754748 |
| Antigua and Barbuda | 2014 | 0.946533 | 0.756041 |
| Antigua and Barbuda | 2015 | 0.944465 | 0.754486 |
| Antigua and Barbuda | 2016 | 0.949086 | 0.759164 |
| Antigua and Barbuda | 2017 | 0.961636 | 0.775668 |
| Antigua and Barbuda | 2018 | 0.955232 | 0.775363 |
| Antigua and Barbuda | 2019 | 0.938257 | 0.764103 |
| Argentina           | 1990 | 0.816301 | 0.592396 |
| Argentina           | 1991 | 0.81505  | 0.589561 |
| Argentina           | 1992 | 0.809108 | 0.582187 |
| Argentina           | 1993 | 0.820178 | 0.585302 |
| Argentina           | 1994 | 0.835615 | 0.593134 |
| Argentina           | 1995 | 0.852727 | 0.599872 |
| Argentina           | 1996 | 0.864933 | 0.604446 |
| Argentina           | 1997 | 0.887958 | 0.615809 |
| Argentina           | 1998 | 0.911821 | 0.626255 |
| Argentina           | 1999 | 0.926667 | 0.630847 |
| Argentina           | 2000 | 0.937797 | 0.633938 |

|    |           |      |          |          |
|----|-----------|------|----------|----------|
| 1  |           |      |          |          |
| 2  |           |      |          |          |
| 3  |           |      |          |          |
| 4  |           |      |          |          |
| 5  | Argentina | 2001 | 0.936522 | 0.629952 |
| 6  | Argentina | 2002 | 0.926919 | 0.620389 |
| 7  | Argentina | 2003 | 0.93253  | 0.619629 |
| 8  | Argentina | 2004 | 0.932059 | 0.61577  |
| 9  | Argentina | 2005 | 0.927467 | 0.611552 |
| 10 | Argentina | 2006 | 0.939197 | 0.617824 |
| 11 | Argentina | 2007 | 0.941492 | 0.617118 |
| 12 | Argentina | 2008 | 0.95441  | 0.62448  |
| 13 | Argentina | 2009 | 0.959719 | 0.625646 |
| 14 | Argentina | 2010 | 0.973276 | 0.629635 |
| 15 | Argentina | 2011 | 0.975477 | 0.628524 |
| 16 | Argentina | 2012 | 0.967782 | 0.622803 |
| 17 | Argentina | 2013 | 0.976495 | 0.626864 |
| 18 | Argentina | 2014 | 0.98453  | 0.630903 |
| 19 | Argentina | 2015 | 0.977509 | 0.626764 |
| 20 | Argentina | 2016 | 0.966372 | 0.620702 |
| 21 | Argentina | 2017 | 0.958121 | 0.617106 |
| 22 | Argentina | 2018 | 0.958598 | 0.622691 |
| 23 | Argentina | 2019 | 0.954191 | 0.623212 |
| 24 | Armenia   | 1990 | 0.780068 | 0.518728 |
| 25 | Armenia   | 1991 | 0.765191 | 0.508548 |
| 26 | Armenia   | 1992 | 0.777493 | 0.518524 |
| 27 | Armenia   | 1993 | 0.769502 | 0.514966 |
| 28 | Armenia   | 1994 | 0.767158 | 0.520619 |
| 29 | Armenia   | 1995 | 0.837447 | 0.570209 |
| 30 |           |      |          |          |
| 31 |           |      |          |          |
| 32 |           |      |          |          |
| 33 |           |      |          |          |
| 34 |           |      |          |          |
| 35 |           |      |          |          |
| 36 |           |      |          |          |
| 37 |           |      |          |          |
| 38 |           |      |          |          |
| 39 |           |      |          |          |
| 40 |           |      |          |          |
| 41 |           |      |          |          |
| 42 |           |      |          |          |
| 43 |           |      |          |          |
| 44 |           |      |          |          |
| 45 |           |      |          |          |
| 46 |           |      |          |          |

|    |           |      |          |          |
|----|-----------|------|----------|----------|
| 1  |           |      |          |          |
| 2  |           |      |          |          |
| 3  |           |      |          |          |
| 4  |           |      |          |          |
| 5  | Armenia   | 1996 | 0.883948 | 0.61161  |
| 6  | Armenia   | 1997 | 0.932501 | 0.658905 |
| 7  | Armenia   | 1998 | 0.992186 | 0.709891 |
| 8  | Armenia   | 1999 | 0.977642 | 0.704145 |
| 9  | Armenia   | 2000 | 0.989377 | 0.713448 |
| 10 | Armenia   | 2001 | 0.993407 | 0.722184 |
| 11 | Armenia   | 2002 | 0.975439 | 0.707534 |
| 12 | Armenia   | 2003 | 0.984779 | 0.705606 |
| 13 | Armenia   | 2004 | 0.973642 | 0.687817 |
| 14 | Armenia   | 2005 | 0.955851 | 0.670541 |
| 15 | Armenia   | 2006 | 0.928028 | 0.650275 |
| 16 | Armenia   | 2007 | 1.000884 | 0.697835 |
| 17 | Armenia   | 2008 | 0.930024 | 0.654575 |
| 18 | Armenia   | 2009 | 0.907739 | 0.639381 |
| 19 | Armenia   | 2010 | 0.891967 | 0.618215 |
| 20 | Armenia   | 2011 | 0.858252 | 0.593996 |
| 21 | Armenia   | 2012 | 0.895746 | 0.620641 |
| 22 | Armenia   | 2013 | 0.90243  | 0.62339  |
| 23 | Armenia   | 2014 | 0.879924 | 0.604729 |
| 24 | Armenia   | 2015 | 0.827098 | 0.568261 |
| 25 | Armenia   | 2016 | 0.836569 | 0.574202 |
| 26 | Armenia   | 2017 | 0.838073 | 0.573061 |
| 27 | Armenia   | 2018 | 0.837492 | 0.569781 |
| 28 | Armenia   | 2019 | 0.833053 | 0.566864 |
| 29 | Australia | 1990 | 1.294494 | 0.755478 |
| 30 |           |      |          |          |
| 31 |           |      |          |          |
| 32 |           |      |          |          |
| 33 |           |      |          |          |
| 34 |           |      |          |          |
| 35 |           |      |          |          |
| 36 |           |      |          |          |
| 37 |           |      |          |          |
| 38 |           |      |          |          |
| 39 |           |      |          |          |
| 40 |           |      |          |          |
| 41 |           |      |          |          |
| 42 |           |      |          |          |
| 43 |           |      |          |          |
| 44 |           |      |          |          |
| 45 |           |      |          |          |
| 46 |           |      |          |          |

|           |      |          |          |
|-----------|------|----------|----------|
| Australia | 1991 | 1.288997 | 0.756474 |
| Australia | 1992 | 1.268926 | 0.745579 |
| Australia | 1993 | 1.241153 | 0.728202 |
| Australia | 1994 | 1.226829 | 0.71809  |
| Australia | 1995 | 1.231699 | 0.722381 |
| Australia | 1996 | 1.205226 | 0.709841 |
| Australia | 1997 | 1.191066 | 0.708118 |
| Australia | 1998 | 1.152601 | 0.688628 |
| Australia | 1999 | 1.152189 | 0.689831 |
| Australia | 2000 | 1.138176 | 0.683865 |
| Australia | 2001 | 1.12561  | 0.679441 |
| Australia | 2002 | 1.117703 | 0.674985 |
| Australia | 2003 | 1.095849 | 0.664528 |
| Australia | 2004 | 1.115103 | 0.677657 |
| Australia | 2005 | 1.135883 | 0.692902 |
| Australia | 2006 | 1.143659 | 0.700868 |
| Australia | 2007 | 1.154737 | 0.713041 |
| Australia | 2008 | 1.155029 | 0.717956 |
| Australia | 2009 | 1.164055 | 0.73019  |
| Australia | 2010 | 1.152713 | 0.728706 |
| Australia | 2011 | 1.141979 | 0.729099 |
| Australia | 2012 | 1.137162 | 0.734577 |
| Australia | 2013 | 1.125903 | 0.736751 |
| Australia | 2014 | 1.120436 | 0.740431 |
| Australia | 2015 | 1.10876  | 0.740356 |

1  
2  
3  
4  
5  
6  
7  
8  
9  
10  
11  
12  
13  
14  
15  
16  
17  
18  
19  
20  
21  
22  
23  
24  
25  
26  
27  
28  
29  
30  
31  
32  
33  
34  
35  
36  
37  
38  
39  
40  
41  
42  
43  
44  
45  
46

|           |      |          |          |
|-----------|------|----------|----------|
| Australia | 2016 | 1.102751 | 0.742331 |
| Australia | 2017 | 1.080546 | 0.734664 |
| Australia | 2018 | 1.068638 | 0.734484 |
| Australia | 2019 | 1.053569 | 0.730815 |
| Austria   | 1990 | 1.516235 | 0.715717 |
| Austria   | 1991 | 1.500515 | 0.705711 |
| Austria   | 1992 | 1.491132 | 0.697389 |
| Austria   | 1993 | 1.491922 | 0.696126 |
| Austria   | 1994 | 1.498083 | 0.695299 |
| Austria   | 1995 | 1.517538 | 0.698785 |
| Austria   | 1996 | 1.50472  | 0.689712 |
| Austria   | 1997 | 1.501237 | 0.682791 |
| Austria   | 1998 | 1.494367 | 0.680545 |
| Austria   | 1999 | 1.525297 | 0.695688 |
| Austria   | 2000 | 1.552982 | 0.710282 |
| Austria   | 2001 | 1.556454 | 0.717181 |
| Austria   | 2002 | 1.552057 | 0.722238 |
| Austria   | 2003 | 1.575332 | 0.743031 |
| Austria   | 2004 | 1.543781 | 0.734121 |
| Austria   | 2005 | 1.566323 | 0.744065 |
| Austria   | 2006 | 1.565154 | 0.746048 |
| Austria   | 2007 | 1.574945 | 0.754747 |
| Austria   | 2008 | 1.579287 | 0.761531 |
| Austria   | 2009 | 1.5496   | 0.756153 |
| Austria   | 2010 | 1.565489 | 0.765797 |

|    |            |      |          |          |
|----|------------|------|----------|----------|
| 1  |            |      |          |          |
| 2  |            |      |          |          |
| 3  |            |      |          |          |
| 4  |            |      |          |          |
| 5  | Austria    | 2011 | 1.588252 | 0.779744 |
| 6  | Austria    | 2012 | 1.601134 | 0.789644 |
| 7  | Austria    | 2013 | 1.61478  | 0.803998 |
| 8  | Austria    | 2014 | 1.618171 | 0.816704 |
| 9  | Austria    | 2015 | 1.585412 | 0.805686 |
| 10 | Austria    | 2016 | 1.587994 | 0.814803 |
| 11 | Austria    | 2017 | 1.567843 | 0.81588  |
| 12 | Austria    | 2018 | 1.545369 | 0.82056  |
| 13 | Austria    | 2019 | 1.510565 | 0.817641 |
| 14 | Azerbaijan | 1990 | 0.884919 | 0.65096  |
| 15 | Azerbaijan | 1991 | 0.863564 | 0.647523 |
| 16 | Azerbaijan | 1992 | 0.804415 | 0.631196 |
| 17 | Azerbaijan | 1993 | 0.807115 | 0.640708 |
| 18 | Azerbaijan | 1994 | 0.824097 | 0.657869 |
| 19 | Azerbaijan | 1995 | 0.899597 | 0.689805 |
| 20 | Azerbaijan | 1996 | 0.926688 | 0.699384 |
| 21 | Azerbaijan | 1997 | 0.933708 | 0.708992 |
| 22 | Azerbaijan | 1998 | 0.951881 | 0.72596  |
| 23 | Azerbaijan | 1999 | 0.959192 | 0.7351   |
| 24 | Azerbaijan | 2000 | 0.953873 | 0.735509 |
| 25 | Azerbaijan | 2001 | 0.94505  | 0.732781 |
| 26 | Azerbaijan | 2002 | 0.929063 | 0.726587 |
| 27 | Azerbaijan | 2003 | 0.922196 | 0.729547 |
| 28 | Azerbaijan | 2004 | 0.911869 | 0.736815 |
| 29 | Azerbaijan | 2005 | 0.903185 | 0.741571 |
| 30 |            |      |          |          |
| 31 |            |      |          |          |
| 32 |            |      |          |          |
| 33 |            |      |          |          |
| 34 |            |      |          |          |
| 35 |            |      |          |          |
| 36 |            |      |          |          |
| 37 |            |      |          |          |
| 38 |            |      |          |          |
| 39 |            |      |          |          |
| 40 |            |      |          |          |
| 41 |            |      |          |          |
| 42 |            |      |          |          |
| 43 |            |      |          |          |
| 44 |            |      |          |          |
| 45 |            |      |          |          |
| 46 |            |      |          |          |

|    |            |      |          |          |
|----|------------|------|----------|----------|
| 1  |            |      |          |          |
| 2  |            |      |          |          |
| 3  |            |      |          |          |
| 4  |            |      |          |          |
| 5  | Azerbaijan | 2006 | 0.897948 | 0.739822 |
| 6  | Azerbaijan | 2007 | 0.893294 | 0.736339 |
| 7  | Azerbaijan | 2008 | 0.88655  | 0.739216 |
| 8  | Azerbaijan | 2009 | 0.895969 | 0.749957 |
| 9  | Azerbaijan | 2010 | 0.897182 | 0.756723 |
| 10 | Azerbaijan | 2011 | 0.886579 | 0.749297 |
| 11 | Azerbaijan | 2012 | 0.889392 | 0.748078 |
| 12 | Azerbaijan | 2013 | 0.896214 | 0.759684 |
| 13 | Azerbaijan | 2014 | 0.915751 | 0.771163 |
| 14 | Azerbaijan | 2015 | 0.928454 | 0.781904 |
| 15 | Azerbaijan | 2016 | 0.941756 | 0.786452 |
| 16 | Azerbaijan | 2017 | 0.948794 | 0.792003 |
| 17 | Azerbaijan | 2018 | 0.959219 | 0.807247 |
| 18 | Azerbaijan | 2019 | 0.964069 | 0.81359  |
| 19 | Bahamas    | 1990 | 0.86923  | 0.637024 |
| 20 | Bahamas    | 1991 | 0.873246 | 0.641249 |
| 21 | Bahamas    | 1992 | 0.886863 | 0.654543 |
| 22 | Bahamas    | 1993 | 0.874838 | 0.651853 |
| 23 | Bahamas    | 1994 | 0.865065 | 0.646329 |
| 24 | Bahamas    | 1995 | 0.858317 | 0.644723 |
| 25 | Bahamas    | 1996 | 0.882475 | 0.662296 |
| 26 | Bahamas    | 1997 | 0.890227 | 0.668356 |
| 27 | Bahamas    | 1998 | 0.896911 | 0.667434 |
| 28 | Bahamas    | 1999 | 0.913152 | 0.670192 |
| 29 | Bahamas    | 2000 | 0.946792 | 0.688855 |
| 30 |            |      |          |          |
| 31 |            |      |          |          |
| 32 |            |      |          |          |
| 33 |            |      |          |          |
| 34 |            |      |          |          |
| 35 |            |      |          |          |
| 36 |            |      |          |          |
| 37 |            |      |          |          |
| 38 |            |      |          |          |
| 39 |            |      |          |          |
| 40 |            |      |          |          |
| 41 |            |      |          |          |
| 42 |            |      |          |          |
| 43 |            |      |          |          |
| 44 |            |      |          |          |
| 45 |            |      |          |          |
| 46 |            |      |          |          |

|         |      |          |          |
|---------|------|----------|----------|
| Bahamas | 2001 | 0.933287 | 0.683256 |
| Bahamas | 2002 | 0.961431 | 0.708425 |
| Bahamas | 2003 | 0.980276 | 0.723078 |
| Bahamas | 2004 | 0.969473 | 0.729096 |
| Bahamas | 2005 | 0.976416 | 0.747939 |
| Bahamas | 2006 | 0.965569 | 0.746845 |
| Bahamas | 2007 | 0.959604 | 0.750593 |
| Bahamas | 2008 | 0.937636 | 0.735607 |
| Bahamas | 2009 | 0.95849  | 0.756095 |
| Bahamas | 2010 | 0.962004 | 0.755122 |
| Bahamas | 2011 | 0.94786  | 0.745734 |
| Bahamas | 2012 | 0.940035 | 0.743227 |
| Bahamas | 2013 | 0.993174 | 0.800607 |
| Bahamas | 2014 | 0.966604 | 0.786467 |
| Bahamas | 2015 | 0.93935  | 0.758471 |
| Bahamas | 2016 | 0.934359 | 0.754261 |
| Bahamas | 2017 | 0.929223 | 0.75145  |
| Bahamas | 2018 | 0.912342 | 0.733095 |
| Bahamas | 2019 | 0.901126 | 0.718165 |
| Bahrain | 1990 | 0.96846  | 1.011246 |
| Bahrain | 1991 | 0.955936 | 0.993367 |
| Bahrain | 1992 | 0.958204 | 1.008735 |
| Bahrain | 1993 | 0.960542 | 1.032361 |
| Bahrain | 1994 | 0.914769 | 0.98154  |
| Bahrain | 1995 | 0.867259 | 0.918159 |



1  
2  
3  
4  
5  
6  
7  
8  
9  
10  
11  
12  
13  
14  
15  
16  
17  
18  
19  
20  
21  
22  
23  
24  
25  
26  
27  
28  
29  
30  
31  
32  
33  
34  
35  
36  
37  
38  
39  
40  
41  
42  
43  
44  
45  
46

|            |      |          |          |
|------------|------|----------|----------|
| Bahrain    | 1996 | 0.880086 | 0.927939 |
| Bahrain    | 1997 | 0.841479 | 0.867421 |
| Bahrain    | 1998 | 0.897658 | 0.909906 |
| Bahrain    | 1999 | 0.990692 | 1.012986 |
| Bahrain    | 2000 | 0.997978 | 1.079099 |
| Bahrain    | 2001 | 0.962072 | 1.099497 |
| Bahrain    | 2002 | 0.944778 | 1.025992 |
| Bahrain    | 2003 | 0.88681  | 0.932096 |
| Bahrain    | 2004 | 0.893684 | 0.94323  |
| Bahrain    | 2005 | 0.879997 | 0.951966 |
| Bahrain    | 2006 | 0.845168 | 0.936137 |
| Bahrain    | 2007 | 0.816137 | 0.921743 |
| Bahrain    | 2008 | 0.771081 | 0.894059 |
| Bahrain    | 2009 | 0.739982 | 0.877059 |
| Bahrain    | 2010 | 0.703531 | 0.858101 |
| Bahrain    | 2011 | 0.690148 | 0.841018 |
| Bahrain    | 2012 | 0.696111 | 0.81503  |
| Bahrain    | 2013 | 0.724384 | 0.856791 |
| Bahrain    | 2014 | 0.754134 | 0.915374 |
| Bahrain    | 2015 | 0.761763 | 0.942064 |
| Bahrain    | 2016 | 0.781626 | 0.985433 |
| Bahrain    | 2017 | 0.787411 | 1.010453 |
| Bahrain    | 2018 | 0.761454 | 0.999448 |
| Bahrain    | 2019 | 0.75058  | 1.006894 |
| Bangladesh | 1990 | 0.3804   | 0.716382 |

|            |      |          |          |
|------------|------|----------|----------|
| Bangladesh | 1991 | 0.375512 | 0.70697  |
| Bangladesh | 1992 | 0.395376 | 0.732929 |
| Bangladesh | 1993 | 0.404917 | 0.739799 |
| Bangladesh | 1994 | 0.4091   | 0.741698 |
| Bangladesh | 1995 | 0.419216 | 0.749634 |
| Bangladesh | 1996 | 0.415382 | 0.737888 |
| Bangladesh | 1997 | 0.41797  | 0.73412  |
| Bangladesh | 1998 | 0.43435  | 0.780599 |
| Bangladesh | 1999 | 0.454088 | 0.839102 |
| Bangladesh | 2000 | 0.453657 | 0.843641 |
| Bangladesh | 2001 | 0.459795 | 0.853859 |
| Bangladesh | 2002 | 0.467849 | 0.862316 |
| Bangladesh | 2003 | 0.464491 | 0.839155 |
| Bangladesh | 2004 | 0.462154 | 0.815733 |
| Bangladesh | 2005 | 0.466528 | 0.798544 |
| Bangladesh | 2006 | 0.46469  | 0.773923 |
| Bangladesh | 2007 | 0.454664 | 0.734806 |
| Bangladesh | 2008 | 0.464322 | 0.733483 |
| Bangladesh | 2009 | 0.490683 | 0.758337 |
| Bangladesh | 2010 | 0.52175  | 0.778736 |
| Bangladesh | 2011 | 0.542118 | 0.797312 |
| Bangladesh | 2012 | 0.565715 | 0.822096 |
| Bangladesh | 2013 | 0.586354 | 0.836184 |
| Bangladesh | 2014 | 0.60748  | 0.848881 |
| Bangladesh | 2015 | 0.637512 | 0.868537 |

1  
2  
3  
4  
5  
6  
7  
8  
9  
10  
11  
12  
13  
14  
15  
16  
17  
18  
19  
20  
21  
22  
23  
24  
25  
26  
27  
28  
29  
30  
31  
32  
33  
34  
35  
36  
37  
38  
39  
40  
41  
42  
43  
44  
45  
46

|            |      |          |          |
|------------|------|----------|----------|
| Bangladesh | 2016 | 0.660278 | 0.882671 |
| Bangladesh | 2017 | 0.678338 | 0.88952  |
| Bangladesh | 2018 | 0.698971 | 0.899008 |
| Bangladesh | 2019 | 0.718894 | 0.907048 |
| Barbados   | 1990 | 0.894527 | 0.616642 |
| Barbados   | 1991 | 0.905157 | 0.626068 |
| Barbados   | 1992 | 0.886093 | 0.614058 |
| Barbados   | 1993 | 0.840365 | 0.584046 |
| Barbados   | 1994 | 0.798121 | 0.552412 |
| Barbados   | 1995 | 0.797847 | 0.547842 |
| Barbados   | 1996 | 0.802923 | 0.548148 |
| Barbados   | 1997 | 0.829481 | 0.563764 |
| Barbados   | 1998 | 0.91285  | 0.619466 |
| Barbados   | 1999 | 1.051021 | 0.713134 |
| Barbados   | 2000 | 1.129813 | 0.771219 |
| Barbados   | 2001 | 1.164329 | 0.804694 |
| Barbados   | 2002 | 1.098412 | 0.766947 |
| Barbados   | 2003 | 1.060014 | 0.743981 |
| Barbados   | 2004 | 1.049906 | 0.73631  |
| Barbados   | 2005 | 1.035049 | 0.730984 |
| Barbados   | 2006 | 1.025381 | 0.726048 |
| Barbados   | 2007 | 1.03494  | 0.730463 |
| Barbados   | 2008 | 1.071119 | 0.755906 |
| Barbados   | 2009 | 1.186422 | 0.840113 |
| Barbados   | 2010 | 1.20559  | 0.861409 |

|    |          |      |          |          |
|----|----------|------|----------|----------|
| 1  |          |      |          |          |
| 2  |          |      |          |          |
| 3  |          |      |          |          |
| 4  |          |      |          |          |
| 5  | Barbados | 2011 | 1.256207 | 0.903078 |
| 6  | Barbados | 2012 | 1.232002 | 0.894855 |
| 7  | Barbados | 2013 | 1.244512 | 0.910245 |
| 8  | Barbados | 2014 | 1.226329 | 0.90563  |
| 9  | Barbados | 2015 | 1.219095 | 0.909021 |
| 10 | Barbados | 2016 | 1.20731  | 0.908776 |
| 11 | Barbados | 2017 | 1.18224  | 0.898411 |
| 12 | Barbados | 2018 | 1.136632 | 0.87408  |
| 13 | Barbados | 2019 | 1.057898 | 0.823784 |
| 14 | Belarus  | 1990 | 1.222737 | 0.546785 |
| 15 | Belarus  | 1991 | 1.222589 | 0.542306 |
| 16 | Belarus  | 1992 | 1.222354 | 0.541995 |
| 17 | Belarus  | 1993 | 1.194195 | 0.528192 |
| 18 | Belarus  | 1994 | 1.198027 | 0.525786 |
| 19 | Belarus  | 1995 | 1.190682 | 0.524236 |
| 20 | Belarus  | 1996 | 1.19779  | 0.529672 |
| 21 | Belarus  | 1997 | 1.201862 | 0.530403 |
| 22 | Belarus  | 1998 | 1.180566 | 0.522256 |
| 23 | Belarus  | 1999 | 1.17349  | 0.525554 |
| 24 | Belarus  | 2000 | 1.181038 | 0.537008 |
| 25 | Belarus  | 2001 | 1.11243  | 0.527535 |
| 26 | Belarus  | 2002 | 0.992516 | 0.514932 |
| 27 | Belarus  | 2003 | 0.965662 | 0.512927 |
| 28 | Belarus  | 2004 | 0.987739 | 0.51748  |
| 29 | Belarus  | 2005 | 0.949344 | 0.490265 |
| 30 |          |      |          |          |
| 31 |          |      |          |          |
| 32 |          |      |          |          |
| 33 |          |      |          |          |
| 34 |          |      |          |          |
| 35 |          |      |          |          |
| 36 |          |      |          |          |
| 37 |          |      |          |          |
| 38 |          |      |          |          |
| 39 |          |      |          |          |
| 40 |          |      |          |          |
| 41 |          |      |          |          |
| 42 |          |      |          |          |
| 43 |          |      |          |          |
| 44 |          |      |          |          |
| 45 |          |      |          |          |
| 46 |          |      |          |          |

1  
2  
3  
4  
5  
6  
7  
8  
9  
10  
11  
12  
13  
14  
15  
16  
17  
18  
19  
20  
21  
22  
23  
24  
25  
26  
27  
28  
29  
30  
31  
32  
33  
34  
35  
36  
37  
38  
39  
40  
41  
42  
43  
44  
45  
46

|         |      |          |          |
|---------|------|----------|----------|
| Belarus | 2006 | 0.967082 | 0.492058 |
| Belarus | 2007 | 1.016222 | 0.523081 |
| Belarus | 2008 | 0.997675 | 0.511675 |
| Belarus | 2009 | 1.034343 | 0.52553  |
| Belarus | 2010 | 1.035253 | 0.522242 |
| Belarus | 2011 | 1.052963 | 0.526143 |
| Belarus | 2012 | 1.118591 | 0.540565 |
| Belarus | 2013 | 1.163733 | 0.552405 |
| Belarus | 2014 | 1.170396 | 0.54707  |
| Belarus | 2015 | 1.17895  | 0.546572 |
| Belarus | 2016 | 1.200354 | 0.553718 |
| Belarus | 2017 | 1.181    | 0.545909 |
| Belarus | 2018 | 1.181577 | 0.547002 |
| Belarus | 2019 | 1.173258 | 0.544368 |
| Belgium | 1990 | 1.421385 | 0.740877 |
| Belgium | 1991 | 1.423942 | 0.735281 |
| Belgium | 1992 | 1.445789 | 0.734188 |
| Belgium | 1993 | 1.462333 | 0.731138 |
| Belgium | 1994 | 1.49978  | 0.74798  |
| Belgium | 1995 | 1.496972 | 0.743446 |
| Belgium | 1996 | 1.496832 | 0.734692 |
| Belgium | 1997 | 1.509634 | 0.737004 |
| Belgium | 1998 | 1.514908 | 0.74002  |
| Belgium | 1999 | 1.502728 | 0.733028 |
| Belgium | 2000 | 1.557667 | 0.760407 |

|    |         |      |          |          |
|----|---------|------|----------|----------|
| 1  |         |      |          |          |
| 2  |         |      |          |          |
| 3  |         |      |          |          |
| 4  |         |      |          |          |
| 5  | Belgium | 2001 | 1.583938 | 0.775911 |
| 6  | Belgium | 2002 | 1.586992 | 0.779042 |
| 7  | Belgium | 2003 | 1.581673 | 0.780405 |
| 8  | Belgium | 2004 | 1.568962 | 0.781184 |
| 9  | Belgium | 2005 | 1.5535   | 0.78059  |
| 10 | Belgium | 2006 | 1.536952 | 0.778674 |
| 11 | Belgium | 2007 | 1.518508 | 0.773984 |
| 12 | Belgium | 2008 | 1.485609 | 0.766927 |
| 13 | Belgium | 2009 | 1.472726 | 0.767742 |
| 14 | Belgium | 2010 | 1.455233 | 0.765906 |
| 15 | Belgium | 2011 | 1.438783 | 0.760722 |
| 16 | Belgium | 2012 | 1.407827 | 0.747317 |
| 17 | Belgium | 2013 | 1.420968 | 0.757718 |
| 18 | Belgium | 2014 | 1.426814 | 0.762059 |
| 19 | Belgium | 2015 | 1.453753 | 0.777867 |
| 20 | Belgium | 2016 | 1.443727 | 0.774551 |
| 21 | Belgium | 2017 | 1.418192 | 0.768017 |
| 22 | Belgium | 2018 | 1.412215 | 0.771966 |
| 23 | Belgium | 2019 | 1.395084 | 0.770581 |
| 24 | Belize  | 1990 | 1.00662  | 0.972825 |
| 25 | Belize  | 1991 | 0.965362 | 0.94683  |
| 26 | Belize  | 1992 | 0.931144 | 0.91186  |
| 27 | Belize  | 1993 | 0.932714 | 0.918929 |
| 28 | Belize  | 1994 | 0.931709 | 0.919944 |
| 29 | Belize  | 1995 | 0.88969  | 0.890978 |
| 30 |         |      |          |          |
| 31 |         |      |          |          |
| 32 |         |      |          |          |
| 33 |         |      |          |          |
| 34 |         |      |          |          |
| 35 |         |      |          |          |
| 36 |         |      |          |          |
| 37 |         |      |          |          |
| 38 |         |      |          |          |
| 39 |         |      |          |          |
| 40 |         |      |          |          |
| 41 |         |      |          |          |
| 42 |         |      |          |          |
| 43 |         |      |          |          |
| 44 |         |      |          |          |
| 45 |         |      |          |          |
| 46 |         |      |          |          |

|    |        |      |          |          |
|----|--------|------|----------|----------|
| 1  |        |      |          |          |
| 2  |        |      |          |          |
| 3  |        |      |          |          |
| 4  |        |      |          |          |
| 5  | Belize | 1996 | 0.867909 | 0.868761 |
| 6  | Belize | 1997 | 0.814316 | 0.808436 |
| 7  | Belize | 1998 | 0.749212 | 0.736919 |
| 8  | Belize | 1999 | 0.714264 | 0.689447 |
| 9  | Belize | 2000 | 0.743064 | 0.711691 |
| 10 | Belize | 2001 | 0.79908  | 0.763506 |
| 11 | Belize | 2002 | 0.851249 | 0.81938  |
| 12 | Belize | 2003 | 0.884077 | 0.854598 |
| 13 | Belize | 2004 | 0.886352 | 0.861362 |
| 14 | Belize | 2005 | 0.904799 | 0.880318 |
| 15 | Belize | 2006 | 0.936253 | 0.920596 |
| 16 | Belize | 2007 | 0.939889 | 0.93118  |
| 17 | Belize | 2008 | 0.921785 | 0.919071 |
| 18 | Belize | 2009 | 0.920857 | 0.923895 |
| 19 | Belize | 2010 | 0.915009 | 0.919982 |
| 20 | Belize | 2011 | 0.925972 | 0.936544 |
| 21 | Belize | 2012 | 0.928028 | 0.938017 |
| 22 | Belize | 2013 | 0.940011 | 0.951449 |
| 23 | Belize | 2014 | 0.926192 | 0.934737 |
| 24 | Belize | 2015 | 0.870335 | 0.87185  |
| 25 | Belize | 2016 | 0.849205 | 0.852208 |
| 26 | Belize | 2017 | 0.845053 | 0.848611 |
| 27 | Belize | 2018 | 0.837958 | 0.836727 |
| 28 | Belize | 2019 | 0.830969 | 0.825455 |
| 29 | Benin  | 1990 | 0.79431  | 0.718407 |
| 30 |        |      |          |          |
| 31 |        |      |          |          |
| 32 |        |      |          |          |
| 33 |        |      |          |          |
| 34 |        |      |          |          |
| 35 |        |      |          |          |
| 36 |        |      |          |          |
| 37 |        |      |          |          |
| 38 |        |      |          |          |
| 39 |        |      |          |          |
| 40 |        |      |          |          |
| 41 |        |      |          |          |
| 42 |        |      |          |          |
| 43 |        |      |          |          |
| 44 |        |      |          |          |
| 45 |        |      |          |          |
| 46 |        |      |          |          |

|       |      |          |          |
|-------|------|----------|----------|
| Benin | 1991 | 0.787919 | 0.71165  |
| Benin | 1992 | 0.789963 | 0.712579 |
| Benin | 1993 | 0.792025 | 0.710205 |
| Benin | 1994 | 0.794905 | 0.70809  |
| Benin | 1995 | 0.79705  | 0.707537 |
| Benin | 1996 | 0.797238 | 0.702469 |
| Benin | 1997 | 0.79723  | 0.69874  |
| Benin | 1998 | 0.792817 | 0.690638 |
| Benin | 1999 | 0.787169 | 0.680281 |
| Benin | 2000 | 0.789476 | 0.67662  |
| Benin | 2001 | 0.791888 | 0.674468 |
| Benin | 2002 | 0.795861 | 0.672453 |
| Benin | 2003 | 0.805334 | 0.676195 |
| Benin | 2004 | 0.820154 | 0.684018 |
| Benin | 2005 | 0.837154 | 0.694794 |
| Benin | 2006 | 0.854647 | 0.70472  |
| Benin | 2007 | 0.870698 | 0.715176 |
| Benin | 2008 | 0.864989 | 0.708258 |
| Benin | 2009 | 0.861007 | 0.704984 |
| Benin | 2010 | 0.856749 | 0.700102 |
| Benin | 2011 | 0.848411 | 0.694153 |
| Benin | 2012 | 0.842619 | 0.6896   |
| Benin | 2013 | 0.831281 | 0.682766 |
| Benin | 2014 | 0.834141 | 0.686071 |
| Benin | 2015 | 0.836716 | 0.687831 |



|         |      |          |          |
|---------|------|----------|----------|
| Benin   | 2016 | 0.841937 | 0.693924 |
| Benin   | 2017 | 0.845774 | 0.698568 |
| Benin   | 2018 | 0.84839  | 0.702366 |
| Benin   | 2019 | 0.84808  | 0.705069 |
| Bermuda | 1990 | 0.754029 | 0.536264 |
| Bermuda | 1991 | 0.779454 | 0.553886 |
| Bermuda | 1992 | 0.840547 | 0.599338 |
| Bermuda | 1993 | 0.854096 | 0.607478 |
| Bermuda | 1994 | 0.872814 | 0.618957 |
| Bermuda | 1995 | 0.898129 | 0.634928 |
| Bermuda | 1996 | 0.888039 | 0.626096 |
| Bermuda | 1997 | 0.889982 | 0.625837 |
| Bermuda | 1998 | 0.898389 | 0.629455 |
| Bermuda | 1999 | 0.901327 | 0.628074 |
| Bermuda | 2000 | 0.917436 | 0.635426 |
| Bermuda | 2001 | 0.930333 | 0.644094 |
| Bermuda | 2002 | 0.916068 | 0.634163 |
| Bermuda | 2003 | 0.872629 | 0.604624 |
| Bermuda | 2004 | 0.847269 | 0.587719 |
| Bermuda | 2005 | 0.818464 | 0.567361 |
| Bermuda | 2006 | 0.787899 | 0.546584 |
| Bermuda | 2007 | 0.77141  | 0.533994 |
| Bermuda | 2008 | 0.766299 | 0.528829 |
| Bermuda | 2009 | 0.771124 | 0.5311   |
| Bermuda | 2010 | 0.759957 | 0.523274 |

|    |         |      |          |          |
|----|---------|------|----------|----------|
| 1  |         |      |          |          |
| 2  |         |      |          |          |
| 3  |         |      |          |          |
| 4  |         |      |          |          |
| 5  | Bermuda | 2011 | 0.75285  | 0.518281 |
| 6  | Bermuda | 2012 | 0.746253 | 0.51245  |
| 7  | Bermuda | 2013 | 0.749626 | 0.513518 |
| 8  | Bermuda | 2014 | 0.757856 | 0.518891 |
| 9  | Bermuda | 2015 | 0.769205 | 0.52558  |
| 10 | Bermuda | 2016 | 0.777422 | 0.531834 |
| 11 | Bermuda | 2017 | 0.777963 | 0.532703 |
| 12 | Bermuda | 2018 | 0.776396 | 0.531267 |
| 13 | Bermuda | 2019 | 0.774579 | 0.529411 |
| 14 | Bhutan  | 1990 | 1.150997 | 0.961563 |
| 15 | Bhutan  | 1991 | 1.159768 | 0.976396 |
| 16 | Bhutan  | 1992 | 1.161489 | 0.988481 |
| 17 | Bhutan  | 1993 | 1.162582 | 1.002648 |
| 18 | Bhutan  | 1994 | 1.16165  | 1.015731 |
| 19 | Bhutan  | 1995 | 1.161533 | 1.029975 |
| 20 | Bhutan  | 1996 | 1.155882 | 1.038013 |
| 21 | Bhutan  | 1997 | 1.14839  | 1.044638 |
| 22 | Bhutan  | 1998 | 1.132276 | 1.043871 |
| 23 | Bhutan  | 1999 | 1.117843 | 1.044833 |
| 24 | Bhutan  | 2000 | 1.104612 | 1.044609 |
| 25 | Bhutan  | 2001 | 1.082835 | 1.036621 |
| 26 | Bhutan  | 2002 | 1.060601 | 1.028499 |
| 27 | Bhutan  | 2003 | 1.048045 | 1.026816 |
| 28 | Bhutan  | 2004 | 1.048342 | 1.036155 |
| 29 | Bhutan  | 2005 | 1.045514 | 1.041306 |
| 30 |         |      |          |          |
| 31 |         |      |          |          |
| 32 |         |      |          |          |
| 33 |         |      |          |          |
| 34 |         |      |          |          |
| 35 |         |      |          |          |
| 36 |         |      |          |          |
| 37 |         |      |          |          |
| 38 |         |      |          |          |
| 39 |         |      |          |          |
| 40 |         |      |          |          |
| 41 |         |      |          |          |
| 42 |         |      |          |          |
| 43 |         |      |          |          |
| 44 |         |      |          |          |
| 45 |         |      |          |          |
| 46 |         |      |          |          |

|    |                                  |      |          |          |
|----|----------------------------------|------|----------|----------|
| 1  |                                  |      |          |          |
| 2  |                                  |      |          |          |
| 3  |                                  |      |          |          |
| 4  |                                  |      |          |          |
| 5  | Bhutan                           | 2006 | 1.040212 | 1.045284 |
| 6  | Bhutan                           | 2007 | 1.04562  | 1.054329 |
| 7  | Bhutan                           | 2008 | 1.020866 | 1.035328 |
| 8  | Bhutan                           | 2009 | 0.990419 | 1.00997  |
| 9  | Bhutan                           | 2010 | 0.976659 | 0.999512 |
| 10 | Bhutan                           | 2011 | 0.963328 | 0.988538 |
| 11 | Bhutan                           | 2012 | 0.954794 | 0.981532 |
| 12 | Bhutan                           | 2013 | 0.951871 | 0.978607 |
| 13 | Bhutan                           | 2014 | 0.951886 | 0.977927 |
| 14 | Bhutan                           | 2015 | 0.944963 | 0.969948 |
| 15 | Bhutan                           | 2016 | 0.93875  | 0.962066 |
| 16 | Bhutan                           | 2017 | 0.941255 | 0.962716 |
| 17 | Bhutan                           | 2018 | 0.945337 | 0.964172 |
| 18 | Bhutan                           | 2019 | 0.95056  | 0.966948 |
| 19 | Bolivia (Plurinational State of) | 1990 | 0.961256 | 0.803475 |
| 20 | Bolivia (Plurinational State of) | 1991 | 0.974811 | 0.817495 |
| 21 | Bolivia (Plurinational State of) | 1992 | 1.002636 | 0.843273 |
| 22 | Bolivia (Plurinational State of) | 1993 | 1.017767 | 0.858119 |
| 23 | Bolivia (Plurinational State of) | 1994 | 1.033256 | 0.87403  |
| 24 | Bolivia (Plurinational State of) | 1995 | 1.024883 | 0.870068 |
| 25 | Bolivia (Plurinational State of) | 1996 | 1.017566 | 0.866427 |
| 26 | Bolivia (Plurinational State of) | 1997 | 1.007971 | 0.861273 |
| 27 | Bolivia (Plurinational State of) | 1998 | 0.984129 | 0.841985 |
| 28 | Bolivia (Plurinational State of) | 1999 | 0.966015 | 0.827632 |
| 29 | Bolivia (Plurinational State of) | 2000 | 0.962713 | 0.824518 |
| 30 |                                  |      |          |          |
| 31 |                                  |      |          |          |
| 32 |                                  |      |          |          |
| 33 |                                  |      |          |          |
| 34 |                                  |      |          |          |
| 35 |                                  |      |          |          |
| 36 |                                  |      |          |          |
| 37 |                                  |      |          |          |
| 38 |                                  |      |          |          |
| 39 |                                  |      |          |          |
| 40 |                                  |      |          |          |
| 41 |                                  |      |          |          |
| 42 |                                  |      |          |          |
| 43 |                                  |      |          |          |
| 44 |                                  |      |          |          |
| 45 |                                  |      |          |          |
| 46 |                                  |      |          |          |

|                                  |      |          |          |
|----------------------------------|------|----------|----------|
| Bolivia (Plurinational State of) | 2001 | 0.958932 | 0.820473 |
| Bolivia (Plurinational State of) | 2002 | 0.976256 | 0.835383 |
| Bolivia (Plurinational State of) | 2003 | 0.98302  | 0.842998 |
| Bolivia (Plurinational State of) | 2004 | 0.994413 | 0.853175 |
| Bolivia (Plurinational State of) | 2005 | 1.000176 | 0.857717 |
| Bolivia (Plurinational State of) | 2006 | 0.994393 | 0.853639 |
| Bolivia (Plurinational State of) | 2007 | 1.012508 | 0.870734 |
| Bolivia (Plurinational State of) | 2008 | 1.012945 | 0.872046 |
| Bolivia (Plurinational State of) | 2009 | 1.014013 | 0.874569 |
| Bolivia (Plurinational State of) | 2010 | 1.020693 | 0.882007 |
| Bolivia (Plurinational State of) | 2011 | 1.0303   | 0.892378 |
| Bolivia (Plurinational State of) | 2012 | 1.042369 | 0.905194 |
| Bolivia (Plurinational State of) | 2013 | 1.032939 | 0.899283 |
| Bolivia (Plurinational State of) | 2014 | 1.009051 | 0.880472 |
| Bolivia (Plurinational State of) | 2015 | 1.012061 | 0.885248 |
| Bolivia (Plurinational State of) | 2016 | 1.029472 | 0.902983 |
| Bolivia (Plurinational State of) | 2017 | 1.025379 | 0.901278 |
| Bolivia (Plurinational State of) | 2018 | 1.020638 | 0.898737 |
| Bolivia (Plurinational State of) | 2019 | 1.018462 | 0.897773 |
| Bosnia and Herzegovina           | 1990 | 1.29983  | 0.970983 |
| Bosnia and Herzegovina           | 1991 | 1.288569 | 0.978089 |
| Bosnia and Herzegovina           | 1992 | 1.355309 | 1.027289 |
| Bosnia and Herzegovina           | 1993 | 1.329285 | 0.98292  |
| Bosnia and Herzegovina           | 1994 | 1.34116  | 0.988002 |
| Bosnia and Herzegovina           | 1995 | 1.337425 | 0.976078 |

1  
2  
3  
4  
5  
6  
7  
8  
9  
10  
11  
12  
13  
14  
15  
16  
17  
18  
19  
20  
21  
22  
23  
24  
25  
26  
27  
28  
29  
30  
31  
32  
33  
34  
35  
36  
37  
38  
39  
40  
41  
42  
43  
44  
45  
46

|                        |      |          |          |
|------------------------|------|----------|----------|
| Bosnia and Herzegovina | 1996 | 1.330841 | 0.969336 |
| Bosnia and Herzegovina | 1997 | 1.386711 | 1.048084 |
| Bosnia and Herzegovina | 1998 | 1.325447 | 0.989462 |
| Bosnia and Herzegovina | 1999 | 1.299408 | 0.931218 |
| Bosnia and Herzegovina | 2000 | 1.218634 | 0.856607 |
| Bosnia and Herzegovina | 2001 | 1.246342 | 0.884627 |
| Bosnia and Herzegovina | 2002 | 1.214282 | 0.851942 |
| Bosnia and Herzegovina | 2003 | 1.13905  | 0.783318 |
| Bosnia and Herzegovina | 2004 | 1.143951 | 0.790536 |
| Bosnia and Herzegovina | 2005 | 1.040577 | 0.726236 |
| Bosnia and Herzegovina | 2006 | 1.06114  | 0.738709 |
| Bosnia and Herzegovina | 2007 | 1.0373   | 0.726447 |
| Bosnia and Herzegovina | 2008 | 1.018065 | 0.713553 |
| Bosnia and Herzegovina | 2009 | 1.009822 | 0.716932 |
| Bosnia and Herzegovina | 2010 | 1.0141   | 0.719194 |
| Bosnia and Herzegovina | 2011 | 0.981583 | 0.69969  |
| Bosnia and Herzegovina | 2012 | 1.005197 | 0.710447 |
| Bosnia and Herzegovina | 2013 | 1.013019 | 0.708952 |
| Bosnia and Herzegovina | 2014 | 1.038881 | 0.725823 |
| Bosnia and Herzegovina | 2015 | 1.049397 | 0.736441 |
| Bosnia and Herzegovina | 2016 | 1.040546 | 0.735288 |
| Bosnia and Herzegovina | 2017 | 1.040503 | 0.737686 |
| Bosnia and Herzegovina | 2018 | 1.04249  | 0.738539 |
| Bosnia and Herzegovina | 2019 | 1.043485 | 0.74054  |
| Botswana               | 1990 | 0.537137 | 0.414065 |

|          |      |          |          |
|----------|------|----------|----------|
| Botswana | 1991 | 0.529932 | 0.411447 |
| Botswana | 1992 | 0.518595 | 0.406089 |
| Botswana | 1993 | 0.500924 | 0.397237 |
| Botswana | 1994 | 0.475532 | 0.382303 |
| Botswana | 1995 | 0.445387 | 0.362409 |
| Botswana | 1996 | 0.411066 | 0.337684 |
| Botswana | 1997 | 0.38692  | 0.317997 |
| Botswana | 1998 | 0.388996 | 0.316316 |
| Botswana | 1999 | 0.399472 | 0.320642 |
| Botswana | 2000 | 0.419352 | 0.331758 |
| Botswana | 2001 | 0.440807 | 0.343843 |
| Botswana | 2002 | 0.462907 | 0.35598  |
| Botswana | 2003 | 0.48127  | 0.365153 |
| Botswana | 2004 | 0.485173 | 0.364081 |
| Botswana | 2005 | 0.486513 | 0.361465 |
| Botswana | 2006 | 0.486971 | 0.359767 |
| Botswana | 2007 | 0.517909 | 0.376773 |
| Botswana | 2008 | 0.56281  | 0.404718 |
| Botswana | 2009 | 0.590041 | 0.421971 |
| Botswana | 2010 | 0.61666  | 0.43976  |
| Botswana | 2011 | 0.650044 | 0.462337 |
| Botswana | 2012 | 0.673408 | 0.478454 |
| Botswana | 2013 | 0.698869 | 0.496157 |
| Botswana | 2014 | 0.729034 | 0.517204 |
| Botswana | 2015 | 0.736907 | 0.525176 |

|    |          |      |          |          |
|----|----------|------|----------|----------|
| 1  |          |      |          |          |
| 2  |          |      |          |          |
| 3  |          |      |          |          |
| 4  |          |      |          |          |
| 5  | Botswana | 2016 | 0.736744 | 0.527736 |
| 6  | Botswana | 2017 | 0.741796 | 0.534897 |
| 7  | Botswana | 2018 | 0.745507 | 0.541574 |
| 8  | Botswana | 2019 | 0.749048 | 0.547359 |
| 9  |          |      |          |          |
| 10 | Brazil   | 1990 | 0.868292 | 0.734531 |
| 11 | Brazil   | 1991 | 0.871669 | 0.733028 |
| 12 | Brazil   | 1992 | 0.873059 | 0.730412 |
| 13 | Brazil   | 1993 | 0.870166 | 0.724411 |
| 14 | Brazil   | 1994 | 0.872946 | 0.725148 |
| 15 | Brazil   | 1995 | 0.888112 | 0.736283 |
| 16 | Brazil   | 1996 | 0.901793 | 0.748348 |
| 17 | Brazil   | 1997 | 0.912694 | 0.754577 |
| 18 | Brazil   | 1998 | 0.915702 | 0.754223 |
| 19 | Brazil   | 1999 | 0.920762 | 0.755906 |
| 20 | Brazil   | 2000 | 0.923142 | 0.754715 |
| 21 | Brazil   | 2001 | 0.92368  | 0.75192  |
| 22 | Brazil   | 2002 | 0.926329 | 0.749707 |
| 23 | Brazil   | 2003 | 0.914675 | 0.736203 |
| 24 | Brazil   | 2004 | 0.908924 | 0.728108 |
| 25 | Brazil   | 2005 | 0.909099 | 0.725899 |
| 26 | Brazil   | 2006 | 0.914362 | 0.726873 |
| 27 | Brazil   | 2007 | 0.917005 | 0.725326 |
| 28 | Brazil   | 2008 | 0.919568 | 0.724005 |
| 29 | Brazil   | 2009 | 0.926131 | 0.725645 |
| 30 | Brazil   | 2010 | 0.929564 | 0.724421 |
| 31 |          |      |          |          |
| 32 |          |      |          |          |
| 33 |          |      |          |          |
| 34 |          |      |          |          |
| 35 |          |      |          |          |
| 36 |          |      |          |          |
| 37 |          |      |          |          |
| 38 |          |      |          |          |
| 39 |          |      |          |          |
| 40 |          |      |          |          |
| 41 |          |      |          |          |
| 42 |          |      |          |          |
| 43 |          |      |          |          |
| 44 |          |      |          |          |
| 45 |          |      |          |          |
| 46 |          |      |          |          |

|                   |      |          |          |
|-------------------|------|----------|----------|
| Brazil            | 2011 | 0.929337 | 0.72113  |
| Brazil            | 2012 | 0.932485 | 0.720529 |
| Brazil            | 2013 | 0.929513 | 0.715356 |
| Brazil            | 2014 | 0.928064 | 0.711744 |
| Brazil            | 2015 | 0.93     | 0.710368 |
| Brazil            | 2016 | 0.921374 | 0.701534 |
| Brazil            | 2017 | 0.923842 | 0.701841 |
| Brazil            | 2018 | 0.931119 | 0.708035 |
| Brazil            | 2019 | 0.926425 | 0.704651 |
| Brunei Darussalam | 1990 | 0.730035 | 0.53404  |
| Brunei Darussalam | 1991 | 0.74702  | 0.551392 |
| Brunei Darussalam | 1992 | 0.753832 | 0.561922 |
| Brunei Darussalam | 1993 | 0.761973 | 0.573017 |
| Brunei Darussalam | 1994 | 0.802694 | 0.622696 |
| Brunei Darussalam | 1995 | 0.817759 | 0.648665 |
| Brunei Darussalam | 1996 | 0.850126 | 0.700386 |
| Brunei Darussalam | 1997 | 0.894011 | 0.778129 |
| Brunei Darussalam | 1998 | 0.873648 | 0.765259 |
| Brunei Darussalam | 1999 | 0.871369 | 0.763791 |
| Brunei Darussalam | 2000 | 0.894188 | 0.798016 |
| Brunei Darussalam | 2001 | 0.90963  | 0.83227  |
| Brunei Darussalam | 2002 | 0.886411 | 0.780404 |
| Brunei Darussalam | 2003 | 0.854292 | 0.71243  |
| Brunei Darussalam | 2004 | 0.859174 | 0.715514 |
| Brunei Darussalam | 2005 | 0.84762  | 0.690099 |



1  
2  
3  
4  
5  
6  
7  
8  
9  
10  
11  
12  
13  
14  
15  
16  
17  
18  
19  
20  
21  
22  
23  
24  
25  
26  
27  
28  
29  
30  
31  
32  
33  
34  
35  
36  
37  
38  
39  
40  
41  
42  
43  
44  
45  
46

|                   |      |          |          |
|-------------------|------|----------|----------|
| Brunei Darussalam | 2006 | 0.852917 | 0.685786 |
| Brunei Darussalam | 2007 | 0.882095 | 0.739274 |
| Brunei Darussalam | 2008 | 0.862392 | 0.697695 |
| Brunei Darussalam | 2009 | 0.856274 | 0.659067 |
| Brunei Darussalam | 2010 | 0.855225 | 0.645933 |
| Brunei Darussalam | 2011 | 0.874377 | 0.639123 |
| Brunei Darussalam | 2012 | 0.893294 | 0.618207 |
| Brunei Darussalam | 2013 | 0.887434 | 0.591531 |
| Brunei Darussalam | 2014 | 0.889551 | 0.570037 |
| Brunei Darussalam | 2015 | 0.908183 | 0.567185 |
| Brunei Darussalam | 2016 | 0.908363 | 0.560784 |
| Brunei Darussalam | 2017 | 0.899665 | 0.555    |
| Brunei Darussalam | 2018 | 0.897283 | 0.547615 |
| Brunei Darussalam | 2019 | 0.897071 | 0.549288 |
| Bulgaria          | 1990 | 0.784462 | 0.633343 |
| Bulgaria          | 1991 | 0.8026   | 0.650828 |
| Bulgaria          | 1992 | 0.791893 | 0.644128 |
| Bulgaria          | 1993 | 0.768757 | 0.619671 |
| Bulgaria          | 1994 | 0.766644 | 0.616116 |
| Bulgaria          | 1995 | 0.784155 | 0.626033 |
| Bulgaria          | 1996 | 0.792337 | 0.62834  |
| Bulgaria          | 1997 | 0.81624  | 0.64351  |
| Bulgaria          | 1998 | 0.810752 | 0.633696 |
| Bulgaria          | 1999 | 0.84948  | 0.659797 |
| Bulgaria          | 2000 | 0.827353 | 0.634195 |

|              |      |          |          |
|--------------|------|----------|----------|
| Bulgaria     | 2001 | 0.799274 | 0.605875 |
| Bulgaria     | 2002 | 0.784054 | 0.590177 |
| Bulgaria     | 2003 | 0.761885 | 0.573417 |
| Bulgaria     | 2004 | 0.750577 | 0.563872 |
| Bulgaria     | 2005 | 0.737531 | 0.550685 |
| Bulgaria     | 2006 | 0.740673 | 0.551365 |
| Bulgaria     | 2007 | 0.742368 | 0.548454 |
| Bulgaria     | 2008 | 0.735157 | 0.539766 |
| Bulgaria     | 2009 | 0.733233 | 0.536161 |
| Bulgaria     | 2010 | 0.744196 | 0.543393 |
| Bulgaria     | 2011 | 0.738048 | 0.535808 |
| Bulgaria     | 2012 | 0.742174 | 0.534777 |
| Bulgaria     | 2013 | 0.748018 | 0.538745 |
| Bulgaria     | 2014 | 0.757692 | 0.54565  |
| Bulgaria     | 2015 | 0.768527 | 0.55158  |
| Bulgaria     | 2016 | 0.751909 | 0.541118 |
| Bulgaria     | 2017 | 0.748123 | 0.537571 |
| Bulgaria     | 2018 | 0.757731 | 0.540935 |
| Bulgaria     | 2019 | 0.759446 | 0.540909 |
| Burkina Faso | 1990 | 0.829528 | 0.714538 |
| Burkina Faso | 1991 | 0.822189 | 0.708491 |
| Burkina Faso | 1992 | 0.828201 | 0.71154  |
| Burkina Faso | 1993 | 0.826131 | 0.708344 |
| Burkina Faso | 1994 | 0.828671 | 0.709142 |
| Burkina Faso | 1995 | 0.832397 | 0.710774 |

|              |      |          |          |
|--------------|------|----------|----------|
| Burkina Faso | 1996 | 0.840602 | 0.718042 |
| Burkina Faso | 1997 | 0.855196 | 0.729615 |
| Burkina Faso | 1998 | 0.864386 | 0.736372 |
| Burkina Faso | 1999 | 0.878543 | 0.745592 |
| Burkina Faso | 2000 | 0.896482 | 0.757597 |
| Burkina Faso | 2001 | 0.900208 | 0.758025 |
| Burkina Faso | 2002 | 0.911224 | 0.761005 |
| Burkina Faso | 2003 | 0.922792 | 0.770118 |
| Burkina Faso | 2004 | 0.93218  | 0.777212 |
| Burkina Faso | 2005 | 0.936739 | 0.780345 |
| Burkina Faso | 2006 | 0.941423 | 0.78412  |
| Burkina Faso | 2007 | 0.937418 | 0.779712 |
| Burkina Faso | 2008 | 0.932447 | 0.771837 |
| Burkina Faso | 2009 | 0.932103 | 0.767737 |
| Burkina Faso | 2010 | 0.933339 | 0.766071 |
| Burkina Faso | 2011 | 0.936167 | 0.762728 |
| Burkina Faso | 2012 | 0.933527 | 0.758505 |
| Burkina Faso | 2013 | 0.934327 | 0.753482 |
| Burkina Faso | 2014 | 0.946187 | 0.758672 |
| Burkina Faso | 2015 | 0.965308 | 0.770071 |
| Burkina Faso | 2016 | 0.981429 | 0.778676 |
| Burkina Faso | 2017 | 0.997016 | 0.7884   |
| Burkina Faso | 2018 | 1.006615 | 0.794704 |
| Burkina Faso | 2019 | 1.016562 | 0.801219 |
| Burundi      | 1990 | 0.687664 | 0.563286 |

|         |      |          |          |
|---------|------|----------|----------|
| Burundi | 1991 | 0.694366 | 0.567374 |
| Burundi | 1992 | 0.699582 | 0.571893 |
| Burundi | 1993 | 0.698081 | 0.573959 |
| Burundi | 1994 | 0.696463 | 0.575131 |
| Burundi | 1995 | 0.698699 | 0.57815  |
| Burundi | 1996 | 0.712302 | 0.591291 |
| Burundi | 1997 | 0.719895 | 0.601894 |
| Burundi | 1998 | 0.728608 | 0.614085 |
| Burundi | 1999 | 0.737929 | 0.625256 |
| Burundi | 2000 | 0.734877 | 0.628305 |
| Burundi | 2001 | 0.734869 | 0.631386 |
| Burundi | 2002 | 0.733492 | 0.633296 |
| Burundi | 2003 | 0.733389 | 0.637925 |
| Burundi | 2004 | 0.729231 | 0.640778 |
| Burundi | 2005 | 0.718246 | 0.63823  |
| Burundi | 2006 | 0.703513 | 0.630502 |
| Burundi | 2007 | 0.683863 | 0.619678 |
| Burundi | 2008 | 0.666624 | 0.612776 |
| Burundi | 2009 | 0.663426 | 0.614655 |
| Burundi | 2010 | 0.660953 | 0.616004 |
| Burundi | 2011 | 0.656466 | 0.616586 |
| Burundi | 2012 | 0.654089 | 0.619867 |
| Burundi | 2013 | 0.652141 | 0.622567 |
| Burundi | 2014 | 0.6494   | 0.625271 |
| Burundi | 2015 | 0.644695 | 0.62811  |

1  
2  
3  
4  
5  
6  
7  
8  
9  
10  
11  
12  
13  
14  
15  
16  
17  
18  
19  
20  
21  
22  
23  
24  
25  
26  
27  
28  
29  
30  
31  
32  
33  
34  
35  
36  
37  
38  
39  
40  
41  
42  
43  
44  
45  
46

|            |      |          |          |
|------------|------|----------|----------|
| Burundi    | 2016 | 0.636883 | 0.629837 |
| Burundi    | 2017 | 0.631132 | 0.632785 |
| Burundi    | 2018 | 0.628577 | 0.636035 |
| Burundi    | 2019 | 0.624937 | 0.639786 |
| Cabo Verde | 1990 | 0.785566 | 0.5739   |
| Cabo Verde | 1991 | 0.799078 | 0.581168 |
| Cabo Verde | 1992 | 0.800885 | 0.580711 |
| Cabo Verde | 1993 | 0.780252 | 0.565062 |
| Cabo Verde | 1994 | 0.769012 | 0.55496  |
| Cabo Verde | 1995 | 0.760016 | 0.546382 |
| Cabo Verde | 1996 | 0.725456 | 0.51886  |
| Cabo Verde | 1997 | 0.676563 | 0.479908 |
| Cabo Verde | 1998 | 0.676536 | 0.473741 |
| Cabo Verde | 1999 | 0.676218 | 0.467118 |
| Cabo Verde | 2000 | 0.68503  | 0.466719 |
| Cabo Verde | 2001 | 0.686608 | 0.46229  |
| Cabo Verde | 2002 | 0.688755 | 0.458328 |
| Cabo Verde | 2003 | 0.690284 | 0.453906 |
| Cabo Verde | 2004 | 0.687477 | 0.446744 |
| Cabo Verde | 2005 | 0.684518 | 0.439673 |
| Cabo Verde | 2006 | 0.777244 | 0.500204 |
| Cabo Verde | 2007 | 0.816068 | 0.528048 |
| Cabo Verde | 2008 | 0.819805 | 0.532151 |
| Cabo Verde | 2009 | 0.824293 | 0.537742 |
| Cabo Verde | 2010 | 0.83081  | 0.546195 |

|    |            |      |          |          |
|----|------------|------|----------|----------|
| 5  | Cabo Verde | 2011 | 0.853879 | 0.565047 |
| 6  | Cabo Verde | 2012 | 0.875334 | 0.583896 |
| 7  | Cabo Verde | 2013 | 0.871868 | 0.58662  |
| 9  | Cabo Verde | 2014 | 0.904058 | 0.616563 |
| 10 | Cabo Verde | 2015 | 0.942277 | 0.652128 |
| 11 | Cabo Verde | 2016 | 1.004837 | 0.705484 |
| 12 | Cabo Verde | 2017 | 0.957232 | 0.681284 |
| 13 | Cabo Verde | 2018 | 0.696343 | 0.470762 |
| 14 | Cabo Verde | 2019 | 0.705846 | 0.473874 |
| 17 | Cambodia   | 1990 | 1.272435 | 0.929989 |
| 18 | Cambodia   | 1991 | 1.277283 | 0.931682 |
| 19 | Cambodia   | 1992 | 1.287046 | 0.936978 |
| 20 | Cambodia   | 1993 | 1.299802 | 0.944499 |
| 21 | Cambodia   | 1994 | 1.311296 | 0.951699 |
| 22 | Cambodia   | 1995 | 1.305299 | 0.947258 |
| 23 | Cambodia   | 1996 | 1.305278 | 0.945959 |
| 24 | Cambodia   | 1997 | 1.294164 | 0.937495 |
| 25 | Cambodia   | 1998 | 1.282978 | 0.929409 |
| 26 | Cambodia   | 1999 | 1.272036 | 0.922534 |
| 27 | Cambodia   | 2000 | 1.259729 | 0.913971 |
| 28 | Cambodia   | 2001 | 1.246865 | 0.905562 |
| 29 | Cambodia   | 2002 | 1.239166 | 0.900746 |
| 30 | Cambodia   | 2003 | 1.227679 | 0.89253  |
| 31 | Cambodia   | 2004 | 1.212898 | 0.88247  |
| 32 | Cambodia   | 2005 | 1.193716 | 0.869231 |

1  
2  
3  
4  
5  
6  
7  
8  
9  
10  
11  
12  
13  
14  
15  
16  
17  
18  
19  
20  
21  
22  
23  
24  
25  
26  
27  
28  
29  
30  
31  
32  
33  
34  
35  
36  
37  
38  
39  
40  
41  
42  
43  
44  
45  
46

|          |      |          |          |
|----------|------|----------|----------|
| Cambodia | 2006 | 1.18145  | 0.860138 |
| Cambodia | 2007 | 1.164389 | 0.848923 |
| Cambodia | 2008 | 1.148449 | 0.838274 |
| Cambodia | 2009 | 1.137969 | 0.830565 |
| Cambodia | 2010 | 1.134267 | 0.827896 |
| Cambodia | 2011 | 1.13422  | 0.827352 |
| Cambodia | 2012 | 1.135837 | 0.828119 |
| Cambodia | 2013 | 1.140934 | 0.831604 |
| Cambodia | 2014 | 1.14328  | 0.833467 |
| Cambodia | 2015 | 1.144017 | 0.833629 |
| Cambodia | 2016 | 1.146845 | 0.835286 |
| Cambodia | 2017 | 1.150349 | 0.836871 |
| Cambodia | 2018 | 1.152662 | 0.837604 |
| Cambodia | 2019 | 1.155105 | 0.838245 |
| Cameroon | 1990 | 1.147025 | 1.039542 |
| Cameroon | 1991 | 1.13009  | 1.023941 |
| Cameroon | 1992 | 1.11613  | 1.010117 |
| Cameroon | 1993 | 1.09613  | 0.991193 |
| Cameroon | 1994 | 1.085801 | 0.980193 |
| Cameroon | 1995 | 1.066587 | 0.962355 |
| Cameroon | 1996 | 1.04273  | 0.941254 |
| Cameroon | 1997 | 1.038881 | 0.934436 |
| Cameroon | 1998 | 1.030364 | 0.926553 |
| Cameroon | 1999 | 1.010618 | 0.908515 |
| Cameroon | 2000 | 0.99371  | 0.892449 |

|    |          |      |          |          |
|----|----------|------|----------|----------|
| 1  |          |      |          |          |
| 2  |          |      |          |          |
| 3  |          |      |          |          |
| 4  |          |      |          |          |
| 5  | Cameroon | 2001 | 0.973748 | 0.875349 |
| 6  | Cameroon | 2002 | 0.961464 | 0.860027 |
| 7  | Cameroon | 2003 | 0.950572 | 0.851844 |
| 8  | Cameroon | 2004 | 0.939277 | 0.843458 |
| 9  | Cameroon | 2005 | 0.925508 | 0.832964 |
| 10 | Cameroon | 2006 | 0.916299 | 0.824142 |
| 11 | Cameroon | 2007 | 0.904462 | 0.813191 |
| 12 | Cameroon | 2008 | 0.886022 | 0.796672 |
| 13 | Cameroon | 2009 | 0.876197 | 0.787422 |
| 14 | Cameroon | 2010 | 0.879262 | 0.788679 |
| 15 | Cameroon | 2011 | 0.880561 | 0.789209 |
| 16 | Cameroon | 2012 | 0.878504 | 0.786955 |
| 17 | Cameroon | 2013 | 0.876201 | 0.784414 |
| 18 | Cameroon | 2014 | 0.88642  | 0.793444 |
| 19 | Cameroon | 2015 | 0.894119 | 0.799428 |
| 20 | Cameroon | 2016 | 0.901086 | 0.806824 |
| 21 | Cameroon | 2017 | 0.904634 | 0.810746 |
| 22 | Cameroon | 2018 | 0.904815 | 0.812334 |
| 23 | Cameroon | 2019 | 0.906643 | 0.815062 |
| 24 | Canada   | 1990 | 1.071669 | 0.656583 |
| 25 | Canada   | 1991 | 1.068419 | 0.651509 |
| 26 | Canada   | 1992 | 1.072055 | 0.651547 |
| 27 | Canada   | 1993 | 1.062733 | 0.64336  |
| 28 | Canada   | 1994 | 1.071188 | 0.646973 |
| 29 | Canada   | 1995 | 1.056516 | 0.635922 |
| 30 |          |      |          |          |
| 31 |          |      |          |          |
| 32 |          |      |          |          |
| 33 |          |      |          |          |
| 34 |          |      |          |          |
| 35 |          |      |          |          |
| 36 |          |      |          |          |
| 37 |          |      |          |          |
| 38 |          |      |          |          |
| 39 |          |      |          |          |
| 40 |          |      |          |          |
| 41 |          |      |          |          |
| 42 |          |      |          |          |
| 43 |          |      |          |          |
| 44 |          |      |          |          |
| 45 |          |      |          |          |
| 46 |          |      |          |          |



|                          |      |          |          |
|--------------------------|------|----------|----------|
| Canada                   | 1996 | 1.06505  | 0.637783 |
| Canada                   | 1997 | 1.053599 | 0.628887 |
| Canada                   | 1998 | 1.053543 | 0.626099 |
| Canada                   | 1999 | 1.048713 | 0.618933 |
| Canada                   | 2000 | 1.075001 | 0.633436 |
| Canada                   | 2001 | 1.081442 | 0.635703 |
| Canada                   | 2002 | 1.090276 | 0.639234 |
| Canada                   | 2003 | 1.086281 | 0.636843 |
| Canada                   | 2004 | 1.090858 | 0.638593 |
| Canada                   | 2005 | 1.111257 | 0.652645 |
| Canada                   | 2006 | 1.138485 | 0.671429 |
| Canada                   | 2007 | 1.147179 | 0.680731 |
| Canada                   | 2008 | 1.155455 | 0.690482 |
| Canada                   | 2009 | 1.15475  | 0.694508 |
| Canada                   | 2010 | 1.166421 | 0.707449 |
| Canada                   | 2011 | 1.162524 | 0.712348 |
| Canada                   | 2012 | 1.14527  | 0.710073 |
| Canada                   | 2013 | 1.132927 | 0.710844 |
| Canada                   | 2014 | 1.127098 | 0.715051 |
| Canada                   | 2015 | 1.11813  | 0.716868 |
| Canada                   | 2016 | 1.106954 | 0.71676  |
| Canada                   | 2017 | 1.094248 | 0.715128 |
| Canada                   | 2018 | 1.074678 | 0.709354 |
| Canada                   | 2019 | 1.062453 | 0.707807 |
| Central African Republic | 1990 | 0.605335 | 0.494503 |

|                          |      |          |          |
|--------------------------|------|----------|----------|
| Central African Republic | 1991 | 0.595076 | 0.488287 |
| Central African Republic | 1992 | 0.579631 | 0.476163 |
| Central African Republic | 1993 | 0.593358 | 0.485861 |
| Central African Republic | 1994 | 0.597356 | 0.488188 |
| Central African Republic | 1995 | 0.60126  | 0.490392 |
| Central African Republic | 1996 | 0.606962 | 0.494629 |
| Central African Republic | 1997 | 0.606767 | 0.493809 |
| Central African Republic | 1998 | 0.60576  | 0.491861 |
| Central African Republic | 1999 | 0.601875 | 0.487075 |
| Central African Republic | 2000 | 0.599029 | 0.482639 |
| Central African Republic | 2001 | 0.598767 | 0.482322 |
| Central African Republic | 2002 | 0.601461 | 0.484166 |
| Central African Republic | 2003 | 0.60518  | 0.487199 |
| Central African Republic | 2004 | 0.605982 | 0.487695 |
| Central African Republic | 2005 | 0.60574  | 0.486763 |
| Central African Republic | 2006 | 0.606321 | 0.485265 |
| Central African Republic | 2007 | 0.605549 | 0.483734 |
| Central African Republic | 2008 | 0.602208 | 0.479866 |
| Central African Republic | 2009 | 0.602173 | 0.479239 |
| Central African Republic | 2010 | 0.600321 | 0.478502 |
| Central African Republic | 2011 | 0.601359 | 0.479995 |
| Central African Republic | 2012 | 0.604953 | 0.483166 |
| Central African Republic | 2013 | 0.609224 | 0.485905 |
| Central African Republic | 2014 | 0.609242 | 0.485843 |
| Central African Republic | 2015 | 0.606339 | 0.484164 |

|                          |      |          |          |
|--------------------------|------|----------|----------|
| Central African Republic | 2016 | 0.601069 | 0.48213  |
| Central African Republic | 2017 | 0.596947 | 0.480092 |
| Central African Republic | 2018 | 0.594318 | 0.478991 |
| Central African Republic | 2019 | 0.592694 | 0.479463 |
| Chad                     | 1990 | 0.834872 | 0.761775 |
| Chad                     | 1991 | 0.821838 | 0.752272 |
| Chad                     | 1992 | 0.80896  | 0.744471 |
| Chad                     | 1993 | 0.792107 | 0.732762 |
| Chad                     | 1994 | 0.769123 | 0.714465 |
| Chad                     | 1995 | 0.753542 | 0.702173 |
| Chad                     | 1996 | 0.731651 | 0.68299  |
| Chad                     | 1997 | 0.713377 | 0.666729 |
| Chad                     | 1998 | 0.700701 | 0.655117 |
| Chad                     | 1999 | 0.682246 | 0.638162 |
| Chad                     | 2000 | 0.669872 | 0.626096 |
| Chad                     | 2001 | 0.662084 | 0.61966  |
| Chad                     | 2002 | 0.65693  | 0.616713 |
| Chad                     | 2003 | 0.654422 | 0.618421 |
| Chad                     | 2004 | 0.644129 | 0.613396 |
| Chad                     | 2005 | 0.63571  | 0.610532 |
| Chad                     | 2006 | 0.628836 | 0.607959 |
| Chad                     | 2007 | 0.622864 | 0.607788 |
| Chad                     | 2008 | 0.614477 | 0.605515 |
| Chad                     | 2009 | 0.603446 | 0.603535 |
| Chad                     | 2010 | 0.597793 | 0.602175 |

|       |      |          |          |
|-------|------|----------|----------|
| Chad  | 2011 | 0.591857 | 0.601036 |
| Chad  | 2012 | 0.586086 | 0.600795 |
| Chad  | 2013 | 0.582037 | 0.600969 |
| Chad  | 2014 | 0.578729 | 0.604162 |
| Chad  | 2015 | 0.577133 | 0.606962 |
| Chad  | 2016 | 0.577592 | 0.611944 |
| Chad  | 2017 | 0.579311 | 0.618026 |
| Chad  | 2018 | 0.579088 | 0.621805 |
| Chad  | 2019 | 0.578632 | 0.626191 |
| Chile | 1990 | 0.975267 | 0.789928 |
| Chile | 1991 | 1.004222 | 0.810795 |
| Chile | 1992 | 1.03789  | 0.832208 |
| Chile | 1993 | 1.027902 | 0.817282 |
| Chile | 1994 | 1.024455 | 0.811473 |
| Chile | 1995 | 1.007339 | 0.788872 |
| Chile | 1996 | 0.980229 | 0.755604 |
| Chile | 1997 | 0.99706  | 0.765156 |
| Chile | 1998 | 1.032587 | 0.788071 |
| Chile | 1999 | 1.05249  | 0.799165 |
| Chile | 2000 | 1.06127  | 0.804204 |
| Chile | 2001 | 1.073648 | 0.813752 |
| Chile | 2002 | 1.076179 | 0.809961 |
| Chile | 2003 | 1.080699 | 0.808243 |
| Chile | 2004 | 1.09034  | 0.810053 |
| Chile | 2005 | 1.098112 | 0.812524 |

1  
2  
3  
4  
5  
6  
7  
8  
9  
10  
11  
12  
13  
14  
15  
16  
17  
18  
19  
20  
21  
22  
23  
24  
25  
26  
27  
28  
29  
30  
31  
32  
33  
34  
35  
36  
37  
38  
39  
40  
41  
42  
43  
44  
45  
46

|       |      |          |          |
|-------|------|----------|----------|
| Chile | 2006 | 1.101727 | 0.813429 |
| Chile | 2007 | 1.099118 | 0.810954 |
| Chile | 2008 | 1.101981 | 0.816507 |
| Chile | 2009 | 1.087498 | 0.804882 |
| Chile | 2010 | 1.090558 | 0.803135 |
| Chile | 2011 | 1.106878 | 0.813052 |
| Chile | 2012 | 1.114865 | 0.818805 |
| Chile | 2013 | 1.110409 | 0.816162 |
| Chile | 2014 | 1.0971   | 0.804446 |
| Chile | 2015 | 1.100775 | 0.805611 |
| Chile | 2016 | 1.103035 | 0.806088 |
| Chile | 2017 | 1.114846 | 0.814555 |
| Chile | 2018 | 1.11631  | 0.815553 |
| Chile | 2019 | 1.114836 | 0.814624 |
| China | 1990 | 0.967823 | 0.814115 |
| China | 1991 | 0.958559 | 0.806344 |
| China | 1992 | 0.957942 | 0.80596  |
| China | 1993 | 0.964164 | 0.811179 |
| China | 1994 | 0.973764 | 0.813081 |
| China | 1995 | 0.959877 | 0.800819 |
| China | 1996 | 0.957836 | 0.79771  |
| China | 1997 | 0.962476 | 0.799933 |
| China | 1998 | 0.959408 | 0.790422 |
| China | 1999 | 0.962405 | 0.793427 |
| China | 2000 | 0.96278  | 0.800564 |

|          |      |          |          |
|----------|------|----------|----------|
| China    | 2001 | 0.950333 | 0.789064 |
| China    | 2002 | 0.932042 | 0.776288 |
| China    | 2003 | 0.921262 | 0.772159 |
| China    | 2004 | 0.906997 | 0.757937 |
| China    | 2005 | 0.88725  | 0.735528 |
| China    | 2006 | 0.897301 | 0.739151 |
| China    | 2007 | 0.892122 | 0.729779 |
| China    | 2008 | 0.88588  | 0.720897 |
| China    | 2009 | 0.880109 | 0.711189 |
| China    | 2010 | 0.877856 | 0.705003 |
| China    | 2011 | 0.877119 | 0.697836 |
| China    | 2012 | 0.854498 | 0.672527 |
| China    | 2013 | 0.849703 | 0.664253 |
| China    | 2014 | 0.845928 | 0.661064 |
| China    | 2015 | 0.836498 | 0.650847 |
| China    | 2016 | 0.840203 | 0.651806 |
| China    | 2017 | 0.858599 | 0.666526 |
| China    | 2018 | 0.878564 | 0.683378 |
| China    | 2019 | 0.887628 | 0.688388 |
| Colombia | 1990 | 0.92605  | 0.87332  |
| Colombia | 1991 | 0.88317  | 0.835151 |
| Colombia | 1992 | 0.881827 | 0.827676 |
| Colombia | 1993 | 0.897087 | 0.835138 |
| Colombia | 1994 | 0.897415 | 0.830507 |
| Colombia | 1995 | 0.883693 | 0.818259 |

1  
2  
3  
4  
5  
6  
7  
8  
9  
10  
11  
12  
13  
14  
15  
16  
17  
18  
19  
20  
21  
22  
23  
24  
25  
26  
27  
28  
29  
30  
31  
32  
33  
34  
35  
36  
37  
38  
39  
40  
41  
42  
43  
44  
45  
46

|          |      |          |          |
|----------|------|----------|----------|
| Colombia | 1996 | 0.860237 | 0.790636 |
| Colombia | 1997 | 0.876126 | 0.798379 |
| Colombia | 1998 | 0.887859 | 0.799727 |
| Colombia | 1999 | 0.863474 | 0.772837 |
| Colombia | 2000 | 0.849005 | 0.755909 |
| Colombia | 2001 | 0.850541 | 0.749405 |
| Colombia | 2002 | 0.737513 | 0.644557 |
| Colombia | 2003 | 0.823671 | 0.713566 |
| Colombia | 2004 | 0.815959 | 0.70425  |
| Colombia | 2005 | 0.846694 | 0.725794 |
| Colombia | 2006 | 0.823752 | 0.702385 |
| Colombia | 2007 | 0.834971 | 0.708499 |
| Colombia | 2008 | 0.821626 | 0.69362  |
| Colombia | 2009 | 0.771829 | 0.648857 |
| Colombia | 2010 | 0.78163  | 0.652348 |
| Colombia | 2011 | 0.791119 | 0.65474  |
| Colombia | 2012 | 0.786915 | 0.647334 |
| Colombia | 2013 | 0.795163 | 0.650472 |
| Colombia | 2014 | 0.847073 | 0.690264 |
| Colombia | 2015 | 0.832346 | 0.676081 |
| Colombia | 2016 | 0.829521 | 0.671116 |
| Colombia | 2017 | 0.828961 | 0.667807 |
| Colombia | 2018 | 0.843668 | 0.676432 |
| Colombia | 2019 | 0.843713 | 0.675001 |
| Comoros  | 1990 | 0.733786 | 0.662082 |

|         |      |          |          |
|---------|------|----------|----------|
| Comoros | 1991 | 0.7402   | 0.663758 |
| Comoros | 1992 | 0.745905 | 0.664646 |
| Comoros | 1993 | 0.757544 | 0.670189 |
| Comoros | 1994 | 0.766249 | 0.672645 |
| Comoros | 1995 | 0.775972 | 0.676143 |
| Comoros | 1996 | 0.789989 | 0.682161 |
| Comoros | 1997 | 0.802756 | 0.68778  |
| Comoros | 1998 | 0.828547 | 0.704046 |
| Comoros | 1999 | 0.860904 | 0.725442 |
| Comoros | 2000 | 0.88092  | 0.738351 |
| Comoros | 2001 | 0.907113 | 0.756097 |
| Comoros | 2002 | 0.917167 | 0.761638 |
| Comoros | 2003 | 0.939988 | 0.777236 |
| Comoros | 2004 | 0.947701 | 0.781221 |
| Comoros | 2005 | 0.953186 | 0.787593 |
| Comoros | 2006 | 0.96207  | 0.788326 |
| Comoros | 2007 | 0.950667 | 0.783126 |
| Comoros | 2008 | 0.954273 | 0.785029 |
| Comoros | 2009 | 0.965166 | 0.788867 |
| Comoros | 2010 | 0.983476 | 0.796443 |
| Comoros | 2011 | 0.986429 | 0.798943 |
| Comoros | 2012 | 0.993435 | 0.803484 |
| Comoros | 2013 | 0.994148 | 0.805074 |
| Comoros | 2014 | 0.99033  | 0.809445 |
| Comoros | 2015 | 0.995551 | 0.813129 |



1  
2  
3  
4  
5  
6  
7  
8  
9  
10  
11  
12  
13  
14  
15  
16  
17  
18  
19  
20  
21  
22  
23  
24  
25  
26  
27  
28  
29  
30  
31  
32  
33  
34  
35  
36  
37  
38  
39  
40  
41  
42  
43  
44  
45  
46

|         |      |          |          |
|---------|------|----------|----------|
| Comoros | 2016 | 1.000726 | 0.815787 |
| Comoros | 2017 | 1.006585 | 0.819901 |
| Comoros | 2018 | 1.010868 | 0.821308 |
| Comoros | 2019 | 1.012969 | 0.822834 |
| Congo   | 1990 | 0.751571 | 0.620385 |
| Congo   | 1991 | 0.757008 | 0.620743 |
| Congo   | 1992 | 0.751454 | 0.61207  |
| Congo   | 1993 | 0.767738 | 0.621074 |
| Congo   | 1994 | 0.793581 | 0.640092 |
| Congo   | 1995 | 0.807649 | 0.649302 |
| Congo   | 1996 | 0.843536 | 0.675503 |
| Congo   | 1997 | 0.849181 | 0.678751 |
| Congo   | 1998 | 0.861181 | 0.681345 |
| Congo   | 1999 | 0.873966 | 0.688289 |
| Congo   | 2000 | 0.887117 | 0.693063 |
| Congo   | 2001 | 0.894852 | 0.695199 |
| Congo   | 2002 | 0.91501  | 0.707194 |
| Congo   | 2003 | 0.938097 | 0.727745 |
| Congo   | 2004 | 0.965721 | 0.749928 |
| Congo   | 2005 | 0.999334 | 0.777948 |
| Congo   | 2006 | 1.01017  | 0.790931 |
| Congo   | 2007 | 1.01219  | 0.799437 |
| Congo   | 2008 | 1.011191 | 0.805224 |
| Congo   | 2009 | 1.001536 | 0.805305 |
| Congo   | 2010 | 1.005744 | 0.814986 |

|              |      |          |          |
|--------------|------|----------|----------|
| Congo        | 2011 | 0.995978 | 0.812365 |
| Congo        | 2012 | 0.976587 | 0.809515 |
| Congo        | 2013 | 0.96994  | 0.812844 |
| Congo        | 2014 | 0.962707 | 0.814701 |
| Congo        | 2015 | 0.950028 | 0.810594 |
| Congo        | 2016 | 0.936194 | 0.807464 |
| Congo        | 2017 | 0.929756 | 0.808413 |
| Congo        | 2018 | 0.918173 | 0.804938 |
| Congo        | 2019 | 0.907093 | 0.801955 |
| Cook Islands | 1990 | 0.731273 | 0.737078 |
| Cook Islands | 1991 | 0.714071 | 0.722799 |
| Cook Islands | 1992 | 0.703288 | 0.713012 |
| Cook Islands | 1993 | 0.694466 | 0.703081 |
| Cook Islands | 1994 | 0.691835 | 0.697671 |
| Cook Islands | 1995 | 0.690798 | 0.693392 |
| Cook Islands | 1996 | 0.692286 | 0.692624 |
| Cook Islands | 1997 | 0.691053 | 0.690664 |
| Cook Islands | 1998 | 0.687318 | 0.687769 |
| Cook Islands | 1999 | 0.678993 | 0.681139 |
| Cook Islands | 2000 | 0.670422 | 0.674048 |
| Cook Islands | 2001 | 0.676639 | 0.680259 |
| Cook Islands | 2002 | 0.677434 | 0.678221 |
| Cook Islands | 2003 | 0.672888 | 0.667111 |
| Cook Islands | 2004 | 0.672924 | 0.657395 |
| Cook Islands | 2005 | 0.660459 | 0.636278 |

1  
2  
3  
4  
5  
6  
7  
8  
9  
10  
11  
12  
13  
14  
15  
16  
17  
18  
19  
20  
21  
22  
23  
24  
25  
26  
27  
28  
29  
30  
31  
32  
33  
34  
35  
36  
37  
38  
39  
40  
41  
42  
43  
44  
45  
46

|              |      |          |          |
|--------------|------|----------|----------|
| Cook Islands | 2006 | 0.662874 | 0.630598 |
| Cook Islands | 2007 | 0.655072 | 0.618395 |
| Cook Islands | 2008 | 0.655387 | 0.615491 |
| Cook Islands | 2009 | 0.660637 | 0.619082 |
| Cook Islands | 2010 | 0.662691 | 0.621673 |
| Cook Islands | 2011 | 0.64694  | 0.607209 |
| Cook Islands | 2012 | 0.643794 | 0.603641 |
| Cook Islands | 2013 | 0.648095 | 0.605316 |
| Cook Islands | 2014 | 0.648776 | 0.602425 |
| Cook Islands | 2015 | 0.646748 | 0.597015 |
| Cook Islands | 2016 | 0.64459  | 0.590916 |
| Cook Islands | 2017 | 0.657328 | 0.598123 |
| Cook Islands | 2018 | 0.665537 | 0.601679 |
| Cook Islands | 2019 | 0.673095 | 0.605095 |
| Costa Rica   | 1990 | 0.842686 | 0.780245 |
| Costa Rica   | 1991 | 0.846408 | 0.779555 |
| Costa Rica   | 1992 | 0.801387 | 0.735808 |
| Costa Rica   | 1993 | 0.822401 | 0.751924 |
| Costa Rica   | 1994 | 0.818493 | 0.744542 |
| Costa Rica   | 1995 | 0.809652 | 0.735454 |
| Costa Rica   | 1996 | 0.823017 | 0.742523 |
| Costa Rica   | 1997 | 0.81881  | 0.739022 |
| Costa Rica   | 1998 | 0.833152 | 0.75157  |
| Costa Rica   | 1999 | 0.772513 | 0.695838 |
| Costa Rica   | 2000 | 0.772973 | 0.691908 |

|            |      |          |          |
|------------|------|----------|----------|
| Costa Rica | 2001 | 0.792404 | 0.706965 |
| Costa Rica | 2002 | 0.785335 | 0.698226 |
| Costa Rica | 2003 | 0.789385 | 0.699126 |
| Costa Rica | 2004 | 0.775158 | 0.685789 |
| Costa Rica | 2005 | 0.823794 | 0.726354 |
| Costa Rica | 2006 | 0.794886 | 0.69863  |
| Costa Rica | 2007 | 0.804319 | 0.704393 |
| Costa Rica | 2008 | 0.802687 | 0.700785 |
| Costa Rica | 2009 | 0.824271 | 0.715522 |
| Costa Rica | 2010 | 0.752826 | 0.65028  |
| Costa Rica | 2011 | 0.779381 | 0.666415 |
| Costa Rica | 2012 | 0.797407 | 0.675406 |
| Costa Rica | 2013 | 0.796876 | 0.669869 |
| Costa Rica | 2014 | 0.79033  | 0.658754 |
| Costa Rica | 2015 | 0.788694 | 0.653029 |
| Costa Rica | 2016 | 0.795657 | 0.658021 |
| Costa Rica | 2017 | 0.805902 | 0.664662 |
| Costa Rica | 2018 | 0.785138 | 0.644119 |
| Costa Rica | 2019 | 0.794065 | 0.647561 |
| Croatia    | 1990 | 1.120185 | 0.65127  |
| Croatia    | 1991 | 1.125968 | 0.653247 |
| Croatia    | 1992 | 1.121772 | 0.655144 |
| Croatia    | 1993 | 1.111291 | 0.645602 |
| Croatia    | 1994 | 1.121473 | 0.65099  |
| Croatia    | 1995 | 1.139708 | 0.659749 |

1  
2  
3  
4  
5  
6  
7  
8  
9  
10  
11  
12  
13  
14  
15  
16  
17  
18  
19  
20  
21  
22  
23  
24  
25  
26  
27  
28  
29  
30  
31  
32  
33  
34  
35  
36  
37  
38  
39  
40  
41  
42  
43  
44  
45  
46

|         |      |          |          |
|---------|------|----------|----------|
| Croatia | 1996 | 1.161451 | 0.665951 |
| Croatia | 1997 | 1.152629 | 0.651192 |
| Croatia | 1998 | 1.166428 | 0.64639  |
| Croatia | 1999 | 1.196099 | 0.654948 |
| Croatia | 2000 | 1.216367 | 0.660369 |
| Croatia | 2001 | 1.220003 | 0.655333 |
| Croatia | 2002 | 1.248965 | 0.670539 |
| Croatia | 2003 | 1.232678 | 0.662375 |
| Croatia | 2004 | 1.28712  | 0.691856 |
| Croatia | 2005 | 1.241395 | 0.66823  |
| Croatia | 2006 | 1.256257 | 0.676099 |
| Croatia | 2007 | 1.282833 | 0.69208  |
| Croatia | 2008 | 1.256338 | 0.68161  |
| Croatia | 2009 | 1.257667 | 0.683845 |
| Croatia | 2010 | 1.318366 | 0.725261 |
| Croatia | 2011 | 1.290008 | 0.714134 |
| Croatia | 2012 | 1.250825 | 0.693977 |
| Croatia | 2013 | 1.318069 | 0.727072 |
| Croatia | 2014 | 1.304176 | 0.721959 |
| Croatia | 2015 | 1.322415 | 0.740471 |
| Croatia | 2016 | 1.287002 | 0.722383 |
| Croatia | 2017 | 1.265466 | 0.716749 |
| Croatia | 2018 | 1.256311 | 0.71655  |
| Croatia | 2019 | 1.242454 | 0.714384 |
| Cuba    | 1990 | 0.727847 | 0.702803 |

|      |      |          |          |
|------|------|----------|----------|
| Cuba | 1991 | 0.724469 | 0.694605 |
| Cuba | 1992 | 0.729795 | 0.694633 |
| Cuba | 1993 | 0.720995 | 0.682637 |
| Cuba | 1994 | 0.70017  | 0.659501 |
| Cuba | 1995 | 0.738602 | 0.691371 |
| Cuba | 1996 | 0.766014 | 0.714588 |
| Cuba | 1997 | 0.765753 | 0.712793 |
| Cuba | 1998 | 0.800248 | 0.743681 |
| Cuba | 1999 | 0.812952 | 0.753939 |
| Cuba | 2000 | 0.881295 | 0.814171 |
| Cuba | 2001 | 0.959164 | 0.883325 |
| Cuba | 2002 | 0.988012 | 0.90707  |
| Cuba | 2003 | 1.02399  | 0.936121 |
| Cuba | 2004 | 1.061575 | 0.965081 |
| Cuba | 2005 | 1.074199 | 0.973171 |
| Cuba | 2006 | 1.080161 | 0.975409 |
| Cuba | 2007 | 1.094049 | 0.985931 |
| Cuba | 2008 | 1.115955 | 1.001873 |
| Cuba | 2009 | 1.088237 | 0.972591 |
| Cuba | 2010 | 1.080138 | 0.961158 |
| Cuba | 2011 | 1.104658 | 0.980563 |
| Cuba | 2012 | 1.059809 | 0.939556 |
| Cuba | 2013 | 1.057449 | 0.934553 |
| Cuba | 2014 | 1.045602 | 0.920903 |
| Cuba | 2015 | 1.024565 | 0.900839 |

1  
2  
3  
4  
5  
6  
7  
8  
9  
10  
11  
12  
13  
14  
15  
16  
17  
18  
19  
20  
21  
22  
23  
24  
25  
26  
27  
28  
29  
30  
31  
32  
33  
34  
35  
36  
37  
38  
39  
40  
41  
42  
43  
44  
45  
46

|        |      |          |          |
|--------|------|----------|----------|
| Cuba   | 2016 | 0.999353 | 0.875106 |
| Cuba   | 2017 | 0.976223 | 0.851947 |
| Cuba   | 2018 | 0.979438 | 0.850798 |
| Cuba   | 2019 | 0.984318 | 0.851479 |
| Cyprus | 1990 | 0.973492 | 0.995284 |
| Cyprus | 1991 | 0.870799 | 0.852337 |
| Cyprus | 1992 | 0.836617 | 0.776383 |
| Cyprus | 1993 | 0.865602 | 0.768364 |
| Cyprus | 1994 | 0.894084 | 0.769336 |
| Cyprus | 1995 | 0.884558 | 0.755664 |
| Cyprus | 1996 | 0.850063 | 0.727604 |
| Cyprus | 1997 | 0.836166 | 0.718292 |
| Cyprus | 1998 | 0.862069 | 0.738631 |
| Cyprus | 1999 | 0.890677 | 0.7614   |
| Cyprus | 2000 | 0.839486 | 0.709185 |
| Cyprus | 2001 | 0.828953 | 0.682359 |
| Cyprus | 2002 | 0.831988 | 0.672456 |
| Cyprus | 2003 | 0.888021 | 0.684125 |
| Cyprus | 2004 | 0.889668 | 0.677149 |
| Cyprus | 2005 | 0.883011 | 0.659401 |
| Cyprus | 2006 | 0.876697 | 0.632202 |
| Cyprus | 2007 | 0.867611 | 0.61137  |
| Cyprus | 2008 | 0.874585 | 0.601709 |
| Cyprus | 2009 | 0.842293 | 0.542734 |
| Cyprus | 2010 | 0.842268 | 0.527126 |

|         |      |          |          |
|---------|------|----------|----------|
| Cyprus  | 2011 | 0.902202 | 0.551805 |
| Cyprus  | 2012 | 0.932618 | 0.566257 |
| Cyprus  | 2013 | 0.954078 | 0.588914 |
| Cyprus  | 2014 | 0.981005 | 0.618201 |
| Cyprus  | 2015 | 0.972019 | 0.633882 |
| Cyprus  | 2016 | 0.994398 | 0.701614 |
| Cyprus  | 2017 | 1.049295 | 0.817407 |
| Cyprus  | 2018 | 1.005187 | 0.80001  |
| Cyprus  | 2019 | 0.963696 | 0.782896 |
| Czechia | 1990 | 1.016176 | 0.624468 |
| Czechia | 1991 | 1.092255 | 0.665403 |
| Czechia | 1992 | 1.114824 | 0.676432 |
| Czechia | 1993 | 1.165005 | 0.705793 |
| Czechia | 1994 | 1.161923 | 0.705491 |
| Czechia | 1995 | 1.221828 | 0.746068 |
| Czechia | 1996 | 1.210004 | 0.738504 |
| Czechia | 1997 | 1.2386   | 0.75613  |
| Czechia | 1998 | 1.243416 | 0.755395 |
| Czechia | 1999 | 1.216241 | 0.737046 |
| Czechia | 2000 | 1.251442 | 0.756081 |
| Czechia | 2001 | 1.23813  | 0.748034 |
| Czechia | 2002 | 1.232174 | 0.737573 |
| Czechia | 2003 | 1.2408   | 0.740963 |
| Czechia | 2004 | 1.219882 | 0.723872 |
| Czechia | 2005 | 1.260818 | 0.743677 |



|                 |      |          |          |
|-----------------|------|----------|----------|
| Czechia         | 2006 | 1.263043 | 0.740681 |
| Czechia         | 2007 | 1.254411 | 0.738889 |
| Czechia         | 2008 | 1.2398   | 0.735183 |
| Czechia         | 2009 | 1.218698 | 0.726824 |
| Czechia         | 2010 | 1.206849 | 0.719868 |
| Czechia         | 2011 | 1.208496 | 0.722033 |
| Czechia         | 2012 | 1.210538 | 0.724006 |
| Czechia         | 2013 | 1.220183 | 0.728389 |
| Czechia         | 2014 | 1.220982 | 0.727287 |
| Czechia         | 2015 | 1.22085  | 0.726128 |
| Czechia         | 2016 | 1.216345 | 0.725895 |
| Czechia         | 2017 | 1.174381 | 0.703135 |
| Czechia         | 2018 | 1.163977 | 0.704178 |
| Czechia         | 2019 | 1.15844  | 0.708733 |
| C ɔ te d'Ivoire | 1990 | 0.608796 | 0.660555 |
| C ɔ te d'Ivoire | 1991 | 0.595623 | 0.644126 |
| C ɔ te d'Ivoire | 1992 | 0.578152 | 0.627977 |
| C ɔ te d'Ivoire | 1993 | 0.56919  | 0.618807 |
| C ɔ te d'Ivoire | 1994 | 0.557509 | 0.606066 |
| C ɔ te d'Ivoire | 1995 | 0.549824 | 0.596539 |
| C ɔ te d'Ivoire | 1996 | 0.548132 | 0.592989 |
| C ɔ te d'Ivoire | 1997 | 0.552384 | 0.594317 |
| C ɔ te d'Ivoire | 1998 | 0.559997 | 0.597753 |
| C ɔ te d'Ivoire | 1999 | 0.564649 | 0.599111 |
| C ɔ te d'Ivoire | 2000 | 0.571707 | 0.601928 |

|                                       |      |          |          |
|---------------------------------------|------|----------|----------|
| C 么 te d'Ivoire                       | 2001 | 0.585033 | 0.608489 |
| C 么 te d'Ivoire                       | 2002 | 0.595451 | 0.615232 |
| C 么 te d'Ivoire                       | 2003 | 0.602649 | 0.618669 |
| C 么 te d'Ivoire                       | 2004 | 0.604192 | 0.619534 |
| C 么 te d'Ivoire                       | 2005 | 0.613897 | 0.625708 |
| C 么 te d'Ivoire                       | 2006 | 0.622914 | 0.631968 |
| C 么 te d'Ivoire                       | 2007 | 0.625933 | 0.632453 |
| C 么 te d'Ivoire                       | 2008 | 0.630376 | 0.635391 |
| C 么 te d'Ivoire                       | 2009 | 0.632111 | 0.63704  |
| C 么 te d'Ivoire                       | 2010 | 0.629477 | 0.635272 |
| C 么 te d'Ivoire                       | 2011 | 0.627319 | 0.633461 |
| C 么 te d'Ivoire                       | 2012 | 0.625624 | 0.632268 |
| C 么 te d'Ivoire                       | 2013 | 0.623281 | 0.631079 |
| C 么 te d'Ivoire                       | 2014 | 0.62667  | 0.635978 |
| C 么 te d'Ivoire                       | 2015 | 0.631361 | 0.641248 |
| C 么 te d'Ivoire                       | 2016 | 0.635046 | 0.64627  |
| C 么 te d'Ivoire                       | 2017 | 0.637611 | 0.650224 |
| C 么 te d'Ivoire                       | 2018 | 0.641324 | 0.658071 |
| C 么 te d'Ivoire                       | 2019 | 0.643183 | 0.663257 |
| Democratic People's Republic of Korea | 1990 | 1.519679 | 0.93015  |
| Democratic People's Republic of Korea | 1991 | 1.517594 | 0.928075 |
| Democratic People's Republic of Korea | 1992 | 1.515332 | 0.925618 |
| Democratic People's Republic of Korea | 1993 | 1.511403 | 0.922131 |
| Democratic People's Republic of Korea | 1994 | 1.508383 | 0.918629 |
| Democratic People's Republic of Korea | 1995 | 1.50472  | 0.916326 |

1  
2  
3  
4  
5  
6  
7  
8  
9  
10  
11  
12  
13  
14  
15  
16  
17  
18  
19  
20  
21  
22  
23  
24  
25  
26  
27  
28  
29  
30  
31  
32  
33  
34  
35  
36  
37  
38  
39  
40  
41  
42  
43  
44  
45  
46

|                                       |      |          |          |
|---------------------------------------|------|----------|----------|
| Democratic People's Republic of Korea | 1996 | 1.499132 | 0.914125 |
| Democratic People's Republic of Korea | 1997 | 1.48746  | 0.907333 |
| Democratic People's Republic of Korea | 1998 | 1.47484  | 0.898221 |
| Democratic People's Republic of Korea | 1999 | 1.465112 | 0.889807 |
| Democratic People's Republic of Korea | 2000 | 1.457588 | 0.883    |
| Democratic People's Republic of Korea | 2001 | 1.449234 | 0.87407  |
| Democratic People's Republic of Korea | 2002 | 1.439481 | 0.863734 |
| Democratic People's Republic of Korea | 2003 | 1.428879 | 0.857005 |
| Democratic People's Republic of Korea | 2004 | 1.420628 | 0.85164  |
| Democratic People's Republic of Korea | 2005 | 1.413032 | 0.846354 |
| Democratic People's Republic of Korea | 2006 | 1.408239 | 0.843679 |
| Democratic People's Republic of Korea | 2007 | 1.404697 | 0.842011 |
| Democratic People's Republic of Korea | 2008 | 1.404365 | 0.842973 |
| Democratic People's Republic of Korea | 2009 | 1.405944 | 0.8431   |
| Democratic People's Republic of Korea | 2010 | 1.404803 | 0.841923 |
| Democratic People's Republic of Korea | 2011 | 1.398525 | 0.838881 |
| Democratic People's Republic of Korea | 2012 | 1.386802 | 0.833673 |
| Democratic People's Republic of Korea | 2013 | 1.371735 | 0.82762  |
| Democratic People's Republic of Korea | 2014 | 1.353179 | 0.81921  |
| Democratic People's Republic of Korea | 2015 | 1.335352 | 0.811898 |
| Democratic People's Republic of Korea | 2016 | 1.318845 | 0.806027 |
| Democratic People's Republic of Korea | 2017 | 1.307835 | 0.803468 |
| Democratic People's Republic of Korea | 2018 | 1.299564 | 0.802576 |
| Democratic People's Republic of Korea | 2019 | 1.295109 | 0.802939 |
| Democratic Republic of the Congo      | 1990 | 0.725667 | 0.623441 |

|                                  |      |          |          |
|----------------------------------|------|----------|----------|
| Democratic Republic of the Congo | 1991 | 0.740756 | 0.629281 |
| Democratic Republic of the Congo | 1992 | 0.75213  | 0.632608 |
| Democratic Republic of the Congo | 1993 | 0.766523 | 0.637728 |
| Democratic Republic of the Congo | 1994 | 0.77596  | 0.638698 |
| Democratic Republic of the Congo | 1995 | 0.783725 | 0.63836  |
| Democratic Republic of the Congo | 1996 | 0.809876 | 0.651945 |
| Democratic Republic of the Congo | 1997 | 0.808153 | 0.642786 |
| Democratic Republic of the Congo | 1998 | 0.825377 | 0.648066 |
| Democratic Republic of the Congo | 1999 | 0.839514 | 0.651081 |
| Democratic Republic of the Congo | 2000 | 0.857808 | 0.657211 |
| Democratic Republic of the Congo | 2001 | 0.880893 | 0.668343 |
| Democratic Republic of the Congo | 2002 | 0.900827 | 0.677205 |
| Democratic Republic of the Congo | 2003 | 0.915041 | 0.684614 |
| Democratic Republic of the Congo | 2004 | 0.928388 | 0.689952 |
| Democratic Republic of the Congo | 2005 | 0.935923 | 0.692857 |
| Democratic Republic of the Congo | 2006 | 0.938317 | 0.693584 |
| Democratic Republic of the Congo | 2007 | 0.934732 | 0.69219  |
| Democratic Republic of the Congo | 2008 | 0.927033 | 0.689089 |
| Democratic Republic of the Congo | 2009 | 0.92225  | 0.687671 |
| Democratic Republic of the Congo | 2010 | 0.913491 | 0.68321  |
| Democratic Republic of the Congo | 2011 | 0.903043 | 0.679241 |
| Democratic Republic of the Congo | 2012 | 0.896883 | 0.678318 |
| Democratic Republic of the Congo | 2013 | 0.889759 | 0.677695 |
| Democratic Republic of the Congo | 2014 | 0.884106 | 0.678253 |
| Democratic Republic of the Congo | 2015 | 0.885333 | 0.681047 |

|    |                                  |      |          |          |
|----|----------------------------------|------|----------|----------|
| 1  |                                  |      |          |          |
| 2  |                                  |      |          |          |
| 3  |                                  |      |          |          |
| 4  |                                  |      |          |          |
| 5  | Democratic Republic of the Congo | 2016 | 0.883509 | 0.685571 |
| 6  | Democratic Republic of the Congo | 2017 | 0.883648 | 0.690975 |
| 7  | Democratic Republic of the Congo | 2018 | 0.878558 | 0.693063 |
| 8  | Democratic Republic of the Congo | 2019 | 0.876196 | 0.69748  |
| 9  |                                  |      |          |          |
| 10 | Denmark                          | 1990 | 0.914828 | 0.580452 |
| 11 | Denmark                          | 1991 | 0.912012 | 0.572928 |
| 12 | Denmark                          | 1992 | 0.890685 | 0.554798 |
| 13 | Denmark                          | 1993 | 0.87468  | 0.544928 |
| 14 | Denmark                          | 1994 | 0.831742 | 0.522527 |
| 15 | Denmark                          | 1995 | 0.824691 | 0.520423 |
| 16 | Denmark                          | 1996 | 0.81649  | 0.514111 |
| 17 | Denmark                          | 1997 | 0.821561 | 0.517473 |
| 18 | Denmark                          | 1998 | 0.800373 | 0.502251 |
| 19 | Denmark                          | 1999 | 0.798478 | 0.504149 |
| 20 | Denmark                          | 2000 | 0.814684 | 0.504074 |
| 21 | Denmark                          | 2001 | 0.824117 | 0.502832 |
| 22 | Denmark                          | 2002 | 0.839073 | 0.506498 |
| 23 | Denmark                          | 2003 | 0.834985 | 0.501439 |
| 24 | Denmark                          | 2004 | 0.840014 | 0.504647 |
| 25 | Denmark                          | 2005 | 0.859294 | 0.51366  |
| 26 | Denmark                          | 2006 | 0.872854 | 0.519461 |
| 27 | Denmark                          | 2007 | 0.897032 | 0.531496 |
| 28 | Denmark                          | 2008 | 0.907035 | 0.535438 |
| 29 | Denmark                          | 2009 | 0.901804 | 0.534455 |
| 30 | Denmark                          | 2010 | 0.913237 | 0.543388 |
| 31 |                                  |      |          |          |
| 32 |                                  |      |          |          |
| 33 |                                  |      |          |          |
| 34 |                                  |      |          |          |
| 35 |                                  |      |          |          |
| 36 |                                  |      |          |          |
| 37 |                                  |      |          |          |
| 38 |                                  |      |          |          |
| 39 |                                  |      |          |          |
| 40 |                                  |      |          |          |
| 41 |                                  |      |          |          |
| 42 |                                  |      |          |          |
| 43 |                                  |      |          |          |
| 44 |                                  |      |          |          |
| 45 |                                  |      |          |          |
| 46 |                                  |      |          |          |

|          |      |          |          |
|----------|------|----------|----------|
| Denmark  | 2011 | 0.930847 | 0.55667  |
| Denmark  | 2012 | 0.925529 | 0.557666 |
| Denmark  | 2013 | 0.909819 | 0.55261  |
| Denmark  | 2014 | 0.911329 | 0.558367 |
| Denmark  | 2015 | 0.920682 | 0.572028 |
| Denmark  | 2016 | 0.891396 | 0.563705 |
| Denmark  | 2017 | 0.87517  | 0.562369 |
| Denmark  | 2018 | 0.856567 | 0.559299 |
| Denmark  | 2019 | 0.83897  | 0.555753 |
| Djibouti | 1990 | 0.63711  | 0.62949  |
| Djibouti | 1991 | 0.640369 | 0.623249 |
| Djibouti | 1992 | 0.633152 | 0.617298 |
| Djibouti | 1993 | 0.612619 | 0.606712 |
| Djibouti | 1994 | 0.606436 | 0.600977 |
| Djibouti | 1995 | 0.597126 | 0.597611 |
| Djibouti | 1996 | 0.591292 | 0.597983 |
| Djibouti | 1997 | 0.591939 | 0.603648 |
| Djibouti | 1998 | 0.589677 | 0.60793  |
| Djibouti | 1999 | 0.591275 | 0.614159 |
| Djibouti | 2000 | 0.589404 | 0.615726 |
| Djibouti | 2001 | 0.588645 | 0.619655 |
| Djibouti | 2002 | 0.588821 | 0.624743 |
| Djibouti | 2003 | 0.59524  | 0.632076 |
| Djibouti | 2004 | 0.600295 | 0.640742 |
| Djibouti | 2005 | 0.604165 | 0.646974 |

1  
2  
3  
4  
5  
6  
7  
8  
9  
10  
11  
12  
13  
14  
15  
16  
17  
18  
19  
20  
21  
22  
23  
24  
25  
26  
27  
28  
29  
30  
31  
32  
33  
34  
35  
36  
37  
38  
39  
40  
41  
42  
43  
44  
45  
46

|          |      |          |          |
|----------|------|----------|----------|
| Djibouti | 2006 | 0.607081 | 0.651123 |
| Djibouti | 2007 | 0.59813  | 0.646241 |
| Djibouti | 2008 | 0.592115 | 0.644566 |
| Djibouti | 2009 | 0.593195 | 0.649664 |
| Djibouti | 2010 | 0.596027 | 0.655453 |
| Djibouti | 2011 | 0.597782 | 0.661758 |
| Djibouti | 2012 | 0.601631 | 0.66921  |
| Djibouti | 2013 | 0.607341 | 0.678561 |
| Djibouti | 2014 | 0.609306 | 0.685456 |
| Djibouti | 2015 | 0.613572 | 0.691928 |
| Djibouti | 2016 | 0.616979 | 0.699061 |
| Djibouti | 2017 | 0.620938 | 0.707408 |
| Djibouti | 2018 | 0.622501 | 0.713307 |
| Djibouti | 2019 | 0.623897 | 0.718761 |
| Dominica | 1990 | 1.022575 | 0.68341  |
| Dominica | 1991 | 1.030748 | 0.681536 |
| Dominica | 1992 | 0.966633 | 0.635319 |
| Dominica | 1993 | 0.955614 | 0.621836 |
| Dominica | 1994 | 0.967154 | 0.623203 |
| Dominica | 1995 | 0.971693 | 0.621751 |
| Dominica | 1996 | 0.982772 | 0.625897 |
| Dominica | 1997 | 0.995791 | 0.633172 |
| Dominica | 1998 | 1.014203 | 0.645226 |
| Dominica | 1999 | 1.07042  | 0.681689 |
| Dominica | 2000 | 1.106362 | 0.706969 |

|                    |      |          |          |
|--------------------|------|----------|----------|
| Dominica           | 2001 | 1.133138 | 0.731554 |
| Dominica           | 2002 | 1.144745 | 0.752951 |
| Dominica           | 2003 | 1.130896 | 0.76167  |
| Dominica           | 2004 | 1.100279 | 0.756289 |
| Dominica           | 2005 | 1.098023 | 0.757618 |
| Dominica           | 2006 | 1.097205 | 0.766254 |
| Dominica           | 2007 | 1.086021 | 0.768361 |
| Dominica           | 2008 | 1.059714 | 0.765443 |
| Dominica           | 2009 | 1.039281 | 0.764358 |
| Dominica           | 2010 | 1.017251 | 0.762748 |
| Dominica           | 2011 | 1.00979  | 0.773488 |
| Dominica           | 2012 | 0.988291 | 0.776944 |
| Dominica           | 2013 | 0.972341 | 0.779038 |
| Dominica           | 2014 | 0.951066 | 0.776249 |
| Dominica           | 2015 | 0.929208 | 0.769479 |
| Dominica           | 2016 | 0.924913 | 0.775782 |
| Dominica           | 2017 | 0.916874 | 0.778058 |
| Dominica           | 2018 | 0.909062 | 0.779735 |
| Dominica           | 2019 | 0.902622 | 0.781262 |
| Dominican Republic | 1990 | 0.792257 | 0.775078 |
| Dominican Republic | 1991 | 0.813805 | 0.79193  |
| Dominican Republic | 1992 | 0.834425 | 0.808714 |
| Dominican Republic | 1993 | 0.867692 | 0.836164 |
| Dominican Republic | 1994 | 0.831727 | 0.799803 |
| Dominican Republic | 1995 | 0.788926 | 0.756014 |



|                    |      |          |          |
|--------------------|------|----------|----------|
| Dominican Republic | 1996 | 0.750525 | 0.710374 |
| Dominican Republic | 1997 | 0.727226 | 0.680711 |
| Dominican Republic | 1998 | 0.704717 | 0.653237 |
| Dominican Republic | 1999 | 0.655838 | 0.600255 |
| Dominican Republic | 2000 | 0.667709 | 0.608755 |
| Dominican Republic | 2001 | 0.683421 | 0.621056 |
| Dominican Republic | 2002 | 0.672707 | 0.608319 |
| Dominican Republic | 2003 | 0.688722 | 0.619241 |
| Dominican Republic | 2004 | 0.716078 | 0.641397 |
| Dominican Republic | 2005 | 0.748373 | 0.669059 |
| Dominican Republic | 2006 | 0.755305 | 0.675231 |
| Dominican Republic | 2007 | 0.762239 | 0.680346 |
| Dominican Republic | 2008 | 0.776457 | 0.691661 |
| Dominican Republic | 2009 | 0.795809 | 0.710386 |
| Dominican Republic | 2010 | 0.808009 | 0.727011 |
| Dominican Republic | 2011 | 0.795596 | 0.723439 |
| Dominican Republic | 2012 | 0.780869 | 0.71514  |
| Dominican Republic | 2013 | 0.77778  | 0.715245 |
| Dominican Republic | 2014 | 0.790124 | 0.729196 |
| Dominican Republic | 2015 | 0.802808 | 0.741573 |
| Dominican Republic | 2016 | 0.815963 | 0.755204 |
| Dominican Republic | 2017 | 0.835907 | 0.773302 |
| Dominican Republic | 2018 | 0.852982 | 0.787151 |
| Dominican Republic | 2019 | 0.867118 | 0.7988   |
| Ecuador            | 1990 | 1.004058 | 1.011805 |

|         |      |          |          |
|---------|------|----------|----------|
| Ecuador | 1991 | 0.968923 | 0.969688 |
| Ecuador | 1992 | 1.003831 | 0.998713 |
| Ecuador | 1993 | 0.991662 | 0.981519 |
| Ecuador | 1994 | 0.975175 | 0.96323  |
| Ecuador | 1995 | 0.969265 | 0.958788 |
| Ecuador | 1996 | 0.955254 | 0.945169 |
| Ecuador | 1997 | 0.963522 | 0.948701 |
| Ecuador | 1998 | 0.952234 | 0.929045 |
| Ecuador | 1999 | 0.923097 | 0.898357 |
| Ecuador | 2000 | 0.945688 | 0.918728 |
| Ecuador | 2001 | 0.850152 | 0.82902  |
| Ecuador | 2002 | 0.961827 | 0.929527 |
| Ecuador | 2003 | 1.002522 | 0.961998 |
| Ecuador | 2004 | 0.951695 | 0.910259 |
| Ecuador | 2005 | 0.933601 | 0.891627 |
| Ecuador | 2006 | 0.935124 | 0.891747 |
| Ecuador | 2007 | 0.923045 | 0.875347 |
| Ecuador | 2008 | 0.908829 | 0.848903 |
| Ecuador | 2009 | 0.909745 | 0.838831 |
| Ecuador | 2010 | 0.905887 | 0.830621 |
| Ecuador | 2011 | 0.872038 | 0.795452 |
| Ecuador | 2012 | 0.948539 | 0.857824 |
| Ecuador | 2013 | 0.954923 | 0.857567 |
| Ecuador | 2014 | 0.945461 | 0.846159 |
| Ecuador | 2015 | 0.933084 | 0.834753 |

1  
2  
3  
4  
5  
6  
7  
8  
9  
10  
11  
12  
13  
14  
15  
16  
17  
18  
19  
20  
21  
22  
23  
24  
25  
26  
27  
28  
29  
30  
31  
32  
33  
34  
35  
36  
37  
38  
39  
40  
41  
42  
43  
44  
45  
46

|         |      |          |          |
|---------|------|----------|----------|
| Ecuador | 2016 | 0.940996 | 0.838891 |
| Ecuador | 2017 | 0.946693 | 0.839503 |
| Ecuador | 2018 | 0.958062 | 0.848115 |
| Ecuador | 2019 | 0.982864 | 0.871573 |
| Egypt   | 1990 | 1.352837 | 1.300901 |
| Egypt   | 1991 | 1.345168 | 1.317427 |
| Egypt   | 1992 | 1.356801 | 1.35033  |
| Egypt   | 1993 | 1.359543 | 1.369332 |
| Egypt   | 1994 | 1.336761 | 1.356111 |
| Egypt   | 1995 | 1.314426 | 1.347094 |
| Egypt   | 1996 | 1.356722 | 1.410277 |
| Egypt   | 1997 | 1.367379 | 1.441698 |
| Egypt   | 1998 | 1.367158 | 1.459711 |
| Egypt   | 1999 | 1.357297 | 1.482505 |
| Egypt   | 2000 | 1.355486 | 1.547564 |
| Egypt   | 2001 | 1.340398 | 1.572534 |
| Egypt   | 2002 | 1.300644 | 1.537725 |
| Egypt   | 2003 | 1.241502 | 1.444409 |
| Egypt   | 2004 | 1.231767 | 1.42514  |
| Egypt   | 2005 | 1.259757 | 1.48129  |
| Egypt   | 2006 | 1.273849 | 1.56127  |
| Egypt   | 2007 | 1.241724 | 1.559132 |
| Egypt   | 2008 | 1.2281   | 1.558302 |
| Egypt   | 2009 | 1.221783 | 1.566194 |
| Egypt   | 2010 | 1.223014 | 1.588974 |

|             |      |          |          |
|-------------|------|----------|----------|
| Egypt       | 2011 | 1.166152 | 1.543971 |
| Egypt       | 2012 | 1.181251 | 1.56277  |
| Egypt       | 2013 | 1.128811 | 1.5249   |
| Egypt       | 2014 | 1.142337 | 1.587852 |
| Egypt       | 2015 | 1.165619 | 1.642986 |
| Egypt       | 2016 | 1.160821 | 1.652987 |
| Egypt       | 2017 | 1.148174 | 1.63138  |
| Egypt       | 2018 | 1.137364 | 1.622527 |
| Egypt       | 2019 | 1.124721 | 1.598394 |
| El Salvador | 1990 | 0.73088  | 0.628185 |
| El Salvador | 1991 | 0.70667  | 0.605372 |
| El Salvador | 1992 | 0.706118 | 0.602843 |
| El Salvador | 1993 | 0.690439 | 0.588379 |
| El Salvador | 1994 | 0.691847 | 0.586128 |
| El Salvador | 1995 | 0.625846 | 0.525309 |
| El Salvador | 1996 | 0.678738 | 0.566622 |
| El Salvador | 1997 | 0.642916 | 0.534002 |
| El Salvador | 1998 | 0.567219 | 0.466982 |
| El Salvador | 1999 | 0.592851 | 0.484268 |
| El Salvador | 2000 | 0.547509 | 0.443736 |
| El Salvador | 2001 | 0.570958 | 0.459772 |
| El Salvador | 2002 | 0.57284  | 0.458034 |
| El Salvador | 2003 | 0.540174 | 0.428803 |
| El Salvador | 2004 | 0.519341 | 0.408988 |
| El Salvador | 2005 | 0.506918 | 0.396288 |

1  
2  
3  
4  
5  
6  
7  
8  
9  
10  
11  
12  
13  
14  
15  
16  
17  
18  
19  
20  
21  
22  
23  
24  
25  
26  
27  
28  
29  
30  
31  
32  
33  
34  
35  
36  
37  
38  
39  
40  
41  
42  
43  
44  
45  
46

|                   |      |          |          |
|-------------------|------|----------|----------|
| El Salvador       | 2006 | 0.491691 | 0.381601 |
| El Salvador       | 2007 | 0.506517 | 0.390121 |
| El Salvador       | 2008 | 0.5161   | 0.394159 |
| El Salvador       | 2009 | 0.523686 | 0.396446 |
| El Salvador       | 2010 | 0.551921 | 0.415391 |
| El Salvador       | 2011 | 0.554047 | 0.414798 |
| El Salvador       | 2012 | 0.581725 | 0.432742 |
| El Salvador       | 2013 | 0.60464  | 0.447815 |
| El Salvador       | 2014 | 0.563794 | 0.416177 |
| El Salvador       | 2015 | 0.565509 | 0.415662 |
| El Salvador       | 2016 | 0.560112 | 0.409023 |
| El Salvador       | 2017 | 0.573525 | 0.415772 |
| El Salvador       | 2018 | 0.589898 | 0.425152 |
| El Salvador       | 2019 | 0.588189 | 0.420935 |
| Equatorial Guinea | 1990 | 0.633973 | 0.475046 |
| Equatorial Guinea | 1991 | 0.643732 | 0.476437 |
| Equatorial Guinea | 1992 | 0.648953 | 0.474689 |
| Equatorial Guinea | 1993 | 0.667183 | 0.482076 |
| Equatorial Guinea | 1994 | 0.685891 | 0.489868 |
| Equatorial Guinea | 1995 | 0.695666 | 0.493196 |
| Equatorial Guinea | 1996 | 0.719499 | 0.505742 |
| Equatorial Guinea | 1997 | 0.726417 | 0.506651 |
| Equatorial Guinea | 1998 | 0.743037 | 0.514358 |
| Equatorial Guinea | 1999 | 0.75764  | 0.522421 |
| Equatorial Guinea | 2000 | 0.771162 | 0.530608 |

|                   |      |          |          |
|-------------------|------|----------|----------|
| Equatorial Guinea | 2001 | 0.78625  | 0.541806 |
| Equatorial Guinea | 2002 | 0.813222 | 0.560839 |
| Equatorial Guinea | 2003 | 0.844645 | 0.586309 |
| Equatorial Guinea | 2004 | 0.864957 | 0.605754 |
| Equatorial Guinea | 2005 | 0.883082 | 0.624017 |
| Equatorial Guinea | 2006 | 0.89857  | 0.641249 |
| Equatorial Guinea | 2007 | 0.903298 | 0.651933 |
| Equatorial Guinea | 2008 | 0.921692 | 0.668859 |
| Equatorial Guinea | 2009 | 0.937131 | 0.689382 |
| Equatorial Guinea | 2010 | 0.954428 | 0.707902 |
| Equatorial Guinea | 2011 | 0.94896  | 0.713287 |
| Equatorial Guinea | 2012 | 0.934341 | 0.710454 |
| Equatorial Guinea | 2013 | 0.911668 | 0.701174 |
| Equatorial Guinea | 2014 | 0.904311 | 0.702942 |
| Equatorial Guinea | 2015 | 0.913769 | 0.712517 |
| Equatorial Guinea | 2016 | 0.908977 | 0.71704  |
| Equatorial Guinea | 2017 | 0.899726 | 0.715847 |
| Equatorial Guinea | 2018 | 0.895166 | 0.716091 |
| Equatorial Guinea | 2019 | 0.892762 | 0.716859 |
| Eritrea           | 1990 | 0.677516 | 0.486014 |
| Eritrea           | 1991 | 0.66837  | 0.481683 |
| Eritrea           | 1992 | 0.653672 | 0.476384 |
| Eritrea           | 1993 | 0.635299 | 0.468895 |
| Eritrea           | 1994 | 0.617765 | 0.463212 |
| Eritrea           | 1995 | 0.585629 | 0.44997  |

1  
2  
3  
4  
5  
6  
7  
8  
9  
10  
11  
12  
13  
14  
15  
16  
17  
18  
19  
20  
21  
22  
23  
24  
25  
26  
27  
28  
29  
30  
31  
32  
33  
34  
35  
36  
37  
38  
39  
40  
41  
42  
43  
44  
45  
46

|         |      |          |          |
|---------|------|----------|----------|
| Eritrea | 1996 | 0.592799 | 0.455702 |
| Eritrea | 1997 | 0.604464 | 0.46541  |
| Eritrea | 1998 | 0.622404 | 0.477271 |
| Eritrea | 1999 | 0.635233 | 0.488692 |
| Eritrea | 2000 | 0.652666 | 0.502612 |
| Eritrea | 2001 | 0.672426 | 0.51557  |
| Eritrea | 2002 | 0.682087 | 0.528655 |
| Eritrea | 2003 | 0.696141 | 0.540144 |
| Eritrea | 2004 | 0.706811 | 0.548242 |
| Eritrea | 2005 | 0.717387 | 0.555826 |
| Eritrea | 2006 | 0.721666 | 0.559545 |
| Eritrea | 2007 | 0.726562 | 0.563659 |
| Eritrea | 2008 | 0.729562 | 0.567179 |
| Eritrea | 2009 | 0.733471 | 0.571313 |
| Eritrea | 2010 | 0.736993 | 0.57369  |
| Eritrea | 2011 | 0.747012 | 0.581633 |
| Eritrea | 2012 | 0.75857  | 0.592977 |
| Eritrea | 2013 | 0.770296 | 0.603493 |
| Eritrea | 2014 | 0.780923 | 0.612417 |
| Eritrea | 2015 | 0.787631 | 0.620088 |
| Eritrea | 2016 | 0.794511 | 0.628143 |
| Eritrea | 2017 | 0.800615 | 0.636744 |
| Eritrea | 2018 | 0.801815 | 0.641395 |
| Eritrea | 2019 | 0.803849 | 0.647501 |
| Estonia | 1990 | 1.274667 | 0.544356 |

|         |      |          |          |
|---------|------|----------|----------|
| Estonia | 1991 | 1.290002 | 0.556613 |
| Estonia | 1992 | 1.239721 | 0.541388 |
| Estonia | 1993 | 1.200974 | 0.542798 |
| Estonia | 1994 | 1.151173 | 0.550592 |
| Estonia | 1995 | 1.128166 | 0.54486  |
| Estonia | 1996 | 1.176935 | 0.562217 |
| Estonia | 1997 | 1.14876  | 0.552321 |
| Estonia | 1998 | 1.1261   | 0.544524 |
| Estonia | 1999 | 1.166972 | 0.555235 |
| Estonia | 2000 | 1.255561 | 0.597795 |
| Estonia | 2001 | 1.252541 | 0.599208 |
| Estonia | 2002 | 1.205019 | 0.568907 |
| Estonia | 2003 | 1.249495 | 0.580201 |
| Estonia | 2004 | 1.197993 | 0.548705 |
| Estonia | 2005 | 1.175965 | 0.531529 |
| Estonia | 2006 | 1.137999 | 0.513165 |
| Estonia | 2007 | 1.110521 | 0.499568 |
| Estonia | 2008 | 1.187032 | 0.526966 |
| Estonia | 2009 | 1.18254  | 0.520329 |
| Estonia | 2010 | 1.25962  | 0.543306 |
| Estonia | 2011 | 1.367921 | 0.587629 |
| Estonia | 2012 | 1.43354  | 0.605071 |
| Estonia | 2013 | 1.638015 | 0.678218 |
| Estonia | 2014 | 1.681019 | 0.688145 |
| Estonia | 2015 | 1.90245  | 0.76673  |



1  
2  
3  
4  
5  
6  
7  
8  
9  
10  
11  
12  
13  
14  
15  
16  
17  
18  
19  
20  
21  
22  
23  
24  
25  
26  
27  
28  
29  
30  
31  
32  
33  
34  
35  
36  
37  
38  
39  
40  
41  
42  
43  
44  
45  
46

|          |      |          |          |
|----------|------|----------|----------|
| Estonia  | 2016 | 1.966618 | 0.787203 |
| Estonia  | 2017 | 1.978323 | 0.797514 |
| Estonia  | 2018 | 1.945837 | 0.792401 |
| Estonia  | 2019 | 1.91689  | 0.789282 |
| Eswatini | 1990 | 0.643432 | 0.445885 |
| Eswatini | 1991 | 0.655902 | 0.454929 |
| Eswatini | 1992 | 0.663034 | 0.459787 |
| Eswatini | 1993 | 0.659477 | 0.458163 |
| Eswatini | 1994 | 0.641934 | 0.450227 |
| Eswatini | 1995 | 0.629765 | 0.446376 |
| Eswatini | 1996 | 0.592986 | 0.428342 |
| Eswatini | 1997 | 0.575288 | 0.419633 |
| Eswatini | 1998 | 0.56769  | 0.418709 |
| Eswatini | 1999 | 0.58138  | 0.430021 |
| Eswatini | 2000 | 0.615204 | 0.455989 |
| Eswatini | 2001 | 0.622836 | 0.464538 |
| Eswatini | 2002 | 0.648366 | 0.482734 |
| Eswatini | 2003 | 0.645587 | 0.482052 |
| Eswatini | 2004 | 0.637776 | 0.475359 |
| Eswatini | 2005 | 0.637936 | 0.473051 |
| Eswatini | 2006 | 0.619484 | 0.459317 |
| Eswatini | 2007 | 0.596666 | 0.442398 |
| Eswatini | 2008 | 0.56799  | 0.420904 |
| Eswatini | 2009 | 0.549777 | 0.405457 |
| Eswatini | 2010 | 0.532729 | 0.390103 |

|    |          |      |          |          |
|----|----------|------|----------|----------|
| 1  |          |      |          |          |
| 2  |          |      |          |          |
| 3  |          |      |          |          |
| 4  |          |      |          |          |
| 5  | Eswatini | 2011 | 0.519468 | 0.377501 |
| 6  | Eswatini | 2012 | 0.512695 | 0.369766 |
| 7  | Eswatini | 2013 | 0.511534 | 0.36584  |
| 8  | Eswatini | 2014 | 0.513582 | 0.364059 |
| 9  | Eswatini | 2015 | 0.512443 | 0.360656 |
| 10 | Eswatini | 2016 | 0.510467 | 0.35706  |
| 11 | Eswatini | 2017 | 0.514681 | 0.357329 |
| 12 | Eswatini | 2018 | 0.519338 | 0.357931 |
| 13 | Eswatini | 2019 | 0.524167 | 0.358968 |
| 14 | Ethiopia | 1990 | 0.720756 | 0.703844 |
| 15 | Ethiopia | 1991 | 0.715509 | 0.706314 |
| 16 | Ethiopia | 1992 | 0.718831 | 0.717897 |
| 17 | Ethiopia | 1993 | 0.720067 | 0.728498 |
| 18 | Ethiopia | 1994 | 0.721361 | 0.73772  |
| 19 | Ethiopia | 1995 | 0.720699 | 0.743548 |
| 20 | Ethiopia | 1996 | 0.720125 | 0.749094 |
| 21 | Ethiopia | 1997 | 0.718258 | 0.753969 |
| 22 | Ethiopia | 1998 | 0.724515 | 0.767056 |
| 23 | Ethiopia | 1999 | 0.728246 | 0.775891 |
| 24 | Ethiopia | 2000 | 0.71538  | 0.766805 |
| 25 | Ethiopia | 2001 | 0.705973 | 0.758366 |
| 26 | Ethiopia | 2002 | 0.699858 | 0.754009 |
| 27 | Ethiopia | 2003 | 0.692711 | 0.749821 |
| 28 | Ethiopia | 2004 | 0.689158 | 0.749999 |
| 29 | Ethiopia | 2005 | 0.690604 | 0.752846 |
| 30 |          |      |          |          |
| 31 |          |      |          |          |
| 32 |          |      |          |          |
| 33 |          |      |          |          |
| 34 |          |      |          |          |
| 35 |          |      |          |          |
| 36 |          |      |          |          |
| 37 |          |      |          |          |
| 38 |          |      |          |          |
| 39 |          |      |          |          |
| 40 |          |      |          |          |
| 41 |          |      |          |          |
| 42 |          |      |          |          |
| 43 |          |      |          |          |
| 44 |          |      |          |          |
| 45 |          |      |          |          |
| 46 |          |      |          |          |

1  
2  
3  
4  
5  
6  
7  
8  
9  
10  
11  
12  
13  
14  
15  
16  
17  
18  
19  
20  
21  
22  
23  
24  
25  
26  
27  
28  
29  
30  
31  
32  
33  
34  
35  
36  
37  
38  
39  
40  
41  
42  
43  
44  
45  
46

|          |      |          |          |
|----------|------|----------|----------|
| Ethiopia | 2006 | 0.682452 | 0.745788 |
| Ethiopia | 2007 | 0.671544 | 0.734216 |
| Ethiopia | 2008 | 0.659778 | 0.722532 |
| Ethiopia | 2009 | 0.65182  | 0.715305 |
| Ethiopia | 2010 | 0.643618 | 0.708825 |
| Ethiopia | 2011 | 0.641285 | 0.705564 |
| Ethiopia | 2012 | 0.633994 | 0.697198 |
| Ethiopia | 2013 | 0.62824  | 0.691475 |
| Ethiopia | 2014 | 0.626243 | 0.687038 |
| Ethiopia | 2015 | 0.625936 | 0.68562  |
| Ethiopia | 2016 | 0.629331 | 0.686995 |
| Ethiopia | 2017 | 0.638242 | 0.693243 |
| Ethiopia | 2018 | 0.645523 | 0.699145 |
| Ethiopia | 2019 | 0.651966 | 0.705008 |
| Fiji     | 1990 | 0.73655  | 0.628208 |
| Fiji     | 1991 | 0.723556 | 0.608009 |
| Fiji     | 1992 | 0.714756 | 0.592527 |
| Fiji     | 1993 | 0.705691 | 0.578871 |
| Fiji     | 1994 | 0.69546  | 0.563871 |
| Fiji     | 1995 | 0.691654 | 0.557138 |
| Fiji     | 1996 | 0.700723 | 0.561307 |
| Fiji     | 1997 | 0.704771 | 0.562422 |
| Fiji     | 1998 | 0.706182 | 0.563969 |
| Fiji     | 1999 | 0.687221 | 0.548343 |
| Fiji     | 2000 | 0.689676 | 0.54438  |

|         |      |          |          |
|---------|------|----------|----------|
| Fiji    | 2001 | 0.674743 | 0.523954 |
| Fiji    | 2002 | 0.714503 | 0.533768 |
| Fiji    | 2003 | 0.766211 | 0.56517  |
| Fiji    | 2004 | 0.772718 | 0.564366 |
| Fiji    | 2005 | 0.738173 | 0.546633 |
| Fiji    | 2006 | 0.729158 | 0.534349 |
| Fiji    | 2007 | 0.744471 | 0.528667 |
| Fiji    | 2008 | 0.779592 | 0.571697 |
| Fiji    | 2009 | 0.799191 | 0.589837 |
| Fiji    | 2010 | 0.774052 | 0.569211 |
| Fiji    | 2011 | 0.744256 | 0.551047 |
| Fiji    | 2012 | 0.721319 | 0.541473 |
| Fiji    | 2013 | 0.719478 | 0.54105  |
| Fiji    | 2014 | 0.721526 | 0.53809  |
| Fiji    | 2015 | 0.728084 | 0.540392 |
| Fiji    | 2016 | 0.734806 | 0.543516 |
| Fiji    | 2017 | 0.741654 | 0.545391 |
| Fiji    | 2018 | 0.748133 | 0.547693 |
| Fiji    | 2019 | 0.754193 | 0.549577 |
| Finland | 1990 | 1.369762 | 0.651588 |
| Finland | 1991 | 1.404089 | 0.664806 |
| Finland | 1992 | 1.447397 | 0.683359 |
| Finland | 1993 | 1.473253 | 0.693502 |
| Finland | 1994 | 1.479108 | 0.699452 |
| Finland | 1995 | 1.437902 | 0.685172 |

|    |         |      |          |          |
|----|---------|------|----------|----------|
| 1  |         |      |          |          |
| 2  |         |      |          |          |
| 3  |         |      |          |          |
| 4  |         |      |          |          |
| 5  | Finland | 1996 | 1.4051   | 0.675676 |
| 6  | Finland | 1997 | 1.369332 | 0.663419 |
| 7  | Finland | 1998 | 1.273109 | 0.620794 |
| 8  | Finland | 1999 | 1.23956  | 0.605483 |
| 9  | Finland | 2000 | 1.255896 | 0.613356 |
| 10 | Finland | 2001 | 1.225525 | 0.599665 |
| 11 | Finland | 2002 | 1.211362 | 0.593411 |
| 12 | Finland | 2003 | 1.235058 | 0.606439 |
| 13 | Finland | 2004 | 1.240611 | 0.615839 |
| 14 | Finland | 2005 | 1.268837 | 0.630773 |
| 15 | Finland | 2006 | 1.315871 | 0.655994 |
| 16 | Finland | 2007 | 1.334793 | 0.667858 |
| 17 | Finland | 2008 | 1.346856 | 0.675729 |
| 18 | Finland | 2009 | 1.349785 | 0.681902 |
| 19 | Finland | 2010 | 1.368822 | 0.693519 |
| 20 | Finland | 2011 | 1.41426  | 0.719419 |
| 21 | Finland | 2012 | 1.442101 | 0.737073 |
| 22 | Finland | 2013 | 1.456253 | 0.75094  |
| 23 | Finland | 2014 | 1.463376 | 0.761748 |
| 24 | Finland | 2015 | 1.504316 | 0.790889 |
| 25 | Finland | 2016 | 1.486986 | 0.792614 |
| 26 | Finland | 2017 | 1.435595 | 0.779339 |
| 27 | Finland | 2018 | 1.41599  | 0.781929 |
| 28 | Finland | 2019 | 1.386159 | 0.777876 |
| 29 | France  | 1990 | 1.124202 | 0.523527 |
| 30 |         |      |          |          |
| 31 |         |      |          |          |
| 32 |         |      |          |          |
| 33 |         |      |          |          |
| 34 |         |      |          |          |
| 35 |         |      |          |          |
| 36 |         |      |          |          |
| 37 |         |      |          |          |
| 38 |         |      |          |          |
| 39 |         |      |          |          |
| 40 |         |      |          |          |
| 41 |         |      |          |          |
| 42 |         |      |          |          |
| 43 |         |      |          |          |
| 44 |         |      |          |          |
| 45 |         |      |          |          |
| 46 |         |      |          |          |

|    |        |      |          |          |
|----|--------|------|----------|----------|
| 1  |        |      |          |          |
| 2  |        |      |          |          |
| 3  |        |      |          |          |
| 4  |        |      |          |          |
| 5  | France | 1991 | 1.122316 | 0.524504 |
| 6  | France | 1992 | 1.12034  | 0.524787 |
| 7  | France | 1993 | 1.117802 | 0.526191 |
| 8  | France | 1994 | 1.118268 | 0.528797 |
| 9  | France | 1995 | 1.112993 | 0.527024 |
| 10 | France | 1996 | 1.101909 | 0.522307 |
| 11 | France | 1997 | 1.105504 | 0.522596 |
| 12 | France | 1998 | 1.107177 | 0.530535 |
| 13 | France | 1999 | 1.10903  | 0.534938 |
| 14 | France | 2000 | 1.107854 | 0.537168 |
| 15 | France | 2001 | 1.110105 | 0.543565 |
| 16 | France | 2002 | 1.102    | 0.545481 |
| 17 | France | 2003 | 1.084393 | 0.542172 |
| 18 | France | 2004 | 1.077414 | 0.54228  |
| 19 | France | 2005 | 1.06193  | 0.535116 |
| 20 | France | 2006 | 1.067723 | 0.539183 |
| 21 | France | 2007 | 1.075779 | 0.545688 |
| 22 | France | 2008 | 1.090466 | 0.555471 |
| 23 | France | 2009 | 1.07957  | 0.551918 |
| 24 | France | 2010 | 1.086085 | 0.553398 |
| 25 | France | 2011 | 1.095191 | 0.55705  |
| 26 | France | 2012 | 1.104754 | 0.562202 |
| 27 | France | 2013 | 1.102879 | 0.564467 |
| 28 | France | 2014 | 1.10743  | 0.570799 |
| 29 | France | 2015 | 1.089102 | 0.563704 |
| 30 |        |      |          |          |
| 31 |        |      |          |          |
| 32 |        |      |          |          |
| 33 |        |      |          |          |
| 34 |        |      |          |          |
| 35 |        |      |          |          |
| 36 |        |      |          |          |
| 37 |        |      |          |          |
| 38 |        |      |          |          |
| 39 |        |      |          |          |
| 40 |        |      |          |          |
| 41 |        |      |          |          |
| 42 |        |      |          |          |
| 43 |        |      |          |          |
| 44 |        |      |          |          |
| 45 |        |      |          |          |
| 46 |        |      |          |          |

1  
2  
3  
4  
5  
6  
7  
8  
9  
10  
11  
12  
13  
14  
15  
16  
17  
18  
19  
20  
21  
22  
23  
24  
25  
26  
27  
28  
29  
30  
31  
32  
33  
34  
35  
36  
37  
38  
39  
40  
41  
42  
43  
44  
45  
46

|        |      |          |          |
|--------|------|----------|----------|
| France | 2016 | 1.076047 | 0.555978 |
| France | 2017 | 1.062053 | 0.548646 |
| France | 2018 | 1.078987 | 0.558974 |
| France | 2019 | 1.072237 | 0.558669 |
| Gabon  | 1990 | 0.663018 | 0.510695 |
| Gabon  | 1991 | 0.671655 | 0.519702 |
| Gabon  | 1992 | 0.671388 | 0.52192  |
| Gabon  | 1993 | 0.685336 | 0.532449 |
| Gabon  | 1994 | 0.707166 | 0.549661 |
| Gabon  | 1995 | 0.711069 | 0.555824 |
| Gabon  | 1996 | 0.747609 | 0.582971 |
| Gabon  | 1997 | 0.769173 | 0.598567 |
| Gabon  | 1998 | 0.796265 | 0.617671 |
| Gabon  | 1999 | 0.831864 | 0.641644 |
| Gabon  | 2000 | 0.848369 | 0.653986 |
| Gabon  | 2001 | 0.876541 | 0.676621 |
| Gabon  | 2002 | 0.887885 | 0.685029 |
| Gabon  | 2003 | 0.917659 | 0.709144 |
| Gabon  | 2004 | 0.940511 | 0.72639  |
| Gabon  | 2005 | 0.941471 | 0.727273 |
| Gabon  | 2006 | 0.957229 | 0.739157 |
| Gabon  | 2007 | 0.939534 | 0.730543 |
| Gabon  | 2008 | 0.943992 | 0.736346 |
| Gabon  | 2009 | 0.937137 | 0.731371 |
| Gabon  | 2010 | 0.928266 | 0.72189  |

|        |      |          |          |
|--------|------|----------|----------|
| Gabon  | 2011 | 0.931747 | 0.725053 |
| Gabon  | 2012 | 0.920242 | 0.718091 |
| Gabon  | 2013 | 0.907997 | 0.709801 |
| Gabon  | 2014 | 0.913089 | 0.712937 |
| Gabon  | 2015 | 0.921649 | 0.71807  |
| Gabon  | 2016 | 0.920729 | 0.721385 |
| Gabon  | 2017 | 0.921713 | 0.725495 |
| Gabon  | 2018 | 0.922917 | 0.729617 |
| Gabon  | 2019 | 0.923103 | 0.73276  |
| Gambia | 1990 | 0.755805 | 0.755747 |
| Gambia | 1991 | 0.756823 | 0.756088 |
| Gambia | 1992 | 0.758184 | 0.75924  |
| Gambia | 1993 | 0.758936 | 0.757261 |
| Gambia | 1994 | 0.755326 | 0.750572 |
| Gambia | 1995 | 0.753686 | 0.753222 |
| Gambia | 1996 | 0.751364 | 0.743599 |
| Gambia | 1997 | 0.749738 | 0.739091 |
| Gambia | 1998 | 0.750354 | 0.73916  |
| Gambia | 1999 | 0.743484 | 0.732456 |
| Gambia | 2000 | 0.74646  | 0.72468  |
| Gambia | 2001 | 0.746679 | 0.717698 |
| Gambia | 2002 | 0.747766 | 0.711503 |
| Gambia | 2003 | 0.752355 | 0.712861 |
| Gambia | 2004 | 0.755842 | 0.713817 |
| Gambia | 2005 | 0.755955 | 0.71042  |



|         |      |          |          |
|---------|------|----------|----------|
| Gambia  | 2006 | 0.757416 | 0.705952 |
| Gambia  | 2007 | 0.75523  | 0.700773 |
| Gambia  | 2008 | 0.754458 | 0.692666 |
| Gambia  | 2009 | 0.752537 | 0.689476 |
| Gambia  | 2010 | 0.753068 | 0.686471 |
| Gambia  | 2011 | 0.755772 | 0.679598 |
| Gambia  | 2012 | 0.759236 | 0.680795 |
| Gambia  | 2013 | 0.756697 | 0.679521 |
| Gambia  | 2014 | 0.763619 | 0.690755 |
| Gambia  | 2015 | 0.769482 | 0.692325 |
| Gambia  | 2016 | 0.773885 | 0.699811 |
| Gambia  | 2017 | 0.778738 | 0.706126 |
| Gambia  | 2018 | 0.781179 | 0.70658  |
| Gambia  | 2019 | 0.783745 | 0.708702 |
| Georgia | 1990 | 0.890262 | 0.542133 |
| Georgia | 1991 | 0.872831 | 0.536789 |
| Georgia | 1992 | 0.850246 | 0.525619 |
| Georgia | 1993 | 0.863035 | 0.531854 |
| Georgia | 1994 | 0.862277 | 0.535854 |
| Georgia | 1995 | 0.840688 | 0.527101 |
| Georgia | 1996 | 0.842497 | 0.532042 |
| Georgia | 1997 | 0.82724  | 0.521857 |
| Georgia | 1998 | 0.793438 | 0.501139 |
| Georgia | 1999 | 0.801938 | 0.500857 |
| Georgia | 2000 | 0.879865 | 0.543389 |

|         |      |          |          |
|---------|------|----------|----------|
| Georgia | 2001 | 0.899387 | 0.565607 |
| Georgia | 2002 | 0.884306 | 0.551759 |
| Georgia | 2003 | 0.910865 | 0.563177 |
| Georgia | 2004 | 0.933848 | 0.577696 |
| Georgia | 2005 | 0.978952 | 0.607314 |
| Georgia | 2006 | 0.962763 | 0.605212 |
| Georgia | 2007 | 0.930799 | 0.599638 |
| Georgia | 2008 | 0.915016 | 0.592516 |
| Georgia | 2009 | 0.943313 | 0.605152 |
| Georgia | 2010 | 0.947623 | 0.596383 |
| Georgia | 2011 | 0.95614  | 0.599604 |
| Georgia | 2012 | 0.978096 | 0.606573 |
| Georgia | 2013 | 1.014494 | 0.623579 |
| Georgia | 2014 | 0.991503 | 0.604425 |
| Georgia | 2015 | 0.965315 | 0.584449 |
| Georgia | 2016 | 0.950849 | 0.575343 |
| Georgia | 2017 | 0.947486 | 0.573143 |
| Georgia | 2018 | 0.940168 | 0.571439 |
| Georgia | 2019 | 0.93624  | 0.569532 |
| Germany | 1990 | 1.487969 | 0.738576 |
| Germany | 1991 | 1.466275 | 0.722103 |
| Germany | 1992 | 1.461023 | 0.715904 |
| Germany | 1993 | 1.449296 | 0.70554  |
| Germany | 1994 | 1.444447 | 0.697681 |
| Germany | 1995 | 1.444922 | 0.689009 |

|         |      |          |          |
|---------|------|----------|----------|
| Germany | 1996 | 1.453565 | 0.686347 |
| Germany | 1997 | 1.483836 | 0.696893 |
| Germany | 1998 | 1.514594 | 0.710752 |
| Germany | 1999 | 1.533725 | 0.718637 |
| Germany | 2000 | 1.553591 | 0.722254 |
| Germany | 2001 | 1.573124 | 0.730431 |
| Germany | 2002 | 1.582824 | 0.736649 |
| Germany | 2003 | 1.574148 | 0.73842  |
| Germany | 2004 | 1.599898 | 0.756378 |
| Germany | 2005 | 1.612897 | 0.768233 |
| Germany | 2006 | 1.602888 | 0.772032 |
| Germany | 2007 | 1.593446 | 0.782936 |
| Germany | 2008 | 1.578264 | 0.792426 |
| Germany | 2009 | 1.556308 | 0.796146 |
| Germany | 2010 | 1.52725  | 0.787571 |
| Germany | 2011 | 1.537922 | 0.783764 |
| Germany | 2012 | 1.527116 | 0.781158 |
| Germany | 2013 | 1.517234 | 0.781468 |
| Germany | 2014 | 1.517122 | 0.78274  |
| Germany | 2015 | 1.509834 | 0.785566 |
| Germany | 2016 | 1.518061 | 0.798449 |
| Germany | 2017 | 1.476666 | 0.804041 |
| Germany | 2018 | 1.444126 | 0.80565  |
| Germany | 2019 | 1.416778 | 0.808654 |
| Ghana   | 1990 | 1.389388 | 1.181071 |

|       |      |          |          |
|-------|------|----------|----------|
| Ghana | 1991 | 1.395297 | 1.186086 |
| Ghana | 1992 | 1.406856 | 1.198388 |
| Ghana | 1993 | 1.408088 | 1.203505 |
| Ghana | 1994 | 1.396314 | 1.196408 |
| Ghana | 1995 | 1.382803 | 1.186929 |
| Ghana | 1996 | 1.372057 | 1.179342 |
| Ghana | 1997 | 1.34008  | 1.155532 |
| Ghana | 1998 | 1.304774 | 1.127515 |
| Ghana | 1999 | 1.250913 | 1.082697 |
| Ghana | 2000 | 1.228704 | 1.061556 |
| Ghana | 2001 | 1.221506 | 1.049951 |
| Ghana | 2002 | 1.201741 | 1.027726 |
| Ghana | 2003 | 1.174967 | 1.001459 |
| Ghana | 2004 | 1.13319  | 0.962102 |
| Ghana | 2005 | 1.104291 | 0.932732 |
| Ghana | 2006 | 1.079481 | 0.906283 |
| Ghana | 2007 | 1.070195 | 0.892958 |
| Ghana | 2008 | 1.057559 | 0.875779 |
| Ghana | 2009 | 1.052341 | 0.864954 |
| Ghana | 2010 | 1.05498  | 0.860277 |
| Ghana | 2011 | 1.049814 | 0.85044  |
| Ghana | 2012 | 1.043791 | 0.839396 |
| Ghana | 2013 | 1.043172 | 0.832323 |
| Ghana | 2014 | 1.057851 | 0.837805 |
| Ghana | 2015 | 1.068515 | 0.839101 |

|        |      |          |          |
|--------|------|----------|----------|
| Ghana  | 2016 | 1.087431 | 0.848637 |
| Ghana  | 2017 | 1.108864 | 0.860005 |
| Ghana  | 2018 | 1.125883 | 0.868676 |
| Ghana  | 2019 | 1.142967 | 0.877856 |
| Greece | 1990 | 1.161016 | 0.870098 |
| Greece | 1991 | 1.167773 | 0.882825 |
| Greece | 1992 | 1.161076 | 0.883274 |
| Greece | 1993 | 1.161909 | 0.888873 |
| Greece | 1994 | 1.167579 | 0.899013 |
| Greece | 1995 | 1.161049 | 0.897684 |
| Greece | 1996 | 1.147164 | 0.891019 |
| Greece | 1997 | 1.144252 | 0.892744 |
| Greece | 1998 | 1.149091 | 0.900029 |
| Greece | 1999 | 1.119722 | 0.880614 |
| Greece | 2000 | 1.101564 | 0.871094 |
| Greece | 2001 | 1.115135 | 0.886731 |
| Greece | 2002 | 1.140613 | 0.916072 |
| Greece | 2003 | 1.15732  | 0.940811 |
| Greece | 2004 | 1.159749 | 0.955428 |
| Greece | 2005 | 1.163923 | 0.972318 |
| Greece | 2006 | 1.182637 | 0.993248 |
| Greece | 2007 | 1.175831 | 0.97592  |
| Greece | 2008 | 1.190464 | 0.969062 |
| Greece | 2009 | 1.153453 | 0.941996 |
| Greece | 2010 | 1.136643 | 0.928388 |

|    |           |      |          |          |
|----|-----------|------|----------|----------|
| 1  |           |      |          |          |
| 2  |           |      |          |          |
| 3  |           |      |          |          |
| 4  |           |      |          |          |
| 5  | Greece    | 2011 | 1.105891 | 0.892206 |
| 6  | Greece    | 2012 | 1.086592 | 0.867041 |
| 7  | Greece    | 2013 | 1.079777 | 0.850836 |
| 8  | Greece    | 2014 | 1.04619  | 0.814348 |
| 9  | Greece    | 2015 | 1.030625 | 0.789385 |
| 10 | Greece    | 2016 | 1.028167 | 0.775855 |
| 11 | Greece    | 2017 | 1.037304 | 0.773643 |
| 12 | Greece    | 2018 | 1.091329 | 0.802598 |
| 13 | Greece    | 2019 | 1.105053 | 0.80773  |
| 14 | Greenland | 1990 | 0.849346 | 0.693694 |
| 15 | Greenland | 1991 | 0.859043 | 0.699506 |
| 16 | Greenland | 1992 | 0.874645 | 0.708875 |
| 17 | Greenland | 1993 | 1.013236 | 0.83206  |
| 18 | Greenland | 1994 | 1.037787 | 0.873406 |
| 19 | Greenland | 1995 | 1.033608 | 0.886208 |
| 20 | Greenland | 1996 | 1.060839 | 0.925261 |
| 21 | Greenland | 1997 | 1.091328 | 0.971297 |
| 22 | Greenland | 1998 | 1.046899 | 0.961443 |
| 23 | Greenland | 1999 | 0.997845 | 0.942449 |
| 24 | Greenland | 2000 | 0.94211  | 0.901702 |
| 25 | Greenland | 2001 | 0.936488 | 0.907813 |
| 26 | Greenland | 2002 | 0.927296 | 0.904154 |
| 27 | Greenland | 2003 | 0.835465 | 0.819147 |
| 28 | Greenland | 2004 | 0.69175  | 0.688599 |
| 29 | Greenland | 2005 | 0.709612 | 0.700803 |
| 30 |           |      |          |          |
| 31 |           |      |          |          |
| 32 |           |      |          |          |
| 33 |           |      |          |          |
| 34 |           |      |          |          |
| 35 |           |      |          |          |
| 36 |           |      |          |          |
| 37 |           |      |          |          |
| 38 |           |      |          |          |
| 39 |           |      |          |          |
| 40 |           |      |          |          |
| 41 |           |      |          |          |
| 42 |           |      |          |          |
| 43 |           |      |          |          |
| 44 |           |      |          |          |
| 45 |           |      |          |          |
| 46 |           |      |          |          |

|           |      |          |          |
|-----------|------|----------|----------|
| Greenland | 2006 | 0.706598 | 0.692802 |
| Greenland | 2007 | 0.705793 | 0.686308 |
| Greenland | 2008 | 0.700539 | 0.680087 |
| Greenland | 2009 | 0.683503 | 0.668978 |
| Greenland | 2010 | 0.672699 | 0.652435 |
| Greenland | 2011 | 0.660619 | 0.635534 |
| Greenland | 2012 | 0.635943 | 0.609095 |
| Greenland | 2013 | 0.625224 | 0.595312 |
| Greenland | 2014 | 0.621571 | 0.594696 |
| Greenland | 2015 | 0.622625 | 0.590524 |
| Greenland | 2016 | 0.63024  | 0.59461  |
| Greenland | 2017 | 0.631927 | 0.596305 |
| Greenland | 2018 | 0.636475 | 0.598319 |
| Greenland | 2019 | 0.633015 | 0.600239 |
| Grenada   | 1990 | 0.797821 | 0.554947 |
| Grenada   | 1991 | 0.791908 | 0.547582 |
| Grenada   | 1992 | 0.797965 | 0.545611 |
| Grenada   | 1993 | 0.866844 | 0.585903 |
| Grenada   | 1994 | 0.868726 | 0.585653 |
| Grenada   | 1995 | 0.866269 | 0.584739 |
| Grenada   | 1996 | 0.831677 | 0.564078 |
| Grenada   | 1997 | 0.811707 | 0.552665 |
| Grenada   | 1998 | 0.799312 | 0.544226 |
| Grenada   | 1999 | 0.688282 | 0.455645 |
| Grenada   | 2000 | 0.68774  | 0.439827 |

|         |      |          |          |
|---------|------|----------|----------|
| Grenada | 2001 | 0.702495 | 0.43759  |
| Grenada | 2002 | 0.711655 | 0.432377 |
| Grenada | 2003 | 0.71962  | 0.428494 |
| Grenada | 2004 | 0.732755 | 0.430247 |
| Grenada | 2005 | 0.760413 | 0.437206 |
| Grenada | 2006 | 0.78936  | 0.443967 |
| Grenada | 2007 | 0.822661 | 0.462776 |
| Grenada | 2008 | 0.842693 | 0.483301 |
| Grenada | 2009 | 0.882412 | 0.508339 |
| Grenada | 2010 | 0.903844 | 0.527307 |
| Grenada | 2011 | 0.928404 | 0.573847 |
| Grenada | 2012 | 1.001204 | 0.718206 |
| Grenada | 2013 | 0.981917 | 0.7194   |
| Grenada | 2014 | 0.951772 | 0.711073 |
| Grenada | 2015 | 0.919374 | 0.703207 |
| Grenada | 2016 | 0.859129 | 0.659112 |
| Grenada | 2017 | 0.835568 | 0.652602 |
| Grenada | 2018 | 0.826236 | 0.657412 |
| Grenada | 2019 | 0.810856 | 0.655619 |
| Guam    | 1990 | 1.204419 | 1.189679 |
| Guam    | 1991 | 1.208766 | 1.188058 |
| Guam    | 1992 | 1.195287 | 1.167342 |
| Guam    | 1993 | 1.16717  | 1.105228 |
| Guam    | 1994 | 1.107875 | 1.004316 |
| Guam    | 1995 | 1.172072 | 1.084015 |



1  
2  
3  
4  
5  
6  
7  
8  
9  
10  
11  
12  
13  
14  
15  
16  
17  
18  
19  
20  
21  
22  
23  
24  
25  
26  
27  
28  
29  
30  
31  
32  
33  
34  
35  
36  
37  
38  
39  
40  
41  
42  
43  
44  
45  
46

|           |      |          |          |
|-----------|------|----------|----------|
| Guam      | 1996 | 1.186921 | 1.127987 |
| Guam      | 1997 | 1.133647 | 1.085355 |
| Guam      | 1998 | 1.1296   | 1.075936 |
| Guam      | 1999 | 1.158874 | 1.091652 |
| Guam      | 2000 | 1.174389 | 1.100938 |
| Guam      | 2001 | 1.203948 | 1.136096 |
| Guam      | 2002 | 1.200842 | 1.132682 |
| Guam      | 2003 | 1.238955 | 1.160038 |
| Guam      | 2004 | 1.113806 | 1.021279 |
| Guam      | 2005 | 0.964523 | 0.850896 |
| Guam      | 2006 | 0.944381 | 0.819772 |
| Guam      | 2007 | 0.929106 | 0.797947 |
| Guam      | 2008 | 0.923572 | 0.78604  |
| Guam      | 2009 | 0.931624 | 0.788499 |
| Guam      | 2010 | 0.940753 | 0.797387 |
| Guam      | 2011 | 0.956968 | 0.812158 |
| Guam      | 2012 | 0.983131 | 0.836726 |
| Guam      | 2013 | 1.004146 | 0.860112 |
| Guam      | 2014 | 1.001106 | 0.863148 |
| Guam      | 2015 | 1.003953 | 0.86564  |
| Guam      | 2016 | 0.994553 | 0.85511  |
| Guam      | 2017 | 1.009881 | 0.866865 |
| Guam      | 2018 | 1.025338 | 0.885139 |
| Guam      | 2019 | 1.062923 | 0.918484 |
| Guatemala | 1990 | 0.953023 | 0.953895 |

|           |      |          |          |
|-----------|------|----------|----------|
| Guatemala | 1991 | 0.933729 | 0.929254 |
| Guatemala | 1992 | 0.92926  | 0.918512 |
| Guatemala | 1993 | 0.914013 | 0.90221  |
| Guatemala | 1994 | 0.896312 | 0.885135 |
| Guatemala | 1995 | 0.890006 | 0.871973 |
| Guatemala | 1996 | 0.901921 | 0.86863  |
| Guatemala | 1997 | 0.899852 | 0.857182 |
| Guatemala | 1998 | 0.872046 | 0.812846 |
| Guatemala | 1999 | 0.865173 | 0.791137 |
| Guatemala | 2000 | 0.863256 | 0.781043 |
| Guatemala | 2001 | 0.820782 | 0.743524 |
| Guatemala | 2002 | 0.83644  | 0.740421 |
| Guatemala | 2003 | 0.84415  | 0.738636 |
| Guatemala | 2004 | 0.843046 | 0.720606 |
| Guatemala | 2005 | 0.838576 | 0.707155 |
| Guatemala | 2006 | 0.856915 | 0.71003  |
| Guatemala | 2007 | 0.868494 | 0.712748 |
| Guatemala | 2008 | 0.88503  | 0.714982 |
| Guatemala | 2009 | 0.910003 | 0.728899 |
| Guatemala | 2010 | 0.930968 | 0.739534 |
| Guatemala | 2011 | 0.943079 | 0.746912 |
| Guatemala | 2012 | 0.956022 | 0.754441 |
| Guatemala | 2013 | 0.95592  | 0.752758 |
| Guatemala | 2014 | 0.970023 | 0.757865 |
| Guatemala | 2015 | 0.969041 | 0.752183 |

1  
2  
3  
4  
5  
6  
7  
8  
9  
10  
11  
12  
13  
14  
15  
16  
17  
18  
19  
20  
21  
22  
23  
24  
25  
26  
27  
28  
29  
30  
31  
32  
33  
34  
35  
36  
37  
38  
39  
40  
41  
42  
43  
44  
45  
46

|               |      |          |          |
|---------------|------|----------|----------|
| Guatemala     | 2016 | 0.983854 | 0.758866 |
| Guatemala     | 2017 | 0.994562 | 0.768067 |
| Guatemala     | 2018 | 0.99077  | 0.763013 |
| Guatemala     | 2019 | 0.995586 | 0.764309 |
| Guinea-Bissau | 1990 | 0.748122 | 0.670412 |
| Guinea-Bissau | 1991 | 0.75664  | 0.671111 |
| Guinea-Bissau | 1992 | 0.764453 | 0.671795 |
| Guinea-Bissau | 1993 | 0.770896 | 0.671429 |
| Guinea-Bissau | 1994 | 0.775841 | 0.67024  |
| Guinea-Bissau | 1995 | 0.778009 | 0.667293 |
| Guinea-Bissau | 1996 | 0.781511 | 0.664792 |
| Guinea-Bissau | 1997 | 0.784534 | 0.662213 |
| Guinea-Bissau | 1998 | 0.781983 | 0.655103 |
| Guinea-Bissau | 1999 | 0.773202 | 0.643304 |
| Guinea-Bissau | 2000 | 0.774928 | 0.639101 |
| Guinea-Bissau | 2001 | 0.769671 | 0.63055  |
| Guinea-Bissau | 2002 | 0.776817 | 0.632411 |
| Guinea-Bissau | 2003 | 0.783424 | 0.634572 |
| Guinea-Bissau | 2004 | 0.781804 | 0.630986 |
| Guinea-Bissau | 2005 | 0.777461 | 0.625183 |
| Guinea-Bissau | 2006 | 0.785814 | 0.629214 |
| Guinea-Bissau | 2007 | 0.790956 | 0.63183  |
| Guinea-Bissau | 2008 | 0.789619 | 0.630173 |
| Guinea-Bissau | 2009 | 0.791031 | 0.630407 |
| Guinea-Bissau | 2010 | 0.788492 | 0.627204 |

|               |      |          |          |
|---------------|------|----------|----------|
| Guinea-Bissau | 2011 | 0.780258 | 0.621232 |
| Guinea-Bissau | 2012 | 0.77979  | 0.621828 |
| Guinea-Bissau | 2013 | 0.775523 | 0.619504 |
| Guinea-Bissau | 2014 | 0.781231 | 0.623934 |
| Guinea-Bissau | 2015 | 0.785211 | 0.627208 |
| Guinea-Bissau | 2016 | 0.790123 | 0.632173 |
| Guinea-Bissau | 2017 | 0.794982 | 0.636694 |
| Guinea-Bissau | 2018 | 0.794557 | 0.636869 |
| Guinea-Bissau | 2019 | 0.79691  | 0.639962 |
| Guinea        | 1990 | 1.106482 | 1.06805  |
| Guinea        | 1991 | 1.101821 | 1.062402 |
| Guinea        | 1992 | 1.092566 | 1.051668 |
| Guinea        | 1993 | 1.079614 | 1.036735 |
| Guinea        | 1994 | 1.063496 | 1.018359 |
| Guinea        | 1995 | 1.044157 | 0.994427 |
| Guinea        | 1996 | 1.023563 | 0.970226 |
| Guinea        | 1997 | 1.003974 | 0.94782  |
| Guinea        | 1998 | 0.984752 | 0.924564 |
| Guinea        | 1999 | 0.959149 | 0.894479 |
| Guinea        | 2000 | 0.948271 | 0.875656 |
| Guinea        | 2001 | 0.93673  | 0.86105  |
| Guinea        | 2002 | 0.926789 | 0.848561 |
| Guinea        | 2003 | 0.921873 | 0.840532 |
| Guinea        | 2004 | 0.914807 | 0.83004  |
| Guinea        | 2005 | 0.909379 | 0.821056 |

|        |      |          |          |
|--------|------|----------|----------|
| Guinea | 2006 | 0.897855 | 0.809873 |
| Guinea | 2007 | 0.88313  | 0.797058 |
| Guinea | 2008 | 0.8682   | 0.784253 |
| Guinea | 2009 | 0.856308 | 0.774402 |
| Guinea | 2010 | 0.844945 | 0.765219 |
| Guinea | 2011 | 0.838392 | 0.761209 |
| Guinea | 2012 | 0.832401 | 0.75916  |
| Guinea | 2013 | 0.825926 | 0.757267 |
| Guinea | 2014 | 0.825605 | 0.761087 |
| Guinea | 2015 | 0.827532 | 0.766111 |
| Guinea | 2016 | 0.830462 | 0.774096 |
| Guinea | 2017 | 0.833695 | 0.783024 |
| Guinea | 2018 | 0.834033 | 0.789338 |
| Guinea | 2019 | 0.836231 | 0.796133 |
| Guyana | 1990 | 0.804795 | 0.730845 |
| Guyana | 1991 | 0.825743 | 0.745172 |
| Guyana | 1992 | 0.815942 | 0.730925 |
| Guyana | 1993 | 0.815344 | 0.715393 |
| Guyana | 1994 | 0.833385 | 0.730953 |
| Guyana | 1995 | 0.82273  | 0.725093 |
| Guyana | 1996 | 0.826799 | 0.72395  |
| Guyana | 1997 | 0.801758 | 0.710721 |
| Guyana | 1998 | 0.804478 | 0.710939 |
| Guyana | 1999 | 0.816289 | 0.717467 |
| Guyana | 2000 | 0.851078 | 0.75824  |

|        |      |          |          |
|--------|------|----------|----------|
| Guyana | 2001 | 0.856085 | 0.770243 |
| Guyana | 2002 | 0.868114 | 0.792286 |
| Guyana | 2003 | 0.88199  | 0.808553 |
| Guyana | 2004 | 0.881747 | 0.805175 |
| Guyana | 2005 | 0.876973 | 0.799695 |
| Guyana | 2006 | 0.86259  | 0.785305 |
| Guyana | 2007 | 0.871755 | 0.796174 |
| Guyana | 2008 | 0.866064 | 0.79292  |
| Guyana | 2009 | 0.856384 | 0.776095 |
| Guyana | 2010 | 0.870928 | 0.791752 |
| Guyana | 2011 | 0.864618 | 0.787339 |
| Guyana | 2012 | 0.858249 | 0.769835 |
| Guyana | 2013 | 0.868019 | 0.754845 |
| Guyana | 2014 | 0.883459 | 0.756936 |
| Guyana | 2015 | 0.904528 | 0.783773 |
| Guyana | 2016 | 0.909773 | 0.785122 |
| Guyana | 2017 | 0.907778 | 0.779852 |
| Guyana | 2018 | 0.916706 | 0.792253 |
| Guyana | 2019 | 0.917252 | 0.792395 |
| Haiti  | 1990 | 0.848252 | 0.694669 |
| Haiti  | 1991 | 0.851834 | 0.699622 |
| Haiti  | 1992 | 0.858366 | 0.705985 |
| Haiti  | 1993 | 0.868323 | 0.715498 |
| Haiti  | 1994 | 0.889488 | 0.733226 |
| Haiti  | 1995 | 0.884666 | 0.730909 |

|          |      |          |          |
|----------|------|----------|----------|
| Haiti    | 1996 | 0.885902 | 0.73329  |
| Haiti    | 1997 | 0.88977  | 0.737561 |
| Haiti    | 1998 | 0.897728 | 0.746391 |
| Haiti    | 1999 | 0.918178 | 0.763662 |
| Haiti    | 2000 | 0.933843 | 0.777576 |
| Haiti    | 2001 | 0.952387 | 0.793799 |
| Haiti    | 2002 | 0.965378 | 0.805915 |
| Haiti    | 2003 | 0.979128 | 0.818581 |
| Haiti    | 2004 | 0.996137 | 0.833853 |
| Haiti    | 2005 | 1.011615 | 0.848181 |
| Haiti    | 2006 | 1.003287 | 0.843106 |
| Haiti    | 2007 | 0.991817 | 0.835123 |
| Haiti    | 2008 | 0.977956 | 0.825209 |
| Haiti    | 2009 | 0.969319 | 0.818318 |
| Haiti    | 2010 | 0.971384 | 0.814256 |
| Haiti    | 2011 | 0.977353 | 0.812342 |
| Haiti    | 2012 | 0.970589 | 0.807299 |
| Haiti    | 2013 | 0.964412 | 0.801409 |
| Haiti    | 2014 | 0.961933 | 0.797931 |
| Haiti    | 2015 | 0.961316 | 0.795943 |
| Haiti    | 2016 | 0.958705 | 0.793089 |
| Haiti    | 2017 | 0.953425 | 0.7883   |
| Haiti    | 2018 | 0.949688 | 0.78419  |
| Haiti    | 2019 | 0.950462 | 0.784143 |
| Honduras | 1990 | 0.931423 | 0.792876 |

|          |      |          |          |
|----------|------|----------|----------|
| Honduras | 1991 | 0.893526 | 0.757388 |
| Honduras | 1992 | 0.98682  | 0.839842 |
| Honduras | 1993 | 0.96852  | 0.824803 |
| Honduras | 1994 | 0.959285 | 0.818048 |
| Honduras | 1995 | 1.132512 | 0.982388 |
| Honduras | 1996 | 1.204171 | 1.080562 |
| Honduras | 1997 | 1.196654 | 1.084657 |
| Honduras | 1998 | 1.188782 | 1.087144 |
| Honduras | 1999 | 1.177838 | 1.086961 |
| Honduras | 2000 | 1.167179 | 1.085797 |
| Honduras | 2001 | 1.166044 | 1.09074  |
| Honduras | 2002 | 1.190753 | 1.118393 |
| Honduras | 2003 | 1.220312 | 1.149288 |
| Honduras | 2004 | 1.21409  | 1.147758 |
| Honduras | 2005 | 1.210856 | 1.145859 |
| Honduras | 2006 | 1.206554 | 1.142104 |
| Honduras | 2007 | 1.201772 | 1.137077 |
| Honduras | 2008 | 1.193002 | 1.129034 |
| Honduras | 2009 | 1.17622  | 1.114785 |
| Honduras | 2010 | 1.158652 | 1.099057 |
| Honduras | 2011 | 1.132415 | 1.071005 |
| Honduras | 2012 | 1.049605 | 0.966428 |
| Honduras | 2013 | 1.061289 | 0.964852 |
| Honduras | 2014 | 1.072882 | 0.964053 |
| Honduras | 2015 | 1.084842 | 0.9635   |



1  
2  
3  
4  
5  
6  
7  
8  
9  
10  
11  
12  
13  
14  
15  
16  
17  
18  
19  
20  
21  
22  
23  
24  
25  
26  
27  
28  
29  
30  
31  
32  
33  
34  
35  
36  
37  
38  
39  
40  
41  
42  
43  
44  
45  
46

|          |      |          |          |
|----------|------|----------|----------|
| Honduras | 2016 | 1.097255 | 0.964191 |
| Honduras | 2017 | 1.113633 | 0.969835 |
| Honduras | 2018 | 1.133398 | 0.979179 |
| Honduras | 2019 | 1.150707 | 0.987235 |
| Hungary  | 1990 | 1.248905 | 0.783216 |
| Hungary  | 1991 | 1.273197 | 0.788897 |
| Hungary  | 1992 | 1.235009 | 0.764683 |
| Hungary  | 1993 | 1.231176 | 0.75623  |
| Hungary  | 1994 | 1.207315 | 0.733594 |
| Hungary  | 1995 | 1.224856 | 0.735564 |
| Hungary  | 1996 | 1.257931 | 0.743862 |
| Hungary  | 1997 | 1.308379 | 0.767016 |
| Hungary  | 1998 | 1.328475 | 0.772198 |
| Hungary  | 1999 | 1.338323 | 0.77329  |
| Hungary  | 2000 | 1.35984  | 0.776331 |
| Hungary  | 2001 | 1.359909 | 0.773614 |
| Hungary  | 2002 | 1.345923 | 0.763105 |
| Hungary  | 2003 | 1.355023 | 0.763996 |
| Hungary  | 2004 | 1.373922 | 0.770584 |
| Hungary  | 2005 | 1.367215 | 0.760508 |
| Hungary  | 2006 | 1.414381 | 0.777394 |
| Hungary  | 2007 | 1.476528 | 0.803333 |
| Hungary  | 2008 | 1.536635 | 0.823527 |
| Hungary  | 2009 | 1.559169 | 0.826695 |
| Hungary  | 2010 | 1.632679 | 0.854821 |

|         |      |          |          |
|---------|------|----------|----------|
| Hungary | 2011 | 1.687514 | 0.88035  |
| Hungary | 2012 | 1.701139 | 0.882161 |
| Hungary | 2013 | 1.757902 | 0.906339 |
| Hungary | 2014 | 1.755502 | 0.906485 |
| Hungary | 2015 | 1.78418  | 0.922637 |
| Hungary | 2016 | 1.735478 | 0.893355 |
| Hungary | 2017 | 1.75693  | 0.901822 |
| Hungary | 2018 | 1.744163 | 0.896852 |
| Hungary | 2019 | 1.776262 | 0.914186 |
| Iceland | 1990 | 0.893067 | 0.617346 |
| Iceland | 1991 | 0.898833 | 0.619624 |
| Iceland | 1992 | 0.904815 | 0.624484 |
| Iceland | 1993 | 0.906251 | 0.624472 |
| Iceland | 1994 | 0.900378 | 0.620242 |
| Iceland | 1995 | 0.886218 | 0.609419 |
| Iceland | 1996 | 0.865607 | 0.592359 |
| Iceland | 1997 | 0.86581  | 0.590292 |
| Iceland | 1998 | 0.87148  | 0.58898  |
| Iceland | 1999 | 0.88968  | 0.596646 |
| Iceland | 2000 | 0.939133 | 0.627518 |
| Iceland | 2001 | 0.946968 | 0.636139 |
| Iceland | 2002 | 0.918585 | 0.619865 |
| Iceland | 2003 | 0.932633 | 0.628488 |
| Iceland | 2004 | 0.943794 | 0.63412  |
| Iceland | 2005 | 0.920771 | 0.620702 |

1  
2  
3  
4  
5  
6  
7  
8  
9  
10  
11  
12  
13  
14  
15  
16  
17  
18  
19  
20  
21  
22  
23  
24  
25  
26  
27  
28  
29  
30  
31  
32  
33  
34  
35  
36  
37  
38  
39  
40  
41  
42  
43  
44  
45  
46

|         |      |          |          |
|---------|------|----------|----------|
| Iceland | 2006 | 0.875513 | 0.592684 |
| Iceland | 2007 | 0.828134 | 0.560027 |
| Iceland | 2008 | 0.813439 | 0.547711 |
| Iceland | 2009 | 0.797623 | 0.532781 |
| Iceland | 2010 | 0.792424 | 0.527124 |
| Iceland | 2011 | 0.797199 | 0.526861 |
| Iceland | 2012 | 0.781397 | 0.512562 |
| Iceland | 2013 | 0.816639 | 0.53432  |
| Iceland | 2014 | 0.891672 | 0.581795 |
| Iceland | 2015 | 0.868086 | 0.571245 |
| Iceland | 2016 | 0.841589 | 0.554825 |
| Iceland | 2017 | 0.799747 | 0.529264 |
| Iceland | 2018 | 0.791315 | 0.524633 |
| Iceland | 2019 | 0.793979 | 0.527376 |
| India   | 1990 | 0.67198  | 0.651392 |
| India   | 1991 | 0.664991 | 0.649046 |
| India   | 1992 | 0.677239 | 0.659893 |
| India   | 1993 | 0.668435 | 0.653609 |
| India   | 1994 | 0.664197 | 0.64799  |
| India   | 1995 | 0.665584 | 0.647018 |
| India   | 1996 | 0.664089 | 0.640755 |
| India   | 1997 | 0.665254 | 0.640588 |
| India   | 1998 | 0.672932 | 0.647828 |
| India   | 1999 | 0.667927 | 0.643606 |
| India   | 2000 | 0.650053 | 0.62195  |

|    |           |      |          |          |
|----|-----------|------|----------|----------|
| 1  |           |      |          |          |
| 2  |           |      |          |          |
| 3  |           |      |          |          |
| 4  |           |      |          |          |
| 5  | India     | 2001 | 0.648807 | 0.6203   |
| 6  | India     | 2002 | 0.645959 | 0.616526 |
| 7  | India     | 2003 | 0.627599 | 0.596667 |
| 8  | India     | 2004 | 0.61961  | 0.587071 |
| 9  | India     | 2005 | 0.617428 | 0.584254 |
| 10 | India     | 2006 | 0.621215 | 0.591136 |
| 11 | India     | 2007 | 0.62422  | 0.595923 |
| 12 | India     | 2008 | 0.614686 | 0.585389 |
| 13 | India     | 2009 | 0.615543 | 0.579393 |
| 14 | India     | 2010 | 0.627674 | 0.58403  |
| 15 | India     | 2011 | 0.631651 | 0.587956 |
| 16 | India     | 2012 | 0.643951 | 0.600207 |
| 17 | India     | 2013 | 0.668672 | 0.612078 |
| 18 | India     | 2014 | 0.697766 | 0.627543 |
| 19 | India     | 2015 | 0.726946 | 0.655171 |
| 20 | India     | 2016 | 0.727723 | 0.661042 |
| 21 | India     | 2017 | 0.728097 | 0.663525 |
| 22 | India     | 2018 | 0.72818  | 0.659649 |
| 23 | India     | 2019 | 0.732114 | 0.664084 |
| 24 | Indonesia | 1990 | 0.904475 | 0.805626 |
| 25 | Indonesia | 1991 | 0.89592  | 0.79993  |
| 26 | Indonesia | 1992 | 0.891139 | 0.796224 |
| 27 | Indonesia | 1993 | 0.896197 | 0.800503 |
| 28 | Indonesia | 1994 | 0.901232 | 0.804676 |
| 29 | Indonesia | 1995 | 0.910442 | 0.812309 |
| 30 |           |      |          |          |
| 31 |           |      |          |          |
| 32 |           |      |          |          |
| 33 |           |      |          |          |
| 34 |           |      |          |          |
| 35 |           |      |          |          |
| 36 |           |      |          |          |
| 37 |           |      |          |          |
| 38 |           |      |          |          |
| 39 |           |      |          |          |
| 40 |           |      |          |          |
| 41 |           |      |          |          |
| 42 |           |      |          |          |
| 43 |           |      |          |          |
| 44 |           |      |          |          |
| 45 |           |      |          |          |
| 46 |           |      |          |          |

|                            |      |          |          |
|----------------------------|------|----------|----------|
| Indonesia                  | 1996 | 0.920734 | 0.822294 |
| Indonesia                  | 1997 | 0.925581 | 0.826452 |
| Indonesia                  | 1998 | 0.926823 | 0.827526 |
| Indonesia                  | 1999 | 0.927296 | 0.82819  |
| Indonesia                  | 2000 | 0.921737 | 0.824503 |
| Indonesia                  | 2001 | 0.909081 | 0.815638 |
| Indonesia                  | 2002 | 0.901911 | 0.810925 |
| Indonesia                  | 2003 | 0.900123 | 0.810677 |
| Indonesia                  | 2004 | 0.895603 | 0.807667 |
| Indonesia                  | 2005 | 0.891928 | 0.804423 |
| Indonesia                  | 2006 | 0.887582 | 0.802247 |
| Indonesia                  | 2007 | 0.88547  | 0.801573 |
| Indonesia                  | 2008 | 0.871184 | 0.787266 |
| Indonesia                  | 2009 | 0.857157 | 0.773813 |
| Indonesia                  | 2010 | 0.84432  | 0.761141 |
| Indonesia                  | 2011 | 0.825542 | 0.744336 |
| Indonesia                  | 2012 | 0.794104 | 0.715721 |
| Indonesia                  | 2013 | 0.771454 | 0.694276 |
| Indonesia                  | 2014 | 0.746281 | 0.67051  |
| Indonesia                  | 2015 | 0.731324 | 0.656279 |
| Indonesia                  | 2016 | 0.726472 | 0.653465 |
| Indonesia                  | 2017 | 0.727428 | 0.654714 |
| Indonesia                  | 2018 | 0.726543 | 0.654163 |
| Indonesia                  | 2019 | 0.725323 | 0.653072 |
| Iran (Islamic Republic of) | 1990 | 0.846309 | 0.884767 |

|                            |      |          |          |
|----------------------------|------|----------|----------|
| Iran (Islamic Republic of) | 1991 | 0.850062 | 0.895933 |
| Iran (Islamic Republic of) | 1992 | 0.845513 | 0.897431 |
| Iran (Islamic Republic of) | 1993 | 0.850854 | 0.909371 |
| Iran (Islamic Republic of) | 1994 | 0.846549 | 0.911123 |
| Iran (Islamic Republic of) | 1995 | 0.850514 | 0.921504 |
| Iran (Islamic Republic of) | 1996 | 0.865414 | 0.943133 |
| Iran (Islamic Republic of) | 1997 | 0.868181 | 0.951728 |
| Iran (Islamic Republic of) | 1998 | 0.872144 | 0.960851 |
| Iran (Islamic Republic of) | 1999 | 0.866475 | 0.958325 |
| Iran (Islamic Republic of) | 2000 | 0.887477 | 0.985288 |
| Iran (Islamic Republic of) | 2001 | 0.899208 | 1.00184  |
| Iran (Islamic Republic of) | 2002 | 0.886266 | 0.98971  |
| Iran (Islamic Republic of) | 2003 | 0.872632 | 0.974236 |
| Iran (Islamic Republic of) | 2004 | 0.871049 | 0.970715 |
| Iran (Islamic Republic of) | 2005 | 0.871362 | 0.967471 |
| Iran (Islamic Republic of) | 2006 | 0.858624 | 0.948691 |
| Iran (Islamic Republic of) | 2007 | 0.840085 | 0.919136 |
| Iran (Islamic Republic of) | 2008 | 0.829588 | 0.900372 |
| Iran (Islamic Republic of) | 2009 | 0.824816 | 0.888598 |
| Iran (Islamic Republic of) | 2010 | 0.826351 | 0.879267 |
| Iran (Islamic Republic of) | 2011 | 0.825291 | 0.871341 |
| Iran (Islamic Republic of) | 2012 | 0.823102 | 0.865946 |
| Iran (Islamic Republic of) | 2013 | 0.839203 | 0.883214 |
| Iran (Islamic Republic of) | 2014 | 0.858072 | 0.903726 |
| Iran (Islamic Republic of) | 2015 | 0.87411  | 0.919495 |

|                            |      |          |          |
|----------------------------|------|----------|----------|
| Iran (Islamic Republic of) | 2016 | 0.89088  | 0.937536 |
| Iran (Islamic Republic of) | 2017 | 0.901889 | 0.949128 |
| Iran (Islamic Republic of) | 2018 | 0.906975 | 0.953392 |
| Iran (Islamic Republic of) | 2019 | 0.915692 | 0.961205 |
| Iraq                       | 1990 | 1.038715 | 0.921613 |
| Iraq                       | 1991 | 1.028035 | 0.91066  |
| Iraq                       | 1992 | 1.015177 | 0.901312 |
| Iraq                       | 1993 | 0.996418 | 0.884872 |
| Iraq                       | 1994 | 0.978218 | 0.864977 |
| Iraq                       | 1995 | 0.970719 | 0.857555 |
| Iraq                       | 1996 | 0.96171  | 0.847265 |
| Iraq                       | 1997 | 0.947098 | 0.832703 |
| Iraq                       | 1998 | 0.932334 | 0.819284 |
| Iraq                       | 1999 | 0.923562 | 0.811365 |
| Iraq                       | 2000 | 0.916529 | 0.805188 |
| Iraq                       | 2001 | 0.912447 | 0.800956 |
| Iraq                       | 2002 | 0.91232  | 0.799917 |
| Iraq                       | 2003 | 0.912054 | 0.799067 |
| Iraq                       | 2004 | 0.919368 | 0.806158 |
| Iraq                       | 2005 | 0.923599 | 0.808822 |
| Iraq                       | 2006 | 0.932396 | 0.814381 |
| Iraq                       | 2007 | 0.932736 | 0.812761 |
| Iraq                       | 2008 | 0.928361 | 0.808737 |
| Iraq                       | 2009 | 0.91609  | 0.797203 |
| Iraq                       | 2010 | 0.898317 | 0.779174 |

|    |         |      |          |          |
|----|---------|------|----------|----------|
| 1  |         |      |          |          |
| 2  |         |      |          |          |
| 3  |         |      |          |          |
| 4  |         |      |          |          |
| 5  | Iraq    | 2011 | 0.886643 | 0.769248 |
| 6  | Iraq    | 2012 | 0.873397 | 0.75733  |
| 7  | Iraq    | 2013 | 0.859141 | 0.744408 |
| 8  | Iraq    | 2014 | 0.849341 | 0.734867 |
| 9  | Iraq    | 2015 | 0.848791 | 0.733316 |
| 10 | Iraq    | 2016 | 0.849734 | 0.733889 |
| 11 | Iraq    | 2017 | 0.850296 | 0.733783 |
| 12 | Iraq    | 2018 | 0.838897 | 0.725088 |
| 13 | Iraq    | 2019 | 0.823535 | 0.707666 |
| 14 | Ireland | 1990 | 0.990332 | 0.642532 |
| 15 | Ireland | 1991 | 1.01067  | 0.652745 |
| 16 | Ireland | 1992 | 1.005023 | 0.645801 |
| 17 | Ireland | 1993 | 0.997892 | 0.639265 |
| 18 | Ireland | 1994 | 1.016307 | 0.644885 |
| 19 | Ireland | 1995 | 1.014649 | 0.636152 |
| 20 | Ireland | 1996 | 1.000293 | 0.620096 |
| 21 | Ireland | 1997 | 1.020021 | 0.631417 |
| 22 | Ireland | 1998 | 1.031917 | 0.637105 |
| 23 | Ireland | 1999 | 1.024805 | 0.629057 |
| 24 | Ireland | 2000 | 1.008419 | 0.613226 |
| 25 | Ireland | 2001 | 1.019148 | 0.611967 |
| 26 | Ireland | 2002 | 1.021805 | 0.615345 |
| 27 | Ireland | 2003 | 1.021697 | 0.61487  |
| 28 | Ireland | 2004 | 1.005065 | 0.60004  |
| 29 | Ireland | 2005 | 1.045104 | 0.620705 |
| 30 |         |      |          |          |
| 31 |         |      |          |          |
| 32 |         |      |          |          |
| 33 |         |      |          |          |
| 34 |         |      |          |          |
| 35 |         |      |          |          |
| 36 |         |      |          |          |
| 37 |         |      |          |          |
| 38 |         |      |          |          |
| 39 |         |      |          |          |
| 40 |         |      |          |          |
| 41 |         |      |          |          |
| 42 |         |      |          |          |
| 43 |         |      |          |          |
| 44 |         |      |          |          |
| 45 |         |      |          |          |
| 46 |         |      |          |          |



1  
2  
3  
4  
5  
6  
7  
8  
9  
10  
11  
12  
13  
14  
15  
16  
17  
18  
19  
20  
21  
22  
23  
24  
25  
26  
27  
28  
29  
30  
31  
32  
33  
34  
35  
36  
37  
38  
39  
40  
41  
42  
43  
44  
45  
46

|         |      |          |          |
|---------|------|----------|----------|
| Ireland | 2006 | 1.067788 | 0.636154 |
| Ireland | 2007 | 1.052256 | 0.630424 |
| Ireland | 2008 | 1.038694 | 0.625566 |
| Ireland | 2009 | 1.017066 | 0.619329 |
| Ireland | 2010 | 1.018538 | 0.623428 |
| Ireland | 2011 | 1.012795 | 0.627264 |
| Ireland | 2012 | 0.975791 | 0.606707 |
| Ireland | 2013 | 0.943072 | 0.590724 |
| Ireland | 2014 | 0.941779 | 0.595064 |
| Ireland | 2015 | 0.952201 | 0.609346 |
| Ireland | 2016 | 0.942132 | 0.61169  |
| Ireland | 2017 | 0.933334 | 0.615757 |
| Ireland | 2018 | 0.93453  | 0.626241 |
| Ireland | 2019 | 0.920745 | 0.626484 |
| Israel  | 1990 | 0.94219  | 0.786904 |
| Israel  | 1991 | 0.919965 | 0.762573 |
| Israel  | 1992 | 0.917957 | 0.753597 |
| Israel  | 1993 | 0.919162 | 0.74611  |
| Israel  | 1994 | 0.919964 | 0.740401 |
| Israel  | 1995 | 0.89525  | 0.714392 |
| Israel  | 1996 | 0.885476 | 0.706356 |
| Israel  | 1997 | 0.869098 | 0.688093 |
| Israel  | 1998 | 0.857361 | 0.667378 |
| Israel  | 1999 | 0.855316 | 0.658138 |
| Israel  | 2000 | 0.841052 | 0.644188 |

|    |        |      |          |          |
|----|--------|------|----------|----------|
| 1  |        |      |          |          |
| 2  |        |      |          |          |
| 3  |        |      |          |          |
| 4  |        |      |          |          |
| 5  | Israel | 2001 | 0.848966 | 0.6474   |
| 6  | Israel | 2002 | 0.849254 | 0.644365 |
| 7  | Israel | 2003 | 0.849257 | 0.639475 |
| 8  | Israel | 2004 | 0.858922 | 0.643102 |
| 9  | Israel | 2005 | 0.861348 | 0.642839 |
| 10 | Israel | 2006 | 0.870257 | 0.648499 |
| 11 | Israel | 2007 | 0.877613 | 0.649739 |
| 12 | Israel | 2008 | 0.887024 | 0.649546 |
| 13 | Israel | 2009 | 0.903354 | 0.655117 |
| 14 | Israel | 2010 | 0.894466 | 0.645255 |
| 15 | Israel | 2011 | 0.916316 | 0.659221 |
| 16 | Israel | 2012 | 0.908112 | 0.649691 |
| 17 | Israel | 2013 | 0.919164 | 0.653967 |
| 18 | Israel | 2014 | 0.917547 | 0.649284 |
| 19 | Israel | 2015 | 0.902198 | 0.636174 |
| 20 | Israel | 2016 | 0.931438 | 0.657062 |
| 21 | Israel | 2017 | 0.929475 | 0.656012 |
| 22 | Israel | 2018 | 0.923335 | 0.653248 |
| 23 | Israel | 2019 | 0.923192 | 0.655589 |
| 24 | Italy  | 1990 | 1.090376 | 0.643927 |
| 25 | Italy  | 1991 | 1.081423 | 0.637552 |
| 26 | Italy  | 1992 | 1.078447 | 0.634752 |
| 27 | Italy  | 1993 | 1.088728 | 0.638461 |
| 28 | Italy  | 1994 | 1.092486 | 0.639173 |
| 29 | Italy  | 1995 | 1.104435 | 0.642915 |
| 30 |        |      |          |          |
| 31 |        |      |          |          |
| 32 |        |      |          |          |
| 33 |        |      |          |          |
| 34 |        |      |          |          |
| 35 |        |      |          |          |
| 36 |        |      |          |          |
| 37 |        |      |          |          |
| 38 |        |      |          |          |
| 39 |        |      |          |          |
| 40 |        |      |          |          |
| 41 |        |      |          |          |
| 42 |        |      |          |          |
| 43 |        |      |          |          |
| 44 |        |      |          |          |
| 45 |        |      |          |          |
| 46 |        |      |          |          |

1  
2  
3  
4  
5  
6  
7  
8  
9  
10  
11  
12  
13  
14  
15  
16  
17  
18  
19  
20  
21  
22  
23  
24  
25  
26  
27  
28  
29  
30  
31  
32  
33  
34  
35  
36  
37  
38  
39  
40  
41  
42  
43  
44  
45  
46

|         |      |          |          |
|---------|------|----------|----------|
| Italy   | 1996 | 1.115154 | 0.644873 |
| Italy   | 1997 | 1.121742 | 0.644068 |
| Italy   | 1998 | 1.130953 | 0.645348 |
| Italy   | 1999 | 1.141682 | 0.646889 |
| Italy   | 2000 | 1.166232 | 0.654341 |
| Italy   | 2001 | 1.182466 | 0.657137 |
| Italy   | 2002 | 1.207321 | 0.66463  |
| Italy   | 2003 | 1.209099 | 0.6605   |
| Italy   | 2004 | 1.216337 | 0.660522 |
| Italy   | 2005 | 1.211844 | 0.651899 |
| Italy   | 2006 | 1.208596 | 0.644847 |
| Italy   | 2007 | 1.210034 | 0.642825 |
| Italy   | 2008 | 1.223902 | 0.648972 |
| Italy   | 2009 | 1.227047 | 0.651423 |
| Italy   | 2010 | 1.241487 | 0.658229 |
| Italy   | 2011 | 1.256087 | 0.66503  |
| Italy   | 2012 | 1.269111 | 0.672045 |
| Italy   | 2013 | 1.262556 | 0.669897 |
| Italy   | 2014 | 1.259651 | 0.670649 |
| Italy   | 2015 | 1.248791 | 0.665998 |
| Italy   | 2016 | 1.241213 | 0.662825 |
| Italy   | 2017 | 1.220767 | 0.657356 |
| Italy   | 2018 | 1.222834 | 0.665099 |
| Italy   | 2019 | 1.210609 | 0.666333 |
| Jamaica | 1990 | 0.636078 | 0.518682 |

|         |      |          |          |
|---------|------|----------|----------|
| Jamaica | 1991 | 0.692646 | 0.56671  |
| Jamaica | 1992 | 0.687608 | 0.56459  |
| Jamaica | 1993 | 0.690036 | 0.566605 |
| Jamaica | 1994 | 0.708948 | 0.583474 |
| Jamaica | 1995 | 0.731778 | 0.602656 |
| Jamaica | 1996 | 0.755209 | 0.621615 |
| Jamaica | 1997 | 0.780986 | 0.641921 |
| Jamaica | 1998 | 0.780952 | 0.642028 |
| Jamaica | 1999 | 0.813121 | 0.665991 |
| Jamaica | 2000 | 0.899106 | 0.732146 |
| Jamaica | 2001 | 0.899379 | 0.732191 |
| Jamaica | 2002 | 0.891943 | 0.735452 |
| Jamaica | 2003 | 0.881381 | 0.726775 |
| Jamaica | 2004 | 0.900935 | 0.744511 |
| Jamaica | 2005 | 0.913895 | 0.76107  |
| Jamaica | 2006 | 0.88166  | 0.736568 |
| Jamaica | 2007 | 0.74946  | 0.632214 |
| Jamaica | 2008 | 0.637378 | 0.539676 |
| Jamaica | 2009 | 0.588224 | 0.494132 |
| Jamaica | 2010 | 0.715381 | 0.601316 |
| Jamaica | 2011 | 0.647498 | 0.544749 |
| Jamaica | 2012 | 0.7813   | 0.660719 |
| Jamaica | 2013 | 0.79124  | 0.671617 |
| Jamaica | 2014 | 0.762489 | 0.646836 |
| Jamaica | 2015 | 0.756701 | 0.64138  |

|         |      |          |          |
|---------|------|----------|----------|
| Jamaica | 2016 | 0.739837 | 0.632018 |
| Jamaica | 2017 | 0.737952 | 0.631909 |
| Jamaica | 2018 | 0.739624 | 0.63439  |
| Jamaica | 2019 | 0.76193  | 0.654431 |
| Japan   | 1990 | 1.071062 | 0.680444 |
| Japan   | 1991 | 1.070475 | 0.67287  |
| Japan   | 1992 | 1.076246 | 0.669168 |
| Japan   | 1993 | 1.085941 | 0.668386 |
| Japan   | 1994 | 1.096482 | 0.668363 |
| Japan   | 1995 | 1.098415 | 0.665185 |
| Japan   | 1996 | 1.116045 | 0.671318 |
| Japan   | 1997 | 1.116951 | 0.666228 |
| Japan   | 1998 | 1.100232 | 0.650244 |
| Japan   | 1999 | 1.085048 | 0.634718 |
| Japan   | 2000 | 1.077853 | 0.623941 |
| Japan   | 2001 | 1.078097 | 0.617512 |
| Japan   | 2002 | 1.081282 | 0.611892 |
| Japan   | 2003 | 1.076595 | 0.602602 |
| Japan   | 2004 | 1.086712 | 0.601979 |
| Japan   | 2005 | 1.079257 | 0.590908 |
| Japan   | 2006 | 1.089796 | 0.590608 |
| Japan   | 2007 | 1.081004 | 0.581309 |
| Japan   | 2008 | 1.068997 | 0.570964 |
| Japan   | 2009 | 1.047886 | 0.557176 |
| Japan   | 2010 | 1.039781 | 0.550218 |

|    |        |      |          |          |
|----|--------|------|----------|----------|
| 1  |        |      |          |          |
| 2  |        |      |          |          |
| 3  |        |      |          |          |
| 4  |        |      |          |          |
| 5  | Japan  | 2011 | 1.059746 | 0.558397 |
| 6  | Japan  | 2012 | 1.071226 | 0.562936 |
| 7  | Japan  | 2013 | 1.081946 | 0.568402 |
| 8  | Japan  | 2014 | 1.09023  | 0.573894 |
| 9  | Japan  | 2015 | 1.09495  | 0.573838 |
| 10 | Japan  | 2016 | 1.105279 | 0.578573 |
| 11 | Japan  | 2017 | 1.106388 | 0.579657 |
| 12 | Japan  | 2018 | 1.120202 | 0.588741 |
| 13 | Japan  | 2019 | 1.123565 | 0.592949 |
| 14 | Jordan | 1990 | 1.243774 | 1.278353 |
| 15 | Jordan | 1991 | 1.271979 | 1.323684 |
| 16 | Jordan | 1992 | 1.212918 | 1.282366 |
| 17 | Jordan | 1993 | 1.233106 | 1.313997 |
| 18 | Jordan | 1994 | 1.211054 | 1.303852 |
| 19 | Jordan | 1995 | 1.231809 | 1.332617 |
| 20 | Jordan | 1996 | 1.284041 | 1.392659 |
| 21 | Jordan | 1997 | 1.287126 | 1.406764 |
| 22 | Jordan | 1998 | 1.308754 | 1.439609 |
| 23 | Jordan | 1999 | 1.333204 | 1.476799 |
| 24 | Jordan | 2000 | 1.358915 | 1.522114 |
| 25 | Jordan | 2001 | 1.404458 | 1.596437 |
| 26 | Jordan | 2002 | 1.427616 | 1.644192 |
| 27 | Jordan | 2003 | 1.421953 | 1.638204 |
| 28 | Jordan | 2004 | 1.479769 | 1.729284 |
| 29 | Jordan | 2005 | 1.497596 | 1.826894 |
| 30 |        |      |          |          |
| 31 |        |      |          |          |
| 32 |        |      |          |          |
| 33 |        |      |          |          |
| 34 |        |      |          |          |
| 35 |        |      |          |          |
| 36 |        |      |          |          |
| 37 |        |      |          |          |
| 38 |        |      |          |          |
| 39 |        |      |          |          |
| 40 |        |      |          |          |
| 41 |        |      |          |          |
| 42 |        |      |          |          |
| 43 |        |      |          |          |
| 44 |        |      |          |          |
| 45 |        |      |          |          |
| 46 |        |      |          |          |

|            |      |          |          |
|------------|------|----------|----------|
| Jordan     | 2006 | 1.443136 | 1.794166 |
| Jordan     | 2007 | 1.234151 | 1.483146 |
| Jordan     | 2008 | 1.106929 | 1.285829 |
| Jordan     | 2009 | 1.019138 | 1.165059 |
| Jordan     | 2010 | 0.948687 | 1.067889 |
| Jordan     | 2011 | 0.940285 | 1.066222 |
| Jordan     | 2012 | 0.951527 | 1.102951 |
| Jordan     | 2013 | 0.966647 | 1.159036 |
| Jordan     | 2014 | 0.973437 | 1.182669 |
| Jordan     | 2015 | 0.936691 | 1.117044 |
| Jordan     | 2016 | 0.952236 | 1.138096 |
| Jordan     | 2017 | 0.970198 | 1.166857 |
| Jordan     | 2018 | 0.973143 | 1.154724 |
| Jordan     | 2019 | 0.982615 | 1.164998 |
| Kazakhstan | 1990 | 0.999933 | 0.671258 |
| Kazakhstan | 1991 | 0.981541 | 0.660741 |
| Kazakhstan | 1992 | 0.97938  | 0.666346 |
| Kazakhstan | 1993 | 0.981365 | 0.670065 |
| Kazakhstan | 1994 | 0.974429 | 0.669119 |
| Kazakhstan | 1995 | 0.950401 | 0.661327 |
| Kazakhstan | 1996 | 0.930785 | 0.656143 |
| Kazakhstan | 1997 | 0.943874 | 0.664252 |
| Kazakhstan | 1998 | 0.935451 | 0.657537 |
| Kazakhstan | 1999 | 0.926939 | 0.650073 |
| Kazakhstan | 2000 | 0.886229 | 0.629965 |

|            |      |          |          |
|------------|------|----------|----------|
| Kazakhstan | 2001 | 0.881548 | 0.629943 |
| Kazakhstan | 2002 | 0.869182 | 0.618695 |
| Kazakhstan | 2003 | 0.840973 | 0.59763  |
| Kazakhstan | 2004 | 0.821565 | 0.586984 |
| Kazakhstan | 2005 | 0.821461 | 0.589292 |
| Kazakhstan | 2006 | 0.811659 | 0.58123  |
| Kazakhstan | 2007 | 0.818429 | 0.578066 |
| Kazakhstan | 2008 | 0.839521 | 0.583216 |
| Kazakhstan | 2009 | 0.85267  | 0.585487 |
| Kazakhstan | 2010 | 0.851782 | 0.57773  |
| Kazakhstan | 2011 | 0.848325 | 0.564973 |
| Kazakhstan | 2012 | 0.849505 | 0.555703 |
| Kazakhstan | 2013 | 0.851565 | 0.5504   |
| Kazakhstan | 2014 | 0.822531 | 0.523314 |
| Kazakhstan | 2015 | 0.844378 | 0.529259 |
| Kazakhstan | 2016 | 0.839327 | 0.522411 |
| Kazakhstan | 2017 | 0.844597 | 0.520727 |
| Kazakhstan | 2018 | 0.828471 | 0.515002 |
| Kazakhstan | 2019 | 0.852281 | 0.536614 |
| Kenya      | 1990 | 0.707017 | 0.669507 |
| Kenya      | 1991 | 0.695049 | 0.65375  |
| Kenya      | 1992 | 0.684015 | 0.637947 |
| Kenya      | 1993 | 0.671695 | 0.620169 |
| Kenya      | 1994 | 0.665955 | 0.607842 |
| Kenya      | 1995 | 0.656889 | 0.59345  |



|          |      |          |          |
|----------|------|----------|----------|
| Kenya    | 1996 | 0.646414 | 0.578509 |
| Kenya    | 1997 | 0.645358 | 0.571636 |
| Kenya    | 1998 | 0.63756  | 0.559602 |
| Kenya    | 1999 | 0.632168 | 0.549598 |
| Kenya    | 2000 | 0.629263 | 0.542961 |
| Kenya    | 2001 | 0.63245  | 0.542569 |
| Kenya    | 2002 | 0.638176 | 0.545642 |
| Kenya    | 2003 | 0.642005 | 0.548332 |
| Kenya    | 2004 | 0.640791 | 0.547412 |
| Kenya    | 2005 | 0.640905 | 0.546741 |
| Kenya    | 2006 | 0.638279 | 0.544025 |
| Kenya    | 2007 | 0.639843 | 0.544383 |
| Kenya    | 2008 | 0.641193 | 0.544797 |
| Kenya    | 2009 | 0.64706  | 0.549628 |
| Kenya    | 2010 | 0.662556 | 0.562322 |
| Kenya    | 2011 | 0.682387 | 0.578683 |
| Kenya    | 2012 | 0.703185 | 0.596299 |
| Kenya    | 2013 | 0.725656 | 0.615121 |
| Kenya    | 2014 | 0.743482 | 0.63115  |
| Kenya    | 2015 | 0.759326 | 0.646749 |
| Kenya    | 2016 | 0.766795 | 0.655746 |
| Kenya    | 2017 | 0.775255 | 0.665895 |
| Kenya    | 2018 | 0.781453 | 0.675112 |
| Kenya    | 2019 | 0.784901 | 0.682011 |
| Kiribati | 1990 | 1.4921   | 1.196769 |

|          |      |          |          |
|----------|------|----------|----------|
| Kiribati | 1991 | 1.456679 | 1.172151 |
| Kiribati | 1992 | 1.426989 | 1.152817 |
| Kiribati | 1993 | 1.399922 | 1.134295 |
| Kiribati | 1994 | 1.379383 | 1.119111 |
| Kiribati | 1995 | 1.357045 | 1.1003   |
| Kiribati | 1996 | 1.342688 | 1.088594 |
| Kiribati | 1997 | 1.337935 | 1.081264 |
| Kiribati | 1998 | 1.335628 | 1.075184 |
| Kiribati | 1999 | 1.338924 | 1.073275 |
| Kiribati | 2000 | 1.334341 | 1.064826 |
| Kiribati | 2001 | 1.330727 | 1.059429 |
| Kiribati | 2002 | 1.334753 | 1.061153 |
| Kiribati | 2003 | 1.344028 | 1.068185 |
| Kiribati | 2004 | 1.360788 | 1.08068  |
| Kiribati | 2005 | 1.358904 | 1.078589 |
| Kiribati | 2006 | 1.337353 | 1.06056  |
| Kiribati | 2007 | 1.308545 | 1.039539 |
| Kiribati | 2008 | 1.284763 | 1.019264 |
| Kiribati | 2009 | 1.261421 | 0.998717 |
| Kiribati | 2010 | 1.244095 | 0.982611 |
| Kiribati | 2011 | 1.224451 | 0.964273 |
| Kiribati | 2012 | 1.203869 | 0.946504 |
| Kiribati | 2013 | 1.187289 | 0.931639 |
| Kiribati | 2014 | 1.173134 | 0.918956 |
| Kiribati | 2015 | 1.174871 | 0.919107 |

1  
2  
3  
4  
5  
6  
7  
8  
9  
10  
11  
12  
13  
14  
15  
16  
17  
18  
19  
20  
21  
22  
23  
24  
25  
26  
27  
28  
29  
30  
31  
32  
33  
34  
35  
36  
37  
38  
39  
40  
41  
42  
43  
44  
45  
46

|          |      |          |          |
|----------|------|----------|----------|
| Kiribati | 2016 | 1.184607 | 0.925399 |
| Kiribati | 2017 | 1.193378 | 0.931678 |
| Kiribati | 2018 | 1.19579  | 0.933418 |
| Kiribati | 2019 | 1.197517 | 0.934093 |
| Kuwait   | 1990 | 0.906022 | 1.255995 |
| Kuwait   | 1991 | 0.892059 | 1.282196 |
| Kuwait   | 1992 | 0.885625 | 1.259416 |
| Kuwait   | 1993 | 0.768031 | 1.079664 |
| Kuwait   | 1994 | 0.721014 | 1.029666 |
| Kuwait   | 1995 | 0.703499 | 1.018502 |
| Kuwait   | 1996 | 0.72527  | 1.063488 |
| Kuwait   | 1997 | 0.668915 | 1.014207 |
| Kuwait   | 1998 | 0.704428 | 1.07427  |
| Kuwait   | 1999 | 0.635082 | 0.968802 |
| Kuwait   | 2000 | 0.636471 | 0.973544 |
| Kuwait   | 2001 | 0.77434  | 1.188986 |
| Kuwait   | 2002 | 0.694942 | 1.096564 |
| Kuwait   | 2003 | 0.673842 | 1.081392 |
| Kuwait   | 2004 | 0.653702 | 1.044354 |
| Kuwait   | 2005 | 0.61209  | 0.973403 |
| Kuwait   | 2006 | 0.597222 | 0.957241 |
| Kuwait   | 2007 | 0.649274 | 1.040845 |
| Kuwait   | 2008 | 0.671105 | 1.096313 |
| Kuwait   | 2009 | 0.757462 | 1.216108 |
| Kuwait   | 2010 | 0.839781 | 1.32464  |

|            |      |          |          |
|------------|------|----------|----------|
| Kuwait     | 2011 | 0.862705 | 1.35794  |
| Kuwait     | 2012 | 0.814298 | 1.283671 |
| Kuwait     | 2013 | 0.814568 | 1.285124 |
| Kuwait     | 2014 | 0.84126  | 1.300564 |
| Kuwait     | 2015 | 0.767129 | 1.168468 |
| Kuwait     | 2016 | 0.739668 | 1.118587 |
| Kuwait     | 2017 | 0.726698 | 1.081906 |
| Kuwait     | 2018 | 0.713715 | 1.056145 |
| Kuwait     | 2019 | 0.723676 | 1.037296 |
| Kyrgyzstan | 1990 | 0.891951 | 0.672838 |
| Kyrgyzstan | 1991 | 0.908612 | 0.691176 |
| Kyrgyzstan | 1992 | 0.898784 | 0.681623 |
| Kyrgyzstan | 1993 | 0.850417 | 0.650437 |
| Kyrgyzstan | 1994 | 0.82783  | 0.639884 |
| Kyrgyzstan | 1995 | 0.837243 | 0.653969 |
| Kyrgyzstan | 1996 | 0.834809 | 0.650548 |
| Kyrgyzstan | 1997 | 0.819205 | 0.637971 |
| Kyrgyzstan | 1998 | 0.831842 | 0.648076 |
| Kyrgyzstan | 1999 | 0.840267 | 0.664432 |
| Kyrgyzstan | 2000 | 0.844168 | 0.661815 |
| Kyrgyzstan | 2001 | 0.830856 | 0.658922 |
| Kyrgyzstan | 2002 | 0.828249 | 0.667975 |
| Kyrgyzstan | 2003 | 0.824127 | 0.67254  |
| Kyrgyzstan | 2004 | 0.810225 | 0.669459 |
| Kyrgyzstan | 2005 | 0.806345 | 0.668711 |

|    |                                  |      |          |          |
|----|----------------------------------|------|----------|----------|
| 1  |                                  |      |          |          |
| 2  |                                  |      |          |          |
| 3  |                                  |      |          |          |
| 4  |                                  |      |          |          |
| 5  | Kyrgyzstan                       | 2006 | 0.770748 | 0.64556  |
| 6  | Kyrgyzstan                       | 2007 | 0.755731 | 0.63405  |
| 7  | Kyrgyzstan                       | 2008 | 0.784272 | 0.65742  |
| 8  | Kyrgyzstan                       | 2009 | 0.81073  | 0.67425  |
| 9  | Kyrgyzstan                       | 2010 | 0.817755 | 0.685054 |
| 10 | Kyrgyzstan                       | 2011 | 0.840219 | 0.711408 |
| 11 | Kyrgyzstan                       | 2012 | 0.841235 | 0.716805 |
| 12 | Kyrgyzstan                       | 2013 | 0.84349  | 0.720402 |
| 13 | Kyrgyzstan                       | 2014 | 0.842241 | 0.705299 |
| 14 | Kyrgyzstan                       | 2015 | 0.860066 | 0.70151  |
| 15 | Kyrgyzstan                       | 2016 | 0.874609 | 0.704633 |
| 16 | Kyrgyzstan                       | 2017 | 0.849871 | 0.684358 |
| 17 | Kyrgyzstan                       | 2018 | 0.841746 | 0.687493 |
| 18 | Kyrgyzstan                       | 2019 | 0.83568  | 0.684807 |
| 19 | Lao People's Democratic Republic | 1990 | 1.080257 | 0.904518 |
| 20 | Lao People's Democratic Republic | 1991 | 1.079338 | 0.906014 |
| 21 | Lao People's Democratic Republic | 1992 | 1.08287  | 0.911731 |
| 22 | Lao People's Democratic Republic | 1993 | 1.084715 | 0.916095 |
| 23 | Lao People's Democratic Republic | 1994 | 1.087379 | 0.920926 |
| 24 | Lao People's Democratic Republic | 1995 | 1.087375 | 0.922831 |
| 25 | Lao People's Democratic Republic | 1996 | 1.079552 | 0.918976 |
| 26 | Lao People's Democratic Republic | 1997 | 1.072371 | 0.91556  |
| 27 | Lao People's Democratic Republic | 1998 | 1.058718 | 0.906658 |
| 28 | Lao People's Democratic Republic | 1999 | 1.052176 | 0.902857 |
| 29 | Lao People's Democratic Republic | 2000 | 1.036378 | 0.890862 |
| 30 |                                  |      |          |          |
| 31 |                                  |      |          |          |
| 32 |                                  |      |          |          |
| 33 |                                  |      |          |          |
| 34 |                                  |      |          |          |
| 35 |                                  |      |          |          |
| 36 |                                  |      |          |          |
| 37 |                                  |      |          |          |
| 38 |                                  |      |          |          |
| 39 |                                  |      |          |          |
| 40 |                                  |      |          |          |
| 41 |                                  |      |          |          |
| 42 |                                  |      |          |          |
| 43 |                                  |      |          |          |
| 44 |                                  |      |          |          |
| 45 |                                  |      |          |          |
| 46 |                                  |      |          |          |

|                                  |      |          |          |
|----------------------------------|------|----------|----------|
| Lao People's Democratic Republic | 2001 | 1.02433  | 0.883273 |
| Lao People's Democratic Republic | 2002 | 1.015382 | 0.87784  |
| Lao People's Democratic Republic | 2003 | 1.002093 | 0.869322 |
| Lao People's Democratic Republic | 2004 | 0.99141  | 0.862162 |
| Lao People's Democratic Republic | 2005 | 0.983924 | 0.856121 |
| Lao People's Democratic Republic | 2006 | 0.974171 | 0.850443 |
| Lao People's Democratic Republic | 2007 | 0.969745 | 0.848823 |
| Lao People's Democratic Republic | 2008 | 0.968779 | 0.849477 |
| Lao People's Democratic Republic | 2009 | 0.964921 | 0.846846 |
| Lao People's Democratic Republic | 2010 | 0.962207 | 0.843804 |
| Lao People's Democratic Republic | 2011 | 0.957551 | 0.841215 |
| Lao People's Democratic Republic | 2012 | 0.951021 | 0.838007 |
| Lao People's Democratic Republic | 2013 | 0.947474 | 0.837311 |
| Lao People's Democratic Republic | 2014 | 0.942958 | 0.835606 |
| Lao People's Democratic Republic | 2015 | 0.939503 | 0.833335 |
| Lao People's Democratic Republic | 2016 | 0.936031 | 0.833099 |
| Lao People's Democratic Republic | 2017 | 0.933775 | 0.833237 |
| Lao People's Democratic Republic | 2018 | 0.929921 | 0.831474 |
| Lao People's Democratic Republic | 2019 | 0.927608 | 0.831059 |
| Latvia                           | 1990 | 1.205006 | 0.533461 |
| Latvia                           | 1991 | 1.183017 | 0.522451 |
| Latvia                           | 1992 | 1.1596   | 0.513471 |
| Latvia                           | 1993 | 1.091711 | 0.49012  |
| Latvia                           | 1994 | 1.035137 | 0.470417 |
| Latvia                           | 1995 | 1.061499 | 0.481214 |

1  
2  
3  
4  
5  
6  
7  
8  
9  
10  
11  
12  
13  
14  
15  
16  
17  
18  
19  
20  
21  
22  
23  
24  
25  
26  
27  
28  
29  
30  
31  
32  
33  
34  
35  
36  
37  
38  
39  
40  
41  
42  
43  
44  
45  
46

|         |      |          |          |
|---------|------|----------|----------|
| Latvia  | 1996 | 1.062243 | 0.487466 |
| Latvia  | 1997 | 1.055513 | 0.488382 |
| Latvia  | 1998 | 1.044571 | 0.489392 |
| Latvia  | 1999 | 1.049745 | 0.491657 |
| Latvia  | 2000 | 1.060367 | 0.490885 |
| Latvia  | 2001 | 1.058915 | 0.492391 |
| Latvia  | 2002 | 1.072686 | 0.496717 |
| Latvia  | 2003 | 1.191884 | 0.544692 |
| Latvia  | 2004 | 1.183538 | 0.544267 |
| Latvia  | 2005 | 1.135283 | 0.525288 |
| Latvia  | 2006 | 1.180254 | 0.548254 |
| Latvia  | 2007 | 1.191916 | 0.549398 |
| Latvia  | 2008 | 1.338475 | 0.604078 |
| Latvia  | 2009 | 1.473186 | 0.665503 |
| Latvia  | 2010 | 1.605934 | 0.719695 |
| Latvia  | 2011 | 1.734377 | 0.76653  |
| Latvia  | 2012 | 1.736977 | 0.761187 |
| Latvia  | 2013 | 1.795712 | 0.787659 |
| Latvia  | 2014 | 1.727391 | 0.755626 |
| Latvia  | 2015 | 1.815508 | 0.792721 |
| Latvia  | 2016 | 1.870149 | 0.814017 |
| Latvia  | 2017 | 1.84377  | 0.808288 |
| Latvia  | 2018 | 1.800032 | 0.794765 |
| Latvia  | 2019 | 1.764838 | 0.785235 |
| Lebanon | 1990 | 1.071467 | 0.981764 |

|         |      |          |          |
|---------|------|----------|----------|
| Lebanon | 1991 | 1.096284 | 1.005245 |
| Lebanon | 1992 | 1.107116 | 1.018167 |
| Lebanon | 1993 | 1.116366 | 1.030655 |
| Lebanon | 1994 | 1.123867 | 1.0433   |
| Lebanon | 1995 | 1.145438 | 1.068906 |
| Lebanon | 1996 | 1.152793 | 1.082827 |
| Lebanon | 1997 | 1.150313 | 1.087767 |
| Lebanon | 1998 | 1.160116 | 1.103824 |
| Lebanon | 1999 | 1.142017 | 1.095643 |
| Lebanon | 2000 | 1.136071 | 1.09651  |
| Lebanon | 2001 | 1.119939 | 1.087568 |
| Lebanon | 2002 | 1.108308 | 1.081466 |
| Lebanon | 2003 | 1.095733 | 1.073018 |
| Lebanon | 2004 | 1.071111 | 1.051902 |
| Lebanon | 2005 | 1.050357 | 1.031778 |
| Lebanon | 2006 | 1.030823 | 1.01005  |
| Lebanon | 2007 | 1.013675 | 0.987874 |
| Lebanon | 2008 | 1.001423 | 0.968311 |
| Lebanon | 2009 | 1.001269 | 0.95813  |
| Lebanon | 2010 | 1.011659 | 0.956166 |
| Lebanon | 2011 | 1.014475 | 0.945418 |
| Lebanon | 2012 | 1.01685  | 0.933202 |
| Lebanon | 2013 | 1.030695 | 0.93028  |
| Lebanon | 2014 | 1.053575 | 0.933731 |
| Lebanon | 2015 | 1.083446 | 0.942194 |



|    |         |      |          |          |
|----|---------|------|----------|----------|
| 1  |         |      |          |          |
| 2  |         |      |          |          |
| 3  |         |      |          |          |
| 4  |         |      |          |          |
| 5  | Lebanon | 2016 | 1.11331  | 0.94979  |
| 6  | Lebanon | 2017 | 1.146106 | 0.959078 |
| 7  | Lebanon | 2018 | 1.180669 | 0.969818 |
| 8  | Lebanon | 2019 | 1.214408 | 0.980276 |
| 9  | Lebanon | 2019 | 1.214408 | 0.980276 |
| 10 | Lesotho | 1990 | 0.547406 | 0.365938 |
| 11 | Lesotho | 1991 | 0.542313 | 0.361697 |
| 12 | Lesotho | 1992 | 0.533141 | 0.355213 |
| 13 | Lesotho | 1992 | 0.533141 | 0.355213 |
| 14 | Lesotho | 1993 | 0.52431  | 0.348481 |
| 15 | Lesotho | 1994 | 0.507527 | 0.337316 |
| 16 | Lesotho | 1994 | 0.507527 | 0.337316 |
| 17 | Lesotho | 1995 | 0.487595 | 0.323129 |
| 18 | Lesotho | 1996 | 0.460489 | 0.303582 |
| 19 | Lesotho | 1997 | 0.433845 | 0.283866 |
| 20 | Lesotho | 1997 | 0.433845 | 0.283866 |
| 21 | Lesotho | 1998 | 0.4568   | 0.296374 |
| 22 | Lesotho | 1999 | 0.483221 | 0.311493 |
| 23 | Lesotho | 1999 | 0.483221 | 0.311493 |
| 24 | Lesotho | 2000 | 0.541543 | 0.347625 |
| 25 | Lesotho | 2001 | 0.554774 | 0.355842 |
| 26 | Lesotho | 2002 | 0.580648 | 0.372819 |
| 27 | Lesotho | 2002 | 0.580648 | 0.372819 |
| 28 | Lesotho | 2003 | 0.628877 | 0.403491 |
| 29 | Lesotho | 2004 | 0.639428 | 0.412443 |
| 30 | Lesotho | 2004 | 0.639428 | 0.412443 |
| 31 | Lesotho | 2005 | 0.656144 | 0.4243   |
| 32 | Lesotho | 2006 | 0.657785 | 0.427168 |
| 33 | Lesotho | 2007 | 0.674236 | 0.438252 |
| 34 | Lesotho | 2008 | 0.701223 | 0.456121 |
| 35 | Lesotho | 2008 | 0.701223 | 0.456121 |
| 36 | Lesotho | 2009 | 0.707365 | 0.462249 |
| 37 | Lesotho | 2010 | 0.71764  | 0.471142 |
| 38 |         |      |          |          |
| 39 |         |      |          |          |
| 40 |         |      |          |          |
| 41 |         |      |          |          |
| 42 |         |      |          |          |
| 43 |         |      |          |          |
| 44 |         |      |          |          |
| 45 |         |      |          |          |
| 46 |         |      |          |          |

|    |         |      |          |          |
|----|---------|------|----------|----------|
| 1  |         |      |          |          |
| 2  |         |      |          |          |
| 3  |         |      |          |          |
| 4  |         |      |          |          |
| 5  | Lesotho | 2011 | 0.721541 | 0.476297 |
| 6  | Lesotho | 2012 | 0.738423 | 0.489759 |
| 7  | Lesotho | 2013 | 0.742987 | 0.495743 |
| 8  | Lesotho | 2014 | 0.740565 | 0.497532 |
| 9  | Lesotho | 2015 | 0.735094 | 0.496563 |
| 10 | Lesotho | 2016 | 0.722892 | 0.490841 |
| 11 | Lesotho | 2017 | 0.711107 | 0.4857   |
| 12 | Lesotho | 2018 | 0.705235 | 0.48378  |
| 13 | Lesotho | 2019 | 0.705917 | 0.485671 |
| 14 | Liberia | 1990 | 0.9085   | 0.996005 |
| 15 | Liberia | 1991 | 0.911296 | 0.998861 |
| 16 | Liberia | 1992 | 0.925106 | 1.011605 |
| 17 | Liberia | 1993 | 0.924282 | 1.008222 |
| 18 | Liberia | 1994 | 0.917343 | 0.998056 |
| 19 | Liberia | 1995 | 0.913325 | 0.981736 |
| 20 | Liberia | 1996 | 0.878938 | 0.937608 |
| 21 | Liberia | 1997 | 0.869847 | 0.918023 |
| 22 | Liberia | 1998 | 0.850108 | 0.894908 |
| 23 | Liberia | 1999 | 0.838556 | 0.881561 |
| 24 | Liberia | 2000 | 0.849539 | 0.884162 |
| 25 | Liberia | 2001 | 0.86329  | 0.889863 |
| 26 | Liberia | 2002 | 0.885972 | 0.907093 |
| 27 | Liberia | 2003 | 0.88833  | 0.908553 |
| 28 | Liberia | 2004 | 0.899159 | 0.919208 |
| 29 | Liberia | 2005 | 0.912469 | 0.924308 |
| 30 |         |      |          |          |
| 31 |         |      |          |          |
| 32 |         |      |          |          |
| 33 |         |      |          |          |
| 34 |         |      |          |          |
| 35 |         |      |          |          |
| 36 |         |      |          |          |
| 37 |         |      |          |          |
| 38 |         |      |          |          |
| 39 |         |      |          |          |
| 40 |         |      |          |          |
| 41 |         |      |          |          |
| 42 |         |      |          |          |
| 43 |         |      |          |          |
| 44 |         |      |          |          |
| 45 |         |      |          |          |
| 46 |         |      |          |          |

1  
2  
3  
4  
5  
6  
7  
8  
9  
10  
11  
12  
13  
14  
15  
16  
17  
18  
19  
20  
21  
22  
23  
24  
25  
26  
27  
28  
29  
30  
31  
32  
33  
34  
35  
36  
37  
38  
39  
40  
41  
42  
43  
44  
45  
46

|         |      |          |          |
|---------|------|----------|----------|
| Liberia | 2006 | 0.92007  | 0.923942 |
| Liberia | 2007 | 0.924098 | 0.921404 |
| Liberia | 2008 | 0.926949 | 0.929499 |
| Liberia | 2009 | 0.922828 | 0.930079 |
| Liberia | 2010 | 0.930016 | 0.935905 |
| Liberia | 2011 | 0.941819 | 0.945008 |
| Liberia | 2012 | 0.942946 | 0.943157 |
| Liberia | 2013 | 0.938623 | 0.938907 |
| Liberia | 2014 | 0.940143 | 0.942135 |
| Liberia | 2015 | 0.942099 | 0.941489 |
| Liberia | 2016 | 0.950782 | 0.94713  |
| Liberia | 2017 | 0.957875 | 0.950271 |
| Liberia | 2018 | 0.960514 | 0.9517   |
| Liberia | 2019 | 0.96058  | 0.953451 |
| Libya   | 1990 | 1.055999 | 1.102401 |
| Libya   | 1991 | 1.061455 | 1.107185 |
| Libya   | 1992 | 1.031746 | 1.074807 |
| Libya   | 1993 | 1.021858 | 1.061961 |
| Libya   | 1994 | 1.014832 | 1.051481 |
| Libya   | 1995 | 1.008831 | 1.042201 |
| Libya   | 1996 | 1.016403 | 1.048683 |
| Libya   | 1997 | 1.000094 | 1.031347 |
| Libya   | 1998 | 0.991815 | 1.025339 |
| Libya   | 1999 | 0.982479 | 1.020405 |
| Libya   | 2000 | 0.97538  | 1.013309 |

|           |      |          |          |
|-----------|------|----------|----------|
| Libya     | 2001 | 0.934374 | 0.965433 |
| Libya     | 2002 | 0.904144 | 0.92635  |
| Libya     | 2003 | 0.899903 | 0.916303 |
| Libya     | 2004 | 0.962226 | 0.97716  |
| Libya     | 2005 | 1.003809 | 1.021942 |
| Libya     | 2006 | 1.022    | 1.036288 |
| Libya     | 2007 | 1.116889 | 1.122346 |
| Libya     | 2008 | 1.143164 | 1.149181 |
| Libya     | 2009 | 1.226991 | 1.228515 |
| Libya     | 2010 | 1.20636  | 1.206442 |
| Libya     | 2011 | 1.189759 | 1.190245 |
| Libya     | 2012 | 1.216209 | 1.220529 |
| Libya     | 2013 | 1.219613 | 1.224468 |
| Libya     | 2014 | 1.214545 | 1.220811 |
| Libya     | 2015 | 1.225026 | 1.231131 |
| Libya     | 2016 | 1.228146 | 1.234103 |
| Libya     | 2017 | 1.223734 | 1.228194 |
| Libya     | 2018 | 1.220224 | 1.223662 |
| Libya     | 2019 | 1.214728 | 1.216594 |
| Lithuania | 1990 | 0.971313 | 0.540179 |
| Lithuania | 1991 | 0.985477 | 0.54626  |
| Lithuania | 1992 | 0.989442 | 0.546932 |
| Lithuania | 1993 | 0.949626 | 0.53415  |
| Lithuania | 1994 | 0.96797  | 0.550823 |
| Lithuania | 1995 | 1.00168  | 0.568811 |

1  
2  
3  
4  
5  
6  
7  
8  
9  
10  
11  
12  
13  
14  
15  
16  
17  
18  
19  
20  
21  
22  
23  
24  
25  
26  
27  
28  
29  
30  
31  
32  
33  
34  
35  
36  
37  
38  
39  
40  
41  
42  
43  
44  
45  
46

|            |      |          |          |
|------------|------|----------|----------|
| Lithuania  | 1996 | 1.019597 | 0.571551 |
| Lithuania  | 1997 | 1.05621  | 0.584609 |
| Lithuania  | 1998 | 1.055637 | 0.581885 |
| Lithuania  | 1999 | 1.050745 | 0.578728 |
| Lithuania  | 2000 | 1.057401 | 0.578423 |
| Lithuania  | 2001 | 1.067042 | 0.580847 |
| Lithuania  | 2002 | 1.080398 | 0.579941 |
| Lithuania  | 2003 | 1.136544 | 0.606356 |
| Lithuania  | 2004 | 1.103524 | 0.587737 |
| Lithuania  | 2005 | 1.084225 | 0.579263 |
| Lithuania  | 2006 | 1.113196 | 0.594664 |
| Lithuania  | 2007 | 1.096276 | 0.583299 |
| Lithuania  | 2008 | 1.198771 | 0.624744 |
| Lithuania  | 2009 | 1.229255 | 0.622287 |
| Lithuania  | 2010 | 1.21543  | 0.605984 |
| Lithuania  | 2011 | 1.22594  | 0.611089 |
| Lithuania  | 2012 | 1.243841 | 0.615975 |
| Lithuania  | 2013 | 1.228526 | 0.60492  |
| Lithuania  | 2014 | 1.242323 | 0.608617 |
| Lithuania  | 2015 | 1.266152 | 0.620736 |
| Lithuania  | 2016 | 1.250372 | 0.614161 |
| Lithuania  | 2017 | 1.337779 | 0.654176 |
| Lithuania  | 2018 | 1.319187 | 0.645546 |
| Lithuania  | 2019 | 1.350657 | 0.661003 |
| Luxembourg | 1990 | 1.393482 | 0.713825 |

|            |      |          |          |
|------------|------|----------|----------|
| Luxembourg | 1991 | 1.405872 | 0.718466 |
| Luxembourg | 1992 | 1.45974  | 0.741392 |
| Luxembourg | 1993 | 1.457165 | 0.737255 |
| Luxembourg | 1994 | 1.465173 | 0.734587 |
| Luxembourg | 1995 | 1.498477 | 0.746412 |
| Luxembourg | 1996 | 1.532323 | 0.762892 |
| Luxembourg | 1997 | 1.541765 | 0.767401 |
| Luxembourg | 1998 | 1.53696  | 0.763833 |
| Luxembourg | 1999 | 1.557634 | 0.771755 |
| Luxembourg | 2000 | 1.583232 | 0.780806 |
| Luxembourg | 2001 | 1.629875 | 0.804553 |
| Luxembourg | 2002 | 1.58333  | 0.786575 |
| Luxembourg | 2003 | 1.541825 | 0.764156 |
| Luxembourg | 2004 | 1.542719 | 0.759595 |
| Luxembourg | 2005 | 1.564119 | 0.7683   |
| Luxembourg | 2006 | 1.568078 | 0.772499 |
| Luxembourg | 2007 | 1.574228 | 0.78169  |
| Luxembourg | 2008 | 1.559942 | 0.780138 |
| Luxembourg | 2009 | 1.486968 | 0.747579 |
| Luxembourg | 2010 | 1.461338 | 0.738203 |
| Luxembourg | 2011 | 1.483877 | 0.760491 |
| Luxembourg | 2012 | 1.434736 | 0.751165 |
| Luxembourg | 2013 | 1.437263 | 0.769188 |
| Luxembourg | 2014 | 1.436678 | 0.781738 |
| Luxembourg | 2015 | 1.449766 | 0.795169 |

|    |            |      |          |          |
|----|------------|------|----------|----------|
| 1  |            |      |          |          |
| 2  |            |      |          |          |
| 3  |            |      |          |          |
| 4  |            |      |          |          |
| 5  | Luxembourg | 2016 | 1.452105 | 0.803893 |
| 6  | Luxembourg | 2017 | 1.424215 | 0.802565 |
| 7  | Luxembourg | 2018 | 1.395836 | 0.799804 |
| 8  | Luxembourg | 2019 | 1.372174 | 0.796658 |
| 9  | Madagascar | 1990 | 0.654498 | 0.630902 |
| 10 | Madagascar | 1991 | 0.665058 | 0.636322 |
| 11 | Madagascar | 1992 | 0.679494 | 0.646495 |
| 12 | Madagascar | 1993 | 0.674667 | 0.639008 |
| 13 | Madagascar | 1994 | 0.673359 | 0.633825 |
| 14 | Madagascar | 1995 | 0.672929 | 0.631342 |
| 15 | Madagascar | 1996 | 0.669081 | 0.625767 |
| 16 | Madagascar | 1997 | 0.68748  | 0.638721 |
| 17 | Madagascar | 1998 | 0.690612 | 0.638743 |
| 18 | Madagascar | 1999 | 0.690685 | 0.635064 |
| 19 | Madagascar | 2000 | 0.704869 | 0.643978 |
| 20 | Madagascar | 2001 | 0.712433 | 0.64898  |
| 21 | Madagascar | 2002 | 0.730031 | 0.662803 |
| 22 | Madagascar | 2003 | 0.730674 | 0.662693 |
| 23 | Madagascar | 2004 | 0.739866 | 0.667256 |
| 24 | Madagascar | 2005 | 0.736319 | 0.660275 |
| 25 | Madagascar | 2006 | 0.730087 | 0.65173  |
| 26 | Madagascar | 2007 | 0.726425 | 0.64593  |
| 27 | Madagascar | 2008 | 0.72202  | 0.640593 |
| 28 | Madagascar | 2009 | 0.728877 | 0.645161 |
| 29 | Madagascar | 2010 | 0.734435 | 0.649298 |
| 30 |            |      |          |          |
| 31 |            |      |          |          |
| 32 |            |      |          |          |
| 33 |            |      |          |          |
| 34 |            |      |          |          |
| 35 |            |      |          |          |
| 36 |            |      |          |          |
| 37 |            |      |          |          |
| 38 |            |      |          |          |
| 39 |            |      |          |          |
| 40 |            |      |          |          |
| 41 |            |      |          |          |
| 42 |            |      |          |          |
| 43 |            |      |          |          |
| 44 |            |      |          |          |
| 45 |            |      |          |          |
| 46 |            |      |          |          |

|            |      |          |          |
|------------|------|----------|----------|
| Madagascar | 2011 | 0.741916 | 0.654738 |
| Madagascar | 2012 | 0.749575 | 0.661406 |
| Madagascar | 2013 | 0.756602 | 0.668668 |
| Madagascar | 2014 | 0.764441 | 0.6762   |
| Madagascar | 2015 | 0.770191 | 0.682863 |
| Madagascar | 2016 | 0.774117 | 0.690311 |
| Madagascar | 2017 | 0.779615 | 0.698152 |
| Madagascar | 2018 | 0.78173  | 0.702984 |
| Madagascar | 2019 | 0.783939 | 0.70848  |
| Malawi     | 1990 | 0.863324 | 0.714457 |
| Malawi     | 1991 | 0.838268 | 0.692198 |
| Malawi     | 1992 | 0.814011 | 0.670492 |
| Malawi     | 1993 | 0.796118 | 0.651846 |
| Malawi     | 1994 | 0.780322 | 0.635558 |
| Malawi     | 1995 | 0.762866 | 0.621129 |
| Malawi     | 1996 | 0.748306 | 0.610385 |
| Malawi     | 1997 | 0.734158 | 0.599556 |
| Malawi     | 1998 | 0.72624  | 0.593395 |
| Malawi     | 1999 | 0.724455 | 0.586929 |
| Malawi     | 2000 | 0.715552 | 0.575648 |
| Malawi     | 2001 | 0.705807 | 0.565471 |
| Malawi     | 2002 | 0.70057  | 0.558742 |
| Malawi     | 2003 | 0.700275 | 0.556185 |
| Malawi     | 2004 | 0.690505 | 0.54759  |
| Malawi     | 2005 | 0.684543 | 0.540365 |



|    |          |      |          |          |
|----|----------|------|----------|----------|
| 1  |          |      |          |          |
| 2  |          |      |          |          |
| 3  |          |      |          |          |
| 4  |          |      |          |          |
| 5  | Malawi   | 2006 | 0.682796 | 0.534722 |
| 6  | Malawi   | 2007 | 0.686828 | 0.535867 |
| 7  | Malawi   | 2008 | 0.697033 | 0.54052  |
| 8  | Malawi   | 2009 | 0.707276 | 0.54586  |
| 9  | Malawi   | 2010 | 0.71033  | 0.546968 |
| 10 | Malawi   | 2011 | 0.714983 | 0.54886  |
| 11 | Malawi   | 2012 | 0.724143 | 0.555918 |
| 12 | Malawi   | 2013 | 0.733413 | 0.563464 |
| 13 | Malawi   | 2014 | 0.737841 | 0.569168 |
| 14 | Malawi   | 2015 | 0.74575  | 0.576821 |
| 15 | Malawi   | 2016 | 0.748773 | 0.583159 |
| 16 | Malawi   | 2017 | 0.754559 | 0.591801 |
| 17 | Malawi   | 2018 | 0.760637 | 0.599123 |
| 18 | Malawi   | 2019 | 0.765263 | 0.605597 |
| 19 | Malaysia | 1990 | 0.819196 | 0.788761 |
| 20 | Malaysia | 1991 | 0.846018 | 0.816191 |
| 21 | Malaysia | 1992 | 0.886443 | 0.853191 |
| 22 | Malaysia | 1993 | 0.94471  | 0.913312 |
| 23 | Malaysia | 1994 | 0.975225 | 0.954186 |
| 24 | Malaysia | 1995 | 0.982179 | 0.948723 |
| 25 | Malaysia | 1996 | 0.950804 | 0.889981 |
| 26 | Malaysia | 1997 | 0.965724 | 0.902726 |
| 27 | Malaysia | 1998 | 1.026153 | 0.991537 |
| 28 | Malaysia | 1999 | 1.047448 | 1.026159 |
| 29 | Malaysia | 2000 | 1.034293 | 1.007025 |
| 30 |          |      |          |          |
| 31 |          |      |          |          |
| 32 |          |      |          |          |
| 33 |          |      |          |          |
| 34 |          |      |          |          |
| 35 |          |      |          |          |
| 36 |          |      |          |          |
| 37 |          |      |          |          |
| 38 |          |      |          |          |
| 39 |          |      |          |          |
| 40 |          |      |          |          |
| 41 |          |      |          |          |
| 42 |          |      |          |          |
| 43 |          |      |          |          |
| 44 |          |      |          |          |
| 45 |          |      |          |          |
| 46 |          |      |          |          |

|    |          |      |          |          |
|----|----------|------|----------|----------|
| 1  |          |      |          |          |
| 2  |          |      |          |          |
| 3  |          |      |          |          |
| 4  |          |      |          |          |
| 5  | Malaysia | 2001 | 1.027312 | 0.987668 |
| 6  | Malaysia | 2002 | 1.078764 | 1.04399  |
| 7  | Malaysia | 2003 | 1.063797 | 1.039922 |
| 8  | Malaysia | 2004 | 1.060262 | 1.061847 |
| 9  | Malaysia | 2005 | 1.066861 | 1.080876 |
| 10 | Malaysia | 2006 | 1.07099  | 1.094214 |
| 11 | Malaysia | 2007 | 1.072336 | 1.107498 |
| 12 | Malaysia | 2008 | 1.059789 | 1.110449 |
| 13 | Malaysia | 2009 | 1.063617 | 1.123318 |
| 14 | Malaysia | 2010 | 1.057671 | 1.11054  |
| 15 | Malaysia | 2011 | 1.04982  | 1.098519 |
| 16 | Malaysia | 2012 | 1.067402 | 1.137766 |
| 17 | Malaysia | 2013 | 1.064808 | 1.180301 |
| 18 | Malaysia | 2014 | 1.056546 | 1.179    |
| 19 | Malaysia | 2015 | 1.053687 | 1.173967 |
| 20 | Malaysia | 2016 | 1.045563 | 1.136786 |
| 21 | Malaysia | 2017 | 1.04171  | 1.122423 |
| 22 | Malaysia | 2018 | 1.044457 | 1.117039 |
| 23 | Malaysia | 2019 | 1.041762 | 1.08757  |
| 24 | Maldives | 1990 | 0.963518 | 1.206453 |
| 25 | Maldives | 1991 | 0.972691 | 1.238021 |
| 26 | Maldives | 1992 | 0.98505  | 1.276931 |
| 27 | Maldives | 1993 | 0.95509  | 1.239805 |
| 28 | Maldives | 1994 | 0.900192 | 1.140108 |
| 29 | Maldives | 1995 | 0.914347 | 1.166679 |
| 30 |          |      |          |          |
| 31 |          |      |          |          |
| 32 |          |      |          |          |
| 33 |          |      |          |          |
| 34 |          |      |          |          |
| 35 |          |      |          |          |
| 36 |          |      |          |          |
| 37 |          |      |          |          |
| 38 |          |      |          |          |
| 39 |          |      |          |          |
| 40 |          |      |          |          |
| 41 |          |      |          |          |
| 42 |          |      |          |          |
| 43 |          |      |          |          |
| 44 |          |      |          |          |
| 45 |          |      |          |          |
| 46 |          |      |          |          |

1  
2  
3  
4  
5  
6  
7  
8  
9  
10  
11  
12  
13  
14  
15  
16  
17  
18  
19  
20  
21  
22  
23  
24  
25  
26  
27  
28  
29  
30  
31  
32  
33  
34  
35  
36  
37  
38  
39  
40  
41  
42  
43  
44  
45  
46

|          |      |          |          |
|----------|------|----------|----------|
| Maldives | 1996 | 0.962101 | 1.260357 |
| Maldives | 1997 | 0.99324  | 1.318302 |
| Maldives | 1998 | 0.950574 | 1.23224  |
| Maldives | 1999 | 0.950123 | 1.207546 |
| Maldives | 2000 | 0.963335 | 1.233702 |
| Maldives | 2001 | 0.952392 | 1.219721 |
| Maldives | 2002 | 0.85437  | 1.079451 |
| Maldives | 2003 | 0.855313 | 1.076779 |
| Maldives | 2004 | 0.863548 | 1.078919 |
| Maldives | 2005 | 0.867198 | 1.075533 |
| Maldives | 2006 | 0.878145 | 1.082157 |
| Maldives | 2007 | 0.896513 | 1.09889  |
| Maldives | 2008 | 0.915916 | 1.116226 |
| Maldives | 2009 | 0.944785 | 1.145004 |
| Maldives | 2010 | 0.961791 | 1.162282 |
| Maldives | 2011 | 0.957437 | 1.155309 |
| Maldives | 2012 | 0.951009 | 1.149364 |
| Maldives | 2013 | 0.938156 | 1.13562  |
| Maldives | 2014 | 0.919664 | 1.11528  |
| Maldives | 2015 | 0.897286 | 1.09207  |
| Maldives | 2016 | 0.902015 | 1.100388 |
| Maldives | 2017 | 0.903999 | 1.105606 |
| Maldives | 2018 | 0.905796 | 1.110964 |
| Maldives | 2019 | 0.90613  | 1.11559  |
| Mali     | 1990 | 1.052152 | 0.960348 |

|      |      |          |          |
|------|------|----------|----------|
| Mali | 1991 | 1.049099 | 0.963432 |
| Mali | 1992 | 1.04031  | 0.962519 |
| Mali | 1993 | 1.024426 | 0.95587  |
| Mali | 1994 | 1.014837 | 0.953214 |
| Mali | 1995 | 1.01442  | 0.958046 |
| Mali | 1996 | 1.009798 | 0.959951 |
| Mali | 1997 | 1.013619 | 0.970303 |
| Mali | 1998 | 1.006038 | 0.969867 |
| Mali | 1999 | 0.988446 | 0.959086 |
| Mali | 2000 | 0.979709 | 0.955419 |
| Mali | 2001 | 0.967442 | 0.950056 |
| Mali | 2002 | 0.956589 | 0.943906 |
| Mali | 2003 | 0.948678 | 0.941863 |
| Mali | 2004 | 0.931661 | 0.929066 |
| Mali | 2005 | 0.920049 | 0.920402 |
| Mali | 2006 | 0.912475 | 0.915756 |
| Mali | 2007 | 0.896128 | 0.902561 |
| Mali | 2008 | 0.880758 | 0.889383 |
| Mali | 2009 | 0.8671   | 0.8774   |
| Mali | 2010 | 0.862463 | 0.874125 |
| Mali | 2011 | 0.861756 | 0.875638 |
| Mali | 2012 | 0.860395 | 0.876241 |
| Mali | 2013 | 0.852067 | 0.868954 |
| Mali | 2014 | 0.849678 | 0.868136 |
| Mali | 2015 | 0.842445 | 0.862383 |

|    |       |      |          |          |
|----|-------|------|----------|----------|
| 1  |       |      |          |          |
| 2  |       |      |          |          |
| 3  |       |      |          |          |
| 4  |       |      |          |          |
| 5  | Mali  | 2016 | 0.832439 | 0.855942 |
| 6  | Mali  | 2017 | 0.822786 | 0.849405 |
| 7  | Mali  | 2018 | 0.827136 | 0.855255 |
| 8  | Mali  | 2019 | 0.830844 | 0.85997  |
| 9  |       |      |          |          |
| 10 | Malta | 1990 | 1.008276 | 0.651471 |
| 11 | Malta | 1991 | 1.030094 | 0.651632 |
| 12 | Malta | 1992 | 1.060652 | 0.662053 |
| 13 | Malta | 1993 | 1.091122 | 0.675794 |
| 14 | Malta | 1994 | 1.154814 | 0.722773 |
| 15 | Malta | 1995 | 1.172958 | 0.735947 |
| 16 | Malta | 1996 | 1.138106 | 0.716251 |
| 17 | Malta | 1997 | 1.119391 | 0.702479 |
| 18 | Malta | 1998 | 1.163283 | 0.728761 |
| 19 | Malta | 1999 | 1.16292  | 0.731829 |
| 20 | Malta | 2000 | 1.163634 | 0.732145 |
| 21 | Malta | 2001 | 1.136787 | 0.714885 |
| 22 | Malta | 2002 | 1.094725 | 0.687322 |
| 23 | Malta | 2003 | 1.085162 | 0.685129 |
| 24 | Malta | 2004 | 1.089569 | 0.692118 |
| 25 | Malta | 2005 | 1.035043 | 0.659262 |
| 26 | Malta | 2006 | 1.047596 | 0.668544 |
| 27 | Malta | 2007 | 1.038632 | 0.664038 |
| 28 | Malta | 2008 | 1.016727 | 0.651006 |
| 29 | Malta | 2009 | 1.034098 | 0.663307 |
| 30 | Malta | 2010 | 1.009965 | 0.647124 |
| 31 |       |      |          |          |
| 32 |       |      |          |          |
| 33 |       |      |          |          |
| 34 |       |      |          |          |
| 35 |       |      |          |          |
| 36 |       |      |          |          |
| 37 |       |      |          |          |
| 38 |       |      |          |          |
| 39 |       |      |          |          |
| 40 |       |      |          |          |
| 41 |       |      |          |          |
| 42 |       |      |          |          |
| 43 |       |      |          |          |
| 44 |       |      |          |          |
| 45 |       |      |          |          |
| 46 |       |      |          |          |

|    |                  |      |          |          |
|----|------------------|------|----------|----------|
| 1  |                  |      |          |          |
| 2  |                  |      |          |          |
| 3  |                  |      |          |          |
| 4  |                  |      |          |          |
| 5  | Malta            | 2011 | 1.002912 | 0.643467 |
| 6  | Malta            | 2012 | 1.017241 | 0.650393 |
| 7  | Malta            | 2013 | 1.027006 | 0.65451  |
| 8  | Malta            | 2014 | 1.031116 | 0.659429 |
| 9  | Malta            | 2015 | 1.140398 | 0.725348 |
| 10 | Malta            | 2016 | 1.132609 | 0.72308  |
| 11 | Malta            | 2017 | 1.126121 | 0.720151 |
| 12 | Malta            | 2018 | 1.114579 | 0.716802 |
| 13 | Malta            | 2019 | 1.098586 | 0.713248 |
| 14 | Malta            | 2019 | 1.098586 | 0.713248 |
| 15 | Malta            | 2019 | 1.098586 | 0.713248 |
| 16 | Malta            | 2019 | 1.098586 | 0.713248 |
| 17 | Marshall Islands | 1990 | 0.829497 | 0.73961  |
| 18 | Marshall Islands | 1991 | 0.84873  | 0.754036 |
| 19 | Marshall Islands | 1992 | 0.862116 | 0.764425 |
| 20 | Marshall Islands | 1993 | 0.895229 | 0.794611 |
| 21 | Marshall Islands | 1994 | 1.000765 | 0.922647 |
| 22 | Marshall Islands | 1995 | 1.014702 | 0.941943 |
| 23 | Marshall Islands | 1996 | 1.041135 | 0.970383 |
| 24 | Marshall Islands | 1997 | 1.044842 | 0.980008 |
| 25 | Marshall Islands | 1998 | 1.04679  | 0.986713 |
| 26 | Marshall Islands | 1999 | 1.041891 | 0.986813 |
| 27 | Marshall Islands | 2000 | 1.037892 | 0.986503 |
| 28 | Marshall Islands | 2001 | 1.034632 | 0.986928 |
| 29 | Marshall Islands | 2002 | 1.035458 | 0.991621 |
| 30 | Marshall Islands | 2003 | 1.033946 | 0.994506 |
| 31 | Marshall Islands | 2004 | 1.043391 | 1.007015 |
| 32 | Marshall Islands | 2005 | 1.033638 | 1.00178  |
| 33 | Marshall Islands | 2005 | 1.033638 | 1.00178  |
| 34 | Marshall Islands | 2005 | 1.033638 | 1.00178  |
| 35 | Marshall Islands | 2005 | 1.033638 | 1.00178  |
| 36 | Marshall Islands | 2005 | 1.033638 | 1.00178  |
| 37 | Marshall Islands | 2005 | 1.033638 | 1.00178  |
| 38 | Marshall Islands | 2005 | 1.033638 | 1.00178  |
| 39 |                  |      |          |          |
| 40 |                  |      |          |          |
| 41 |                  |      |          |          |
| 42 |                  |      |          |          |
| 43 |                  |      |          |          |
| 44 |                  |      |          |          |
| 45 |                  |      |          |          |
| 46 |                  |      |          |          |

1  
2  
3  
4  
5  
6  
7  
8  
9  
10  
11  
12  
13  
14  
15  
16  
17  
18  
19  
20  
21  
22  
23  
24  
25  
26  
27  
28  
29  
30  
31  
32  
33  
34  
35  
36  
37  
38  
39  
40  
41  
42  
43  
44  
45  
46

|                  |      |          |          |
|------------------|------|----------|----------|
| Marshall Islands | 2006 | 1.024225 | 0.996898 |
| Marshall Islands | 2007 | 1.005892 | 0.982809 |
| Marshall Islands | 2008 | 0.989552 | 0.970255 |
| Marshall Islands | 2009 | 0.978998 | 0.962731 |
| Marshall Islands | 2010 | 0.973948 | 0.960239 |
| Marshall Islands | 2011 | 0.966812 | 0.954487 |
| Marshall Islands | 2012 | 0.960175 | 0.948971 |
| Marshall Islands | 2013 | 0.955867 | 0.945321 |
| Marshall Islands | 2014 | 0.950784 | 0.939663 |
| Marshall Islands | 2015 | 0.947166 | 0.936217 |
| Marshall Islands | 2016 | 0.946444 | 0.934338 |
| Marshall Islands | 2017 | 0.948871 | 0.935285 |
| Marshall Islands | 2018 | 0.94816  | 0.933495 |
| Marshall Islands | 2019 | 0.948073 | 0.931827 |
| Mauritania       | 1990 | 1.292419 | 1.123301 |
| Mauritania       | 1991 | 1.304114 | 1.144613 |
| Mauritania       | 1992 | 1.311313 | 1.163473 |
| Mauritania       | 1993 | 1.316344 | 1.181659 |
| Mauritania       | 1994 | 1.321783 | 1.193751 |
| Mauritania       | 1995 | 1.330612 | 1.208804 |
| Mauritania       | 1996 | 1.334792 | 1.220411 |
| Mauritania       | 1997 | 1.337735 | 1.23014  |
| Mauritania       | 1998 | 1.342861 | 1.23923  |
| Mauritania       | 1999 | 1.355719 | 1.257931 |
| Mauritania       | 2000 | 1.354422 | 1.266274 |

|            |      |          |          |
|------------|------|----------|----------|
| Mauritania | 2001 | 1.338039 | 1.263431 |
| Mauritania | 2002 | 1.326071 | 1.263031 |
| Mauritania | 2003 | 1.32429  | 1.269958 |
| Mauritania | 2004 | 1.312932 | 1.26527  |
| Mauritania | 2005 | 1.308692 | 1.266842 |
| Mauritania | 2006 | 1.304456 | 1.274066 |
| Mauritania | 2007 | 1.286568 | 1.263329 |
| Mauritania | 2008 | 1.259677 | 1.245972 |
| Mauritania | 2009 | 1.226907 | 1.223864 |
| Mauritania | 2010 | 1.206542 | 1.21002  |
| Mauritania | 2011 | 1.194471 | 1.198175 |
| Mauritania | 2012 | 1.18269  | 1.187555 |
| Mauritania | 2013 | 1.170872 | 1.180314 |
| Mauritania | 2014 | 1.181396 | 1.189417 |
| Mauritania | 2015 | 1.185942 | 1.195127 |
| Mauritania | 2016 | 1.190154 | 1.203213 |
| Mauritania | 2017 | 1.186943 | 1.204661 |
| Mauritania | 2018 | 1.18427  | 1.206028 |
| Mauritania | 2019 | 1.182881 | 1.204325 |
| Mauritius  | 1990 | 0.93321  | 0.754336 |
| Mauritius  | 1991 | 0.950503 | 0.755029 |
| Mauritius  | 1992 | 1.044833 | 0.830833 |
| Mauritius  | 1993 | 0.972502 | 0.775092 |
| Mauritius  | 1994 | 0.996268 | 0.7839   |
| Mauritius  | 1995 | 0.988114 | 0.789355 |



|           |      |          |          |
|-----------|------|----------|----------|
| Mauritius | 1996 | 0.923973 | 0.738861 |
| Mauritius | 1997 | 0.899823 | 0.699261 |
| Mauritius | 1998 | 0.910683 | 0.702415 |
| Mauritius | 1999 | 0.928566 | 0.717855 |
| Mauritius | 2000 | 0.995053 | 0.77431  |
| Mauritius | 2001 | 0.979239 | 0.769047 |
| Mauritius | 2002 | 0.899328 | 0.7055   |
| Mauritius | 2003 | 0.943053 | 0.733968 |
| Mauritius | 2004 | 0.925262 | 0.723859 |
| Mauritius | 2005 | 0.92733  | 0.727248 |
| Mauritius | 2006 | 0.942548 | 0.745284 |
| Mauritius | 2007 | 0.934733 | 0.753928 |
| Mauritius | 2008 | 0.902499 | 0.735209 |
| Mauritius | 2009 | 0.855919 | 0.696554 |
| Mauritius | 2010 | 0.884717 | 0.710758 |
| Mauritius | 2011 | 0.843754 | 0.678107 |
| Mauritius | 2012 | 0.895397 | 0.714052 |
| Mauritius | 2013 | 0.870548 | 0.695416 |
| Mauritius | 2014 | 0.872555 | 0.701738 |
| Mauritius | 2015 | 0.849229 | 0.685232 |
| Mauritius | 2016 | 0.828713 | 0.669571 |
| Mauritius | 2017 | 0.889327 | 0.717066 |
| Mauritius | 2018 | 0.873638 | 0.706288 |
| Mauritius | 2019 | 0.865816 | 0.699819 |
| Mexico    | 1990 | 1.078398 | 1.048632 |

|        |      |          |          |
|--------|------|----------|----------|
| Mexico | 1991 | 1.075019 | 1.040023 |
| Mexico | 1992 | 1.086669 | 1.043003 |
| Mexico | 1993 | 1.091016 | 1.040778 |
| Mexico | 1994 | 1.082324 | 1.027802 |
| Mexico | 1995 | 1.095406 | 1.033573 |
| Mexico | 1996 | 1.094571 | 1.026731 |
| Mexico | 1997 | 1.094724 | 1.022765 |
| Mexico | 1998 | 1.102235 | 1.022629 |
| Mexico | 1999 | 1.120489 | 1.033242 |
| Mexico | 2000 | 1.097268 | 1.009582 |
| Mexico | 2001 | 1.101573 | 1.009819 |
| Mexico | 2002 | 1.080918 | 0.987715 |
| Mexico | 2003 | 1.074058 | 0.97873  |
| Mexico | 2004 | 1.071029 | 0.974993 |
| Mexico | 2005 | 1.053626 | 0.959082 |
| Mexico | 2006 | 1.049174 | 0.953395 |
| Mexico | 2007 | 1.047691 | 0.950921 |
| Mexico | 2008 | 1.020609 | 0.923375 |
| Mexico | 2009 | 1.031489 | 0.928038 |
| Mexico | 2010 | 1.033104 | 0.92865  |
| Mexico | 2011 | 1.016719 | 0.911677 |
| Mexico | 2012 | 1.010454 | 0.902523 |
| Mexico | 2013 | 0.984236 | 0.875506 |
| Mexico | 2014 | 0.978046 | 0.867256 |
| Mexico | 2015 | 0.960093 | 0.848844 |

|    |                                  |      |          |          |
|----|----------------------------------|------|----------|----------|
| 1  |                                  |      |          |          |
| 2  |                                  |      |          |          |
| 3  |                                  |      |          |          |
| 4  |                                  |      |          |          |
| 5  | Mexico                           | 2016 | 0.946389 | 0.834406 |
| 6  | Mexico                           | 2017 | 0.919663 | 0.808347 |
| 7  | Mexico                           | 2018 | 0.92066  | 0.806294 |
| 8  | Mexico                           | 2019 | 0.912661 | 0.794804 |
| 9  |                                  |      |          |          |
| 10 | Micronesia (Federated States of) | 1990 | 1.044948 | 0.976014 |
| 11 | Micronesia (Federated States of) | 1991 | 1.063367 | 0.987065 |
| 12 | Micronesia (Federated States of) | 1992 | 1.085287 | 1.00053  |
| 13 | Micronesia (Federated States of) | 1993 | 1.104225 | 1.010412 |
| 14 | Micronesia (Federated States of) | 1994 | 1.127485 | 1.023454 |
| 15 | Micronesia (Federated States of) | 1995 | 1.154087 | 1.039054 |
| 16 | Micronesia (Federated States of) | 1996 | 1.175387 | 1.049479 |
| 17 | Micronesia (Federated States of) | 1997 | 1.192982 | 1.057541 |
| 18 | Micronesia (Federated States of) | 1998 | 1.205251 | 1.061571 |
| 19 | Micronesia (Federated States of) | 1999 | 1.216182 | 1.065192 |
| 20 | Micronesia (Federated States of) | 2000 | 1.22136  | 1.064296 |
| 21 | Micronesia (Federated States of) | 2001 | 1.227829 | 1.06496  |
| 22 | Micronesia (Federated States of) | 2002 | 1.23739  | 1.069029 |
| 23 | Micronesia (Federated States of) | 2003 | 1.224554 | 1.054574 |
| 24 | Micronesia (Federated States of) | 2004 | 1.221401 | 1.049043 |
| 25 | Micronesia (Federated States of) | 2005 | 1.212073 | 1.039666 |
| 26 | Micronesia (Federated States of) | 2006 | 1.227931 | 1.050787 |
| 27 | Micronesia (Federated States of) | 2007 | 1.19562  | 1.021078 |
| 28 | Micronesia (Federated States of) | 2008 | 1.162752 | 0.99167  |
| 29 | Micronesia (Federated States of) | 2009 | 1.129838 | 0.96289  |
| 30 | Micronesia (Federated States of) | 2010 | 1.101329 | 0.937482 |
| 31 |                                  |      |          |          |
| 32 |                                  |      |          |          |
| 33 |                                  |      |          |          |
| 34 |                                  |      |          |          |
| 35 |                                  |      |          |          |
| 36 |                                  |      |          |          |
| 37 |                                  |      |          |          |
| 38 |                                  |      |          |          |
| 39 |                                  |      |          |          |
| 40 |                                  |      |          |          |
| 41 |                                  |      |          |          |
| 42 |                                  |      |          |          |
| 43 |                                  |      |          |          |
| 44 |                                  |      |          |          |
| 45 |                                  |      |          |          |
| 46 |                                  |      |          |          |

|    |                                  |      |          |          |
|----|----------------------------------|------|----------|----------|
| 1  |                                  |      |          |          |
| 2  |                                  |      |          |          |
| 3  |                                  |      |          |          |
| 4  |                                  |      |          |          |
| 5  | Micronesia (Federated States of) | 2011 | 1.064706 | 0.907    |
| 6  | Micronesia (Federated States of) | 2012 | 1.034839 | 0.882568 |
| 7  | Micronesia (Federated States of) | 2013 | 1.009272 | 0.861923 |
| 8  | Micronesia (Federated States of) | 2014 | 0.988996 | 0.845971 |
| 9  | Micronesia (Federated States of) | 2015 | 0.97729  | 0.835961 |
| 10 | Micronesia (Federated States of) | 2016 | 0.962942 | 0.825061 |
| 11 | Micronesia (Federated States of) | 2017 | 0.959648 | 0.823572 |
| 12 | Micronesia (Federated States of) | 2018 | 0.955921 | 0.821916 |
| 13 | Micronesia (Federated States of) | 2019 | 0.951491 | 0.819525 |
| 14 | Monaco                           | 1990 | 0.925141 | 0.509605 |
| 15 | Monaco                           | 1991 | 0.927871 | 0.511247 |
| 16 | Monaco                           | 1992 | 0.935894 | 0.515033 |
| 17 | Monaco                           | 1993 | 0.947152 | 0.520603 |
| 18 | Monaco                           | 1994 | 0.958841 | 0.52651  |
| 19 | Monaco                           | 1995 | 0.968499 | 0.532215 |
| 20 | Monaco                           | 1996 | 0.976394 | 0.538766 |
| 21 | Monaco                           | 1997 | 0.991226 | 0.548622 |
| 22 | Monaco                           | 1998 | 1.010798 | 0.560403 |
| 23 | Monaco                           | 1999 | 1.034407 | 0.573567 |
| 24 | Monaco                           | 2000 | 1.055584 | 0.586374 |
| 25 | Monaco                           | 2001 | 1.068534 | 0.59852  |
| 26 | Monaco                           | 2002 | 1.075324 | 0.609122 |
| 27 | Monaco                           | 2003 | 1.081212 | 0.620175 |
| 28 | Monaco                           | 2004 | 1.086635 | 0.630366 |
| 29 | Monaco                           | 2005 | 1.088433 | 0.639145 |
| 30 |                                  |      |          |          |
| 31 |                                  |      |          |          |
| 32 |                                  |      |          |          |
| 33 |                                  |      |          |          |
| 34 |                                  |      |          |          |
| 35 |                                  |      |          |          |
| 36 |                                  |      |          |          |
| 37 |                                  |      |          |          |
| 38 |                                  |      |          |          |
| 39 |                                  |      |          |          |
| 40 |                                  |      |          |          |
| 41 |                                  |      |          |          |
| 42 |                                  |      |          |          |
| 43 |                                  |      |          |          |
| 44 |                                  |      |          |          |
| 45 |                                  |      |          |          |
| 46 |                                  |      |          |          |

1  
2  
3  
4  
5  
6  
7  
8  
9  
10  
11  
12  
13  
14  
15  
16  
17  
18  
19  
20  
21  
22  
23  
24  
25  
26  
27  
28  
29  
30  
31  
32  
33  
34  
35  
36  
37  
38  
39  
40  
41  
42  
43  
44  
45  
46

|          |      |          |          |
|----------|------|----------|----------|
| Monaco   | 2006 | 1.082645 | 0.645151 |
| Monaco   | 2007 | 1.070951 | 0.648902 |
| Monaco   | 2008 | 1.059886 | 0.653042 |
| Monaco   | 2009 | 1.054282 | 0.658945 |
| Monaco   | 2010 | 1.052876 | 0.666098 |
| Monaco   | 2011 | 1.050548 | 0.672052 |
| Monaco   | 2012 | 1.046823 | 0.678352 |
| Monaco   | 2013 | 1.03124  | 0.674487 |
| Monaco   | 2014 | 1.025477 | 0.675192 |
| Monaco   | 2015 | 1.022501 | 0.676323 |
| Monaco   | 2016 | 1.017735 | 0.675253 |
| Monaco   | 2017 | 1.011475 | 0.673635 |
| Monaco   | 2018 | 1.004845 | 0.672659 |
| Monaco   | 2019 | 0.997704 | 0.670993 |
| Mongolia | 1990 | 1.068489 | 0.837677 |
| Mongolia | 1991 | 1.083221 | 0.846939 |
| Mongolia | 1992 | 1.081256 | 0.854461 |
| Mongolia | 1993 | 1.092407 | 0.854763 |
| Mongolia | 1994 | 1.087824 | 0.850761 |
| Mongolia | 1995 | 1.079002 | 0.852306 |
| Mongolia | 1996 | 1.060124 | 0.840739 |
| Mongolia | 1997 | 1.082339 | 0.856448 |
| Mongolia | 1998 | 1.074045 | 0.833624 |
| Mongolia | 1999 | 1.084455 | 0.837111 |
| Mongolia | 2000 | 1.047604 | 0.821764 |

|            |      |          |          |
|------------|------|----------|----------|
| Mongolia   | 2001 | 0.976921 | 0.761449 |
| Mongolia   | 2002 | 0.921562 | 0.715086 |
| Mongolia   | 2003 | 0.882353 | 0.687733 |
| Mongolia   | 2004 | 0.854392 | 0.675443 |
| Mongolia   | 2005 | 0.832971 | 0.664011 |
| Mongolia   | 2006 | 0.833794 | 0.662218 |
| Mongolia   | 2007 | 0.823721 | 0.663589 |
| Mongolia   | 2008 | 0.819758 | 0.675399 |
| Mongolia   | 2009 | 0.832738 | 0.69269  |
| Mongolia   | 2010 | 0.825495 | 0.676345 |
| Mongolia   | 2011 | 0.81695  | 0.665265 |
| Mongolia   | 2012 | 0.819276 | 0.684519 |
| Mongolia   | 2013 | 0.808343 | 0.682186 |
| Mongolia   | 2014 | 0.795602 | 0.677174 |
| Mongolia   | 2015 | 0.795543 | 0.676357 |
| Mongolia   | 2016 | 0.790086 | 0.663606 |
| Mongolia   | 2017 | 0.794348 | 0.661505 |
| Mongolia   | 2018 | 0.793758 | 0.653293 |
| Mongolia   | 2019 | 0.788673 | 0.633037 |
| Montenegro | 1990 | 0.730016 | 0.531763 |
| Montenegro | 1991 | 0.733277 | 0.528923 |
| Montenegro | 1992 | 0.752784 | 0.539443 |
| Montenegro | 1993 | 0.760196 | 0.546079 |
| Montenegro | 1994 | 0.793137 | 0.571782 |
| Montenegro | 1995 | 0.803658 | 0.58153  |

1  
2  
3  
4  
5  
6  
7  
8  
9  
10  
11  
12  
13  
14  
15  
16  
17  
18  
19  
20  
21  
22  
23  
24  
25  
26  
27  
28  
29  
30  
31  
32  
33  
34  
35  
36  
37  
38  
39  
40  
41  
42  
43  
44  
45  
46

|            |      |          |          |
|------------|------|----------|----------|
| Montenegro | 1996 | 0.816688 | 0.593459 |
| Montenegro | 1997 | 0.803945 | 0.587557 |
| Montenegro | 1998 | 0.800749 | 0.587413 |
| Montenegro | 1999 | 0.806197 | 0.590958 |
| Montenegro | 2000 | 0.831277 | 0.61343  |
| Montenegro | 2001 | 0.83478  | 0.624572 |
| Montenegro | 2002 | 0.812396 | 0.611387 |
| Montenegro | 2003 | 0.800159 | 0.604112 |
| Montenegro | 2004 | 0.776479 | 0.583612 |
| Montenegro | 2005 | 0.749911 | 0.558299 |
| Montenegro | 2006 | 0.761925 | 0.567128 |
| Montenegro | 2007 | 0.800333 | 0.592415 |
| Montenegro | 2008 | 0.829676 | 0.616523 |
| Montenegro | 2009 | 0.849739 | 0.637266 |
| Montenegro | 2010 | 0.862346 | 0.649889 |
| Montenegro | 2011 | 0.845212 | 0.642788 |
| Montenegro | 2012 | 0.851893 | 0.648937 |
| Montenegro | 2013 | 0.843268 | 0.645223 |
| Montenegro | 2014 | 0.848705 | 0.651204 |
| Montenegro | 2015 | 0.842623 | 0.641021 |
| Montenegro | 2016 | 0.809543 | 0.606147 |
| Montenegro | 2017 | 0.802626 | 0.594613 |
| Montenegro | 2018 | 0.825529 | 0.60972  |
| Montenegro | 2019 | 0.810302 | 0.592792 |
| Morocco    | 1990 | 0.99491  | 0.878909 |

|         |      |          |          |
|---------|------|----------|----------|
| Morocco | 1991 | 0.991678 | 0.881717 |
| Morocco | 1992 | 0.946036 | 0.847594 |
| Morocco | 1993 | 0.935928 | 0.840068 |
| Morocco | 1994 | 0.94912  | 0.849024 |
| Morocco | 1995 | 0.952789 | 0.849879 |
| Morocco | 1996 | 0.973631 | 0.873777 |
| Morocco | 1997 | 0.987708 | 0.885371 |
| Morocco | 1998 | 0.96864  | 0.862799 |
| Morocco | 1999 | 0.966075 | 0.851575 |
| Morocco | 2000 | 1.027192 | 0.934749 |
| Morocco | 2001 | 1.1055   | 1.039632 |
| Morocco | 2002 | 1.172219 | 1.105859 |
| Morocco | 2003 | 1.178042 | 1.112077 |
| Morocco | 2004 | 1.210291 | 1.158825 |
| Morocco | 2005 | 1.232854 | 1.193653 |
| Morocco | 2006 | 1.241772 | 1.213695 |
| Morocco | 2007 | 1.25736  | 1.236321 |
| Morocco | 2008 | 1.258971 | 1.247946 |
| Morocco | 2009 | 1.258156 | 1.25791  |
| Morocco | 2010 | 1.260311 | 1.270169 |
| Morocco | 2011 | 1.257748 | 1.277081 |
| Morocco | 2012 | 1.235274 | 1.256931 |
| Morocco | 2013 | 1.049889 | 1.040043 |
| Morocco | 2014 | 1.068511 | 1.042004 |
| Morocco | 2015 | 1.085833 | 1.043414 |



|            |      |          |          |
|------------|------|----------|----------|
| Morocco    | 2016 | 1.097535 | 1.040243 |
| Morocco    | 2017 | 1.107104 | 1.035671 |
| Morocco    | 2018 | 1.112476 | 1.03045  |
| Morocco    | 2019 | 1.116306 | 1.025441 |
| Mozambique | 1990 | 0.7455   | 0.632955 |
| Mozambique | 1991 | 0.740092 | 0.623329 |
| Mozambique | 1992 | 0.735712 | 0.617705 |
| Mozambique | 1993 | 0.723898 | 0.608977 |
| Mozambique | 1994 | 0.719732 | 0.605701 |
| Mozambique | 1995 | 0.713228 | 0.598496 |
| Mozambique | 1996 | 0.714012 | 0.596174 |
| Mozambique | 1997 | 0.715332 | 0.594212 |
| Mozambique | 1998 | 0.710254 | 0.587737 |
| Mozambique | 1999 | 0.702769 | 0.579659 |
| Mozambique | 2000 | 0.692727 | 0.56899  |
| Mozambique | 2001 | 0.678268 | 0.555227 |
| Mozambique | 2002 | 0.669768 | 0.545593 |
| Mozambique | 2003 | 0.664322 | 0.539428 |
| Mozambique | 2004 | 0.664309 | 0.538267 |
| Mozambique | 2005 | 0.67067  | 0.543276 |
| Mozambique | 2006 | 0.666668 | 0.537137 |
| Mozambique | 2007 | 0.666481 | 0.536097 |
| Mozambique | 2008 | 0.66311  | 0.534174 |
| Mozambique | 2009 | 0.663878 | 0.535535 |
| Mozambique | 2010 | 0.664697 | 0.536946 |

|    |            |      |          |          |
|----|------------|------|----------|----------|
| 1  |            |      |          |          |
| 2  |            |      |          |          |
| 3  |            |      |          |          |
| 4  |            |      |          |          |
| 5  | Mozambique | 2011 | 0.665384 | 0.538654 |
| 6  | Mozambique | 2012 | 0.666639 | 0.540631 |
| 7  | Mozambique | 2013 | 0.667253 | 0.542927 |
| 8  | Mozambique | 2014 | 0.670594 | 0.547312 |
| 9  | Mozambique | 2015 | 0.676028 | 0.553124 |
| 10 | Mozambique | 2016 | 0.678167 | 0.557826 |
| 11 | Mozambique | 2017 | 0.68422  | 0.56494  |
| 12 | Mozambique | 2018 | 0.686623 | 0.567848 |
| 13 | Mozambique | 2019 | 0.689936 | 0.571072 |
| 14 | Myanmar    | 1990 | 1.18372  | 0.956469 |
| 15 | Myanmar    | 1991 | 1.186191 | 0.955607 |
| 16 | Myanmar    | 1992 | 1.19093  | 0.957006 |
| 17 | Myanmar    | 1993 | 1.194359 | 0.957396 |
| 18 | Myanmar    | 1994 | 1.1991   | 0.959002 |
| 19 | Myanmar    | 1995 | 1.201551 | 0.957968 |
| 20 | Myanmar    | 1996 | 1.201112 | 0.955698 |
| 21 | Myanmar    | 1997 | 1.200431 | 0.953416 |
| 22 | Myanmar    | 1998 | 1.201065 | 0.952161 |
| 23 | Myanmar    | 1999 | 1.200264 | 0.950136 |
| 24 | Myanmar    | 2000 | 1.205709 | 0.953426 |
| 25 | Myanmar    | 2001 | 1.200051 | 0.949125 |
| 26 | Myanmar    | 2002 | 1.197862 | 0.947276 |
| 27 | Myanmar    | 2003 | 1.20639  | 0.952919 |
| 28 | Myanmar    | 2004 | 1.192564 | 0.942485 |
| 29 | Myanmar    | 2005 | 1.178545 | 0.930368 |
| 30 |            |      |          |          |
| 31 |            |      |          |          |
| 32 |            |      |          |          |
| 33 |            |      |          |          |
| 34 |            |      |          |          |
| 35 |            |      |          |          |
| 36 |            |      |          |          |
| 37 |            |      |          |          |
| 38 |            |      |          |          |
| 39 |            |      |          |          |
| 40 |            |      |          |          |
| 41 |            |      |          |          |
| 42 |            |      |          |          |
| 43 |            |      |          |          |
| 44 |            |      |          |          |
| 45 |            |      |          |          |
| 46 |            |      |          |          |

1  
2  
3  
4  
5  
6  
7  
8  
9  
10  
11  
12  
13  
14  
15  
16  
17  
18  
19  
20  
21  
22  
23  
24  
25  
26  
27  
28  
29  
30  
31  
32  
33  
34  
35  
36  
37  
38  
39  
40  
41  
42  
43  
44  
45  
46

|         |      |          |          |
|---------|------|----------|----------|
| Myanmar | 2006 | 1.17357  | 0.924872 |
| Myanmar | 2007 | 1.161685 | 0.914034 |
| Myanmar | 2008 | 1.150781 | 0.9032   |
| Myanmar | 2009 | 1.127682 | 0.883668 |
| Myanmar | 2010 | 1.099544 | 0.859687 |
| Myanmar | 2011 | 1.071159 | 0.835402 |
| Myanmar | 2012 | 1.05088  | 0.816291 |
| Myanmar | 2013 | 1.050014 | 0.812047 |
| Myanmar | 2014 | 1.048675 | 0.807729 |
| Myanmar | 2015 | 1.048365 | 0.80387  |
| Myanmar | 2016 | 1.049722 | 0.801738 |
| Myanmar | 2017 | 1.060853 | 0.807818 |
| Myanmar | 2018 | 1.06684  | 0.8106   |
| Myanmar | 2019 | 1.070598 | 0.810062 |
| Namibia | 1990 | 0.520952 | 0.414139 |
| Namibia | 1991 | 0.518697 | 0.41023  |
| Namibia | 1992 | 0.514996 | 0.405404 |
| Namibia | 1993 | 0.516465 | 0.404232 |
| Namibia | 1994 | 0.514588 | 0.401503 |
| Namibia | 1995 | 0.514977 | 0.400811 |
| Namibia | 1996 | 0.512347 | 0.398035 |
| Namibia | 1997 | 0.520707 | 0.40232  |
| Namibia | 1998 | 0.528704 | 0.406669 |
| Namibia | 1999 | 0.536913 | 0.411569 |
| Namibia | 2000 | 0.542403 | 0.414466 |

|         |      |          |          |
|---------|------|----------|----------|
| Namibia | 2001 | 0.536134 | 0.40849  |
| Namibia | 2002 | 0.535634 | 0.406544 |
| Namibia | 2003 | 0.527334 | 0.398785 |
| Namibia | 2004 | 0.515515 | 0.38807  |
| Namibia | 2005 | 0.50934  | 0.380508 |
| Namibia | 2006 | 0.512883 | 0.379323 |
| Namibia | 2007 | 0.520243 | 0.380621 |
| Namibia | 2008 | 0.525957 | 0.380947 |
| Namibia | 2009 | 0.537255 | 0.385315 |
| Namibia | 2010 | 0.542963 | 0.386363 |
| Namibia | 2011 | 0.547274 | 0.385731 |
| Namibia | 2012 | 0.562226 | 0.393271 |
| Namibia | 2013 | 0.570154 | 0.396655 |
| Namibia | 2014 | 0.579949 | 0.402086 |
| Namibia | 2015 | 0.589423 | 0.407695 |
| Namibia | 2016 | 0.596258 | 0.411905 |
| Namibia | 2017 | 0.601077 | 0.414841 |
| Namibia | 2018 | 0.606703 | 0.418179 |
| Namibia | 2019 | 0.61335  | 0.422065 |
| Nauru   | 1990 | 0.841129 | 0.90935  |
| Nauru   | 1991 | 0.836849 | 0.90501  |
| Nauru   | 1992 | 0.838949 | 0.908351 |
| Nauru   | 1993 | 0.81655  | 0.888291 |
| Nauru   | 1994 | 0.827685 | 0.897083 |
| Nauru   | 1995 | 0.825315 | 0.892624 |

|    |       |      |          |          |
|----|-------|------|----------|----------|
| 1  |       |      |          |          |
| 2  |       |      |          |          |
| 3  |       |      |          |          |
| 4  |       |      |          |          |
| 5  | Nauru | 1996 | 0.835952 | 0.896632 |
| 6  | Nauru | 1997 | 0.847038 | 0.900004 |
| 7  | Nauru | 1998 | 0.859692 | 0.901619 |
| 8  | Nauru | 1999 | 0.855559 | 0.887218 |
| 9  | Nauru | 2000 | 0.855925 | 0.875318 |
| 10 | Nauru | 2001 | 0.857772 | 0.863824 |
| 11 | Nauru | 2002 | 0.845386 | 0.844801 |
| 12 | Nauru | 2003 | 0.839563 | 0.830172 |
| 13 | Nauru | 2004 | 0.843791 | 0.82551  |
| 14 | Nauru | 2005 | 0.830454 | 0.805166 |
| 15 | Nauru | 2006 | 0.821763 | 0.78876  |
| 16 | Nauru | 2007 | 0.806174 | 0.767626 |
| 17 | Nauru | 2008 | 0.793628 | 0.750901 |
| 18 | Nauru | 2009 | 0.787585 | 0.740255 |
| 19 | Nauru | 2010 | 0.783428 | 0.733114 |
| 20 | Nauru | 2011 | 0.782513 | 0.727983 |
| 21 | Nauru | 2012 | 0.78002  | 0.722149 |
| 22 | Nauru | 2013 | 0.779317 | 0.718327 |
| 23 | Nauru | 2014 | 0.776438 | 0.713153 |
| 24 | Nauru | 2015 | 0.78012  | 0.712964 |
| 25 | Nauru | 2016 | 0.786155 | 0.71382  |
| 26 | Nauru | 2017 | 0.797984 | 0.719267 |
| 27 | Nauru | 2018 | 0.809922 | 0.723824 |
| 28 | Nauru | 2019 | 0.822037 | 0.727821 |
| 29 | Nepal | 1990 | 1.006487 | 0.88658  |
| 30 |       |      |          |          |
| 31 |       |      |          |          |
| 32 |       |      |          |          |
| 33 |       |      |          |          |
| 34 |       |      |          |          |
| 35 |       |      |          |          |
| 36 |       |      |          |          |
| 37 |       |      |          |          |
| 38 |       |      |          |          |
| 39 |       |      |          |          |
| 40 |       |      |          |          |
| 41 |       |      |          |          |
| 42 |       |      |          |          |
| 43 |       |      |          |          |
| 44 |       |      |          |          |
| 45 |       |      |          |          |
| 46 |       |      |          |          |

|       |      |          |          |
|-------|------|----------|----------|
| Nepal | 1991 | 1.008787 | 0.889125 |
| Nepal | 1992 | 1.017032 | 0.897647 |
| Nepal | 1993 | 1.009764 | 0.893959 |
| Nepal | 1994 | 0.999923 | 0.887975 |
| Nepal | 1995 | 0.980684 | 0.874587 |
| Nepal | 1996 | 0.960356 | 0.859834 |
| Nepal | 1997 | 0.932334 | 0.838205 |
| Nepal | 1998 | 0.9169   | 0.826599 |
| Nepal | 1999 | 0.913889 | 0.824936 |
| Nepal | 2000 | 0.891626 | 0.807733 |
| Nepal | 2001 | 0.885184 | 0.803387 |
| Nepal | 2002 | 0.88509  | 0.80353  |
| Nepal | 2003 | 0.886223 | 0.804379 |
| Nepal | 2004 | 0.88261  | 0.801964 |
| Nepal | 2005 | 0.88549  | 0.803022 |
| Nepal | 2006 | 0.885284 | 0.802625 |
| Nepal | 2007 | 0.895269 | 0.810404 |
| Nepal | 2008 | 0.906467 | 0.818901 |
| Nepal | 2009 | 0.920021 | 0.829422 |
| Nepal | 2010 | 0.946883 | 0.850073 |
| Nepal | 2011 | 0.956762 | 0.857514 |
| Nepal | 2012 | 0.976914 | 0.871798 |
| Nepal | 2013 | 0.994293 | 0.883126 |
| Nepal | 2014 | 1.016476 | 0.898038 |
| Nepal | 2015 | 1.035396 | 0.907818 |

|    |             |      |          |          |
|----|-------------|------|----------|----------|
| 1  |             |      |          |          |
| 2  |             |      |          |          |
| 3  |             |      |          |          |
| 4  |             |      |          |          |
| 5  | Nepal       | 2016 | 1.049671 | 0.914186 |
| 6  | Nepal       | 2017 | 1.063584 | 0.920054 |
| 7  | Nepal       | 2018 | 1.076166 | 0.92446  |
| 8  | Nepal       | 2019 | 1.087308 | 0.926945 |
| 9  | Nepal       | 2019 | 1.087308 | 0.926945 |
| 10 | Netherlands | 1990 | 1.447557 | 0.744821 |
| 11 | Netherlands | 1991 | 1.476313 | 0.748788 |
| 12 | Netherlands | 1992 | 1.479029 | 0.741339 |
| 13 | Netherlands | 1993 | 1.466228 | 0.727559 |
| 14 | Netherlands | 1994 | 1.509769 | 0.744292 |
| 15 | Netherlands | 1995 | 1.525182 | 0.750735 |
| 16 | Netherlands | 1996 | 1.511319 | 0.746839 |
| 17 | Netherlands | 1997 | 1.502871 | 0.745412 |
| 18 | Netherlands | 1998 | 1.468095 | 0.728972 |
| 19 | Netherlands | 1999 | 1.439072 | 0.71541  |
| 20 | Netherlands | 2000 | 1.39814  | 0.697868 |
| 21 | Netherlands | 2001 | 1.413555 | 0.709338 |
| 22 | Netherlands | 2002 | 1.425754 | 0.719386 |
| 23 | Netherlands | 2003 | 1.388924 | 0.704545 |
| 24 | Netherlands | 2004 | 1.400944 | 0.709384 |
| 25 | Netherlands | 2005 | 1.401287 | 0.709922 |
| 26 | Netherlands | 2006 | 1.401839 | 0.710847 |
| 27 | Netherlands | 2007 | 1.402669 | 0.714385 |
| 28 | Netherlands | 2008 | 1.406942 | 0.72216  |
| 29 | Netherlands | 2009 | 1.40736  | 0.727049 |
| 30 | Netherlands | 2010 | 1.421272 | 0.736793 |
| 31 |             |      |          |          |
| 32 |             |      |          |          |
| 33 |             |      |          |          |
| 34 |             |      |          |          |
| 35 |             |      |          |          |
| 36 |             |      |          |          |
| 37 |             |      |          |          |
| 38 |             |      |          |          |
| 39 |             |      |          |          |
| 40 |             |      |          |          |
| 41 |             |      |          |          |
| 42 |             |      |          |          |
| 43 |             |      |          |          |
| 44 |             |      |          |          |
| 45 |             |      |          |          |
| 46 |             |      |          |          |

|    |             |      |          |          |
|----|-------------|------|----------|----------|
| 1  |             |      |          |          |
| 2  |             |      |          |          |
| 3  |             |      |          |          |
| 4  |             |      |          |          |
| 5  | Netherlands | 2011 | 1.446806 | 0.757099 |
| 6  | Netherlands | 2012 | 1.442136 | 0.762483 |
| 7  | Netherlands | 2013 | 1.430792 | 0.767487 |
| 8  | Netherlands | 2014 | 1.440957 | 0.786282 |
| 9  | Netherlands | 2015 | 1.412873 | 0.785196 |
| 10 | Netherlands | 2016 | 1.402363 | 0.791495 |
| 11 | Netherlands | 2017 | 1.364227 | 0.786008 |
| 12 | Netherlands | 2018 | 1.345275 | 0.792336 |
| 13 | Netherlands | 2019 | 1.31752  | 0.791067 |
| 14 | Netherlands | 2019 | 1.31752  | 0.791067 |
| 15 | Netherlands | 2019 | 1.31752  | 0.791067 |
| 16 | Netherlands | 2019 | 1.31752  | 0.791067 |
| 17 | New Zealand | 1990 | 1.066192 | 0.705987 |
| 18 | New Zealand | 1991 | 1.063794 | 0.698293 |
| 19 | New Zealand | 1992 | 0.993804 | 0.647648 |
| 20 | New Zealand | 1993 | 0.990158 | 0.641685 |
| 21 | New Zealand | 1994 | 0.975831 | 0.628564 |
| 22 | New Zealand | 1995 | 0.987665 | 0.632708 |
| 23 | New Zealand | 1996 | 1.006324 | 0.639629 |
| 24 | New Zealand | 1997 | 0.977481 | 0.622835 |
| 25 | New Zealand | 1998 | 0.981552 | 0.627138 |
| 26 | New Zealand | 1999 | 0.975372 | 0.624972 |
| 27 | New Zealand | 2000 | 0.962181 | 0.62377  |
| 28 | New Zealand | 2001 | 0.943874 | 0.613128 |
| 29 | New Zealand | 2002 | 0.97546  | 0.637451 |
| 30 | New Zealand | 2003 | 0.971302 | 0.637979 |
| 31 | New Zealand | 2004 | 0.993113 | 0.655944 |
| 32 | New Zealand | 2005 | 0.992803 | 0.66123  |
| 33 | New Zealand | 2005 | 0.992803 | 0.66123  |
| 34 | New Zealand | 2005 | 0.992803 | 0.66123  |
| 35 | New Zealand | 2005 | 0.992803 | 0.66123  |
| 36 | New Zealand | 2005 | 0.992803 | 0.66123  |
| 37 | New Zealand | 2005 | 0.992803 | 0.66123  |
| 38 | New Zealand | 2005 | 0.992803 | 0.66123  |
| 39 |             |      |          |          |
| 40 |             |      |          |          |
| 41 |             |      |          |          |
| 42 |             |      |          |          |
| 43 |             |      |          |          |
| 44 |             |      |          |          |
| 45 |             |      |          |          |
| 46 |             |      |          |          |



1  
2  
3  
4  
5  
6  
7  
8  
9  
10  
11  
12  
13  
14  
15  
16  
17  
18  
19  
20  
21  
22  
23  
24  
25  
26  
27  
28  
29  
30  
31  
32  
33  
34  
35  
36  
37  
38  
39  
40  
41  
42  
43  
44  
45  
46

|             |      |          |          |
|-------------|------|----------|----------|
| New Zealand | 2006 | 0.984374 | 0.661881 |
| New Zealand | 2007 | 0.956275 | 0.65261  |
| New Zealand | 2008 | 0.960295 | 0.664472 |
| New Zealand | 2009 | 0.944662 | 0.656956 |
| New Zealand | 2010 | 0.959474 | 0.671581 |
| New Zealand | 2011 | 0.954743 | 0.674297 |
| New Zealand | 2012 | 0.930048 | 0.664193 |
| New Zealand | 2013 | 0.924215 | 0.667159 |
| New Zealand | 2014 | 0.91942  | 0.665934 |
| New Zealand | 2015 | 0.941312 | 0.687821 |
| New Zealand | 2016 | 0.929588 | 0.68481  |
| New Zealand | 2017 | 0.927328 | 0.689256 |
| New Zealand | 2018 | 0.893293 | 0.670898 |
| New Zealand | 2019 | 0.881984 | 0.667259 |
| Nicaragua   | 1990 | 0.522688 | 0.397753 |
| Nicaragua   | 1991 | 0.514671 | 0.395575 |
| Nicaragua   | 1992 | 0.515144 | 0.395474 |
| Nicaragua   | 1993 | 0.52376  | 0.401308 |
| Nicaragua   | 1994 | 0.495389 | 0.382344 |
| Nicaragua   | 1995 | 0.657199 | 0.544353 |
| Nicaragua   | 1996 | 0.644636 | 0.542242 |
| Nicaragua   | 1997 | 0.630431 | 0.535664 |
| Nicaragua   | 1998 | 0.618795 | 0.531651 |
| Nicaragua   | 1999 | 0.572153 | 0.497733 |
| Nicaragua   | 2000 | 0.578434 | 0.508295 |

|           |      |          |          |
|-----------|------|----------|----------|
| Nicaragua | 2001 | 0.593106 | 0.527615 |
| Nicaragua | 2002 | 0.583986 | 0.525227 |
| Nicaragua | 2003 | 0.551447 | 0.49958  |
| Nicaragua | 2004 | 0.557455 | 0.50602  |
| Nicaragua | 2005 | 0.538036 | 0.48986  |
| Nicaragua | 2006 | 0.52597  | 0.477105 |
| Nicaragua | 2007 | 0.544361 | 0.49303  |
| Nicaragua | 2008 | 0.539564 | 0.48876  |
| Nicaragua | 2009 | 0.545132 | 0.49153  |
| Nicaragua | 2010 | 0.550934 | 0.493435 |
| Nicaragua | 2011 | 0.535405 | 0.477532 |
| Nicaragua | 2012 | 0.522062 | 0.46299  |
| Nicaragua | 2013 | 0.524102 | 0.460842 |
| Nicaragua | 2014 | 0.537312 | 0.467204 |
| Nicaragua | 2015 | 0.557047 | 0.479269 |
| Nicaragua | 2016 | 0.541955 | 0.463483 |
| Nicaragua | 2017 | 0.558139 | 0.471183 |
| Nicaragua | 2018 | 0.560598 | 0.468403 |
| Nicaragua | 2019 | 0.562831 | 0.466458 |
| Niger     | 1990 | 0.810415 | 0.758079 |
| Niger     | 1991 | 0.826226 | 0.773965 |
| Niger     | 1992 | 0.838852 | 0.788117 |
| Niger     | 1993 | 0.845358 | 0.798159 |
| Niger     | 1994 | 0.855762 | 0.808671 |
| Niger     | 1995 | 0.860737 | 0.809156 |

1  
2  
3  
4  
5  
6  
7  
8  
9  
10  
11  
12  
13  
14  
15  
16  
17  
18  
19  
20  
21  
22  
23  
24  
25  
26  
27  
28  
29  
30  
31  
32  
33  
34  
35  
36  
37  
38  
39  
40  
41  
42  
43  
44  
45  
46

|         |      |          |          |
|---------|------|----------|----------|
| Niger   | 1996 | 0.856771 | 0.807281 |
| Niger   | 1997 | 0.855472 | 0.806414 |
| Niger   | 1998 | 0.843432 | 0.798485 |
| Niger   | 1999 | 0.828745 | 0.782915 |
| Niger   | 2000 | 0.819592 | 0.771369 |
| Niger   | 2001 | 0.806746 | 0.759651 |
| Niger   | 2002 | 0.797001 | 0.752312 |
| Niger   | 2003 | 0.787058 | 0.746425 |
| Niger   | 2004 | 0.775544 | 0.739366 |
| Niger   | 2005 | 0.766949 | 0.727909 |
| Niger   | 2006 | 0.756655 | 0.71908  |
| Niger   | 2007 | 0.750941 | 0.711134 |
| Niger   | 2008 | 0.743702 | 0.704064 |
| Niger   | 2009 | 0.735897 | 0.69378  |
| Niger   | 2010 | 0.727739 | 0.684338 |
| Niger   | 2011 | 0.726785 | 0.678833 |
| Niger   | 2012 | 0.724445 | 0.674636 |
| Niger   | 2013 | 0.718303 | 0.669687 |
| Niger   | 2014 | 0.722409 | 0.67305  |
| Niger   | 2015 | 0.724784 | 0.671592 |
| Niger   | 2016 | 0.724831 | 0.672213 |
| Niger   | 2017 | 0.726952 | 0.673326 |
| Niger   | 2018 | 0.721766 | 0.673434 |
| Niger   | 2019 | 0.724118 | 0.675679 |
| Nigeria | 1990 | 0.942702 | 0.872561 |

|         |      |          |          |
|---------|------|----------|----------|
| Nigeria | 1991 | 0.934436 | 0.872282 |
| Nigeria | 1992 | 0.924894 | 0.872943 |
| Nigeria | 1993 | 0.914077 | 0.870767 |
| Nigeria | 1994 | 0.906826 | 0.871447 |
| Nigeria | 1995 | 0.895881 | 0.866064 |
| Nigeria | 1996 | 0.885105 | 0.861683 |
| Nigeria | 1997 | 0.881762 | 0.864812 |
| Nigeria | 1998 | 0.87083  | 0.860374 |
| Nigeria | 1999 | 0.852298 | 0.847813 |
| Nigeria | 2000 | 0.834291 | 0.834275 |
| Nigeria | 2001 | 0.819429 | 0.824864 |
| Nigeria | 2002 | 0.807634 | 0.81888  |
| Nigeria | 2003 | 0.793461 | 0.811085 |
| Nigeria | 2004 | 0.783844 | 0.806558 |
| Nigeria | 2005 | 0.771572 | 0.797225 |
| Nigeria | 2006 | 0.765569 | 0.792637 |
| Nigeria | 2007 | 0.759324 | 0.78688  |
| Nigeria | 2008 | 0.75287  | 0.779753 |
| Nigeria | 2009 | 0.745507 | 0.769981 |
| Nigeria | 2010 | 0.736712 | 0.759652 |
| Nigeria | 2011 | 0.734046 | 0.753786 |
| Nigeria | 2012 | 0.737838 | 0.751281 |
| Nigeria | 2013 | 0.734996 | 0.740608 |
| Nigeria | 2014 | 0.742661 | 0.740121 |
| Nigeria | 2015 | 0.754025 | 0.743835 |

1  
2  
3  
4  
5  
6  
7  
8  
9  
10  
11  
12  
13  
14  
15  
16  
17  
18  
19  
20  
21  
22  
23  
24  
25  
26  
27  
28  
29  
30  
31  
32  
33  
34  
35  
36  
37  
38  
39  
40  
41  
42  
43  
44  
45  
46

|         |      |          |          |
|---------|------|----------|----------|
| Nigeria | 2016 | 0.763335 | 0.745167 |
| Nigeria | 2017 | 0.778616 | 0.75156  |
| Nigeria | 2018 | 0.793522 | 0.757511 |
| Nigeria | 2019 | 0.810217 | 0.764132 |
| Niue    | 1990 | 1.190231 | 0.775411 |
| Niue    | 1991 | 1.194033 | 0.789915 |
| Niue    | 1992 | 1.207319 | 0.812242 |
| Niue    | 1993 | 1.20373  | 0.823011 |
| Niue    | 1994 | 1.178585 | 0.817084 |
| Niue    | 1995 | 1.157887 | 0.813367 |
| Niue    | 1996 | 1.143385 | 0.814647 |
| Niue    | 1997 | 1.133241 | 0.820008 |
| Niue    | 1998 | 1.099876 | 0.807742 |
| Niue    | 1999 | 1.073953 | 0.798718 |
| Niue    | 2000 | 1.048715 | 0.788429 |
| Niue    | 2001 | 1.012068 | 0.767538 |
| Niue    | 2002 | 1.005777 | 0.76615  |
| Niue    | 2003 | 0.992871 | 0.757578 |
| Niue    | 2004 | 1.011142 | 0.772571 |
| Niue    | 2005 | 0.978883 | 0.747352 |
| Niue    | 2006 | 0.972596 | 0.743419 |
| Niue    | 2007 | 0.95894  | 0.733977 |
| Niue    | 2008 | 0.95539  | 0.73326  |
| Niue    | 2009 | 0.939876 | 0.721684 |
| Niue    | 2010 | 0.926776 | 0.71016  |

|                 |      |          |          |
|-----------------|------|----------|----------|
| Niue            | 2011 | 0.91639  | 0.701185 |
| Niue            | 2012 | 0.907389 | 0.69404  |
| Niue            | 2013 | 0.901788 | 0.689627 |
| Niue            | 2014 | 0.895694 | 0.683761 |
| Niue            | 2015 | 0.894766 | 0.680007 |
| Niue            | 2016 | 0.892505 | 0.676161 |
| Niue            | 2017 | 0.893889 | 0.676244 |
| Niue            | 2018 | 0.890768 | 0.674944 |
| Niue            | 2019 | 0.887772 | 0.673264 |
| North Macedonia | 1990 | 0.680204 | 0.58975  |
| North Macedonia | 1991 | 0.68378  | 0.5956   |
| North Macedonia | 1992 | 0.664624 | 0.571964 |
| North Macedonia | 1993 | 0.644703 | 0.547151 |
| North Macedonia | 1994 | 0.663149 | 0.555907 |
| North Macedonia | 1995 | 0.671096 | 0.552266 |
| North Macedonia | 1996 | 0.695813 | 0.563928 |
| North Macedonia | 1997 | 0.741597 | 0.594207 |
| North Macedonia | 1998 | 0.771646 | 0.617339 |
| North Macedonia | 1999 | 0.777685 | 0.616422 |
| North Macedonia | 2000 | 0.797954 | 0.622484 |
| North Macedonia | 2001 | 0.778443 | 0.606375 |
| North Macedonia | 2002 | 0.749492 | 0.587121 |
| North Macedonia | 2003 | 0.769429 | 0.60026  |
| North Macedonia | 2004 | 0.792515 | 0.614197 |
| North Macedonia | 2005 | 0.783544 | 0.610202 |

1  
2  
3  
4  
5  
6  
7  
8  
9  
10  
11  
12  
13  
14  
15  
16  
17  
18  
19  
20  
21  
22  
23  
24  
25  
26  
27  
28  
29  
30  
31  
32  
33  
34  
35  
36  
37  
38  
39  
40  
41  
42  
43  
44  
45  
46

|                          |      |          |          |
|--------------------------|------|----------|----------|
| North Macedonia          | 2006 | 0.767706 | 0.60037  |
| North Macedonia          | 2007 | 0.791232 | 0.612007 |
| North Macedonia          | 2008 | 0.790856 | 0.612737 |
| North Macedonia          | 2009 | 0.763725 | 0.598462 |
| North Macedonia          | 2010 | 0.778915 | 0.614822 |
| North Macedonia          | 2011 | 0.793147 | 0.637721 |
| North Macedonia          | 2012 | 0.811289 | 0.66772  |
| North Macedonia          | 2013 | 0.780544 | 0.642134 |
| North Macedonia          | 2014 | 0.776893 | 0.636497 |
| North Macedonia          | 2015 | 0.799244 | 0.654666 |
| North Macedonia          | 2016 | 0.786323 | 0.643621 |
| North Macedonia          | 2017 | 0.788026 | 0.643868 |
| North Macedonia          | 2018 | 0.795756 | 0.652467 |
| North Macedonia          | 2019 | 0.797522 | 0.654678 |
| Northern Mariana Islands | 1990 | 0.904061 | 1.155126 |
| Northern Mariana Islands | 1991 | 0.908144 | 1.156065 |
| Northern Mariana Islands | 1992 | 0.940581 | 1.169589 |
| Northern Mariana Islands | 1993 | 0.975433 | 1.173898 |
| Northern Mariana Islands | 1994 | 1.002007 | 1.17191  |
| Northern Mariana Islands | 1995 | 1.003151 | 1.154852 |
| Northern Mariana Islands | 1996 | 0.987202 | 1.126734 |
| Northern Mariana Islands | 1997 | 0.968009 | 1.097328 |
| Northern Mariana Islands | 1998 | 0.947527 | 1.065921 |
| Northern Mariana Islands | 1999 | 0.959593 | 1.066621 |
| Northern Mariana Islands | 2000 | 0.952837 | 1.060532 |

|                          |      |          |          |
|--------------------------|------|----------|----------|
| Northern Mariana Islands | 2001 | 0.991994 | 1.099375 |
| Northern Mariana Islands | 2002 | 0.987834 | 1.094556 |
| Northern Mariana Islands | 2003 | 0.979144 | 1.077003 |
| Northern Mariana Islands | 2004 | 0.978766 | 1.061672 |
| Northern Mariana Islands | 2005 | 0.955494 | 1.027025 |
| Northern Mariana Islands | 2006 | 0.935982 | 1.000809 |
| Northern Mariana Islands | 2007 | 0.897664 | 0.960032 |
| Northern Mariana Islands | 2008 | 0.864887 | 0.927883 |
| Northern Mariana Islands | 2009 | 0.838403 | 0.903614 |
| Northern Mariana Islands | 2010 | 0.815518 | 0.876638 |
| Northern Mariana Islands | 2011 | 0.817938 | 0.865424 |
| Northern Mariana Islands | 2012 | 0.827228 | 0.851935 |
| Northern Mariana Islands | 2013 | 0.852758 | 0.850358 |
| Northern Mariana Islands | 2014 | 0.875267 | 0.849207 |
| Northern Mariana Islands | 2015 | 0.888178 | 0.851222 |
| Northern Mariana Islands | 2016 | 0.885488 | 0.844042 |
| Northern Mariana Islands | 2017 | 0.888524 | 0.842979 |
| Northern Mariana Islands | 2018 | 0.887991 | 0.841535 |
| Northern Mariana Islands | 2019 | 0.885281 | 0.840043 |
| Norway                   | 1990 | 0.75453  | 0.444114 |
| Norway                   | 1991 | 0.76261  | 0.443497 |
| Norway                   | 1992 | 0.753197 | 0.43253  |
| Norway                   | 1993 | 0.762236 | 0.431351 |
| Norway                   | 1994 | 0.781039 | 0.438624 |
| Norway                   | 1995 | 0.763202 | 0.424597 |



1  
2  
3  
4  
5  
6  
7  
8  
9  
10  
11  
12  
13  
14  
15  
16  
17  
18  
19  
20  
21  
22  
23  
24  
25  
26  
27  
28  
29  
30  
31  
32  
33  
34  
35  
36  
37  
38  
39  
40  
41  
42  
43  
44  
45  
46

|        |      |          |          |
|--------|------|----------|----------|
| Norway | 1996 | 0.758874 | 0.419658 |
| Norway | 1997 | 0.75473  | 0.412952 |
| Norway | 1998 | 0.774382 | 0.420472 |
| Norway | 1999 | 0.804349 | 0.433843 |
| Norway | 2000 | 0.825601 | 0.441517 |
| Norway | 2001 | 0.853106 | 0.453431 |
| Norway | 2002 | 0.867374 | 0.459636 |
| Norway | 2003 | 0.880328 | 0.464835 |
| Norway | 2004 | 0.889531 | 0.470566 |
| Norway | 2005 | 0.89659  | 0.476656 |
| Norway | 2006 | 0.922606 | 0.490047 |
| Norway | 2007 | 0.907665 | 0.483353 |
| Norway | 2008 | 0.911053 | 0.485221 |
| Norway | 2009 | 0.928439 | 0.497259 |
| Norway | 2010 | 0.935386 | 0.504449 |
| Norway | 2011 | 0.92996  | 0.505624 |
| Norway | 2012 | 0.945872 | 0.517948 |
| Norway | 2013 | 0.94377  | 0.523526 |
| Norway | 2014 | 0.921463 | 0.517737 |
| Norway | 2015 | 0.916327 | 0.521282 |
| Norway | 2016 | 0.921739 | 0.532769 |
| Norway | 2017 | 0.936924 | 0.549344 |
| Norway | 2018 | 0.918215 | 0.550188 |
| Norway | 2019 | 0.878137 | 0.537045 |
| Oman   | 1990 | 0.979395 | 0.855588 |

|      |      |          |          |
|------|------|----------|----------|
| Oman | 1991 | 0.973416 | 0.875397 |
| Oman | 1992 | 0.949128 | 0.87044  |
| Oman | 1993 | 0.928445 | 0.864161 |
| Oman | 1994 | 0.918156 | 0.861888 |
| Oman | 1995 | 0.904759 | 0.858133 |
| Oman | 1996 | 0.87801  | 0.851048 |
| Oman | 1997 | 0.854061 | 0.839597 |
| Oman | 1998 | 0.840761 | 0.832031 |
| Oman | 1999 | 0.837351 | 0.831819 |
| Oman | 2000 | 0.834719 | 0.835971 |
| Oman | 2001 | 0.827618 | 0.842637 |
| Oman | 2002 | 0.836788 | 0.865047 |
| Oman | 2003 | 0.845547 | 0.873422 |
| Oman | 2004 | 0.855899 | 0.869597 |
| Oman | 2005 | 0.876488 | 0.894328 |
| Oman | 2006 | 0.881398 | 0.931667 |
| Oman | 2007 | 0.83088  | 0.881098 |
| Oman | 2008 | 0.794738 | 0.829971 |
| Oman | 2009 | 0.813201 | 0.848894 |
| Oman | 2010 | 0.846076 | 0.885023 |
| Oman | 2011 | 0.828041 | 0.880499 |
| Oman | 2012 | 0.795644 | 0.823064 |
| Oman | 2013 | 0.786745 | 0.844324 |
| Oman | 2014 | 0.832188 | 0.90246  |
| Oman | 2015 | 0.831518 | 0.871769 |

1  
2  
3  
4  
5  
6  
7  
8  
9  
10  
11  
12  
13  
14  
15  
16  
17  
18  
19  
20  
21  
22  
23  
24  
25  
26  
27  
28  
29  
30  
31  
32  
33  
34  
35  
36  
37  
38  
39  
40  
41  
42  
43  
44  
45  
46

|          |      |          |          |
|----------|------|----------|----------|
| Oman     | 2016 | 0.822027 | 0.839947 |
| Oman     | 2017 | 0.850428 | 0.847046 |
| Oman     | 2018 | 0.903009 | 0.894798 |
| Oman     | 2019 | 0.928841 | 0.907248 |
| Pakistan | 1990 | 0.769579 | 0.859356 |
| Pakistan | 1991 | 0.77647  | 0.861193 |
| Pakistan | 1992 | 0.790828 | 0.870807 |
| Pakistan | 1993 | 0.795747 | 0.870075 |
| Pakistan | 1994 | 0.805727 | 0.87484  |
| Pakistan | 1995 | 0.818759 | 0.883548 |
| Pakistan | 1996 | 0.825433 | 0.884969 |
| Pakistan | 1997 | 0.83398  | 0.887684 |
| Pakistan | 1998 | 0.842863 | 0.891115 |
| Pakistan | 1999 | 0.855256 | 0.899086 |
| Pakistan | 2000 | 0.86957  | 0.91118  |
| Pakistan | 2001 | 0.872852 | 0.911187 |
| Pakistan | 2002 | 0.871058 | 0.904883 |
| Pakistan | 2003 | 0.880193 | 0.910245 |
| Pakistan | 2004 | 0.877101 | 0.904079 |
| Pakistan | 2005 | 0.872892 | 0.897924 |
| Pakistan | 2006 | 0.872655 | 0.894325 |
| Pakistan | 2007 | 0.872149 | 0.891288 |
| Pakistan | 2008 | 0.875317 | 0.890402 |
| Pakistan | 2009 | 0.878341 | 0.890376 |
| Pakistan | 2010 | 0.878473 | 0.888904 |

|    |          |      |          |          |
|----|----------|------|----------|----------|
| 1  |          |      |          |          |
| 2  |          |      |          |          |
| 3  |          |      |          |          |
| 4  |          |      |          |          |
| 5  | Pakistan | 2011 | 0.877758 | 0.884423 |
| 6  | Pakistan | 2012 | 0.873696 | 0.878442 |
| 7  | Pakistan | 2013 | 0.883067 | 0.885333 |
| 8  | Pakistan | 2014 | 0.882844 | 0.883889 |
| 9  | Pakistan | 2015 | 0.881913 | 0.881605 |
| 10 | Pakistan | 2016 | 0.881354 | 0.879779 |
| 11 | Pakistan | 2017 | 0.883992 | 0.881982 |
| 12 | Pakistan | 2018 | 0.88619  | 0.884133 |
| 13 | Pakistan | 2019 | 0.889084 | 0.887167 |
| 14 | Palau    | 1990 | 0.590726 | 0.567074 |
| 15 | Palau    | 1991 | 0.592484 | 0.570484 |
| 16 | Palau    | 1992 | 0.597138 | 0.577494 |
| 17 | Palau    | 1993 | 0.598439 | 0.583652 |
| 18 | Palau    | 1994 | 0.607683 | 0.594125 |
| 19 | Palau    | 1995 | 0.602122 | 0.598155 |
| 20 | Palau    | 1996 | 0.594922 | 0.602471 |
| 21 | Palau    | 1997 | 0.583794 | 0.605164 |
| 22 | Palau    | 1998 | 0.569959 | 0.607432 |
| 23 | Palau    | 1999 | 0.552715 | 0.606219 |
| 24 | Palau    | 2000 | 0.535765 | 0.600872 |
| 25 | Palau    | 2001 | 0.527349 | 0.594391 |
| 26 | Palau    | 2002 | 0.528002 | 0.591384 |
| 27 | Palau    | 2003 | 0.527773 | 0.584654 |
| 28 | Palau    | 2004 | 0.551456 | 0.599923 |
| 29 | Palau    | 2005 | 0.561114 | 0.60323  |
| 30 |          |      |          |          |
| 31 |          |      |          |          |
| 32 |          |      |          |          |
| 33 |          |      |          |          |
| 34 |          |      |          |          |
| 35 |          |      |          |          |
| 36 |          |      |          |          |
| 37 |          |      |          |          |
| 38 |          |      |          |          |
| 39 |          |      |          |          |
| 40 |          |      |          |          |
| 41 |          |      |          |          |
| 42 |          |      |          |          |
| 43 |          |      |          |          |
| 44 |          |      |          |          |
| 45 |          |      |          |          |
| 46 |          |      |          |          |

|    |           |      |          |          |
|----|-----------|------|----------|----------|
| 1  |           |      |          |          |
| 2  |           |      |          |          |
| 3  |           |      |          |          |
| 4  |           |      |          |          |
| 5  | Palau     | 2006 | 0.560422 | 0.591128 |
| 6  | Palau     | 2007 | 0.553735 | 0.574366 |
| 7  | Palau     | 2008 | 0.548002 | 0.561176 |
| 8  | Palau     | 2009 | 0.544165 | 0.552275 |
| 9  | Palau     | 2010 | 0.540527 | 0.545934 |
| 10 | Palau     | 2011 | 0.537092 | 0.540225 |
| 11 | Palau     | 2012 | 0.533922 | 0.535625 |
| 12 | Palau     | 2013 | 0.533608 | 0.534197 |
| 13 | Palau     | 2014 | 0.531007 | 0.530978 |
| 14 | Palau     | 2015 | 0.529723 | 0.529574 |
| 15 | Palau     | 2016 | 0.529932 | 0.529197 |
| 16 | Palau     | 2017 | 0.533105 | 0.531537 |
| 17 | Palau     | 2018 | 0.535611 | 0.532533 |
| 18 | Palau     | 2019 | 0.538439 | 0.532765 |
| 19 | Palestine | 1990 | 1.096766 | 0.844508 |
| 20 | Palestine | 1991 | 1.091591 | 0.837304 |
| 21 | Palestine | 1992 | 1.084402 | 0.829288 |
| 22 | Palestine | 1993 | 1.079099 | 0.822787 |
| 23 | Palestine | 1994 | 1.078678 | 0.820767 |
| 24 | Palestine | 1995 | 1.07913  | 0.819914 |
| 25 | Palestine | 1996 | 1.078497 | 0.818714 |
| 26 | Palestine | 1997 | 1.046346 | 0.793599 |
| 27 | Palestine | 1998 | 1.00854  | 0.764127 |
| 28 | Palestine | 1999 | 0.968609 | 0.734114 |
| 29 | Palestine | 2000 | 0.941176 | 0.712675 |
| 30 |           |      |          |          |
| 31 |           |      |          |          |
| 32 |           |      |          |          |
| 33 |           |      |          |          |
| 34 |           |      |          |          |
| 35 |           |      |          |          |
| 36 |           |      |          |          |
| 37 |           |      |          |          |
| 38 |           |      |          |          |
| 39 |           |      |          |          |
| 40 |           |      |          |          |
| 41 |           |      |          |          |
| 42 |           |      |          |          |
| 43 |           |      |          |          |
| 44 |           |      |          |          |
| 45 |           |      |          |          |
| 46 |           |      |          |          |

|    |           |      |          |          |
|----|-----------|------|----------|----------|
| 1  |           |      |          |          |
| 2  |           |      |          |          |
| 3  |           |      |          |          |
| 4  |           |      |          |          |
| 5  | Palestine | 2001 | 0.911024 | 0.687406 |
| 6  | Palestine | 2002 | 0.883868 | 0.663667 |
| 7  | Palestine | 2003 | 0.868165 | 0.64945  |
| 8  | Palestine | 2004 | 0.866073 | 0.644743 |
| 9  | Palestine | 2005 | 0.862481 | 0.641533 |
| 10 | Palestine | 2006 | 0.86778  | 0.645021 |
| 11 | Palestine | 2007 | 0.888549 | 0.660241 |
| 12 | Palestine | 2008 | 0.918877 | 0.687188 |
| 13 | Palestine | 2009 | 0.938756 | 0.70351  |
| 14 | Palestine | 2010 | 0.97194  | 0.724081 |
| 15 | Palestine | 2011 | 0.972628 | 0.724938 |
| 16 | Palestine | 2012 | 0.957763 | 0.721228 |
| 17 | Palestine | 2013 | 0.962405 | 0.732859 |
| 18 | Palestine | 2014 | 0.945347 | 0.721619 |
| 19 | Palestine | 2015 | 0.981757 | 0.74991  |
| 20 | Palestine | 2016 | 1.030033 | 0.788183 |
| 21 | Palestine | 2017 | 1.031354 | 0.790637 |
| 22 | Palestine | 2018 | 1.009338 | 0.781943 |
| 23 | Palestine | 2019 | 1.007945 | 0.795501 |
| 24 | Panama    | 1990 | 0.684806 | 0.673883 |
| 25 | Panama    | 1991 | 0.662354 | 0.648572 |
| 26 | Panama    | 1992 | 0.682867 | 0.663984 |
| 27 | Panama    | 1993 | 0.622521 | 0.60272  |
| 28 | Panama    | 1994 | 0.632837 | 0.60781  |
| 29 | Panama    | 1995 | 0.609146 | 0.578484 |
| 30 |           |      |          |          |
| 31 |           |      |          |          |
| 32 |           |      |          |          |
| 33 |           |      |          |          |
| 34 |           |      |          |          |
| 35 |           |      |          |          |
| 36 |           |      |          |          |
| 37 |           |      |          |          |
| 38 |           |      |          |          |
| 39 |           |      |          |          |
| 40 |           |      |          |          |
| 41 |           |      |          |          |
| 42 |           |      |          |          |
| 43 |           |      |          |          |
| 44 |           |      |          |          |
| 45 |           |      |          |          |
| 46 |           |      |          |          |

|                  |      |          |          |
|------------------|------|----------|----------|
| Panama           | 1996 | 0.649564 | 0.611483 |
| Panama           | 1997 | 0.695155 | 0.650684 |
| Panama           | 1998 | 0.755965 | 0.707313 |
| Panama           | 1999 | 0.726618 | 0.67976  |
| Panama           | 2000 | 0.755907 | 0.704044 |
| Panama           | 2001 | 0.753036 | 0.698864 |
| Panama           | 2002 | 0.744099 | 0.687659 |
| Panama           | 2003 | 0.745748 | 0.685298 |
| Panama           | 2004 | 0.776886 | 0.713745 |
| Panama           | 2005 | 0.74812  | 0.688865 |
| Panama           | 2006 | 0.721141 | 0.662738 |
| Panama           | 2007 | 0.704199 | 0.645755 |
| Panama           | 2008 | 0.673904 | 0.615725 |
| Panama           | 2009 | 0.672603 | 0.61248  |
| Panama           | 2010 | 0.660371 | 0.597237 |
| Panama           | 2011 | 0.680747 | 0.613704 |
| Panama           | 2012 | 0.671265 | 0.603026 |
| Panama           | 2013 | 0.709723 | 0.637278 |
| Panama           | 2014 | 0.703626 | 0.631    |
| Panama           | 2015 | 0.696567 | 0.623082 |
| Panama           | 2016 | 0.695587 | 0.620452 |
| Panama           | 2017 | 0.686796 | 0.611485 |
| Panama           | 2018 | 0.70711  | 0.629843 |
| Panama           | 2019 | 0.702706 | 0.625932 |
| Papua New Guinea | 1990 | 0.510353 | 0.520489 |

|                  |      |          |          |
|------------------|------|----------|----------|
| Papua New Guinea | 1991 | 0.507586 | 0.517922 |
| Papua New Guinea | 1992 | 0.507342 | 0.516734 |
| Papua New Guinea | 1993 | 0.505816 | 0.514488 |
| Papua New Guinea | 1994 | 0.504687 | 0.513087 |
| Papua New Guinea | 1995 | 0.503742 | 0.512226 |
| Papua New Guinea | 1996 | 0.507201 | 0.51616  |
| Papua New Guinea | 1997 | 0.510876 | 0.518938 |
| Papua New Guinea | 1998 | 0.51547  | 0.522528 |
| Papua New Guinea | 1999 | 0.518813 | 0.525667 |
| Papua New Guinea | 2000 | 0.520481 | 0.527957 |
| Papua New Guinea | 2001 | 0.520252 | 0.52839  |
| Papua New Guinea | 2002 | 0.521909 | 0.529584 |
| Papua New Guinea | 2003 | 0.522595 | 0.530408 |
| Papua New Guinea | 2004 | 0.523892 | 0.532711 |
| Papua New Guinea | 2005 | 0.520392 | 0.530805 |
| Papua New Guinea | 2006 | 0.522667 | 0.534894 |
| Papua New Guinea | 2007 | 0.521963 | 0.535709 |
| Papua New Guinea | 2008 | 0.515748 | 0.531163 |
| Papua New Guinea | 2009 | 0.51058  | 0.528153 |
| Papua New Guinea | 2010 | 0.50998  | 0.528219 |
| Papua New Guinea | 2011 | 0.504127 | 0.522987 |
| Papua New Guinea | 2012 | 0.499902 | 0.520138 |
| Papua New Guinea | 2013 | 0.494541 | 0.517163 |
| Papua New Guinea | 2014 | 0.490763 | 0.51518  |
| Papua New Guinea | 2015 | 0.490012 | 0.516154 |



|                  |      |          |          |
|------------------|------|----------|----------|
| Papua New Guinea | 2016 | 0.488799 | 0.517054 |
| Papua New Guinea | 2017 | 0.489673 | 0.518489 |
| Papua New Guinea | 2018 | 0.488274 | 0.517236 |
| Papua New Guinea | 2019 | 0.487062 | 0.516906 |
| Paraguay         | 1990 | 0.87285  | 0.733251 |
| Paraguay         | 1991 | 0.871421 | 0.73538  |
| Paraguay         | 1992 | 0.861984 | 0.731253 |
| Paraguay         | 1993 | 0.893227 | 0.763558 |
| Paraguay         | 1994 | 0.874891 | 0.750756 |
| Paraguay         | 1995 | 0.891905 | 0.767908 |
| Paraguay         | 1996 | 0.894482 | 0.771026 |
| Paraguay         | 1997 | 0.90991  | 0.786707 |
| Paraguay         | 1998 | 0.891224 | 0.772082 |
| Paraguay         | 1999 | 0.892023 | 0.776159 |
| Paraguay         | 2000 | 0.908794 | 0.790837 |
| Paraguay         | 2001 | 0.900237 | 0.782912 |
| Paraguay         | 2002 | 0.900709 | 0.784708 |
| Paraguay         | 2003 | 0.899833 | 0.784946 |
| Paraguay         | 2004 | 0.905188 | 0.78769  |
| Paraguay         | 2005 | 0.906572 | 0.78923  |
| Paraguay         | 2006 | 0.919604 | 0.800699 |
| Paraguay         | 2007 | 0.895242 | 0.778963 |
| Paraguay         | 2008 | 0.8998   | 0.782922 |
| Paraguay         | 2009 | 0.887053 | 0.770607 |
| Paraguay         | 2010 | 0.889014 | 0.769331 |

|          |      |          |          |
|----------|------|----------|----------|
| Paraguay | 2011 | 0.893574 | 0.772361 |
| Paraguay | 2012 | 0.880004 | 0.758167 |
| Paraguay | 2013 | 0.894597 | 0.76836  |
| Paraguay | 2014 | 0.863302 | 0.743413 |
| Paraguay | 2015 | 0.829355 | 0.715781 |
| Paraguay | 2016 | 0.841111 | 0.72518  |
| Paraguay | 2017 | 0.843696 | 0.726201 |
| Paraguay | 2018 | 0.843366 | 0.725494 |
| Paraguay | 2019 | 0.836684 | 0.71842  |
| Peru     | 1990 | 0.913601 | 0.863955 |
| Peru     | 1991 | 1.00472  | 0.948777 |
| Peru     | 1992 | 1.044879 | 0.98688  |
| Peru     | 1993 | 1.027759 | 0.970272 |
| Peru     | 1994 | 1.115356 | 1.054376 |
| Peru     | 1995 | 1.156215 | 1.097468 |
| Peru     | 1996 | 1.083906 | 1.03572  |
| Peru     | 1997 | 1.079265 | 1.033944 |
| Peru     | 1998 | 1.084938 | 1.038903 |
| Peru     | 1999 | 1.053269 | 1.008394 |
| Peru     | 2000 | 1.05003  | 1.00284  |
| Peru     | 2001 | 1.015949 | 0.966888 |
| Peru     | 2002 | 1.021084 | 0.968834 |
| Peru     | 2003 | 1.050852 | 0.995309 |
| Peru     | 2004 | 1.010514 | 0.953906 |
| Peru     | 2005 | 1.011217 | 0.949196 |

|             |      |          |          |
|-------------|------|----------|----------|
| Peru        | 2006 | 0.971567 | 0.907069 |
| Peru        | 2007 | 0.93459  | 0.868534 |
| Peru        | 2008 | 0.964408 | 0.891577 |
| Peru        | 2009 | 1.005513 | 0.925821 |
| Peru        | 2010 | 1.016288 | 0.931538 |
| Peru        | 2011 | 1.030177 | 0.940505 |
| Peru        | 2012 | 1.051711 | 0.956412 |
| Peru        | 2013 | 1.058485 | 0.95881  |
| Peru        | 2014 | 1.067343 | 0.963477 |
| Peru        | 2015 | 1.06634  | 0.959772 |
| Peru        | 2016 | 1.074129 | 0.96437  |
| Peru        | 2017 | 1.089316 | 0.975806 |
| Peru        | 2018 | 1.098656 | 0.982166 |
| Peru        | 2019 | 1.110745 | 0.990734 |
| Philippines | 1990 | 0.895381 | 0.902283 |
| Philippines | 1991 | 0.880509 | 0.883263 |
| Philippines | 1992 | 0.881702 | 0.876569 |
| Philippines | 1993 | 0.877133 | 0.864402 |
| Philippines | 1994 | 0.86956  | 0.85266  |
| Philippines | 1995 | 0.87258  | 0.852439 |
| Philippines | 1996 | 0.866278 | 0.838327 |
| Philippines | 1997 | 0.8542   | 0.812544 |
| Philippines | 1998 | 0.847416 | 0.798709 |
| Philippines | 1999 | 0.848855 | 0.801611 |
| Philippines | 2000 | 0.854486 | 0.804787 |

|             |      |          |          |
|-------------|------|----------|----------|
| Philippines | 2001 | 0.854201 | 0.80103  |
| Philippines | 2002 | 0.85769  | 0.80353  |
| Philippines | 2003 | 0.847201 | 0.792661 |
| Philippines | 2004 | 0.843162 | 0.788747 |
| Philippines | 2005 | 0.841734 | 0.787366 |
| Philippines | 2006 | 0.834808 | 0.780353 |
| Philippines | 2007 | 0.832589 | 0.775666 |
| Philippines | 2008 | 0.838592 | 0.777601 |
| Philippines | 2009 | 0.835108 | 0.770345 |
| Philippines | 2010 | 0.829964 | 0.764372 |
| Philippines | 2011 | 0.827424 | 0.758476 |
| Philippines | 2012 | 0.838945 | 0.763847 |
| Philippines | 2013 | 0.85046  | 0.770959 |
| Philippines | 2014 | 0.840941 | 0.760785 |
| Philippines | 2015 | 0.845221 | 0.761678 |
| Philippines | 2016 | 0.843903 | 0.758905 |
| Philippines | 2017 | 0.852911 | 0.768268 |
| Philippines | 2018 | 0.858187 | 0.773633 |
| Philippines | 2019 | 0.859915 | 0.775107 |
| Poland      | 1990 | 0.917881 | 0.594086 |
| Poland      | 1991 | 0.90409  | 0.580834 |
| Poland      | 1992 | 0.919908 | 0.58486  |
| Poland      | 1993 | 0.946987 | 0.594748 |
| Poland      | 1994 | 0.960281 | 0.600366 |
| Poland      | 1995 | 0.958064 | 0.595011 |

|    |          |      |          |          |
|----|----------|------|----------|----------|
| 1  |          |      |          |          |
| 2  |          |      |          |          |
| 3  |          |      |          |          |
| 4  |          |      |          |          |
| 5  | Poland   | 1996 | 0.985587 | 0.604305 |
| 6  | Poland   | 1997 | 0.999282 | 0.608044 |
| 7  | Poland   | 1998 | 1.016292 | 0.611599 |
| 8  | Poland   | 1999 | 1.025894 | 0.611673 |
| 9  | Poland   | 2000 | 1.053107 | 0.615915 |
| 10 | Poland   | 2001 | 1.045756 | 0.604648 |
| 11 | Poland   | 2002 | 1.042927 | 0.59748  |
| 12 | Poland   | 2003 | 1.038911 | 0.591794 |
| 13 | Poland   | 2004 | 1.041969 | 0.592438 |
| 14 | Poland   | 2005 | 1.070954 | 0.608519 |
| 15 | Poland   | 2006 | 1.101807 | 0.627874 |
| 16 | Poland   | 2007 | 1.126684 | 0.643817 |
| 17 | Poland   | 2008 | 1.09441  | 0.626611 |
| 18 | Poland   | 2009 | 1.086273 | 0.622186 |
| 19 | Poland   | 2010 | 1.050341 | 0.600421 |
| 20 | Poland   | 2011 | 1.022768 | 0.5837   |
| 21 | Poland   | 2012 | 1.045657 | 0.594587 |
| 22 | Poland   | 2013 | 1.06034  | 0.600538 |
| 23 | Poland   | 2014 | 1.095376 | 0.617875 |
| 24 | Poland   | 2015 | 1.090725 | 0.612589 |
| 25 | Poland   | 2016 | 1.085856 | 0.609823 |
| 26 | Poland   | 2017 | 1.063426 | 0.59996  |
| 27 | Poland   | 2018 | 1.053713 | 0.59652  |
| 28 | Poland   | 2019 | 1.043147 | 0.59288  |
| 29 | Poland   | 2019 | 1.043147 | 0.59288  |
| 30 | Poland   | 2019 | 1.043147 | 0.59288  |
| 31 | Poland   | 2019 | 1.043147 | 0.59288  |
| 32 | Poland   | 2019 | 1.043147 | 0.59288  |
| 33 | Poland   | 2019 | 1.043147 | 0.59288  |
| 34 | Poland   | 2019 | 1.043147 | 0.59288  |
| 35 | Poland   | 2019 | 1.043147 | 0.59288  |
| 36 | Poland   | 2019 | 1.043147 | 0.59288  |
| 37 | Portugal | 1990 | 0.884262 | 0.543926 |
| 38 |          |      |          |          |
| 39 |          |      |          |          |
| 40 |          |      |          |          |
| 41 |          |      |          |          |
| 42 |          |      |          |          |
| 43 |          |      |          |          |
| 44 |          |      |          |          |
| 45 |          |      |          |          |
| 46 |          |      |          |          |

|          |      |          |          |
|----------|------|----------|----------|
| Portugal | 1991 | 0.890398 | 0.549614 |
| Portugal | 1992 | 0.887748 | 0.548645 |
| Portugal | 1993 | 0.905257 | 0.559067 |
| Portugal | 1994 | 0.934888 | 0.578709 |
| Portugal | 1995 | 0.954761 | 0.593079 |
| Portugal | 1996 | 0.955694 | 0.595236 |
| Portugal | 1997 | 0.983491 | 0.612126 |
| Portugal | 1998 | 0.9847   | 0.611874 |
| Portugal | 1999 | 0.994401 | 0.611865 |
| Portugal | 2000 | 1.014619 | 0.622443 |
| Portugal | 2001 | 1.023922 | 0.627747 |
| Portugal | 2002 | 1.046333 | 0.641815 |
| Portugal | 2003 | 1.071809 | 0.658259 |
| Portugal | 2004 | 1.082705 | 0.665587 |
| Portugal | 2005 | 1.100718 | 0.675084 |
| Portugal | 2006 | 1.117627 | 0.682107 |
| Portugal | 2007 | 1.12877  | 0.685484 |
| Portugal | 2008 | 1.135725 | 0.684655 |
| Portugal | 2009 | 1.158093 | 0.693652 |
| Portugal | 2010 | 1.181695 | 0.701173 |
| Portugal | 2011 | 1.212089 | 0.712886 |
| Portugal | 2012 | 1.214154 | 0.709169 |
| Portugal | 2013 | 1.223854 | 0.710161 |
| Portugal | 2014 | 1.23894  | 0.71278  |
| Portugal | 2015 | 1.253346 | 0.718468 |

|             |      |          |          |
|-------------|------|----------|----------|
| Portugal    | 2016 | 1.250497 | 0.714503 |
| Portugal    | 2017 | 1.242519 | 0.710662 |
| Portugal    | 2018 | 1.247566 | 0.715337 |
| Portugal    | 2019 | 1.242236 | 0.713636 |
| Puerto Rico | 1990 | 0.80275  | 0.669891 |
| Puerto Rico | 1991 | 0.809018 | 0.669491 |
| Puerto Rico | 1992 | 0.805713 | 0.661874 |
| Puerto Rico | 1993 | 0.80907  | 0.659305 |
| Puerto Rico | 1994 | 0.823879 | 0.665447 |
| Puerto Rico | 1995 | 0.795614 | 0.637683 |
| Puerto Rico | 1996 | 0.821616 | 0.653485 |
| Puerto Rico | 1997 | 0.806042 | 0.636572 |
| Puerto Rico | 1998 | 0.783507 | 0.61465  |
| Puerto Rico | 1999 | 0.830368 | 0.646628 |
| Puerto Rico | 2000 | 0.847044 | 0.655127 |
| Puerto Rico | 2001 | 0.813541 | 0.623902 |
| Puerto Rico | 2002 | 0.837027 | 0.636125 |
| Puerto Rico | 2003 | 0.849227 | 0.641471 |
| Puerto Rico | 2004 | 0.851207 | 0.638502 |
| Puerto Rico | 2005 | 0.819532 | 0.609731 |
| Puerto Rico | 2006 | 0.828059 | 0.610677 |
| Puerto Rico | 2007 | 0.851411 | 0.623053 |
| Puerto Rico | 2008 | 0.870717 | 0.634801 |
| Puerto Rico | 2009 | 0.835635 | 0.606872 |
| Puerto Rico | 2010 | 0.873679 | 0.632793 |

|             |      |          |          |
|-------------|------|----------|----------|
| Puerto Rico | 2011 | 0.865857 | 0.627258 |
| Puerto Rico | 2012 | 0.864947 | 0.620861 |
| Puerto Rico | 2013 | 0.87645  | 0.628923 |
| Puerto Rico | 2014 | 0.887603 | 0.635695 |
| Puerto Rico | 2015 | 0.868531 | 0.617416 |
| Puerto Rico | 2016 | 0.888741 | 0.631972 |
| Puerto Rico | 2017 | 0.888622 | 0.629582 |
| Puerto Rico | 2018 | 0.911225 | 0.642743 |
| Puerto Rico | 2019 | 0.924823 | 0.650285 |
| Qatar       | 1990 | 0.952955 | 1.265583 |
| Qatar       | 1991 | 0.901362 | 1.196006 |
| Qatar       | 1992 | 0.878474 | 1.194201 |
| Qatar       | 1993 | 0.898298 | 1.317721 |
| Qatar       | 1994 | 0.910554 | 1.544928 |
| Qatar       | 1995 | 0.875373 | 1.597969 |
| Qatar       | 1996 | 0.813587 | 1.370316 |
| Qatar       | 1997 | 0.763374 | 1.260175 |
| Qatar       | 1998 | 0.741687 | 1.250523 |
| Qatar       | 1999 | 0.752939 | 1.33758  |
| Qatar       | 2000 | 0.763105 | 1.470088 |
| Qatar       | 2001 | 0.776966 | 1.566502 |
| Qatar       | 2002 | 0.775655 | 1.635752 |
| Qatar       | 2003 | 0.76026  | 1.672719 |
| Qatar       | 2004 | 0.769387 | 1.81363  |
| Qatar       | 2005 | 0.780175 | 1.889947 |



1  
2  
3  
4  
5  
6  
7  
8  
9  
10  
11  
12  
13  
14  
15  
16  
17  
18  
19  
20  
21  
22  
23  
24  
25  
26  
27  
28  
29  
30  
31  
32  
33  
34  
35  
36  
37  
38  
39  
40  
41  
42  
43  
44  
45  
46

|                   |      |          |          |
|-------------------|------|----------|----------|
| Qatar             | 2006 | 0.75546  | 1.899169 |
| Qatar             | 2007 | 0.740074 | 1.926302 |
| Qatar             | 2008 | 0.708016 | 1.953539 |
| Qatar             | 2009 | 0.686412 | 2.077397 |
| Qatar             | 2010 | 0.675395 | 2.109451 |
| Qatar             | 2011 | 0.652704 | 2.009032 |
| Qatar             | 2012 | 0.635437 | 1.934902 |
| Qatar             | 2013 | 0.645644 | 1.98802  |
| Qatar             | 2014 | 0.649426 | 1.950938 |
| Qatar             | 2015 | 0.59925  | 1.734004 |
| Qatar             | 2016 | 0.609361 | 1.770803 |
| Qatar             | 2017 | 0.624812 | 1.811416 |
| Qatar             | 2018 | 0.631227 | 1.877501 |
| Qatar             | 2019 | 0.623123 | 1.904559 |
| Republic of Korea | 1990 | 0.857258 | 0.549206 |
| Republic of Korea | 1991 | 0.875952 | 0.551973 |
| Republic of Korea | 1992 | 0.905363 | 0.563273 |
| Republic of Korea | 1993 | 0.922645 | 0.569835 |
| Republic of Korea | 1994 | 0.927687 | 0.567936 |
| Republic of Korea | 1995 | 0.968644 | 0.600595 |
| Republic of Korea | 1996 | 0.983011 | 0.618658 |
| Republic of Korea | 1997 | 1.005261 | 0.628044 |
| Republic of Korea | 1998 | 1.022196 | 0.634332 |
| Republic of Korea | 1999 | 1.047436 | 0.6421   |
| Republic of Korea | 2000 | 1.072308 | 0.652147 |

|    |                     |      |          |          |
|----|---------------------|------|----------|----------|
| 1  |                     |      |          |          |
| 2  |                     |      |          |          |
| 3  |                     |      |          |          |
| 4  |                     |      |          |          |
| 5  | Republic of Korea   | 2001 | 1.084258 | 0.656648 |
| 6  | Republic of Korea   | 2002 | 1.098332 | 0.660852 |
| 7  | Republic of Korea   | 2003 | 1.097612 | 0.658917 |
| 8  | Republic of Korea   | 2004 | 1.07524  | 0.647505 |
| 9  | Republic of Korea   | 2005 | 1.071843 | 0.64214  |
| 10 | Republic of Korea   | 2006 | 1.053906 | 0.631558 |
| 11 | Republic of Korea   | 2007 | 1.044885 | 0.623151 |
| 12 | Republic of Korea   | 2008 | 1.029952 | 0.613718 |
| 13 | Republic of Korea   | 2009 | 1.024996 | 0.609758 |
| 14 | Republic of Korea   | 2010 | 1.018097 | 0.600666 |
| 15 | Republic of Korea   | 2011 | 1.014423 | 0.595254 |
| 16 | Republic of Korea   | 2012 | 1.014457 | 0.594651 |
| 17 | Republic of Korea   | 2013 | 1.016761 | 0.598625 |
| 18 | Republic of Korea   | 2014 | 1.009222 | 0.597557 |
| 19 | Republic of Korea   | 2015 | 1.013167 | 0.598706 |
| 20 | Republic of Korea   | 2016 | 1.015444 | 0.601958 |
| 21 | Republic of Korea   | 2017 | 1.00616  | 0.602647 |
| 22 | Republic of Korea   | 2018 | 1.025879 | 0.621714 |
| 23 | Republic of Korea   | 2019 | 1.022686 | 0.625971 |
| 24 | Republic of Moldova | 1990 | 0.848599 | 0.515396 |
| 25 | Republic of Moldova | 1991 | 0.818752 | 0.511245 |
| 26 | Republic of Moldova | 1992 | 0.812354 | 0.508411 |
| 27 | Republic of Moldova | 1993 | 0.824758 | 0.520016 |
| 28 | Republic of Moldova | 1994 | 0.758844 | 0.496269 |
| 29 | Republic of Moldova | 1995 | 0.723716 | 0.482553 |
| 30 |                     |      |          |          |
| 31 |                     |      |          |          |
| 32 |                     |      |          |          |
| 33 |                     |      |          |          |
| 34 |                     |      |          |          |
| 35 |                     |      |          |          |
| 36 |                     |      |          |          |
| 37 |                     |      |          |          |
| 38 |                     |      |          |          |
| 39 |                     |      |          |          |
| 40 |                     |      |          |          |
| 41 |                     |      |          |          |
| 42 |                     |      |          |          |
| 43 |                     |      |          |          |
| 44 |                     |      |          |          |
| 45 |                     |      |          |          |
| 46 |                     |      |          |          |

|    |                     |      |          |          |
|----|---------------------|------|----------|----------|
| 1  |                     |      |          |          |
| 2  |                     |      |          |          |
| 3  |                     |      |          |          |
| 4  |                     |      |          |          |
| 5  | Republic of Moldova | 1996 | 0.715793 | 0.47752  |
| 6  | Republic of Moldova | 1997 | 0.74865  | 0.492646 |
| 7  | Republic of Moldova | 1998 | 0.729586 | 0.478633 |
| 8  | Republic of Moldova | 1999 | 0.75475  | 0.494013 |
| 9  | Republic of Moldova | 2000 | 0.786413 | 0.514092 |
| 10 | Republic of Moldova | 2001 | 0.805144 | 0.526969 |
| 11 | Republic of Moldova | 2002 | 0.881436 | 0.580425 |
| 12 | Republic of Moldova | 2003 | 0.920664 | 0.606418 |
| 13 | Republic of Moldova | 2004 | 0.883634 | 0.573869 |
| 14 | Republic of Moldova | 2005 | 0.825192 | 0.541935 |
| 15 | Republic of Moldova | 2006 | 0.878413 | 0.571388 |
| 16 | Republic of Moldova | 2007 | 0.941002 | 0.612718 |
| 17 | Republic of Moldova | 2008 | 0.957584 | 0.626718 |
| 18 | Republic of Moldova | 2009 | 0.965352 | 0.637306 |
| 19 | Republic of Moldova | 2010 | 0.955516 | 0.637033 |
| 20 | Republic of Moldova | 2011 | 0.986443 | 0.647917 |
| 21 | Republic of Moldova | 2012 | 1.008266 | 0.659343 |
| 22 | Republic of Moldova | 2013 | 1.062256 | 0.694627 |
| 23 | Republic of Moldova | 2014 | 1.059157 | 0.69576  |
| 24 | Republic of Moldova | 2015 | 1.00229  | 0.644196 |
| 25 | Republic of Moldova | 2016 | 1.059686 | 0.666742 |
| 26 | Republic of Moldova | 2017 | 1.114566 | 0.69188  |
| 27 | Republic of Moldova | 2018 | 1.082026 | 0.672992 |
| 28 | Republic of Moldova | 2019 | 1.044547 | 0.651103 |
| 29 | Romania             | 1990 | 1.079553 | 0.866268 |
| 30 |                     |      |          |          |
| 31 |                     |      |          |          |
| 32 |                     |      |          |          |
| 33 |                     |      |          |          |
| 34 |                     |      |          |          |
| 35 |                     |      |          |          |
| 36 |                     |      |          |          |
| 37 |                     |      |          |          |
| 38 |                     |      |          |          |
| 39 |                     |      |          |          |
| 40 |                     |      |          |          |
| 41 |                     |      |          |          |
| 42 |                     |      |          |          |
| 43 |                     |      |          |          |
| 44 |                     |      |          |          |
| 45 |                     |      |          |          |
| 46 |                     |      |          |          |

|         |      |          |          |
|---------|------|----------|----------|
| Romania | 1991 | 1.086222 | 0.862351 |
| Romania | 1992 | 1.046153 | 0.826138 |
| Romania | 1993 | 1.029617 | 0.80953  |
| Romania | 1994 | 1.012606 | 0.792177 |
| Romania | 1995 | 1.000688 | 0.777709 |
| Romania | 1996 | 0.983609 | 0.758064 |
| Romania | 1997 | 0.959848 | 0.733464 |
| Romania | 1998 | 0.981335 | 0.736681 |
| Romania | 1999 | 0.997782 | 0.738726 |
| Romania | 2000 | 0.994107 | 0.73164  |
| Romania | 2001 | 0.956077 | 0.70287  |
| Romania | 2002 | 0.951443 | 0.694438 |
| Romania | 2003 | 0.945295 | 0.685769 |
| Romania | 2004 | 0.936806 | 0.672382 |
| Romania | 2005 | 0.962369 | 0.686111 |
| Romania | 2006 | 0.981261 | 0.695823 |
| Romania | 2007 | 1.005379 | 0.708652 |
| Romania | 2008 | 0.989066 | 0.694823 |
| Romania | 2009 | 0.998743 | 0.697203 |
| Romania | 2010 | 0.99074  | 0.686144 |
| Romania | 2011 | 1.001066 | 0.685511 |
| Romania | 2012 | 0.997056 | 0.677662 |
| Romania | 2013 | 1.01578  | 0.685032 |
| Romania | 2014 | 1.005041 | 0.674832 |
| Romania | 2015 | 1.007222 | 0.673017 |

|                    |      |          |          |
|--------------------|------|----------|----------|
| Romania            | 2016 | 1.00319  | 0.668504 |
| Romania            | 2017 | 1.008839 | 0.671674 |
| Romania            | 2018 | 1.002935 | 0.667179 |
| Romania            | 2019 | 1.007882 | 0.667713 |
| Russian Federation | 1990 | 1.237604 | 0.690445 |
| Russian Federation | 1991 | 1.240021 | 0.696266 |
| Russian Federation | 1992 | 1.175419 | 0.674369 |
| Russian Federation | 1993 | 1.095619 | 0.649003 |
| Russian Federation | 1994 | 1.066959 | 0.643526 |
| Russian Federation | 1995 | 1.088154 | 0.651418 |
| Russian Federation | 1996 | 1.13313  | 0.665031 |
| Russian Federation | 1997 | 1.192142 | 0.685413 |
| Russian Federation | 1998 | 1.203965 | 0.68899  |
| Russian Federation | 1999 | 1.163027 | 0.676473 |
| Russian Federation | 2000 | 1.12748  | 0.660553 |
| Russian Federation | 2001 | 1.143098 | 0.666437 |
| Russian Federation | 2002 | 1.151992 | 0.668583 |
| Russian Federation | 2003 | 1.154748 | 0.670397 |
| Russian Federation | 2004 | 1.162412 | 0.672801 |
| Russian Federation | 2005 | 1.157706 | 0.672401 |
| Russian Federation | 2006 | 1.19925  | 0.68176  |
| Russian Federation | 2007 | 1.232211 | 0.690174 |
| Russian Federation | 2008 | 1.223246 | 0.681691 |
| Russian Federation | 2009 | 1.255663 | 0.690114 |
| Russian Federation | 2010 | 1.250566 | 0.683559 |

|    |                    |      |          |          |
|----|--------------------|------|----------|----------|
| 1  |                    |      |          |          |
| 2  |                    |      |          |          |
| 3  |                    |      |          |          |
| 4  |                    |      |          |          |
| 5  | Russian Federation | 2011 | 1.286702 | 0.694845 |
| 6  | Russian Federation | 2012 | 1.295215 | 0.692835 |
| 7  | Russian Federation | 2013 | 1.305034 | 0.693218 |
| 8  | Russian Federation | 2014 | 1.302006 | 0.689733 |
| 9  | Russian Federation | 2015 | 1.334409 | 0.703311 |
| 10 | Russian Federation | 2016 | 1.344511 | 0.707135 |
| 11 | Russian Federation | 2017 | 1.394103 | 0.731382 |
| 12 | Russian Federation | 2018 | 1.394549 | 0.735282 |
| 13 | Russian Federation | 2019 | 1.381232 | 0.732034 |
| 14 | Russian Federation | 2019 | 1.381232 | 0.732034 |
| 15 | Russian Federation | 2019 | 1.381232 | 0.732034 |
| 16 | Russian Federation | 2019 | 1.381232 | 0.732034 |
| 17 | Rwanda             | 1990 | 0.824395 | 0.650032 |
| 18 | Rwanda             | 1991 | 0.81081  | 0.639775 |
| 19 | Rwanda             | 1992 | 0.782385 | 0.617991 |
| 20 | Rwanda             | 1993 | 0.760105 | 0.601291 |
| 21 | Rwanda             | 1994 | 0.756358 | 0.581929 |
| 22 | Rwanda             | 1995 | 0.759429 | 0.566516 |
| 23 | Rwanda             | 1996 | 0.759521 | 0.566825 |
| 24 | Rwanda             | 1997 | 0.765052 | 0.5693   |
| 25 | Rwanda             | 1998 | 0.787475 | 0.580555 |
| 26 | Rwanda             | 1999 | 0.816803 | 0.597427 |
| 27 | Rwanda             | 2000 | 0.829663 | 0.603649 |
| 28 | Rwanda             | 2001 | 0.843068 | 0.611413 |
| 29 | Rwanda             | 2002 | 0.852925 | 0.615855 |
| 30 | Rwanda             | 2003 | 0.865838 | 0.623707 |
| 31 | Rwanda             | 2004 | 0.873066 | 0.62669  |
| 32 | Rwanda             | 2005 | 0.876651 | 0.629256 |
| 33 |                    |      |          |          |
| 34 |                    |      |          |          |
| 35 |                    |      |          |          |
| 36 |                    |      |          |          |
| 37 |                    |      |          |          |
| 38 |                    |      |          |          |
| 39 |                    |      |          |          |
| 40 |                    |      |          |          |
| 41 |                    |      |          |          |
| 42 |                    |      |          |          |
| 43 |                    |      |          |          |
| 44 |                    |      |          |          |
| 45 |                    |      |          |          |
| 46 |                    |      |          |          |

|                       |      |          |          |
|-----------------------|------|----------|----------|
| Rwanda                | 2006 | 0.874617 | 0.628897 |
| Rwanda                | 2007 | 0.878535 | 0.630917 |
| Rwanda                | 2008 | 0.887536 | 0.635571 |
| Rwanda                | 2009 | 0.895936 | 0.641741 |
| Rwanda                | 2010 | 0.908779 | 0.649458 |
| Rwanda                | 2011 | 0.918745 | 0.656101 |
| Rwanda                | 2012 | 0.926945 | 0.661974 |
| Rwanda                | 2013 | 0.939974 | 0.672839 |
| Rwanda                | 2014 | 0.956287 | 0.683731 |
| Rwanda                | 2015 | 0.969773 | 0.693098 |
| Rwanda                | 2016 | 0.978654 | 0.701247 |
| Rwanda                | 2017 | 0.990168 | 0.711922 |
| Rwanda                | 2018 | 0.998336 | 0.721102 |
| Rwanda                | 2019 | 1.006308 | 0.729699 |
| Saint Kitts and Nevis | 1990 | 0.977618 | 0.720692 |
| Saint Kitts and Nevis | 1991 | 0.777526 | 0.583399 |
| Saint Kitts and Nevis | 1992 | 0.785881 | 0.582392 |
| Saint Kitts and Nevis | 1993 | 0.805116 | 0.592521 |
| Saint Kitts and Nevis | 1994 | 0.839028 | 0.608603 |
| Saint Kitts and Nevis | 1995 | 0.876303 | 0.63063  |
| Saint Kitts and Nevis | 1996 | 0.864655 | 0.621258 |
| Saint Kitts and Nevis | 1997 | 0.863032 | 0.618292 |
| Saint Kitts and Nevis | 1998 | 0.870163 | 0.623277 |
| Saint Kitts and Nevis | 1999 | 0.883872 | 0.634954 |
| Saint Kitts and Nevis | 2000 | 0.915314 | 0.659458 |

|    |                       |      |          |          |
|----|-----------------------|------|----------|----------|
| 1  |                       |      |          |          |
| 2  |                       |      |          |          |
| 3  |                       |      |          |          |
| 4  |                       |      |          |          |
| 5  | Saint Kitts and Nevis | 2001 | 0.928859 | 0.671865 |
| 6  | Saint Kitts and Nevis | 2002 | 0.937404 | 0.681404 |
| 7  | Saint Kitts and Nevis | 2003 | 0.933207 | 0.684634 |
| 8  | Saint Kitts and Nevis | 2004 | 0.939514 | 0.703626 |
| 9  | Saint Kitts and Nevis | 2005 | 0.924993 | 0.701387 |
| 10 | Saint Kitts and Nevis | 2006 | 0.919201 | 0.70406  |
| 11 | Saint Kitts and Nevis | 2007 | 0.915181 | 0.707981 |
| 12 | Saint Kitts and Nevis | 2008 | 0.952305 | 0.723867 |
| 13 | Saint Kitts and Nevis | 2009 | 0.968373 | 0.732117 |
| 14 | Saint Kitts and Nevis | 2010 | 0.954543 | 0.723024 |
| 15 | Saint Kitts and Nevis | 2011 | 0.948111 | 0.715818 |
| 16 | Saint Kitts and Nevis | 2012 | 0.924673 | 0.698322 |
| 17 | Saint Kitts and Nevis | 2013 | 0.918237 | 0.695838 |
| 18 | Saint Kitts and Nevis | 2014 | 0.906135 | 0.692654 |
| 19 | Saint Kitts and Nevis | 2015 | 0.881642 | 0.680331 |
| 20 | Saint Kitts and Nevis | 2016 | 0.867707 | 0.674668 |
| 21 | Saint Kitts and Nevis | 2017 | 0.850948 | 0.666632 |
| 22 | Saint Kitts and Nevis | 2018 | 0.831812 | 0.66427  |
| 23 | Saint Kitts and Nevis | 2019 | 0.750426 | 0.666059 |
| 24 | Saint Lucia           | 1990 | 0.820367 | 0.585517 |
| 25 | Saint Lucia           | 1991 | 0.834488 | 0.602001 |
| 26 | Saint Lucia           | 1992 | 0.850757 | 0.616906 |
| 27 | Saint Lucia           | 1993 | 0.849089 | 0.617068 |
| 28 | Saint Lucia           | 1994 | 0.839079 | 0.615244 |
| 29 | Saint Lucia           | 1995 | 0.835752 | 0.620428 |
| 30 |                       |      |          |          |
| 31 |                       |      |          |          |
| 32 |                       |      |          |          |
| 33 |                       |      |          |          |
| 34 |                       |      |          |          |
| 35 |                       |      |          |          |
| 36 |                       |      |          |          |
| 37 |                       |      |          |          |
| 38 |                       |      |          |          |
| 39 |                       |      |          |          |
| 40 |                       |      |          |          |
| 41 |                       |      |          |          |
| 42 |                       |      |          |          |
| 43 |                       |      |          |          |
| 44 |                       |      |          |          |
| 45 |                       |      |          |          |
| 46 |                       |      |          |          |



|    |                                  |      |          |          |
|----|----------------------------------|------|----------|----------|
| 1  |                                  |      |          |          |
| 2  |                                  |      |          |          |
| 3  |                                  |      |          |          |
| 4  |                                  |      |          |          |
| 5  | Saint Lucia                      | 1996 | 0.802615 | 0.604438 |
| 6  | Saint Lucia                      | 1997 | 0.774274 | 0.589376 |
| 7  | Saint Lucia                      | 1998 | 0.782389 | 0.602523 |
| 8  | Saint Lucia                      | 1999 | 0.790826 | 0.617421 |
| 9  | Saint Lucia                      | 2000 | 0.790218 | 0.620439 |
| 10 | Saint Lucia                      | 2001 | 0.777224 | 0.604588 |
| 11 | Saint Lucia                      | 2002 | 0.758923 | 0.587237 |
| 12 | Saint Lucia                      | 2003 | 0.760145 | 0.586709 |
| 13 | Saint Lucia                      | 2004 | 0.775105 | 0.596586 |
| 14 | Saint Lucia                      | 2005 | 0.798511 | 0.615856 |
| 15 | Saint Lucia                      | 2006 | 0.810371 | 0.630761 |
| 16 | Saint Lucia                      | 2007 | 0.751768 | 0.58511  |
| 17 | Saint Lucia                      | 2008 | 0.741994 | 0.577525 |
| 18 | Saint Lucia                      | 2009 | 0.750507 | 0.586573 |
| 19 | Saint Lucia                      | 2010 | 0.760554 | 0.601201 |
| 20 | Saint Lucia                      | 2011 | 0.809689 | 0.64893  |
| 21 | Saint Lucia                      | 2012 | 0.822286 | 0.664903 |
| 22 | Saint Lucia                      | 2013 | 0.799342 | 0.645977 |
| 23 | Saint Lucia                      | 2014 | 0.801771 | 0.650044 |
| 24 | Saint Lucia                      | 2015 | 0.793431 | 0.646977 |
| 25 | Saint Lucia                      | 2016 | 0.788999 | 0.642229 |
| 26 | Saint Lucia                      | 2017 | 0.784017 | 0.638882 |
| 27 | Saint Lucia                      | 2018 | 0.780336 | 0.636198 |
| 28 | Saint Lucia                      | 2019 | 0.778887 | 0.635259 |
| 29 | Saint Vincent and the Grenadines | 1990 | 1.055811 | 0.779191 |
| 30 |                                  |      |          |          |
| 31 |                                  |      |          |          |
| 32 |                                  |      |          |          |
| 33 |                                  |      |          |          |
| 34 |                                  |      |          |          |
| 35 |                                  |      |          |          |
| 36 |                                  |      |          |          |
| 37 |                                  |      |          |          |
| 38 |                                  |      |          |          |
| 39 |                                  |      |          |          |
| 40 |                                  |      |          |          |
| 41 |                                  |      |          |          |
| 42 |                                  |      |          |          |
| 43 |                                  |      |          |          |
| 44 |                                  |      |          |          |
| 45 |                                  |      |          |          |
| 46 |                                  |      |          |          |

|    |                                  |      |          |          |
|----|----------------------------------|------|----------|----------|
| 1  |                                  |      |          |          |
| 2  |                                  |      |          |          |
| 3  |                                  |      |          |          |
| 4  |                                  |      |          |          |
| 5  | Saint Vincent and the Grenadines | 1991 | 1.060365 | 0.797731 |
| 6  | Saint Vincent and the Grenadines | 1992 | 1.059923 | 0.810912 |
| 7  | Saint Vincent and the Grenadines | 1993 | 1.059589 | 0.821744 |
| 8  | Saint Vincent and the Grenadines | 1994 | 1.069537 | 0.844344 |
| 9  | Saint Vincent and the Grenadines | 1995 | 0.990095 | 0.786788 |
| 10 | Saint Vincent and the Grenadines | 1996 | 0.92571  | 0.739108 |
| 11 | Saint Vincent and the Grenadines | 1997 | 0.894478 | 0.717007 |
| 12 | Saint Vincent and the Grenadines | 1998 | 0.881609 | 0.708572 |
| 13 | Saint Vincent and the Grenadines | 1999 | 0.895191 | 0.717596 |
| 14 | Saint Vincent and the Grenadines | 2000 | 0.906901 | 0.727819 |
| 15 | Saint Vincent and the Grenadines | 2001 | 0.941204 | 0.766283 |
| 16 | Saint Vincent and the Grenadines | 2002 | 0.931621 | 0.760813 |
| 17 | Saint Vincent and the Grenadines | 2003 | 0.921101 | 0.754886 |
| 18 | Saint Vincent and the Grenadines | 2004 | 0.923713 | 0.758606 |
| 19 | Saint Vincent and the Grenadines | 2005 | 0.929897 | 0.771784 |
| 20 | Saint Vincent and the Grenadines | 2006 | 0.913858 | 0.763832 |
| 21 | Saint Vincent and the Grenadines | 2007 | 0.919976 | 0.775243 |
| 22 | Saint Vincent and the Grenadines | 2008 | 0.938457 | 0.802308 |
| 23 | Saint Vincent and the Grenadines | 2009 | 0.962495 | 0.834135 |
| 24 | Saint Vincent and the Grenadines | 2010 | 0.971071 | 0.849322 |
| 25 | Saint Vincent and the Grenadines | 2011 | 0.979049 | 0.865898 |
| 26 | Saint Vincent and the Grenadines | 2012 | 0.956986 | 0.863578 |
| 27 | Saint Vincent and the Grenadines | 2013 | 0.933168 | 0.860723 |
| 28 | Saint Vincent and the Grenadines | 2014 | 0.921409 | 0.863582 |
| 29 | Saint Vincent and the Grenadines | 2015 | 0.907507 | 0.86158  |
| 30 |                                  |      |          |          |
| 31 |                                  |      |          |          |
| 32 |                                  |      |          |          |
| 33 |                                  |      |          |          |
| 34 |                                  |      |          |          |
| 35 |                                  |      |          |          |
| 36 |                                  |      |          |          |
| 37 |                                  |      |          |          |
| 38 |                                  |      |          |          |
| 39 |                                  |      |          |          |
| 40 |                                  |      |          |          |
| 41 |                                  |      |          |          |
| 42 |                                  |      |          |          |
| 43 |                                  |      |          |          |
| 44 |                                  |      |          |          |
| 45 |                                  |      |          |          |
| 46 |                                  |      |          |          |

1  
2  
3  
4  
5  
6  
7  
8  
9  
10  
11  
12  
13  
14  
15  
16  
17  
18  
19  
20  
21  
22  
23  
24  
25  
26  
27  
28  
29  
30  
31  
32  
33  
34  
35  
36  
37  
38  
39  
40  
41  
42  
43  
44  
45  
46

|                                  |      |          |          |
|----------------------------------|------|----------|----------|
| Saint Vincent and the Grenadines | 2016 | 0.873985 | 0.842537 |
| Saint Vincent and the Grenadines | 2017 | 0.859361 | 0.837012 |
| Saint Vincent and the Grenadines | 2018 | 0.845672 | 0.830576 |
| Saint Vincent and the Grenadines | 2019 | 0.833823 | 0.82454  |
| Samoa                            | 1990 | 0.980132 | 0.843734 |
| Samoa                            | 1991 | 1.000796 | 0.860756 |
| Samoa                            | 1992 | 1.023771 | 0.880098 |
| Samoa                            | 1993 | 1.031447 | 0.887633 |
| Samoa                            | 1994 | 1.049276 | 0.904544 |
| Samoa                            | 1995 | 1.068083 | 0.922056 |
| Samoa                            | 1996 | 1.09226  | 0.944345 |
| Samoa                            | 1997 | 1.116858 | 0.967899 |
| Samoa                            | 1998 | 1.143322 | 0.993029 |
| Samoa                            | 1999 | 1.164018 | 1.012467 |
| Samoa                            | 2000 | 1.177392 | 1.024988 |
| Samoa                            | 2001 | 1.172274 | 1.021756 |
| Samoa                            | 2002 | 1.173842 | 1.024537 |
| Samoa                            | 2003 | 1.149307 | 1.003549 |
| Samoa                            | 2004 | 1.138468 | 0.993735 |
| Samoa                            | 2005 | 1.108915 | 0.967133 |
| Samoa                            | 2006 | 1.073711 | 0.93589  |
| Samoa                            | 2007 | 1.042902 | 0.907576 |
| Samoa                            | 2008 | 1.016908 | 0.884179 |
| Samoa                            | 2009 | 0.997005 | 0.866721 |
| Samoa                            | 2010 | 0.976604 | 0.849334 |

|    |            |      |          |          |
|----|------------|------|----------|----------|
| 5  | Samoa      | 2011 | 0.979265 | 0.852803 |
| 6  | Samoa      | 2012 | 0.968264 | 0.845265 |
| 7  | Samoa      | 2013 | 0.953319 | 0.834396 |
| 8  | Samoa      | 2014 | 0.945781 | 0.83022  |
| 9  | Samoa      | 2015 | 0.951454 | 0.837853 |
| 10 | Samoa      | 2016 | 0.955475 | 0.844459 |
| 11 | Samoa      | 2017 | 0.95904  | 0.851083 |
| 12 | Samoa      | 2018 | 0.959346 | 0.855019 |
| 13 | Samoa      | 2019 | 0.959927 | 0.859111 |
| 14 | San Marino | 1990 | 1.040527 | 0.662137 |
| 15 | San Marino | 1991 | 1.034054 | 0.656258 |
| 16 | San Marino | 1992 | 1.028794 | 0.650989 |
| 17 | San Marino | 1993 | 1.017848 | 0.641779 |
| 18 | San Marino | 1994 | 1.014914 | 0.637147 |
| 19 | San Marino | 1995 | 1.022855 | 0.638643 |
| 20 | San Marino | 1996 | 1.013723 | 0.629773 |
| 21 | San Marino | 1997 | 1.0178   | 0.629635 |
| 22 | San Marino | 1998 | 1.035194 | 0.637541 |
| 23 | San Marino | 1999 | 1.043112 | 0.639273 |
| 24 | San Marino | 2000 | 1.061203 | 0.647772 |
| 25 | San Marino | 2001 | 1.10068  | 0.670472 |
| 26 | San Marino | 2002 | 1.14621  | 0.698311 |
| 27 | San Marino | 2003 | 1.202461 | 0.735765 |
| 28 | San Marino | 2004 | 1.23389  | 0.760178 |
| 29 | San Marino | 2005 | 1.268334 | 0.786763 |

1  
2  
3  
4  
5  
6  
7  
8  
9  
10  
11  
12  
13  
14  
15  
16  
17  
18  
19  
20  
21  
22  
23  
24  
25  
26  
27  
28  
29  
30  
31  
32  
33  
34  
35  
36  
37  
38  
39  
40  
41  
42  
43  
44  
45  
46

|                       |      |          |          |
|-----------------------|------|----------|----------|
| San Marino            | 2006 | 1.273335 | 0.794871 |
| San Marino            | 2007 | 1.275614 | 0.800868 |
| San Marino            | 2008 | 1.277743 | 0.806368 |
| San Marino            | 2009 | 1.28295  | 0.813942 |
| San Marino            | 2010 | 1.285141 | 0.819464 |
| San Marino            | 2011 | 1.287608 | 0.82488  |
| San Marino            | 2012 | 1.291652 | 0.831402 |
| San Marino            | 2013 | 1.289952 | 0.834102 |
| San Marino            | 2014 | 1.286467 | 0.835325 |
| San Marino            | 2015 | 1.283363 | 0.83659  |
| San Marino            | 2016 | 1.277029 | 0.835106 |
| San Marino            | 2017 | 1.264401 | 0.829351 |
| San Marino            | 2018 | 1.251972 | 0.823236 |
| San Marino            | 2019 | 1.24039  | 0.817325 |
| Sao Tome and Principe | 1990 | 1.091374 | 0.933524 |
| Sao Tome and Principe | 1991 | 1.113804 | 0.953047 |
| Sao Tome and Principe | 1992 | 1.139972 | 0.980625 |
| Sao Tome and Principe | 1993 | 1.215059 | 1.081878 |
| Sao Tome and Principe | 1994 | 1.239155 | 1.109895 |
| Sao Tome and Principe | 1995 | 1.238259 | 1.114617 |
| Sao Tome and Principe | 1996 | 1.244594 | 1.125181 |
| Sao Tome and Principe | 1997 | 1.254845 | 1.138117 |
| Sao Tome and Principe | 1998 | 1.258592 | 1.1408   |
| Sao Tome and Principe | 1999 | 1.273254 | 1.152136 |
| Sao Tome and Principe | 2000 | 1.308013 | 1.172362 |

|    |                       |      |          |          |
|----|-----------------------|------|----------|----------|
| 1  |                       |      |          |          |
| 2  |                       |      |          |          |
| 3  |                       |      |          |          |
| 4  |                       |      |          |          |
| 5  | Sao Tome and Principe | 2001 | 1.29916  | 1.159733 |
| 6  | Sao Tome and Principe | 2002 | 1.282631 | 1.149629 |
| 7  | Sao Tome and Principe | 2003 | 1.269253 | 1.131711 |
| 8  | Sao Tome and Principe | 2004 | 1.255308 | 1.12558  |
| 9  | Sao Tome and Principe | 2005 | 1.212922 | 1.088347 |
| 10 | Sao Tome and Principe | 2006 | 1.221649 | 1.093759 |
| 11 | Sao Tome and Principe | 2007 | 1.246116 | 1.111153 |
| 12 | Sao Tome and Principe | 2008 | 1.226771 | 1.095035 |
| 13 | Sao Tome and Principe | 2009 | 1.23417  | 1.099047 |
| 14 | Sao Tome and Principe | 2010 | 1.258555 | 1.117148 |
| 15 | Sao Tome and Principe | 2011 | 1.232555 | 1.096997 |
| 16 | Sao Tome and Principe | 2012 | 1.205056 | 1.075871 |
| 17 | Sao Tome and Principe | 2013 | 1.198096 | 1.069787 |
| 18 | Sao Tome and Principe | 2014 | 1.213287 | 1.080153 |
| 19 | Sao Tome and Principe | 2015 | 1.213986 | 1.080881 |
| 20 | Sao Tome and Principe | 2016 | 1.216079 | 1.082527 |
| 21 | Sao Tome and Principe | 2017 | 1.219651 | 1.086355 |
| 22 | Sao Tome and Principe | 2018 | 1.220924 | 1.08889  |
| 23 | Sao Tome and Principe | 2019 | 1.219127 | 1.08909  |
| 24 | Saudi Arabia          | 1990 | 0.695398 | 0.829786 |
| 25 | Saudi Arabia          | 1991 | 0.712169 | 0.854348 |
| 26 | Saudi Arabia          | 1992 | 0.719496 | 0.867184 |
| 27 | Saudi Arabia          | 1993 | 0.727002 | 0.878748 |
| 28 | Saudi Arabia          | 1994 | 0.742709 | 0.898777 |
| 29 | Saudi Arabia          | 1995 | 0.761874 | 0.922789 |
| 30 |                       |      |          |          |
| 31 |                       |      |          |          |
| 32 |                       |      |          |          |
| 33 |                       |      |          |          |
| 34 |                       |      |          |          |
| 35 |                       |      |          |          |
| 36 |                       |      |          |          |
| 37 |                       |      |          |          |
| 38 |                       |      |          |          |
| 39 |                       |      |          |          |
| 40 |                       |      |          |          |
| 41 |                       |      |          |          |
| 42 |                       |      |          |          |
| 43 |                       |      |          |          |
| 44 |                       |      |          |          |
| 45 |                       |      |          |          |
| 46 |                       |      |          |          |

1  
2  
3  
4  
5  
6  
7  
8  
9  
10  
11  
12  
13  
14  
15  
16  
17  
18  
19  
20  
21  
22  
23  
24  
25  
26  
27  
28  
29  
30  
31  
32  
33  
34  
35  
36  
37  
38  
39  
40  
41  
42  
43  
44  
45  
46

|              |      |          |          |
|--------------|------|----------|----------|
| Saudi Arabia | 1996 | 0.784305 | 0.947356 |
| Saudi Arabia | 1997 | 0.804263 | 0.967726 |
| Saudi Arabia | 1998 | 0.810679 | 0.973063 |
| Saudi Arabia | 1999 | 0.816395 | 0.976741 |
| Saudi Arabia | 2000 | 0.820477 | 0.983554 |
| Saudi Arabia | 2001 | 0.821211 | 0.976888 |
| Saudi Arabia | 2002 | 0.827178 | 0.977433 |
| Saudi Arabia | 2003 | 0.822493 | 0.962185 |
| Saudi Arabia | 2004 | 0.821679 | 0.95553  |
| Saudi Arabia | 2005 | 0.815244 | 0.948694 |
| Saudi Arabia | 2006 | 0.810154 | 0.94029  |
| Saudi Arabia | 2007 | 0.800765 | 0.931723 |
| Saudi Arabia | 2008 | 0.786844 | 0.922069 |
| Saudi Arabia | 2009 | 0.772323 | 0.91303  |
| Saudi Arabia | 2010 | 0.76119  | 0.911913 |
| Saudi Arabia | 2011 | 0.745556 | 0.899816 |
| Saudi Arabia | 2012 | 0.73911  | 0.89891  |
| Saudi Arabia | 2013 | 0.736146 | 0.907402 |
| Saudi Arabia | 2014 | 0.739157 | 0.923105 |
| Saudi Arabia | 2015 | 0.740954 | 0.940363 |
| Saudi Arabia | 2016 | 0.745207 | 0.95483  |
| Saudi Arabia | 2017 | 0.752481 | 0.975445 |
| Saudi Arabia | 2018 | 0.758989 | 0.995576 |
| Saudi Arabia | 2019 | 0.763422 | 1.013679 |
| Senegal      | 1990 | 0.884747 | 0.858724 |

|         |      |          |          |
|---------|------|----------|----------|
| Senegal | 1991 | 0.891844 | 0.862058 |
| Senegal | 1992 | 0.896679 | 0.863392 |
| Senegal | 1993 | 0.898105 | 0.862398 |
| Senegal | 1994 | 0.899111 | 0.862183 |
| Senegal | 1995 | 0.899343 | 0.859763 |
| Senegal | 1996 | 0.898532 | 0.857803 |
| Senegal | 1997 | 0.886586 | 0.844268 |
| Senegal | 1998 | 0.88376  | 0.840365 |
| Senegal | 1999 | 0.881527 | 0.836596 |
| Senegal | 2000 | 0.879275 | 0.831594 |
| Senegal | 2001 | 0.872506 | 0.825969 |
| Senegal | 2002 | 0.870204 | 0.822799 |
| Senegal | 2003 | 0.873973 | 0.821234 |
| Senegal | 2004 | 0.850079 | 0.798413 |
| Senegal | 2005 | 0.827835 | 0.77646  |
| Senegal | 2006 | 0.808141 | 0.756535 |
| Senegal | 2007 | 0.794045 | 0.741842 |
| Senegal | 2008 | 0.77887  | 0.72756  |
| Senegal | 2009 | 0.767907 | 0.716548 |
| Senegal | 2010 | 0.767865 | 0.711673 |
| Senegal | 2011 | 0.767131 | 0.709302 |
| Senegal | 2012 | 0.765409 | 0.707099 |
| Senegal | 2013 | 0.761534 | 0.704161 |
| Senegal | 2014 | 0.764675 | 0.707866 |
| Senegal | 2015 | 0.770795 | 0.712137 |



|         |      |          |          |
|---------|------|----------|----------|
| Senegal | 2016 | 0.779506 | 0.720298 |
| Senegal | 2017 | 0.787654 | 0.727948 |
| Senegal | 2018 | 0.79524  | 0.735888 |
| Senegal | 2019 | 0.802915 | 0.743064 |
| Serbia  | 1990 | 0.73799  | 0.603061 |
| Serbia  | 1991 | 0.751915 | 0.61215  |
| Serbia  | 1992 | 0.745895 | 0.598418 |
| Serbia  | 1993 | 0.766901 | 0.611856 |
| Serbia  | 1994 | 0.781888 | 0.620647 |
| Serbia  | 1995 | 0.792746 | 0.626364 |
| Serbia  | 1996 | 0.802507 | 0.635855 |
| Serbia  | 1997 | 0.815138 | 0.652642 |
| Serbia  | 1998 | 0.778837 | 0.621888 |
| Serbia  | 1999 | 0.794648 | 0.623776 |
| Serbia  | 2000 | 0.769534 | 0.605957 |
| Serbia  | 2001 | 0.77247  | 0.605364 |
| Serbia  | 2002 | 0.734907 | 0.574323 |
| Serbia  | 2003 | 0.746359 | 0.581392 |
| Serbia  | 2004 | 0.746084 | 0.578442 |
| Serbia  | 2005 | 0.760475 | 0.588941 |
| Serbia  | 2006 | 0.76393  | 0.589334 |
| Serbia  | 2007 | 0.77937  | 0.595466 |
| Serbia  | 2008 | 0.801348 | 0.61088  |
| Serbia  | 2009 | 0.83196  | 0.636222 |
| Serbia  | 2010 | 0.852949 | 0.653777 |

|            |      |          |          |
|------------|------|----------|----------|
| Serbia     | 2011 | 0.863156 | 0.660403 |
| Serbia     | 2012 | 0.88227  | 0.670731 |
| Serbia     | 2013 | 0.853039 | 0.639376 |
| Serbia     | 2014 | 0.87394  | 0.650601 |
| Serbia     | 2015 | 0.899328 | 0.670437 |
| Serbia     | 2016 | 0.926887 | 0.690613 |
| Serbia     | 2017 | 0.925711 | 0.690169 |
| Serbia     | 2018 | 0.933605 | 0.693648 |
| Serbia     | 2019 | 0.933707 | 0.696426 |
| Seychelles | 1990 | 1.017107 | 0.702428 |
| Seychelles | 1991 | 1.020898 | 0.697742 |
| Seychelles | 1992 | 1.022397 | 0.693457 |
| Seychelles | 1993 | 1.02782  | 0.692034 |
| Seychelles | 1994 | 1.017442 | 0.68456  |
| Seychelles | 1995 | 1.016606 | 0.679526 |
| Seychelles | 1996 | 1.045304 | 0.695115 |
| Seychelles | 1997 | 1.092161 | 0.725276 |
| Seychelles | 1998 | 1.128929 | 0.75104  |
| Seychelles | 1999 | 1.142566 | 0.765246 |
| Seychelles | 2000 | 1.186127 | 0.802943 |
| Seychelles | 2001 | 1.202158 | 0.822396 |
| Seychelles | 2002 | 1.188011 | 0.82041  |
| Seychelles | 2003 | 1.171268 | 0.813173 |
| Seychelles | 2004 | 1.209464 | 0.842131 |
| Seychelles | 2005 | 1.169282 | 0.805472 |

1  
2  
3  
4  
5  
6  
7  
8  
9  
10  
11  
12  
13  
14  
15  
16  
17  
18  
19  
20  
21  
22  
23  
24  
25  
26  
27  
28  
29  
30  
31  
32  
33  
34  
35  
36  
37  
38  
39  
40  
41  
42  
43  
44  
45  
46

|              |      |          |          |
|--------------|------|----------|----------|
| Seychelles   | 2006 | 1.185979 | 0.818787 |
| Seychelles   | 2007 | 1.214313 | 0.845111 |
| Seychelles   | 2008 | 1.2311   | 0.859386 |
| Seychelles   | 2009 | 1.197098 | 0.834808 |
| Seychelles   | 2010 | 1.212228 | 0.867157 |
| Seychelles   | 2011 | 1.228304 | 0.902733 |
| Seychelles   | 2012 | 1.192854 | 0.880645 |
| Seychelles   | 2013 | 1.216633 | 0.907188 |
| Seychelles   | 2014 | 1.212517 | 0.925165 |
| Seychelles   | 2015 | 1.169363 | 0.915602 |
| Seychelles   | 2016 | 1.134994 | 0.909444 |
| Seychelles   | 2017 | 1.109851 | 0.89732  |
| Seychelles   | 2018 | 1.097048 | 0.897572 |
| Seychelles   | 2019 | 1.082504 | 0.898742 |
| Sierra Leone | 1990 | 0.787919 | 0.795377 |
| Sierra Leone | 1991 | 0.790962 | 0.792612 |
| Sierra Leone | 1992 | 0.792598 | 0.791321 |
| Sierra Leone | 1993 | 0.792881 | 0.789444 |
| Sierra Leone | 1994 | 0.810527 | 0.795239 |
| Sierra Leone | 1995 | 0.815354 | 0.795979 |
| Sierra Leone | 1996 | 0.830066 | 0.804332 |
| Sierra Leone | 1997 | 0.84446  | 0.812131 |
| Sierra Leone | 1998 | 0.851017 | 0.812806 |
| Sierra Leone | 1999 | 0.863143 | 0.810965 |
| Sierra Leone | 2000 | 0.867725 | 0.81152  |

|    |              |      |          |          |
|----|--------------|------|----------|----------|
| 1  |              |      |          |          |
| 2  |              |      |          |          |
| 3  |              |      |          |          |
| 4  |              |      |          |          |
| 5  | Sierra Leone | 2001 | 0.870057 | 0.807892 |
| 6  | Sierra Leone | 2002 | 0.88269  | 0.814524 |
| 7  | Sierra Leone | 2003 | 0.887295 | 0.814107 |
| 8  | Sierra Leone | 2004 | 0.904772 | 0.819484 |
| 9  | Sierra Leone | 2005 | 0.902009 | 0.816075 |
| 10 | Sierra Leone | 2006 | 0.904874 | 0.816248 |
| 11 | Sierra Leone | 2007 | 0.908455 | 0.817708 |
| 12 | Sierra Leone | 2008 | 0.9111   | 0.81823  |
| 13 | Sierra Leone | 2009 | 0.916357 | 0.819564 |
| 14 | Sierra Leone | 2010 | 0.905713 | 0.815749 |
| 15 | Sierra Leone | 2011 | 0.90687  | 0.815569 |
| 16 | Sierra Leone | 2012 | 0.900591 | 0.815611 |
| 17 | Sierra Leone | 2013 | 0.898045 | 0.816791 |
| 18 | Sierra Leone | 2014 | 0.901668 | 0.824467 |
| 19 | Sierra Leone | 2015 | 0.894141 | 0.823506 |
| 20 | Sierra Leone | 2016 | 0.895925 | 0.830446 |
| 21 | Sierra Leone | 2017 | 0.895543 | 0.833929 |
| 22 | Sierra Leone | 2018 | 0.89368  | 0.835265 |
| 23 | Sierra Leone | 2019 | 0.891018 | 0.836793 |
| 24 | Singapore    | 1990 | 1.163438 | 0.899451 |
| 25 | Singapore    | 1991 | 1.129393 | 0.881363 |
| 26 | Singapore    | 1992 | 1.153563 | 0.921822 |
| 27 | Singapore    | 1993 | 1.116385 | 0.896281 |
| 28 | Singapore    | 1994 | 1.076889 | 0.845189 |
| 29 | Singapore    | 1995 | 1.050864 | 0.825318 |
| 30 |              |      |          |          |
| 31 |              |      |          |          |
| 32 |              |      |          |          |
| 33 |              |      |          |          |
| 34 |              |      |          |          |
| 35 |              |      |          |          |
| 36 |              |      |          |          |
| 37 |              |      |          |          |
| 38 |              |      |          |          |
| 39 |              |      |          |          |
| 40 |              |      |          |          |
| 41 |              |      |          |          |
| 42 |              |      |          |          |
| 43 |              |      |          |          |
| 44 |              |      |          |          |
| 45 |              |      |          |          |
| 46 |              |      |          |          |

|    |           |      |          |          |
|----|-----------|------|----------|----------|
| 1  |           |      |          |          |
| 2  |           |      |          |          |
| 3  |           |      |          |          |
| 4  |           |      |          |          |
| 5  | Singapore | 1996 | 1.071672 | 0.841391 |
| 6  | Singapore | 1997 | 1.106303 | 0.867415 |
| 7  | Singapore | 1998 | 1.083205 | 0.853333 |
| 8  | Singapore | 1999 | 1.096735 | 0.864456 |
| 9  | Singapore | 2000 | 1.107024 | 0.8751   |
| 10 | Singapore | 2001 | 1.12114  | 0.885171 |
| 11 | Singapore | 2002 | 1.135497 | 0.893845 |
| 12 | Singapore | 2003 | 1.181337 | 0.921314 |
| 13 | Singapore | 2004 | 1.240904 | 0.956691 |
| 14 | Singapore | 2005 | 1.124899 | 0.861722 |
| 15 | Singapore | 2006 | 1.140442 | 0.868721 |
| 16 | Singapore | 2007 | 1.129855 | 0.864193 |
| 17 | Singapore | 2008 | 1.16467  | 0.901644 |
| 18 | Singapore | 2009 | 1.191044 | 0.920265 |
| 19 | Singapore | 2010 | 1.184357 | 0.90915  |
| 20 | Singapore | 2011 | 1.179199 | 0.910006 |
| 21 | Singapore | 2012 | 1.200217 | 0.933094 |
| 22 | Singapore | 2013 | 1.208179 | 0.949316 |
| 23 | Singapore | 2014 | 1.211514 | 0.953871 |
| 24 | Singapore | 2015 | 1.211928 | 0.960929 |
| 25 | Singapore | 2016 | 1.199671 | 0.951955 |
| 26 | Singapore | 2017 | 1.233326 | 0.968313 |
| 27 | Singapore | 2018 | 1.219639 | 0.959599 |
| 28 | Singapore | 2019 | 1.250283 | 0.991418 |
| 29 | Slovakia  | 1990 | 0.944649 | 0.647308 |
| 30 |           |      |          |          |
| 31 |           |      |          |          |
| 32 |           |      |          |          |
| 33 |           |      |          |          |
| 34 |           |      |          |          |
| 35 |           |      |          |          |
| 36 |           |      |          |          |
| 37 |           |      |          |          |
| 38 |           |      |          |          |
| 39 |           |      |          |          |
| 40 |           |      |          |          |
| 41 |           |      |          |          |
| 42 |           |      |          |          |
| 43 |           |      |          |          |
| 44 |           |      |          |          |
| 45 |           |      |          |          |
| 46 |           |      |          |          |

|          |      |          |          |
|----------|------|----------|----------|
| Slovakia | 1991 | 0.976455 | 0.663918 |
| Slovakia | 1992 | 0.955654 | 0.644376 |
| Slovakia | 1993 | 0.995726 | 0.665691 |
| Slovakia | 1994 | 1.009351 | 0.670677 |
| Slovakia | 1995 | 1.017436 | 0.674329 |
| Slovakia | 1996 | 1.009444 | 0.668133 |
| Slovakia | 1997 | 1.04119  | 0.687493 |
| Slovakia | 1998 | 0.992929 | 0.652283 |
| Slovakia | 1999 | 1.009819 | 0.657257 |
| Slovakia | 2000 | 0.975233 | 0.628247 |
| Slovakia | 2001 | 1.011914 | 0.645803 |
| Slovakia | 2002 | 0.985897 | 0.625087 |
| Slovakia | 2003 | 1.008043 | 0.633926 |
| Slovakia | 2004 | 1.051345 | 0.654676 |
| Slovakia | 2005 | 1.036508 | 0.64108  |
| Slovakia | 2006 | 1.062665 | 0.651686 |
| Slovakia | 2007 | 1.109865 | 0.678383 |
| Slovakia | 2008 | 1.093175 | 0.663884 |
| Slovakia | 2009 | 1.159077 | 0.696465 |
| Slovakia | 2010 | 1.148256 | 0.682306 |
| Slovakia | 2011 | 1.191118 | 0.703254 |
| Slovakia | 2012 | 1.21351  | 0.711767 |
| Slovakia | 2013 | 1.232331 | 0.720047 |
| Slovakia | 2014 | 1.222608 | 0.714766 |
| Slovakia | 2015 | 1.233158 | 0.725429 |

|    |          |      |          |          |
|----|----------|------|----------|----------|
| 1  |          |      |          |          |
| 2  |          |      |          |          |
| 3  |          |      |          |          |
| 4  |          |      |          |          |
| 5  | Slovakia | 2016 | 1.258443 | 0.742765 |
| 6  | Slovakia | 2017 | 1.250698 | 0.743898 |
| 7  | Slovakia | 2018 | 1.27032  | 0.760949 |
| 8  | Slovakia | 2019 | 1.267158 | 0.765874 |
| 9  |          |      |          |          |
| 10 | Slovenia | 1990 | 1.394688 | 0.780119 |
| 11 | Slovenia | 1991 | 1.410467 | 0.783523 |
| 12 | Slovenia | 1992 | 1.400783 | 0.768944 |
| 13 | Slovenia | 1993 | 1.378885 | 0.753192 |
| 14 | Slovenia | 1994 | 1.367196 | 0.740969 |
| 15 | Slovenia | 1995 | 1.317961 | 0.708775 |
| 16 | Slovenia | 1996 | 1.350995 | 0.720329 |
| 17 | Slovenia | 1997 | 1.295705 | 0.687694 |
| 18 | Slovenia | 1998 | 1.251271 | 0.658323 |
| 19 | Slovenia | 1999 | 1.262306 | 0.65755  |
| 20 | Slovenia | 2000 | 1.298258 | 0.663913 |
| 21 | Slovenia | 2001 | 1.266181 | 0.640215 |
| 22 | Slovenia | 2002 | 1.25989  | 0.622485 |
| 23 | Slovenia | 2003 | 1.165627 | 0.569175 |
| 24 | Slovenia | 2004 | 1.286114 | 0.622716 |
| 25 | Slovenia | 2005 | 1.400384 | 0.668478 |
| 26 | Slovenia | 2006 | 1.322378 | 0.627958 |
| 27 | Slovenia | 2007 | 1.411386 | 0.663917 |
| 28 | Slovenia | 2008 | 1.384634 | 0.647061 |
| 29 | Slovenia | 2009 | 1.44464  | 0.669581 |
| 30 | Slovenia | 2010 | 1.445478 | 0.668507 |
| 31 |          |      |          |          |
| 32 |          |      |          |          |
| 33 |          |      |          |          |
| 34 |          |      |          |          |
| 35 |          |      |          |          |
| 36 |          |      |          |          |
| 37 |          |      |          |          |
| 38 |          |      |          |          |
| 39 |          |      |          |          |
| 40 |          |      |          |          |
| 41 |          |      |          |          |
| 42 |          |      |          |          |
| 43 |          |      |          |          |
| 44 |          |      |          |          |
| 45 |          |      |          |          |
| 46 |          |      |          |          |

|                 |      |          |          |
|-----------------|------|----------|----------|
| Slovenia        | 2011 | 1.438805 | 0.663727 |
| Slovenia        | 2012 | 1.439959 | 0.665578 |
| Slovenia        | 2013 | 1.378243 | 0.641181 |
| Slovenia        | 2014 | 1.367799 | 0.636246 |
| Slovenia        | 2015 | 1.284322 | 0.602005 |
| Slovenia        | 2016 | 1.278014 | 0.603165 |
| Slovenia        | 2017 | 1.264785 | 0.601053 |
| Slovenia        | 2018 | 1.263189 | 0.607731 |
| Slovenia        | 2019 | 1.258858 | 0.612691 |
| Solomon Islands | 1990 | 1.037928 | 1.144353 |
| Solomon Islands | 1991 | 1.044417 | 1.148198 |
| Solomon Islands | 1992 | 1.056013 | 1.156976 |
| Solomon Islands | 1993 | 1.066592 | 1.164159 |
| Solomon Islands | 1994 | 1.081983 | 1.175924 |
| Solomon Islands | 1995 | 1.097222 | 1.188241 |
| Solomon Islands | 1996 | 1.117544 | 1.206361 |
| Solomon Islands | 1997 | 1.138033 | 1.223701 |
| Solomon Islands | 1998 | 1.159552 | 1.241819 |
| Solomon Islands | 1999 | 1.178626 | 1.257071 |
| Solomon Islands | 2000 | 1.186507 | 1.258405 |
| Solomon Islands | 2001 | 1.182493 | 1.246874 |
| Solomon Islands | 2002 | 1.179042 | 1.236279 |
| Solomon Islands | 2003 | 1.182097 | 1.232562 |
| Solomon Islands | 2004 | 1.190252 | 1.233961 |
| Solomon Islands | 2005 | 1.191227 | 1.229107 |



1  
2  
3  
4  
5  
6  
7  
8  
9  
10  
11  
12  
13  
14  
15  
16  
17  
18  
19  
20  
21  
22  
23  
24  
25  
26  
27  
28  
29  
30  
31  
32  
33  
34  
35  
36  
37  
38  
39  
40  
41  
42  
43  
44  
45  
46

|                 |      |          |          |
|-----------------|------|----------|----------|
| Solomon Islands | 2006 | 1.175755 | 1.207357 |
| Solomon Islands | 2007 | 1.14858  | 1.174414 |
| Solomon Islands | 2008 | 1.102099 | 1.123378 |
| Solomon Islands | 2009 | 1.094535 | 1.111581 |
| Solomon Islands | 2010 | 1.074319 | 1.088844 |
| Solomon Islands | 2011 | 1.065332 | 1.078571 |
| Solomon Islands | 2012 | 1.049638 | 1.061376 |
| Solomon Islands | 2013 | 1.034952 | 1.044876 |
| Solomon Islands | 2014 | 1.026433 | 1.034451 |
| Solomon Islands | 2015 | 1.016654 | 1.022379 |
| Solomon Islands | 2016 | 1.007093 | 1.010933 |
| Solomon Islands | 2017 | 0.991614 | 0.993079 |
| Solomon Islands | 2018 | 0.970301 | 0.971456 |
| Solomon Islands | 2019 | 0.977609 | 0.976166 |
| Somalia         | 1990 | 0.750322 | 0.611496 |
| Somalia         | 1991 | 0.74324  | 0.601044 |
| Somalia         | 1992 | 0.728936 | 0.588467 |
| Somalia         | 1993 | 0.714142 | 0.574841 |
| Somalia         | 1994 | 0.705603 | 0.566449 |
| Somalia         | 1995 | 0.699071 | 0.560185 |
| Somalia         | 1996 | 0.704283 | 0.563338 |
| Somalia         | 1997 | 0.712917 | 0.569484 |
| Somalia         | 1998 | 0.723135 | 0.5768   |
| Somalia         | 1999 | 0.733781 | 0.58339  |
| Somalia         | 2000 | 0.743    | 0.588414 |

|              |      |          |          |
|--------------|------|----------|----------|
| Somalia      | 2001 | 0.755732 | 0.596479 |
| Somalia      | 2002 | 0.769071 | 0.604926 |
| Somalia      | 2003 | 0.784596 | 0.615255 |
| Somalia      | 2004 | 0.799497 | 0.62424  |
| Somalia      | 2005 | 0.813829 | 0.632367 |
| Somalia      | 2006 | 0.821399 | 0.634753 |
| Somalia      | 2007 | 0.832464 | 0.639935 |
| Somalia      | 2008 | 0.844469 | 0.644877 |
| Somalia      | 2009 | 0.85818  | 0.653139 |
| Somalia      | 2010 | 0.85573  | 0.64884  |
| Somalia      | 2011 | 0.853771 | 0.646719 |
| Somalia      | 2012 | 0.851149 | 0.646331 |
| Somalia      | 2013 | 0.850363 | 0.64823  |
| Somalia      | 2014 | 0.848187 | 0.649933 |
| Somalia      | 2015 | 0.846803 | 0.652619 |
| Somalia      | 2016 | 0.845299 | 0.654947 |
| Somalia      | 2017 | 0.842177 | 0.656193 |
| Somalia      | 2018 | 0.839293 | 0.655624 |
| Somalia      | 2019 | 0.839583 | 0.657314 |
| South Africa | 1990 | 0.872624 | 0.604062 |
| South Africa | 1991 | 0.844694 | 0.582752 |
| South Africa | 1992 | 0.912175 | 0.626358 |
| South Africa | 1993 | 0.863401 | 0.593813 |
| South Africa | 1994 | 0.89675  | 0.613044 |
| South Africa | 1995 | 0.800476 | 0.54839  |

|    |              |      |          |          |
|----|--------------|------|----------|----------|
| 1  |              |      |          |          |
| 2  |              |      |          |          |
| 3  |              |      |          |          |
| 4  |              |      |          |          |
| 5  | South Africa | 1996 | 0.806957 | 0.550274 |
| 6  | South Africa | 1997 | 0.857876 | 0.580401 |
| 7  | South Africa | 1998 | 0.839139 | 0.565984 |
| 8  | South Africa | 1999 | 0.862781 | 0.575683 |
| 9  | South Africa | 2000 | 0.883991 | 0.586252 |
| 10 | South Africa | 2001 | 0.882307 | 0.581695 |
| 11 | South Africa | 2002 | 0.886612 | 0.581614 |
| 12 | South Africa | 2003 | 0.883797 | 0.577566 |
| 13 | South Africa | 2004 | 0.881778 | 0.576085 |
| 14 | South Africa | 2005 | 0.876284 | 0.573943 |
| 15 | South Africa | 2006 | 0.875827 | 0.572977 |
| 16 | South Africa | 2007 | 0.865365 | 0.567608 |
| 17 | South Africa | 2008 | 0.86076  | 0.56512  |
| 18 | South Africa | 2009 | 0.858824 | 0.563312 |
| 19 | South Africa | 2010 | 0.859822 | 0.560691 |
| 20 | South Africa | 2011 | 0.874497 | 0.566917 |
| 21 | South Africa | 2012 | 0.883077 | 0.573793 |
| 22 | South Africa | 2013 | 0.891229 | 0.580179 |
| 23 | South Africa | 2014 | 0.904752 | 0.590606 |
| 24 | South Africa | 2015 | 0.907736 | 0.594396 |
| 25 | South Africa | 2016 | 0.90994  | 0.594798 |
| 26 | South Africa | 2017 | 0.893752 | 0.587799 |
| 27 | South Africa | 2018 | 0.874707 | 0.580501 |
| 28 | South Africa | 2019 | 0.872436 | 0.582659 |
| 29 | South Sudan  | 1990 | 0.617642 | 0.646117 |
| 30 |              |      |          |          |
| 31 |              |      |          |          |
| 32 |              |      |          |          |
| 33 |              |      |          |          |
| 34 |              |      |          |          |
| 35 |              |      |          |          |
| 36 |              |      |          |          |
| 37 |              |      |          |          |
| 38 |              |      |          |          |
| 39 |              |      |          |          |
| 40 |              |      |          |          |
| 41 |              |      |          |          |
| 42 |              |      |          |          |
| 43 |              |      |          |          |
| 44 |              |      |          |          |
| 45 |              |      |          |          |
| 46 |              |      |          |          |

|             |      |          |          |
|-------------|------|----------|----------|
| South Sudan | 1991 | 0.608182 | 0.639096 |
| South Sudan | 1992 | 0.59649  | 0.630499 |
| South Sudan | 1993 | 0.583919 | 0.620618 |
| South Sudan | 1994 | 0.575092 | 0.614212 |
| South Sudan | 1995 | 0.56239  | 0.606514 |
| South Sudan | 1996 | 0.563369 | 0.609884 |
| South Sudan | 1997 | 0.563668 | 0.611578 |
| South Sudan | 1998 | 0.567632 | 0.617846 |
| South Sudan | 1999 | 0.571434 | 0.623961 |
| South Sudan | 2000 | 0.574652 | 0.628503 |
| South Sudan | 2001 | 0.579118 | 0.634668 |
| South Sudan | 2002 | 0.583072 | 0.639749 |
| South Sudan | 2003 | 0.588461 | 0.647561 |
| South Sudan | 2004 | 0.592934 | 0.651815 |
| South Sudan | 2005 | 0.600938 | 0.657757 |
| South Sudan | 2006 | 0.602378 | 0.65759  |
| South Sudan | 2007 | 0.601339 | 0.654603 |
| South Sudan | 2008 | 0.600134 | 0.650473 |
| South Sudan | 2009 | 0.605369 | 0.654527 |
| South Sudan | 2010 | 0.609132 | 0.657795 |
| South Sudan | 2011 | 0.617707 | 0.666383 |
| South Sudan | 2012 | 0.626237 | 0.674514 |
| South Sudan | 2013 | 0.637096 | 0.682281 |
| South Sudan | 2014 | 0.646201 | 0.689662 |
| South Sudan | 2015 | 0.658325 | 0.698963 |

1  
2  
3  
4  
5  
6  
7  
8  
9  
10  
11  
12  
13  
14  
15  
16  
17  
18  
19  
20  
21  
22  
23  
24  
25  
26  
27  
28  
29  
30  
31  
32  
33  
34  
35  
36  
37  
38  
39  
40  
41  
42  
43  
44  
45  
46

|             |      |          |          |
|-------------|------|----------|----------|
| South Sudan | 2016 | 0.66504  | 0.704405 |
| South Sudan | 2017 | 0.668702 | 0.710524 |
| South Sudan | 2018 | 0.674969 | 0.717543 |
| South Sudan | 2019 | 0.681735 | 0.723315 |
| Spain       | 1990 | 1.141463 | 0.683647 |
| Spain       | 1991 | 1.147613 | 0.682843 |
| Spain       | 1992 | 1.158914 | 0.68726  |
| Spain       | 1993 | 1.175718 | 0.693078 |
| Spain       | 1994 | 1.192094 | 0.698995 |
| Spain       | 1995 | 1.19173  | 0.693909 |
| Spain       | 1996 | 1.207036 | 0.697607 |
| Spain       | 1997 | 1.226235 | 0.7048   |
| Spain       | 1998 | 1.217732 | 0.695168 |
| Spain       | 1999 | 1.20048  | 0.682673 |
| Spain       | 2000 | 1.228318 | 0.693744 |
| Spain       | 2001 | 1.242731 | 0.698067 |
| Spain       | 2002 | 1.238513 | 0.693436 |
| Spain       | 2003 | 1.246203 | 0.693896 |
| Spain       | 2004 | 1.251368 | 0.694341 |
| Spain       | 2005 | 1.253901 | 0.692857 |
| Spain       | 2006 | 1.261916 | 0.693236 |
| Spain       | 2007 | 1.25726  | 0.689482 |
| Spain       | 2008 | 1.266641 | 0.690584 |
| Spain       | 2009 | 1.271022 | 0.691003 |
| Spain       | 2010 | 1.264498 | 0.682622 |

|           |      |          |          |
|-----------|------|----------|----------|
| Spain     | 2011 | 1.291473 | 0.694299 |
| Spain     | 2012 | 1.314847 | 0.704675 |
| Spain     | 2013 | 1.344507 | 0.71982  |
| Spain     | 2014 | 1.360219 | 0.725666 |
| Spain     | 2015 | 1.372704 | 0.730595 |
| Spain     | 2016 | 1.381235 | 0.734868 |
| Spain     | 2017 | 1.36967  | 0.731334 |
| Spain     | 2018 | 1.393998 | 0.747474 |
| Spain     | 2019 | 1.395263 | 0.752339 |
| Sri Lanka | 1990 | 0.565329 | 0.584802 |
| Sri Lanka | 1991 | 0.578904 | 0.591445 |
| Sri Lanka | 1992 | 0.585931 | 0.589963 |
| Sri Lanka | 1993 | 0.613223 | 0.609778 |
| Sri Lanka | 1994 | 0.622568 | 0.615605 |
| Sri Lanka | 1995 | 0.602386 | 0.593602 |
| Sri Lanka | 1996 | 0.63306  | 0.6159   |
| Sri Lanka | 1997 | 0.659262 | 0.633113 |
| Sri Lanka | 1998 | 0.676796 | 0.64036  |
| Sri Lanka | 1999 | 0.692609 | 0.64573  |
| Sri Lanka | 2000 | 0.697856 | 0.645993 |
| Sri Lanka | 2001 | 0.702683 | 0.642068 |
| Sri Lanka | 2002 | 0.734883 | 0.662004 |
| Sri Lanka | 2003 | 0.748233 | 0.669226 |
| Sri Lanka | 2004 | 0.782674 | 0.693991 |
| Sri Lanka | 2005 | 0.793452 | 0.698699 |

1  
2  
3  
4  
5  
6  
7  
8  
9  
10  
11  
12  
13  
14  
15  
16  
17  
18  
19  
20  
21  
22  
23  
24  
25  
26  
27  
28  
29  
30  
31  
32  
33  
34  
35  
36  
37  
38  
39  
40  
41  
42  
43  
44  
45  
46

|           |      |          |          |
|-----------|------|----------|----------|
| Sri Lanka | 2006 | 0.819849 | 0.71548  |
| Sri Lanka | 2007 | 0.814719 | 0.702651 |
| Sri Lanka | 2008 | 0.806527 | 0.685378 |
| Sri Lanka | 2009 | 0.883706 | 0.741235 |
| Sri Lanka | 2010 | 0.855375 | 0.717334 |
| Sri Lanka | 2011 | 0.818618 | 0.683409 |
| Sri Lanka | 2012 | 0.786608 | 0.649113 |
| Sri Lanka | 2013 | 0.801781 | 0.655676 |
| Sri Lanka | 2014 | 0.796339 | 0.645695 |
| Sri Lanka | 2015 | 0.801576 | 0.645614 |
| Sri Lanka | 2016 | 0.807734 | 0.645914 |
| Sri Lanka | 2017 | 0.816588 | 0.648192 |
| Sri Lanka | 2018 | 0.838493 | 0.661592 |
| Sri Lanka | 2019 | 0.845783 | 0.662182 |
| Sudan     | 1990 | 0.915215 | 0.883364 |
| Sudan     | 1991 | 0.89466  | 0.868908 |
| Sudan     | 1992 | 0.88086  | 0.859938 |
| Sudan     | 1993 | 0.868571 | 0.852353 |
| Sudan     | 1994 | 0.862812 | 0.850964 |
| Sudan     | 1995 | 0.858514 | 0.851763 |
| Sudan     | 1996 | 0.854869 | 0.853362 |
| Sudan     | 1997 | 0.848693 | 0.851978 |
| Sudan     | 1998 | 0.841506 | 0.849976 |
| Sudan     | 1999 | 0.8354   | 0.848705 |
| Sudan     | 2000 | 0.832796 | 0.850843 |

|    |          |      |          |          |
|----|----------|------|----------|----------|
| 1  |          |      |          |          |
| 2  |          |      |          |          |
| 3  |          |      |          |          |
| 4  |          |      |          |          |
| 5  | Sudan    | 2001 | 0.834451 | 0.85806  |
| 6  | Sudan    | 2002 | 0.832769 | 0.861836 |
| 7  | Sudan    | 2003 | 0.833939 | 0.869412 |
| 8  | Sudan    | 2004 | 0.839011 | 0.879915 |
| 9  | Sudan    | 2005 | 0.849835 | 0.89299  |
| 10 | Sudan    | 2006 | 0.838268 | 0.884609 |
| 11 | Sudan    | 2007 | 0.824546 | 0.874958 |
| 12 | Sudan    | 2008 | 0.810984 | 0.865859 |
| 13 | Sudan    | 2009 | 0.802669 | 0.861309 |
| 14 | Sudan    | 2010 | 0.796912 | 0.861204 |
| 15 | Sudan    | 2011 | 0.795754 | 0.865036 |
| 16 | Sudan    | 2012 | 0.79713  | 0.870054 |
| 17 | Sudan    | 2013 | 0.8      | 0.877201 |
| 18 | Sudan    | 2014 | 0.808748 | 0.88856  |
| 19 | Sudan    | 2015 | 0.816839 | 0.901218 |
| 20 | Sudan    | 2016 | 0.822954 | 0.911158 |
| 21 | Sudan    | 2017 | 0.829787 | 0.921163 |
| 22 | Sudan    | 2018 | 0.833647 | 0.928108 |
| 23 | Sudan    | 2019 | 0.836752 | 0.93243  |
| 24 | Suriname | 1990 | 0.787543 | 0.676472 |
| 25 | Suriname | 1991 | 0.773625 | 0.664525 |
| 26 | Suriname | 1992 | 0.762927 | 0.657532 |
| 27 | Suriname | 1993 | 0.735734 | 0.635602 |
| 28 | Suriname | 1994 | 0.730993 | 0.63073  |
| 29 | Suriname | 1995 | 0.749511 | 0.643204 |
| 30 |          |      |          |          |
| 31 |          |      |          |          |
| 32 |          |      |          |          |
| 33 |          |      |          |          |
| 34 |          |      |          |          |
| 35 |          |      |          |          |
| 36 |          |      |          |          |
| 37 |          |      |          |          |
| 38 |          |      |          |          |
| 39 |          |      |          |          |
| 40 |          |      |          |          |
| 41 |          |      |          |          |
| 42 |          |      |          |          |
| 43 |          |      |          |          |
| 44 |          |      |          |          |
| 45 |          |      |          |          |
| 46 |          |      |          |          |



|          |      |          |          |
|----------|------|----------|----------|
| Suriname | 1996 | 0.753184 | 0.648987 |
| Suriname | 1997 | 0.72162  | 0.620651 |
| Suriname | 1998 | 0.689955 | 0.59407  |
| Suriname | 1999 | 0.717914 | 0.623254 |
| Suriname | 2000 | 0.729871 | 0.626825 |
| Suriname | 2001 | 0.739779 | 0.625425 |
| Suriname | 2002 | 0.768182 | 0.652205 |
| Suriname | 2003 | 0.759013 | 0.647365 |
| Suriname | 2004 | 0.789716 | 0.673453 |
| Suriname | 2005 | 0.792861 | 0.669835 |
| Suriname | 2006 | 0.809596 | 0.685651 |
| Suriname | 2007 | 0.794531 | 0.673183 |
| Suriname | 2008 | 0.783635 | 0.659421 |
| Suriname | 2009 | 0.795851 | 0.66849  |
| Suriname | 2010 | 0.777593 | 0.653797 |
| Suriname | 2011 | 0.790986 | 0.667096 |
| Suriname | 2012 | 0.803316 | 0.677208 |
| Suriname | 2013 | 0.781261 | 0.653612 |
| Suriname | 2014 | 0.786669 | 0.651621 |
| Suriname | 2015 | 0.81729  | 0.675948 |
| Suriname | 2016 | 0.837001 | 0.69061  |
| Suriname | 2017 | 0.845809 | 0.696292 |
| Suriname | 2018 | 0.857382 | 0.703866 |
| Suriname | 2019 | 0.874242 | 0.715426 |
| Sweden   | 1990 | 0.754326 | 0.463779 |

|        |      |          |          |
|--------|------|----------|----------|
| Sweden | 1991 | 0.743543 | 0.454427 |
| Sweden | 1992 | 0.750763 | 0.455035 |
| Sweden | 1993 | 0.739427 | 0.445076 |
| Sweden | 1994 | 0.745978 | 0.44729  |
| Sweden | 1995 | 0.748424 | 0.448184 |
| Sweden | 1996 | 0.781246 | 0.465371 |
| Sweden | 1997 | 0.792434 | 0.470712 |
| Sweden | 1998 | 0.797746 | 0.471452 |
| Sweden | 1999 | 0.810983 | 0.477167 |
| Sweden | 2000 | 0.846597 | 0.497609 |
| Sweden | 2001 | 0.846216 | 0.497371 |
| Sweden | 2002 | 0.854622 | 0.502943 |
| Sweden | 2003 | 0.852701 | 0.503031 |
| Sweden | 2004 | 0.849916 | 0.501095 |
| Sweden | 2005 | 0.861536 | 0.509177 |
| Sweden | 2006 | 0.895253 | 0.529417 |
| Sweden | 2007 | 0.912485 | 0.538504 |
| Sweden | 2008 | 0.914439 | 0.542118 |
| Sweden | 2009 | 0.913988 | 0.54386  |
| Sweden | 2010 | 0.939152 | 0.560356 |
| Sweden | 2011 | 0.944867 | 0.567629 |
| Sweden | 2012 | 0.948257 | 0.574409 |
| Sweden | 2013 | 0.960872 | 0.587228 |
| Sweden | 2014 | 0.971413 | 0.598792 |
| Sweden | 2015 | 0.963536 | 0.59731  |

|             |      |          |          |
|-------------|------|----------|----------|
| Sweden      | 2016 | 0.968405 | 0.604055 |
| Sweden      | 2017 | 0.963346 | 0.608837 |
| Sweden      | 2018 | 0.949485 | 0.613392 |
| Sweden      | 2019 | 0.9058   | 0.598532 |
| Switzerland | 1990 | 1.062104 | 0.561863 |
| Switzerland | 1991 | 1.085297 | 0.574003 |
| Switzerland | 1992 | 1.118409 | 0.592365 |
| Switzerland | 1993 | 1.151731 | 0.609078 |
| Switzerland | 1994 | 1.192699 | 0.630941 |
| Switzerland | 1995 | 1.214237 | 0.642122 |
| Switzerland | 1996 | 1.241375 | 0.653118 |
| Switzerland | 1997 | 1.258971 | 0.662246 |
| Switzerland | 1998 | 1.265703 | 0.664328 |
| Switzerland | 1999 | 1.290294 | 0.675357 |
| Switzerland | 2000 | 1.342631 | 0.69972  |
| Switzerland | 2001 | 1.37058  | 0.709901 |
| Switzerland | 2002 | 1.38254  | 0.715449 |
| Switzerland | 2003 | 1.407761 | 0.727    |
| Switzerland | 2004 | 1.433706 | 0.740367 |
| Switzerland | 2005 | 1.469206 | 0.757813 |
| Switzerland | 2006 | 1.471483 | 0.759842 |
| Switzerland | 2007 | 1.473616 | 0.761116 |
| Switzerland | 2008 | 1.497778 | 0.778024 |
| Switzerland | 2009 | 1.497785 | 0.78351  |
| Switzerland | 2010 | 1.481958 | 0.781891 |

|                      |      |          |          |
|----------------------|------|----------|----------|
| Switzerland          | 2011 | 1.467667 | 0.77742  |
| Switzerland          | 2012 | 1.488953 | 0.789545 |
| Switzerland          | 2013 | 1.487406 | 0.790652 |
| Switzerland          | 2014 | 1.488658 | 0.792981 |
| Switzerland          | 2015 | 1.465689 | 0.780309 |
| Switzerland          | 2016 | 1.478698 | 0.796645 |
| Switzerland          | 2017 | 1.447048 | 0.795428 |
| Switzerland          | 2018 | 1.438361 | 0.801749 |
| Switzerland          | 2019 | 1.413788 | 0.800998 |
| Syrian Arab Republic | 1990 | 0.917479 | 1.018136 |
| Syrian Arab Republic | 1991 | 0.91471  | 1.035383 |
| Syrian Arab Republic | 1992 | 0.91309  | 1.052004 |
| Syrian Arab Republic | 1993 | 0.888644 | 1.046973 |
| Syrian Arab Republic | 1994 | 0.905732 | 1.091777 |
| Syrian Arab Republic | 1995 | 0.9339   | 1.155488 |
| Syrian Arab Republic | 1996 | 0.935203 | 1.179075 |
| Syrian Arab Republic | 1997 | 0.926363 | 1.188127 |
| Syrian Arab Republic | 1998 | 0.940655 | 1.218168 |
| Syrian Arab Republic | 1999 | 0.924891 | 1.217608 |
| Syrian Arab Republic | 2000 | 0.917348 | 1.226316 |
| Syrian Arab Republic | 2001 | 0.901886 | 1.202629 |
| Syrian Arab Republic | 2002 | 0.891482 | 1.176015 |
| Syrian Arab Republic | 2003 | 0.877832 | 1.168175 |
| Syrian Arab Republic | 2004 | 0.894141 | 1.205428 |
| Syrian Arab Republic | 2005 | 0.891503 | 1.221358 |

|    |                            |      |          |          |
|----|----------------------------|------|----------|----------|
| 1  |                            |      |          |          |
| 2  |                            |      |          |          |
| 3  |                            |      |          |          |
| 4  |                            |      |          |          |
| 5  | Syrian Arab Republic       | 2006 | 0.89491  | 1.244382 |
| 6  | Syrian Arab Republic       | 2007 | 0.875609 | 1.230146 |
| 7  | Syrian Arab Republic       | 2008 | 0.854031 | 1.180682 |
| 8  | Syrian Arab Republic       | 2009 | 0.870141 | 1.206509 |
| 9  | Syrian Arab Republic       | 2010 | 0.909359 | 1.261294 |
| 10 | Syrian Arab Republic       | 2011 | 0.9272   | 1.277259 |
| 11 | Syrian Arab Republic       | 2012 | 0.939035 | 1.265399 |
| 12 | Syrian Arab Republic       | 2013 | 0.958657 | 1.276741 |
| 13 | Syrian Arab Republic       | 2014 | 0.975687 | 1.28192  |
| 14 | Syrian Arab Republic       | 2015 | 0.986622 | 1.266201 |
| 15 | Syrian Arab Republic       | 2016 | 0.993034 | 1.255924 |
| 16 | Syrian Arab Republic       | 2017 | 0.998276 | 1.248525 |
| 17 | Syrian Arab Republic       | 2018 | 1.004023 | 1.245232 |
| 18 | Syrian Arab Republic       | 2019 | 1.005204 | 1.238992 |
| 19 | Taiwan (Province of China) | 1990 | 0.985425 | 1.011569 |
| 20 | Taiwan (Province of China) | 1991 | 0.995354 | 1.029026 |
| 21 | Taiwan (Province of China) | 1992 | 0.985887 | 1.02406  |
| 22 | Taiwan (Province of China) | 1993 | 0.989273 | 1.033343 |
| 23 | Taiwan (Province of China) | 1994 | 0.954842 | 1.005088 |
| 24 | Taiwan (Province of China) | 1995 | 0.961873 | 1.010782 |
| 25 | Taiwan (Province of China) | 1996 | 0.968368 | 1.020645 |
| 26 | Taiwan (Province of China) | 1997 | 0.964296 | 1.015286 |
| 27 | Taiwan (Province of China) | 1998 | 0.979169 | 1.027264 |
| 28 | Taiwan (Province of China) | 1999 | 1.002197 | 1.050918 |
| 29 | Taiwan (Province of China) | 2000 | 1.009383 | 1.056412 |
| 30 |                            |      |          |          |
| 31 |                            |      |          |          |
| 32 |                            |      |          |          |
| 33 |                            |      |          |          |
| 34 |                            |      |          |          |
| 35 |                            |      |          |          |
| 36 |                            |      |          |          |
| 37 |                            |      |          |          |
| 38 |                            |      |          |          |
| 39 |                            |      |          |          |
| 40 |                            |      |          |          |
| 41 |                            |      |          |          |
| 42 |                            |      |          |          |
| 43 |                            |      |          |          |
| 44 |                            |      |          |          |
| 45 |                            |      |          |          |
| 46 |                            |      |          |          |

|                            |      |          |          |
|----------------------------|------|----------|----------|
| Taiwan (Province of China) | 2001 | 1.009354 | 1.054034 |
| Taiwan (Province of China) | 2002 | 1.006938 | 1.043543 |
| Taiwan (Province of China) | 2003 | 1.017283 | 1.046037 |
| Taiwan (Province of China) | 2004 | 0.985298 | 1.009895 |
| Taiwan (Province of China) | 2005 | 0.980931 | 0.996768 |
| Taiwan (Province of China) | 2006 | 0.960976 | 0.966534 |
| Taiwan (Province of China) | 2007 | 0.981744 | 0.975252 |
| Taiwan (Province of China) | 2008 | 0.983518 | 0.965808 |
| Taiwan (Province of China) | 2009 | 0.999055 | 0.974124 |
| Taiwan (Province of China) | 2010 | 1.015987 | 0.975085 |
| Taiwan (Province of China) | 2011 | 0.98816  | 0.932321 |
| Taiwan (Province of China) | 2012 | 1.011285 | 0.935788 |
| Taiwan (Province of China) | 2013 | 1.014673 | 0.921141 |
| Taiwan (Province of China) | 2014 | 1.017774 | 0.913073 |
| Taiwan (Province of China) | 2015 | 1.017308 | 0.894752 |
| Taiwan (Province of China) | 2016 | 1.028637 | 0.885786 |
| Taiwan (Province of China) | 2017 | 1.049592 | 0.8845   |
| Taiwan (Province of China) | 2018 | 1.075771 | 0.889571 |
| Taiwan (Province of China) | 2019 | 1.085295 | 0.890293 |
| Tajikistan                 | 1990 | 1.073056 | 0.767723 |
| Tajikistan                 | 1991 | 1.087627 | 0.781103 |
| Tajikistan                 | 1992 | 1.074775 | 0.788456 |
| Tajikistan                 | 1993 | 1.104223 | 0.815629 |
| Tajikistan                 | 1994 | 1.111487 | 0.817704 |
| Tajikistan                 | 1995 | 1.082798 | 0.781517 |

|            |      |          |          |
|------------|------|----------|----------|
| Tajikistan | 1996 | 0.997321 | 0.703395 |
| Tajikistan | 1997 | 1.021929 | 0.708641 |
| Tajikistan | 1998 | 1.09509  | 0.757133 |
| Tajikistan | 1999 | 1.097986 | 0.769817 |
| Tajikistan | 2000 | 1.075764 | 0.773095 |
| Tajikistan | 2001 | 1.058164 | 0.766786 |
| Tajikistan | 2002 | 0.994554 | 0.740537 |
| Tajikistan | 2003 | 0.967197 | 0.738701 |
| Tajikistan | 2004 | 0.958714 | 0.745795 |
| Tajikistan | 2005 | 0.927086 | 0.725698 |
| Tajikistan | 2006 | 0.886752 | 0.692502 |
| Tajikistan | 2007 | 0.862094 | 0.673144 |
| Tajikistan | 2008 | 0.850079 | 0.661517 |
| Tajikistan | 2009 | 0.847407 | 0.659561 |
| Tajikistan | 2010 | 0.845459 | 0.657416 |
| Tajikistan | 2011 | 0.850017 | 0.665894 |
| Tajikistan | 2012 | 0.844328 | 0.666285 |
| Tajikistan | 2013 | 0.828206 | 0.64234  |
| Tajikistan | 2014 | 0.821117 | 0.634306 |
| Tajikistan | 2015 | 0.821088 | 0.630952 |
| Tajikistan | 2016 | 0.82218  | 0.628012 |
| Tajikistan | 2017 | 0.840047 | 0.6362   |
| Tajikistan | 2018 | 0.858145 | 0.653595 |
| Tajikistan | 2019 | 0.86892  | 0.663584 |
| Thailand   | 1990 | 0.681059 | 0.588169 |

|          |      |          |          |
|----------|------|----------|----------|
| Thailand | 1991 | 0.680018 | 0.593022 |
| Thailand | 1992 | 0.670693 | 0.590228 |
| Thailand | 1993 | 0.657486 | 0.586194 |
| Thailand | 1994 | 0.642782 | 0.582624 |
| Thailand | 1995 | 0.629929 | 0.578302 |
| Thailand | 1996 | 0.647371 | 0.596895 |
| Thailand | 1997 | 0.687893 | 0.630446 |
| Thailand | 1998 | 0.706685 | 0.61792  |
| Thailand | 1999 | 0.762966 | 0.658819 |
| Thailand | 2000 | 0.841298 | 0.719716 |
| Thailand | 2001 | 0.932113 | 0.799463 |
| Thailand | 2002 | 1.033857 | 0.882983 |
| Thailand | 2003 | 1.098239 | 0.934802 |
| Thailand | 2004 | 1.172291 | 0.993394 |
| Thailand | 2005 | 1.228727 | 1.038246 |
| Thailand | 2006 | 1.247513 | 1.050587 |
| Thailand | 2007 | 1.266169 | 1.065646 |
| Thailand | 2008 | 1.276799 | 1.071992 |
| Thailand | 2009 | 1.271683 | 1.063155 |
| Thailand | 2010 | 1.270152 | 1.059761 |
| Thailand | 2011 | 1.247955 | 1.040133 |
| Thailand | 2012 | 1.227875 | 1.01986  |
| Thailand | 2013 | 1.211694 | 1.00092  |
| Thailand | 2014 | 1.194524 | 0.980393 |
| Thailand | 2015 | 1.165776 | 0.949129 |



|    |             |      |          |          |
|----|-------------|------|----------|----------|
| 1  |             |      |          |          |
| 2  |             |      |          |          |
| 3  |             |      |          |          |
| 4  |             |      |          |          |
| 5  | Thailand    | 2016 | 1.156813 | 0.934726 |
| 6  | Thailand    | 2017 | 1.164108 | 0.932472 |
| 7  | Thailand    | 2018 | 1.183666 | 0.940038 |
| 8  | Thailand    | 2019 | 1.203826 | 0.949717 |
| 9  | Timor-Leste | 1990 | 1.196681 | 1.155464 |
| 10 | Timor-Leste | 1991 | 1.183547 | 1.14905  |
| 11 | Timor-Leste | 1992 | 1.181926 | 1.153336 |
| 12 | Timor-Leste | 1993 | 1.18303  | 1.159541 |
| 13 | Timor-Leste | 1994 | 1.182152 | 1.16208  |
| 14 | Timor-Leste | 1995 | 1.180636 | 1.156541 |
| 15 | Timor-Leste | 1996 | 1.170038 | 1.148286 |
| 16 | Timor-Leste | 1997 | 1.164627 | 1.146855 |
| 17 | Timor-Leste | 1998 | 1.154785 | 1.144469 |
| 18 | Timor-Leste | 1999 | 1.124982 | 1.120679 |
| 19 | Timor-Leste | 2000 | 1.09484  | 1.088144 |
| 20 | Timor-Leste | 2001 | 1.068454 | 1.065474 |
| 21 | Timor-Leste | 2002 | 1.044813 | 1.045044 |
| 22 | Timor-Leste | 2003 | 1.021296 | 1.023366 |
| 23 | Timor-Leste | 2004 | 1.004261 | 1.007189 |
| 24 | Timor-Leste | 2005 | 0.995047 | 0.99295  |
| 25 | Timor-Leste | 2006 | 0.983217 | 0.979306 |
| 26 | Timor-Leste | 2007 | 0.97809  | 0.972303 |
| 27 | Timor-Leste | 2008 | 0.972901 | 0.96515  |
| 28 | Timor-Leste | 2009 | 0.958798 | 0.950179 |
| 29 | Timor-Leste | 2010 | 0.946263 | 0.931787 |
| 30 |             |      |          |          |
| 31 |             |      |          |          |
| 32 |             |      |          |          |
| 33 |             |      |          |          |
| 34 |             |      |          |          |
| 35 |             |      |          |          |
| 36 |             |      |          |          |
| 37 |             |      |          |          |
| 38 |             |      |          |          |
| 39 |             |      |          |          |
| 40 |             |      |          |          |
| 41 |             |      |          |          |
| 42 |             |      |          |          |
| 43 |             |      |          |          |
| 44 |             |      |          |          |
| 45 |             |      |          |          |
| 46 |             |      |          |          |

|             |      |          |          |
|-------------|------|----------|----------|
| Timor-Leste | 2011 | 0.944849 | 0.929167 |
| Timor-Leste | 2012 | 0.937733 | 0.922057 |
| Timor-Leste | 2013 | 0.933499 | 0.917589 |
| Timor-Leste | 2014 | 0.93137  | 0.915053 |
| Timor-Leste | 2015 | 0.931167 | 0.907643 |
| Timor-Leste | 2016 | 0.928885 | 0.902893 |
| Timor-Leste | 2017 | 0.923472 | 0.896569 |
| Timor-Leste | 2018 | 0.919177 | 0.891868 |
| Timor-Leste | 2019 | 0.914942 | 0.887747 |
| Togo        | 1990 | 0.962346 | 0.830838 |
| Togo        | 1991 | 0.950342 | 0.818605 |
| Togo        | 1992 | 0.930765 | 0.801384 |
| Togo        | 1993 | 0.906439 | 0.7784   |
| Togo        | 1994 | 0.88443  | 0.755182 |
| Togo        | 1995 | 0.860386 | 0.73047  |
| Togo        | 1996 | 0.836479 | 0.708339 |
| Togo        | 1997 | 0.828206 | 0.695167 |
| Togo        | 1998 | 0.809561 | 0.674108 |
| Togo        | 1999 | 0.790023 | 0.656131 |
| Togo        | 2000 | 0.780961 | 0.645704 |
| Togo        | 2001 | 0.770827 | 0.6343   |
| Togo        | 2002 | 0.774135 | 0.631214 |
| Togo        | 2003 | 0.770561 | 0.623609 |
| Togo        | 2004 | 0.764903 | 0.614684 |
| Togo        | 2005 | 0.761828 | 0.607812 |

|         |      |          |          |
|---------|------|----------|----------|
| Togo    | 2006 | 0.761196 | 0.602424 |
| Togo    | 2007 | 0.771884 | 0.603577 |
| Togo    | 2008 | 0.773679 | 0.597014 |
| Togo    | 2009 | 0.777731 | 0.597059 |
| Togo    | 2010 | 0.780742 | 0.597078 |
| Togo    | 2011 | 0.791777 | 0.600911 |
| Togo    | 2012 | 0.807868 | 0.605235 |
| Togo    | 2013 | 0.817276 | 0.606995 |
| Togo    | 2014 | 0.824303 | 0.612965 |
| Togo    | 2015 | 0.831794 | 0.618577 |
| Togo    | 2016 | 0.842748 | 0.627372 |
| Togo    | 2017 | 0.857032 | 0.634987 |
| Togo    | 2018 | 0.871302 | 0.642024 |
| Togo    | 2019 | 0.880134 | 0.6488   |
| Tokelau | 1990 | 1.654136 | 1.365381 |
| Tokelau | 1991 | 1.642666 | 1.35864  |
| Tokelau | 1992 | 1.620669 | 1.35639  |
| Tokelau | 1993 | 1.593963 | 1.351673 |
| Tokelau | 1994 | 1.576672 | 1.351523 |
| Tokelau | 1995 | 1.567959 | 1.352706 |
| Tokelau | 1996 | 1.573466 | 1.356843 |
| Tokelau | 1997 | 1.591125 | 1.360109 |
| Tokelau | 1998 | 1.621783 | 1.361206 |
| Tokelau | 1999 | 1.651438 | 1.353628 |
| Tokelau | 2000 | 1.677927 | 1.343664 |

|         |      |          |          |
|---------|------|----------|----------|
| Tokelau | 2001 | 1.68679  | 1.32952  |
| Tokelau | 2002 | 1.678846 | 1.323954 |
| Tokelau | 2003 | 1.646445 | 1.313106 |
| Tokelau | 2004 | 1.619364 | 1.314728 |
| Tokelau | 2005 | 1.551954 | 1.285902 |
| Tokelau | 2006 | 1.493012 | 1.260807 |
| Tokelau | 2007 | 1.434987 | 1.228593 |
| Tokelau | 2008 | 1.397422 | 1.202485 |
| Tokelau | 2009 | 1.37992  | 1.185755 |
| Tokelau | 2010 | 1.373876 | 1.178019 |
| Tokelau | 2011 | 1.361942 | 1.171336 |
| Tokelau | 2012 | 1.345399 | 1.168842 |
| Tokelau | 2013 | 1.328842 | 1.169288 |
| Tokelau | 2014 | 1.305957 | 1.165686 |
| Tokelau | 2015 | 1.28582  | 1.16589  |
| Tokelau | 2016 | 1.265894 | 1.168574 |
| Tokelau | 2017 | 1.255581 | 1.18055  |
| Tokelau | 2018 | 1.248531 | 1.189306 |
| Tokelau | 2019 | 1.245695 | 1.197551 |
| Tonga   | 1990 | 1.137947 | 0.954422 |
| Tonga   | 1991 | 1.150946 | 0.963223 |
| Tonga   | 1992 | 1.153805 | 0.956807 |
| Tonga   | 1993 | 1.175571 | 0.972467 |
| Tonga   | 1994 | 1.198633 | 0.991896 |
| Tonga   | 1995 | 1.222674 | 1.012158 |

1  
2  
3  
4  
5  
6  
7  
8  
9  
10  
11  
12  
13  
14  
15  
16  
17  
18  
19  
20  
21  
22  
23  
24  
25  
26  
27  
28  
29  
30  
31  
32  
33  
34  
35  
36  
37  
38  
39  
40  
41  
42  
43  
44  
45  
46

|                     |      |          |          |
|---------------------|------|----------|----------|
| Tonga               | 1996 | 1.214661 | 1.004611 |
| Tonga               | 1997 | 1.215995 | 1.005481 |
| Tonga               | 1998 | 1.184864 | 0.982384 |
| Tonga               | 1999 | 1.116171 | 0.924504 |
| Tonga               | 2000 | 1.092365 | 0.89794  |
| Tonga               | 2001 | 1.072194 | 0.876573 |
| Tonga               | 2002 | 1.025257 | 0.834568 |
| Tonga               | 2003 | 0.987728 | 0.798999 |
| Tonga               | 2004 | 0.996284 | 0.801134 |
| Tonga               | 2005 | 1.010378 | 0.812375 |
| Tonga               | 2006 | 0.959076 | 0.770036 |
| Tonga               | 2007 | 0.91288  | 0.731886 |
| Tonga               | 2008 | 0.87431  | 0.699518 |
| Tonga               | 2009 | 0.844102 | 0.673292 |
| Tonga               | 2010 | 0.824036 | 0.655058 |
| Tonga               | 2011 | 0.811065 | 0.642886 |
| Tonga               | 2012 | 0.803065 | 0.634647 |
| Tonga               | 2013 | 0.79368  | 0.625524 |
| Tonga               | 2014 | 0.789094 | 0.620129 |
| Tonga               | 2015 | 0.790241 | 0.619271 |
| Tonga               | 2016 | 0.79346  | 0.620084 |
| Tonga               | 2017 | 0.803721 | 0.626275 |
| Tonga               | 2018 | 0.811761 | 0.630899 |
| Tonga               | 2019 | 0.819439 | 0.635363 |
| Trinidad and Tobago | 1990 | 0.600964 | 0.489801 |

|                     |      |          |          |
|---------------------|------|----------|----------|
| Trinidad and Tobago | 1991 | 0.627662 | 0.515626 |
| Trinidad and Tobago | 1992 | 0.606567 | 0.504513 |
| Trinidad and Tobago | 1993 | 0.64273  | 0.535968 |
| Trinidad and Tobago | 1994 | 0.643704 | 0.538284 |
| Trinidad and Tobago | 1995 | 0.699835 | 0.588405 |
| Trinidad and Tobago | 1996 | 0.630826 | 0.534858 |
| Trinidad and Tobago | 1997 | 0.670581 | 0.56774  |
| Trinidad and Tobago | 1998 | 0.668419 | 0.570753 |
| Trinidad and Tobago | 1999 | 0.693004 | 0.596655 |
| Trinidad and Tobago | 2000 | 0.721773 | 0.621557 |
| Trinidad and Tobago | 2001 | 0.707633 | 0.612719 |
| Trinidad and Tobago | 2002 | 0.708067 | 0.617553 |
| Trinidad and Tobago | 2003 | 0.702159 | 0.617369 |
| Trinidad and Tobago | 2004 | 0.719421 | 0.631428 |
| Trinidad and Tobago | 2005 | 0.697426 | 0.612803 |
| Trinidad and Tobago | 2006 | 0.752942 | 0.660694 |
| Trinidad and Tobago | 2007 | 0.769876 | 0.675302 |
| Trinidad and Tobago | 2008 | 0.726015 | 0.637953 |
| Trinidad and Tobago | 2009 | 0.751312 | 0.6574   |
| Trinidad and Tobago | 2010 | 0.747563 | 0.654669 |
| Trinidad and Tobago | 2011 | 0.748961 | 0.657407 |
| Trinidad and Tobago | 2012 | 0.758825 | 0.666719 |
| Trinidad and Tobago | 2013 | 0.75465  | 0.661016 |
| Trinidad and Tobago | 2014 | 0.74257  | 0.650544 |
| Trinidad and Tobago | 2015 | 0.728443 | 0.637884 |

|                     |      |          |          |
|---------------------|------|----------|----------|
| Trinidad and Tobago | 2016 | 0.714285 | 0.622822 |
| Trinidad and Tobago | 2017 | 0.708588 | 0.617215 |
| Trinidad and Tobago | 2018 | 0.705777 | 0.614191 |
| Trinidad and Tobago | 2019 | 0.700642 | 0.609275 |
| Tunisia             | 1990 | 0.922362 | 0.92216  |
| Tunisia             | 1991 | 0.91466  | 0.908992 |
| Tunisia             | 1992 | 0.909486 | 0.907232 |
| Tunisia             | 1993 | 0.893286 | 0.890379 |
| Tunisia             | 1994 | 0.889422 | 0.885243 |
| Tunisia             | 1995 | 0.915137 | 0.907174 |
| Tunisia             | 1996 | 0.915833 | 0.904284 |
| Tunisia             | 1997 | 0.911858 | 0.905111 |
| Tunisia             | 1998 | 0.906945 | 0.898084 |
| Tunisia             | 1999 | 0.902886 | 0.889968 |
| Tunisia             | 2000 | 0.895207 | 0.874845 |
| Tunisia             | 2001 | 0.896714 | 0.870498 |
| Tunisia             | 2002 | 0.901627 | 0.869276 |
| Tunisia             | 2003 | 0.896903 | 0.853638 |
| Tunisia             | 2004 | 0.907776 | 0.856652 |
| Tunisia             | 2005 | 0.920709 | 0.861737 |
| Tunisia             | 2006 | 0.929556 | 0.86298  |
| Tunisia             | 2007 | 0.942838 | 0.870231 |
| Tunisia             | 2008 | 0.955568 | 0.877671 |
| Tunisia             | 2009 | 0.960409 | 0.877045 |
| Tunisia             | 2010 | 0.968509 | 0.879379 |

|         |      |          |          |
|---------|------|----------|----------|
| Tunisia | 2011 | 0.982912 | 0.888732 |
| Tunisia | 2012 | 0.990537 | 0.890952 |
| Tunisia | 2013 | 1.002731 | 0.897425 |
| Tunisia | 2014 | 1.014181 | 0.903306 |
| Tunisia | 2015 | 1.026315 | 0.91006  |
| Tunisia | 2016 | 1.03649  | 0.914533 |
| Tunisia | 2017 | 1.04578  | 0.918231 |
| Tunisia | 2018 | 1.05692  | 0.925188 |
| Tunisia | 2019 | 1.070279 | 0.935564 |
| Turkey  | 1990 | 0.882338 | 0.747628 |
| Turkey  | 1991 | 0.923351 | 0.791123 |
| Turkey  | 1992 | 0.923977 | 0.795548 |
| Turkey  | 1993 | 0.926172 | 0.800107 |
| Turkey  | 1994 | 0.950114 | 0.827933 |
| Turkey  | 1995 | 0.9474   | 0.825339 |
| Turkey  | 1996 | 0.922129 | 0.799142 |
| Turkey  | 1997 | 0.877222 | 0.74673  |
| Turkey  | 1998 | 0.865027 | 0.727694 |
| Turkey  | 1999 | 0.904444 | 0.768061 |
| Turkey  | 2000 | 0.915587 | 0.780539 |
| Turkey  | 2001 | 0.842519 | 0.690307 |
| Turkey  | 2002 | 0.776753 | 0.607787 |
| Turkey  | 2003 | 0.77808  | 0.597431 |
| Turkey  | 2004 | 0.785448 | 0.592462 |
| Turkey  | 2005 | 0.826471 | 0.620965 |



|              |      |          |          |
|--------------|------|----------|----------|
| Turkey       | 2006 | 0.899691 | 0.676278 |
| Turkey       | 2007 | 0.989343 | 0.75242  |
| Turkey       | 2008 | 1.072288 | 0.831128 |
| Turkey       | 2009 | 1.07198  | 0.851161 |
| Turkey       | 2010 | 1.058503 | 0.849826 |
| Turkey       | 2011 | 1.045949 | 0.845235 |
| Turkey       | 2012 | 1.043623 | 0.847286 |
| Turkey       | 2013 | 1.048438 | 0.855723 |
| Turkey       | 2014 | 1.041235 | 0.848401 |
| Turkey       | 2015 | 1.054692 | 0.857405 |
| Turkey       | 2016 | 1.081499 | 0.880422 |
| Turkey       | 2017 | 1.101105 | 0.900345 |
| Turkey       | 2018 | 1.116604 | 0.915779 |
| Turkey       | 2019 | 1.122    | 0.920632 |
| Turkmenistan | 1990 | 1.024385 | 0.767814 |
| Turkmenistan | 1991 | 1.045253 | 0.777121 |
| Turkmenistan | 1992 | 1.073674 | 0.808289 |
| Turkmenistan | 1993 | 1.021469 | 0.770932 |
| Turkmenistan | 1994 | 0.985844 | 0.746882 |
| Turkmenistan | 1995 | 0.97205  | 0.741217 |
| Turkmenistan | 1996 | 0.92706  | 0.713066 |
| Turkmenistan | 1997 | 0.900121 | 0.699398 |
| Turkmenistan | 1998 | 0.849848 | 0.6639   |
| Turkmenistan | 1999 | 0.840053 | 0.656002 |
| Turkmenistan | 2000 | 0.836794 | 0.655332 |

|              |      |          |          |
|--------------|------|----------|----------|
| Turkmenistan | 2001 | 0.85116  | 0.669704 |
| Turkmenistan | 2002 | 0.841139 | 0.66648  |
| Turkmenistan | 2003 | 0.803498 | 0.640381 |
| Turkmenistan | 2004 | 0.779975 | 0.625078 |
| Turkmenistan | 2005 | 0.77615  | 0.626214 |
| Turkmenistan | 2006 | 0.78764  | 0.638138 |
| Turkmenistan | 2007 | 0.762627 | 0.622647 |
| Turkmenistan | 2008 | 0.768426 | 0.627439 |
| Turkmenistan | 2009 | 0.78346  | 0.63939  |
| Turkmenistan | 2010 | 0.784212 | 0.642602 |
| Turkmenistan | 2011 | 0.800166 | 0.659001 |
| Turkmenistan | 2012 | 0.804281 | 0.665747 |
| Turkmenistan | 2013 | 0.75502  | 0.629872 |
| Turkmenistan | 2014 | 0.730527 | 0.612734 |
| Turkmenistan | 2015 | 0.700143 | 0.590465 |
| Turkmenistan | 2016 | 0.706254 | 0.596266 |
| Turkmenistan | 2017 | 0.704075 | 0.595532 |
| Turkmenistan | 2018 | 0.696381 | 0.58806  |
| Turkmenistan | 2019 | 0.694862 | 0.587712 |
| Tuvalu       | 1990 | 1.28414  | 0.882899 |
| Tuvalu       | 1991 | 1.271231 | 0.881089 |
| Tuvalu       | 1992 | 1.266315 | 0.883443 |
| Tuvalu       | 1993 | 1.277371 | 0.895488 |
| Tuvalu       | 1994 | 1.270392 | 0.895911 |
| Tuvalu       | 1995 | 1.282723 | 0.910113 |

1  
2  
3  
4  
5  
6  
7  
8  
9  
10  
11  
12  
13  
14  
15  
16  
17  
18  
19  
20  
21  
22  
23  
24  
25  
26  
27  
28  
29  
30  
31  
32  
33  
34  
35  
36  
37  
38  
39  
40  
41  
42  
43  
44  
45  
46

|        |      |          |          |
|--------|------|----------|----------|
| Tuvalu | 1996 | 1.28478  | 0.918413 |
| Tuvalu | 1997 | 1.283959 | 0.924284 |
| Tuvalu | 1998 | 1.26629  | 0.918439 |
| Tuvalu | 1999 | 1.265058 | 0.923673 |
| Tuvalu | 2000 | 1.27034  | 0.933788 |
| Tuvalu | 2001 | 1.248973 | 0.927207 |
| Tuvalu | 2002 | 1.230434 | 0.923587 |
| Tuvalu | 2003 | 1.209399 | 0.917821 |
| Tuvalu | 2004 | 1.19759  | 0.918897 |
| Tuvalu | 2005 | 1.160623 | 0.900505 |
| Tuvalu | 2006 | 1.128669 | 0.885957 |
| Tuvalu | 2007 | 1.088976 | 0.86284  |
| Tuvalu | 2008 | 1.055329 | 0.843309 |
| Tuvalu | 2009 | 1.029277 | 0.829027 |
| Tuvalu | 2010 | 1.0103   | 0.819353 |
| Tuvalu | 2011 | 0.990434 | 0.809332 |
| Tuvalu | 2012 | 0.972895 | 0.800738 |
| Tuvalu | 2013 | 0.958254 | 0.793897 |
| Tuvalu | 2014 | 0.943162 | 0.785966 |
| Tuvalu | 2015 | 0.932401 | 0.780965 |
| Tuvalu | 2016 | 0.922036 | 0.777291 |
| Tuvalu | 2017 | 0.917452 | 0.777446 |
| Tuvalu | 2018 | 0.911409 | 0.776202 |
| Tuvalu | 2019 | 0.904083 | 0.774402 |
| Uganda | 1990 | 0.548236 | 0.504404 |

|        |      |          |          |
|--------|------|----------|----------|
| Uganda | 1991 | 0.54013  | 0.490464 |
| Uganda | 1992 | 0.536199 | 0.480626 |
| Uganda | 1993 | 0.535278 | 0.47393  |
| Uganda | 1994 | 0.53796  | 0.471558 |
| Uganda | 1995 | 0.539955 | 0.468542 |
| Uganda | 1996 | 0.54526  | 0.469057 |
| Uganda | 1997 | 0.557288 | 0.474044 |
| Uganda | 1998 | 0.574814 | 0.482678 |
| Uganda | 1999 | 0.592851 | 0.492126 |
| Uganda | 2000 | 0.61163  | 0.502468 |
| Uganda | 2001 | 0.625378 | 0.50938  |
| Uganda | 2002 | 0.635621 | 0.514315 |
| Uganda | 2003 | 0.640481 | 0.516736 |
| Uganda | 2004 | 0.646589 | 0.518975 |
| Uganda | 2005 | 0.650511 | 0.520499 |
| Uganda | 2006 | 0.647978 | 0.517671 |
| Uganda | 2007 | 0.639278 | 0.511191 |
| Uganda | 2008 | 0.630149 | 0.504185 |
| Uganda | 2009 | 0.628857 | 0.503771 |
| Uganda | 2010 | 0.634139 | 0.506062 |
| Uganda | 2011 | 0.637465 | 0.508293 |
| Uganda | 2012 | 0.645277 | 0.514361 |
| Uganda | 2013 | 0.659301 | 0.522239 |
| Uganda | 2014 | 0.668866 | 0.527592 |
| Uganda | 2015 | 0.675581 | 0.531943 |

1  
2  
3  
4  
5  
6  
7  
8  
9  
10  
11  
12  
13  
14  
15  
16  
17  
18  
19  
20  
21  
22  
23  
24  
25  
26  
27  
28  
29  
30  
31  
32  
33  
34  
35  
36  
37  
38  
39  
40  
41  
42  
43  
44  
45  
46

|         |      |          |          |
|---------|------|----------|----------|
| Uganda  | 2016 | 0.680967 | 0.534655 |
| Uganda  | 2017 | 0.68842  | 0.542143 |
| Uganda  | 2018 | 0.697821 | 0.550123 |
| Uganda  | 2019 | 0.70498  | 0.556486 |
| Ukraine | 1990 | 1.26884  | 0.535379 |
| Ukraine | 1991 | 1.265186 | 0.53084  |
| Ukraine | 1992 | 1.259455 | 0.527745 |
| Ukraine | 1993 | 1.283322 | 0.535352 |
| Ukraine | 1994 | 1.266652 | 0.530396 |
| Ukraine | 1995 | 1.223648 | 0.518507 |
| Ukraine | 1996 | 1.228618 | 0.517985 |
| Ukraine | 1997 | 1.257429 | 0.526083 |
| Ukraine | 1998 | 1.284121 | 0.532463 |
| Ukraine | 1999 | 1.261957 | 0.528379 |
| Ukraine | 2000 | 1.222739 | 0.518315 |
| Ukraine | 2001 | 1.218068 | 0.524698 |
| Ukraine | 2002 | 1.187573 | 0.52938  |
| Ukraine | 2003 | 1.17885  | 0.542352 |
| Ukraine | 2004 | 1.125673 | 0.539554 |
| Ukraine | 2005 | 1.059571 | 0.529521 |
| Ukraine | 2006 | 1.058946 | 0.534629 |
| Ukraine | 2007 | 1.027918 | 0.531838 |
| Ukraine | 2008 | 1.014702 | 0.529647 |
| Ukraine | 2009 | 1.082432 | 0.551625 |
| Ukraine | 2010 | 1.100984 | 0.556521 |

|                      |      |          |          |
|----------------------|------|----------|----------|
| Ukraine              | 2011 | 1.11073  | 0.562062 |
| Ukraine              | 2012 | 1.116488 | 0.569273 |
| Ukraine              | 2013 | 1.124589 | 0.579758 |
| Ukraine              | 2014 | 1.152312 | 0.594726 |
| Ukraine              | 2015 | 1.004352 | 0.550619 |
| Ukraine              | 2016 | 1.038161 | 0.568166 |
| Ukraine              | 2017 | 1.040673 | 0.563753 |
| Ukraine              | 2018 | 1.031214 | 0.550653 |
| Ukraine              | 2019 | 1.034153 | 0.548031 |
| United Arab Emirates | 1990 | 0.508775 | 1.055819 |
| United Arab Emirates | 1991 | 0.503032 | 1.069792 |
| United Arab Emirates | 1992 | 0.488118 | 1.067824 |
| United Arab Emirates | 1993 | 0.474784 | 1.069098 |
| United Arab Emirates | 1994 | 0.469924 | 1.103837 |
| United Arab Emirates | 1995 | 0.458375 | 1.106888 |
| United Arab Emirates | 1996 | 0.453324 | 1.114917 |
| United Arab Emirates | 1997 | 0.449076 | 1.143774 |
| United Arab Emirates | 1998 | 0.443761 | 1.145591 |
| United Arab Emirates | 1999 | 0.438082 | 1.140382 |
| United Arab Emirates | 2000 | 0.423761 | 1.063493 |
| United Arab Emirates | 2001 | 0.423709 | 1.065669 |
| United Arab Emirates | 2002 | 0.421871 | 1.066846 |
| United Arab Emirates | 2003 | 0.469095 | 1.226409 |
| United Arab Emirates | 2004 | 0.51104  | 1.461019 |
| United Arab Emirates | 2005 | 0.502397 | 1.530846 |

1  
2  
3  
4  
5  
6  
7  
8  
9  
10  
11  
12  
13  
14  
15  
16  
17  
18  
19  
20  
21  
22  
23  
24  
25  
26  
27  
28  
29  
30  
31  
32  
33  
34  
35  
36  
37  
38  
39  
40  
41  
42  
43  
44  
45  
46

|                      |      |          |          |
|----------------------|------|----------|----------|
| United Arab Emirates | 2006 | 0.484336 | 1.642268 |
| United Arab Emirates | 2007 | 0.455707 | 1.872718 |
| United Arab Emirates | 2008 | 0.414353 | 1.915966 |
| United Arab Emirates | 2009 | 0.386944 | 1.959882 |
| United Arab Emirates | 2010 | 0.377203 | 1.975313 |
| United Arab Emirates | 2011 | 0.372044 | 2.007443 |
| United Arab Emirates | 2012 | 0.369703 | 2.035482 |
| United Arab Emirates | 2013 | 0.353789 | 1.824708 |
| United Arab Emirates | 2014 | 0.302003 | 1.068639 |
| United Arab Emirates | 2015 | 0.308823 | 1.083892 |
| United Arab Emirates | 2016 | 0.313736 | 1.095106 |
| United Arab Emirates | 2017 | 0.317355 | 1.102036 |
| United Arab Emirates | 2018 | 0.322685 | 1.113433 |
| United Arab Emirates | 2019 | 0.328024 | 1.123091 |
| United Kingdom       | 1990 | 1.193318 | 0.623683 |
| United Kingdom       | 1991 | 1.185042 | 0.617732 |
| United Kingdom       | 1992 | 1.191903 | 0.620316 |
| United Kingdom       | 1993 | 1.18015  | 0.616627 |
| United Kingdom       | 1994 | 1.184645 | 0.623098 |
| United Kingdom       | 1995 | 1.165368 | 0.618961 |
| United Kingdom       | 1996 | 1.162815 | 0.622685 |
| United Kingdom       | 1997 | 1.162376 | 0.626324 |
| United Kingdom       | 1998 | 1.151615 | 0.626223 |
| United Kingdom       | 1999 | 1.132918 | 0.618551 |
| United Kingdom       | 2000 | 1.133772 | 0.621896 |

|                             |      |          |          |
|-----------------------------|------|----------|----------|
| United Kingdom              | 2001 | 1.125533 | 0.620902 |
| United Kingdom              | 2002 | 1.116016 | 0.619005 |
| United Kingdom              | 2003 | 1.130571 | 0.631655 |
| United Kingdom              | 2004 | 1.141036 | 0.64618  |
| United Kingdom              | 2005 | 1.149652 | 0.659761 |
| United Kingdom              | 2006 | 1.140951 | 0.661428 |
| United Kingdom              | 2007 | 1.151446 | 0.673374 |
| United Kingdom              | 2008 | 1.158662 | 0.683882 |
| United Kingdom              | 2009 | 1.170397 | 0.694055 |
| United Kingdom              | 2010 | 1.196585 | 0.709307 |
| United Kingdom              | 2011 | 1.225876 | 0.723568 |
| United Kingdom              | 2012 | 1.252109 | 0.736999 |
| United Kingdom              | 2013 | 1.261349 | 0.746707 |
| United Kingdom              | 2014 | 1.272174 | 0.763126 |
| United Kingdom              | 2015 | 1.2565   | 0.769459 |
| United Kingdom              | 2016 | 1.240504 | 0.775236 |
| United Kingdom              | 2017 | 1.21352  | 0.77185  |
| United Kingdom              | 2018 | 1.186146 | 0.766796 |
| United Kingdom              | 2019 | 1.164712 | 0.764333 |
| United Republic of Tanzania | 1990 | 0.781522 | 0.703391 |
| United Republic of Tanzania | 1991 | 0.770668 | 0.692076 |
| United Republic of Tanzania | 1992 | 0.762312 | 0.682524 |
| United Republic of Tanzania | 1993 | 0.757432 | 0.675606 |
| United Republic of Tanzania | 1994 | 0.754777 | 0.669585 |
| United Republic of Tanzania | 1995 | 0.754556 | 0.665336 |



1  
2  
3  
4  
5  
6  
7  
8  
9  
10  
11  
12  
13  
14  
15  
16  
17  
18  
19  
20  
21  
22  
23  
24  
25  
26  
27  
28  
29  
30  
31  
32  
33  
34  
35  
36  
37  
38  
39  
40  
41  
42  
43  
44  
45  
46

|                             |      |          |          |
|-----------------------------|------|----------|----------|
| United Republic of Tanzania | 1996 | 0.753179 | 0.660656 |
| United Republic of Tanzania | 1997 | 0.755772 | 0.65939  |
| United Republic of Tanzania | 1998 | 0.762045 | 0.661406 |
| United Republic of Tanzania | 1999 | 0.758868 | 0.656168 |
| United Republic of Tanzania | 2000 | 0.75477  | 0.650069 |
| United Republic of Tanzania | 2001 | 0.761333 | 0.652433 |
| United Republic of Tanzania | 2002 | 0.775263 | 0.660039 |
| United Republic of Tanzania | 2003 | 0.799231 | 0.675537 |
| United Republic of Tanzania | 2004 | 0.817084 | 0.687831 |
| United Republic of Tanzania | 2005 | 0.833331 | 0.699574 |
| United Republic of Tanzania | 2006 | 0.849816 | 0.70961  |
| United Republic of Tanzania | 2007 | 0.863137 | 0.718822 |
| United Republic of Tanzania | 2008 | 0.871853 | 0.726302 |
| United Republic of Tanzania | 2009 | 0.88892  | 0.738823 |
| United Republic of Tanzania | 2010 | 0.911233 | 0.758888 |
| United Republic of Tanzania | 2011 | 0.934464 | 0.780506 |
| United Republic of Tanzania | 2012 | 0.944435 | 0.790545 |
| United Republic of Tanzania | 2013 | 0.95813  | 0.803793 |
| United Republic of Tanzania | 2014 | 0.961943 | 0.812238 |
| United Republic of Tanzania | 2015 | 0.967976 | 0.817986 |
| United Republic of Tanzania | 2016 | 0.970737 | 0.825863 |
| United Republic of Tanzania | 2017 | 0.976471 | 0.836559 |
| United Republic of Tanzania | 2018 | 0.97822  | 0.842363 |
| United Republic of Tanzania | 2019 | 0.979223 | 0.848354 |
| United States of America    | 1990 | 1.121959 | 0.673713 |

|                          |      |          |          |
|--------------------------|------|----------|----------|
| United States of America | 1991 | 1.121152 | 0.673792 |
| United States of America | 1992 | 1.118823 | 0.672728 |
| United States of America | 1993 | 1.117914 | 0.672485 |
| United States of America | 1994 | 1.127135 | 0.678043 |
| United States of America | 1995 | 1.130951 | 0.681682 |
| United States of America | 1996 | 1.147801 | 0.692919 |
| United States of America | 1997 | 1.160897 | 0.703666 |
| United States of America | 1998 | 1.167934 | 0.711278 |
| United States of America | 1999 | 1.175995 | 0.721325 |
| United States of America | 2000 | 1.185469 | 0.731829 |
| United States of America | 2001 | 1.184596 | 0.736947 |
| United States of America | 2002 | 1.166022 | 0.730166 |
| United States of America | 2003 | 1.156228 | 0.729609 |
| United States of America | 2004 | 1.162079 | 0.737919 |
| United States of America | 2005 | 1.161446 | 0.741989 |
| United States of America | 2006 | 1.170441 | 0.752624 |
| United States of America | 2007 | 1.176848 | 0.761583 |
| United States of America | 2008 | 1.157902 | 0.754912 |
| United States of America | 2009 | 1.137414 | 0.747998 |
| United States of America | 2010 | 1.112516 | 0.737069 |
| United States of America | 2011 | 1.100105 | 0.735527 |
| United States of America | 2012 | 1.079197 | 0.728297 |
| United States of America | 2013 | 1.052712 | 0.717797 |
| United States of America | 2014 | 1.045775 | 0.71982  |
| United States of America | 2015 | 1.036761 | 0.720233 |

1  
2  
3  
4  
5  
6  
7  
8  
9  
10  
11  
12  
13  
14  
15  
16  
17  
18  
19  
20  
21  
22  
23  
24  
25  
26  
27  
28  
29  
30  
31  
32  
33  
34  
35  
36  
37  
38  
39  
40  
41  
42  
43  
44  
45  
46

|                              |      |          |          |
|------------------------------|------|----------|----------|
| United States of America     | 2016 | 1.018288 | 0.714376 |
| United States of America     | 2017 | 0.997852 | 0.705882 |
| United States of America     | 2018 | 0.970738 | 0.689814 |
| United States of America     | 2019 | 0.99178  | 0.704414 |
| United States Virgin Islands | 1990 | 0.873088 | 0.721712 |
| United States Virgin Islands | 1991 | 0.874237 | 0.725185 |
| United States Virgin Islands | 1992 | 0.870862 | 0.721844 |
| United States Virgin Islands | 1993 | 0.870139 | 0.720392 |
| United States Virgin Islands | 1994 | 0.875963 | 0.723101 |
| United States Virgin Islands | 1995 | 0.910227 | 0.749649 |
| United States Virgin Islands | 1996 | 0.91449  | 0.749982 |
| United States Virgin Islands | 1997 | 0.925431 | 0.756183 |
| United States Virgin Islands | 1998 | 0.934782 | 0.760012 |
| United States Virgin Islands | 1999 | 0.930633 | 0.751762 |
| United States Virgin Islands | 2000 | 0.956607 | 0.762725 |
| United States Virgin Islands | 2001 | 0.955895 | 0.760227 |
| United States Virgin Islands | 2002 | 0.959703 | 0.761204 |
| United States Virgin Islands | 2003 | 0.960362 | 0.761988 |
| United States Virgin Islands | 2004 | 0.96685  | 0.766782 |
| United States Virgin Islands | 2005 | 0.964826 | 0.766372 |
| United States Virgin Islands | 2006 | 0.926507 | 0.744328 |
| United States Virgin Islands | 2007 | 0.733662 | 0.621569 |
| United States Virgin Islands | 2008 | 0.734813 | 0.619853 |
| United States Virgin Islands | 2009 | 0.740848 | 0.622809 |
| United States Virgin Islands | 2010 | 0.746643 | 0.624255 |

|                              |      |          |          |
|------------------------------|------|----------|----------|
| United States Virgin Islands | 2011 | 0.748312 | 0.62212  |
| United States Virgin Islands | 2012 | 0.74953  | 0.619269 |
| United States Virgin Islands | 2013 | 0.748915 | 0.614179 |
| United States Virgin Islands | 2014 | 0.746855 | 0.60744  |
| United States Virgin Islands | 2015 | 0.742282 | 0.598189 |
| United States Virgin Islands | 2016 | 0.742383 | 0.591309 |
| United States Virgin Islands | 2017 | 0.750479 | 0.590251 |
| United States Virgin Islands | 2018 | 0.761021 | 0.590597 |
| United States Virgin Islands | 2019 | 0.771097 | 0.590125 |
| Uruguay                      | 1990 | 0.787892 | 0.531212 |
| Uruguay                      | 1991 | 0.815435 | 0.545513 |
| Uruguay                      | 1992 | 0.792603 | 0.529812 |
| Uruguay                      | 1993 | 0.792372 | 0.527085 |
| Uruguay                      | 1994 | 0.782112 | 0.517604 |
| Uruguay                      | 1995 | 0.776781 | 0.509406 |
| Uruguay                      | 1996 | 0.77837  | 0.508201 |
| Uruguay                      | 1997 | 0.800527 | 0.519526 |
| Uruguay                      | 1998 | 0.786886 | 0.508517 |
| Uruguay                      | 1999 | 0.810708 | 0.520204 |
| Uruguay                      | 2000 | 0.821543 | 0.525213 |
| Uruguay                      | 2001 | 0.846287 | 0.538567 |
| Uruguay                      | 2002 | 0.836056 | 0.528477 |
| Uruguay                      | 2003 | 0.864479 | 0.540434 |
| Uruguay                      | 2004 | 0.894154 | 0.553194 |
| Uruguay                      | 2005 | 0.908873 | 0.560506 |

|            |      |          |          |
|------------|------|----------|----------|
| Uruguay    | 2006 | 0.913924 | 0.560684 |
| Uruguay    | 2007 | 0.904512 | 0.551885 |
| Uruguay    | 2008 | 0.924715 | 0.562482 |
| Uruguay    | 2009 | 0.912966 | 0.55148  |
| Uruguay    | 2010 | 0.93959  | 0.561935 |
| Uruguay    | 2011 | 0.962523 | 0.566127 |
| Uruguay    | 2012 | 0.976484 | 0.571097 |
| Uruguay    | 2013 | 0.988945 | 0.57691  |
| Uruguay    | 2014 | 0.996598 | 0.579124 |
| Uruguay    | 2015 | 1.013463 | 0.586803 |
| Uruguay    | 2016 | 1.039523 | 0.59868  |
| Uruguay    | 2017 | 1.031497 | 0.593876 |
| Uruguay    | 2018 | 1.024607 | 0.589103 |
| Uruguay    | 2019 | 1.020814 | 0.586969 |
| Uzbekistan | 1990 | 1.053712 | 0.850642 |
| Uzbekistan | 1991 | 1.058001 | 0.854141 |
| Uzbekistan | 1992 | 1.078785 | 0.8679   |
| Uzbekistan | 1993 | 1.066371 | 0.853702 |
| Uzbekistan | 1994 | 1.030576 | 0.826133 |
| Uzbekistan | 1995 | 0.981071 | 0.793016 |
| Uzbekistan | 1996 | 0.943412 | 0.769216 |
| Uzbekistan | 1997 | 0.952693 | 0.779594 |
| Uzbekistan | 1998 | 0.966792 | 0.790835 |
| Uzbekistan | 1999 | 0.943803 | 0.773295 |
| Uzbekistan | 2000 | 0.917629 | 0.749618 |

|            |      |          |          |
|------------|------|----------|----------|
| Uzbekistan | 2001 | 0.899862 | 0.73214  |
| Uzbekistan | 2002 | 0.894435 | 0.723247 |
| Uzbekistan | 2003 | 0.892522 | 0.716783 |
| Uzbekistan | 2004 | 0.89648  | 0.716733 |
| Uzbekistan | 2005 | 0.897849 | 0.728357 |
| Uzbekistan | 2006 | 0.887354 | 0.723319 |
| Uzbekistan | 2007 | 0.879009 | 0.725456 |
| Uzbekistan | 2008 | 0.868701 | 0.718806 |
| Uzbekistan | 2009 | 0.865821 | 0.718362 |
| Uzbekistan | 2010 | 0.876619 | 0.731268 |
| Uzbekistan | 2011 | 0.865302 | 0.727632 |
| Uzbekistan | 2012 | 0.862568 | 0.731741 |
| Uzbekistan | 2013 | 0.856119 | 0.730918 |
| Uzbekistan | 2014 | 0.845965 | 0.724626 |
| Uzbekistan | 2015 | 0.845181 | 0.726931 |
| Uzbekistan | 2016 | 0.839304 | 0.728291 |
| Uzbekistan | 2017 | 0.838265 | 0.723642 |
| Uzbekistan | 2018 | 0.835082 | 0.719203 |
| Uzbekistan | 2019 | 0.831718 | 0.71384  |
| Vanuatu    | 1990 | 0.924689 | 1.062804 |
| Vanuatu    | 1991 | 0.959062 | 1.090159 |
| Vanuatu    | 1992 | 0.992102 | 1.11732  |
| Vanuatu    | 1993 | 1.015954 | 1.136811 |
| Vanuatu    | 1994 | 1.050027 | 1.165347 |
| Vanuatu    | 1995 | 1.057606 | 1.170658 |

|                                    |      |          |          |
|------------------------------------|------|----------|----------|
| Vanuatu                            | 1996 | 1.075089 | 1.181653 |
| Vanuatu                            | 1997 | 1.081546 | 1.182417 |
| Vanuatu                            | 1998 | 1.087602 | 1.181903 |
| Vanuatu                            | 1999 | 1.083482 | 1.169205 |
| Vanuatu                            | 2000 | 1.055304 | 1.134576 |
| Vanuatu                            | 2001 | 1.03525  | 1.103403 |
| Vanuatu                            | 2002 | 0.979033 | 1.042508 |
| Vanuatu                            | 2003 | 0.939    | 0.996405 |
| Vanuatu                            | 2004 | 0.932133 | 0.979734 |
| Vanuatu                            | 2005 | 0.931551 | 0.967699 |
| Vanuatu                            | 2006 | 0.933997 | 0.962733 |
| Vanuatu                            | 2007 | 0.937084 | 0.957964 |
| Vanuatu                            | 2008 | 0.939521 | 0.955358 |
| Vanuatu                            | 2009 | 0.939143 | 0.952518 |
| Vanuatu                            | 2010 | 0.938401 | 0.95149  |
| Vanuatu                            | 2011 | 0.947135 | 0.960747 |
| Vanuatu                            | 2012 | 0.945052 | 0.960552 |
| Vanuatu                            | 2013 | 0.941907 | 0.960476 |
| Vanuatu                            | 2014 | 0.930911 | 0.952544 |
| Vanuatu                            | 2015 | 0.923052 | 0.947129 |
| Vanuatu                            | 2016 | 0.912979 | 0.93965  |
| Vanuatu                            | 2017 | 0.911947 | 0.940753 |
| Vanuatu                            | 2018 | 0.909456 | 0.940258 |
| Vanuatu                            | 2019 | 0.90635  | 0.939138 |
| Venezuela (Bolivarian Republic of) | 1990 | 0.816605 | 0.702689 |

|                                    |      |          |          |
|------------------------------------|------|----------|----------|
| Venezuela (Bolivarian Republic of) | 1991 | 0.804698 | 0.693203 |
| Venezuela (Bolivarian Republic of) | 1992 | 0.798843 | 0.686705 |
| Venezuela (Bolivarian Republic of) | 1993 | 0.757611 | 0.641868 |
| Venezuela (Bolivarian Republic of) | 1994 | 0.773954 | 0.64284  |
| Venezuela (Bolivarian Republic of) | 1995 | 0.78569  | 0.650344 |
| Venezuela (Bolivarian Republic of) | 1996 | 0.827465 | 0.689124 |
| Venezuela (Bolivarian Republic of) | 1997 | 0.859391 | 0.715852 |
| Venezuela (Bolivarian Republic of) | 1998 | 0.810625 | 0.676084 |
| Venezuela (Bolivarian Republic of) | 1999 | 0.831487 | 0.694345 |
| Venezuela (Bolivarian Republic of) | 2000 | 0.803139 | 0.671118 |
| Venezuela (Bolivarian Republic of) | 2001 | 0.799291 | 0.667806 |
| Venezuela (Bolivarian Republic of) | 2002 | 0.827619 | 0.684559 |
| Venezuela (Bolivarian Republic of) | 2003 | 0.765497 | 0.632291 |
| Venezuela (Bolivarian Republic of) | 2004 | 0.775109 | 0.637159 |
| Venezuela (Bolivarian Republic of) | 2005 | 0.759502 | 0.621158 |
| Venezuela (Bolivarian Republic of) | 2006 | 0.708105 | 0.576335 |
| Venezuela (Bolivarian Republic of) | 2007 | 0.670884 | 0.544186 |
| Venezuela (Bolivarian Republic of) | 2008 | 0.667097 | 0.540119 |
| Venezuela (Bolivarian Republic of) | 2009 | 0.678994 | 0.548394 |
| Venezuela (Bolivarian Republic of) | 2010 | 0.768656 | 0.622094 |
| Venezuela (Bolivarian Republic of) | 2011 | 0.78214  | 0.635776 |
| Venezuela (Bolivarian Republic of) | 2012 | 0.752834 | 0.615282 |
| Venezuela (Bolivarian Republic of) | 2013 | 0.769992 | 0.630856 |
| Venezuela (Bolivarian Republic of) | 2014 | 0.884428 | 0.726306 |
| Venezuela (Bolivarian Republic of) | 2015 | 0.880047 | 0.72823  |



|                                    |      |          |          |
|------------------------------------|------|----------|----------|
| Venezuela (Bolivarian Republic of) | 2016 | 0.860449 | 0.71614  |
| Venezuela (Bolivarian Republic of) | 2017 | 0.828765 | 0.692569 |
| Venezuela (Bolivarian Republic of) | 2018 | 0.805853 | 0.675996 |
| Venezuela (Bolivarian Republic of) | 2019 | 0.785368 | 0.659536 |
| Viet Nam                           | 1990 | 1.930348 | 1.258255 |
| Viet Nam                           | 1991 | 1.895754 | 1.240529 |
| Viet Nam                           | 1992 | 1.868496 | 1.226206 |
| Viet Nam                           | 1993 | 1.841509 | 1.210638 |
| Viet Nam                           | 1994 | 1.813586 | 1.193323 |
| Viet Nam                           | 1995 | 1.782829 | 1.172882 |
| Viet Nam                           | 1996 | 1.743699 | 1.147006 |
| Viet Nam                           | 1997 | 1.709193 | 1.122924 |
| Viet Nam                           | 1998 | 1.672772 | 1.096766 |
| Viet Nam                           | 1999 | 1.63651  | 1.070041 |
| Viet Nam                           | 2000 | 1.579058 | 1.030261 |
| Viet Nam                           | 2001 | 1.521513 | 0.993379 |
| Viet Nam                           | 2002 | 1.47358  | 0.962    |
| Viet Nam                           | 2003 | 1.431813 | 0.932566 |
| Viet Nam                           | 2004 | 1.392316 | 0.903543 |
| Viet Nam                           | 2005 | 1.353006 | 0.874162 |
| Viet Nam                           | 2006 | 1.337065 | 0.859607 |
| Viet Nam                           | 2007 | 1.324604 | 0.850056 |
| Viet Nam                           | 2008 | 1.323289 | 0.849737 |
| Viet Nam                           | 2009 | 1.321261 | 0.852674 |
| Viet Nam                           | 2010 | 1.328771 | 0.860246 |

|    |          |      |          |          |
|----|----------|------|----------|----------|
| 1  |          |      |          |          |
| 2  |          |      |          |          |
| 3  |          |      |          |          |
| 4  |          |      |          |          |
| 5  | Viet Nam | 2011 | 1.341013 | 0.87573  |
| 6  | Viet Nam | 2012 | 1.354551 | 0.89126  |
| 7  | Viet Nam | 2013 | 1.369053 | 0.906847 |
| 8  | Viet Nam | 2014 | 1.387531 | 0.923227 |
| 9  | Viet Nam | 2015 | 1.409908 | 0.938181 |
| 10 | Viet Nam | 2016 | 1.431575 | 0.953848 |
| 11 | Viet Nam | 2017 | 1.459148 | 0.972659 |
| 12 | Viet Nam | 2018 | 1.486234 | 0.990891 |
| 13 | Viet Nam | 2019 | 1.508687 | 1.006537 |
| 14 | Yemen    | 1990 | 0.981841 | 0.746822 |
| 15 | Yemen    | 1991 | 0.968788 | 0.745728 |
| 16 | Yemen    | 1992 | 0.950842 | 0.740663 |
| 17 | Yemen    | 1993 | 0.932491 | 0.735044 |
| 18 | Yemen    | 1994 | 0.913991 | 0.729153 |
| 19 | Yemen    | 1995 | 0.904266 | 0.730324 |
| 20 | Yemen    | 1996 | 0.896218 | 0.731679 |
| 21 | Yemen    | 1997 | 0.882889 | 0.728787 |
| 22 | Yemen    | 1998 | 0.870341 | 0.726354 |
| 23 | Yemen    | 1999 | 0.857908 | 0.723453 |
| 24 | Yemen    | 2000 | 0.847074 | 0.721681 |
| 25 | Yemen    | 2001 | 0.837908 | 0.720832 |
| 26 | Yemen    | 2002 | 0.832844 | 0.720939 |
| 27 | Yemen    | 2003 | 0.82958  | 0.723923 |
| 28 | Yemen    | 2004 | 0.828547 | 0.727283 |
| 29 | Yemen    | 2005 | 0.830121 | 0.733911 |
| 30 |          |      |          |          |
| 31 |          |      |          |          |
| 32 |          |      |          |          |
| 33 |          |      |          |          |
| 34 |          |      |          |          |
| 35 |          |      |          |          |
| 36 |          |      |          |          |
| 37 |          |      |          |          |
| 38 |          |      |          |          |
| 39 |          |      |          |          |
| 40 |          |      |          |          |
| 41 |          |      |          |          |
| 42 |          |      |          |          |
| 43 |          |      |          |          |
| 44 |          |      |          |          |
| 45 |          |      |          |          |
| 46 |          |      |          |          |

1  
2  
3  
4  
5  
6  
7  
8  
9  
10  
11  
12  
13  
14  
15  
16  
17  
18  
19  
20  
21  
22  
23  
24  
25  
26  
27  
28  
29  
30  
31  
32  
33  
34  
35  
36  
37  
38  
39  
40  
41  
42  
43  
44  
45  
46

|        |      |          |          |
|--------|------|----------|----------|
| Yemen  | 2006 | 0.829255 | 0.735995 |
| Yemen  | 2007 | 0.83175  | 0.740204 |
| Yemen  | 2008 | 0.832213 | 0.742458 |
| Yemen  | 2009 | 0.832872 | 0.745576 |
| Yemen  | 2010 | 0.835204 | 0.752401 |
| Yemen  | 2011 | 0.845055 | 0.763452 |
| Yemen  | 2012 | 0.853337 | 0.773794 |
| Yemen  | 2013 | 0.862728 | 0.784063 |
| Yemen  | 2014 | 0.869438 | 0.792211 |
| Yemen  | 2015 | 0.873679 | 0.798236 |
| Yemen  | 2016 | 0.879447 | 0.80375  |
| Yemen  | 2017 | 0.885689 | 0.808814 |
| Yemen  | 2018 | 0.891526 | 0.812253 |
| Yemen  | 2019 | 0.897097 | 0.814499 |
| Zambia | 1990 | 0.874025 | 0.844793 |
| Zambia | 1991 | 0.860211 | 0.835418 |
| Zambia | 1992 | 0.844285 | 0.825868 |
| Zambia | 1993 | 0.821036 | 0.808517 |
| Zambia | 1994 | 0.809962 | 0.801534 |
| Zambia | 1995 | 0.79626  | 0.791593 |
| Zambia | 1996 | 0.782948 | 0.782316 |
| Zambia | 1997 | 0.766796 | 0.76913  |
| Zambia | 1998 | 0.750685 | 0.754682 |
| Zambia | 1999 | 0.732818 | 0.737519 |
| Zambia | 2000 | 0.707935 | 0.712561 |

|          |      |          |          |
|----------|------|----------|----------|
| Zambia   | 2001 | 0.693031 | 0.695964 |
| Zambia   | 2002 | 0.677749 | 0.678508 |
| Zambia   | 2003 | 0.667889 | 0.664051 |
| Zambia   | 2004 | 0.659869 | 0.648766 |
| Zambia   | 2005 | 0.655895 | 0.638442 |
| Zambia   | 2006 | 0.660793 | 0.637345 |
| Zambia   | 2007 | 0.659858 | 0.631617 |
| Zambia   | 2008 | 0.660439 | 0.627202 |
| Zambia   | 2009 | 0.667305 | 0.629889 |
| Zambia   | 2010 | 0.679315 | 0.637493 |
| Zambia   | 2011 | 0.69254  | 0.647015 |
| Zambia   | 2012 | 0.707016 | 0.658908 |
| Zambia   | 2013 | 0.720994 | 0.669655 |
| Zambia   | 2014 | 0.729531 | 0.67707  |
| Zambia   | 2015 | 0.735597 | 0.683088 |
| Zambia   | 2016 | 0.741109 | 0.689189 |
| Zambia   | 2017 | 0.749312 | 0.697265 |
| Zambia   | 2018 | 0.752969 | 0.70141  |
| Zambia   | 2019 | 0.759635 | 0.707038 |
| Zimbabwe | 1990 | 0.661655 | 0.555791 |
| Zimbabwe | 1991 | 0.640232 | 0.541326 |
| Zimbabwe | 1992 | 0.610999 | 0.522021 |
| Zimbabwe | 1993 | 0.567077 | 0.49111  |
| Zimbabwe | 1994 | 0.515934 | 0.449828 |
| Zimbabwe | 1995 | 0.461896 | 0.404784 |

1  
2  
3  
4  
5  
6  
7  
8  
9  
10  
11  
12  
13  
14  
15  
16  
17  
18  
19  
20  
21  
22  
23  
24  
25  
26  
27  
28  
29  
30  
31  
32  
33  
34  
35  
36  
37  
38  
39  
40  
41  
42  
43  
44  
45  
46

|          |      |          |          |
|----------|------|----------|----------|
| Zimbabwe | 1996 | 0.418462 | 0.364105 |
| Zimbabwe | 1997 | 0.392742 | 0.335841 |
| Zimbabwe | 1998 | 0.414159 | 0.346022 |
| Zimbabwe | 1999 | 0.449094 | 0.366171 |
| Zimbabwe | 2000 | 0.487121 | 0.389527 |
| Zimbabwe | 2001 | 0.512585 | 0.40252  |
| Zimbabwe | 2002 | 0.54821  | 0.423934 |
| Zimbabwe | 2003 | 0.584949 | 0.445465 |
| Zimbabwe | 2004 | 0.618119 | 0.464381 |
| Zimbabwe | 2005 | 0.616168 | 0.459484 |
| Zimbabwe | 2006 | 0.640547 | 0.473186 |
| Zimbabwe | 2007 | 0.658688 | 0.483898 |
| Zimbabwe | 2008 | 0.694945 | 0.507221 |
| Zimbabwe | 2009 | 0.7293   | 0.52948  |
| Zimbabwe | 2010 | 0.733864 | 0.532571 |
| Zimbabwe | 2011 | 0.724001 | 0.525821 |
| Zimbabwe | 2012 | 0.727939 | 0.527944 |
| Zimbabwe | 2013 | 0.739323 | 0.534652 |
| Zimbabwe | 2014 | 0.759521 | 0.547145 |
| Zimbabwe | 2015 | 0.758458 | 0.546135 |
| Zimbabwe | 2016 | 0.756162 | 0.544612 |
| Zimbabwe | 2017 | 0.757829 | 0.544924 |
| Zimbabwe | 2018 | 0.757228 | 0.54387  |
| Zimbabwe | 2019 | 0.757349 | 0.543382 |

## STROBE Statement—checklist of items that should be included in reports of observational studies

|                              | Item No                                                                                                                                                                                                                                                                                                   | Recommendation                                                                                                                                                                                                                                                                                                                                                                                                                                                         | Page No |
|------------------------------|-----------------------------------------------------------------------------------------------------------------------------------------------------------------------------------------------------------------------------------------------------------------------------------------------------------|------------------------------------------------------------------------------------------------------------------------------------------------------------------------------------------------------------------------------------------------------------------------------------------------------------------------------------------------------------------------------------------------------------------------------------------------------------------------|---------|
| <b>Title and abstract</b>    | 1                                                                                                                                                                                                                                                                                                         | (a) Indicate the study's design with a commonly used term in the title or the abstract                                                                                                                                                                                                                                                                                                                                                                                 | 2       |
|                              |                                                                                                                                                                                                                                                                                                           | (b) Provide in the abstract an informative and balanced summary of what was done and what was found                                                                                                                                                                                                                                                                                                                                                                    | 2       |
| <b>Introduction</b>          |                                                                                                                                                                                                                                                                                                           |                                                                                                                                                                                                                                                                                                                                                                                                                                                                        |         |
| Background/rationale         | 2                                                                                                                                                                                                                                                                                                         | Explain the scientific background and rationale for the investigation being reported                                                                                                                                                                                                                                                                                                                                                                                   | 4       |
| Objectives                   | 3                                                                                                                                                                                                                                                                                                         | State specific objectives, including any prespecified hypotheses                                                                                                                                                                                                                                                                                                                                                                                                       | 4       |
| <b>Methods</b>               |                                                                                                                                                                                                                                                                                                           |                                                                                                                                                                                                                                                                                                                                                                                                                                                                        |         |
| Study design                 | 4                                                                                                                                                                                                                                                                                                         | Present key elements of study design early in the paper                                                                                                                                                                                                                                                                                                                                                                                                                | 4       |
| Setting                      | 5                                                                                                                                                                                                                                                                                                         | Describe the setting, locations, and relevant dates, including periods of recruitment, exposure, follow-up, and data collection                                                                                                                                                                                                                                                                                                                                        | 4       |
| Participants                 | 6                                                                                                                                                                                                                                                                                                         | (a) <i>Cohort study</i> —Give the eligibility criteria, and the sources and methods of selection of participants. Describe methods of follow-up<br><i>Case-control study</i> —Give the eligibility criteria, and the sources and methods of case ascertainment and control selection. Give the rationale for the choice of cases and controls<br><i>Cross-sectional study</i> —Give the eligibility criteria, and the sources and methods of selection of participants | 4       |
|                              |                                                                                                                                                                                                                                                                                                           | (b) <i>Cohort study</i> —For matched studies, give matching criteria and number of exposed and unexposed<br><i>Case-control study</i> —For matched studies, give matching criteria and the number of controls per case                                                                                                                                                                                                                                                 | NA      |
| Variables                    | 7                                                                                                                                                                                                                                                                                                         | Clearly define all outcomes, exposures, predictors, potential confounders, and effect modifiers. Give diagnostic criteria, if applicable                                                                                                                                                                                                                                                                                                                               | NA      |
| Data sources/<br>measurement | 8*                                                                                                                                                                                                                                                                                                        | For each variable of interest, give sources of data and details of methods of assessment (measurement). Describe comparability of assessment methods if there is more than one group                                                                                                                                                                                                                                                                                   | 4       |
| Bias                         | 9                                                                                                                                                                                                                                                                                                         | Describe any efforts to address potential sources of bias                                                                                                                                                                                                                                                                                                                                                                                                              | NA      |
| Study size                   | 10                                                                                                                                                                                                                                                                                                        | Explain how the study size was arrived at                                                                                                                                                                                                                                                                                                                                                                                                                              | NA      |
| Quantitative variables       | 11                                                                                                                                                                                                                                                                                                        | Explain how quantitative variables were handled in the analyses. If applicable, describe which groupings were chosen and why                                                                                                                                                                                                                                                                                                                                           | NA      |
| Statistical methods          | 12                                                                                                                                                                                                                                                                                                        | (a) Describe all statistical methods, including those used to control for confounding                                                                                                                                                                                                                                                                                                                                                                                  | 4, 5    |
|                              |                                                                                                                                                                                                                                                                                                           | (b) Describe any methods used to examine subgroups and interactions                                                                                                                                                                                                                                                                                                                                                                                                    | 4, 5    |
|                              | (c) Explain how missing data were addressed                                                                                                                                                                                                                                                               | NA                                                                                                                                                                                                                                                                                                                                                                                                                                                                     |         |
|                              | (d) <i>Cohort study</i> —If applicable, explain how loss to follow-up was addressed<br><i>Case-control study</i> —If applicable, explain how matching of cases and controls was addressed<br><i>Cross-sectional study</i> —If applicable, describe analytical methods taking account of sampling strategy | NA                                                                                                                                                                                                                                                                                                                                                                                                                                                                     |         |
|                              | (e) Describe any sensitivity analyses                                                                                                                                                                                                                                                                     | NA                                                                                                                                                                                                                                                                                                                                                                                                                                                                     |         |

Continued on next page

1  
2  
3  
4  
5  
6  
7  
8  
9  
10  
11  
12  
13  
14  
15  
16  
17  
18  
19  
20  
21  
22  
23  
24  
25  
26  
27  
28  
29  
30  
31  
32  
33  
34  
35  
36  
37  
38  
39  
40  
41  
42  
43  
44  
45  
46  
47  
48  
49  
50  
51  
52  
53  
54  
55  
56  
57  
58  
59  
60**Results**

|                  |     |                                                                                                                                                                                                              |      |
|------------------|-----|--------------------------------------------------------------------------------------------------------------------------------------------------------------------------------------------------------------|------|
| Participants     | 13* | (a) Report numbers of individuals at each stage of study—eg numbers potentially eligible, examined for eligibility, confirmed eligible, included in the study, completing follow-up, and analysed            | 5, 6 |
|                  |     | (b) Give reasons for non-participation at each stage                                                                                                                                                         | NA   |
|                  |     | (c) Consider use of a flow diagram                                                                                                                                                                           | NA   |
| Descriptive data | 14* | (a) Give characteristics of study participants (eg demographic, clinical, social) and information on exposures and potential confounders                                                                     | 5, 6 |
|                  |     | (b) Indicate number of participants with missing data for each variable of interest                                                                                                                          | NA   |
|                  |     | (c) <i>Cohort study</i> —Summarise follow-up time (eg, average and total amount)                                                                                                                             | NA   |
| Outcome data     | 15* | <i>Cohort study</i> —Report numbers of outcome events or summary measures over time                                                                                                                          | 5    |
|                  |     | <i>Case-control study</i> —Report numbers in each exposure category, or summary measures of exposure                                                                                                         | NA   |
|                  |     | <i>Cross-sectional study</i> —Report numbers of outcome events or summary measures                                                                                                                           | NA   |
| Main results     | 16  | (a) Give unadjusted estimates and, if applicable, confounder-adjusted estimates and their precision (eg, 95% confidence interval). Make clear which confounders were adjusted for and why they were included | 5-8  |
|                  |     | (b) Report category boundaries when continuous variables were categorized                                                                                                                                    | NA   |
|                  |     | (c) If relevant, consider translating estimates of relative risk into absolute risk for a meaningful time period                                                                                             | NA   |
| Other analyses   | 17  | Report other analyses done—eg analyses of subgroups and interactions, and sensitivity analyses                                                                                                               | NA   |

**Discussion**

|                  |    |                                                                                                                                                                            |      |
|------------------|----|----------------------------------------------------------------------------------------------------------------------------------------------------------------------------|------|
| Key results      | 18 | Summarise key results with reference to study objectives                                                                                                                   | 5-8  |
| Limitations      | 19 | Discuss limitations of the study, taking into account sources of potential bias or imprecision. Discuss both direction and magnitude of any potential bias                 | 10   |
| Interpretation   | 20 | Give a cautious overall interpretation of results considering objectives, limitations, multiplicity of analyses, results from similar studies, and other relevant evidence | 10   |
| Generalisability | 21 | Discuss the generalisability (external validity) of the study results                                                                                                      | 8-10 |

**Other information**

|         |    |                                                                                                                                                               |    |
|---------|----|---------------------------------------------------------------------------------------------------------------------------------------------------------------|----|
| Funding | 22 | Give the source of funding and the role of the funders for the present study and, if applicable, for the original study on which the present article is based | 11 |
|---------|----|---------------------------------------------------------------------------------------------------------------------------------------------------------------|----|

\*Give information separately for cases and controls in case-control studies and, if applicable, for exposed and unexposed groups in cohort and cross-sectional studies.

**Note:** An Explanation and Elaboration article discusses each checklist item and gives methodological background and published examples of transparent reporting. The STROBE checklist is best used in conjunction with this article (freely available on the Web sites of PLoS Medicine at <http://www.plosmedicine.org/>, Annals of Internal Medicine at <http://www.annals.org/>, and Epidemiology at <http://www.epidem.com/>). Information on the STROBE Initiative is available at [www.strobe-statement.org](http://www.strobe-statement.org).

# BMJ Open

## Secular Trends of Epidemiologic Patterns of Chronic Kidney Disease Over Three Decades: An Updated Analysis of the Global Burden of Disease Study 2019

|                                 |                                                                                                                                                                                                                                                                                                                                                                                                                                                                                                                                                                                                                                                                                                                                                                                                                                                                                                                                                                                                                                                                                                                                                               |
|---------------------------------|---------------------------------------------------------------------------------------------------------------------------------------------------------------------------------------------------------------------------------------------------------------------------------------------------------------------------------------------------------------------------------------------------------------------------------------------------------------------------------------------------------------------------------------------------------------------------------------------------------------------------------------------------------------------------------------------------------------------------------------------------------------------------------------------------------------------------------------------------------------------------------------------------------------------------------------------------------------------------------------------------------------------------------------------------------------------------------------------------------------------------------------------------------------|
| Journal:                        | <i>BMJ Open</i>                                                                                                                                                                                                                                                                                                                                                                                                                                                                                                                                                                                                                                                                                                                                                                                                                                                                                                                                                                                                                                                                                                                                               |
| Manuscript ID                   | bmjopen-2022-064540.R2                                                                                                                                                                                                                                                                                                                                                                                                                                                                                                                                                                                                                                                                                                                                                                                                                                                                                                                                                                                                                                                                                                                                        |
| Article Type:                   | Original research                                                                                                                                                                                                                                                                                                                                                                                                                                                                                                                                                                                                                                                                                                                                                                                                                                                                                                                                                                                                                                                                                                                                             |
| Date Submitted by the Author:   | 31-Jan-2023                                                                                                                                                                                                                                                                                                                                                                                                                                                                                                                                                                                                                                                                                                                                                                                                                                                                                                                                                                                                                                                                                                                                                   |
| Complete List of Authors:       | Feng, Xiaojin; Affiliated Hospital of Weifang Medical University, Department of Endocrinology and Metabolism; Affiliated Hospital of Weifang Medical University, Department of Clinical Research Center<br>Hou, Ningning; Affiliated Hospital of Weifang Medical University, Department of Endocrinology and Metabolism<br>Chen, Zhenna; Affiliated Hospital of Weifang Medical University, Department of Ophthalmology<br>Liu, Jing; The Second Affiliated Hospital of Shaanxi University of Chinese Medicine, Department of Cardiovascular Medicine<br>Li, Xue; Affiliated Hospital of Weifang Medical University, Department of Clinical Research Center; Affiliated Hospital of Weifang Medical University, Department of Pathology<br>Sun, Xiaodong; Affiliated Hospital of Weifang Medical University, Department of Endocrinology and Metabolism; Affiliated Hospital of Weifang Medical University, Department of Clinical Research Center<br>Liu, Yongping; Affiliated Hospital of Weifang Medical University, Department of Endocrinology and Metabolism; Affiliated Hospital of Weifang Medical University, Department of Clinical Research Center |
| <b>Primary Subject Heading</b>: | Global health                                                                                                                                                                                                                                                                                                                                                                                                                                                                                                                                                                                                                                                                                                                                                                                                                                                                                                                                                                                                                                                                                                                                                 |
| Secondary Subject Heading:      | Epidemiology, Global health                                                                                                                                                                                                                                                                                                                                                                                                                                                                                                                                                                                                                                                                                                                                                                                                                                                                                                                                                                                                                                                                                                                                   |
| Keywords:                       | PUBLIC HEALTH, EPIDEMIOLOGY, Chronic renal failure < NEPHROLOGY                                                                                                                                                                                                                                                                                                                                                                                                                                                                                                                                                                                                                                                                                                                                                                                                                                                                                                                                                                                                                                                                                               |
|                                 |                                                                                                                                                                                                                                                                                                                                                                                                                                                                                                                                                                                                                                                                                                                                                                                                                                                                                                                                                                                                                                                                                                                                                               |

SCHOLARONE™  
Manuscripts





I, the Submitting Author has the right to grant and does grant on behalf of all authors of the Work (as defined in the below author licence), an exclusive licence and/or a non-exclusive licence for contributions from authors who are: i) UK Crown employees; ii) where BMJ has agreed a CC-BY licence shall apply, and/or iii) in accordance with the terms applicable for US Federal Government officers or employees acting as part of their official duties; on a worldwide, perpetual, irrevocable, royalty-free basis to BMJ Publishing Group Ltd ("BMJ") its licensees and where the relevant Journal is co-owned by BMJ to the co-owners of the Journal, to publish the Work in this journal and any other BMJ products and to exploit all rights, as set out in our [licence](#).

The Submitting Author accepts and understands that any supply made under these terms is made by BMJ to the Submitting Author unless you are acting as an employee on behalf of your employer or a postgraduate student of an affiliated institution which is paying any applicable article publishing charge ("APC") for Open Access articles. Where the Submitting Author wishes to make the Work available on an Open Access basis (and intends to pay the relevant APC), the terms of reuse of such Open Access shall be governed by a Creative Commons licence – details of these licences and which [Creative Commons](#) licence will apply to this Work are set out in our licence referred to above.

Other than as permitted in any relevant BMJ Author's Self Archiving Policies, I confirm this Work has not been accepted for publication elsewhere, is not being considered for publication elsewhere and does not duplicate material already published. I confirm all authors consent to publication of this Work and authorise the granting of this licence.

# Secular Trends of Epidemiologic Patterns of Chronic Kidney Disease Over Three Decades: An Updated Analysis of the Global Burden of Disease Study 2019

1 **Xiaojin Feng<sup>1,2†</sup>, Ningning Hou<sup>1†</sup>, Zhenna Chen<sup>3†</sup>, Jing Liu<sup>4</sup>, Xue Li<sup>2,5</sup>, Xiaodong**  
2 **Sun<sup>1,2\*</sup>, and Yongping Liu<sup>1,2\*</sup>**

3 <sup>1</sup>Department of Endocrinology and Metabolism, Affiliated Hospital of Weifang  
4 Medical University, Weifang, China

5 <sup>2</sup>Department of Clinical Research Center, Affiliated Hospital of Weifang Medical  
6 University, Weifang, China

7 <sup>3</sup>Department of Ophthalmology, Affiliated Hospital of Weifang Medical University,  
8 Weifang, China

9 <sup>4</sup>Department of Cardiovascular Medicine, The Second Affiliated Hospital of Shaanxi  
10 University of Chinese Medicine, Xianyang, China

11 <sup>5</sup>Department of Pathology, Affiliated Hospital of Weifang Medical University,  
12 Weifang, China

13 †These authors have contributed equally to this work and share first authorship

## 14 \* Correspondence:

15 Yongping Liu, M.D., Ph.D., Department of Endocrinology and Metabolism,  
16 Affiliated Hospital of Weifang Medical University, No. 2428 Yuhe Road, Weifang,  
17 Shandong, 261000, China. Email: lypfree@hotmail.com

18 Xiaodong Sun, M.D., Ph.D., Department of Endocrinology and Metabolism,  
19 Affiliated Hospital of Weifang Medical University, No. 2428 Yuhe Road, Weifang,  
20 Shandong, 261000, China. Email: xiaodong.sun@wfmc.edu.cn

21 Word count: 3988

22 **Keywords: Chronic kidney disease, global burden of disease, death, aging, risk**  
23 **factors**

24

1  
2  
3  
4  
5  
6  
7  
8  
9  
10  
11  
12  
13  
14  
15  
16  
17  
18  
19  
20  
21  
22  
23  
24  
25  
26  
27  
28  
29  
30  
31  
32  
33  
34  
35  
36  
37  
38  
39  
40  
41  
42  
43  
44  
45  
46  
47  
48  
49  
50  
51  
52  
53  
54  
55  
56  
57  
58  
59  
60

## Abstract

**Objectives:** To assess the characteristics of the global death burden imposed by CKD and the attributable risk factors from 1990 to 2019 to help inform a framework for policy discussions, resource allocation and research priorities.

**Design:** A population-based observational study.

**Setting:** The death data and relative risk factors were obtained from the Global Burden of Disease Study 2019 database.

**Main outcome measures:** Based on the GBD database, we estimated the death burden attributable to CKD stratified by sociodemographic index (SDI), geographic location, sex, age group, time period and risk factors from 1990 to 2019.

**Results:** Over 3-decade study period, the global number of CKD-related deaths increased from 0.60 million (95% UI: 0.57-0.63 million) in 1990 to 1.43 million (95% UI: 1.31-1.52 million) in 2019. The age-standardized death rate (ASDR) of CKD, among all causes, increased from 15th in 1990 to 10th in 2019. Globally, the ASDR in males was higher than that in females. CKD-related deaths mainly occurred in those aged over 50 years, especially in regions with higher SDIs. The ASDR was negatively related to SDI ( $\rho = -0.603$ ,  $P < 0.0001$ ). Among risk factors, metabolic risk factors, especially systolic blood pressure (SBP), fasting plasma glucose (FPG) and body mass index (BMI), were the main contributors to CKD-related deaths. Although the high-temperature-related death burden was low, the trend increased sharply in lower SDI regions.

**Conclusions:** CKD-related deaths continue to increase, with the majority occurring in elderly adults. The CKD-related death burden is higher in men than in women. Additionally, the increasing high-temperature-related death burdens in lower SDI regions should receive social attention.

1  
2  
3  
4  
5  
6  
7  
8  
9  
10  
11  
12  
13  
14  
15  
16  
17  
18  
19  
20  
21  
22  
23  
24  
25  
26  
27  
28  
29  
30  
31  
32  
33  
34  
35  
36  
37  
38  
39  
40  
41  
42  
43  
44  
45  
46  
47  
48  
49  
50  
51  
52  
53  
54  
55  
56  
57  
58  
59  
60

**Strengths and limitations of this study**

- This study evaluated the disease burden changing trends of chronic kidney disease over the past three decades.
- The disease burden changing trends and the relative risk factors of CKD were quantified to reveal the extent of the epidemic and suggest a framework for policy discussions, resource allocation and research priorities.
- Data on the impact of metabolic factors other than blood pressure and blood glucose, such as triglycerides, cholesterol or uric acid, on the global burden of CKD are lacking.

For peer review only

## 61 INTRODUCTION

62 Chronic kidney disease (CKD) refers to chronic renal dysfunction caused by various  
63 factors for more than 3 months.[1, 2] According to relevant statistics, there were an  
64 estimated 697.5 million cases of CKD worldwide in 2017.[1] The prevalence of CKD  
65 has increased with the aging of the population and has become a global public health  
66 problem.[3] The incidence rate increased by 29.3% compared with that in 1990.[1]  
67 Once diagnosed with CKD, the kidney function would gradually decline until the end-  
68 stage renal disease or even death, with little chance of reversal, imposing a heavy  
69 economic burden on society.

70 Studies have found that the sociodemographic index (SDI), human development level,  
71 economic situation, and health access and quality index are closely related to the CKD  
72 incidence.[4-7] Complex influencing factors make the diagnosis and treatment of  
73 CKD difficult, which seriously increases the public health burden.[8, 9] Although  
74 several studies on CKD have been conducted,[1, 10] detailed death burden analyses of  
75 recent 3-decade period are scarce and need to be further studied.

76 In the context of current global Big Data, deep quantitative analyses of CKD  
77 morbidity and mortality and their influencing factors are crucial in guiding decisions  
78 by policymakers and health care providers. However, the details of CKD-related  
79 mortality have been poorly studied worldwide. Considering these factors, we carried  
80 out research on the global CKD-related death burden and related risk factors from  
81 1990-2019. We also analyzed the numbers of deaths caused by CKD and the age-  
82 standardized death rates (ASDRs) by time period, region, age, risk factors and sex.

## 84 MATERIALS AND METHODS

### 85 Study data

86 Data analyzed in the present study were obtained from the online database the Global  
87 Health Data Exchange (GHDx) query tool ([http://ghdx.healthdata.org/gbd-results-  
88 tool](http://ghdx.healthdata.org/gbd-results-tool)), which were based on literature studies, survey data, surveillance data, medical  
89 records, health insurance claims and statistical model analysis.[11] The database  
90 provides epidemiological data about 369 diseases and 87 attributable risk factors in  
91 204 countries and territories from January 1, 1990 to December 31, 2019,  
92 disaggregated by time, location and sex, and is constantly updated by ongoing  
93 multinational cooperative organizations.[12, 13] Detailed research methods followed  
94 the Global Burden of Disease study (GBD) 2019.[12, 13] The SDI, based on fertility,  
95 income per capita and educational attainment, was used as a composite indicator of  
96 the degree of health-related development at the national or regional level. The SDI  
97 value ranges from 0 to 1, and all the countries were classified into five SDI regions:  
98 low-, low-middle-, middle-, high-middle- and high-SDI regions, according to the SDI  
99 quintiles. Regions with a lower value indicated a lower degree of development  
100 associated with health outcomes. In addition, countries were divided into 21 regions  
101 according to geographical location. Age-standardized rates (ASRs) based on the  
102 updated standard population were also available in the GBD 2019, allowing the

103 analysis of CKD according to age structure and population size.

#### 104 **Statistical analysis**

105 Numbers and ASDRs, and associated 95% uncertainty intervals (UIs) provided by  
106 GBDx, were analyzed to quantify the CKD-related death burden attributed to risk  
107 factors. Ninety-five percent UI values fell between the 2.5th and 97.5th percentiles of  
108 1000 samples that were extracted from the posterior distribution in the modeling  
109 process.[14] The time trend of an ASR over a specified time period was represented  
110 by the estimated annual percentage change (EAPC), which detailed calculation  
111 method has been reported in many previously published GBD studies.[15, 16] In  
112 brief, the natural logarithm of the ASR is assumed to be linear over time; therefore,  
113  $\ln(\text{ASR}) = \alpha + \beta \times (\text{calendar year}) + \text{error term}$ . The  $\text{EAPC} = 100 \times (\exp(\beta) - 1)$ , and the  
114 95% confidence interval (95% CI) can be obtained from the linear regression model.  
115 To assess the trends of data over time from 1990 to 2019, Joinpoint trend analyses  
116 were performed by fitting several different line segments on a logarithmic scale with  
117 the simplest model. Significant changes were identified by permutation tests and  
118 estimated by the Monte Carlo method. A *P* value less than 0.05 was used to denote to  
119 be statistical significance.

120 All statistical and graphical analyses were carried out using R version 4.1.2 (Vienna,  
121 Austria), Joinpoint software version 4.9.0.1 (National Cancer Institute, USA) and  
122 GraphPad Prism 8 (California, USA).

#### 123 **Patient and Public Involvement**

124 Patients or the public were not involved in this study.

## 126 **RESULTS**

### 127 **1. Global burden of chronic kidney disease**

#### 128 ***1.1 Changing trend of global CKD-related burden from 1990 to 2019***

129 Globally, there were an estimated 697.3 million CKD cases and 19.0 million incident  
130 cases in 2019, both of which were more than twice those in 1990 (supplementary  
131 table 1, supplementary table 2, supplementary figure 1a and supplementary figure 1b).  
132 The number of deaths caused by CKD doubled from 0.6 million (95% UI: 0.57-0.63  
133 million) in 1990 to 1.4 million (95% UI: 1.31-1.52 million) in 2019 (table 1; figure  
134 1a). Among all the causes of death, the percentage of deaths due to CKD doubled  
135 from 1.3% to 2.5%. The numbers of deaths caused by CKD increased from 19th in  
136 1990 to 11th in 2019 (supplementary figure 2a), and the ASDR increased from 15th to  
137 10th (supplementary figure 2b). Global DALYs also doubled from 21.5 million in  
138 1990 to 41.5 million in 2019 (supplementary table 3 and supplementary figure 1c).  
139 During this period, the age-standardized incidence rate (ASIR) increased over time,  
140 with an EAPC of 3.2 (95% CI: 3.11 to 3.19) (supplementary table 2, supplementary  
141 figure 3). The ASDR, DALYs, YLLs and YLDs showed upward trends in the first  
142 half of the study period but downward trends in the latter years according to the  
143 Joinpoint analyses (figure 1b right, supplementary figure 3). These trends were  
144 consistent in both the male and female (supplementary figure 3).

145

146 **Table 1.** Death cases and age-standardized death rates of chronic kidney disease in 1990 and

147 2019, and the temporal trends from 1990 to 2019.

|                             | 1990                                      |                                         | 2019                                      |                                            | 1990-2019                |
|-----------------------------|-------------------------------------------|-----------------------------------------|-------------------------------------------|--------------------------------------------|--------------------------|
| Characteristics             | Death cases ( $\times 10^3$ )<br>(95% UI) | ASDR per 100,000<br>population (95% UI) | Death cases ( $\times 10^3$ )<br>(95% UI) | ASDR per 100,000<br>population (95%<br>UI) | EAPC of ASDR<br>(95% CI) |
| Global                      | 601.31 (567.6-633.79)                     | 16.14 (15.13-17.13)                     | 1427.23 (1313.73-<br>1524.55)             | 18.29 (16.72-19.55)                        | 0.55 (0.46 to 0.64)      |
| <b>Gender</b>               |                                           |                                         |                                           |                                            |                          |
| Males                       | 313.94 (293.38-338.57)                    | 19.55 (18.19-21.18)                     | 741.38 (685.84-801.7)                     | 21.59 (19.93-23.27)                        | 0.55 (0.46 to 0.64)      |
| Females                     | 287.37 (268.8-305.44)                     | 13.89 (12.91-14.79)                     | 685.85 (614.92-741.57)                    | 15.8 (14.17-17.09)                         | 0.55 (0.46 to 0.64)      |
| <b>SDI regions</b>          |                                           |                                         |                                           |                                            |                          |
| Low                         | 62.02 (55.89-68.54)                       | 27.21 (24.08-30.65)                     | 125.07 (112.78-137.96)                    | 25.28 (22.9-27.68)                         | -0.27 (-0.31 to -0.22)   |
| Low-middle                  | 126.51 (114.96-138.84)                    | 21.9 (19.73-24.25)                      | 293.49 (265.9-320.13)                     | 22.95 (20.77-25.04)                        | 0.14 (0.01 to 0.26)      |
| Middle                      | 196.59 (183.72-209.89)                    | 21.01 (19.54-22.84)                     | 506.13 (464.49-547.47)                    | 22.8 (20.79-24.75)                         | 0.43 (0.36 to 0.5)       |
| High-middle                 | 116.33 (109.59-124.18)                    | 12.25 (11.42-13.2)                      | 227.99 (207.02-244.66)                    | 11.78 (10.65-12.65)                        | -0.08 (-0.22 to 0.06)    |
| High                        | 99.47 (92.56-103.08)                      | 9.61 (8.92-9.98)                        | 273.59 (236.92-294.76)                    | 12.58 (11.09-13.47)                        | 1.21 (1.09 to 1.32)      |
| <b>21 GBD regions</b>       |                                           |                                         |                                           |                                            |                          |
| Central Asia                | 5.04 (4.73-5.75)                          | 10.01 (9.33-11.63)                      | 10.38 (9.43-11.49)                        | 14.75 (13.48-16.17)                        | 1.11 (0.73 to 1.49)      |
| Central Europe              | 13.14 (12.7-13.56)                        | 9.62 (9.22-9.93)                        | 18.76 (16.33-21.22)                       | 8.61 (7.5-9.74)                            | -0.23 (-0.36 to -0.11)   |
| Eastern Europe              | 11.06 (10.74-11.35)                       | 4.41 (4.25-4.53)                        | 15.93 (14.23-17.56)                       | 4.85 (4.34-5.34)                           | -0.16 (-0.42 to 0.09)    |
| Australasia                 | 2.02 (1.85-2.14)                          | 9.27 (8.39-9.87)                        | 6.12 (5.14-6.85)                          | 10.77 (9.17-12)                            | 0.7 (0.62 to 0.78)       |
| High-income Asia<br>Pacific | 22.94 (21.27-23.86)                       | 13.12 (12.01-13.73)                     | 54.14 (42.82-60.58)                       | 9.13 (7.54-10.06)                          | -1.35 (-1.43 to -1.28)   |
| High-income North           | 35.75 (32.89-37.2)                        | 9.79 (9.03-10.18)                       | 114.46 (102.38-122.48)                    | 16.88 (15.26-17.98)                        | 2.26 (2.07 to 2.45)      |

148



|                              |                       |                     |                        |                     |                        |
|------------------------------|-----------------------|---------------------|------------------------|---------------------|------------------------|
| America                      |                       |                     |                        |                     |                        |
| Southern Latin America       | 8.99 (8.51-9.42)      | 20.79 (19.61-21.83) | 21.69 (19.81-23.33)    | 25.45 (23.27-27.34) | 0.72 (0.43 to 1.02)    |
| Western Europe               | 49.78 (46.2-51.89)    | 8.49 (7.86-8.87)    | 116.66 (99.12-126.16)  | 9.97 (8.58-10.73)   | 0.98 (0.86 to 1.1)     |
| Andean Latin America         | 5.24 (4.78-5.74)      | 25.51 (23.13-28.1)  | 19.38 (16.14-22.96)    | 35.68 (29.73-42.21) | 1.37 (1.07 to 1.67)    |
| Caribbean                    | 4.79 (4.47-5.28)      | 18.59 (17.28-20.52) | 12.66 (10.85-14.78)    | 24.58 (21.08-28.71) | 1.44 (1.31 to 1.58)    |
| Central Latin America        | 20.7 (19.77-21.36)    | 25.77 (24.22-26.76) | 111.71 (98.57-125.86)  | 48.11 (42.52-54.16) | 2.42 (2.09 to 2.74)    |
| Tropical Latin America       | 16.59 (15.87-17.14)   | 19.36 (18.16-20.14) | 44.22 (40.46-46.73)    | 18.96 (17.25-20.06) | 0.01 (-0.06 to 0.09)   |
| North Africa and Middle East | 52.6 (47.64-61.84)    | 34.74 (30.67-44.08) | 111.81 (96.42-130.85)  | 30.37 (26.34-35.39) | -0.43 (-0.51 to -0.34) |
| South Asia                   | 117.5 (100.02-134.35) | 22.21 (18.57-25.75) | 285.34 (248.21-324.6)  | 21.56 (18.82-24.36) | -0.3 (-0.51 to -0.08)  |
| East Asia                    | 104.32 (92.79-116.88) | 13.28 (11.9-14.75)  | 209.29 (179.98-237.7)  | 11.55 (9.99-13.05)  | -0.21 (-0.32 to -0.1)  |
| Oceania                      | 0.62 (0.53-0.72)      | 20.82 (18.22-23.98) | 1.6 (1.32-1.93)        | 23.8 (20.26-27.96)  | 0.31 (0.12 to 0.49)    |
| Southeast Asia               | 68.7 (63.3-74.86)     | 27.38 (24.96-30.14) | 153.37 (137.32-169.64) | 27.79 (24.63-30.68) | 0.06 (0 to 0.12)       |
| Central Sub-Saharan Africa   | 6.45 (5.47-7.54)      | 30.32 (25.81-34.98) | 12.36 (9.7-15.19)      | 25.87 (19.78-31.73) | -0.64 (-0.68 to -0.61) |
| Eastern Sub-Saharan Africa   | 21.64 (19.01-24.17)   | 29.43 (25.56-33.33) | 38.6 (34.23-43.26)     | 26.24 (23.43-29.23) | -0.5 (-0.55 to -0.46)  |
| Southern Sub-Saharan Africa  | 6.18 (5.58-7.05)      | 23.04 (20.68-26.41) | 16.27 (14.95-17.65)    | 32.44 (29.77-35.1)  | 1.31 (0.95 to 1.66)    |
| Western Sub-Saharan Africa   | 27.27 (23.36-32.18)   | 31.88 (27.56-37.76) | 52.47 (44.11-61.28)    | 29.35 (25.21-33.71) | -0.21 (-0.25 to -0.17) |

149 SDI: sociodemographic index; ASDR: age-standardized death rate; EAPC: estimated annual  
 150 percentage change; UI: uncertainty interval; CI: confidence interval.

151

## 152 ***1.2 Changing trend of CKD-related death burden in each SDI region***

153 Of the total DALYs caused by CKD, which is consisted of years of life lost  
 154 prematurely (YLLs) and years lived with disability (YLDs), YLLs accounted for  
 155 78.9%, while YLDs accounted for 21.1% in 2019. Therefore, we focused subsequent  
 156 analyses mainly on the CKD-related death burden. During the three decades, all five  
 157 SDI regions showed increases in the numbers of deaths over time (figure 1b left).



1  
2  
3 158 Among them, the middle-SDI region showed the highest death numbers, reaching 0.5  
4 159 million, and the low-SDI region had the lowest, with 0.1 million, in 2019 (figure 1a  
5 160 and 1b left). The ASDR in the high-SDI region increased dramatically, with an EAPC  
6 161 of 1.2 (95% CI: 1.09 to 1.32), and exceeded that of the high-middle-SDI from 2011  
7 162 onward (figure 1b right). In contrast, the low-SDI region still had the highest ASDR  
8 163 in 2019, at 25.3 per 100,000 population (95% UI: 22.90-27.68), although it had the  
9 164 most significant declining trend (EAPC: -0.27, 95% CI: -0.31 to -0.22) (figure 1b  
10 165 right). The ASDR was negatively correlated with SDI level worldwide ( $\rho = -0.603$ ,  $P$   
11 166  $< 0.0001$ , figure 1c), while the ASIR was positively correlated with SDI level ( $\rho =$   
12 167  $0.54$ ,  $P < 0.0001$ , supplementary figure 4).

### 168 **1.3 The ASDR increased in most regions and countries**

169 At the regional level, death numbers in all 21 regions and the ASDRs in most regions  
170 showed increasing trends during this period (figure 1d). At the country level, CKD-  
171 related deaths increased by more than 500% in the United Arab Emirates, Venezuela,  
172 Estonia, Armenia, El Salvador and Ecuador over the three-decade study period  
173 (supplementary table 4). India (0.22 [95% UI: 0.19-0.26] million) surpassed inland  
174 China (0.2 [95% UI: 0.17-0.23] million) to be the largest number of CKD-related  
175 deaths in 2019. The number of deaths in the United States of America (0.11 [95% UI:  
176 0.10-0.11] million) was second to only those in India and China. The total number of  
177 deaths for these three countries accounted for 36.9% of the worldwide number of  
178 deaths in 2019 (figure 1e, supplementary figure 5). Nicaragua had the largest ASDR,  
179 at 80.2 (95% UI: 69.57-83.24) per 100,000 population (figure 1f, supplementary table  
180 4). Estonia showed the fastest increase in the ASDR with an EAPC of 5.4 (95% CI:  
181 4.91 to 5.81) during this period (figure 1g, supplementary table 4). While Mongolia  
182 had the fastest decrease in the ASDR of CKD (EAPC: -3.6, 95% UI: -4.07 to -3.12)  
183 (figure 1g, supplementary table 4).

## 184 **2. The CKD-related death burden in males was higher than that in females in** 185 **relatively high SDI regions**

### 186 **2.1 The CKD-related death burden was unbalanced between sexes at the SDI level**

187 Generally, the number of CKD-related deaths was larger in males than in females  
188 over the past 3 decades (figure 2a). At the SDI level, even though both showed  
189 increasing trends, the difference slightly narrowed with time, with the ratio of female  
190 deaths to male deaths changing from 0.915 in 1990 to 0.925 in 2019 (figure 2b). The  
191 ratio remained above 1 in the high-SDI region during this period. In 2019, the high-  
192 and high-middle-SDI regions had higher female death burdens, with ratios of female  
193 deaths to male deaths of 1.1 and 1.0, respectively, while the ratios in low- and low-  
194 middle-SDI regions were 0.802 and 0.812, which were the lowest (figure 2b left).  
195 Similar to the number of deaths, the CKD-related ASDR in males was higher than  
196 that in females over this period. In 2019, the female to male ASDR ratios ranged from  
197 0.6 to 0.8 in all the SDI regions (figure 2b right), suggesting that the CKD-related  
198 death burden was unbalanced between sexes.

### 199 **2.2 The ASDR in males increased in most regions and countries**

1  
2  
3 200 At the regional level, the female to male deaths ratios in Eastern Europe was the  
4 201 highest (1.3), and that in Oceania was the lowest (0.7) in 2019. Death cases of both  
5 202 sexes were mainly concentrated in Asia. Both male and female deaths in Latin  
6 203 America had the fastest increase over time. In contrast, female death numbers in  
7 204 Eastern Europe and male death numbers in Central Europe had the slowest increases  
8 205 (figure 2c, supplementary table 5). Unlike the number of deaths, the female to male  
9 206 ASDR ratios in most regions were less than 1.0, except in North Africa and Middle  
10 207 East (1.0). The ratio in Southern sub-Saharan Africa was the lowest, at 0.6  
11 208 (supplementary table 5).

12 209 At the country level, the numbers of male deaths in almost all the countries showed  
13 210 increasing trends, except in Slovakia and Poland. The death ratios in Estonia,  
14 211 Hungary, Latvia, Austria and Vietnam were over 1.5, which suggested that the CKD-  
15 212 related death burden was much higher in women than in men in these countries. In  
16 213 contrast, the ratio was less than 0.5 in Papua New Guinea and the United Arab  
17 214 Emirates, indicating a higher death burden in men (figure 2d, supplementary table 6).  
18 215 The ASDRs in both females and males in Mongolia showed the largest decreases,  
19 216 with decreases of 43.2% in females and 57.1% in males.

### 217 **3. The age-related CKD-related death burden is more serious in high-SDI** 218 **regions**

#### 219 ***3.1 The numbers of CKD-related death increased with age in 2019***

220 In 2019, global CKD-related deaths were mainly distributed in middle-aged and  
221 elderly people over 50 years old, specifically 50-74 years old, who accounted for  
222 41.9% (figure 3a). Those aged 50-74 years had the largest death numbers in all the  
223 SDI regions except high-SDI region. In high-SDI region, the numbers of CKD-related  
224 death were increased with age, with the largest in 85 plus age group. The numbers of  
225 deaths in the 85 plus age group had the greatest increases in all SDI regions (figure  
226 3a). Those aged 0-9 years showed decreases in the numbers of deaths in all the SDI  
227 regions except the low-SDI region. Those aged 10-24 years had increased numbers of  
228 deaths in the low- and low-middle-SDI regions (figure 3b). Therefore, premature  
229 deaths were mainly concentrated in the relatively lower SDI regions in 2019.

#### 230 ***3.2 The changing trend of CKD-related death burden from 1990 to 2019 in each*** 231 ***SDI regions***

232 During this period, the age distribution of CKD-related deaths in the relatively young  
233 population, including the 0-9, 10-24 and 25-49, and 50-74 age groups, showed a  
234 declining trend (figure 3c). In contrast, deaths in elderly individuals, particularly those  
235 aged 85 years and older, showed an upward trend. Central Asia was the only region  
236 that saw a decline composition of 85 plus age group (figure 3c). As to SDI level, the  
237 proportion of deaths the 85 plus age group showed an upward trend with increasing  
238 SDI level, with the highest value of 58.2% in the Western Europe region in 2019.  
239 Eastern sub-Saharan Africa and Western sub-Saharan Africa, with lower SDI levels,  
240 had the highest proportions of the 10-24 and 0-9 age groups, respectively. The high-  
241 income Asia Pacific region had the largest increase in the proportion among the 85

242 plus age group and the largest decrease among the 50-74 age group (figure 3c). These  
243 results revealed that the CKD-related death burden gradually shifted to elderly  
244 individuals in higher SDI regions. In addition, the proportion of females increased  
245 with increasing age was found in the further analysis of sex compositions among  
246 different age groups (figure 3d).

#### 247 **4. CKD Burden attributable to risk factors**

##### 248 ***4.1 The main risk factors for death from CKD***

249 Globally, metabolic disorders (such as diabetes, obesity and hypertension) were the  
250 main risk factors for death from CKD. Over this period, the numbers of deaths due to  
251 CKD attributable to high systolic blood pressure (SBP), high fasting plasma glucose  
252 (FPG) and high body mass index (BMI) sharply increased (figure 4a), which were the  
253 main risk factors contributing to the ASDR of CKD, accounting for 62.0%, 33.6%  
254 and 27.2%, respectively in 2019. Even though the ASDR of CKD attributable to high  
255 BMI had the largest increase, at 77.1%, compared with 17.6% for high SBP and  
256 20.4% for high FPG, the ranks of these risk factors did not change (figure 4a).

##### 257 ***4.2 The high SBP-attributed ASDRs in all five SDI regions***

258 CKD attributable to high SBP was associated with the highest ASDRs in all the SDI  
259 regions over this period (figure 4a). In 2019, high SBP-attributed death rate in the  
260 low-SDI region was higher than in other SDI-regions (figure 4b), even though it  
261 showed the greatest reduction during the 30-year study period (decrease of 3.0%). The  
262 high SBP-attributed death rate in the high-SDI region saw the fastest increase (figure  
263 4b). In 2019, ASDR attributed to high SBP in the high-middle-SDI region was the  
264 lowest. At the regional level, the rank of the high SBP-attributed ASDR in Central  
265 Latin America increased from sixth in 1990 to first among all 21 regions in 2019, with  
266 the greatest increase.

##### 267 ***4.3 Other metabolic disorders factors for CKD-related ASDR in each SDI regions***

268 The highest FPG-attributed ASDRs were mainly concentrated in the low-middle and  
269 low-SDI regions during this period (figure 4b). In 2019, high FPG was the second  
270 most prevalent risk factor, followed by high BMI, in all regions except the high-SDI  
271 region (figure 4a, c). In contrast, BMI was ranked as the second most prevalent  
272 contributor, exceeding FPG, to the ASDR in the high-SDI region in 2019, even  
273 though the FPG-attributed death rate in this region showed a larger increase than  
274 those in other regions (figure 4b, c). In 2019, the FPG-attributed ASDR in the middle-  
275 SDI region was higher than those in the other SDI regions, while that in the high-  
276 middle-SDI region was the lowest (figure 4b). The BMI-attributed ASDR in the  
277 middle-SDI was the highest, while in the high-middle SDI, it was the lowest. It is  
278 worth noting that the BMI-attributed ASDRs in all five SDI regions had steeply  
279 increasing trends over this period (figure 4b). A diet high in sodium was the fourth-  
280 ranked contributor to the CKD ASDR in the high-middle-, middle- and low-middle-  
281 SDI regions and the fifth-ranked contributor in the high- and low-SDI regions (figure  
282 4a).

##### 283 ***4.4 The changing trends of ASDRs caused by high or low temperature in different***

1  
2  
3 284 **areas**

4 285 Notably, although the high temperature-related death burden was low (figure 4c), the  
5 286 high temperature-attributed ASDRs increased steeply in the low-middle- and low-SDI  
6 287 regions over this period (figure 4b). These regions had the highest high temperature-  
7 288 attributed ASDRs in 2019 (figure 4c). In sharp contrast, the high temperature-  
8 289 attributed ASDRs in the high-middle- and high-SDI regions decreased by 7.6 and 6.6  
9 290 times, respectively, compared with those in 1990 (figure 4b). The high-middle-SDI  
10 291 region had the lowest high temperature-related death rate in 2019. At the regional  
11 292 level, East Asia, High-income North America, South Asia and Western Europe  
12 293 showed the fastest increases in the high temperature-attributed ASDRs, and South  
13 294 Asia had the highest high temperature-attributed death rate in 2019. Central Latin  
14 295 America and Southeast Asia had the fastest decreases in the high temperature-  
15 296 attributed ASDR. Tropical Latin America, Southern sub-Saharan Africa and Eastern  
16 297 sub-Saharan Africa had the lowest values. In addition, the risk factors of low  
17 298 temperature and lead exposure were much larger than those of high temperature, and  
18 299 low temperature exposure was the first of the three in high- and high-middle-SDI  
19 300 regions (figure 4a).

20 301

21 302 **DISCUSSION**

22 303 Despite advancements in scientific research that have led to a better understanding of  
23 304 the pathogenesis of diseases and significant improvements in disease management, no  
24 305 significant improvement was observed in the burden of CKD-related deaths, in  
25 306 contrast with other noncommunicable diseases. CKD is characterized by a gradual  
26 307 decline kidney function that eventually results in end-stage renal disease (ESRD),  
27 308 with little chance of reversal. CKD is therefore an important cause of morbidity and  
28 309 mortality among noncommunicable diseases.[17]

29 310 Our results showed significant regional variations in the CKD-related death burdens.  
30 311 The ASDR of CKD was associated with SDI, with higher CKD ASDRs in lower SDI  
31 312 regions. This may be related to a lack of effective health interventions caused by  
32 313 inadequate health care funding and weak health systems in lower SDI regions.[18] If  
33 314 these trends continue, differences in the CKD death burden among regions will  
34 315 increase further. In terms of geographical regions and countries, the CKD death  
35 316 burden in Mesoamerica (especially Nicaragua, El Salvador and Mexico) was more  
36 317 serious than those in other geographical locations. This may be due to the  
37 318 megathermal climate or the rates of diabetes and hypertension, which are major risk  
38 319 factors globally.[19] A recent study revealed that agricultural workers who currently  
39 320 or used to work in the sugarcane industry may be at high-risk of CKD.[19, 20] In  
40 321 addition, climate change in this region may be a risk factor for CKD-related  
41 322 death.[21] These findings call for increased government planning and interventions  
42 323 and the development of new and more appropriate solutions to address the CKD death  
43 324 burden in this area.

44 325 Globally, the number of CKD-related deaths and ASDR were larger and higher in



1  
2  
3 326 males than in females, but the difference narrowed over time. It is worth noting that  
4 327 the sex ratio of deaths in the high-SDI region remained above 1 during the study  
5 328 period, but the ASDR ratio did not, which may be attributed to the increase in the  
6 329 population and the aging of the population in this region, especially among females.  
7 330 In contrast, the sex ratio of the ASDR was higher than the ratio of deaths in several  
8 331 countries in the Middle East, such as Egypt (1.60 vs. 1.13 in Egypt). This result  
9 332 coincided with the lower disability-free life expectancy among women's total lifetime  
10 333 in this region.[22]

11 334 Over the past 30 years, the age distribution of CKD-related deaths showed a gradual  
12 335 increasing trend with age, and people in the middle-aged and elderly groups (> 50  
13 336 years old) accounted for the main proportion of CKD deaths. This trend may be  
14 337 closely related to improvements in health care as well as population aging worldwide.  
15 338 However, in regions with relatively low SDIs, such as Africa, premature deaths are  
16 339 still prevalent, with increasing numbers, which may be explained by the low levels of  
17 340 medical and health care in these regions. Patients diagnosed with CKD may not  
18 341 receive timely and adequate medical care to slow the progression of renal  
19 342 deterioration, resulting in premature death, which reflects the impact of  
20 343 socioeconomic development on premature CKD-related deaths.[23] Therefore, policy  
21 344 makers and the health care sector in these regions should implement urgent measures  
22 345 to reverse this negative trend.

23 346 The most cost-effective strategy to reduce the number of CKD-related deaths is  
24 347 preventing the onset of CKD.[24] Therefore, screening high-risk groups and  
25 348 developing interventions targeting a variety of risk factors are the most effective  
26 349 approaches.[24, 25] High SBP, FPG and BMI were the main risk factors for CKD-  
27 350 related death.[1, 7, 26] Hence, implementing measures to improve blood pressure,  
28 351 plasma glucose and body weight is critical for reducing the CKD burden.[27]

29 352 Although the CKD-related death burden attributed to high temperature exposure was  
30 353 low, the rapid upward trend, especially in the low- and low-middle-SDI regions,  
31 354 should be noted. In contrast, this burden in the high- and high-middle-SDI regions  
32 355 tended to remain stable or even decreased. Some studies recently reported large  
33 356 numbers of young sugarcane workers with end-stage of CKD, who did not have any  
34 357 known risk factors for CKD, such as high blood pressure or diabetes before.[19]  
35 358 Subsequent reports found that CKD of unknown origin also occurred in people who  
36 359 worked in agriculture or construction in other low-socioeconomic areas.[28] It has  
37 360 already been the leading cause of hospitalization and death among CKD patients in  
38 361 Central America.[29] Even though the exact pathogenesis of CKD in these individuals  
39 362 is currently unknown, it is undoubtedly related to heat exposure and dehydration  
40 363 caused by rapidly changing environmental conditions.[28, 30, 31] Compared with the  
41 364 higher SDI regions, the ability to provide health care and adapt to climate change in  
42 365 relative lower regions were limited; therefore, the situation is severely affected by  
43 366 high temperature exposure and is getting worse.[31] Local governments should  
44 367 formulate effective measures to cope with the high-temperature environment and

368 formulate strategies to mitigate climate change. Moreover, cooperation among  
369 clinicians, public health personnel, government agencies and medical researchers  
370 should be promoted to raise public awareness of CKD, actively explore the specific  
371 mechanism of the influence of high temperature exposure on CKD and minimize the  
372 adverse effects of climate change on kidney health.

373 Additionally, it has been shown that the association between cold exposure promoting  
374 CKD-related hospital visits is stronger than at moderate and high temperatures.[32]  
375 And acute cold exposure can lead to a significant increase in arterial blood pressure in  
376 patients with or without comorbid CKD.[33] Therefore, avoiding acute cold exposure  
377 and enhancing warmth measures in cold exposure are particularly important.  
378 Environmental lead exposure increases the risk of CKD.[34, 35] Due to the  
379 prevalence of lead in the environment, human exposure to this metal is almost  
380 inevitable. Therefore, public measures to reduce environmental contamination and  
381 reduce the food chain transfer of lead are essential, as are measures to reduce risk by  
382 setting maximum allowable concentrations of lead in staple foods at the lowest  
383 achievable levels.

#### 384 **Limitations**

385 The GBD database provides extensive data and estimates of risk factors for the global  
386 burden of CKD, but there are some limitations, which have been detailed in many  
387 previously published studies.[13] First, more detailed information about the included  
388 countries and regions could not be obtained from the GBD database. In some  
389 countries with large territory spans or with multinational populations, the impact of  
390 regional and ethnic differences within countries on the global burden of CKD could  
391 not be further analyzed. In addition, the CKD burden may be underestimated in less  
392 developed countries and areas due to limited access to health care. Moreover, data on  
393 the impact of metabolic factors other than blood pressure and blood glucose, such as  
394 triglycerides, cholesterol or uric acid, on the global burden of CKD are lacking.

#### 395 **CONCLUSIONS**

396 In summary, CKD remains a critical global public health concern. CKD-related  
397 deaths continue to increase, with the majority now occurring in elderly adults, mainly  
398 due to the increase in and the aging of the global population. However, the numbers  
399 of premature deaths in regions with low-SDI levels remain high, and the trend is  
400 increasing. In addition, the burden of CKD-related deaths is more severe in men than  
401 in women, though this difference is likely to narrow over time. Hypertension, diabetes  
402 and obesity remain critical risk factors for CKD. Moreover, in the low-SDI region, the  
403 rapidly increasing number of CKD-related deaths attributed to high temperature  
404 exposure should not be ignored, and national-level measures should be taken to  
405 reverse this trend.

#### 406 **Acknowledgments**

407 Authors appreciate all the collaborators involved in the GBD study 2019.

#### 408 **Competing interests**

409 No competing interests to declare.

1  
2  
3 410 **Contributors**

4 411 The idea and conceptual design: YL and XS; Data acquisition: ZC and NH; Literature  
5 412 retrieval and data collation: XL and XF; Data analysis: ZC and JL; Visualization: XL  
6 413 and YL; Preparation of the original draft: ZC and NH; Manuscript editing and  
7 414 revising: YL, XF and XS. Authors confirm that all of them have full access to all the  
8 415 data of the present study and are responsible for submitting for publication.

9 416 **Funding**

10 417 This work was supported by the National Natural Science Foundation of China (Grant  
11 418 No. 82000755) and the Nature Science Foundation of Shandong Province (Grant No.  
12 419 ZR2020QH086).

13 420 **Ethics approval**

14 421 Not applicable. Data of this study was publicly available and no patient and animal  
15 422 was involved.

16 423 **Data sharing statement**

17 424 Data are available in a public, open access repository. Data used from the online  
18 425 database the Global Health Data Exchange (GHDx) query tool  
19 426 (<http://ghdx.healthdata.org/gbd-results-tool>).[11]  
20 427

428 **REFERENCES**

- 429 1 Collaboration GCKD. Global, regional, and national burden of chronic  
430 kidney disease, 1990–2017: a systematic analysis for the Global  
431 Burden of Disease Study 2017. *Lancet* 2020;395:709–33. doi:  
432 10.1016/s0140-6736(20)30045-3
- 433 2 Hockham C, Schanschieff F, Woodward M. Sex Differences in CKD-  
434 Associated Mortality From 1990 to 2019: Data From the Global Burden  
435 of Disease Study. *Kidney Medicine* 2022;4doi:  
436 10.1016/j.xkme.2022.100535
- 437 3 Levey AS, Atkins R, Coresh J, et al. Chronic kidney disease as a  
438 global public health problem: approaches and initiatives - a position  
439 statement from Kidney Disease Improving Global Outcomes. *Kidney Int*  
440 2007;72:247–59. doi: 10.1038/sj.ki.5002343
- 441 4 Dai H, Alsalhe TA, Chalghaf N, et al. The global burden of disease  
442 attributable to high body mass index in 195 countries and territories,  
443 1990–2017: An analysis of the Global Burden of Disease Study.  
444 2020;17:e1003198. doi: 10.1371/journal.pmed.1003198
- 445 5 Kovács N, Nagy A, Dombrádi V, et al. Inequalities in the Global  
446 Burden of Chronic Kidney Disease Due to Type 2 Diabetes Mellitus:  
447 An Analysis of Trends from 1990 to 2019. 2021;18doi:  
448 10.3390/ijerph18094723
- 449 6 Campbell JR, Johnston JC, Ronald LA, et al. Screening for Latent  
450 Tuberculosis Infection in Migrants With CKD: A Cost-effectiveness  
451 Analysis. *Am J Kidney Dis* 2019;73:39–50. doi:  
452 10.1053/j.ajkd.2018.07.014
- 453 7 Chen A, Zou M, Young CA, et al. Disease Burden of Chronic Kidney  
454 Disease Due to Hypertension From 1990 to 2019: A Global Analysis.  
455 *Front Med (Lausanne)* 2021;8:690487. doi: 10.3389/fmed.2021.690487
- 456 8 Xie Y, Bowe B, Mokdad AH, et al. Analysis of the Global Burden of  
457 Disease study highlights the global, regional, and national  
458 trends of chronic kidney disease epidemiology from 1990 to 2016.  
459 *Kidney Int* 2018;94:567–81. doi: 10.1016/j.kint.2018.04.011
- 460 9 Norhammar A, Bodegard J, Eriksson JW, et al. Cost of healthcare  
461 utilization associated with incident cardiovascular and renal  
462 disease in individuals with type 2 diabetes: a multinational,  
463 observational study across 12 countries. 2022doi: 10.1111/dom.14698
- 464 10 Garofalo C, Borrelli S, Provenzano M, et al. Dietary Salt  
465 Restriction in Chronic Kidney Disease: A Meta-Analysis of  
466 Randomized Clinical Trials. 2018;10doi: 10.3390/nu10060732
- 467 [dataset]11 Collaboration GCKD. Data from the online database the  
468 Global Health Data Exchange (GHDx) query tool. Global Health Data



- 1  
2  
3 469 Exchange. December 31, 2019. [http://ghdx.healthdata.org/gbd-](http://ghdx.healthdata.org/gbd-results-tool)  
4 470 [results-tool](http://ghdx.healthdata.org/gbd-results-tool)  
5  
6 471 12 Global burden of 369 diseases and injuries in 204 countries and  
7 472 territories, 1990–2019: a systematic analysis for the Global Burden  
8 473 of Disease Study 2019. *Lancet* 2020;396:1204–22. doi: 10.1016/s0140-  
9 474 6736(20)30925–9  
10  
11 475 13 Global burden of 87 risk factors in 204 countries and territories,  
12 476 1990–2019: a systematic analysis for the Global Burden of Disease  
13 477 Study 2019. *Lancet* 2020;396:1223–49. doi: 10.1016/s0140-  
14 478 6736(20)30752–2  
15  
16 479 14 Global age-sex-specific fertility, mortality, healthy life  
17 480 expectancy (HALE), and population estimates in 204 countries and  
18 481 territories, 1950–2019: a comprehensive demographic analysis for  
19 482 the Global Burden of Disease Study 2019. *Lancet* 2020;396:1160–203.  
20 483 doi: 10.1016/s0140-6736(20)30977–6  
21  
22 484 15 Liu Z, Jiang Y, Yuan H, et al. The trends in incidence of primary  
23 485 liver cancer caused by specific etiologies: Results from the Global  
24 486 Burden of Disease Study 2016 and implications for liver cancer  
25 487 prevention. *J Hepatol* 2019;70:674–83. doi:  
26 488 10.1016/j.jhep.2018.12.001  
27  
28 489 16 Wang W, Hu M, Liu H, et al. Global Burden of Disease Study 2019  
29 490 suggests that metabolic risk factors are the leading drivers of the  
30 491 burden of ischemic heart disease. *Cell Metab* 2021;33:1943–56. e2.  
31 492 doi: 10.1016/j.cmet.2021.08.005  
32  
33 493 17 Stanifer JW, Von Isenburg M, Chertow GM, et al. Chronic kidney  
34 494 disease care models in low- and middle-income countries: a  
35 495 systematic review. *BMJ Glob Health* 2018;3:e000728. doi:  
36 496 10.1136/bmjgh-2018-000728  
37  
38 497 18 Ameh OI, Ekrikpo UE, Kengne AP. Preventing CKD in Low- and Middle-  
39 498 Income Countries: A Call for Urgent Action. *Kidney Int Rep*  
40 499 2020;5:255–62. doi: 10.1016/j.ekir.2019.12.013  
41  
42 500 19 Ferguson R, Leatherman S, Fiore M, et al. Prevalence and Risk  
43 501 Factors for CKD in the General Population of Southwestern Nicaragua.  
44 502 *J Am Soc Nephrol* 2020;31:1585–93. doi: 10.1681/asn.2019050521  
45  
46 503 20 Hansson E, Mansourian A, Farnaghi M, et al. An ecological study of  
47 504 chronic kidney disease in five Mesoamerican countries: associations  
48 505 with crop and heat. *BMC Public Health* 2021;21:840. doi:  
49 506 10.1186/s12889-021-10822-9  
50  
51 507 21 Sasai F, Roncal-Jimenez C, Rogers K, et al. Climate Change and  
52 508 Nephrology. *Nephrol Dial Transplant* 2021doi: 10.1093/ndt/gfab258  
53  
54 509 22 Metwally S. Disability-free life expectancy at old ages in Egypt.  
55 510 *J Biosoc Sci* 2021;53:290–304. doi: 10.1017/s0021932020000218  
56  
57  
58  
59  
60

- 1  
2  
3 511 23 Bello AK, Levin A, Tonelli M, et al. Assessment of Global Kidney  
4 512 Health Care Status. *Jama* 2017;317:1864–81. doi:  
5 513 10.1001/jama.2017.4046  
6  
7 514 24 Komenda P, Ferguson TW, Macdonald K, et al. Cost-effectiveness of  
8 515 primary screening for CKD: a systematic review. *Am J Kidney Dis*  
9 516 2014;63:789–97. doi: 10.1053/j.ajkd.2013.12.012  
10  
11 517 25 Cardiovascular disease, chronic kidney disease, and diabetes  
12 518 mortality burden of cardiometabolic risk factors from 1980 to 2010:  
13 519 a comparative risk assessment. *Lancet Diabetes Endocrinol*  
14 520 2014;2:634–47. doi: 10.1016/s2213–8587(14)70102–0  
15  
16 521 26 Li H, Lu W, Wang A, et al. Changing epidemiology of chronic kidney  
17 522 disease as a result of type 2 diabetes mellitus from 1990 to 2017:  
18 523 Estimates from Global Burden of Disease 2017. *J Diabetes Investig*  
19 524 2021;12:346–56. doi: 10.1111/jdi.13355  
20  
21 525 27 Ene-Iordache B, Perico N, Bikbov B, et al. Chronic kidney disease  
22 526 and cardiovascular risk in six regions of the world (ISN-KDDC): a  
23 527 cross-sectional study. *Lancet Glob Health* 2016;4:e307–19. doi:  
24 528 10.1016/s2214–109x(16)00071–1  
25  
26 529 28 Johnson RJ, Wesseling C, Newman LS. Chronic Kidney Disease of  
27 530 Unknown Cause in Agricultural Communities. *N Engl J Med*  
28 531 2019;380:1843–52. doi: 10.1056/NEJMra1813869  
29  
30 532 29 Sorensen C, Garcia-Trabanino R. A New Era of Climate Medicine –  
31 533 Addressing Heat-Triggered Renal Disease. *N Engl J Med* 2019;381:693–  
32 534 96. doi: 10.1056/NEJMp1907859  
33  
34 535 30 Harries AD. Chronic kidney disease, tuberculosis and climate change.  
35 536 *Int J Tuberc Lung Dis* 2020;24:132–33. doi: 10.5588/ijtld.19.0556  
36  
37 537 31 Borg MA, Bi P. The impact of climate change on kidney health. *Nat*  
38 538 *Rev Nephrol* 2021;17:294–95. doi: 10.1038/s41581–020–00365–4  
39  
40 539 32 Wu J, Ye Q, Fang L, et al. Short-term association of NO<sub>2</sub> with  
41 540 hospital visits for chronic kidney disease and effect modification  
42 541 by temperature in Hefei, China: A time series study. *Ecotoxicol*  
43 542 *Environ Saf* 2022;237:113505. doi: 10.1016/j.ecoenv.2022.113505  
44  
45 543 33 Masajtis-Zagajewska A, Pawlowicz E, Nowicki M. Effect of Short-Term  
46 544 Cold Exposure on Central Aortic Blood Pressure in Patients with  
47 545 CKD. *Nephron* 2021;145:20–26. doi: 10.1159/000510365  
48  
49 546 34 Navas-Acien A, Tellez-Plaza M, Guallar E, et al. Blood cadmium and  
50 547 lead and chronic kidney disease in US adults: a joint analysis. *Am*  
51 548 *J Epidemiol* 2009;170:1156–64. doi: 10.1093/aje/kwp248  
52  
53 549 35 Ekong EB, Jaar BG, Weaver VM. Lead-related nephrotoxicity: a review  
54 550 of the epidemiologic evidence. *Kidney Int* 2006;70:2074–84. doi:  
55 551 10.1038/sj.ki.5001809  
56  
57  
58  
59  
60

1  
2  
3  
4  
5  
6  
7  
8  
9  
10  
11  
12  
13  
14  
15  
16  
17  
18  
19  
20  
21  
22  
23  
24  
25  
26  
27  
28  
29  
30  
31  
32  
33  
34  
35  
36  
37  
38  
39  
40  
41  
42  
43  
44  
45  
46  
47  
48  
49  
50  
51  
52  
53  
54  
55  
56  
57  
58  
59  
60

553

For peer review only

1  
2  
3 554 **Figure legends**  
4

5  
6 555 **figure 1.** Global death cases and death rate of CKD from 1990 to 2019. (A) Death  
7 556 cases in global and SDI areas in 1990 and 2019. (B) Death cases and ASDRs in global  
8 557 and SDI areas from 1990 to 2019. (C) Relationship between ASDRs and SDI from  
9 558 1990 to 2019. (D) Death cases and ASDRs in 21 geographic regions from 1990 to  
10 559 2019. (E) Death cases in 204 countries and territories in 2019. (F) The ASDRs in 204  
11 560 countries and territories in 1990 and 2019. (G) The EAPCs of ASDRs in 204  
12 561 countries and territories from 1990 to 2019. ASDR, age-standardized death rate (per  
13 562 100,000 population).

14  
15  
16  
17 563 **figure 2.** Sex differences and trends of CKD deaths and ASDR from 1990 to 2019.  
18 564 (A) The ASDRs in males and females globally from 1990 to 2019. (B) Death cases  
19 565 ratio between females to males (left) and ASDR ratio between females to males  
20 566 (right), in global and SDI areas in 1990 and 2019. (C) Gender composition of death  
21 567 cases and ASDR in global and SDI areas in 1990 and 2019. (D) Death cases ratio  
22 568 between females to males (left) and ASDR ratio between females to males (right) in  
23 569 204 countries and territories in 2019. ASDR, age-standardized death rate (per 100,000  
24 570 population).

25  
26  
27  
28  
29 571 **figure 3.** The distribution of CKD death cases and rates in age groups, SDI areas and  
30 572 21 geographic regions from 1990 to 2019. (A) Death cases in age groups in global and  
31 573 SDI areas from 1990 to 2019. (B) The change percentage of death cases (right) and  
32 574 rate (left) in age groups from 1990 to 2019. (C) Six age groups as percentages of total  
33 575 deaths in global, SDI areas and 21 geographic regions in 1990 and 2019. (D) Gender  
34 576 composition of death in global and SDI areas in 2019.

35  
36  
37  
38 577 **figure 4.** Predominant contribution of risk factors to CKD-related deaths in global and  
39 578 SDI areas. (A) Death cases and ASDRs attributed to main risk factors by SDI region  
40 579 from 1990 to 2019. (B) The ASDRs trends in SDI regions attributed to each main risk  
41 580 factor. (C) Proportions of deaths in global and SDI regions attributed to each risk  
42 581 factors in 2019. ASDR, age-standardized death rate (per 100,000 population).

43  
44  
45  
46 582  
47  
48  
49  
50  
51  
52  
53  
54  
55  
56  
57  
58  
59  
60



1  
2  
3  
4  
5  
6  
7  
8  
9  
10  
11  
12  
13  
14  
15  
16  
17  
18  
19  
20  
21  
22  
23  
24  
25  
26  
27  
28  
29  
30  
31  
32  
33  
34  
35  
36  
37  
38  
39  
40  
41  
42  
43  
44  
45  
46  
47  
48  
49  
50  
51  
52  
53  
54  
55  
56  
57  
58  
59  
60

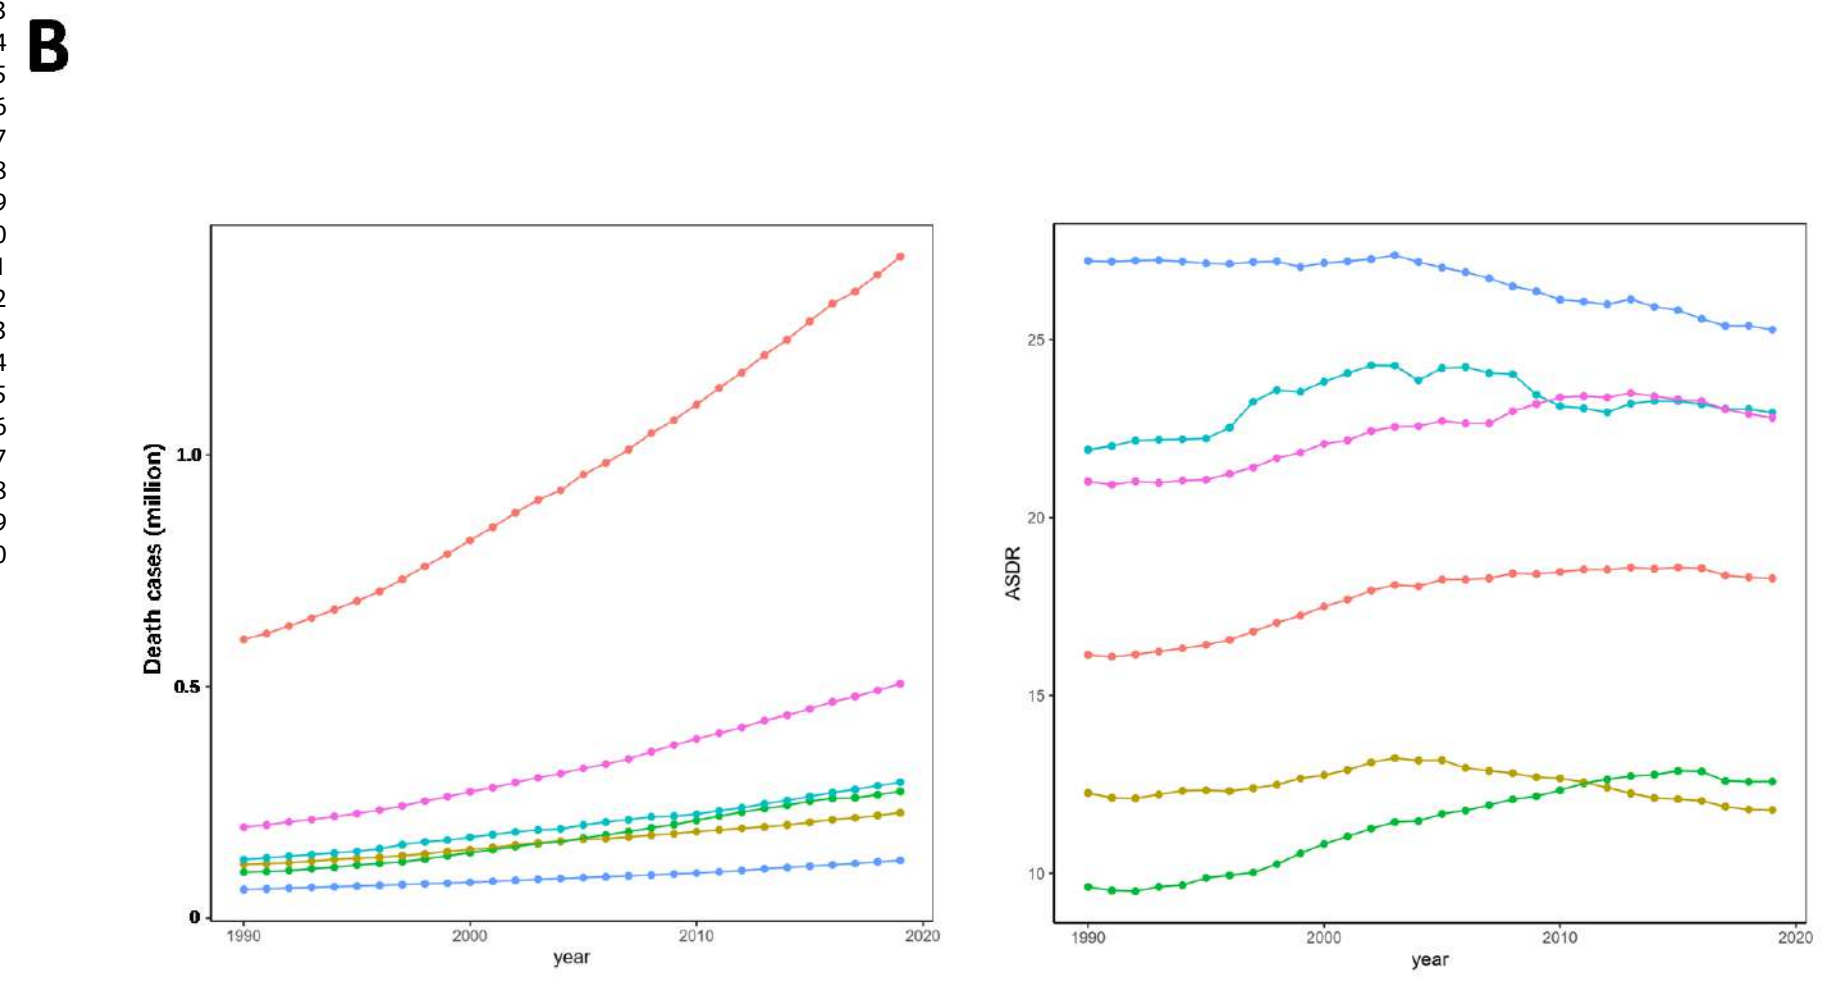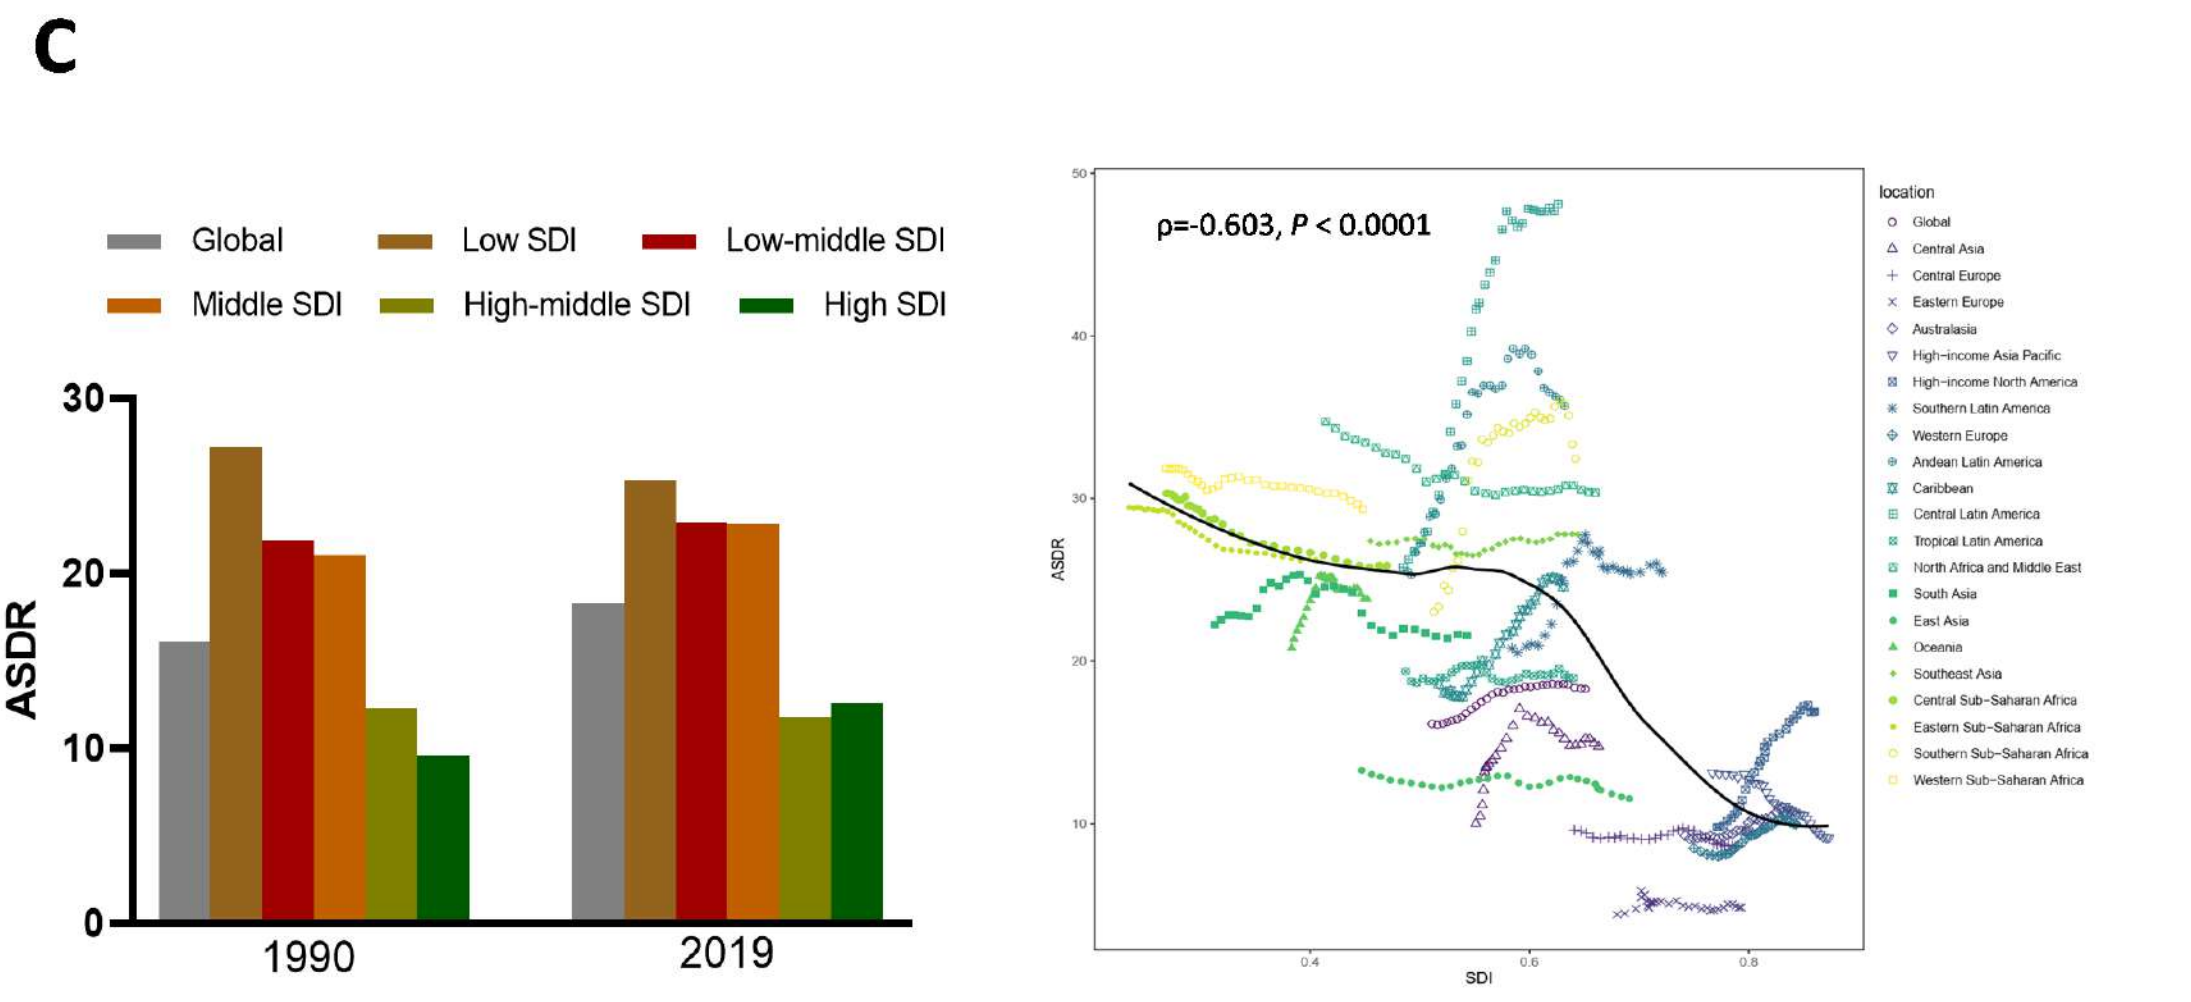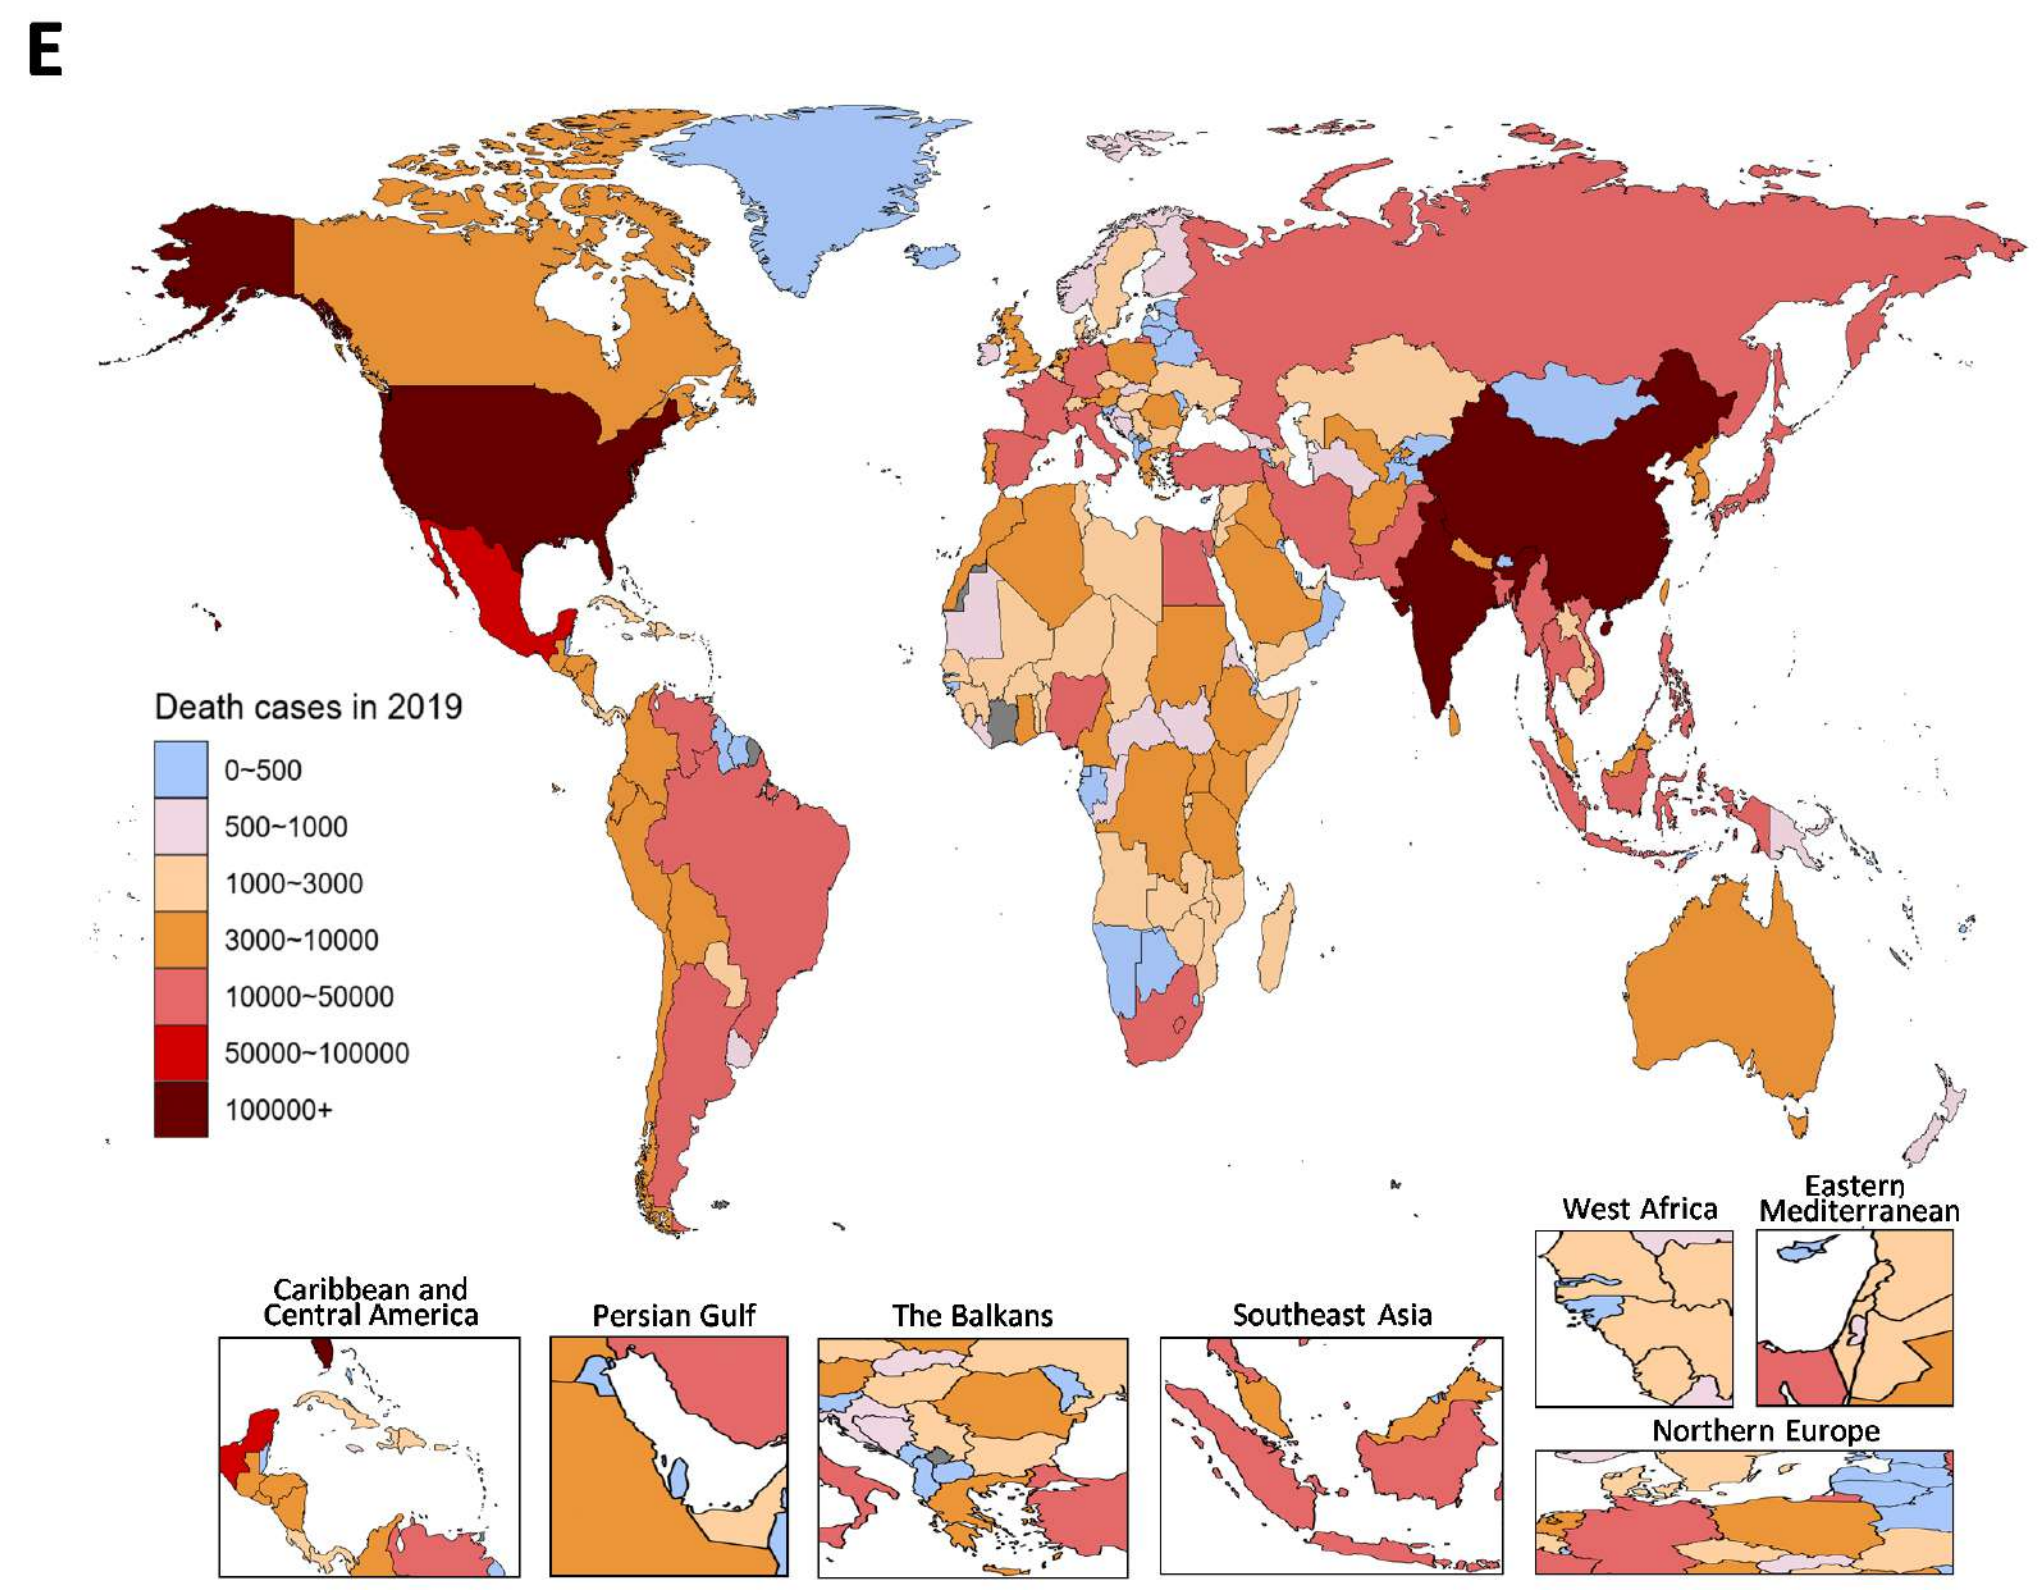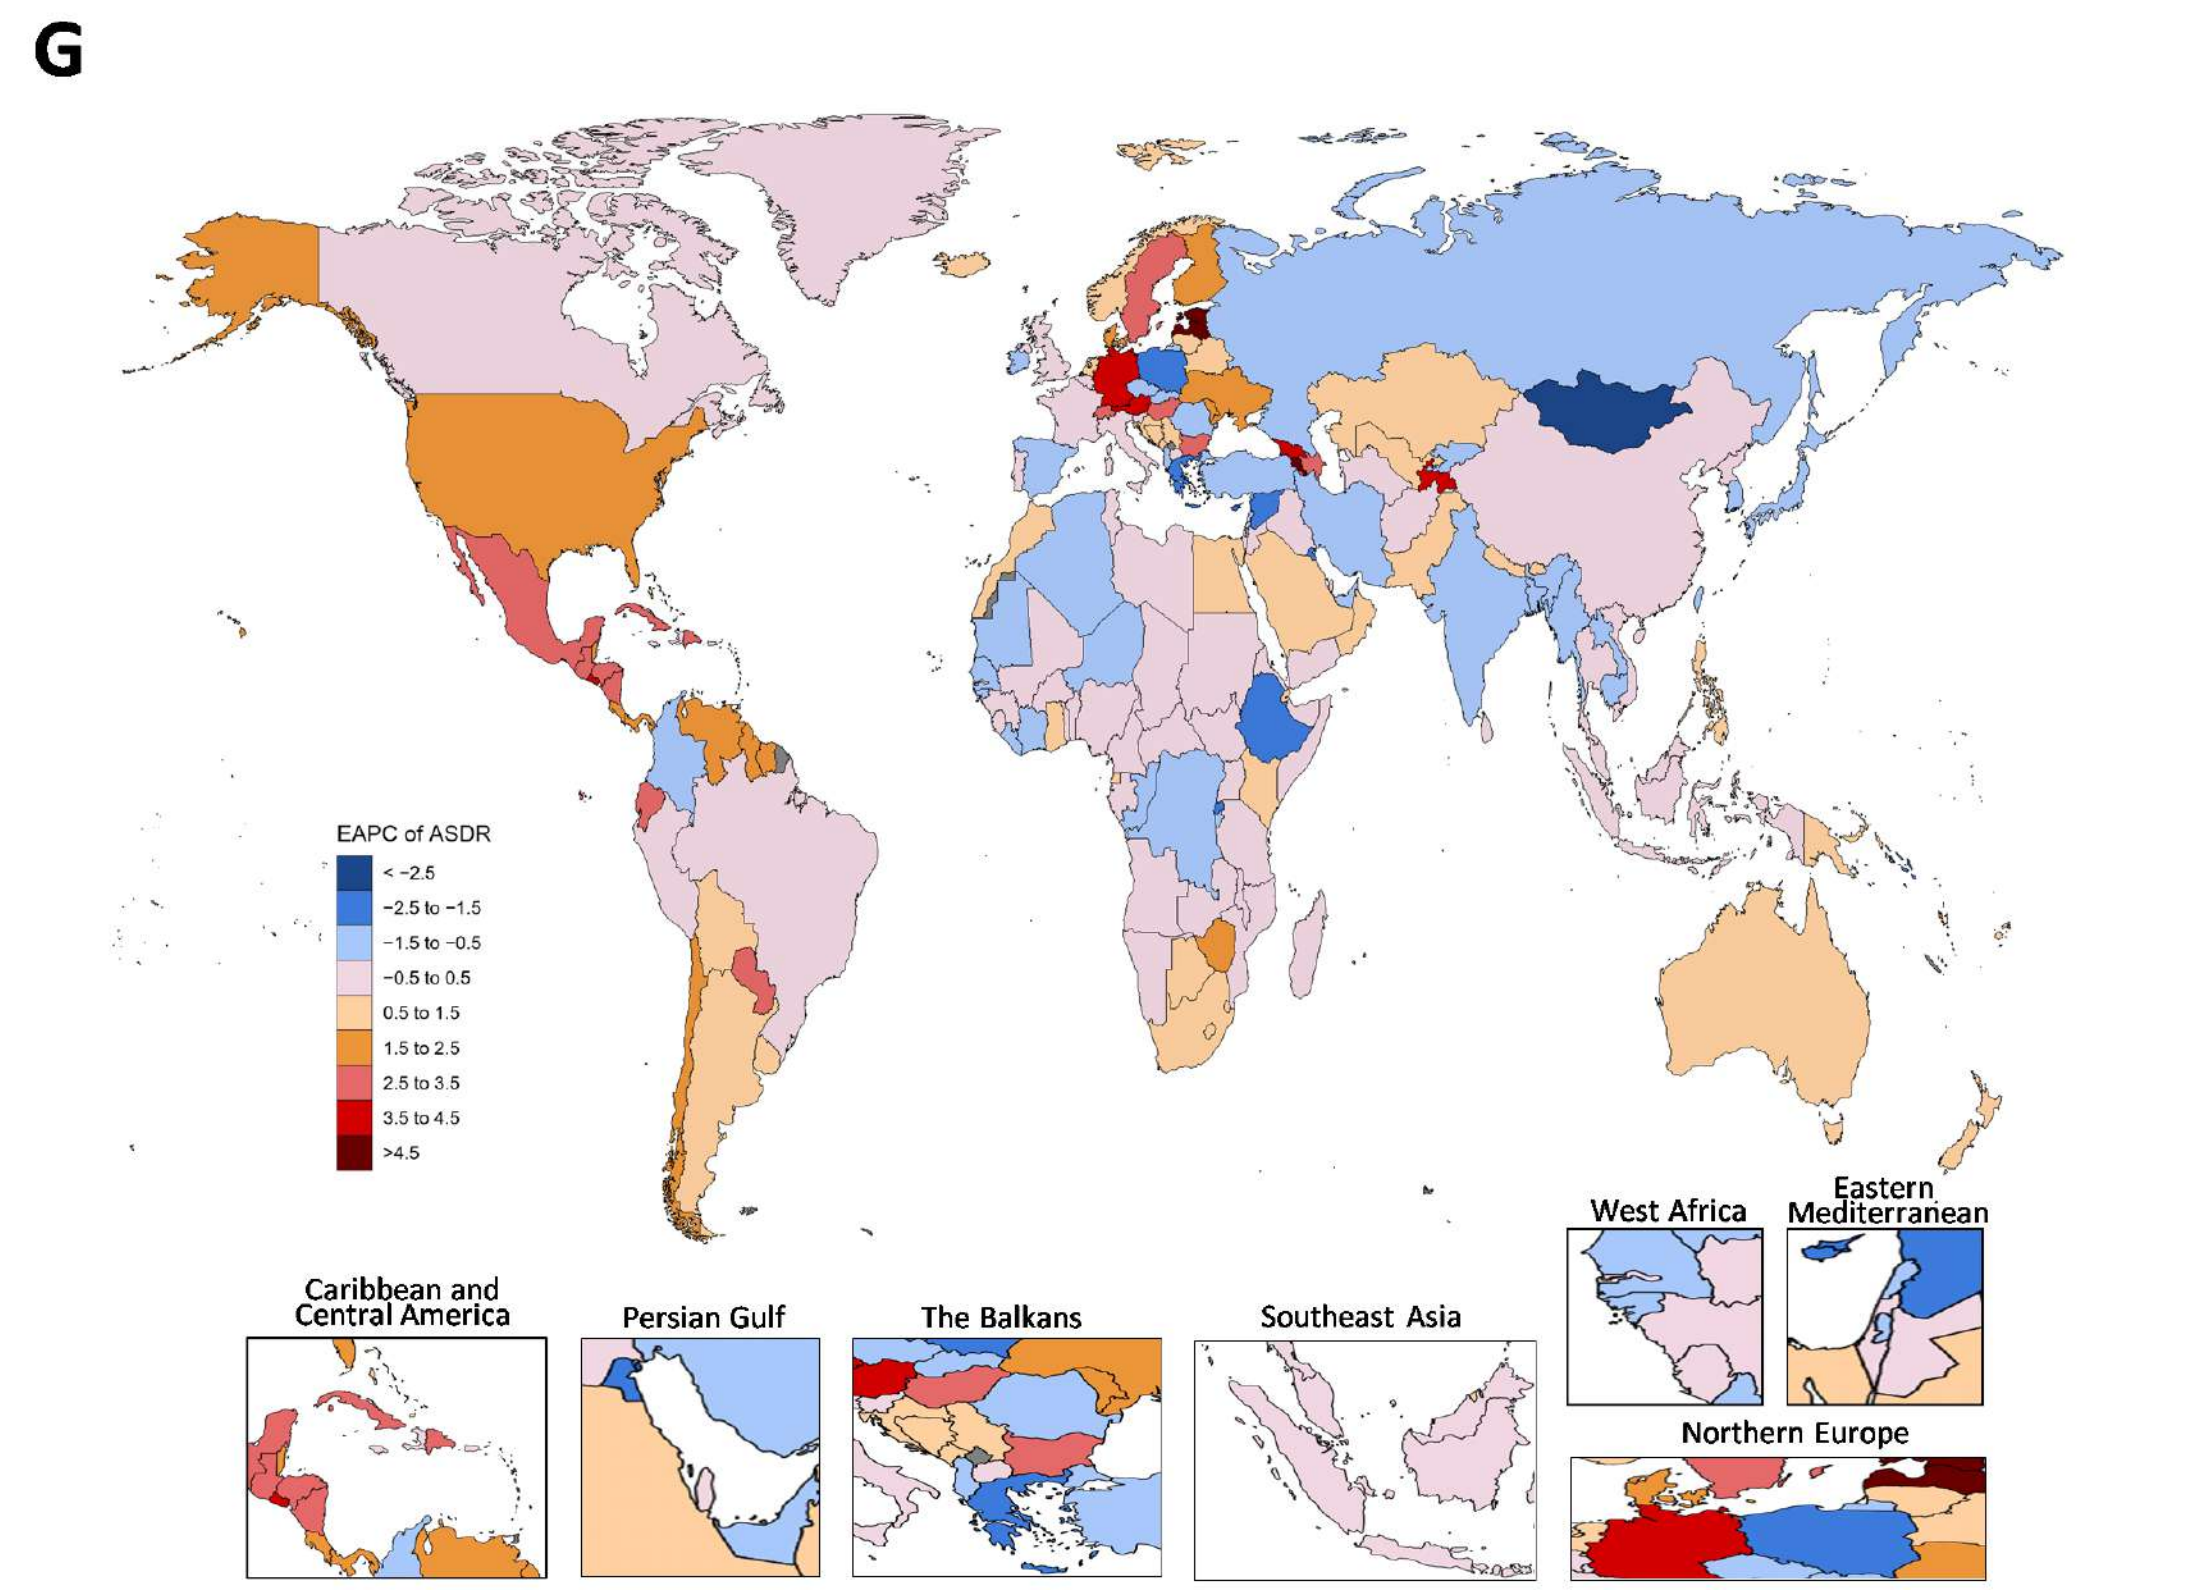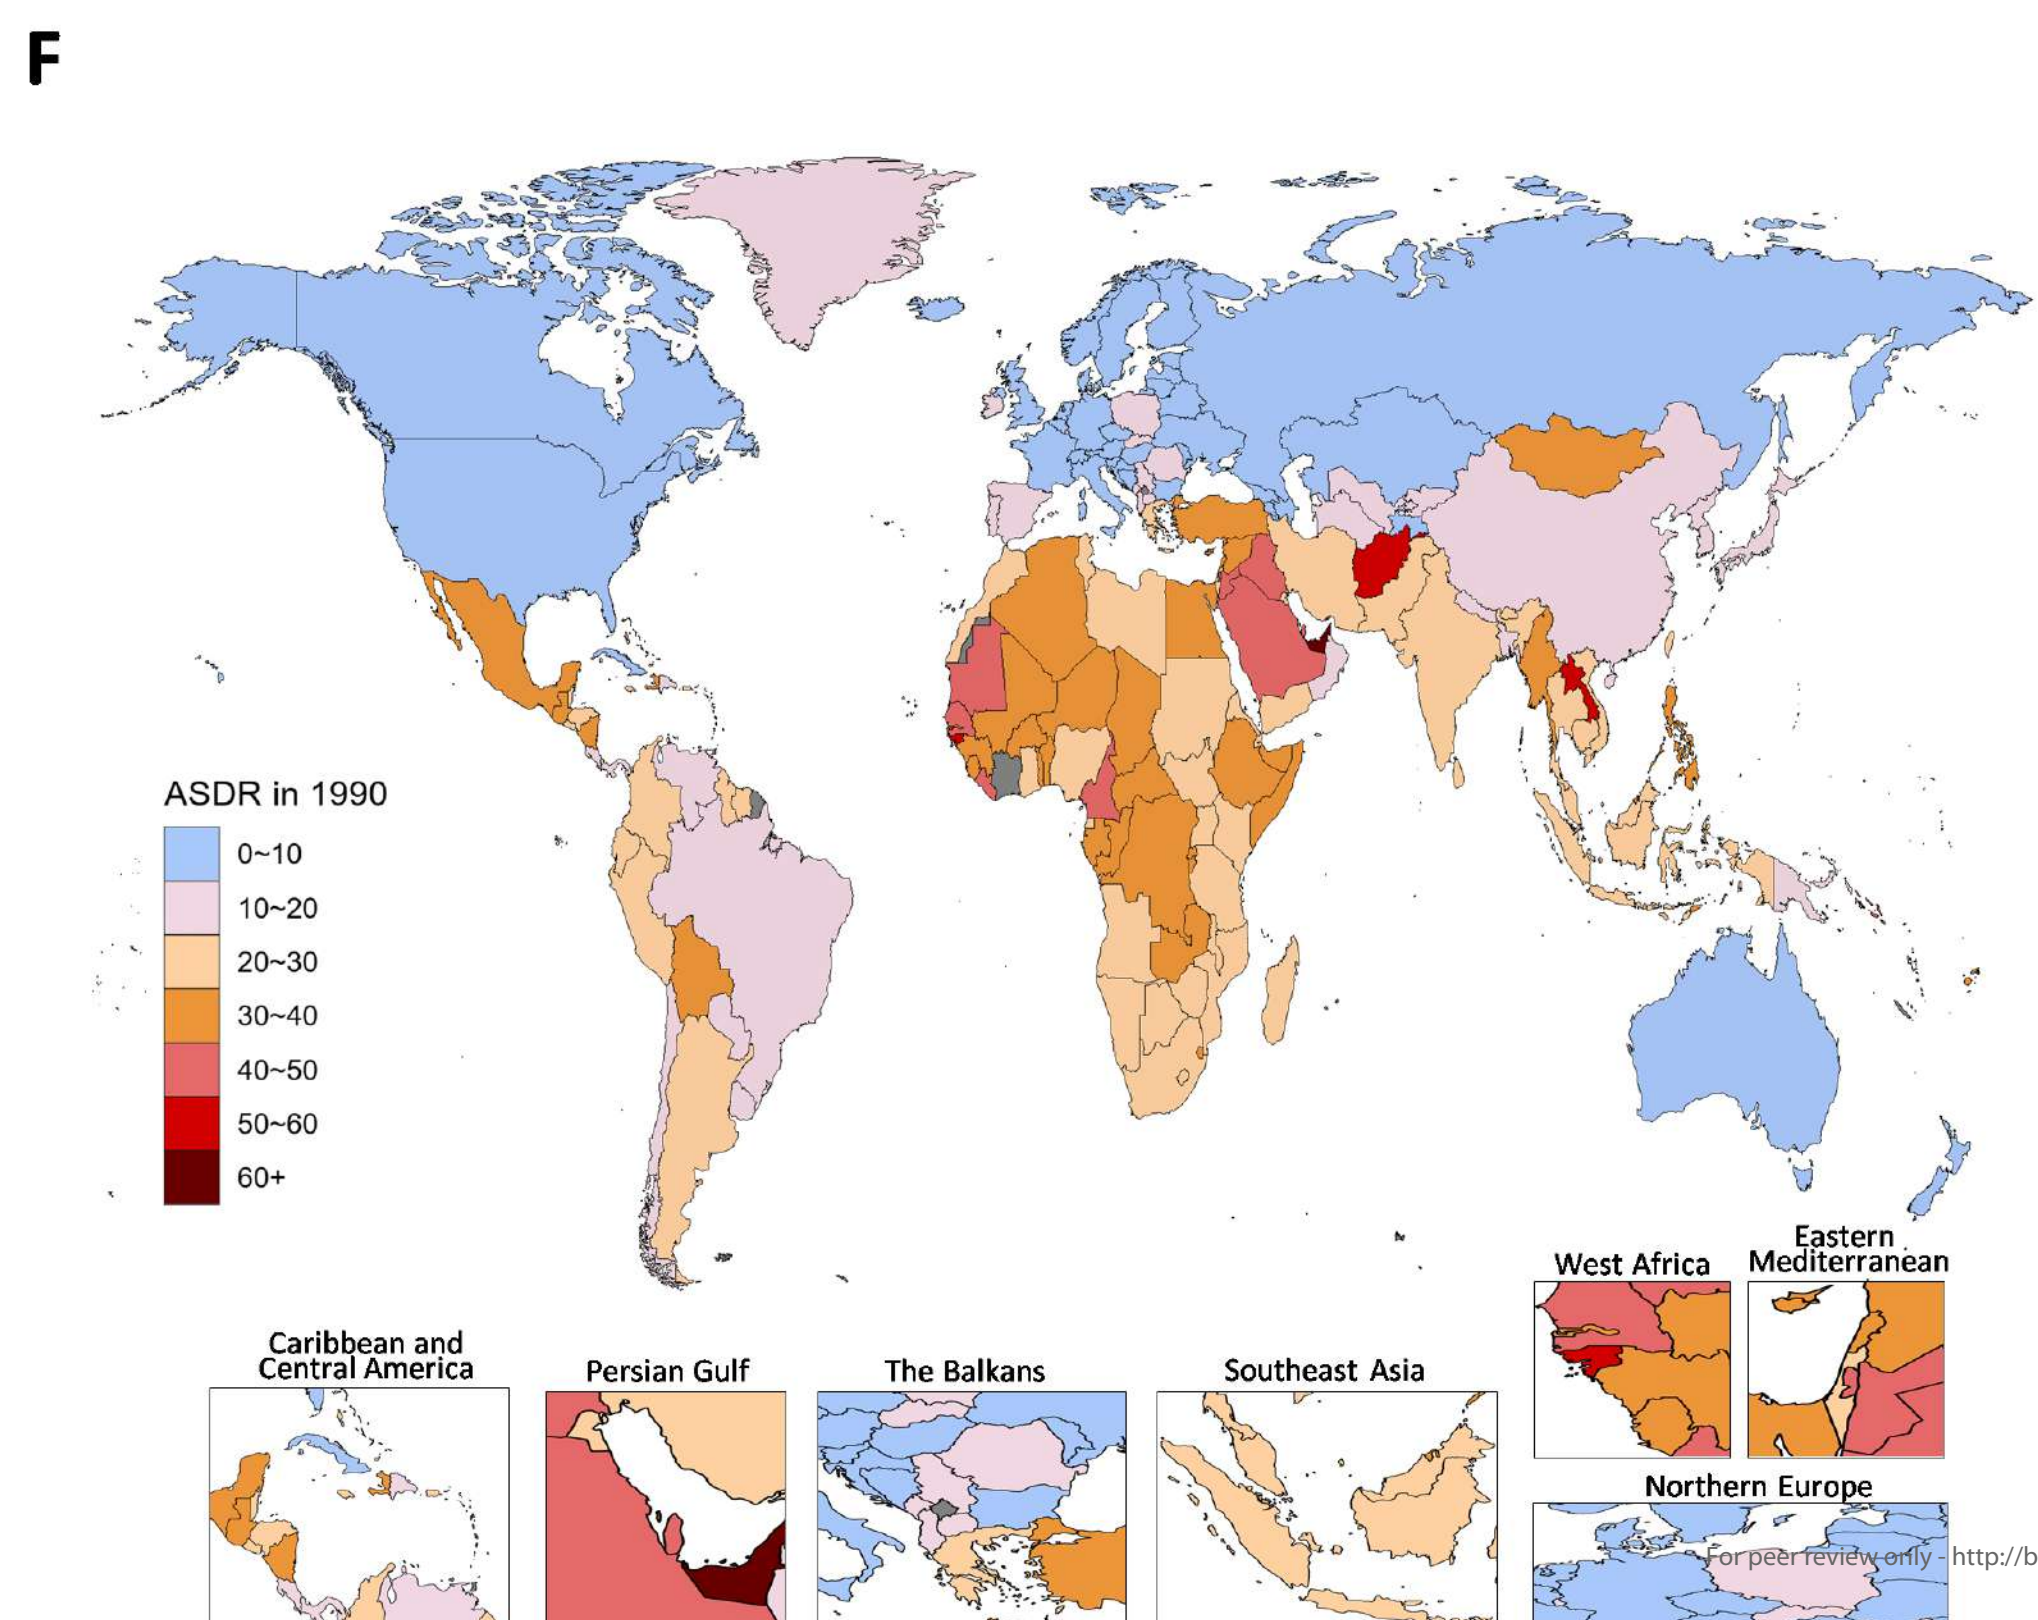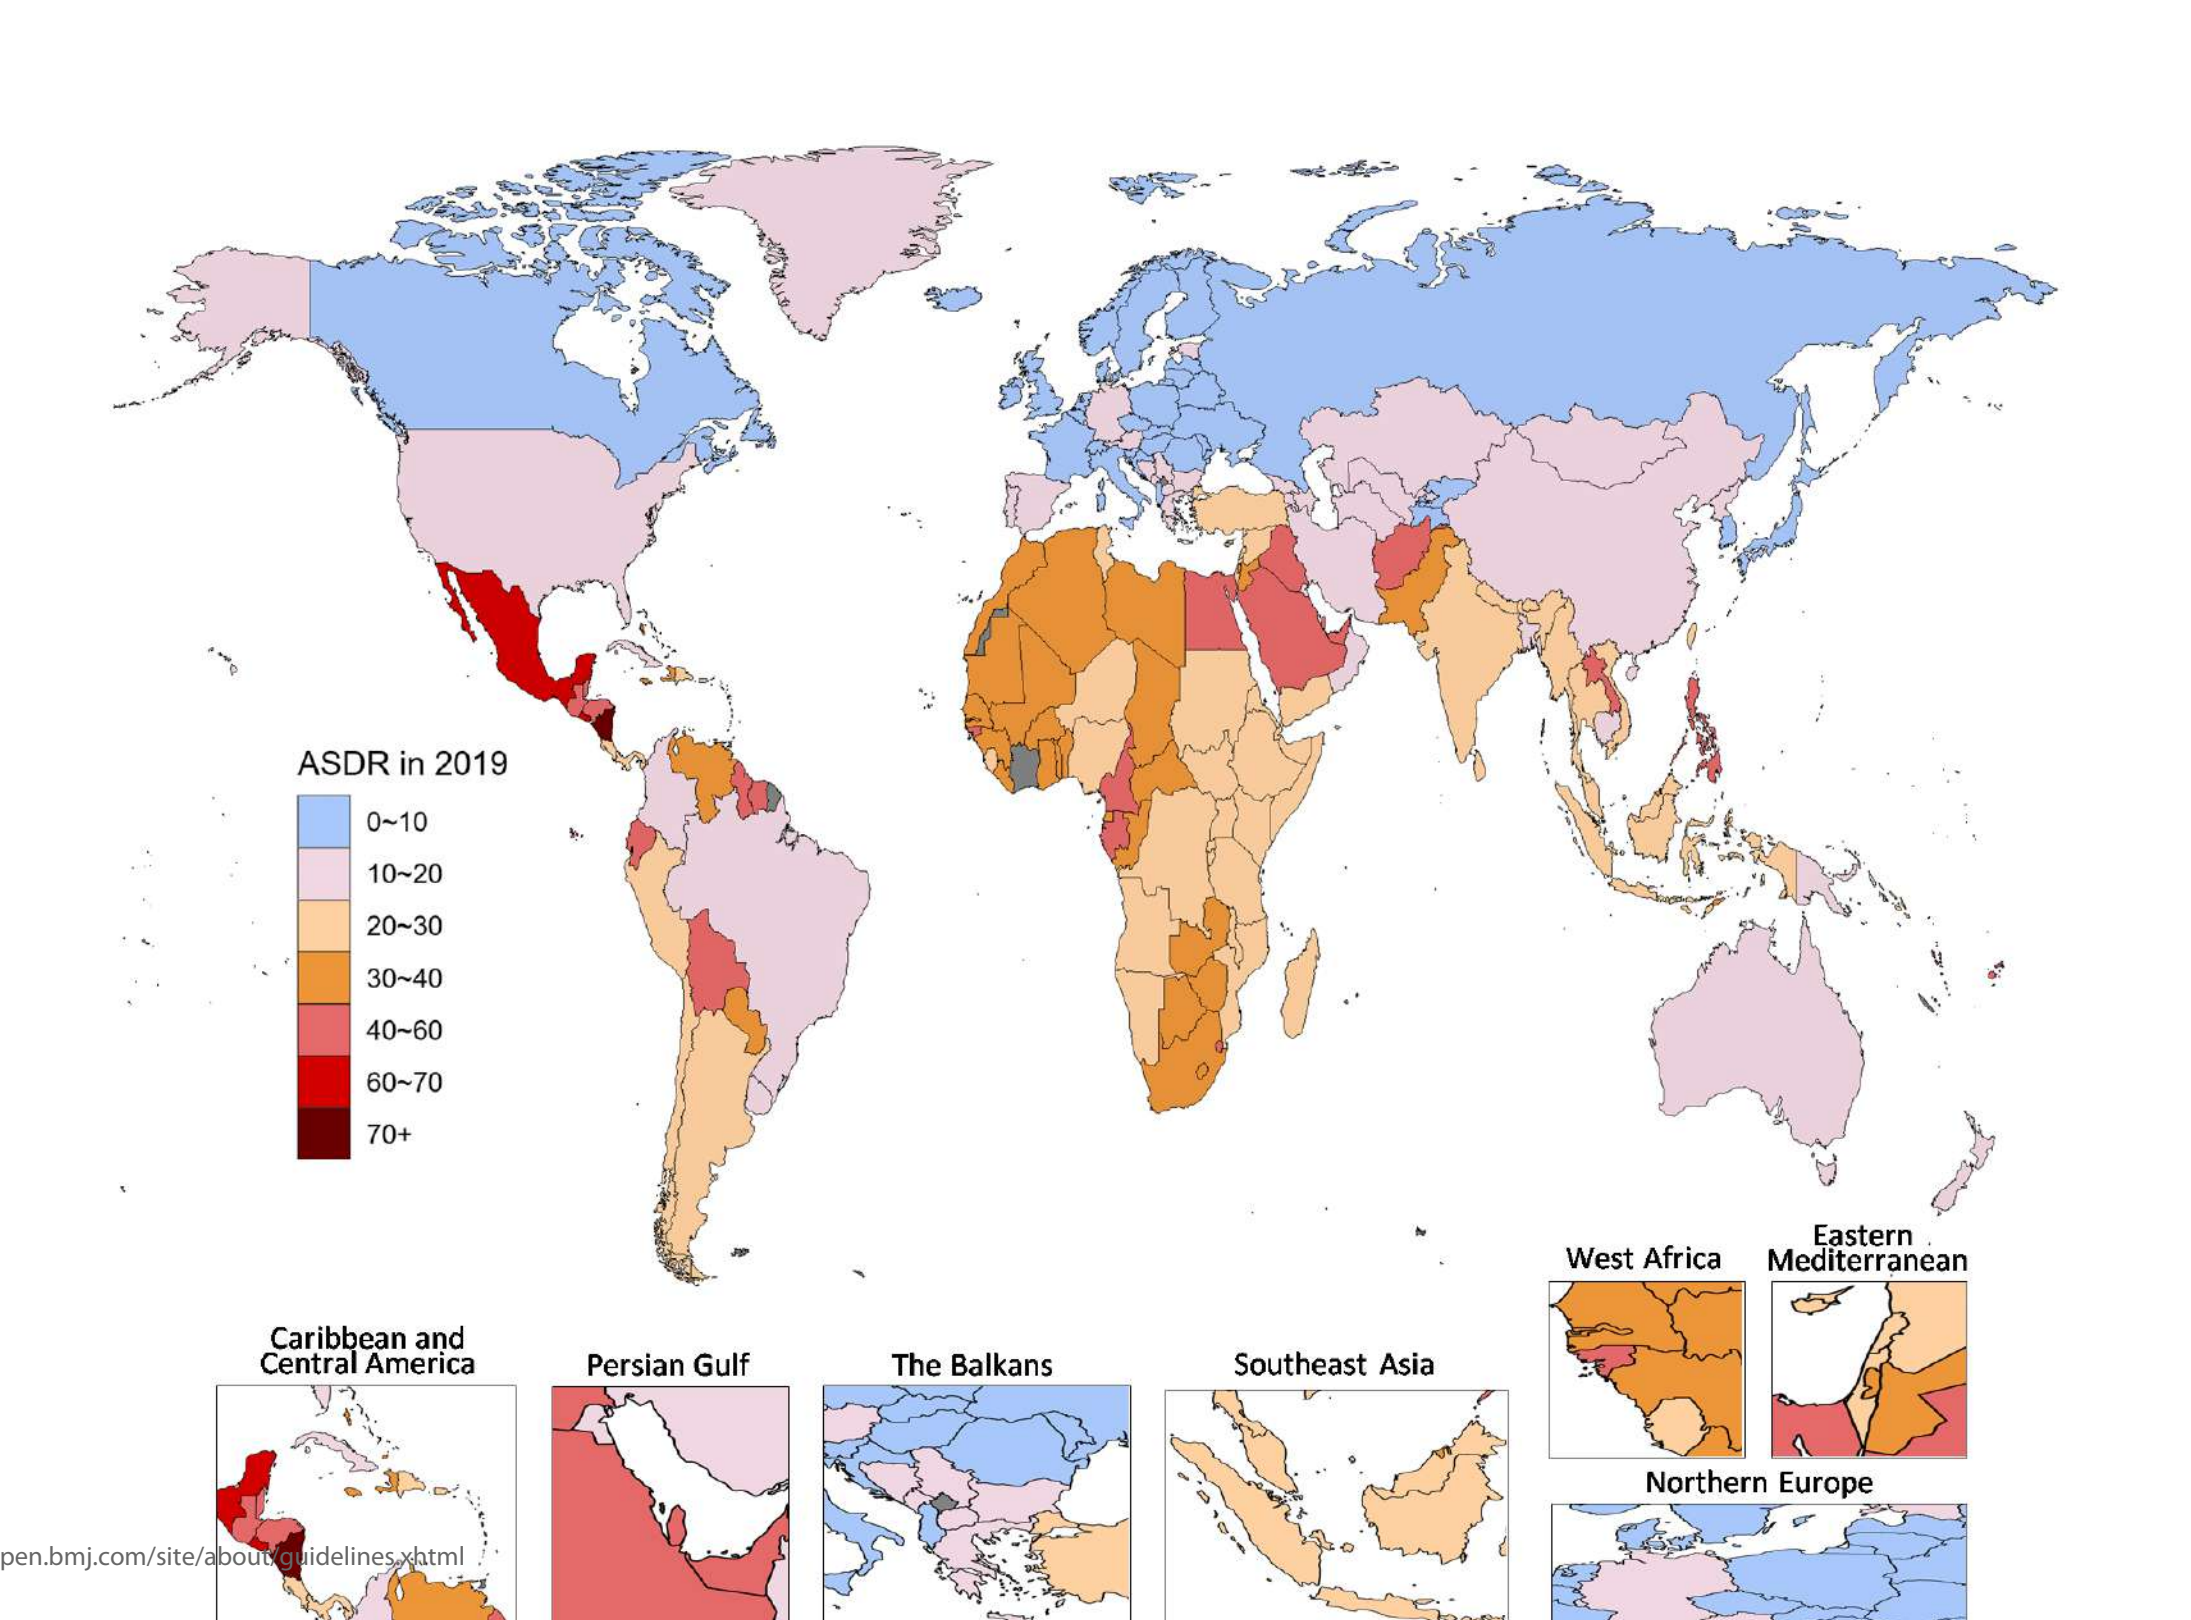







**A**

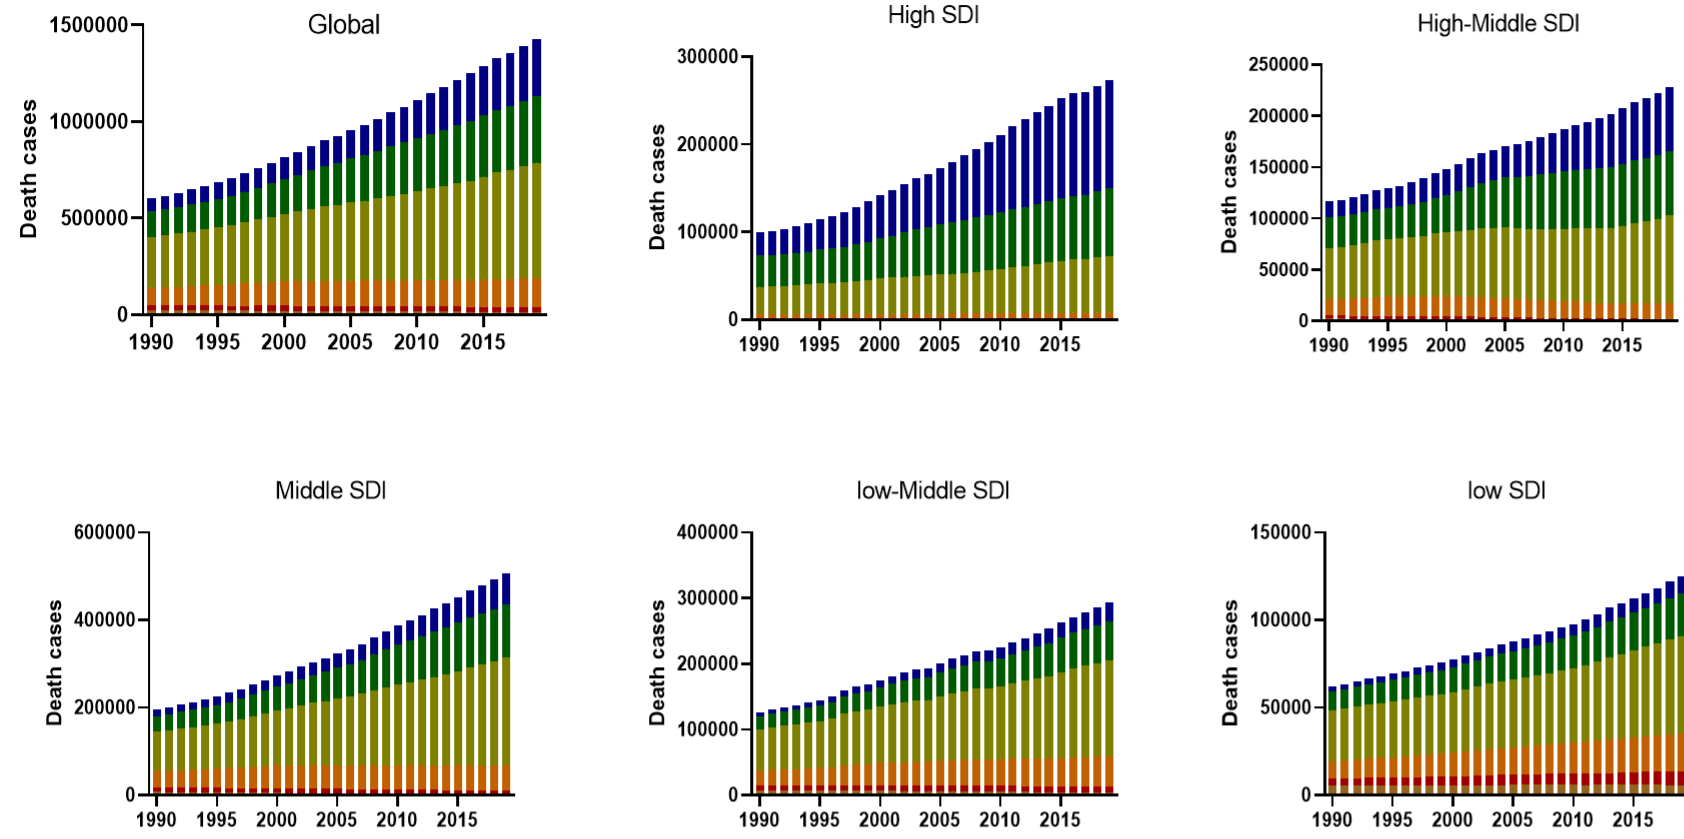

**B**

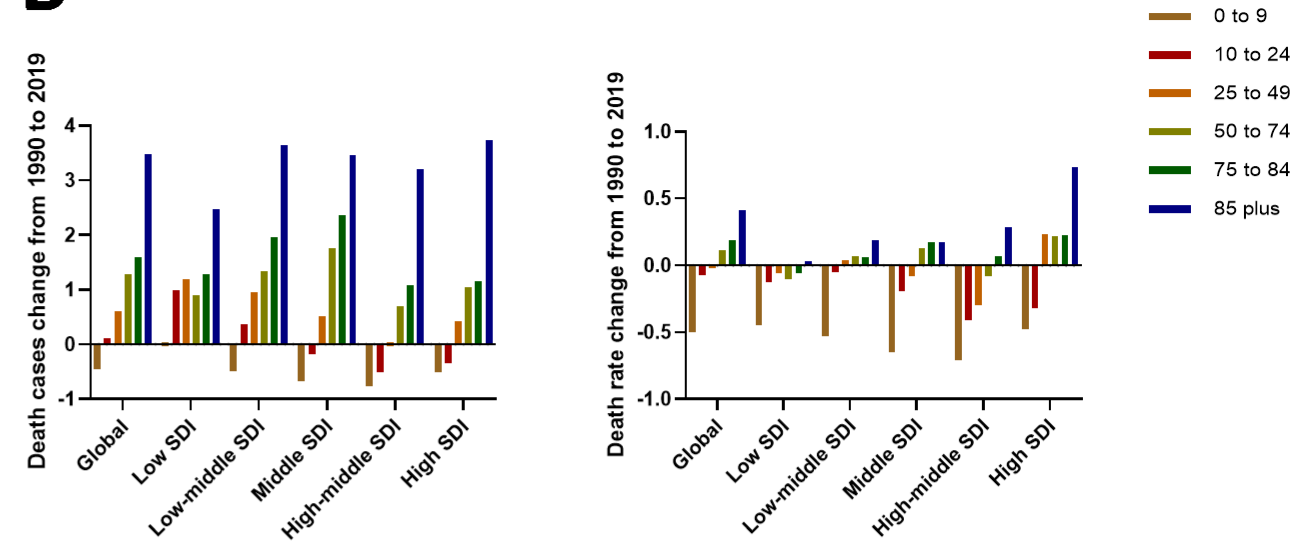

**C**

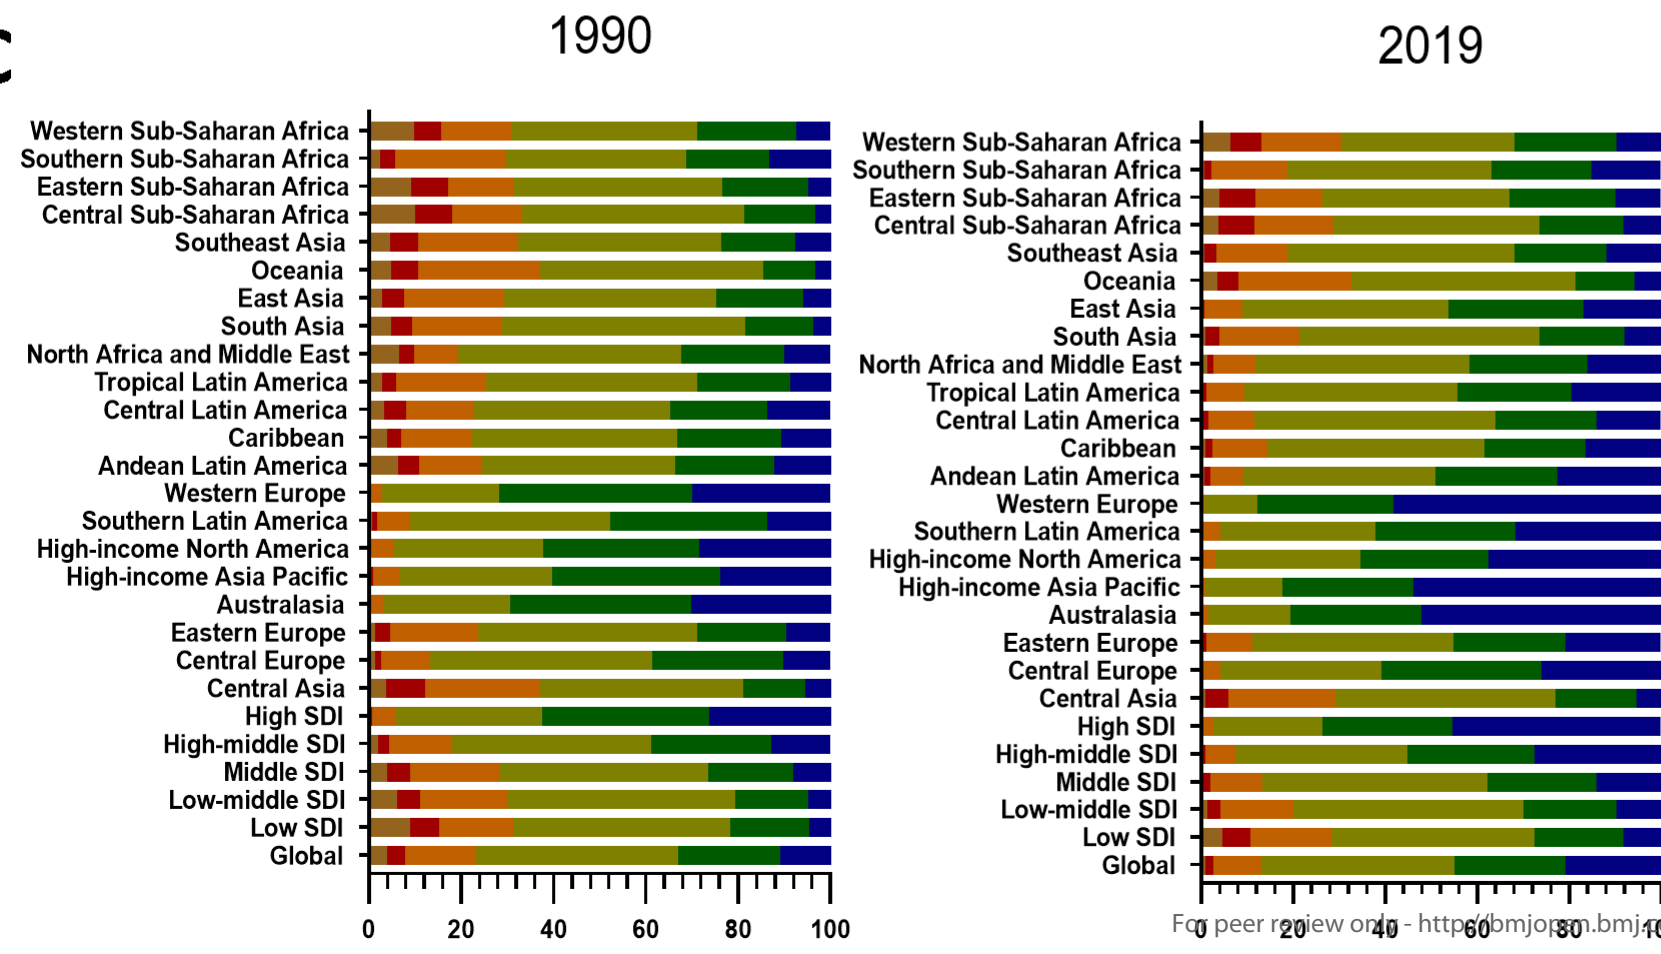

**D**

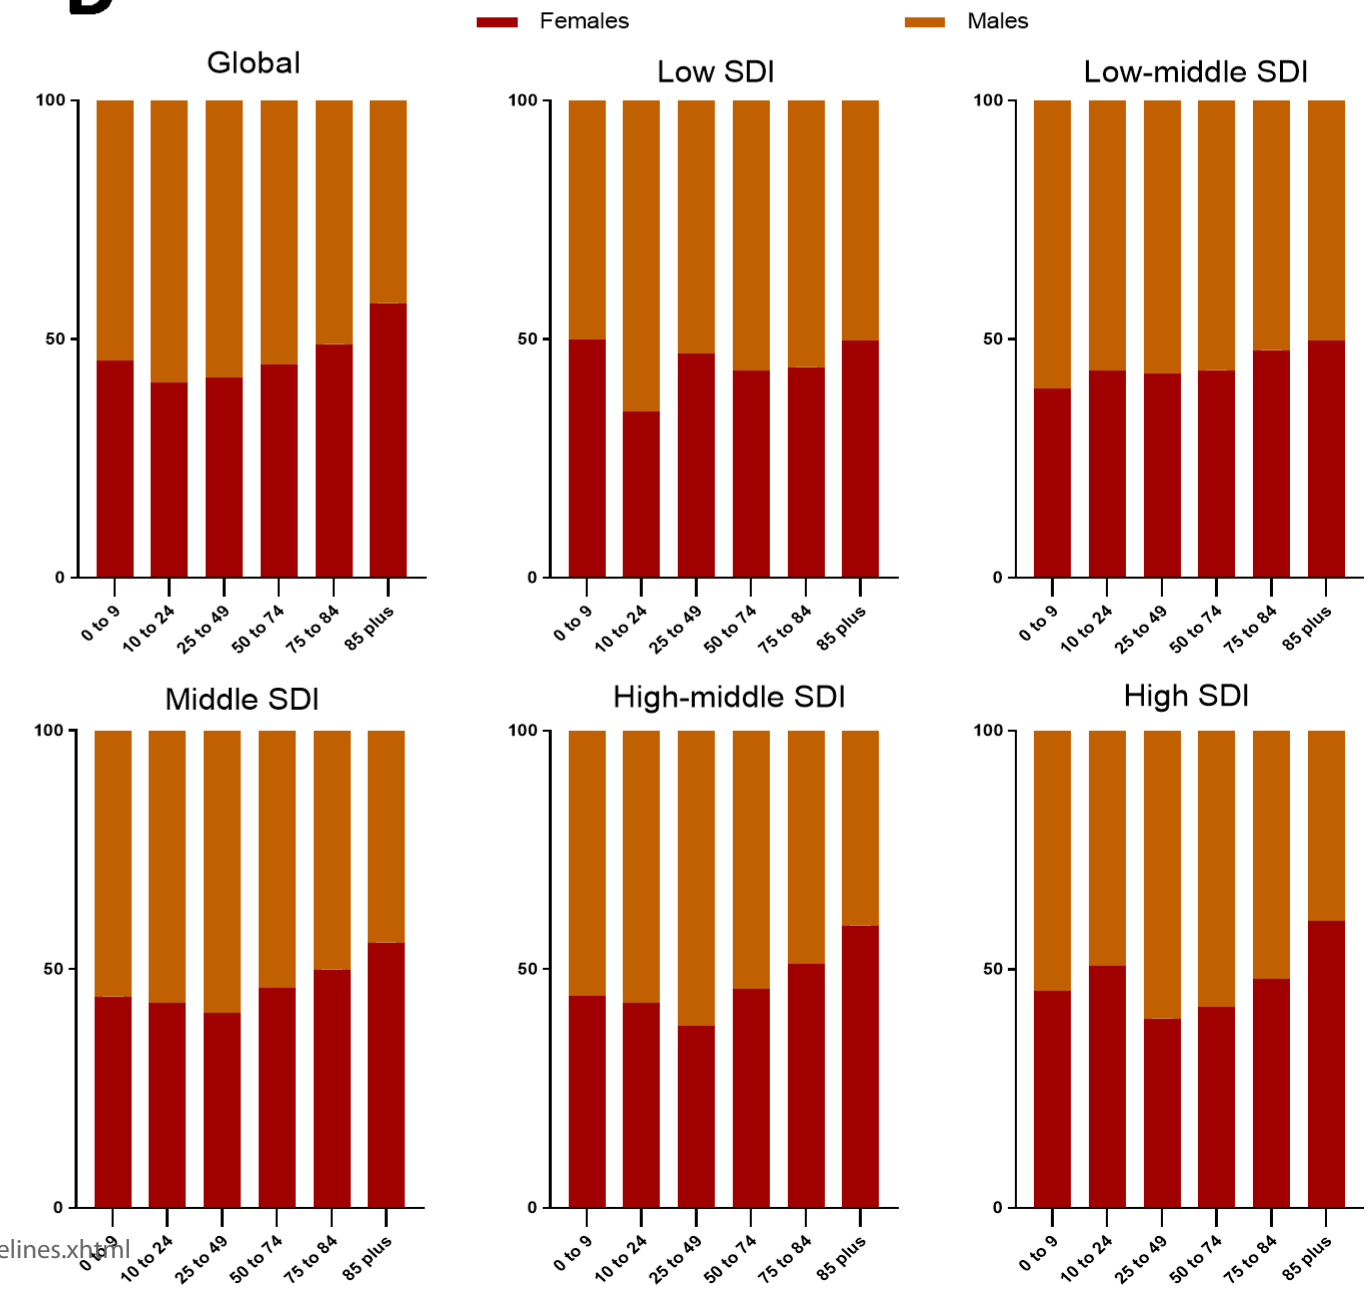



A



B



C





# Global Death Burden of Chronic Kidney Disease from 1990 to 2019

**Supplemental figure 1. Numbers of prevalence, incidence and DALYs of CKD in global and SDI areas in 1990 and 2019. DALYs, disability-adjusted life years.**

**Supplemental figure 2. The rank change of death numbers, ASDR, ASPR, ASR-DALYs, ASR-YLLs and ASR- YLDs of CKD from 1990 to 2019. DALYs, disability-adjusted life years. YLLs, years of life lost prematurely. YLDs, years lived with disability. ASDR, age-standardized death rate (per 100,000 population). ASPR, age-standardized prevalence rate (per 100,000 population). ASR-DALYs, age-standardized DALYs rate (per 100,000 population). ASR-YLLs, age-standardized YLLs rate (per 100,000 population). ASR-YLDs, age-standardized YLDs rate (per 100,000 population).**

**Supplemental figure 3. Temporal trends of ASDR, ASIR, ASPR, ASR-DALYs, ASR-YLLs and ASR- YLDs of CKD by genders from 1990 to 2019. DALYs, disability-adjusted life years. YLLs, years of life lost prematurely. YLDs, years lived with disability. ASDR, age-standardized death rate (per 100,000 population). ASPR, age-standardized prevalence rate (per 100,000 population). ASIR, age-standardized incidence rate (per 100,000 population). ASR-DALYs, age-standardized DALYs rate (per 100,000 population). ASR-YLLs, age-standardized YLLs rate (per 100,000 population). ASR-YLDs, age-standardized YLDs rate (per 100,000 population).**

**Supplemental figure 4. Relationship between ASR of prevalence, incidence and DALYs, with SDI from 1990 to 2019.**

**Supplemental figure 5. The proportions of death numbers in India, China and America in global.**

**Supplemental table 1. Prevalence cases and age-standardized prevalence rate (ASPR) of chronic kidney disease in 1990 and 2019, and the temporal trends**

1  
2  
3  
4  
5 **from 1990 to 2019 in global and regions.**  
6

7  
8 **Supplemental table 2. Incidence cases and age-standardized incidence rate (ASIR) of chronic kidney disease in 1990 and 2019, and the temporal trends from**  
9 **1990 to 2019 in global and regions.**  
10

11  
12 **Supplemental table 3. DALYs and age-standardized DALYs rate (ASR-DALYs) of chronic kidney disease in 1990 and 2019, and the temporal trends from**  
13 **1990 to 2019 in global and regions.**  
14

15  
16  
17 **Supplemental table 4. Deaths and age-standardized death rate (ASDR) of chronic kidney disease in 1990 and 2019, and the temporal trends from 1990 to 2019**  
18 **in 204 countries.**  
19

20  
21 **Supplemental table 5. Death cases ratio between females to males and age-standardized death rate (ASDR) ratio between females to males in 21 geographic**  
22 **regions from 1990 to 2019 in 21 regions.**  
23

24  
25  
26 **Supplemental table 6. Death cases ratio between females to males and age-standardized death rate (ASDR) ratio between females to males in 204 countries**  
27 **and territories from 1990 to 2019 in 204 countries.**  
28  
29  
30  
31  
32  
33  
34  
35  
36  
37  
38  
39  
40  
41  
42  
43  
44  
45  
46

1  
2  
3  
4  
5  
6  
7  
8  
9  
10  
11  
12  
13  
14  
15  
16  
17  
18  
19  
20  
21  
22  
23  
24  
25  
26  
27  
28  
29  
30  
31  
32  
33  
34  
35  
36  
37  
38  
39  
40  
41  
42  
43  
44  
45  
46



Supplemental figure 1. Numbers of prevalence, incidence and DALYs of CKD in global and SDI areas in 1990 and 2019. DALYs, disability-adjusted life years.



1  
2  
3  
4  
5  
6  
7  
8  
9  
10  
11  
12  
13  
14  
15  
16  
17  
18  
19  
20  
21  
22  
23  
24  
25  
26  
27  
28  
29  
30  
31  
32  
33  
34  
35  
36  
37  
38  
39  
40  
41  
42  
43  
44  
45  
46

**Supplemental figure 2. The rank change of death numbers, ASDR, ASPR, ASR-DALYs, ASR-YLLs and ASR- YLDs of CKD from 1990 to 2019.** DALYs, disability-adjusted life years. YLLs, years of life lost prematurely. YLDs, years lived with disability. ASDR, age-standardized death rate (per 100,000 population). ASPR, age-standardized prevalence rate (per 100,000 population). ASR-DALYs, age-standardized DALYs rate (per 100,000 population). ASR-YLLs, age-standardized YLLs rate (per 100,000 population). ASR-YLDs, age-standardized YLDs rate (per 100,000 population).

For peer review only

Both

Female

Male

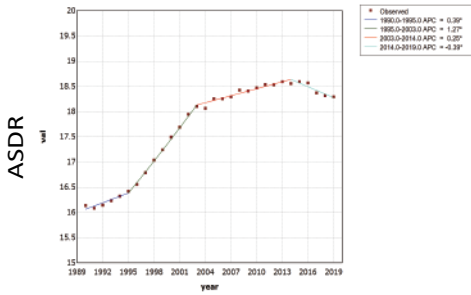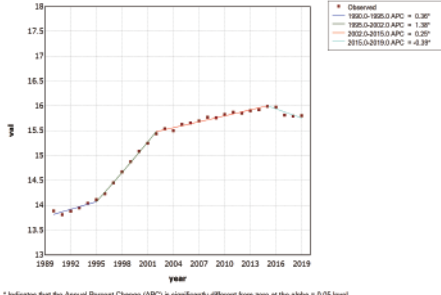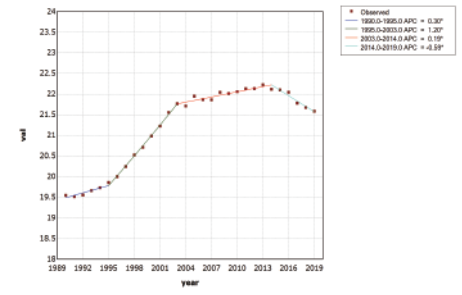

\*Indicates that the Annual Percent Change (APC) is significantly different from zero at the alpha = 0.05 level.  
Final Selected Model: 3 Joinkpoints.

\*Indicates that the Annual Percent Change (APC) is significantly different from zero at the alpha = 0.05 level.  
Final Selected Model: 3 Joinkpoints.

\*Indicates that the Annual Percent Change (APC) is significantly different from zero at the alpha = 0.05 level.  
Final Selected Model: 3 Joinkpoints.

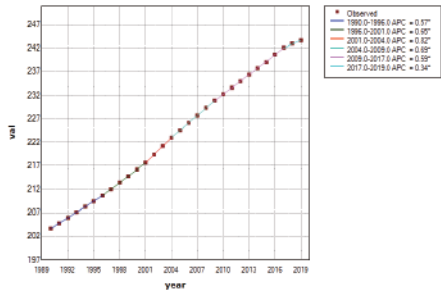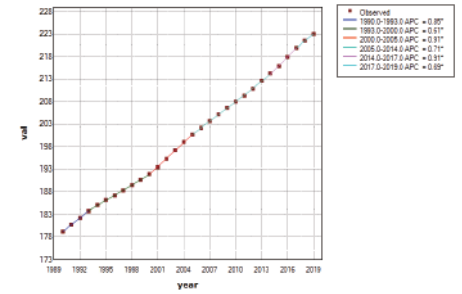

\*Indicates that the Annual Percent Change (APC) is significantly different from zero at the alpha = 0.05 level.  
Final Selected Model: 3 Joinkpoints.

\*Indicates that the Annual Percent Change (APC) is significantly different from zero at the alpha = 0.05 level.  
Final Selected Model: 3 Joinkpoints.

\*Indicates that the Annual Percent Change (APC) is significantly different from zero at the alpha = 0.05 level.  
Final Selected Model: 3 Joinkpoints.

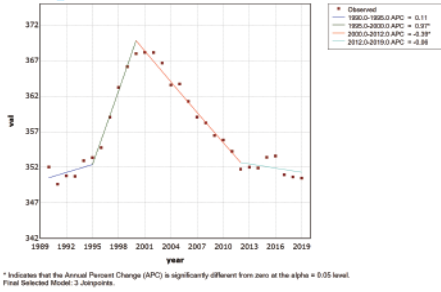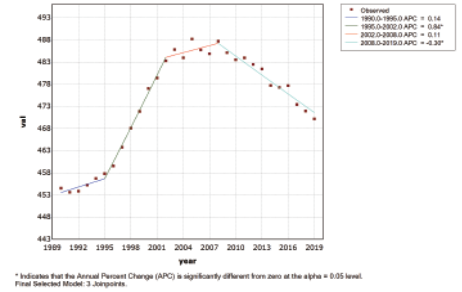

\*Indicates that the Annual Percent Change (APC) is significantly different from zero at the alpha = 0.05 level.  
Final Selected Model: 3 Joinkpoints.

\*Indicates that the Annual Percent Change (APC) is significantly different from zero at the alpha = 0.05 level.  
Final Selected Model: 3 Joinkpoints.

\*Indicates that the Annual Percent Change (APC) is significantly different from zero at the alpha = 0.05 level.  
Final Selected Model: 3 Joinkpoints.

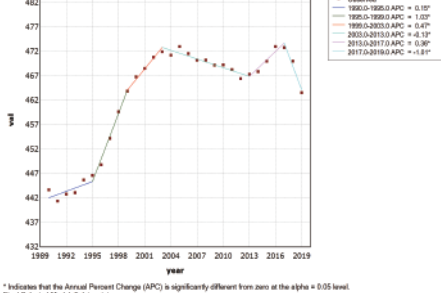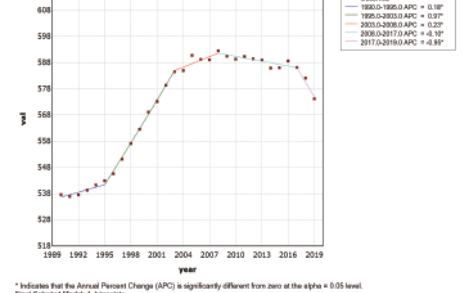

\*Indicates that the Annual Percent Change (APC) is significantly different from zero at the alpha = 0.05 level.  
Final Selected Model: 3 Joinkpoints.

\*Indicates that the Annual Percent Change (APC) is significantly different from zero at the alpha = 0.05 level.  
Final Selected Model: 3 Joinkpoints.

\*Indicates that the Annual Percent Change (APC) is significantly different from zero at the alpha = 0.05 level.  
Final Selected Model: 3 Joinkpoints.

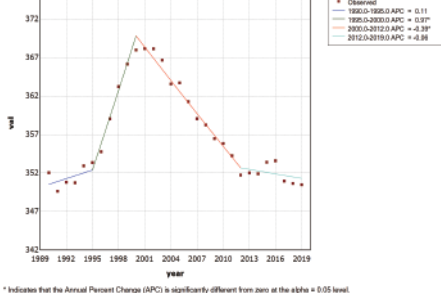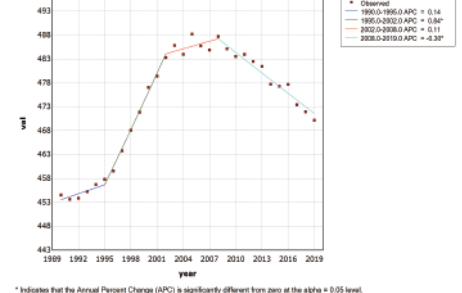

\*Indicates that the Annual Percent Change (APC) is significantly different from zero at the alpha = 0.05 level.  
Final Selected Model: 3 Joinkpoints.

\*Indicates that the Annual Percent Change (APC) is significantly different from zero at the alpha = 0.05 level.  
Final Selected Model: 3 Joinkpoints.

\*Indicates that the Annual Percent Change (APC) is significantly different from zero at the alpha = 0.05 level.  
Final Selected Model: 3 Joinkpoints.

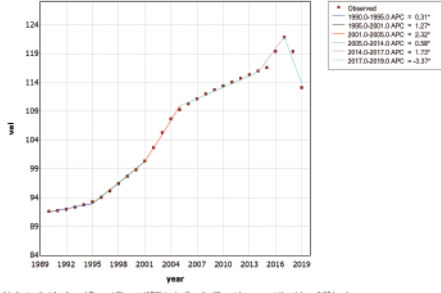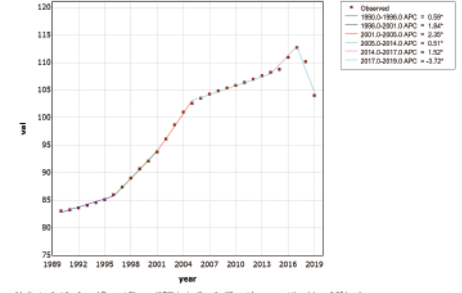

\*Indicates that the Annual Percent Change (APC) is significantly different from zero at the alpha = 0.05 level.  
Final Selected Model: 3 Joinkpoints.

\*Indicates that the Annual Percent Change (APC) is significantly different from zero at the alpha = 0.05 level.  
Final Selected Model: 3 Joinkpoints.

\*Indicates that the Annual Percent Change (APC) is significantly different from zero at the alpha = 0.05 level.  
Final Selected Model: 3 Joinkpoints.

1  
2  
3  
4  
5 **Supplemental figure 3. Temporal trends of ASDR, ASIR, ASPR, ASR-DALYs, ASR-YLLs and ASR- YLDs of CKD by genders from 1990 to 2019.** DALYs,  
6 disability-adjusted life years. YLLs, years of life lost prematurely. YLDs, years lived with disability. ASDR, age-standardized death rate (per 100,000 population).  
7 ASPR, age-standardized prevalence rate (per 100,000 population). ASIR, age-standardized incidence rate (per 100,000 population). ASR-DALYs, age-standardized  
8 DALYs rate (per 100,000 population). ASR-YLLs, age-standardized YLLs rate (per 100,000 population). ASR-YLDs, age-standardized YLDs rate (per 100,000  
9 population).  
10  
11  
12  
13  
14  
15  
16  
17  
18  
19  
20  
21  
22  
23  
24  
25  
26  
27  
28  
29  
30  
31  
32  
33  
34  
35  
36  
37  
38  
39  
40  
41  
42  
43  
44  
45  
46

For peer review only



Supplemental figure 4. Relationship between ASR of prevalence, incidence and DALYs, with SDI from 1990 to 2019.



1  
2  
3  
4  
5  
6  
7  
8  
9  
10  
11  
12  
13  
14  
15  
16  
17  
18  
19  
20  
21  
22  
23  
24  
25  
26  
27  
28  
29  
30  
31  
32  
33  
34  
35  
36  
37  
38  
39  
40  
41  
42  
43  
44  
45  
46  
47  
48  
49  
50  
51  
52  
53  
54  
55  
56  
57  
58  
59  
60



Supplemental figure 5. The proportions of death numbers in India, China and America in global.

1  
2  
3  
4  
5 **Supplemental table 1. Prevalence cases and age-standardized prevalence rate (ASPR) of chronic kidney disease in 1990 and 2019, and the temporal trends**  
6 **from 1990 to 2019 in global and regions.**  
7  
8  
9  
10  
11  
12  
13  
14  
15  
16  
17  
18  
19  
20  
21  
22  
23  
24  
25  
26  
27  
28  
29  
30  
31  
32  
33  
34  
35  
36  
37  
38  
39  
40  
41  
42  
43  
44  
45  
46

For peer review only

| Characteristics               | 1990                                 |                           | 2019                                 |                            | 1990-2019             |
|-------------------------------|--------------------------------------|---------------------------|--------------------------------------|----------------------------|-----------------------|
|                               | Prevalence cases (*10 <sup>6</sup> ) | ASPR per 100,000          | Prevalence cases (*10 <sup>6</sup> ) | ASPR per 100,000           | EAPC of ASPR (95% CI) |
|                               | (95% UI)                             | population (95% UI)       | (95% UI)                             | population (95% UI)        |                       |
| Global                        | 341.67 (316.59-366.107.7)            | 7855.83 (7300.33-8372.66) | 697.29 (650.05-741080.75)            | 8596.21 (8015.74-9125.28)  | 0.32 (0.32 to 0.33)   |
| <b>Gender</b>                 |                                      |                           |                                      |                            |                       |
| Males                         | 153.14 (141.72-164.63)               | 7349.01 (6823.3-7842.18)  | 314.32 (292.96-334.84)               | 8109.77 (7572.96-8608.03)  | 0.69 (0.68 to 0.7)    |
| Females                       | 188.52 (174.87-201.34)               | 8305.89 (7710.48-8854.59) | 382.98 (356.75-406.65)               | 9049.82 (8425.02-9616.13)  | 0.69 (0.68 to 0.7)    |
| <b>Sociodemographic index</b> |                                      |                           |                                      |                            |                       |
| Low                           | 19.74 (18.26-21321.4)                | 6338.15 (5882.6-6789.29)  | 48.7 (45.05-52510.46)                | 7057.41 (6568.24-7529.2)   | 0.34 (0.32 to 0.36)   |
| Low-middle                    | 58.61 (54.03-63338.25)               | 7766.83 (7198.66-8314.67) | 130.15 (120.81-139501.25)            | 8579.86 (7996.24-9142.82)  | 0.25 (0.21 to 0.29)   |
| Middle                        | 107.24 (98.79-115911.52)             | 8440.84 (7808.66-9019.18) | 239.88 (222.64-256277.84)            | 9491.19 (8838.42-10086.19) | 0.48 (0.45 to 0.5)    |
| High-middle                   | 86.19 (79.75-92396.6)                | 7781.68 (7221.18-8317.69) | 156.23 (145.42-166645.78)            | 8350.95 (7763.91-8901.8)   | 0.32 (0.29 to 0.34)   |
| High                          | 69.73 (64.86-74222.57)               | 7026.65 (6533.72-7475.58) | 121.95 (114.53-129214.01)            | 7364.77 (6889.24-7796.06)  | 0.12 (0.09 to 0.14)   |
| <b>21 GBD regions</b>         |                                      |                           |                                      |                            |                       |
| Central Asia                  | 4.45 (4.11-4803.7)                   | 8137.03 (7524.1-8741.66)  | 8.15 (7.51-8784.58)                  | 9524.26 (8802.23-10175.81) | 0.59 (0.53 to 0.65)   |

|    |                              |                        |                            |                           |                              |                       |
|----|------------------------------|------------------------|----------------------------|---------------------------|------------------------------|-----------------------|
| 1  |                              |                        |                            |                           |                              |                       |
| 2  |                              |                        |                            |                           |                              |                       |
| 3  |                              |                        |                            |                           |                              |                       |
| 4  |                              |                        |                            |                           |                              |                       |
| 5  |                              |                        |                            |                           |                              |                       |
| 6  | Central Europe               | 9.15 (8.44-9807.35)    | 6605.48 (6109.43-7070.96)  | 13.57 (12.65-14461.73)    | 7564.59 (7024.38-8040.5)     | 0.42 (0.4 to 0.44)    |
| 7  |                              |                        |                            |                           |                              |                       |
| 8  | Eastern Europe               | 24.38 (22.55-26323.67) | 9409.89 (8700.06-10160.11) | 30.13 (27.96-32292.36)    | 10377.83 (9616.95-11142.47)  | 0.39 (0.34 to 0.44)   |
| 9  |                              |                        |                            |                           |                              |                       |
| 10 | Australasia                  | 1.41 (1.33-1487.37)    | 6177.9 (5831.64-6510.55)   | 2.95 (2.77-3128.02)       | 6532.01 (6133.49-6925.11)    | 0.22 (0.2 to 0.23)    |
| 11 |                              |                        |                            |                           |                              |                       |
| 12 | High-income Asia Pacific     | 16.55 (15.42-17679.41) | 8433.41 (7860.45-8971.08)  | 31 (29.12-32934.31)       | 8231.15 (7714.65-8729.32)    | -0.1 (-0.12 to -0.08) |
| 13 |                              |                        |                            |                           |                              |                       |
| 14 | High-income North America    | 26.23 (24.33-28067.57) | 7750.33 (7175.26-8252.76)  | 43.98 (41.11-46803.08)    | 7982.58 (7433.75-8484.6)     | 0.03 (-0.02 to 0.08)  |
| 15 |                              |                        |                            |                           |                              |                       |
| 16 | Southern Latin America       | 2.85 (2.66-3038.14)    | 6199.61 (5786.14-6591)     | 5.72 (5.38-6077.58)       | 7174.32 (6750.95-7629.01)    | 0.54 (0.49 to 0.59)   |
| 17 |                              |                        |                            |                           |                              |                       |
| 18 | Western Europe               | 29.05 (27.04-30993.2)  | 5488.94 (5116.7-5832.82)   | 45.44 (42.65-48233.7)     | 5690.53 (5326.14-6020.93)    | 0.08 (0.06 to 0.1)    |
| 19 |                              |                        |                            |                           |                              |                       |
| 20 | Andean Latin America         | 1.76 (1.52-2061.21)    | 7004.76 (6076.38-8070.59)  | 5.32 (4.71-6069.48)       | 9101.2 (8067.32-10290.91)    | 0.93 (0.91 to 0.94)   |
| 21 |                              |                        |                            |                           |                              |                       |
| 22 | Caribbean                    | 1.97 (1.84-2108.93)    | 6840.61 (6371.07-7299.12)  | 4.29 (4.03-4568.68)       | 8457.06 (7927.23-8994.33)    | 0.74 (0.7 to 0.78)    |
| 23 |                              |                        |                            |                           |                              |                       |
| 24 | Central Latin America        | 10.31 (9.55-11027.08)  | 9865 (9168.77-10521.68)    | 29.53 (27.68-31265.59)    | 12139.27 (11377.05-12843.88) | 0.68 (0.64 to 0.71)   |
| 25 |                              |                        |                            |                           |                              |                       |
| 26 | Tropical Latin America       | 7.08 (6.58-7550.26)    | 6482.97 (6054.23-6886)     | 17.9 (16.76-18992.36)     | 7399.15 (6923.65-7835.63)    | 0.42 (0.39 to 0.45)   |
| 27 |                              |                        |                            |                           |                              |                       |
| 28 | North Africa and Middle East | 15.77 (14.73-16764.82) | 7697.07 (7182.72-8168.78)  | 49.8 (46.52-52818.54)     | 10589.67 (9930.4-11229.54)   | 1.17 (1.13 to 1.22)   |
| 29 |                              |                        |                            |                           |                              |                       |
| 30 | South Asia                   | 60.22 (55.46-65289.02) | 8186.89 (7582.95-8782.32)  | 139.51 (128.99-150327.5)  | 8847.66 (8206.45-9453.58)    | 0.11 (0.03 to 0.18)   |
| 31 |                              |                        |                            |                           |                              |                       |
| 32 | East Asia                    | 82.94 (76.25-90185.75) | 7989.69 (7377.2-8599.68)   | 156.84 (144.51-169062.38) | 8180.65 (7568.21-8798.3)     | 0.29 (0.2 to 0.37)    |
| 33 |                              |                        |                            |                           |                              |                       |
| 34 | Oceania                      | 0.36 (0.33-391.33)     | 8440.17 (7784.51-9111.81)  | 0.9 (0.82-974.96)         | 9296.4 (8596.13-9971.06)     | 0.3 (0.29 to 0.31)    |
| 35 |                              |                        |                            |                           |                              |                       |
| 36 |                              |                        |                            |                           |                              |                       |
| 37 |                              |                        |                            |                           |                              |                       |
| 38 |                              |                        |                            |                           |                              |                       |
| 39 |                              |                        |                            |                           |                              |                       |
| 40 |                              |                        |                            |                           |                              |                       |
| 41 |                              |                        |                            |                           |                              |                       |
| 42 |                              |                        |                            |                           |                              |                       |
| 43 |                              |                        |                            |                           |                              |                       |
| 44 |                              |                        |                            |                           |                              |                       |
| 45 |                              |                        |                            |                           |                              |                       |
| 46 |                              |                        |                            |                           |                              |                       |

1  
2  
3  
4  
5  
6  
7  
8  
9  
10  
11  
12  
13  
14  
15  
16  
17  
18  
19  
20  
21  
22  
23  
24  
25  
26  
27  
28  
29  
30  
31  
32  
33  
34  
35  
36  
37  
38  
39  
40  
41  
42  
43  
44  
45  
46

|                             |                        |                            |                        |                             |                     |
|-----------------------------|------------------------|----------------------------|------------------------|-----------------------------|---------------------|
| Southeast Asia              | 31.01 (28.51-33656.96) | 9351.48 (8661.82-10057.66) | 71.14 (65.94-76348.22) | 10803.4 (10057.32-11534.34) | 0.5 (0.49 to 0.52)  |
| Central Sub-Saharan Africa  | 1.69 (1.55-1841.1)     | 5306.9 (4899.19-5732.96)   | 4.52 (4.16-4907.57)    | 5867.73 (5434.29-6284.81)   | 0.36 (0.32 to 0.39) |
| Eastern Sub-Saharan Africa  | 5.54 (5.12-5997.22)    | 5254.32 (4862.09-5638.51)  | 13.92 (12.84-15065.98) | 5800.09 (5395.2-6210.24)    | 0.36 (0.33 to 0.38) |
| Southern Sub-Saharan Africa | 2.3 (2.13-2464.83)     | 6633.49 (6172.65-7075.02)  | 5.02 (4.66-5366.22)    | 7769.91 (7260.61-8261.86)   | 0.53 (0.45 to 0.61) |
| Western Sub-Saharan Africa  | 6.64 (6.16-7139.44)    | 5768.63 (5363.39-6151.96)  | 17.67 (16.4-18953.01)  | 6678.91 (6225.96-7102.83)   | 0.56 (0.52 to 0.59) |

1  
2  
3  
4  
5 **Supplemental table 2. Incidence cases and age-standardized incidence rate (ASIR) of chronic kidney disease in 1990 and 2019, and the temporal trends from**  
6 **1990 to 2019 in global and regions.**  
7  
8  
9  
10  
11  
12  
13  
14  
15  
16  
17  
18  
19  
20  
21  
22  
23  
24  
25  
26  
27  
28  
29  
30  
31  
32  
33  
34  
35  
36  
37  
38  
39  
40  
41  
42  
43  
44  
45  
46

For peer review only

| Characteristics               | 1990                                |                        | 2019                                |                        | 1990-2019             |
|-------------------------------|-------------------------------------|------------------------|-------------------------------------|------------------------|-----------------------|
|                               | Incidence cases (*10 <sup>6</sup> ) | ASIR per 100,000       | Incidence cases (*10 <sup>6</sup> ) | ASIR per 100,000       | EAPC of ASIR (95% CI) |
|                               | (95% UI)                            | population (95% UI)    | (95% UI)                            | population (95% UI)    |                       |
| Global                        | 7.8 (7.17-8485.39)                  | 192.45 (177.31-209.05) | 18.99 (17.56-20518.16)              | 233.65 (216.56-252.31) | 0.69 (0.68 to 0.7)    |
| <b>Gender</b>                 |                                     |                        |                                     |                        |                       |
| Males                         | 3.36 (3.09-3.65)                    | 179.21 (164.8-194.74)  | 8.51 (7.84-9.23)                    | 223.02 (206.07-241.18) | 0.69 (0.68 to 0.7)    |
| Females                       | 4.44 (4.08-4.84)                    | 203.64 (187.5-221.38)  | 10.47 (9.7-11.32)                   | 243.63 (225.94-262.66) | 0.69 (0.68 to 0.7)    |
| <b>Sociodemographic index</b> |                                     |                        |                                     |                        |                       |
| Low                           | 0.37 (0.34-398.17)                  | 123.72 (114.25-133.97) | 1.01 (0.93-1085.2)                  | 161.24 (148.07-175.64) | 0.95 (0.92 to 0.99)   |
| Low-middle                    | 1.05 (0.97-1139.39)                 | 149.68 (137.38-162.87) | 2.81 (2.58-3056.52)                 | 197.07 (181.51-214.36) | 0.91 (0.87 to 0.95)   |
| Middle                        | 1.95 (1.79-2127.2)                  | 172.4 (157.74-188.79)  | 5.87 (5.4-6373.37)                  | 235.71 (218.23-254.87) | 1.17 (1.14 to 1.2)    |
| High-middle                   | 1.78 (1.63-1952.09)                 | 168.37 (154.83-183.45) | 4.13 (3.8-4493.35)                  | 210.65 (194.34-228.37) | 0.89 (0.86 to 0.92)   |
| High                          | 2.64 (2.41-2883.51)                 | 252.66 (232.46-274.36) | 5.15 (4.75-5569.87)                 | 281.67 (260.21-303.81) | 0.28 (0.24 to 0.32)   |
| <b>21 GBD regions</b>         |                                     |                        |                                     |                        |                       |
| Central Asia                  | 0.07 (0.06-75.25)                   | 123.99 (113.45-135.88) | 0.16 (0.15-178.53)                  | 193.3 (176.73-211.27)  | 1.69 (1.52 to 1.87)   |

|    |                              |                     |                        |                     |                        |                      |
|----|------------------------------|---------------------|------------------------|---------------------|------------------------|----------------------|
| 1  |                              |                     |                        |                     |                        |                      |
| 2  |                              |                     |                        |                     |                        |                      |
| 3  |                              |                     |                        |                     |                        |                      |
| 4  |                              |                     |                        |                     |                        |                      |
| 5  |                              |                     |                        |                     |                        |                      |
| 6  | Central Europe               | 0.21 (0.19-229.95)  | 144.36 (131.43-158.87) | 0.44 (0.4-481.17)   | 216.5 (197.99-236.75)  | 1.21 (1.12 to 1.3)   |
| 7  |                              |                     |                        |                     |                        |                      |
| 8  | Eastern Europe               | 0.34 (0.3-370.22)   | 130.48 (119.44-142.71) | 0.54 (0.49-599.18)  | 181.85 (166.07-199.03) | 1.32 (1.15 to 1.49)  |
| 9  |                              |                     |                        |                     |                        |                      |
| 10 | Australasia                  | 0.06 (0.06-65.23)   | 254.5 (240.37-269.78)  | 0.14 (0.13-153.73)  | 286.14 (264.78-308.93) | 0.37 (0.33 to 0.41)  |
| 11 |                              |                     |                        |                     |                        |                      |
| 12 | High-income Asia Pacific     | 0.53 (0.49-577.29)  | 265.13 (244.47-287.79) | 1.21 (1.11-1315.46) | 277.51 (255.67-300.82) | 0.08 (0.04 to 0.13)  |
| 13 |                              |                     |                        |                     |                        |                      |
| 14 | High-income North America    | 1.04 (0.94-1140.52) | 295.47 (270.34-323.33) | 1.89 (1.73-2062.59) | 310.44 (284.74-336.3)  | 0.03 (-0.05 to 0.12) |
| 15 |                              |                     |                        |                     |                        |                      |
| 16 | Southern Latin America       | 0.1 (0.09-106.64)   | 211.66 (193.13-230.93) | 0.23 (0.22-253.7)   | 282.02 (260.12-304.6)  | 1.02 (0.93 to 1.1)   |
| 17 |                              |                     |                        |                     |                        |                      |
| 18 | Western Europe               | 1.28 (1.16-1410.45) | 216.75 (198.62-236.36) | 2.16 (1.99-2344.51) | 235.6 (216.93-254.91)  | 0.25 (0.2 to 0.3)    |
| 19 |                              |                     |                        |                     |                        |                      |
| 20 | Andean Latin America         | 0.04 (0.03-38.3)    | 154.8 (142.57-167.62)  | 0.16 (0.15-175.89)  | 288.34 (264.91-311.21) | 2.2 (2.09 to 2.3)    |
| 21 |                              |                     |                        |                     |                        |                      |
| 22 | Caribbean                    | 0.04 (0.04-48.74)   | 161.46 (148.31-176.22) | 0.13 (0.12-141.71)  | 256.39 (237.73-277)    | 1.58 (1.48 to 1.68)  |
| 23 |                              |                     |                        |                     |                        |                      |
| 24 | Central Latin America        | 0.27 (0.25-292.01)  | 276.65 (252.64-304.54) | 0.99 (0.93-1060.8)  | 409.61 (383.06-437.91) | 1.29 (1.21 to 1.36)  |
| 25 |                              |                     |                        |                     |                        |                      |
| 26 | Tropical Latin America       | 0.19 (0.18-210.14)  | 191.28 (176.52-209.33) | 0.6 (0.56-655.92)   | 250.85 (233.24-272.18) | 0.89 (0.82 to 0.96)  |
| 27 |                              |                     |                        |                     |                        |                      |
| 28 | North Africa and Middle East | 0.51 (0.47-550.25)  | 261.9 (240.97-285.91)  | 2.03 (1.88-2202.72) | 447.48 (415.13-482.83) | 1.97 (1.87 to 2.08)  |
| 29 |                              |                     |                        |                     |                        |                      |
| 30 | South Asia                   | 1.01 (0.93-1104.53) | 148.9 (136.4-162.57)   | 2.67 (2.43-2918.85) | 181.87 (165.91-198.75) | 0.61 (0.54 to 0.68)  |
| 31 |                              |                     |                        |                     |                        |                      |
| 32 | East Asia                    | 1.33 (1.21-1465.64) | 148.49 (135.05-163.27) | 3.27 (2.98-3599.05) | 164.52 (150.62-179.18) | 0.61 (0.51 to 0.7)   |
| 33 |                              |                     |                        |                     |                        |                      |
| 34 | Oceania                      | 0 (0-5.25)          | 122.53 (112.38-133.56) | 0.01 (0.01-14.89)   | 158.68 (145.3-172.89)  | 0.79 (0.74 to 0.84)  |
| 35 |                              |                     |                        |                     |                        |                      |
| 36 |                              |                     |                        |                     |                        |                      |
| 37 |                              |                     |                        |                     |                        |                      |
| 38 |                              |                     |                        |                     |                        |                      |
| 39 |                              |                     |                        |                     |                        |                      |
| 40 |                              |                     |                        |                     |                        |                      |
| 41 |                              |                     |                        |                     |                        |                      |
| 42 |                              |                     |                        |                     |                        |                      |
| 43 |                              |                     |                        |                     |                        |                      |
| 44 |                              |                     |                        |                     |                        |                      |
| 45 |                              |                     |                        |                     |                        |                      |
| 46 |                              |                     |                        |                     |                        |                      |



1  
2  
3  
4  
5  
6  
7  
8  
9  
10  
11  
12  
13  
14  
15  
16  
17  
18  
19  
20  
21  
22  
23  
24  
25  
26  
27  
28  
29  
30  
31  
32  
33  
34  
35  
36  
37  
38  
39  
40  
41  
42  
43  
44  
45  
46

|                             |                    |                        |                     |                        |                     |
|-----------------------------|--------------------|------------------------|---------------------|------------------------|---------------------|
| Southeast Asia              | 0.45 (0.42-491.19) | 152.65 (140.55-165.93) | 1.43 (1.31-1547.89) | 227.98 (210.24-246.38) | 1.4 (1.37 to 1.44)  |
| Central Sub-Saharan Africa  | 0.03 (0.03-30.16)  | 93.07 (86.17-100.24)   | 0.08 (0.08-89.02)   | 125.99 (115.7-136.67)  | 1.11 (1.01 to 1.2)  |
| Eastern Sub-Saharan Africa  | 0.09 (0.09-99.99)  | 94.39 (87.18-102.21)   | 0.24 (0.22-258.06)  | 119.54 (109.76-130.11) | 0.86 (0.78 to 0.93) |
| Southern Sub-Saharan Africa | 0.05 (0.05-57.56)  | 168.63 (154.1-184.7)   | 0.14 (0.13-149.6)   | 231.14 (212.43-251.73) | 1.04 (0.85 to 1.23) |
| Western Sub-Saharan Africa  | 0.16 (0.15-168.99) | 137.2 (126.96-148.29)  | 0.44 (0.41-470.76)  | 181.8 (167.29-197.54)  | 1.13 (1.01 to 1.24) |

1  
2  
3  
4  
5 **Supplemental table 3. DALYs and age-standardized DALYs rate (ASR-DALYs) of chronic kidney disease in 1990 and 2019, and the temporal trends from**  
6 **1990 to 2019 in global and regions.**  
7  
8  
9  
10  
11  
12  
13  
14  
15  
16  
17  
18  
19  
20  
21  
22  
23  
24  
25  
26  
27  
28  
29  
30  
31  
32  
33  
34  
35  
36  
37  
38  
39  
40  
41  
42  
43  
44  
45  
46

For peer review only

| Characteristics               | 1990                               |                                           | 2019                               |                                           | 1990-2019                  |
|-------------------------------|------------------------------------|-------------------------------------------|------------------------------------|-------------------------------------------|----------------------------|
|                               | DALYs (*10 <sup>6</sup> ) (95% UI) | ASR-DALYs per 100,000 population (95% UI) | DALYs (*10 <sup>6</sup> ) (95% UI) | ASR-DALYs per 100,000 population (95% UI) | EAPC of ASR-DALYs (95% CI) |
| Global                        | 21.5 (20.04-23065.78)              | 484.46 (452.28-518.67)                    | 41.54 (38.29-45037.86)             | 514.86 (474.91-558.86)                    | 0.31 (0.23 to 0.38)        |
| <b>Gender</b>                 |                                    |                                           |                                    |                                           |                            |
| Males                         | 11.2 (10.4-12.15)                  | 537.61 (499.52-580.01)                    | 21.98 (20.14-23.97)                | 574.23 (527.52-625.27)                    | 0.35 (0.27 to 0.43)        |
| Females                       | 10.3 (9.46-11.22)                  | 443.69 (409.36-481.56)                    | 19.56 (17.7-21.47)                 | 463.61 (419.34-509.95)                    | 0.21 (0.15 to 0.28)        |
| <b>Sociodemographic index</b> |                                    |                                           |                                    |                                           |                            |
| Low                           | 2.45 (2.18-2728.52)                | 734.23 (667.32-804.58)                    | 4.73 (4.21-5276.93)                | 682.18 (615.56-752.04)                    | -0.24 (-0.28 to -0.21)     |
| Low-middle                    | 5.05 (4.56-5598.22)                | 649.9 (591.82-714.59)                     | 9.91 (8.98-10820.22)               | 664.18 (603.21-723.92)                    | 0.1 (0 to 0.21)            |
| Middle                        | 7.55 (7.02-8112.98)                | 601.87 (560.14-645.51)                    | 15.44 (14.17-16837.37)             | 621.93 (570.74-676.64)                    | 0.27 (0.21 to 0.33)        |
| High-middle                   | 3.89 (3.6-4213.22)                 | 360.16 (332.75-390.43)                    | 6.05 (5.49-6665.14)                | 320.68 (290.18-353.73)                    | -0.36 (-0.46 to -0.27)     |
| High                          | 2.54 (2.33-2787.23)                | 254.32 (232.26-279.43)                    | 5.38 (4.87-5884.31)                | 304.13 (274.09-335.44)                    | 0.8 (0.72 to 0.89)         |
| <b>21 GBD regions</b>         |                                    |                                           |                                    |                                           |                            |
| Central Asia                  | 0.23 (0.22-256.33)                 | 397.89 (367.64-442.65)                    | 0.43 (0.39-481.73)                 | 506.72 (456.51-562.2)                     | 0.48 (0.16 to 0.79)        |

|    |                              |                     |                        |                     |                           |                        |
|----|------------------------------|---------------------|------------------------|---------------------|---------------------------|------------------------|
| 1  |                              |                     |                        |                     |                           |                        |
| 2  |                              |                     |                        |                     |                           |                        |
| 3  |                              |                     |                        |                     |                           |                        |
| 4  |                              |                     |                        |                     |                           |                        |
| 5  |                              |                     |                        |                     |                           |                        |
| 6  | Central Europe               | 0.41 (0.38-437.53)  | 297.3 (278.39-317.88)  | 0.46 (0.4-523.54)   | 243.84 (212.01-278.04)    | -0.62 (-0.69 to -0.55) |
| 7  |                              |                     |                        |                     |                           |                        |
| 8  | Eastern Europe               | 0.49 (0.45-547.25)  | 197 (177.48-218.85)    | 0.56 (0.49-638.34)  | 196.77 (170.51-224.02)    | -0.51 (-0.73 to -0.28) |
| 9  |                              |                     |                        |                     |                           |                        |
| 10 | Australasia                  | 0.04 (0.04-48.98)   | 196.75 (180.03-215.38) | 0.1 (0.09-115.71)   | 214.3 (191.2-238.39)      | 0.45 (0.4 to 0.5)      |
| 11 |                              |                     |                        |                     |                           |                        |
| 12 | High-income Asia Pacific     | 0.59 (0.55-642.57)  | 310.61 (285.7-334.9)   | 0.96 (0.84-1067.61) | 218.58 (192.71-243.9)     | -1.16 (-1.21 to -1.1)  |
| 13 |                              |                     |                        |                     |                           |                        |
| 14 | High-income North America    | 0.93 (0.85-1032.34) | 273.54 (247.51-303.34) | 2.42 (2.22-2641.09) | 413.63 (379.73-450.68)    | 1.69 (1.51 to 1.88)    |
| 15 |                              |                     |                        |                     |                           |                        |
| 16 | Southern Latin America       | 0.23 (0.22-245.13)  | 501.82 (472.93-530.86) | 0.44 (0.41-472.11)  | 540.08 (500.88-579.63)    | 0.25 (0.02 to 0.48)    |
| 17 |                              |                     |                        |                     |                           |                        |
| 18 | Western Europe               | 1.08 (0.99-1188.03) | 197.18 (179.66-216.97) | 1.75 (1.56-1921.1)  | 186.58 (166.88-208.38)    | -0.04 (-0.09 to 0.02)  |
| 19 |                              |                     |                        |                     |                           |                        |
| 20 | Andean Latin America         | 0.18 (0.17-196.15)  | 680.42 (626.59-742.08) | 0.48 (0.4-564.87)   | 836.34 (704.25-981.59)    | 0.84 (0.59 to 1.1)     |
| 21 |                              |                     |                        |                     |                           |                        |
| 22 | Caribbean                    | 0.17 (0.16-189.99)  | 587 (541.65-647.03)    | 0.39 (0.34-454.01)  | 774.89 (668-896.08)       | 1.32 (1.22 to 1.42)    |
| 23 |                              |                     |                        |                     |                           |                        |
| 24 | Central Latin America        | 0.78 (0.72-840.29)  | 739.23 (689.04-794.6)  | 3.28 (2.92-3697.82) | 1348.14 (1203.58-1521.61) | 2.3 (2.01 to 2.59)     |
| 25 |                              |                     |                        |                     |                           |                        |
| 26 | Tropical Latin America       | 0.61 (0.58-650.99)  | 559.23 (528.14-592.5)  | 1.24 (1.15-1332.95) | 513.36 (476.05-553.4)     | -0.37 (-0.46 to -0.29) |
| 27 |                              |                     |                        |                     |                           |                        |
| 28 | North Africa and Middle East | 1.77 (1.62-1930.04) | 834.93 (762.27-947.15) | 3.38 (2.92-3897.91) | 744.36 (646.14-851.75)    | -0.37 (-0.43 to -0.31) |
| 29 |                              |                     |                        |                     |                           |                        |
| 30 | South Asia                   | 4.69 (4.05-5324.9)  | 647.1 (557.75-731.83)  | 9.89 (8.8-11052.83) | 640.65 (568.76-715.48)    | -0.06 (-0.24 to 0.11)  |
| 31 |                              |                     |                        |                     |                           |                        |
| 32 | East Asia                    | 4.2 (3.73-4664.95)  | 416.47 (371.77-461.55) | 6.21 (5.36-7049.94) | 320.44 (277.88-362.19)    | -0.58 (-0.68 to -0.48) |
| 33 |                              |                     |                        |                     |                           |                        |
| 34 | Oceania                      | 0.03 (0.02-32.15)   | 664.24 (581.19-758.07) | 0.07 (0.06-83.48)   | 747.22 (629.25-880.16)    | 0.27 (0.09 to 0.44)    |
| 35 |                              |                     |                        |                     |                           |                        |
| 36 |                              |                     |                        |                     |                           |                        |
| 37 |                              |                     |                        |                     |                           |                        |
| 38 |                              |                     |                        |                     |                           |                        |
| 39 |                              |                     |                        |                     |                           |                        |
| 40 |                              |                     |                        |                     |                           |                        |
| 41 |                              |                     |                        |                     |                           |                        |
| 42 |                              |                     |                        |                     |                           |                        |
| 43 |                              |                     |                        |                     |                           |                        |
| 44 |                              |                     |                        |                     |                           |                        |
| 45 |                              |                     |                        |                     |                           |                        |
| 46 |                              |                     |                        |                     |                           |                        |

1  
2  
3  
4  
5  
6  
7  
8  
9  
10  
11  
12  
13  
14  
15  
16  
17  
18  
19  
20  
21  
22  
23  
24  
25  
26  
27  
28  
29  
30  
31  
32  
33  
34  
35  
36  
37  
38  
39  
40  
41  
42  
43  
44  
45  
46

|                             |                     |                        |                     |                        |                        |
|-----------------------------|---------------------|------------------------|---------------------|------------------------|------------------------|
| Southeast Asia              | 2.7 (2.49-2945.17)  | 806.56 (741.95-875.79) | 5.11 (4.61-5673.54) | 796.69 (720.03-881.21) | -0.02 (-0.07 to 0.03)  |
| Central Sub-Saharan Africa  | 0.26 (0.22-303.29)  | 769.07 (656.59-891.05) | 0.46 (0.37-563.41)  | 635.98 (510.34-766.78) | -0.73 (-0.77 to -0.7)  |
| Eastern Sub-Saharan Africa  | 0.84 (0.71-949.63)  | 752.43 (668.49-837.88) | 1.4 (1.21-1581.03)  | 626.45 (557.9-698.14)  | -0.73 (-0.77 to -0.69) |
| Southern Sub-Saharan Africa | 0.22 (0.2-249.55)   | 636.93 (576.23-723.35) | 0.5 (0.45-545.96)   | 803.81 (733.62-878.51) | 0.94 (0.63 to 1.25)    |
| Western Sub-Saharan Africa  | 1.03 (0.87-1218.24) | 813.99 (702.78-957.03) | 2.01 (1.67-2371.3)  | 738.79 (627.78-857.08) | -0.27 (-0.3 to -0.23)  |

**Supplemental table 4. Deaths and age-standardized death rate (ASDR) of chronic kidney disease in 1990 and 2019, and the temporal trends from 1990 to 2019 in 204 countries.**

| location            | Death cases in 1990 (*10 <sup>3</sup> ) | ASDR in 1990 (per 100,000 population) | Death cases in 2019 (*10 <sup>3</sup> ) | ASDR in 2019 (per 100,000 population) | EAPC of ASDR from 1990 to 2019 |
|---------------------|-----------------------------------------|---------------------------------------|-----------------------------------------|---------------------------------------|--------------------------------|
| Afghanistan         | 3.71 (2.82-5.06)                        | 55.94 (42.01-81.56)                   | 5.64 (4.33-7.92)                        | 49.37 (37.14-74.78)                   | -0.33 (-0.37 to -0.28)         |
| Albania             | 0.24 (0.22-0.26)                        | 11.53 (10.65-12.4)                    | 0.33 (0.25-0.42)                        | 8.24 (6.22-10.66)                     | -1.1 (-1.34 to -0.86)          |
| Algeria             | 3.56 (2.74-4.96)                        | 38.73 (30.35-52.07)                   | 8.2 (6.35-10.89)                        | 31.57 (24.78-41.16)                   | -0.5 (-0.67 to -0.33)          |
| American Samoa      | 0.01 (0.01-0.01)                        | 40.55 (34.26-46.31)                   | 0.03 (0.02-0.03)                        | 59.34 (51.03-69)                      | 1.41 (1.28 to 1.55)            |
| Andorra             | 0 (0-0.01)                              | 11.21 (8.79-14.36)                    | 0.02 (0.01-0.02)                        | 9.86 (7.46-12.24)                     | -0.39 (-0.57 to -0.2)          |
| Angola              | 1.06 (0.76-1.34)                        | 27.03 (19.77-33.28)                   | 2.46 (1.73-3.16)                        | 24.77 (17.36-31.37)                   | -0.37 (-0.42 to -0.33)         |
| Antigua and Barbuda | 0.01 (0.01-0.02)                        | 26.3 (23.81-28.66)                    | 0.04 (0.03-0.04)                        | 39.05 (33.55-45.31)                   | 1.69 (1.48 to 1.91)            |
| Argentina           | 7.13 (6.72-7.54)                        | 23.49 (22.02-24.9)                    | 15.66 (14.21-17.05)                     | 28.36 (25.83-30.9)                    | 0.57 (0.27 to 0.88)            |
| Armenia             | 0.07 (0.06-0.07)                        | 3.03 (2.76-3.3)                       | 0.45 (0.38-0.52)                        | 11.35 (9.53-13.22)                    | 4.65 (4.33 to 4.97)            |
| Australia           | 1.71 (1.56-1.83)                        | 9.49 (8.57-10.15)                     | 5.21 (4.29-5.89)                        | 10.75 (9.03-12.08)                    | 0.62 (0.51 to 0.74)            |

|    |                                  |                  |                     |                     |                     |                        |
|----|----------------------------------|------------------|---------------------|---------------------|---------------------|------------------------|
| 1  |                                  |                  |                     |                     |                     |                        |
| 2  |                                  |                  |                     |                     |                     |                        |
| 3  |                                  |                  |                     |                     |                     |                        |
| 4  |                                  |                  |                     |                     |                     |                        |
| 5  | Austria                          | 0.74 (0.68-0.79) | 6.13 (5.62-6.53)    | 3.37 (2.86-3.73)    | 14.87 (12.79-16.36) | 4.46 (3.94 to 4.98)    |
| 6  |                                  |                  |                     |                     |                     |                        |
| 7  |                                  |                  |                     |                     |                     |                        |
| 8  | Azerbaijan                       | 0.53 (0.47-0.59) | 9.6 (8.55-10.9)     | 1.39 (1.16-1.63)    | 17.85 (14.56-20.65) | 2.69 (2.23 to 3.16)    |
| 9  |                                  |                  |                     |                     |                     |                        |
| 10 | Bahamas                          | 0.04 (0.03-0.04) | 24.48 (22.11-26.99) | 0.11 (0.09-0.14)    | 30.35 (24.98-36.57) | 1.14 (0.98 to 1.3)     |
| 11 |                                  |                  |                     |                     |                     |                        |
| 12 |                                  |                  |                     |                     |                     |                        |
| 13 | Bahrain                          | 0.04 (0.04-0.05) | 38.45 (31.97-46.81) | 0.18 (0.14-0.22)    | 34.82 (27.94-42.19) | -0.09 (-0.63 to 0.45)  |
| 14 |                                  |                  |                     |                     |                     |                        |
| 15 |                                  |                  |                     |                     |                     |                        |
| 16 | Bangladesh                       | 7.7 (5.05-9.75)  | 13.66 (10.12-16.55) | 12.78 (10.18-15.68) | 10.9 (8.74-13.31)   | -0.56 (-0.91 to -0.2)  |
| 17 |                                  |                  |                     |                     |                     |                        |
| 18 | Barbados                         | 0.05 (0.05-0.06) | 18.45 (17.07-19.95) | 0.12 (0.1-0.14)     | 25.66 (21.37-30.06) | 1.14 (0.93 to 1.35)    |
| 19 |                                  |                  |                     |                     |                     |                        |
| 20 |                                  |                  |                     |                     |                     |                        |
| 21 | Belarus                          | 0.28 (0.26-0.29) | 2.32 (2.15-2.46)    | 0.5 (0.4-0.62)      | 3.2 (2.57-3.97)     | 1.48 (0.93 to 2.04)    |
| 22 |                                  |                  |                     |                     |                     |                        |
| 23 | Belgium                          | 1.42 (1.3-1.53)  | 9.13 (8.31-9.81)    | 2.96 (2.5-3.34)     | 9.89 (8.49-11.03)   | 0.38 (0.28 to 0.48)    |
| 24 |                                  |                  |                     |                     |                     |                        |
| 25 |                                  |                  |                     |                     |                     |                        |
| 26 | Belize                           | 0.02 (0.02-0.02) | 22.74 (20.41-25.07) | 0.11 (0.1-0.13)     | 40.49 (35.02-46.66) | 2.2 (1.72 to 2.69)     |
| 27 |                                  |                  |                     |                     |                     |                        |
| 28 |                                  |                  |                     |                     |                     |                        |
| 29 | Benin                            | 0.75 (0.64-0.87) | 35.15 (30.27-40.77) | 1.58 (1.19-2.06)    | 32.41 (25.19-40.64) | -0.15 (-0.23 to -0.07) |
| 30 |                                  |                  |                     |                     |                     |                        |
| 31 | Bermuda                          | 0.01 (0.01-0.01) | 16.94 (15.52-18.34) | 0.02 (0.02-0.02)    | 14.55 (12.11-17.38) | -0.18 (-0.35 to -0.01) |
| 32 |                                  |                  |                     |                     |                     |                        |
| 33 |                                  |                  |                     |                     |                     |                        |
| 34 | Bhutan                           | 0.06 (0.04-0.08) | 22.36 (14.86-31.31) | 0.15 (0.1-0.19)     | 28.1 (20.41-35.31)  | 0.86 (0.81 to 0.91)    |
| 35 |                                  |                  |                     |                     |                     |                        |
| 36 | Bolivia (Plurinational State of) | 1.23 (1.02-1.52) | 39.15 (32.12-49.14) | 4.42 (3.41-5.56)    | 55.89 (43.24-69.91) | 1.3 (1.23 to 1.38)     |
| 37 |                                  |                  |                     |                     |                     |                        |
| 38 |                                  |                  |                     |                     |                     |                        |
| 39 |                                  |                  |                     |                     |                     |                        |
| 40 |                                  |                  |                     |                     |                     |                        |
| 41 |                                  |                  |                     |                     |                     |                        |
| 42 |                                  |                  |                     |                     |                     |                        |
| 43 |                                  |                  |                     |                     |                     |                        |
| 44 |                                  |                  |                     |                     |                     |                        |
| 45 |                                  |                  |                     |                     |                     |                        |
| 46 |                                  |                  |                     |                     |                     |                        |

|    |                          |                    |                     |                     |                     |                        |
|----|--------------------------|--------------------|---------------------|---------------------|---------------------|------------------------|
| 1  |                          |                    |                     |                     |                     |                        |
| 2  |                          |                    |                     |                     |                     |                        |
| 3  |                          |                    |                     |                     |                     |                        |
| 4  |                          |                    |                     |                     |                     |                        |
| 5  | Bosnia and Herzegovina   | 0.34 (0.32-0.36)   | 9.3 (8.68-9.91)     | 0.66 (0.53-0.8)     | 11.56 (9.29-14.09)  | 0.8 (0.55 to 1.05)     |
| 6  |                          |                    |                     |                     |                     |                        |
| 7  |                          |                    |                     |                     |                     |                        |
| 8  | Botswana                 | 0.14 (0.1-0.19)    | 27.26 (20.38-37.49) | 0.44 (0.31-0.61)    | 37.05 (26.41-49.7)  | 0.64 (0.29 to 0.99)    |
| 9  |                          |                    |                     |                     |                     |                        |
| 10 | Brazil                   | 16.25 (15.53-16.8) | 19.48 (18.27-20.26) | 42.34 (38.66-44.67) | 18.6 (16.9-19.66)   | -0.09 (-0.17 to -0.02) |
| 11 |                          |                    |                     |                     |                     |                        |
| 12 |                          |                    |                     |                     |                     |                        |
| 13 | Brunei Darussalam        | 0.03 (0.03-0.03)   | 36.65 (32.22-41.02) | 0.08 (0.07-0.09)    | 37 (32.83-41.35)    | 0.74 (0.49 to 0.99)    |
| 14 |                          |                    |                     |                     |                     |                        |
| 15 |                          |                    |                     |                     |                     |                        |
| 16 | Bulgaria                 | 0.75 (0.7-0.79)    | 6.89 (6.49-7.29)    | 1.95 (1.58-2.38)    | 14.23 (11.57-17.43) | 2.68 (2.32 to 3.05)    |
| 17 |                          |                    |                     |                     |                     |                        |
| 18 | Burkina Faso             | 1.25 (1.03-1.48)   | 30.19 (25.23-35.72) | 2.82 (2.28-3.4)     | 30.98 (25.71-36.7)  | 0.03 (-0.07 to 0.13)   |
| 19 |                          |                    |                     |                     |                     |                        |
| 20 |                          |                    |                     |                     |                     |                        |
| 21 | Burundi                  | 0.74 (0.58-0.94)   | 31.09 (24.22-39.09) | 1.04 (0.81-1.33)    | 25.11 (19.84-31.23) | -1 (-1.1 to -0.9)      |
| 22 |                          |                    |                     |                     |                     |                        |
| 23 |                          |                    |                     |                     |                     |                        |
| 24 | Cabo Verde               | 0.04 (0.03-0.04)   | 15.38 (13.65-18.09) | 0.1 (0.09-0.12)     | 24.42 (21.5-27.42)  | 0.8 (0.48 to 1.12)     |
| 25 |                          |                    |                     |                     |                     |                        |
| 26 | Cambodia                 | 1.17 (0.97-1.38)   | 23.11 (19.27-27.26) | 2.19 (1.77-2.6)     | 19.77 (16.16-22.88) | -0.64 (-0.73 to -0.56) |
| 27 |                          |                    |                     |                     |                     |                        |
| 28 |                          |                    |                     |                     |                     |                        |
| 29 | Cameroon                 | 1.93 (1.49-2.38)   | 46.32 (35.64-56.56) | 4.78 (3.53-6.3)     | 42.01 (31.74-53.82) | -0.29 (-0.36 to -0.22) |
| 30 |                          |                    |                     |                     |                     |                        |
| 31 | Canada                   | 2.64 (2.38-2.83)   | 8.44 (7.58-9.05)    | 7.5 (6.43-8.41)     | 9.67 (8.4-10.78)    | 0.22 (0.1 to 0.34)     |
| 32 |                          |                    |                     |                     |                     |                        |
| 33 |                          |                    |                     |                     |                     |                        |
| 34 | Central African Republic | 0.36 (0.27-0.45)   | 31.47 (23.87-38.91) | 0.65 (0.48-0.86)    | 31.44 (23.07-40.76) | 0.05 (-0.07 to 0.16)   |
| 35 |                          |                    |                     |                     |                     |                        |
| 36 | Chad                     | 0.92 (0.71-1.28)   | 31.71 (24.21-44.14) | 1.82 (1.36-2.4)     | 31.47 (24.21-40.94) | 0.04 (-0.05 to 0.14)   |
| 37 |                          |                    |                     |                     |                     |                        |
| 38 |                          |                    |                     |                     |                     |                        |
| 39 |                          |                    |                     |                     |                     |                        |
| 40 |                          |                    |                     |                     |                     |                        |
| 41 |                          |                    |                     |                     |                     |                        |
| 42 |                          |                    |                     |                     |                     |                        |
| 43 |                          |                    |                     |                     |                     |                        |
| 44 |                          |                    |                     |                     |                     |                        |
| 45 |                          |                    |                     |                     |                     |                        |
| 46 |                          |                    |                     |                     |                     |                        |



1  
2  
3  
4  
5  
6  
7  
8  
9  
10  
11  
12  
13  
14  
15  
16  
17  
18  
19  
20  
21  
22  
23  
24  
25  
26  
27  
28  
29  
30  
31  
32  
33  
34  
35  
36  
37  
38  
39  
40  
41  
42  
43  
44  
45  
46

|                                       |                     |                     |                        |                     |                        |
|---------------------------------------|---------------------|---------------------|------------------------|---------------------|------------------------|
| Chile                                 | 1.35 (1.28-1.42)    | 15.12 (14.14-15.91) | 5.04 (4.47-5.49)       | 21.2 (18.81-23.09)  | 1.54 (1.18 to 1.91)    |
| China                                 | 98.61 (86.8-111.08) | 12.98 (11.52-14.53) | 196.73 (168.24-224.68) | 11.23 (9.63-12.77)  | -0.21 (-0.32 to -0.09) |
| Colombia                              | 3.56 (3.35-3.74)    | 21.24 (19.51-22.52) | 9.5 (7.33-11.97)       | 17.48 (13.59-22.1)  | -0.65 (-0.81 to -0.5)  |
| Comoros                               | 0.06 (0.04-0.08)    | 28.88 (19.76-36.55) | 0.12 (0.1-0.14)        | 26.32 (22.01-31.51) | -0.51 (-0.64 to -0.38) |
| Congo                                 | 0.37 (0.26-0.46)    | 36.99 (26.02-46.61) | 0.7 (0.48-0.92)        | 31.9 (21.82-40.63)  | -0.68 (-0.79 to -0.56) |
| Cook Islands                          | 0 (0-0)             | 23.6 (19.81-27.56)  | 0.01 (0.01-0.01)       | 29.72 (24.86-35)    | 0.99 (0.9 to 1.07)     |
| Costa Rica                            | 0.26 (0.24-0.27)    | 14.97 (13.7-16.1)   | 1.37 (1.08-1.71)       | 26.61 (20.83-33.09) | 1.89 (1.41 to 2.37)    |
| Croatia                               | 0.43 (0.39-0.46)    | 7.27 (6.69-7.85)    | 0.92 (0.74-1.14)       | 9.7 (7.84-11.9)     | 0.93 (0.56 to 1.3)     |
| Cuba                                  | 0.82 (0.77-0.86)    | 7.98 (7.53-8.38)    | 2.73 (2.24-3.32)       | 14.43 (11.8-17.53)  | 2.61 (2.35 to 2.86)    |
| Cyprus                                | 0.18 (0.16-0.21)    | 33.7 (29.01-39.16)  | 0.33 (0.29-0.38)       | 20.62 (17.88-23.26) | -2.01 (-2.19 to -1.83) |
| Czechia                               | 1.08 (1.03-1.13)    | 8.09 (7.7-8.44)     | 1.32 (1.07-1.56)       | 6 (4.88-7.14)       | -0.94 (-1.08 to -0.8)  |
| Democratic People's Republic of Korea | 2.38 (1.86-2.97)    | 15.72 (12.48-19.16) | 4.32 (3.51-5.28)       | 14.24 (11.58-17.26) | -0.28 (-0.41 to -0.14) |
| Democratic Republic of the Congo      | 4.42 (3.69-5.24)    | 30.47 (25.83-35.58) | 8.03 (6.4-9.93)        | 24.79 (19.49-30.7)  | -0.81 (-0.85 to -0.77) |

|    |                    |                  |                     |                     |                     |                       |
|----|--------------------|------------------|---------------------|---------------------|---------------------|-----------------------|
| 1  |                    |                  |                     |                     |                     |                       |
| 2  |                    |                  |                     |                     |                     |                       |
| 3  |                    |                  |                     |                     |                     |                       |
| 4  |                    |                  |                     |                     |                     |                       |
| 5  | Denmark            | 0.37 (0.34-0.4)  | 4.43 (4.05-4.75)    | 1.13 (0.98-1.26)    | 8.8 (7.65-9.71)     | 2.37 (1.93 to 2.8)    |
| 6  |                    |                  |                     |                     |                     |                       |
| 7  |                    |                  |                     |                     |                     |                       |
| 8  | Djibouti           | 0.03 (0.02-0.04) | 23.64 (17.63-30.82) | 0.14 (0.1-0.18)     | 28.41 (22.57-36.87) | 0.58 (0.48 to 0.68)   |
| 9  |                    |                  |                     |                     |                     |                       |
| 10 | Dominica           | 0.03 (0.02-0.03) | 35.66 (32.01-39.51) | 0.04 (0.04-0.05)    | 48.01 (39.68-57.88) | 1.35 (1.23 to 1.47)   |
| 11 |                    |                  |                     |                     |                     |                       |
| 12 |                    |                  |                     |                     |                     |                       |
| 13 | Dominican Republic | 0.58 (0.52-0.65) | 15.07 (13.33-16.88) | 2.28 (1.69-3.04)    | 24.98 (18.71-33.09) | 2.79 (2.47 to 3.12)   |
| 14 |                    |                  |                     |                     |                     |                       |
| 15 | Ecuador            | 1.09 (1.02-1.15) | 20.77 (19.27-22.14) | 6.91 (5.55-8.62)    | 50.48 (40.61-62.49) | 3.43 (2.76 to 4.11)   |
| 16 |                    |                  |                     |                     |                     |                       |
| 17 |                    |                  |                     |                     |                     |                       |
| 18 | Egypt              | 9.72 (6.8-11.83) | 39.39 (27.32-49.32) | 21.98 (12.86-31.56) | 43.93 (26.96-61.79) | 0.54 (0.44 to 0.64)   |
| 19 |                    |                  |                     |                     |                     |                       |
| 20 |                    |                  |                     |                     |                     |                       |
| 21 | El Salvador        | 0.62 (0.58-0.67) | 20.12 (18.68-21.65) | 4.08 (3.09-5.23)    | 67.31 (50.85-86.63) | 4.43 (3.7 to 5.16)    |
| 22 |                    |                  |                     |                     |                     |                       |
| 23 | Equatorial Guinea  | 0.06 (0.04-0.07) | 29.32 (21.77-37.03) | 0.14 (0.1-0.19)     | 32.78 (23.73-43.75) | 0.54 (0.39 to 0.69)   |
| 24 |                    |                  |                     |                     |                     |                       |
| 25 |                    |                  |                     |                     |                     |                       |
| 26 | Eritrea            | 0.25 (0.17-0.34) | 24.73 (15.94-35.35) | 0.66 (0.45-0.92)    | 27.87 (19.48-38.08) | 0.3 (0.14 to 0.46)    |
| 27 |                    |                  |                     |                     |                     |                       |
| 28 |                    |                  |                     |                     |                     |                       |
| 29 | Estonia            | 0.05 (0.05-0.06) | 2.72 (2.52-2.94)    | 0.35 (0.28-0.43)    | 11.33 (9.07-13.93)  | 5.36 (4.91 to 5.81)   |
| 30 |                    |                  |                     |                     |                     |                       |
| 31 | Eswatini           | 0.1 (0.08-0.13)  | 37.13 (29.77-45.05) | 0.27 (0.19-0.36)    | 51.29 (37.88-66.11) | 1.28 (0.67 to 1.89)   |
| 32 |                    |                  |                     |                     |                     |                       |
| 33 |                    |                  |                     |                     |                     |                       |
| 34 | Ethiopia           | 7.86 (6.41-9.38) | 39.59 (32.49-46.12) | 9.86 (8.58-11.29)   | 26.17 (22.48-30.08) | -1.62 (-1.7 to -1.55) |
| 35 |                    |                  |                     |                     |                     |                       |
| 36 | Fiji               | 0.12 (0.09-0.14) | 34.34 (28.19-43.41) | 0.29 (0.23-0.37)    | 46.74 (37.81-57.1)  | 0.55 (0.17 to 0.93)   |
| 37 |                    |                  |                     |                     |                     |                       |
| 38 |                    |                  |                     |                     |                     |                       |
| 39 |                    |                  |                     |                     |                     |                       |
| 40 |                    |                  |                     |                     |                     |                       |
| 41 |                    |                  |                     |                     |                     |                       |
| 42 |                    |                  |                     |                     |                     |                       |
| 43 |                    |                  |                     |                     |                     |                       |
| 44 |                    |                  |                     |                     |                     |                       |
| 45 |                    |                  |                     |                     |                     |                       |
| 46 |                    |                  |                     |                     |                     |                       |

|    |           |                  |                     |                     |                     |                        |
|----|-----------|------------------|---------------------|---------------------|---------------------|------------------------|
| 1  |           |                  |                     |                     |                     |                        |
| 2  |           |                  |                     |                     |                     |                        |
| 3  |           |                  |                     |                     |                     |                        |
| 4  |           |                  |                     |                     |                     |                        |
| 5  | Finland   | 0.21 (0.2-0.23)  | 3.08 (2.8-3.3)      | 0.71 (0.59-0.79)    | 4.69 (4.01-5.26)    | 2.13 (1.9 to 2.37)     |
| 6  |           |                  |                     |                     |                     |                        |
| 7  |           |                  |                     |                     |                     |                        |
| 8  | France    | 7.12 (6.35-7.72) | 7.99 (7.12-8.64)    | 12.7 (10.29-14.62)  | 6.59 (5.48-7.46)    | -0.39 (-0.52 to -0.26) |
| 9  |           |                  |                     |                     |                     |                        |
| 10 | Gabon     | 0.18 (0.13-0.23) | 35.51 (25.47-44.37) | 0.37 (0.23-0.48)    | 41.2 (25.46-53.69)  | 0.46 (0.25 to 0.67)    |
| 11 |           |                  |                     |                     |                     |                        |
| 12 |           |                  |                     |                     |                     |                        |
| 13 | Gambia    | 0.11 (0.08-0.14) | 31.8 (25.23-39.71)  | 0.31 (0.24-0.39)    | 33.3 (27.05-40.97)  | 0.1 (-0.01 to 0.22)    |
| 14 |           |                  |                     |                     |                     |                        |
| 15 | Georgia   | 0.35 (0.31-0.39) | 6.2 (5.54-6.88)     | 0.71 (0.59-0.82)    | 11.89 (9.98-13.83)  | 3.59 (2.83 to 4.35)    |
| 16 |           |                  |                     |                     |                     |                        |
| 17 |           |                  |                     |                     |                     |                        |
| 18 | Germany   | 9.35 (8.69-9.9)  | 7.04 (6.55-7.43)    | 35.22 (30.38-39.03) | 14.7 (12.69-16.19)  | 3.54 (3.2 to 3.89)     |
| 19 |           |                  |                     |                     |                     |                        |
| 20 |           |                  |                     |                     |                     |                        |
| 21 | Ghana     | 1.66 (1.25-2.22) | 27.97 (21.27-36.97) | 4.68 (3.38-5.96)    | 31.79 (23.14-39.85) | 0.55 (0.44 to 0.66)    |
| 22 |           |                  |                     |                     |                     |                        |
| 23 | Greece    | 2.95 (2.71-3.17) | 20.63 (18.81-22.08) | 4.6 (4.02-5.09)     | 14.96 (13.36-16.41) | -1.62 (-2.08 to -1.16) |
| 24 |           |                  |                     |                     |                     |                        |
| 25 |           |                  |                     |                     |                     |                        |
| 26 | Greenland | 0 (0-0)          | 13.2 (11.48-15.22)  | 0.01 (0.01-0.01)    | 13.87 (11.51-16.31) | 0.22 (0.11 to 0.34)    |
| 27 |           |                  |                     |                     |                     |                        |
| 28 |           |                  |                     |                     |                     |                        |
| 29 | Grenada   | 0.03 (0.02-0.03) | 34.89 (31.52-38.34) | 0.05 (0.04-0.06)    | 47.49 (41.83-52.74) | 1.47 (1.3 to 1.64)     |
| 30 |           |                  |                     |                     |                     |                        |
| 31 | Guam      | 0.01 (0.01-0.02) | 24.88 (21.94-27.8)  | 0.06 (0.05-0.07)    | 29.97 (25.2-35.61)  | 0.9 (0.61 to 1.19)     |
| 32 |           |                  |                     |                     |                     |                        |
| 33 |           |                  |                     |                     |                     |                        |
| 34 | Guatemala | 1.14 (1.02-1.27) | 32.23 (28.9-35.79)  | 6.02 (4.81-7.5)     | 57.06 (46.4-70.3)   | 2.65 (2.29 to 3.01)    |
| 35 |           |                  |                     |                     |                     |                        |
| 36 | Guinea    | 1.25 (1.01-1.59) | 37.28 (30.01-47.69) | 1.93 (1.51-2.42)    | 34.24 (27.19-42.48) | -0.1 (-0.17 to -0.02)  |
| 37 |           |                  |                     |                     |                     |                        |
| 38 |           |                  |                     |                     |                     |                        |
| 39 |           |                  |                     |                     |                     |                        |
| 40 |           |                  |                     |                     |                     |                        |
| 41 |           |                  |                     |                     |                     |                        |
| 42 |           |                  |                     |                     |                     |                        |
| 43 |           |                  |                     |                     |                     |                        |
| 44 |           |                  |                     |                     |                     |                        |
| 45 |           |                  |                     |                     |                     |                        |
| 46 |           |                  |                     |                     |                     |                        |

|    |                            |                      |                     |                        |                     |                        |
|----|----------------------------|----------------------|---------------------|------------------------|---------------------|------------------------|
| 1  |                            |                      |                     |                        |                     |                        |
| 2  |                            |                      |                     |                        |                     |                        |
| 3  |                            |                      |                     |                        |                     |                        |
| 4  |                            |                      |                     |                        |                     |                        |
| 5  | Guinea-Bissau              | 0.21 (0.17-0.27)     | 50.78 (40.95-61.44) | 0.29 (0.23-0.36)       | 40.52 (32.1-49.72)  | -0.74 (-0.78 to -0.7)  |
| 6  |                            |                      |                     |                        |                     |                        |
| 7  |                            |                      |                     |                        |                     |                        |
| 8  | Guyana                     | 0.11 (0.1-0.13)      | 29.17 (25.4-33.04)  | 0.28 (0.22-0.36)       | 47.17 (37.07-58.98) | 2.38 (2.15 to 2.61)    |
| 9  |                            |                      |                     |                        |                     |                        |
| 10 | Haiti                      | 1.18 (0.91-1.64)     | 34.39 (26-50.81)    | 2.37 (1.67-3.61)       | 34.33 (24.49-52.97) | 0.32 (0.18 to 0.47)    |
| 11 |                            |                      |                     |                        |                     |                        |
| 12 |                            |                      |                     |                        |                     |                        |
| 13 | Honduras                   | 0.56 (0.45-0.78)     | 26.05 (20.21-38.44) | 3.16 (2.57-4.03)       | 55.87 (45.6-71.19)  | 3.09 (2.81 to 3.37)    |
| 14 |                            |                      |                     |                        |                     |                        |
| 15 | Hungary                    | 0.78 (0.74-0.82)     | 5.84 (5.51-6.11)    | 1.82 (1.52-2.17)       | 8.92 (7.43-10.6)    | 2.57 (2.18 to 2.97)    |
| 16 |                            |                      |                     |                        |                     |                        |
| 17 |                            |                      |                     |                        |                     |                        |
| 18 | Iceland                    | 0.01 (0.01-0.01)     | 4.19 (3.74-4.58)    | 0.03 (0.03-0.04)       | 4.98 (4.14-5.69)    | 0.89 (0.75 to 1.03)    |
| 19 |                            |                      |                     |                        |                     |                        |
| 20 |                            |                      |                     |                        |                     |                        |
| 21 | India                      | 92.81 (79.36-104.72) | 22.76 (19.35-25.79) | 222.92 (191.55-258.59) | 20.92 (17.98-24.08) | -0.55 (-0.77 to -0.33) |
| 22 |                            |                      |                     |                        |                     |                        |
| 23 | Indonesia                  | 22.38 (20.04-24.93)  | 21.08 (18.79-23.69) | 42.13 (35.88-48.3)     | 20.95 (17.92-23.36) | 0 (-0.13 to 0.12)      |
| 24 |                            |                      |                     |                        |                     |                        |
| 25 |                            |                      |                     |                        |                     |                        |
| 26 | Iran (Islamic Republic of) | 5.27 (4.82-5.77)     | 24.11 (21.79-28.8)  | 12.55 (11.38-13.41)    | 19.77 (17.77-21.21) | -0.89 (-0.98 to -0.79) |
| 27 |                            |                      |                     |                        |                     |                        |
| 28 |                            |                      |                     |                        |                     |                        |
| 29 | Iraq                       | 3.46 (2.82-4.48)     | 46.27 (37.12-61.87) | 7.89 (6.16-10.08)      | 41.86 (33.19-53.49) | -0.42 (-0.48 to -0.35) |
| 30 |                            |                      |                     |                        |                     |                        |
| 31 | Ireland                    | 0.42 (0.39-0.44)     | 10.95 (10.02-11.65) | 0.7 (0.59-0.79)        | 8.89 (7.57-9.94)    | -0.71 (-0.79 to -0.64) |
| 32 |                            |                      |                     |                        |                     |                        |
| 33 |                            |                      |                     |                        |                     |                        |
| 34 | Israel                     | 0.96 (0.88-1.02)     | 21.9 (19.96-23.41)  | 2.76 (2.37-3.06)       | 21.48 (18.66-23.71) | 0.28 (-0.04 to 0.6)    |
| 35 |                            |                      |                     |                        |                     |                        |
| 36 | Italy                      | 8.39 (7.89-8.68)     | 9.78 (9.09-10.16)   | 16.51 (13.88-18.05)    | 8.6 (7.37-9.33)     | -0.17 (-0.31 to -0.04) |
| 37 |                            |                      |                     |                        |                     |                        |
| 38 |                            |                      |                     |                        |                     |                        |
| 39 |                            |                      |                     |                        |                     |                        |
| 40 |                            |                      |                     |                        |                     |                        |
| 41 |                            |                      |                     |                        |                     |                        |
| 42 |                            |                      |                     |                        |                     |                        |
| 43 |                            |                      |                     |                        |                     |                        |
| 44 |                            |                      |                     |                        |                     |                        |
| 45 |                            |                      |                     |                        |                     |                        |
| 46 |                            |                      |                     |                        |                     |                        |

|    |                                  |                     |                     |                     |                     |                        |
|----|----------------------------------|---------------------|---------------------|---------------------|---------------------|------------------------|
| 1  |                                  |                     |                     |                     |                     |                        |
| 2  |                                  |                     |                     |                     |                     |                        |
| 3  |                                  |                     |                     |                     |                     |                        |
| 4  |                                  |                     |                     |                     |                     |                        |
| 5  | Ivory Coast                      | 1.57 (1.27-1.87)    | 40.34 (33.8-47.23)  | 3.43 (2.59-4.33)    | 34.73 (28.03-42.22) | -0.61 (-0.73 to -0.49) |
| 6  |                                  |                     |                     |                     |                     |                        |
| 7  |                                  |                     |                     |                     |                     |                        |
| 8  | Jamaica                          | 0.43 (0.39-0.46)    | 23.34 (21.34-24.93) | 0.94 (0.76-1.15)    | 30.23 (24.24-37.39) | 0.3 (-0.21 to 0.82)    |
| 9  |                                  |                     |                     |                     |                     |                        |
| 10 | Japan                            | 19.48 (17.92-20.33) | 12.85 (11.7-13.48)  | 45.32 (35.35-51.15) | 8.87 (7.24-9.83)    | -1.44 (-1.54 to -1.34) |
| 11 |                                  |                     |                     |                     |                     |                        |
| 12 |                                  |                     |                     |                     |                     |                        |
| 13 | Jordan                           | 0.44 (0.37-0.51)    | 40.92 (34.47-48.38) | 1.81 (1.52-2.15)    | 36.65 (30.74-43.21) | -0.28 (-0.4 to -0.15)  |
| 14 |                                  |                     |                     |                     |                     |                        |
| 15 |                                  |                     |                     |                     |                     |                        |
| 16 | Kazakhstan                       | 0.97 (0.91-1.05)    | 7.34 (6.89-7.89)    | 1.87 (1.64-2.13)    | 11.79 (10.31-13.3)  | 1.12 (0.79 to 1.45)    |
| 17 |                                  |                     |                     |                     |                     |                        |
| 18 | Kenya                            | 1.62 (1.36-1.94)    | 20.91 (17.39-25.31) | 4.76 (3.99-5.64)    | 25.35 (21.47-29.6)  | 0.75 (0.67 to 0.82)    |
| 19 |                                  |                     |                     |                     |                     |                        |
| 20 |                                  |                     |                     |                     |                     |                        |
| 21 | Kiribati                         | 0.02 (0.01-0.02)    | 44.1 (36.16-52.87)  | 0.04 (0.03-0.05)    | 56.87 (43.53-72.81) | 0.6 (0.19 to 1.02)     |
| 22 |                                  |                     |                     |                     |                     |                        |
| 23 |                                  |                     |                     |                     |                     |                        |
| 24 | Kuwait                           | 0.14 (0.12-0.15)    | 27.67 (23.81-30.52) | 0.32 (0.27-0.39)    | 16.18 (13.28-19.5)  | -2.21 (-2.93 to -1.48) |
| 25 |                                  |                     |                     |                     |                     |                        |
| 26 | Kyrgyzstan                       | 0.43 (0.39-0.47)    | 12.46 (11.34-13.65) | 0.49 (0.42-0.56)    | 9.8 (8.54-11.16)    | -1.37 (-1.82 to -0.93) |
| 27 |                                  |                     |                     |                     |                     |                        |
| 28 |                                  |                     |                     |                     |                     |                        |
| 29 | Lao People's Democratic Republic | 1.08 (0.85-1.35)    | 50.84 (39.68-64.92) | 1.71 (1.31-2.18)    | 41.81 (32.97-51.98) | -0.85 (-0.92 to -0.78) |
| 30 |                                  |                     |                     |                     |                     |                        |
| 31 | Latvia                           | 0.08 (0.07-0.08)    | 2.33 (2.17-2.5)     | 0.26 (0.22-0.32)    | 6.22 (5.25-7.5)     | 4.52 (4 to 5.05)       |
| 32 |                                  |                     |                     |                     |                     |                        |
| 33 |                                  |                     |                     |                     |                     |                        |
| 34 | Lebanon                          | 0.62 (0.52-0.75)    | 32.44 (27.01-39.57) | 1.18 (0.85-1.53)    | 23.32 (16.78-30.26) | -1.11 (-1.25 to -0.97) |
| 35 |                                  |                     |                     |                     |                     |                        |
| 36 | Lesotho                          | 0.22 (0.18-0.28)    | 24.49 (20.02-29.91) | 0.56 (0.4-0.73)     | 49.32 (35.95-62.73) | 3.04 (2.73 to 3.35)    |
| 37 |                                  |                     |                     |                     |                     |                        |
| 38 |                                  |                     |                     |                     |                     |                        |
| 39 |                                  |                     |                     |                     |                     |                        |
| 40 |                                  |                     |                     |                     |                     |                        |
| 41 |                                  |                     |                     |                     |                     |                        |
| 42 |                                  |                     |                     |                     |                     |                        |
| 43 |                                  |                     |                     |                     |                     |                        |
| 44 |                                  |                     |                     |                     |                     |                        |
| 45 |                                  |                     |                     |                     |                     |                        |
| 46 |                                  |                     |                     |                     |                     |                        |

|    |                  |                  |                     |                  |                     |                        |
|----|------------------|------------------|---------------------|------------------|---------------------|------------------------|
| 1  |                  |                  |                     |                  |                     |                        |
| 2  |                  |                  |                     |                  |                     |                        |
| 3  |                  |                  |                     |                  |                     |                        |
| 4  |                  |                  |                     |                  |                     |                        |
| 5  | Liberia          | 0.45 (0.37-0.55) | 41.82 (35.14-51.43) | 0.65 (0.47-0.9)  | 33.14 (25.24-45.08) | -0.58 (-0.85 to -0.32) |
| 6  |                  |                  |                     |                  |                     |                        |
| 7  |                  |                  |                     |                  |                     |                        |
| 8  | Libya            | 0.52 (0.4-0.66)  | 29.75 (22.44-39.08) | 1.37 (0.92-1.86) | 30.37 (20.49-41.27) | 0.33 (0.15 to 0.5)     |
| 9  |                  |                  |                     |                  |                     |                        |
| 10 | Lithuania        | 0.12 (0.11-0.12) | 2.66 (2.46-2.84)    | 0.26 (0.22-0.31) | 4.37 (3.64-5.24)    | 1.2 (0.62 to 1.78)     |
| 11 |                  |                  |                     |                  |                     |                        |
| 12 |                  |                  |                     |                  |                     |                        |
| 13 | Luxembourg       | 0.05 (0.05-0.06) | 10.12 (9.11-10.94)  | 0.12 (0.1-0.14)  | 10.19 (8.48-11.88)  | 0.23 (0.02 to 0.44)    |
| 14 |                  |                  |                     |                  |                     |                        |
| 15 | Madagascar       | 1.2 (0.94-1.49)  | 22.91 (17.82-29.06) | 1.94 (1.49-2.54) | 20.34 (15.74-26.54) | -0.49 (-0.56 to -0.42) |
| 16 |                  |                  |                     |                  |                     |                        |
| 17 |                  |                  |                     |                  |                     |                        |
| 18 | Malawi           | 1.04 (0.83-1.21) | 27.48 (23.76-31.57) | 1.78 (1.46-2.15) | 26.24 (21.93-31.13) | -0.28 (-0.42 to -0.14) |
| 19 |                  |                  |                     |                  |                     |                        |
| 20 |                  |                  |                     |                  |                     |                        |
| 21 | Malaysia         | 2.18 (2.01-2.37) | 24.78 (22.57-27.13) | 6.11 (4.87-7.45) | 25.56 (20.44-31)    | -0.47 (-0.73 to -0.22) |
| 22 |                  |                  |                     |                  |                     |                        |
| 23 | Maldives         | 0.04 (0.04-0.05) | 57.41 (49.94-68.83) | 0.09 (0.07-0.1)  | 33.8 (27.82-39.77)  | -2.22 (-2.46 to -1.97) |
| 24 |                  |                  |                     |                  |                     |                        |
| 25 |                  |                  |                     |                  |                     |                        |
| 26 | Mali             | 1.52 (1.21-1.91) | 37.05 (29.91-46.42) | 2.7 (2.07-3.46)  | 31.19 (25-38.82)    | -0.45 (-0.61 to -0.29) |
| 27 |                  |                  |                     |                  |                     |                        |
| 28 | Malta            | 0.05 (0.05-0.06) | 13.49 (12.13-14.67) | 0.11 (0.09-0.12) | 10.34 (8.85-11.81)  | -0.93 (-1.14 to -0.72) |
| 29 |                  |                  |                     |                  |                     |                        |
| 30 |                  |                  |                     |                  |                     |                        |
| 31 | Marshall Islands | 0.01 (0.01-0.01) | 39.58 (31.44-51.85) | 0.02 (0.01-0.02) | 53.39 (39.7-72.05)  | 1.04 (0.78 to 1.3)     |
| 32 |                  |                  |                     |                  |                     |                        |
| 33 |                  |                  |                     |                  |                     |                        |
| 34 | Mauritania       | 0.45 (0.38-0.53) | 47.02 (39-55.12)    | 0.59 (0.44-0.76) | 30.91 (23.68-38.57) | -1.45 (-1.52 to -1.37) |
| 35 |                  |                  |                     |                  |                     |                        |
| 36 | Mauritius        | 0.31 (0.29-0.33) | 44.68 (41.91-47.57) | 1.26 (1.03-1.53) | 75.03 (61.8-90.76)  | 2.09 (1.74 to 2.45)    |
| 37 |                  |                  |                     |                  |                     |                        |
| 38 |                  |                  |                     |                  |                     |                        |
| 39 |                  |                  |                     |                  |                     |                        |
| 40 |                  |                  |                     |                  |                     |                        |
| 41 |                  |                  |                     |                  |                     |                        |
| 42 |                  |                  |                     |                  |                     |                        |
| 43 |                  |                  |                     |                  |                     |                        |
| 44 |                  |                  |                     |                  |                     |                        |
| 45 |                  |                  |                     |                  |                     |                        |
| 46 |                  |                  |                     |                  |                     |                        |

1  
2  
3  
4  
5  
6  
7  
8  
9  
10  
11  
12  
13  
14  
15  
16  
17  
18  
19  
20  
21  
22  
23  
24  
25  
26  
27  
28  
29  
30  
31  
32  
33  
34  
35  
36  
37  
38  
39  
40  
41  
42  
43  
44  
45  
46

|                                  |                     |                     |                    |                     |                        |
|----------------------------------|---------------------|---------------------|--------------------|---------------------|------------------------|
| Mexico                           | 12.18 (11.63-12.52) | 30.65 (28.76-31.74) | 72.54 (62.59-82.5) | 63.67 (55.02-72.25) | 2.85 (2.43 to 3.27)    |
| Micronesia (Federated States of) | 0.02 (0.02-0.03)    | 49.5 (39.15-64.24)  | 0.05 (0.03-0.06)   | 77.21 (57.56-97.54) | 1.45 (1.05 to 1.84)    |
| Monaco                           | 0 (0-0)             | 4.16 (3.41-4.99)    | 0.01 (0.01-0.01)   | 6.28 (5.16-7.39)    | 1.83 (1.41 to 2.26)    |
| Mongolia                         | 0.39 (0.33-0.46)    | 35.49 (30.53-41)    | 0.39 (0.31-0.5)    | 17.81 (14.41-22.12) | -3.6 (-4.07 to -3.12)  |
| Montenegro                       | 0.07 (0.07-0.08)    | 12.43 (11.17-13.87) | 0.13 (0.11-0.15)   | 13.82 (11.6-16.13)  | 0.55 (0.38 to 0.72)    |
| Morocco                          | 3.55 (3.03-4.63)    | 29.43 (24.56-41.35) | 9.32 (7.16-11.84)  | 35.84 (27.87-46.25) | 0.76 (0.62 to 0.89)    |
| Mozambique                       | 1.24 (1.02-1.52)    | 22.84 (18.92-28.33) | 2.64 (2.08-3.28)   | 25.87 (21.06-32.1)  | 0.5 (0.37 to 0.63)     |
| Myanmar                          | 7.64 (5.94-9.5)     | 30.76 (24.01-38.16) | 11.55 (9.73-13.96) | 26.84 (23.21-32.3)  | -0.53 (-0.65 to -0.41) |
| Namibia                          | 0.18 (0.13-0.24)    | 27.85 (20.88-37.4)  | 0.35 (0.25-0.49)   | 27.4 (20-38.41)     | -0.39 (-0.75 to -0.02) |
| Nauru                            | 0 (0-0)             | 49.17 (38.1-60.09)  | 0 (0-0)            | 66.61 (49.13-82.46) | 0.93 (0.61 to 1.25)    |
| Nepal                            | 1.73 (1.27-2.25)    | 18.15 (13.34-24.47) | 5.11 (3.58-6.71)   | 25.06 (17.71-32.79) | 1.23 (0.94 to 1.53)    |
| Netherlands                      | 1.68 (1.48-1.82)    | 8.42 (7.37-9.15)    | 3.78 (3.23-4.22)   | 9.8 (8.42-10.92)    | 0.67 (0.59 to 0.75)    |
| New Zealand                      | 0.31 (0.28-0.33)    | 8.26 (7.56-8.83)    | 0.91 (0.79-1)      | 10.82 (9.52-11.82)  | 1.04 (0.82 to 1.27)    |

|    |                          |                     |                     |                     |                     |                       |
|----|--------------------------|---------------------|---------------------|---------------------|---------------------|-----------------------|
| 1  |                          |                     |                     |                     |                     |                       |
| 2  |                          |                     |                     |                     |                     |                       |
| 3  |                          |                     |                     |                     |                     |                       |
| 4  |                          |                     |                     |                     |                     |                       |
| 5  | Nicaragua                | 0.61 (0.57-0.65)    | 37.62 (34.76-40.75) | 3.48 (2.87-4.09)    | 83.24 (69.57-96.75) | 3.14 (2.79 to 3.49)   |
| 6  |                          |                     |                     |                     |                     |                       |
| 7  |                          |                     |                     |                     |                     |                       |
| 8  | Niger                    | 1.07 (0.84-1.35)    | 35.2 (27.55-44.12)  | 2.2 (1.61-2.91)     | 28.69 (22.39-36.04) | -0.66 (-0.73 to -0.6) |
| 9  |                          |                     |                     |                     |                     |                       |
| 10 | Nigeria                  | 11.66 (9.42-14.85)  | 27.69 (22.51-35.07) | 20.04 (15.89-25.09) | 24.84 (20.27-30.37) | -0.3 (-0.36 to -0.23) |
| 11 |                          |                     |                     |                     |                     |                       |
| 12 |                          |                     |                     |                     |                     |                       |
| 13 | Niue                     | 0 (0-0)             | 35.72 (28.03-44.02) | 0 (0-0)             | 47.39 (34.47-59.33) | 0.85 (0.59 to 1.12)   |
| 14 |                          |                     |                     |                     |                     |                       |
| 15 | North Macedonia          | 0.19 (0.18-0.22)    | 11.25 (10.27-12.72) | 0.36 (0.29-0.45)    | 12.72 (10.34-15.66) | 0.3 (0.07 to 0.54)    |
| 16 |                          |                     |                     |                     |                     |                       |
| 17 |                          |                     |                     |                     |                     |                       |
| 18 | Northern Mariana Islands | 0.01 (0.01-0.01)    | 45.65 (39.08-54.81) | 0.02 (0.02-0.03)    | 56.84 (48.66-65.02) | 0.95 (0.85 to 1.06)   |
| 19 |                          |                     |                     |                     |                     |                       |
| 20 |                          |                     |                     |                     |                     |                       |
| 21 | Norway                   | 0.34 (0.31-0.36)    | 4.55 (4.2-4.77)     | 0.78 (0.67-0.84)    | 6.69 (5.84-7.25)    | 1.49 (1.18 to 1.8)    |
| 22 |                          |                     |                     |                     |                     |                       |
| 23 |                          |                     |                     |                     |                     |                       |
| 24 | Oman                     | 0.08 (0.06-0.11)    | 16.82 (12.93-22.29) | 0.2 (0.17-0.23)     | 19.85 (17.05-22.82) | 0.98 (0.78 to 1.17)   |
| 25 |                          |                     |                     |                     |                     |                       |
| 26 | Pakistan                 | 15.21 (11.34-20.54) | 26.34 (19.51-35.91) | 44.39 (32.45-56.53) | 39.88 (29.74-50.88) | 1.43 (1.17 to 1.7)    |
| 27 |                          |                     |                     |                     |                     |                       |
| 28 |                          |                     |                     |                     |                     |                       |
| 29 | Palau                    | 0.01 (0-0.01)       | 54.63 (45.05-68.31) | 0.01 (0.01-0.02)    | 69.74 (56.33-84.64) | 0.79 (0.59 to 1)      |
| 30 |                          |                     |                     |                     |                     |                       |
| 31 | Palestine                | 0.39 (0.31-0.48)    | 46.81 (37.83-57.37) | 0.65 (0.55-0.75)    | 33.58 (28.52-38.58) | -0.86 (-1.11 to -0.6) |
| 32 |                          |                     |                     |                     |                     |                       |
| 33 |                          |                     |                     |                     |                     |                       |
| 34 | Panama                   | 0.22 (0.2-0.24)     | 14.61 (13.34-15.73) | 1.15 (0.9-1.46)     | 27.39 (21.28-34.63) | 2.25 (1.89 to 2.61)   |
| 35 |                          |                     |                     |                     |                     |                       |
| 36 | Papua New Guinea         | 0.25 (0.2-0.31)     | 12.19 (9.8-14.71)   | 0.74 (0.56-0.95)    | 14.36 (11.09-17.95) | 0.51 (0.36 to 0.65)   |
| 37 |                          |                     |                     |                     |                     |                       |
| 38 |                          |                     |                     |                     |                     |                       |
| 39 |                          |                     |                     |                     |                     |                       |
| 40 |                          |                     |                     |                     |                     |                       |
| 41 |                          |                     |                     |                     |                     |                       |
| 42 |                          |                     |                     |                     |                     |                       |
| 43 |                          |                     |                     |                     |                     |                       |
| 44 |                          |                     |                     |                     |                     |                       |
| 45 |                          |                     |                     |                     |                     |                       |
| 46 |                          |                     |                     |                     |                     |                       |



|    |                       |                    |                     |                     |                     |                        |
|----|-----------------------|--------------------|---------------------|---------------------|---------------------|------------------------|
| 1  |                       |                    |                     |                     |                     |                        |
| 2  |                       |                    |                     |                     |                     |                        |
| 3  |                       |                    |                     |                     |                     |                        |
| 4  |                       |                    |                     |                     |                     |                        |
| 5  | Paraguay              | 0.34 (0.3-0.37)    | 15.41 (13.63-17.13) | 1.88 (1.46-2.4)     | 34.76 (27.05-44.15) | 3.48 (3.24 to 3.71)    |
| 6  |                       |                    |                     |                     |                     |                        |
| 7  |                       |                    |                     |                     |                     |                        |
| 8  | Peru                  | 2.92 (2.59-3.3)    | 24.09 (21.15-27.33) | 8.04 (5.92-10.44)   | 24.72 (18.22-32.03) | 0.19 (-0.04 to 0.42)   |
| 9  |                       |                    |                     |                     |                     |                        |
| 10 | Philippines           | 10.41 (9.42-11.48) | 38.22 (34.49-42.3)  | 33.36 (27.88-39.55) | 44.7 (37.65-52.35)  | 0.92 (0.66 to 1.18)    |
| 11 |                       |                    |                     |                     |                     |                        |
| 12 |                       |                    |                     |                     |                     |                        |
| 13 | Poland                | 4.41 (4.25-4.53)   | 10.66 (10.2-10.95)  | 4.7 (3.97-5.59)     | 6.5 (5.49-7.73)     | -1.96 (-2.39 to -1.53) |
| 14 |                       |                    |                     |                     |                     |                        |
| 15 | Portugal              | 1.58 (1.49-1.67)   | 12.57 (11.77-13.3)  | 4.07 (3.45-4.51)    | 13.48 (11.55-14.86) | 0.38 (-0.07 to 0.84)   |
| 16 |                       |                    |                     |                     |                     |                        |
| 17 |                       |                    |                     |                     |                     |                        |
| 18 | Puerto Rico           | 0.99 (0.93-1.05)   | 28.44 (26.47-30.11) | 2.06 (1.6-2.59)     | 26.89 (21.12-34.09) | 0.4 (0.08 to 0.72)     |
| 19 |                       |                    |                     |                     |                     |                        |
| 20 |                       |                    |                     |                     |                     |                        |
| 21 | Qatar                 | 0.03 (0.02-0.04)   | 48.93 (38.41-84.35) | 0.13 (0.1-0.17)     | 45.88 (37.09-55.98) | 0.07 (-0.19 to 0.33)   |
| 22 |                       |                    |                     |                     |                     |                        |
| 23 | Republic of Korea     | 3.12 (2.97-3.33)   | 12.08 (11.28-12.97) | 7.98 (6.93-8.86)    | 9.56 (8.27-10.64)   | -0.56 (-0.65 to -0.47) |
| 24 |                       |                    |                     |                     |                     |                        |
| 25 |                       |                    |                     |                     |                     |                        |
| 26 | Republic of Moldova   | 0.1 (0.09-0.11)    | 2.87 (2.67-3.05)    | 0.25 (0.21-0.28)    | 4.46 (3.88-5.03)    | 1.53 (1.2 to 1.85)     |
| 27 |                       |                    |                     |                     |                     |                        |
| 28 |                       |                    |                     |                     |                     |                        |
| 29 | Romania               | 2.59 (2.47-2.69)   | 10.43 (9.94-10.84)  | 3.04 (2.55-3.61)    | 7.98 (6.68-9.46)    | -0.52 (-1.04 to 0)     |
| 30 |                       |                    |                     |                     |                     |                        |
| 31 | Russian Federation    | 9.02 (8.79-9.32)   | 5.47 (5.29-5.63)    | 11.65 (10.16-13.13) | 5.17 (4.52-5.82)    | -0.89 (-1.21 to -0.57) |
| 32 |                       |                    |                     |                     |                     |                        |
| 33 |                       |                    |                     |                     |                     |                        |
| 34 | Rwanda                | 0.93 (0.76-1.1)    | 32.51 (27.17-38.51) | 1.27 (0.99-1.56)    | 24.68 (19.41-29.96) | -1.65 (-1.93 to -1.37) |
| 35 |                       |                    |                     |                     |                     |                        |
| 36 | Saint Kitts and Nevis | 0.02 (0.02-0.02)   | 48.81 (44.79-53.28) | 0.03 (0.03-0.04)    | 53.07 (44.4-61.71)  | 0.73 (0.55 to 0.91)    |
| 37 |                       |                    |                     |                     |                     |                        |
| 38 |                       |                    |                     |                     |                     |                        |
| 39 |                       |                    |                     |                     |                     |                        |
| 40 |                       |                    |                     |                     |                     |                        |
| 41 |                       |                    |                     |                     |                     |                        |
| 42 |                       |                    |                     |                     |                     |                        |
| 43 |                       |                    |                     |                     |                     |                        |
| 44 |                       |                    |                     |                     |                     |                        |
| 45 |                       |                    |                     |                     |                     |                        |
| 46 |                       |                    |                     |                     |                     |                        |

|    |                                  |                  |                     |                  |                     |                        |
|----|----------------------------------|------------------|---------------------|------------------|---------------------|------------------------|
| 1  |                                  |                  |                     |                  |                     |                        |
| 2  |                                  |                  |                     |                  |                     |                        |
| 3  |                                  |                  |                     |                  |                     |                        |
| 4  |                                  |                  |                     |                  |                     |                        |
| 5  | Saint Lucia                      | 0.03 (0.02-0.03) | 31.56 (29.14-33.94) | 0.07 (0.06-0.08) | 34.59 (28.97-40.83) | 0.39 (0.16 to 0.62)    |
| 6  |                                  |                  |                     |                  |                     |                        |
| 7  |                                  |                  |                     |                  |                     |                        |
| 8  | Saint Vincent and the Grenadines | 0.02 (0.02-0.02) | 25.51 (23.01-27.92) | 0.05 (0.04-0.05) | 36.54 (31.68-42.06) | 1.55 (1.32 to 1.78)    |
| 9  |                                  |                  |                     |                  |                     |                        |
| 10 | Samoa                            | 0.03 (0.02-0.04) | 37.95 (30.01-47.78) | 0.06 (0.05-0.08) | 44.6 (36.37-54.81)  | 0.47 (0.26 to 0.68)    |
| 11 |                                  |                  |                     |                  |                     |                        |
| 12 |                                  |                  |                     |                  |                     |                        |
| 13 | San Marino                       | 0 (0-0)          | 4.05 (3.41-4.74)    | 0 (0-0.01)       | 5.09 (3.52-6.82)    | 1.51 (1.24 to 1.77)    |
| 14 |                                  |                  |                     |                  |                     |                        |
| 15 | Sao Tome and Principe            | 0.03 (0.02-0.03) | 43.51 (36.27-49.57) | 0.05 (0.04-0.06) | 51.3 (40.4-59.87)   | 0.48 (0.36 to 0.6)     |
| 16 |                                  |                  |                     |                  |                     |                        |
| 17 |                                  |                  |                     |                  |                     |                        |
| 18 | Saudi Arabia                     | 2.48 (1.93-3.1)  | 47.9 (37.69-59.35)  | 6.93 (5.45-8.55) | 52.88 (42.82-63.11) | 0.58 (0.35 to 0.81)    |
| 19 |                                  |                  |                     |                  |                     |                        |
| 20 |                                  |                  |                     |                  |                     |                        |
| 21 | Senegal                          | 1.33 (1.04-1.71) | 41.68 (33.28-53.19) | 2.45 (1.89-3.22) | 34.93 (27.7-45.06)  | -0.54 (-0.67 to -0.42) |
| 22 |                                  |                  |                     |                  |                     |                        |
| 23 | Serbia                           | 1.42 (1.28-1.67) | 14 (12.58-16.3)     | 2.52 (2.05-3)    | 16.34 (13.34-19.38) | 0.83 (0.66 to 1)       |
| 24 |                                  |                  |                     |                  |                     |                        |
| 25 |                                  |                  |                     |                  |                     |                        |
| 26 | Seychelles                       | 0.02 (0.01-0.02) | 29.87 (26.45-33.1)  | 0.04 (0.04-0.05) | 44.43 (38.76-49.83) | 0.9 (0.52 to 1.29)     |
| 27 |                                  |                  |                     |                  |                     |                        |
| 28 | Sierra Leone                     | 0.64 (0.51-0.79) | 32.65 (26.08-39.62) | 1.04 (0.79-1.33) | 28.55 (22.85-35.84) | -0.28 (-0.36 to -0.2)  |
| 29 |                                  |                  |                     |                  |                     |                        |
| 30 |                                  |                  |                     |                  |                     |                        |
| 31 | Singapore                        | 0.31 (0.29-0.33) | 15.54 (14.57-16.4)  | 0.76 (0.66-0.83) | 10.51 (9.09-11.55)  | -0.38 (-0.94 to 0.18)  |
| 32 |                                  |                  |                     |                  |                     |                        |
| 33 |                                  |                  |                     |                  |                     |                        |
| 34 | Slovakia                         | 0.69 (0.64-0.74) | 11.86 (11.06-12.74) | 0.76 (0.6-0.93)  | 8.42 (6.73-10.33)   | -1.05 (-1.13 to -0.96) |
| 35 |                                  |                  |                     |                  |                     |                        |
| 36 | Slovenia                         | 0.15 (0.12-0.19) | 6.5 (5.14-8.02)     | 0.26 (0.2-0.33)  | 4.99 (3.91-6.36)    | -0.16 (-0.44 to 0.13)  |
| 37 |                                  |                  |                     |                  |                     |                        |
| 38 |                                  |                  |                     |                  |                     |                        |
| 39 |                                  |                  |                     |                  |                     |                        |
| 40 |                                  |                  |                     |                  |                     |                        |
| 41 |                                  |                  |                     |                  |                     |                        |
| 42 |                                  |                  |                     |                  |                     |                        |
| 43 |                                  |                  |                     |                  |                     |                        |
| 44 |                                  |                  |                     |                  |                     |                        |
| 45 |                                  |                  |                     |                  |                     |                        |
| 46 |                                  |                  |                     |                  |                     |                        |

|    |                            |                  |                     |                     |                     |                        |
|----|----------------------------|------------------|---------------------|---------------------|---------------------|------------------------|
| 1  |                            |                  |                     |                     |                     |                        |
| 2  |                            |                  |                     |                     |                     |                        |
| 3  |                            |                  |                     |                     |                     |                        |
| 4  |                            |                  |                     |                     |                     |                        |
| 5  | Solomon Islands            | 0.07 (0.05-0.09) | 41.92 (31.97-57.06) | 0.09 (0.07-0.11)    | 25.15 (20.72-29.99) | -1.94 (-2.35 to -1.53) |
| 6  |                            |                  |                     |                     |                     |                        |
| 7  |                            |                  |                     |                     |                     |                        |
| 8  | Somalia                    | 0.76 (0.57-0.96) | 31.28 (23.57-39.61) | 1.88 (1.43-2.5)     | 29.63 (22.61-39.38) | -0.06 (-0.11 to -0.01) |
| 9  |                            |                  |                     |                     |                     |                        |
| 10 | South Africa               | 4.61 (4.25-5.07) | 22 (20.07-24.29)    | 12.35 (11.41-13.22) | 31.02 (28.44-33.22) | 1.29 (0.9 to 1.68)     |
| 11 |                            |                  |                     |                     |                     |                        |
| 12 |                            |                  |                     |                     |                     |                        |
| 13 | South Sudan                | 0.65 (0.48-0.83) | 27.62 (20.27-35.67) | 0.93 (0.69-1.25)    | 27.22 (20.38-35.97) | -0.06 (-0.09 to -0.02) |
| 14 |                            |                  |                     |                     |                     |                        |
| 15 |                            |                  |                     |                     |                     |                        |
| 16 | Spain                      | 7.68 (6.91-8.29) | 14.79 (13.28-15.99) | 14.65 (12.08-16.74) | 11.06 (9.33-12.49)  | -0.87 (-0.94 to -0.8)  |
| 17 |                            |                  |                     |                     |                     |                        |
| 18 | Sri Lanka                  | 2.49 (2.21-2.74) | 25.27 (22.31-27.99) | 5.56 (4.15-7.26)    | 24.09 (18.08-31.21) | -0.11 (-0.51 to 0.28)  |
| 19 |                            |                  |                     |                     |                     |                        |
| 20 |                            |                  |                     |                     |                     |                        |
| 21 | Sudan                      | 2.61 (2.06-3.46) | 28.53 (22.13-40.32) | 4.75 (3.37-7.17)    | 28.39 (20.33-44.3)  | 0.05 (-0.04 to 0.14)   |
| 22 |                            |                  |                     |                     |                     |                        |
| 23 | Suriname                   | 0.07 (0.07-0.08) | 28.55 (25.56-30.97) | 0.26 (0.22-0.31)    | 45.34 (37.97-53.46) | 1.67 (1.38 to 1.96)    |
| 24 |                            |                  |                     |                     |                     |                        |
| 25 |                            |                  |                     |                     |                     |                        |
| 26 | Sweden                     | 0.65 (0.59-0.69) | 3.93 (3.59-4.17)    | 2 (1.68-2.21)       | 7.5 (6.43-8.23)     | 2.55 (2.42 to 2.67)    |
| 27 |                            |                  |                     |                     |                     |                        |
| 28 |                            |                  |                     |                     |                     |                        |
| 29 | Switzerland                | 0.61 (0.54-0.66) | 5.43 (4.84-5.87)    | 2.22 (1.82-2.52)    | 9.49 (7.91-10.75)   | 2.76 (2.5 to 3.03)     |
| 30 |                            |                  |                     |                     |                     |                        |
| 31 | Syrian Arab Republic       | 1.95 (1.61-2.37) | 36.99 (30.44-46.13) | 2.66 (2.07-3.42)    | 27.78 (22.07-34.58) | -1.65 (-1.95 to -1.34) |
| 32 |                            |                  |                     |                     |                     |                        |
| 33 |                            |                  |                     |                     |                     |                        |
| 34 | Taiwan (Province of China) | 3.33 (3.14-3.53) | 26.1 (24.33-27.84)  | 8.25 (6.51-10.33)   | 20.47 (16.14-25.73) | -0.94 (-1.1 to -0.79)  |
| 35 |                            |                  |                     |                     |                     |                        |
| 36 | Tajikistan                 | 0.1 (0.1-0.11)   | 3.18 (2.94-3.47)    | 0.4 (0.33-0.49)     | 9.4 (7.8-11.25)     | 4.07 (3.7 to 4.45)     |
| 37 |                            |                  |                     |                     |                     |                        |
| 38 |                            |                  |                     |                     |                     |                        |
| 39 |                            |                  |                     |                     |                     |                        |
| 40 |                            |                  |                     |                     |                     |                        |
| 41 |                            |                  |                     |                     |                     |                        |
| 42 |                            |                  |                     |                     |                     |                        |
| 43 |                            |                  |                     |                     |                     |                        |
| 44 |                            |                  |                     |                     |                     |                        |
| 45 |                            |                  |                     |                     |                     |                        |
| 46 |                            |                  |                     |                     |                     |                        |

|    |                      |                    |                     |                     |                     |                        |
|----|----------------------|--------------------|---------------------|---------------------|---------------------|------------------------|
| 1  |                      |                    |                     |                     |                     |                        |
| 2  |                      |                    |                     |                     |                     |                        |
| 3  |                      |                    |                     |                     |                     |                        |
| 4  |                      |                    |                     |                     |                     |                        |
| 5  | Thailand             | 9.77 (8.63-11.15)  | 29.2 (25.83-33.3)   | 27.45 (21.01-35.47) | 27.94 (21.36-35.99) | -0.38 (-0.48 to -0.28) |
| 6  |                      |                    |                     |                     |                     |                        |
| 7  |                      |                    |                     |                     |                     |                        |
| 8  | Timor-Leste          | 0.09 (0.07-0.12)   | 31.54 (24.73-42.46) | 0.23 (0.17-0.3)     | 31.3 (24.09-39.75)  | -0.04 (-0.24 to 0.15)  |
| 9  |                      |                    |                     |                     |                     |                        |
| 10 | Togo                 | 0.43 (0.35-0.54)   | 34.23 (28.17-42.73) | 1 (0.79-1.27)       | 30.2 (24.51-37.23)  | -0.43 (-0.47 to -0.39) |
| 11 |                      |                    |                     |                     |                     |                        |
| 12 |                      |                    |                     |                     |                     |                        |
| 13 | Tokelau              | 0 (0-0)            | 32.9 (25.7-42.75)   | 0 (0-0)             | 40.42 (31.37-54.02) | 0.67 (0.44 to 0.9)     |
| 14 |                      |                    |                     |                     |                     |                        |
| 15 | Tonga                | 0.01 (0.01-0.02)   | 28.56 (23.31-37.54) | 0.03 (0.03-0.04)    | 41.51 (33.11-54.56) | 1.25 (0.87 to 1.63)    |
| 16 |                      |                    |                     |                     |                     |                        |
| 17 |                      |                    |                     |                     |                     |                        |
| 18 | Trinidad and Tobago  | 0.18 (0.16-0.19)   | 21.8 (20.39-23.17)  | 0.62 (0.46-0.8)     | 34.37 (25.88-44.38) | 2 (1.76 to 2.25)       |
| 19 |                      |                    |                     |                     |                     |                        |
| 20 |                      |                    |                     |                     |                     |                        |
| 21 | Tunisia              | 1.03 (0.88-1.23)   | 24.28 (20.58-29.37) | 2.63 (1.88-3.49)    | 23.62 (16.87-31.07) | -0.12 (-0.16 to -0.09) |
| 22 |                      |                    |                     |                     |                     |                        |
| 23 | Turkey               | 11.61 (9.54-15.85) | 35.19 (28.26-50.25) | 19.19 (15.49-23.48) | 23.48 (18.99-28.71) | -1.28 (-1.59 to -0.97) |
| 24 |                      |                    |                     |                     |                     |                        |
| 25 |                      |                    |                     |                     |                     |                        |
| 26 | Turkmenistan         | 0.31 (0.29-0.33)   | 13.45 (12.55-14.37) | 0.71 (0.58-0.9)     | 17.38 (14.16-21.64) | 0.34 (0.03 to 0.65)    |
| 27 |                      |                    |                     |                     |                     |                        |
| 28 | Tuvalu               | 0 (0-0)            | 38.58 (30.62-49.14) | 0 (0-0.01)          | 48.67 (35.96-66.59) | 0.78 (0.56 to 0.99)    |
| 29 |                      |                    |                     |                     |                     |                        |
| 30 |                      |                    |                     |                     |                     |                        |
| 31 | Uganda               | 1.55 (1.2-1.94)    | 25.22 (19.55-31.82) | 3.39 (2.62-4.26)    | 25.81 (20.58-31.71) | -0.19 (-0.32 to -0.05) |
| 32 |                      |                    |                     |                     |                     |                        |
| 33 |                      |                    |                     |                     |                     |                        |
| 34 | Ukraine              | 1.41 (1.34-1.47)   | 2.29 (2.15-2.39)    | 2.66 (2.28-3.07)    | 3.86 (3.31-4.47)    | 2.18 (1.89 to 2.47)    |
| 35 |                      |                    |                     |                     |                     |                        |
| 36 | United Arab Emirates | 0.21 (0.16-0.26)   | 61.23 (37.47-75.7)  | 1.43 (0.91-2.26)    | 48.09 (29.07-73.62) | -0.82 (-1.4 to -0.24)  |
| 37 |                      |                    |                     |                     |                     |                        |
| 38 |                      |                    |                     |                     |                     |                        |
| 39 |                      |                    |                     |                     |                     |                        |
| 40 |                      |                    |                     |                     |                     |                        |
| 41 |                      |                    |                     |                     |                     |                        |
| 42 |                      |                    |                     |                     |                     |                        |
| 43 |                      |                    |                     |                     |                     |                        |
| 44 |                      |                    |                     |                     |                     |                        |
| 45 |                      |                    |                     |                     |                     |                        |
| 46 |                      |                    |                     |                     |                     |                        |

1  
2  
3  
4  
5  
6  
7  
8  
9  
10  
11  
12  
13  
14  
15  
16  
17  
18  
19  
20  
21  
22  
23  
24  
25  
26  
27  
28  
29  
30  
31  
32  
33  
34  
35  
36  
37  
38  
39  
40  
41  
42  
43  
44  
45  
46

|                                    |                    |                     |                       |                     |                        |
|------------------------------------|--------------------|---------------------|-----------------------|---------------------|------------------------|
| United Kingdom                     | 4.97 (4.64-5.15)   | 5.41 (5.03-5.63)    | 7.78 (6.85-8.33)      | 5.29 (4.7-5.64)     | 0.38 (0.12 to 0.64)    |
| United Republic of Tanzania        | 2.75 (2.31-3.27)   | 26.7 (22.58-32.2)   | 6.23 (5.26-7.36)      | 27.3 (23.17-31.68)  | 0.13 (0.05 to 0.2)     |
| United States of America           | 33.1 (30.49-34.45) | 9.94 (9.18-10.34)   | 106.95 (95.86-114.38) | 17.77 (16.12-18.91) | 2.43 (2.22 to 2.63)    |
| United States Virgin Islands       | 0.02 (0.01-0.02)   | 21.34 (18.16-24.86) | 0.05 (0.04-0.06)      | 30.18 (25.88-34.3)  | 1.76 (1.53 to 1.99)    |
| Uruguay                            | 0.51 (0.47-0.54)   | 13.21 (12.24-14.02) | 0.99 (0.87-1.09)      | 15.9 (14.15-17.4)   | 0.94 (0.8 to 1.09)     |
| Uzbekistan                         | 1.89 (1.64-2.52)   | 14.76 (12.61-20.49) | 3.97 (3.33-4.67)      | 19.85 (17.05-22.89) | 0.69 (-0.1 to 1.5)     |
| Vanuatu                            | 0.02 (0.01-0.02)   | 26.09 (18.67-35.84) | 0.07 (0.05-0.09)      | 43.38 (32.55-57.97) | 1.91 (1.78 to 2.04)    |
| Venezuela (Bolivarian Republic of) | 1.55 (1.46-1.64)   | 16.19 (15.07-17.25) | 10.41 (7.89-13.43)    | 36.77 (27.88-47.38) | 2.43 (1.94 to 2.92)    |
| Viet Nam                           | 11.03 (8.95-13.56) | 29.05 (23.77-35.4)  | 21.48 (16.68-25.81)   | 26.62 (20.89-31.76) | -0.38 (-0.85 to 0.09)  |
| Yemen                              | 1.15 (0.86-1.54)   | 24.8 (18.61-34.23)  | 2.68 (2.05-3.54)      | 23.19 (18.02-30.53) | -0.26 (-0.33 to -0.18) |
| Zambia                             | 0.95 (0.81-1.11)   | 32.83 (27.31-38.79) | 1.93 (1.55-2.4)       | 30.81 (25.1-37.46)  | -0.48 (-0.66 to -0.3)  |
| Zimbabwe                           | 0.92 (0.7-1.36)    | 25.95 (20.13-37.57) | 2.29 (1.66-3.38)      | 37.07 (27.36-55.38) | 1.55 (1.21 to 1.89)    |

**Supplemental table 5. Death cases ratio between females to males and age-standardized death rate (ASDR) ratio between females to males in 21 geographic regions from 1990 to 2019 in 21 regions.**

| location             | year | Ratio of female to male death cases | Ratio of female ASDR to male ASDR |
|----------------------|------|-------------------------------------|-----------------------------------|
| Andean Latin America | 1990 | 0.942869                            | 0.890741                          |
| Andean Latin America | 1991 | 0.989165                            | 0.932389                          |
| Andean Latin America | 1992 | 1.02563                             | 0.967065                          |
| Andean Latin America | 1993 | 1.016962                            | 0.958297                          |
| Andean Latin America | 1994 | 1.061313                            | 1.001181                          |
| Andean Latin America | 1995 | 1.077537                            | 1.019983                          |
| Andean Latin America | 1996 | 1.032404                            | 0.980159                          |
| Andean Latin America | 1997 | 1.030348                            | 0.978622                          |
| Andean Latin America | 1998 | 1.022574                            | 0.969425                          |
| Andean Latin America | 1999 | 0.992515                            | 0.940177                          |

1  
2  
3  
4  
5  
6  
7  
8  
9  
10  
11  
12  
13  
14  
15  
16  
17  
18  
19  
20  
21  
22  
23  
24  
25  
26  
27  
28  
29  
30  
31  
32  
33  
34  
35  
36  
37  
38  
39  
40  
41  
42  
43  
44  
45  
46

|                      |      |          |          |
|----------------------|------|----------|----------|
| Andean Latin America | 2000 | 0.997206 | 0.943015 |
| Andean Latin America | 2001 | 0.947616 | 0.894712 |
| Andean Latin America | 2002 | 0.990555 | 0.931385 |
| Andean Latin America | 2003 | 1.019051 | 0.956351 |
| Andean Latin America | 2004 | 0.985019 | 0.922183 |
| Andean Latin America | 2005 | 0.978694 | 0.912562 |
| Andean Latin America | 2006 | 0.961884 | 0.892727 |
| Andean Latin America | 2007 | 0.945709 | 0.874394 |
| Andean Latin America | 2008 | 0.952065 | 0.876611 |
| Andean Latin America | 2009 | 0.97062  | 0.890118 |
| Andean Latin America | 2010 | 0.975539 | 0.890804 |
| Andean Latin America | 2011 | 0.970379 | 0.882799 |
| Andean Latin America | 2012 | 1.010809 | 0.91578  |

|                      |      |          |          |
|----------------------|------|----------|----------|
| Andean Latin America | 2013 | 1.013769 | 0.915689 |
| Andean Latin America | 2014 | 1.008176 | 0.908392 |
| Andean Latin America | 2015 | 1.003827 | 0.902681 |
| Andean Latin America | 2016 | 1.013695 | 0.90961  |
| Andean Latin America | 2017 | 1.021095 | 0.915073 |
| Andean Latin America | 2018 | 1.028281 | 0.920944 |
| Andean Latin America | 2019 | 1.042441 | 0.933531 |
| Australasia          | 1990 | 1.256436 | 0.749952 |
| Australasia          | 1991 | 1.251345 | 0.749596 |
| Australasia          | 1992 | 1.221065 | 0.731598 |
| Australasia          | 1993 | 1.197424 | 0.715706 |
| Australasia          | 1994 | 1.184041 | 0.705074 |
| Australasia          | 1995 | 1.189314 | 0.708414 |



1  
2  
3  
4  
5  
6  
7  
8  
9  
10  
11  
12  
13  
14  
15  
16  
17  
18  
19  
20  
21  
22  
23  
24  
25  
26  
27  
28  
29  
30  
31  
32  
33  
34  
35  
36  
37  
38  
39  
40  
41  
42  
43  
44  
45  
46

|             |      |          |          |
|-------------|------|----------|----------|
| Australasia | 1996 | 1.171815 | 0.699034 |
| Australasia | 1997 | 1.154972 | 0.694376 |
| Australasia | 1998 | 1.125176 | 0.679026 |
| Australasia | 1999 | 1.123    | 0.679313 |
| Australasia | 2000 | 1.107004 | 0.67342  |
| Australasia | 2001 | 1.092594 | 0.667626 |
| Australasia | 2002 | 1.09213  | 0.668502 |
| Australasia | 2003 | 1.073556 | 0.660159 |
| Australasia | 2004 | 1.093004 | 0.674235 |
| Australasia | 2005 | 1.109953 | 0.687767 |
| Australasia | 2006 | 1.11501  | 0.694533 |
| Australasia | 2007 | 1.119263 | 0.702944 |
| Australasia | 2008 | 1.12093  | 0.709291 |

|             |      |          |          |
|-------------|------|----------|----------|
| Australasia | 2009 | 1.12578  | 0.717931 |
| Australasia | 2010 | 1.119825 | 0.719347 |
| Australasia | 2011 | 1.110324 | 0.720219 |
| Australasia | 2012 | 1.102299 | 0.723081 |
| Australasia | 2013 | 1.092797 | 0.725804 |
| Australasia | 2014 | 1.087757 | 0.72868  |
| Australasia | 2015 | 1.082458 | 0.732461 |
| Australasia | 2016 | 1.075631 | 0.733734 |
| Australasia | 2017 | 1.056633 | 0.72804  |
| Australasia | 2018 | 1.040454 | 0.72481  |
| Australasia | 2019 | 1.025964 | 0.721186 |
| Caribbean   | 1990 | 0.778203 | 0.705687 |
| Caribbean   | 1991 | 0.789518 | 0.714482 |

1  
2  
3  
4  
5  
6  
7  
8  
9  
10  
11  
12  
13  
14  
15  
16  
17  
18  
19  
20  
21  
22  
23  
24  
25  
26  
27  
28  
29  
30  
31  
32  
33  
34  
35  
36  
37  
38  
39  
40  
41  
42  
43  
44  
45  
46

|           |      |          |          |
|-----------|------|----------|----------|
| Caribbean | 1992 | 0.790374 | 0.71231  |
| Caribbean | 1993 | 0.795133 | 0.714068 |
| Caribbean | 1994 | 0.794694 | 0.711298 |
| Caribbean | 1995 | 0.795712 | 0.709507 |
| Caribbean | 1996 | 0.799616 | 0.710759 |
| Caribbean | 1997 | 0.797003 | 0.706666 |
| Caribbean | 1998 | 0.795225 | 0.702657 |
| Caribbean | 1999 | 0.806613 | 0.710478 |
| Caribbean | 2000 | 0.84186  | 0.739455 |
| Caribbean | 2001 | 0.85681  | 0.751266 |
| Caribbean | 2002 | 0.865068 | 0.757623 |
| Caribbean | 2003 | 0.877107 | 0.766409 |
| Caribbean | 2004 | 0.894996 | 0.780393 |

|           |      |          |          |
|-----------|------|----------|----------|
| Caribbean | 2005 | 0.901407 | 0.785161 |
| Caribbean | 2006 | 0.90325  | 0.786336 |
| Caribbean | 2007 | 0.896328 | 0.779649 |
| Caribbean | 2008 | 0.888385 | 0.771347 |
| Caribbean | 2009 | 0.877739 | 0.760608 |
| Caribbean | 2010 | 0.902529 | 0.780843 |
| Caribbean | 2011 | 0.894764 | 0.774198 |
| Caribbean | 2012 | 0.897262 | 0.776873 |
| Caribbean | 2013 | 0.897109 | 0.776448 |
| Caribbean | 2014 | 0.895273 | 0.774364 |
| Caribbean | 2015 | 0.890096 | 0.769517 |
| Caribbean | 2016 | 0.888374 | 0.767038 |
| Caribbean | 2017 | 0.887092 | 0.764536 |

1  
2  
3  
4  
5  
6  
7  
8  
9  
10  
11  
12  
13  
14  
15  
16  
17  
18  
19  
20  
21  
22  
23  
24  
25  
26  
27  
28  
29  
30  
31  
32  
33  
34  
35  
36  
37  
38  
39  
40  
41  
42  
43  
44  
45  
46

|              |      |          |          |
|--------------|------|----------|----------|
| Caribbean    | 2018 | 0.894349 | 0.768945 |
| Caribbean    | 2019 | 0.900884 | 0.773334 |
| Central Asia | 1990 | 0.993776 | 0.730286 |
| Central Asia | 1991 | 0.991773 | 0.731194 |
| Central Asia | 1992 | 0.989487 | 0.735739 |
| Central Asia | 1993 | 0.982871 | 0.732542 |
| Central Asia | 1994 | 0.967481 | 0.724436 |
| Central Asia | 1995 | 0.953222 | 0.716344 |
| Central Asia | 1996 | 0.932845 | 0.703873 |
| Central Asia | 1997 | 0.939018 | 0.708663 |
| Central Asia | 1998 | 0.942864 | 0.711008 |
| Central Asia | 1999 | 0.93285  | 0.706787 |
| Central Asia | 2000 | 0.914752 | 0.697569 |

|              |      |          |          |
|--------------|------|----------|----------|
| Central Asia | 2001 | 0.90155  | 0.688619 |
| Central Asia | 2002 | 0.889552 | 0.67599  |
| Central Asia | 2003 | 0.880783 | 0.667315 |
| Central Asia | 2004 | 0.876683 | 0.667546 |
| Central Asia | 2005 | 0.878457 | 0.676155 |
| Central Asia | 2006 | 0.867182 | 0.670221 |
| Central Asia | 2007 | 0.861093 | 0.665534 |
| Central Asia | 2008 | 0.858393 | 0.661361 |
| Central Asia | 2009 | 0.865353 | 0.664304 |
| Central Asia | 2010 | 0.870146 | 0.66312  |
| Central Asia | 2011 | 0.864532 | 0.659123 |
| Central Asia | 2012 | 0.866978 | 0.660768 |
| Central Asia | 2013 | 0.863849 | 0.658662 |

1  
2  
3  
4  
5  
6  
7  
8  
9  
10  
11  
12  
13  
14  
15  
16  
17  
18  
19  
20  
21  
22  
23  
24  
25  
26  
27  
28  
29  
30  
31  
32  
33  
34  
35  
36  
37  
38  
39  
40  
41  
42  
43  
44  
45  
46

|                |      |          |          |
|----------------|------|----------|----------|
| Central Asia   | 2014 | 0.851903 | 0.644534 |
| Central Asia   | 2015 | 0.851577 | 0.639005 |
| Central Asia   | 2016 | 0.849903 | 0.637999 |
| Central Asia   | 2017 | 0.850543 | 0.637766 |
| Central Asia   | 2018 | 0.846082 | 0.636936 |
| Central Asia   | 2019 | 0.848602 | 0.64247  |
| Central Europe | 1990 | 0.955491 | 0.661719 |
| Central Europe | 1991 | 0.961364 | 0.663657 |
| Central Europe | 1992 | 0.957234 | 0.658579 |
| Central Europe | 1993 | 0.965166 | 0.660903 |
| Central Europe | 1994 | 0.966613 | 0.660389 |
| Central Europe | 1995 | 0.971466 | 0.661423 |
| Central Europe | 1996 | 0.979487 | 0.662808 |

|                |      |          |          |
|----------------|------|----------|----------|
| Central Europe | 1997 | 0.989711 | 0.667123 |
| Central Europe | 1998 | 0.99268  | 0.662612 |
| Central Europe | 1999 | 1.007421 | 0.665519 |
| Central Europe | 2000 | 1.009404 | 0.66032  |
| Central Europe | 2001 | 1.001136 | 0.650922 |
| Central Europe | 2002 | 0.99002  | 0.639423 |
| Central Europe | 2003 | 0.985822 | 0.633371 |
| Central Europe | 2004 | 0.987337 | 0.630977 |
| Central Europe | 2005 | 0.996463 | 0.635996 |
| Central Europe | 2006 | 1.012738 | 0.645361 |
| Central Europe | 2007 | 1.033613 | 0.65755  |
| Central Europe | 2008 | 1.022364 | 0.649222 |
| Central Europe | 2009 | 1.028734 | 0.651344 |



1  
2  
3  
4  
5  
6  
7  
8  
9  
10  
11  
12  
13  
14  
15  
16  
17  
18  
19  
20  
21  
22  
23  
24  
25  
26  
27  
28  
29  
30  
31  
32  
33  
34  
35  
36  
37  
38  
39  
40  
41  
42  
43  
44  
45  
46

|                       |      |          |          |
|-----------------------|------|----------|----------|
| Central Europe        | 2010 | 1.028359 | 0.649302 |
| Central Europe        | 2011 | 1.026432 | 0.646255 |
| Central Europe        | 2012 | 1.039093 | 0.651483 |
| Central Europe        | 2013 | 1.047601 | 0.653682 |
| Central Europe        | 2014 | 1.058371 | 0.659537 |
| Central Europe        | 2015 | 1.069497 | 0.665303 |
| Central Europe        | 2016 | 1.065577 | 0.663071 |
| Central Europe        | 2017 | 1.059955 | 0.660605 |
| Central Europe        | 2018 | 1.058167 | 0.660511 |
| Central Europe        | 2019 | 1.056385 | 0.660778 |
| Central Latin America | 1990 | 0.977794 | 0.906047 |
| Central Latin America | 1991 | 0.960958 | 0.88965  |
| Central Latin America | 1992 | 0.96836  | 0.891993 |

|                       |      |          |          |
|-----------------------|------|----------|----------|
| Central Latin America | 1993 | 0.96676  | 0.885486 |
| Central Latin America | 1994 | 0.960737 | 0.875372 |
| Central Latin America | 1995 | 0.974102 | 0.885237 |
| Central Latin America | 1996 | 0.980331 | 0.887809 |
| Central Latin America | 1997 | 0.986228 | 0.890212 |
| Central Latin America | 1998 | 0.984161 | 0.884764 |
| Central Latin America | 1999 | 0.993865 | 0.890436 |
| Central Latin America | 2000 | 0.974373 | 0.871688 |
| Central Latin America | 2001 | 0.977773 | 0.871958 |
| Central Latin America | 2002 | 0.955348 | 0.848128 |
| Central Latin America | 2003 | 0.953418 | 0.84444  |
| Central Latin America | 2004 | 0.949965 | 0.839949 |
| Central Latin America | 2005 | 0.94173  | 0.832021 |

|                       |      |          |          |
|-----------------------|------|----------|----------|
| Central Latin America | 2006 | 0.929669 | 0.819435 |
| Central Latin America | 2007 | 0.928761 | 0.817536 |
| Central Latin America | 2008 | 0.913732 | 0.801903 |
| Central Latin America | 2009 | 0.918766 | 0.802136 |
| Central Latin America | 2010 | 0.932299 | 0.811422 |
| Central Latin America | 2011 | 0.923423 | 0.801163 |
| Central Latin America | 2012 | 0.916951 | 0.792063 |
| Central Latin America | 2013 | 0.906908 | 0.780367 |
| Central Latin America | 2014 | 0.915868 | 0.78579  |
| Central Latin America | 2015 | 0.904761 | 0.774169 |
| Central Latin America | 2016 | 0.894395 | 0.763281 |
| Central Latin America | 2017 | 0.878355 | 0.747275 |
| Central Latin America | 2018 | 0.879571 | 0.745725 |

|                            |      |          |          |
|----------------------------|------|----------|----------|
| Central Latin America      | 2019 | 0.873385 | 0.737332 |
| Central Sub-Saharan Africa | 1990 | 0.683461 | 0.582902 |
| Central Sub-Saharan Africa | 1991 | 0.694933 | 0.587758 |
| Central Sub-Saharan Africa | 1992 | 0.702424 | 0.589793 |
| Central Sub-Saharan Africa | 1993 | 0.714943 | 0.595657 |
| Central Sub-Saharan Africa | 1994 | 0.724653 | 0.59941  |
| Central Sub-Saharan Africa | 1995 | 0.732751 | 0.601448 |
| Central Sub-Saharan Africa | 1996 | 0.756166 | 0.614733 |
| Central Sub-Saharan Africa | 1997 | 0.757363 | 0.61014  |
| Central Sub-Saharan Africa | 1998 | 0.770799 | 0.615205 |
| Central Sub-Saharan Africa | 1999 | 0.783386 | 0.61934  |
| Central Sub-Saharan Africa | 2000 | 0.797995 | 0.624623 |
| Central Sub-Saharan Africa | 2001 | 0.813766 | 0.632481 |

|                            |      |          |          |
|----------------------------|------|----------|----------|
| Central Sub-Saharan Africa | 2002 | 0.833085 | 0.642304 |
| Central Sub-Saharan Africa | 2003 | 0.848224 | 0.65191  |
| Central Sub-Saharan Africa | 2004 | 0.857761 | 0.656619 |
| Central Sub-Saharan Africa | 2005 | 0.863588 | 0.659505 |
| Central Sub-Saharan Africa | 2006 | 0.861856 | 0.658283 |
| Central Sub-Saharan Africa | 2007 | 0.855563 | 0.655166 |
| Central Sub-Saharan Africa | 2008 | 0.851145 | 0.653598 |
| Central Sub-Saharan Africa | 2009 | 0.845802 | 0.651726 |
| Central Sub-Saharan Africa | 2010 | 0.838533 | 0.647863 |
| Central Sub-Saharan Africa | 2011 | 0.83013  | 0.644303 |
| Central Sub-Saharan Africa | 2012 | 0.823208 | 0.641886 |
| Central Sub-Saharan Africa | 2013 | 0.81738  | 0.640355 |
| Central Sub-Saharan Africa | 2014 | 0.813554 | 0.640249 |

|                            |      |          |          |
|----------------------------|------|----------|----------|
| Central Sub-Saharan Africa | 2015 | 0.81476  | 0.642448 |
| Central Sub-Saharan Africa | 2016 | 0.815014 | 0.646596 |
| Central Sub-Saharan Africa | 2017 | 0.815435 | 0.651542 |
| Central Sub-Saharan Africa | 2018 | 0.813046 | 0.653874 |
| Central Sub-Saharan Africa | 2019 | 0.812155 | 0.657802 |
| East Asia                  | 1990 | 0.978254 | 0.818335 |
| East Asia                  | 1991 | 0.969935 | 0.811948 |
| East Asia                  | 1992 | 0.969225 | 0.811294 |
| East Asia                  | 1993 | 0.975501 | 0.816535 |
| East Asia                  | 1994 | 0.983547 | 0.817634 |
| East Asia                  | 1995 | 0.970594 | 0.806198 |
| East Asia                  | 1996 | 0.968826 | 0.803903 |
| East Asia                  | 1997 | 0.972998 | 0.805497 |

1  
2  
3  
4  
5  
6  
7  
8  
9  
10  
11  
12  
13  
14  
15  
16  
17  
18  
19  
20  
21  
22  
23  
24  
25  
26  
27  
28  
29  
30  
31  
32  
33  
34  
35  
36  
37  
38  
39  
40  
41  
42  
43  
44  
45  
46

|           |      |          |          |
|-----------|------|----------|----------|
| East Asia | 1998 | 0.970348 | 0.796676 |
| East Asia | 1999 | 0.973644 | 0.800535 |
| East Asia | 2000 | 0.973907 | 0.806971 |
| East Asia | 2001 | 0.961738 | 0.796409 |
| East Asia | 2002 | 0.943917 | 0.783934 |
| East Asia | 2003 | 0.933697 | 0.779517 |
| East Asia | 2004 | 0.918842 | 0.76399  |
| East Asia | 2005 | 0.899777 | 0.742355 |
| East Asia | 2006 | 0.909001 | 0.745431 |
| East Asia | 2007 | 0.904869 | 0.737149 |
| East Asia | 2008 | 0.898908 | 0.729162 |
| East Asia | 2009 | 0.893633 | 0.720614 |
| East Asia | 2010 | 0.891647 | 0.714709 |

|                |      |          |          |
|----------------|------|----------|----------|
| East Asia      | 2011 | 0.88997  | 0.706791 |
| East Asia      | 2012 | 0.868837 | 0.683317 |
| East Asia      | 2013 | 0.864019 | 0.674571 |
| East Asia      | 2014 | 0.860397 | 0.670162 |
| East Asia      | 2015 | 0.851087 | 0.659093 |
| East Asia      | 2016 | 0.854883 | 0.658215 |
| East Asia      | 2017 | 0.873032 | 0.671291 |
| East Asia      | 2018 | 0.892832 | 0.68718  |
| East Asia      | 2019 | 0.901698 | 0.691723 |
| Eastern Europe | 1990 | 1.23365  | 0.659579 |
| Eastern Europe | 1991 | 1.234032 | 0.661635 |
| Eastern Europe | 1992 | 1.179967 | 0.645697 |
| Eastern Europe | 1993 | 1.111938 | 0.629129 |



|                |      |          |          |
|----------------|------|----------|----------|
| Eastern Europe | 1994 | 1.083014 | 0.624362 |
| Eastern Europe | 1995 | 1.097775 | 0.626929 |
| Eastern Europe | 1996 | 1.136801 | 0.636876 |
| Eastern Europe | 1997 | 1.189719 | 0.652769 |
| Eastern Europe | 1998 | 1.200466 | 0.655556 |
| Eastern Europe | 1999 | 1.165156 | 0.646959 |
| Eastern Europe | 2000 | 1.133588 | 0.634773 |
| Eastern Europe | 2001 | 1.144775 | 0.639602 |
| Eastern Europe | 2002 | 1.145428 | 0.641292 |
| Eastern Europe | 2003 | 1.148307 | 0.645278 |
| Eastern Europe | 2004 | 1.147171 | 0.643072 |
| Eastern Europe | 2005 | 1.129964 | 0.635679 |
| Eastern Europe | 2006 | 1.160568 | 0.640647 |

|                |      |          |          |
|----------------|------|----------|----------|
| Eastern Europe | 2007 | 1.178074 | 0.645161 |
| Eastern Europe | 2008 | 1.173178 | 0.640809 |
| Eastern Europe | 2009 | 1.213267 | 0.652961 |
| Eastern Europe | 2010 | 1.216113 | 0.651057 |
| Eastern Europe | 2011 | 1.24856  | 0.661311 |
| Eastern Europe | 2012 | 1.26107  | 0.663132 |
| Eastern Europe | 2013 | 1.276739 | 0.668352 |
| Eastern Europe | 2014 | 1.282237 | 0.669976 |
| Eastern Europe | 2015 | 1.273576 | 0.668279 |
| Eastern Europe | 2016 | 1.293772 | 0.676652 |
| Eastern Europe | 2017 | 1.330071 | 0.693054 |
| Eastern Europe | 2018 | 1.325354 | 0.691408 |
| Eastern Europe | 2019 | 1.316541 | 0.688636 |

1  
2  
3  
4  
5  
6  
7  
8  
9  
10  
11  
12  
13  
14  
15  
16  
17  
18  
19  
20  
21  
22  
23  
24  
25  
26  
27  
28  
29  
30  
31  
32  
33  
34  
35  
36  
37  
38  
39  
40  
41  
42  
43  
44  
45  
46

|                            |      |          |          |
|----------------------------|------|----------|----------|
| Eastern Sub-Saharan Africa | 1990 | 0.723735 | 0.659766 |
| Eastern Sub-Saharan Africa | 1991 | 0.716556 | 0.652735 |
| Eastern Sub-Saharan Africa | 1992 | 0.71224  | 0.648871 |
| Eastern Sub-Saharan Africa | 1993 | 0.705678 | 0.643593 |
| Eastern Sub-Saharan Africa | 1994 | 0.702762 | 0.640668 |
| Eastern Sub-Saharan Africa | 1995 | 0.698844 | 0.636628 |
| Eastern Sub-Saharan Africa | 1996 | 0.697362 | 0.635147 |
| Eastern Sub-Saharan Africa | 1997 | 0.698754 | 0.636152 |
| Eastern Sub-Saharan Africa | 1998 | 0.702868 | 0.639227 |
| Eastern Sub-Saharan Africa | 1999 | 0.705082 | 0.639977 |
| Eastern Sub-Saharan Africa | 2000 | 0.700715 | 0.635388 |
| Eastern Sub-Saharan Africa | 2001 | 0.699235 | 0.632593 |
| Eastern Sub-Saharan Africa | 2002 | 0.700728 | 0.632842 |

|                            |      |          |          |
|----------------------------|------|----------|----------|
| Eastern Sub-Saharan Africa | 2003 | 0.702876 | 0.634288 |
| Eastern Sub-Saharan Africa | 2004 | 0.704983 | 0.635906 |
| Eastern Sub-Saharan Africa | 2005 | 0.708518 | 0.638477 |
| Eastern Sub-Saharan Africa | 2006 | 0.707323 | 0.63662  |
| Eastern Sub-Saharan Africa | 2007 | 0.705661 | 0.634556 |
| Eastern Sub-Saharan Africa | 2008 | 0.703491 | 0.632789 |
| Eastern Sub-Saharan Africa | 2009 | 0.706474 | 0.635204 |
| Eastern Sub-Saharan Africa | 2010 | 0.711105 | 0.639797 |
| Eastern Sub-Saharan Africa | 2011 | 0.718351 | 0.646421 |
| Eastern Sub-Saharan Africa | 2012 | 0.723635 | 0.651391 |
| Eastern Sub-Saharan Africa | 2013 | 0.730521 | 0.657747 |
| Eastern Sub-Saharan Africa | 2014 | 0.735582 | 0.663012 |
| Eastern Sub-Saharan Africa | 2015 | 0.741687 | 0.668864 |

|                            |      |          |          |
|----------------------------|------|----------|----------|
| Eastern Sub-Saharan Africa | 2016 | 0.745789 | 0.673767 |
| Eastern Sub-Saharan Africa | 2017 | 0.752803 | 0.681804 |
| Eastern Sub-Saharan Africa | 2018 | 0.757852 | 0.687995 |
| Eastern Sub-Saharan Africa | 2019 | 0.762287 | 0.693751 |
| High-income Asia Pacific   | 1990 | 1.039751 | 0.667137 |
| High-income Asia Pacific   | 1991 | 1.043418 | 0.661266 |
| High-income Asia Pacific   | 1992 | 1.054406 | 0.660081 |
| High-income Asia Pacific   | 1993 | 1.065479 | 0.660206 |
| High-income Asia Pacific   | 1994 | 1.074912 | 0.660328 |
| High-income Asia Pacific   | 1995 | 1.08229  | 0.66066  |
| High-income Asia Pacific   | 1996 | 1.099512 | 0.667777 |
| High-income Asia Pacific   | 1997 | 1.103374 | 0.665346 |
| High-income Asia Pacific   | 1998 | 1.090814 | 0.652463 |

|                          |      |          |          |
|--------------------------|------|----------|----------|
| High-income Asia Pacific | 1999 | 1.080631 | 0.640419 |
| High-income Asia Pacific | 2000 | 1.077246 | 0.633324 |
| High-income Asia Pacific | 2001 | 1.078976 | 0.628989 |
| High-income Asia Pacific | 2002 | 1.083506 | 0.625751 |
| High-income Asia Pacific | 2003 | 1.079641 | 0.618161 |
| High-income Asia Pacific | 2004 | 1.086294 | 0.616881 |
| High-income Asia Pacific | 2005 | 1.078453 | 0.606349 |
| High-income Asia Pacific | 2006 | 1.085594 | 0.604766 |
| High-income Asia Pacific | 2007 | 1.076784 | 0.596348 |
| High-income Asia Pacific | 2008 | 1.064816 | 0.586519 |
| High-income Asia Pacific | 2009 | 1.046166 | 0.57464  |
| High-income Asia Pacific | 2010 | 1.038285 | 0.567576 |
| High-income Asia Pacific | 2011 | 1.055017 | 0.574227 |

|                           |      |          |          |
|---------------------------|------|----------|----------|
| High-income Asia Pacific  | 2012 | 1.065024 | 0.578891 |
| High-income Asia Pacific  | 2013 | 1.07446  | 0.584658 |
| High-income Asia Pacific  | 2014 | 1.080257 | 0.589475 |
| High-income Asia Pacific  | 2015 | 1.084531 | 0.590498 |
| High-income Asia Pacific  | 2016 | 1.093062 | 0.595518 |
| High-income Asia Pacific  | 2017 | 1.092684 | 0.597114 |
| High-income Asia Pacific  | 2018 | 1.106932 | 0.607797 |
| High-income Asia Pacific  | 2019 | 1.109359 | 0.612461 |
| High-income North America | 1990 | 1.118132 | 0.672668 |
| High-income North America | 1991 | 1.117006 | 0.672201 |
| High-income North America | 1992 | 1.115077 | 0.671045 |
| High-income North America | 1993 | 1.113464 | 0.670112 |
| High-income North America | 1994 | 1.122594 | 0.675419 |

|                           |      |          |          |
|---------------------------|------|----------|----------|
| High-income North America | 1995 | 1.124872 | 0.677823 |
| High-income North America | 1996 | 1.141051 | 0.688329 |
| High-income North America | 1997 | 1.152169 | 0.697537 |
| High-income North America | 1998 | 1.158742 | 0.704401 |
| High-income North America | 1999 | 1.166107 | 0.713378 |
| High-income North America | 2000 | 1.177151 | 0.724467 |
| High-income North America | 2001 | 1.177024 | 0.729607 |
| High-income North America | 2002 | 1.16057  | 0.723799 |
| High-income North America | 2003 | 1.151264 | 0.723251 |
| High-income North America | 2004 | 1.157041 | 0.731177 |
| High-income North America | 2005 | 1.157996 | 0.736166 |
| High-income North America | 2006 | 1.168287 | 0.747508 |
| High-income North America | 2007 | 1.174861 | 0.756554 |



1  
2  
3  
4  
5  
6  
7  
8  
9  
10  
11  
12  
13  
14  
15  
16  
17  
18  
19  
20  
21  
22  
23  
24  
25  
26  
27  
28  
29  
30  
31  
32  
33  
34  
35  
36  
37  
38  
39  
40  
41  
42  
43  
44  
45  
46

|                              |      |          |          |
|------------------------------|------|----------|----------|
| High-income North America    | 2008 | 1.157709 | 0.751119 |
| High-income North America    | 2009 | 1.138461 | 0.745004 |
| High-income North America    | 2010 | 1.115781 | 0.735584 |
| High-income North America    | 2011 | 1.103844 | 0.734535 |
| High-income North America    | 2012 | 1.083181 | 0.727639 |
| High-income North America    | 2013 | 1.057522 | 0.717919 |
| High-income North America    | 2014 | 1.05067  | 0.720224 |
| High-income North America    | 2015 | 1.041592 | 0.720859 |
| High-income North America    | 2016 | 1.023499 | 0.715467 |
| High-income North America    | 2017 | 1.003664 | 0.707465 |
| High-income North America    | 2018 | 0.977158 | 0.692149 |
| High-income North America    | 2019 | 0.996235 | 0.70587  |
| North Africa and Middle East | 1990 | 0.992053 | 0.929902 |

|                              |      |          |          |
|------------------------------|------|----------|----------|
| North Africa and Middle East | 1991 | 0.999587 | 0.945749 |
| North Africa and Middle East | 1992 | 0.9933   | 0.945798 |
| North Africa and Middle East | 1993 | 0.991348 | 0.94837  |
| North Africa and Middle East | 1994 | 0.994314 | 0.95637  |
| North Africa and Middle East | 1995 | 0.992249 | 0.956899 |
| North Africa and Middle East | 1996 | 0.997432 | 0.963296 |
| North Africa and Middle East | 1997 | 0.988848 | 0.952588 |
| North Africa and Middle East | 1998 | 0.984311 | 0.946822 |
| North Africa and Middle East | 1999 | 0.989991 | 0.956975 |
| North Africa and Middle East | 2000 | 0.99719  | 0.973325 |
| North Africa and Middle East | 2001 | 0.988859 | 0.958619 |
| North Africa and Middle East | 2002 | 0.972092 | 0.932539 |
| North Africa and Middle East | 2003 | 0.965162 | 0.921957 |

1  
2  
3  
4  
5  
6  
7  
8  
9  
10  
11  
12  
13  
14  
15  
16  
17  
18  
19  
20  
21  
22  
23  
24  
25  
26  
27  
28  
29  
30  
31  
32  
33  
34  
35  
36  
37  
38  
39  
40  
41  
42  
43  
44  
45  
46

|                              |      |          |          |
|------------------------------|------|----------|----------|
| North Africa and Middle East | 2004 | 0.972897 | 0.926071 |
| North Africa and Middle East | 2005 | 0.989718 | 0.947247 |
| North Africa and Middle East | 2006 | 1.004557 | 0.974732 |
| North Africa and Middle East | 2007 | 1.01095  | 0.99362  |
| North Africa and Middle East | 2008 | 1.017714 | 1.012304 |
| North Africa and Middle East | 2009 | 1.015727 | 1.017749 |
| North Africa and Middle East | 2010 | 1.014014 | 1.01966  |
| North Africa and Middle East | 2011 | 1.001629 | 1.011346 |
| North Africa and Middle East | 2012 | 1.002972 | 1.013633 |
| North Africa and Middle East | 2013 | 0.984389 | 0.993935 |
| North Africa and Middle East | 2014 | 0.990925 | 1.001141 |
| North Africa and Middle East | 2015 | 1.002549 | 1.012016 |
| North Africa and Middle East | 2016 | 1.010398 | 1.021392 |

|                              |      |          |          |
|------------------------------|------|----------|----------|
| North Africa and Middle East | 2017 | 1.014892 | 1.02737  |
| North Africa and Middle East | 2018 | 1.018101 | 1.032525 |
| North Africa and Middle East | 2019 | 1.017794 | 1.032346 |
| Oceania                      | 1990 | 0.714981 | 0.712764 |
| Oceania                      | 1991 | 0.713966 | 0.709276 |
| Oceania                      | 1992 | 0.715391 | 0.707661 |
| Oceania                      | 1993 | 0.716127 | 0.705628 |
| Oceania                      | 1994 | 0.717851 | 0.704957 |
| Oceania                      | 1995 | 0.720437 | 0.708679 |
| Oceania                      | 1996 | 0.728436 | 0.718749 |
| Oceania                      | 1997 | 0.73471  | 0.724774 |
| Oceania                      | 1998 | 0.74027  | 0.731    |
| Oceania                      | 1999 | 0.740747 | 0.73015  |

1  
2  
3  
4  
5  
6  
7  
8  
9  
10  
11  
12  
13  
14  
15  
16  
17  
18  
19  
20  
21  
22  
23  
24  
25  
26  
27  
28  
29  
30  
31  
32  
33  
34  
35  
36  
37  
38  
39  
40  
41  
42  
43  
44  
45  
46

|         |      |          |          |
|---------|------|----------|----------|
| Oceania | 2000 | 0.739459 | 0.729167 |
| Oceania | 2001 | 0.732115 | 0.724288 |
| Oceania | 2002 | 0.737227 | 0.727466 |
| Oceania | 2003 | 0.745093 | 0.73641  |
| Oceania | 2004 | 0.743631 | 0.734994 |
| Oceania | 2005 | 0.727771 | 0.719476 |
| Oceania | 2006 | 0.721573 | 0.712822 |
| Oceania | 2007 | 0.715807 | 0.705716 |
| Oceania | 2008 | 0.711278 | 0.705836 |
| Oceania | 2009 | 0.708497 | 0.704765 |
| Oceania | 2010 | 0.697016 | 0.695086 |
| Oceania | 2011 | 0.685978 | 0.686528 |
| Oceania | 2012 | 0.677235 | 0.68009  |

|            |      |          |          |
|------------|------|----------|----------|
| Oceania    | 2013 | 0.672653 | 0.677716 |
| Oceania    | 2014 | 0.668907 | 0.674571 |
| Oceania    | 2015 | 0.668124 | 0.67487  |
| Oceania    | 2016 | 0.667828 | 0.674982 |
| Oceania    | 2017 | 0.664246 | 0.672026 |
| Oceania    | 2018 | 0.659172 | 0.669561 |
| Oceania    | 2019 | 0.660332 | 0.672439 |
| South Asia | 1990 | 0.66507  | 0.698583 |
| South Asia | 1991 | 0.661937 | 0.69396  |
| South Asia | 1992 | 0.675911 | 0.704971 |
| South Asia | 1993 | 0.671216 | 0.699226 |
| South Asia | 1994 | 0.670005 | 0.695142 |
| South Asia | 1995 | 0.673903 | 0.695892 |

1  
2  
3  
4  
5  
6  
7  
8  
9  
10  
11  
12  
13  
14  
15  
16  
17  
18  
19  
20  
21  
22  
23  
24  
25  
26  
27  
28  
29  
30  
31  
32  
33  
34  
35  
36  
37  
38  
39  
40  
41  
42  
43  
44  
45  
46

|            |      |          |          |
|------------|------|----------|----------|
| South Asia | 1996 | 0.673456 | 0.689668 |
| South Asia | 1997 | 0.675591 | 0.688244 |
| South Asia | 1998 | 0.68373  | 0.697407 |
| South Asia | 1999 | 0.682567 | 0.698546 |
| South Asia | 2000 | 0.669169 | 0.681507 |
| South Asia | 2001 | 0.669284 | 0.679742 |
| South Asia | 2002 | 0.667592 | 0.676094 |
| South Asia | 2003 | 0.654533 | 0.65867  |
| South Asia | 2004 | 0.648943 | 0.64878  |
| South Asia | 2005 | 0.646784 | 0.643141 |
| South Asia | 2006 | 0.64926  | 0.645759 |
| South Asia | 2007 | 0.650865 | 0.646551 |
| South Asia | 2008 | 0.644718 | 0.637315 |

|                |      |          |          |
|----------------|------|----------|----------|
| South Asia     | 2009 | 0.648902 | 0.634807 |
| South Asia     | 2010 | 0.661674 | 0.639831 |
| South Asia     | 2011 | 0.666136 | 0.642593 |
| South Asia     | 2012 | 0.677551 | 0.653581 |
| South Asia     | 2013 | 0.700175 | 0.664938 |
| South Asia     | 2014 | 0.725503 | 0.679458 |
| South Asia     | 2015 | 0.75062  | 0.703432 |
| South Asia     | 2016 | 0.752504 | 0.708796 |
| South Asia     | 2017 | 0.754074 | 0.711262 |
| South Asia     | 2018 | 0.755202 | 0.708314 |
| South Asia     | 2019 | 0.759717 | 0.712613 |
| Southeast Asia | 1990 | 0.996027 | 0.865118 |
| Southeast Asia | 1991 | 0.986435 | 0.857618 |



1  
2  
3  
4  
5  
6  
7  
8  
9  
10  
11  
12  
13  
14  
15  
16  
17  
18  
19  
20  
21  
22  
23  
24  
25  
26  
27  
28  
29  
30  
31  
32  
33  
34  
35  
36  
37  
38  
39  
40  
41  
42  
43  
44  
45  
46

|                |      |          |          |
|----------------|------|----------|----------|
| Southeast Asia | 1992 | 0.979521 | 0.851068 |
| Southeast Asia | 1993 | 0.975002 | 0.847726 |
| Southeast Asia | 1994 | 0.966841 | 0.841815 |
| Southeast Asia | 1995 | 0.959653 | 0.8355   |
| Southeast Asia | 1996 | 0.958879 | 0.833157 |
| Southeast Asia | 1997 | 0.967228 | 0.835268 |
| Southeast Asia | 1998 | 0.968374 | 0.828115 |
| Southeast Asia | 1999 | 0.974419 | 0.832331 |
| Southeast Asia | 2000 | 0.982661 | 0.837888 |
| Southeast Asia | 2001 | 0.989978 | 0.845043 |
| Southeast Asia | 2002 | 1.00304  | 0.857111 |
| Southeast Asia | 2003 | 1.00702  | 0.86077  |
| Southeast Asia | 2004 | 1.010903 | 0.865647 |

|                |      |          |          |
|----------------|------|----------|----------|
| Southeast Asia | 2005 | 1.009594 | 0.864883 |
| Southeast Asia | 2006 | 1.006894 | 0.863283 |
| Southeast Asia | 2007 | 1.004802 | 0.862165 |
| Southeast Asia | 2008 | 0.998931 | 0.857502 |
| Southeast Asia | 2009 | 0.993168 | 0.853077 |
| Southeast Asia | 2010 | 0.985052 | 0.846161 |
| Southeast Asia | 2011 | 0.972286 | 0.836049 |
| Southeast Asia | 2012 | 0.961676 | 0.827129 |
| Southeast Asia | 2013 | 0.957614 | 0.824501 |
| Southeast Asia | 2014 | 0.947844 | 0.816169 |
| Southeast Asia | 2015 | 0.944072 | 0.811403 |
| Southeast Asia | 2016 | 0.944548 | 0.810911 |
| Southeast Asia | 2017 | 0.954061 | 0.817224 |

1  
2  
3  
4  
5  
6  
7  
8  
9  
10  
11  
12  
13  
14  
15  
16  
17  
18  
19  
20  
21  
22  
23  
24  
25  
26  
27  
28  
29  
30  
31  
32  
33  
34  
35  
36  
37  
38  
39  
40  
41  
42  
43  
44  
45  
46

|                        |      |          |          |
|------------------------|------|----------|----------|
| Southeast Asia         | 2018 | 0.963672 | 0.823881 |
| Southeast Asia         | 2019 | 0.970656 | 0.827904 |
| Southern Latin America | 1990 | 0.836852 | 0.615026 |
| Southern Latin America | 1991 | 0.840997 | 0.616255 |
| Southern Latin America | 1992 | 0.838523 | 0.611796 |
| Southern Latin America | 1993 | 0.846781 | 0.613563 |
| Southern Latin America | 1994 | 0.858913 | 0.620038 |
| Southern Latin America | 1995 | 0.870687 | 0.623389 |
| Southern Latin America | 1996 | 0.877568 | 0.623542 |
| Southern Latin America | 1997 | 0.900245 | 0.635494 |
| Southern Latin America | 1998 | 0.924286 | 0.646916 |
| Southern Latin America | 1999 | 0.940666 | 0.653284 |
| Southern Latin America | 2000 | 0.951995 | 0.657239 |

|                        |      |          |          |
|------------------------|------|----------|----------|
| Southern Latin America | 2001 | 0.954878 | 0.65674  |
| Southern Latin America | 2002 | 0.947038 | 0.648019 |
| Southern Latin America | 2003 | 0.954421 | 0.648565 |
| Southern Latin America | 2004 | 0.958557 | 0.647573 |
| Southern Latin America | 2005 | 0.957894 | 0.645642 |
| Southern Latin America | 2006 | 0.968127 | 0.651186 |
| Southern Latin America | 2007 | 0.96893  | 0.649748 |
| Southern Latin America | 2008 | 0.980789 | 0.657073 |
| Southern Latin America | 2009 | 0.982553 | 0.65619  |
| Southern Latin America | 2010 | 0.995161 | 0.660136 |
| Southern Latin America | 2011 | 1.000659 | 0.661048 |
| Southern Latin America | 2012 | 0.997452 | 0.658189 |
| Southern Latin America | 2013 | 1.004457 | 0.661778 |

1  
2  
3  
4  
5  
6  
7  
8  
9  
10  
11  
12  
13  
14  
15  
16  
17  
18  
19  
20  
21  
22  
23  
24  
25  
26  
27  
28  
29  
30  
31  
32  
33  
34  
35  
36  
37  
38  
39  
40  
41  
42  
43  
44  
45  
46

|                             |      |          |          |
|-----------------------------|------|----------|----------|
| Southern Latin America      | 2014 | 1.008837 | 0.663532 |
| Southern Latin America      | 2015 | 1.005479 | 0.661634 |
| Southern Latin America      | 2016 | 0.998337 | 0.657825 |
| Southern Latin America      | 2017 | 0.994391 | 0.65736  |
| Southern Latin America      | 2018 | 0.995722 | 0.662491 |
| Southern Latin America      | 2019 | 0.992334 | 0.66318  |
| Southern Sub-Saharan Africa | 1990 | 0.799727 | 0.566804 |
| Southern Sub-Saharan Africa | 1991 | 0.776829 | 0.54927  |
| Southern Sub-Saharan Africa | 1992 | 0.820106 | 0.577714 |
| Southern Sub-Saharan Africa | 1993 | 0.774803 | 0.54824  |
| Southern Sub-Saharan Africa | 1994 | 0.788186 | 0.555732 |
| Southern Sub-Saharan Africa | 1995 | 0.709621 | 0.502163 |
| Southern Sub-Saharan Africa | 1996 | 0.706395 | 0.498609 |

|                             |      |          |          |
|-----------------------------|------|----------|----------|
| Southern Sub-Saharan Africa | 1997 | 0.742709 | 0.519068 |
| Southern Sub-Saharan Africa | 1998 | 0.733636 | 0.510162 |
| Southern Sub-Saharan Africa | 1999 | 0.753431 | 0.518147 |
| Southern Sub-Saharan Africa | 2000 | 0.778592 | 0.53112  |
| Southern Sub-Saharan Africa | 2001 | 0.780906 | 0.52916  |
| Southern Sub-Saharan Africa | 2002 | 0.791602 | 0.532937 |
| Southern Sub-Saharan Africa | 2003 | 0.798728 | 0.534572 |
| Southern Sub-Saharan Africa | 2004 | 0.802828 | 0.536106 |
| Southern Sub-Saharan Africa | 2005 | 0.800053 | 0.534634 |
| Southern Sub-Saharan Africa | 2006 | 0.805583 | 0.537221 |
| Southern Sub-Saharan Africa | 2007 | 0.802574 | 0.536309 |
| Southern Sub-Saharan Africa | 2008 | 0.807065 | 0.539654 |
| Southern Sub-Saharan Africa | 2009 | 0.812728 | 0.542922 |

1  
2  
3  
4  
5  
6  
7  
8  
9  
10  
11  
12  
13  
14  
15  
16  
17  
18  
19  
20  
21  
22  
23  
24  
25  
26  
27  
28  
29  
30  
31  
32  
33  
34  
35  
36  
37  
38  
39  
40  
41  
42  
43  
44  
45  
46

|                             |      |          |          |
|-----------------------------|------|----------|----------|
| Southern Sub-Saharan Africa | 2010 | 0.815654 | 0.542544 |
| Southern Sub-Saharan Africa | 2011 | 0.825888 | 0.547379 |
| Southern Sub-Saharan Africa | 2012 | 0.83456  | 0.554376 |
| Southern Sub-Saharan Africa | 2013 | 0.843888 | 0.56142  |
| Southern Sub-Saharan Africa | 2014 | 0.858826 | 0.572506 |
| Southern Sub-Saharan Africa | 2015 | 0.861626 | 0.576232 |
| Southern Sub-Saharan Africa | 2016 | 0.862458 | 0.57647  |
| Southern Sub-Saharan Africa | 2017 | 0.850199 | 0.571158 |
| Southern Sub-Saharan Africa | 2018 | 0.834525 | 0.564877 |
| Southern Sub-Saharan Africa | 2019 | 0.832604 | 0.566608 |
| Tropical Latin America      | 1990 | 0.868384 | 0.734218 |
| Tropical Latin America      | 1991 | 0.871664 | 0.732863 |
| Tropical Latin America      | 1992 | 0.872822 | 0.730195 |

|                        |      |          |          |
|------------------------|------|----------|----------|
| Tropical Latin America | 1993 | 0.870659 | 0.725086 |
| Tropical Latin America | 1994 | 0.872989 | 0.725556 |
| Tropical Latin America | 1995 | 0.8882   | 0.736898 |
| Tropical Latin America | 1996 | 0.90161  | 0.748706 |
| Tropical Latin America | 1997 | 0.912623 | 0.755214 |
| Tropical Latin America | 1998 | 0.915054 | 0.754469 |
| Tropical Latin America | 1999 | 0.919973 | 0.756125 |
| Tropical Latin America | 2000 | 0.92274  | 0.755265 |
| Tropical Latin America | 2001 | 0.92301  | 0.75235  |
| Tropical Latin America | 2002 | 0.925579 | 0.750251 |
| Tropical Latin America | 2003 | 0.914222 | 0.737044 |
| Tropical Latin America | 2004 | 0.908803 | 0.729144 |
| Tropical Latin America | 2005 | 0.909014 | 0.726955 |



1  
2  
3  
4  
5  
6  
7  
8  
9  
10  
11  
12  
13  
14  
15  
16  
17  
18  
19  
20  
21  
22  
23  
24  
25  
26  
27  
28  
29  
30  
31  
32  
33  
34  
35  
36  
37  
38  
39  
40  
41  
42  
43  
44  
45  
46

|                        |      |          |          |
|------------------------|------|----------|----------|
| Tropical Latin America | 2006 | 0.914548 | 0.728219 |
| Tropical Latin America | 2007 | 0.91622  | 0.726039 |
| Tropical Latin America | 2008 | 0.918839 | 0.724886 |
| Tropical Latin America | 2009 | 0.924596 | 0.725983 |
| Tropical Latin America | 2010 | 0.927897 | 0.724711 |
| Tropical Latin America | 2011 | 0.927844 | 0.721599 |
| Tropical Latin America | 2012 | 0.930201 | 0.720433 |
| Tropical Latin America | 2013 | 0.92795  | 0.715936 |
| Tropical Latin America | 2014 | 0.925154 | 0.711512 |
| Tropical Latin America | 2015 | 0.925393 | 0.70904  |
| Tropical Latin America | 2016 | 0.917662 | 0.700946 |
| Tropical Latin America | 2017 | 0.92015  | 0.701317 |
| Tropical Latin America | 2018 | 0.927136 | 0.707273 |

|                        |      |          |          |
|------------------------|------|----------|----------|
| Tropical Latin America | 2019 | 0.922426 | 0.703827 |
| Western Europe         | 1990 | 1.187221 | 0.636881 |
| Western Europe         | 1991 | 1.17978  | 0.631171 |
| Western Europe         | 1992 | 1.179064 | 0.629347 |
| Western Europe         | 1993 | 1.181449 | 0.629072 |
| Western Europe         | 1994 | 1.189826 | 0.632836 |
| Western Europe         | 1995 | 1.191172 | 0.631937 |
| Western Europe         | 1996 | 1.195132 | 0.632473 |
| Western Europe         | 1997 | 1.206631 | 0.637573 |
| Western Europe         | 1998 | 1.213062 | 0.641914 |
| Western Europe         | 1999 | 1.216683 | 0.643583 |
| Western Europe         | 2000 | 1.234761 | 0.651178 |
| Western Europe         | 2001 | 1.2483   | 0.658031 |

1  
2  
3  
4  
5  
6  
7  
8  
9  
10  
11  
12  
13  
14  
15  
16  
17  
18  
19  
20  
21  
22  
23  
24  
25  
26  
27  
28  
29  
30  
31  
32  
33  
34  
35  
36  
37  
38  
39  
40  
41  
42  
43  
44  
45  
46

|                |      |          |          |
|----------------|------|----------|----------|
| Western Europe | 2002 | 1.257153 | 0.663607 |
| Western Europe | 2003 | 1.260606 | 0.667379 |
| Western Europe | 2004 | 1.27021  | 0.674738 |
| Western Europe | 2005 | 1.276144 | 0.679276 |
| Western Europe | 2006 | 1.279993 | 0.683381 |
| Western Europe | 2007 | 1.283076 | 0.68944  |
| Western Europe | 2008 | 1.289726 | 0.697937 |
| Western Europe | 2009 | 1.287437 | 0.701796 |
| Western Europe | 2010 | 1.288567 | 0.70405  |
| Western Europe | 2011 | 1.303959 | 0.711458 |
| Western Europe | 2012 | 1.310276 | 0.715725 |
| Western Europe | 2013 | 1.313979 | 0.720856 |
| Western Europe | 2014 | 1.317178 | 0.725604 |

|                            |      |          |          |
|----------------------------|------|----------|----------|
| Western Europe             | 2015 | 1.310931 | 0.726156 |
| Western Europe             | 2016 | 1.310262 | 0.730428 |
| Western Europe             | 2017 | 1.285904 | 0.726461 |
| Western Europe             | 2018 | 1.279483 | 0.731767 |
| Western Europe             | 2019 | 1.263779 | 0.731772 |
| Western Sub-Saharan Africa | 1990 | 0.943231 | 0.876176 |
| Western Sub-Saharan Africa | 1991 | 0.93766  | 0.874746 |
| Western Sub-Saharan Africa | 1992 | 0.931574 | 0.874356 |
| Western Sub-Saharan Africa | 1993 | 0.922468 | 0.87055  |
| Western Sub-Saharan Africa | 1994 | 0.915253 | 0.867589 |
| Western Sub-Saharan Africa | 1995 | 0.906125 | 0.861331 |
| Western Sub-Saharan Africa | 1996 | 0.896934 | 0.855647 |
| Western Sub-Saharan Africa | 1997 | 0.893333 | 0.854683 |

1  
2  
3  
4  
5  
6  
7  
8  
9  
10  
11  
12  
13  
14  
15  
16  
17  
18  
19  
20  
21  
22  
23  
24  
25  
26  
27  
28  
29  
30  
31  
32  
33  
34  
35  
36  
37  
38  
39  
40  
41  
42  
43  
44  
45  
46

|                            |      |          |          |
|----------------------------|------|----------|----------|
| Western Sub-Saharan Africa | 1998 | 0.884804 | 0.84926  |
| Western Sub-Saharan Africa | 1999 | 0.870291 | 0.83736  |
| Western Sub-Saharan Africa | 2000 | 0.86047  | 0.828306 |
| Western Sub-Saharan Africa | 2001 | 0.852357 | 0.822349 |
| Western Sub-Saharan Africa | 2002 | 0.846533 | 0.817614 |
| Western Sub-Saharan Africa | 2003 | 0.839041 | 0.812645 |
| Western Sub-Saharan Africa | 2004 | 0.830404 | 0.80605  |
| Western Sub-Saharan Africa | 2005 | 0.822259 | 0.798324 |
| Western Sub-Saharan Africa | 2006 | 0.817552 | 0.793607 |
| Western Sub-Saharan Africa | 2007 | 0.812308 | 0.787728 |
| Western Sub-Saharan Africa | 2008 | 0.805224 | 0.779451 |
| Western Sub-Saharan Africa | 2009 | 0.79906  | 0.771461 |
| Western Sub-Saharan Africa | 2010 | 0.794901 | 0.76539  |

|                            |      |          |          |
|----------------------------|------|----------|----------|
| Western Sub-Saharan Africa | 2011 | 0.793234 | 0.761174 |
| Western Sub-Saharan Africa | 2012 | 0.793325 | 0.757741 |
| Western Sub-Saharan Africa | 2013 | 0.790147 | 0.750627 |
| Western Sub-Saharan Africa | 2014 | 0.79643  | 0.752517 |
| Western Sub-Saharan Africa | 2015 | 0.804319 | 0.755615 |
| Western Sub-Saharan Africa | 2016 | 0.812327 | 0.759468 |
| Western Sub-Saharan Africa | 2017 | 0.822265 | 0.764697 |
| Western Sub-Saharan Africa | 2018 | 0.830106 | 0.768468 |
| Western Sub-Saharan Africa | 2019 | 0.839655 | 0.773633 |

**Supplemental table 6. Death cases ratio between females to males and age-standardized death rate (ASDR) ratio between females to males in 204 countries and territories from 1990 to 2019 in 204 countries.**

| location    | year | Ratio of female to male death cases | Ratio of female ASDR to male ASDR |
|-------------|------|-------------------------------------|-----------------------------------|
| Afghanistan | 1990 | 0.961218                            | 0.963112                          |
| Afghanistan | 1991 | 0.961054                            | 0.95357                           |
| Afghanistan | 1992 | 0.957648                            | 0.93756                           |
| Afghanistan | 1993 | 0.960475                            | 0.930057                          |
| Afghanistan | 1994 | 0.965727                            | 0.927966                          |
| Afghanistan | 1995 | 0.967031                            | 0.922941                          |
| Afghanistan | 1996 | 0.96932                             | 0.918637                          |
| Afghanistan | 1997 | 0.969684                            | 0.912595                          |
| Afghanistan | 1998 | 0.972555                            | 0.909395                          |
| Afghanistan | 1999 | 0.980011                            | 0.90888                           |
| Afghanistan | 2000 | 0.985626                            | 0.909379                          |
| Afghanistan | 2001 | 0.993832                            | 0.910933                          |
| Afghanistan | 2002 | 1.000351                            | 0.912563                          |
| Afghanistan | 2003 | 1.015199                            | 0.919405                          |
| Afghanistan | 2004 | 1.036288                            | 0.930023                          |
| Afghanistan | 2005 | 1.050515                            | 0.939235                          |
| Afghanistan | 2006 | 1.060058                            | 0.943996                          |
| Afghanistan | 2007 | 1.06658                             | 0.947329                          |
| Afghanistan | 2008 | 1.078541                            | 0.954077                          |
| Afghanistan | 2009 | 1.09462                             | 0.962852                          |
| Afghanistan | 2010 | 1.110446                            | 0.974819                          |

|    |             |      |          |          |
|----|-------------|------|----------|----------|
| 1  |             |      |          |          |
| 2  |             |      |          |          |
| 3  |             |      |          |          |
| 4  |             |      |          |          |
| 5  | Afghanistan | 2011 | 1.121862 | 0.982551 |
| 6  | Afghanistan | 2012 | 1.126085 | 0.985505 |
| 7  | Afghanistan | 2013 | 1.135187 | 0.991014 |
| 8  | Afghanistan | 2014 | 1.143462 | 0.994594 |
| 9  | Afghanistan | 2015 | 1.148955 | 1.000242 |
| 10 | Afghanistan | 2016 | 1.158044 | 1.008886 |
| 11 | Afghanistan | 2017 | 1.170556 | 1.019302 |
| 12 | Afghanistan | 2018 | 1.180678 | 1.02524  |
| 13 | Afghanistan | 2019 | 1.191846 | 1.032065 |
| 14 | Albania     | 1990 | 0.80288  | 0.611067 |
| 15 | Albania     | 1991 | 0.824545 | 0.633067 |
| 16 | Albania     | 1992 | 0.847876 | 0.64608  |
| 17 | Albania     | 1993 | 0.8389   | 0.634173 |
| 18 | Albania     | 1994 | 0.851827 | 0.63936  |
| 19 | Albania     | 1995 | 0.863218 | 0.645539 |
| 20 | Albania     | 1996 | 0.835124 | 0.620725 |
| 21 | Albania     | 1997 | 0.820214 | 0.614118 |
| 22 | Albania     | 1998 | 0.796342 | 0.603217 |
| 23 | Albania     | 1999 | 0.836725 | 0.632571 |
| 24 | Albania     | 2000 | 0.801031 | 0.607676 |
| 25 | Albania     | 2001 | 0.800875 | 0.612752 |
| 26 | Albania     | 2002 | 0.818988 | 0.631664 |
| 27 | Albania     | 2003 | 0.829379 | 0.645643 |
| 28 | Albania     | 2004 | 0.814148 | 0.640171 |
| 29 | Albania     | 2005 | 0.844958 | 0.66871  |
| 30 |             |      |          |          |
| 31 |             |      |          |          |
| 32 |             |      |          |          |
| 33 |             |      |          |          |
| 34 |             |      |          |          |
| 35 |             |      |          |          |
| 36 |             |      |          |          |
| 37 |             |      |          |          |
| 38 |             |      |          |          |
| 39 |             |      |          |          |
| 40 |             |      |          |          |
| 41 |             |      |          |          |
| 42 |             |      |          |          |
| 43 |             |      |          |          |
| 44 |             |      |          |          |
| 45 |             |      |          |          |
| 46 |             |      |          |          |



1  
2  
3  
4  
5  
6  
7  
8  
9  
10  
11  
12  
13  
14  
15  
16  
17  
18  
19  
20  
21  
22  
23  
24  
25  
26  
27  
28  
29  
30  
31  
32  
33  
34  
35  
36  
37  
38  
39  
40  
41  
42  
43  
44  
45  
46

|         |      |          |          |
|---------|------|----------|----------|
| Albania | 2006 | 0.861627 | 0.685951 |
| Albania | 2007 | 0.878193 | 0.701901 |
| Albania | 2008 | 0.873395 | 0.701159 |
| Albania | 2009 | 0.851996 | 0.687584 |
| Albania | 2010 | 0.836195 | 0.676588 |
| Albania | 2011 | 0.829811 | 0.676367 |
| Albania | 2012 | 0.835089 | 0.683686 |
| Albania | 2013 | 0.835903 | 0.687582 |
| Albania | 2014 | 0.819922 | 0.678315 |
| Albania | 2015 | 0.807743 | 0.670891 |
| Albania | 2016 | 0.816522 | 0.677372 |
| Albania | 2017 | 0.824754 | 0.682594 |
| Albania | 2018 | 0.833083 | 0.687361 |
| Albania | 2019 | 0.84051  | 0.691033 |
| Algeria | 1990 | 1.109457 | 1.137995 |
| Algeria | 1991 | 1.109573 | 1.103907 |
| Algeria | 1992 | 1.104276 | 1.086803 |
| Algeria | 1993 | 1.099944 | 1.074033 |
| Algeria | 1994 | 1.107022 | 1.066426 |
| Algeria | 1995 | 1.109373 | 1.065159 |
| Algeria | 1996 | 1.112722 | 1.065549 |
| Algeria | 1997 | 1.105399 | 1.055999 |
| Algeria | 1998 | 1.093316 | 1.043813 |
| Algeria | 1999 | 1.103667 | 1.053381 |
| Algeria | 2000 | 1.110872 | 1.065961 |

|                |      |          |          |
|----------------|------|----------|----------|
| Algeria        | 2001 | 1.113195 | 1.075515 |
| Algeria        | 2002 | 1.11772  | 1.088375 |
| Algeria        | 2003 | 1.119067 | 1.111271 |
| Algeria        | 2004 | 1.136506 | 1.142565 |
| Algeria        | 2005 | 1.14715  | 1.169811 |
| Algeria        | 2006 | 1.15201  | 1.190973 |
| Algeria        | 2007 | 1.155168 | 1.209171 |
| Algeria        | 2008 | 1.15859  | 1.228457 |
| Algeria        | 2009 | 1.163619 | 1.248209 |
| Algeria        | 2010 | 1.177218 | 1.286784 |
| Algeria        | 2011 | 1.186641 | 1.312148 |
| Algeria        | 2012 | 1.189601 | 1.324703 |
| Algeria        | 2013 | 1.204505 | 1.349103 |
| Algeria        | 2014 | 1.219508 | 1.372427 |
| Algeria        | 2015 | 1.223912 | 1.38569  |
| Algeria        | 2016 | 1.212958 | 1.379575 |
| Algeria        | 2017 | 1.211995 | 1.380939 |
| Algeria        | 2018 | 1.241531 | 1.414697 |
| Algeria        | 2019 | 1.249033 | 1.426351 |
| American Samoa | 1990 | 0.612611 | 0.596702 |
| American Samoa | 1991 | 0.61697  | 0.598437 |
| American Samoa | 1992 | 0.631844 | 0.608174 |
| American Samoa | 1993 | 0.653989 | 0.623514 |
| American Samoa | 1994 | 0.681528 | 0.645433 |
| American Samoa | 1995 | 0.704734 | 0.662102 |

1  
2  
3  
4  
5  
6  
7  
8  
9  
10  
11  
12  
13  
14  
15  
16  
17  
18  
19  
20  
21  
22  
23  
24  
25  
26  
27  
28  
29  
30  
31  
32  
33  
34  
35  
36  
37  
38  
39  
40  
41  
42  
43  
44  
45  
46

|                |      |          |          |
|----------------|------|----------|----------|
| American Samoa | 1996 | 0.730556 | 0.680042 |
| American Samoa | 1997 | 0.750686 | 0.692616 |
| American Samoa | 1998 | 0.768062 | 0.702708 |
| American Samoa | 1999 | 0.803672 | 0.728942 |
| American Samoa | 2000 | 0.82894  | 0.746903 |
| American Samoa | 2001 | 0.858097 | 0.770038 |
| American Samoa | 2002 | 0.853244 | 0.762156 |
| American Samoa | 2003 | 0.879136 | 0.781717 |
| American Samoa | 2004 | 0.893409 | 0.791329 |
| American Samoa | 2005 | 0.864685 | 0.762067 |
| American Samoa | 2006 | 0.856831 | 0.751596 |
| American Samoa | 2007 | 0.840159 | 0.734654 |
| American Samoa | 2008 | 0.82017  | 0.71572  |
| American Samoa | 2009 | 0.807269 | 0.703181 |
| American Samoa | 2010 | 0.797999 | 0.692814 |
| American Samoa | 2011 | 0.806261 | 0.69851  |
| American Samoa | 2012 | 0.825197 | 0.714836 |
| American Samoa | 2013 | 0.829821 | 0.719759 |
| American Samoa | 2014 | 0.829493 | 0.720731 |
| American Samoa | 2015 | 0.835253 | 0.726995 |
| American Samoa | 2016 | 0.834591 | 0.726271 |
| American Samoa | 2017 | 0.83428  | 0.726919 |
| American Samoa | 2018 | 0.833313 | 0.727019 |
| American Samoa | 2019 | 0.832801 | 0.72741  |
| Andorra        | 1990 | 0.788861 | 0.729791 |

|    |         |      |          |          |
|----|---------|------|----------|----------|
| 1  |         |      |          |          |
| 2  |         |      |          |          |
| 3  |         |      |          |          |
| 4  |         |      |          |          |
| 5  | Andorra | 1991 | 0.777657 | 0.721833 |
| 6  | Andorra | 1992 | 0.786613 | 0.72433  |
| 7  | Andorra | 1993 | 0.799267 | 0.736144 |
| 8  | Andorra | 1994 | 0.822512 | 0.748494 |
| 9  | Andorra | 1995 | 0.815241 | 0.73957  |
| 10 | Andorra | 1996 | 0.812205 | 0.734919 |
| 11 | Andorra | 1997 | 0.819344 | 0.731837 |
| 12 | Andorra | 1998 | 0.822769 | 0.728802 |
| 13 | Andorra | 1999 | 0.83361  | 0.726268 |
| 14 | Andorra | 2000 | 0.838352 | 0.725112 |
| 15 | Andorra | 2001 | 0.84257  | 0.723152 |
| 16 | Andorra | 2002 | 0.857376 | 0.721192 |
| 17 | Andorra | 2003 | 0.855856 | 0.717126 |
| 18 | Andorra | 2004 | 0.880115 | 0.725276 |
| 19 | Andorra | 2005 | 0.88978  | 0.727032 |
| 20 | Andorra | 2006 | 0.905426 | 0.732969 |
| 21 | Andorra | 2007 | 0.920575 | 0.73044  |
| 22 | Andorra | 2008 | 0.930871 | 0.739732 |
| 23 | Andorra | 2009 | 0.966364 | 0.755799 |
| 24 | Andorra | 2010 | 0.984365 | 0.766113 |
| 25 | Andorra | 2011 | 1.019081 | 0.772799 |
| 26 | Andorra | 2012 | 1.070344 | 0.791319 |
| 27 | Andorra | 2013 | 1.089581 | 0.811453 |
| 28 | Andorra | 2014 | 1.126724 | 0.832771 |
| 29 | Andorra | 2015 | 1.162229 | 0.859118 |
| 30 |         |      |          |          |
| 31 |         |      |          |          |
| 32 |         |      |          |          |
| 33 |         |      |          |          |
| 34 |         |      |          |          |
| 35 |         |      |          |          |
| 36 |         |      |          |          |
| 37 |         |      |          |          |
| 38 |         |      |          |          |
| 39 |         |      |          |          |
| 40 |         |      |          |          |
| 41 |         |      |          |          |
| 42 |         |      |          |          |
| 43 |         |      |          |          |
| 44 |         |      |          |          |
| 45 |         |      |          |          |
| 46 |         |      |          |          |

|    |         |      |          |          |
|----|---------|------|----------|----------|
| 1  |         |      |          |          |
| 2  |         |      |          |          |
| 3  |         |      |          |          |
| 4  |         |      |          |          |
| 5  | Andorra | 2016 | 1.164998 | 0.860014 |
| 6  | Andorra | 2017 | 1.180541 | 0.862883 |
| 7  | Andorra | 2018 | 1.169541 | 0.866757 |
| 8  | Andorra | 2019 | 1.178874 | 0.871085 |
| 9  |         |      |          |          |
| 10 | Angola  | 1990 | 0.537106 | 0.457811 |
| 11 | Angola  | 1991 | 0.544217 | 0.460671 |
| 12 | Angola  | 1992 | 0.551135 | 0.46428  |
| 13 | Angola  | 1993 | 0.559343 | 0.468348 |
| 14 | Angola  | 1994 | 0.567008 | 0.47207  |
| 15 | Angola  | 1995 | 0.57392  | 0.474355 |
| 16 | Angola  | 1996 | 0.582053 | 0.476191 |
| 17 | Angola  | 1997 | 0.592023 | 0.480883 |
| 18 | Angola  | 1998 | 0.602272 | 0.487081 |
| 19 | Angola  | 1999 | 0.616042 | 0.494658 |
| 20 | Angola  | 2000 | 0.625475 | 0.49915  |
| 21 | Angola  | 2001 | 0.625067 | 0.497084 |
| 22 | Angola  | 2002 | 0.651311 | 0.513815 |
| 23 | Angola  | 2003 | 0.668571 | 0.527179 |
| 24 | Angola  | 2004 | 0.671047 | 0.528362 |
| 25 | Angola  | 2005 | 0.66996  | 0.528374 |
| 26 | Angola  | 2006 | 0.653598 | 0.518225 |
| 27 | Angola  | 2007 | 0.639537 | 0.508693 |
| 28 | Angola  | 2008 | 0.641562 | 0.510323 |
| 29 | Angola  | 2009 | 0.636395 | 0.509296 |
| 30 | Angola  | 2010 | 0.633737 | 0.507852 |
| 31 |         |      |          |          |
| 32 |         |      |          |          |
| 33 |         |      |          |          |
| 34 |         |      |          |          |
| 35 |         |      |          |          |
| 36 |         |      |          |          |
| 37 |         |      |          |          |
| 38 |         |      |          |          |
| 39 |         |      |          |          |
| 40 |         |      |          |          |
| 41 |         |      |          |          |
| 42 |         |      |          |          |
| 43 |         |      |          |          |
| 44 |         |      |          |          |
| 45 |         |      |          |          |
| 46 |         |      |          |          |

|                     |      |          |          |
|---------------------|------|----------|----------|
| Angola              | 2011 | 0.627955 | 0.505033 |
| Angola              | 2012 | 0.619494 | 0.500108 |
| Angola              | 2013 | 0.615684 | 0.497491 |
| Angola              | 2014 | 0.611861 | 0.494839 |
| Angola              | 2015 | 0.618424 | 0.500956 |
| Angola              | 2016 | 0.629456 | 0.509579 |
| Angola              | 2017 | 0.635562 | 0.517839 |
| Angola              | 2018 | 0.641232 | 0.523674 |
| Angola              | 2019 | 0.647501 | 0.530396 |
| Antigua and Barbuda | 1990 | 0.666514 | 0.446543 |
| Antigua and Barbuda | 1991 | 0.715685 | 0.478107 |
| Antigua and Barbuda | 1992 | 0.714282 | 0.479608 |
| Antigua and Barbuda | 1993 | 0.732266 | 0.493697 |
| Antigua and Barbuda | 1994 | 0.736436 | 0.499464 |
| Antigua and Barbuda | 1995 | 0.737658 | 0.502559 |
| Antigua and Barbuda | 1996 | 0.834084 | 0.578888 |
| Antigua and Barbuda | 1997 | 0.849233 | 0.599587 |
| Antigua and Barbuda | 1998 | 0.856383 | 0.615655 |
| Antigua and Barbuda | 1999 | 0.86549  | 0.631337 |
| Antigua and Barbuda | 2000 | 0.88497  | 0.654818 |
| Antigua and Barbuda | 2001 | 0.922952 | 0.693046 |
| Antigua and Barbuda | 2002 | 0.937509 | 0.716928 |
| Antigua and Barbuda | 2003 | 0.931884 | 0.725553 |
| Antigua and Barbuda | 2004 | 0.928461 | 0.73322  |
| Antigua and Barbuda | 2005 | 0.915143 | 0.734142 |

|    |                     |      |          |          |
|----|---------------------|------|----------|----------|
| 1  |                     |      |          |          |
| 2  |                     |      |          |          |
| 3  |                     |      |          |          |
| 4  |                     |      |          |          |
| 5  | Antigua and Barbuda | 2006 | 0.886643 | 0.717462 |
| 6  | Antigua and Barbuda | 2007 | 0.737094 | 0.586594 |
| 7  | Antigua and Barbuda | 2008 | 0.740284 | 0.585623 |
| 8  | Antigua and Barbuda | 2009 | 0.834307 | 0.66124  |
| 9  | Antigua and Barbuda | 2010 | 0.855069 | 0.67682  |
| 10 | Antigua and Barbuda | 2011 | 0.878277 | 0.69395  |
| 11 | Antigua and Barbuda | 2012 | 0.910791 | 0.720486 |
| 12 | Antigua and Barbuda | 2013 | 0.946769 | 0.754748 |
| 13 | Antigua and Barbuda | 2014 | 0.946533 | 0.756041 |
| 14 | Antigua and Barbuda | 2015 | 0.944465 | 0.754486 |
| 15 | Antigua and Barbuda | 2016 | 0.949086 | 0.759164 |
| 16 | Antigua and Barbuda | 2017 | 0.961636 | 0.775668 |
| 17 | Antigua and Barbuda | 2018 | 0.955232 | 0.775363 |
| 18 | Antigua and Barbuda | 2019 | 0.938257 | 0.764103 |
| 19 | Argentina           | 1990 | 0.816301 | 0.592396 |
| 20 | Argentina           | 1991 | 0.81505  | 0.589561 |
| 21 | Argentina           | 1992 | 0.809108 | 0.582187 |
| 22 | Argentina           | 1993 | 0.820178 | 0.585302 |
| 23 | Argentina           | 1994 | 0.835615 | 0.593134 |
| 24 | Argentina           | 1995 | 0.852727 | 0.599872 |
| 25 | Argentina           | 1996 | 0.864933 | 0.604446 |
| 26 | Argentina           | 1997 | 0.887958 | 0.615809 |
| 27 | Argentina           | 1998 | 0.911821 | 0.626255 |
| 28 | Argentina           | 1999 | 0.926667 | 0.630847 |
| 29 | Argentina           | 2000 | 0.937797 | 0.633938 |
| 30 |                     |      |          |          |
| 31 |                     |      |          |          |
| 32 |                     |      |          |          |
| 33 |                     |      |          |          |
| 34 |                     |      |          |          |
| 35 |                     |      |          |          |
| 36 |                     |      |          |          |
| 37 |                     |      |          |          |
| 38 |                     |      |          |          |
| 39 |                     |      |          |          |
| 40 |                     |      |          |          |
| 41 |                     |      |          |          |
| 42 |                     |      |          |          |
| 43 |                     |      |          |          |
| 44 |                     |      |          |          |
| 45 |                     |      |          |          |
| 46 |                     |      |          |          |

|    |           |      |          |          |
|----|-----------|------|----------|----------|
| 1  |           |      |          |          |
| 2  |           |      |          |          |
| 3  |           |      |          |          |
| 4  |           |      |          |          |
| 5  | Argentina | 2001 | 0.936522 | 0.629952 |
| 6  | Argentina | 2002 | 0.926919 | 0.620389 |
| 7  | Argentina | 2003 | 0.93253  | 0.619629 |
| 8  | Argentina | 2004 | 0.932059 | 0.61577  |
| 9  | Argentina | 2005 | 0.927467 | 0.611552 |
| 10 | Argentina | 2006 | 0.939197 | 0.617824 |
| 11 | Argentina | 2007 | 0.941492 | 0.617118 |
| 12 | Argentina | 2008 | 0.95441  | 0.62448  |
| 13 | Argentina | 2009 | 0.959719 | 0.625646 |
| 14 | Argentina | 2010 | 0.973276 | 0.629635 |
| 15 | Argentina | 2011 | 0.975477 | 0.628524 |
| 16 | Argentina | 2012 | 0.967782 | 0.622803 |
| 17 | Argentina | 2013 | 0.976495 | 0.626864 |
| 18 | Argentina | 2014 | 0.98453  | 0.630903 |
| 19 | Argentina | 2015 | 0.977509 | 0.626764 |
| 20 | Argentina | 2016 | 0.966372 | 0.620702 |
| 21 | Argentina | 2017 | 0.958121 | 0.617106 |
| 22 | Argentina | 2018 | 0.958598 | 0.622691 |
| 23 | Argentina | 2019 | 0.954191 | 0.623212 |
| 24 | Armenia   | 1990 | 0.780068 | 0.518728 |
| 25 | Armenia   | 1991 | 0.765191 | 0.508548 |
| 26 | Armenia   | 1992 | 0.777493 | 0.518524 |
| 27 | Armenia   | 1993 | 0.769502 | 0.514966 |
| 28 | Armenia   | 1994 | 0.767158 | 0.520619 |
| 29 | Armenia   | 1995 | 0.837447 | 0.570209 |
| 30 |           |      |          |          |
| 31 |           |      |          |          |
| 32 |           |      |          |          |
| 33 |           |      |          |          |
| 34 |           |      |          |          |
| 35 |           |      |          |          |
| 36 |           |      |          |          |
| 37 |           |      |          |          |
| 38 |           |      |          |          |
| 39 |           |      |          |          |
| 40 |           |      |          |          |
| 41 |           |      |          |          |
| 42 |           |      |          |          |
| 43 |           |      |          |          |
| 44 |           |      |          |          |
| 45 |           |      |          |          |
| 46 |           |      |          |          |



|           |      |          |          |
|-----------|------|----------|----------|
| Armenia   | 1996 | 0.883948 | 0.61161  |
| Armenia   | 1997 | 0.932501 | 0.658905 |
| Armenia   | 1998 | 0.992186 | 0.709891 |
| Armenia   | 1999 | 0.977642 | 0.704145 |
| Armenia   | 2000 | 0.989377 | 0.713448 |
| Armenia   | 2001 | 0.993407 | 0.722184 |
| Armenia   | 2002 | 0.975439 | 0.707534 |
| Armenia   | 2003 | 0.984779 | 0.705606 |
| Armenia   | 2004 | 0.973642 | 0.687817 |
| Armenia   | 2005 | 0.955851 | 0.670541 |
| Armenia   | 2006 | 0.928028 | 0.650275 |
| Armenia   | 2007 | 1.000884 | 0.697835 |
| Armenia   | 2008 | 0.930024 | 0.654575 |
| Armenia   | 2009 | 0.907739 | 0.639381 |
| Armenia   | 2010 | 0.891967 | 0.618215 |
| Armenia   | 2011 | 0.858252 | 0.593996 |
| Armenia   | 2012 | 0.895746 | 0.620641 |
| Armenia   | 2013 | 0.90243  | 0.62339  |
| Armenia   | 2014 | 0.879924 | 0.604729 |
| Armenia   | 2015 | 0.827098 | 0.568261 |
| Armenia   | 2016 | 0.836569 | 0.574202 |
| Armenia   | 2017 | 0.838073 | 0.573061 |
| Armenia   | 2018 | 0.837492 | 0.569781 |
| Armenia   | 2019 | 0.833053 | 0.566864 |
| Australia | 1990 | 1.294494 | 0.755478 |

|           |      |          |          |
|-----------|------|----------|----------|
| Australia | 1991 | 1.288997 | 0.756474 |
| Australia | 1992 | 1.268926 | 0.745579 |
| Australia | 1993 | 1.241153 | 0.728202 |
| Australia | 1994 | 1.226829 | 0.71809  |
| Australia | 1995 | 1.231699 | 0.722381 |
| Australia | 1996 | 1.205226 | 0.709841 |
| Australia | 1997 | 1.191066 | 0.708118 |
| Australia | 1998 | 1.152601 | 0.688628 |
| Australia | 1999 | 1.152189 | 0.689831 |
| Australia | 2000 | 1.138176 | 0.683865 |
| Australia | 2001 | 1.12561  | 0.679441 |
| Australia | 2002 | 1.117703 | 0.674985 |
| Australia | 2003 | 1.095849 | 0.664528 |
| Australia | 2004 | 1.115103 | 0.677657 |
| Australia | 2005 | 1.135883 | 0.692902 |
| Australia | 2006 | 1.143659 | 0.700868 |
| Australia | 2007 | 1.154737 | 0.713041 |
| Australia | 2008 | 1.155029 | 0.717956 |
| Australia | 2009 | 1.164055 | 0.73019  |
| Australia | 2010 | 1.152713 | 0.728706 |
| Australia | 2011 | 1.141979 | 0.729099 |
| Australia | 2012 | 1.137162 | 0.734577 |
| Australia | 2013 | 1.125903 | 0.736751 |
| Australia | 2014 | 1.120436 | 0.740431 |
| Australia | 2015 | 1.10876  | 0.740356 |

1  
2  
3  
4  
5  
6  
7  
8  
9  
10  
11  
12  
13  
14  
15  
16  
17  
18  
19  
20  
21  
22  
23  
24  
25  
26  
27  
28  
29  
30  
31  
32  
33  
34  
35  
36  
37  
38  
39  
40  
41  
42  
43  
44  
45  
46

|           |      |          |          |
|-----------|------|----------|----------|
| Australia | 2016 | 1.102751 | 0.742331 |
| Australia | 2017 | 1.080546 | 0.734664 |
| Australia | 2018 | 1.068638 | 0.734484 |
| Australia | 2019 | 1.053569 | 0.730815 |
| Austria   | 1990 | 1.516235 | 0.715717 |
| Austria   | 1991 | 1.500515 | 0.705711 |
| Austria   | 1992 | 1.491132 | 0.697389 |
| Austria   | 1993 | 1.491922 | 0.696126 |
| Austria   | 1994 | 1.498083 | 0.695299 |
| Austria   | 1995 | 1.517538 | 0.698785 |
| Austria   | 1996 | 1.50472  | 0.689712 |
| Austria   | 1997 | 1.501237 | 0.682791 |
| Austria   | 1998 | 1.494367 | 0.680545 |
| Austria   | 1999 | 1.525297 | 0.695688 |
| Austria   | 2000 | 1.552982 | 0.710282 |
| Austria   | 2001 | 1.556454 | 0.717181 |
| Austria   | 2002 | 1.552057 | 0.722238 |
| Austria   | 2003 | 1.575332 | 0.743031 |
| Austria   | 2004 | 1.543781 | 0.734121 |
| Austria   | 2005 | 1.566323 | 0.744065 |
| Austria   | 2006 | 1.565154 | 0.746048 |
| Austria   | 2007 | 1.574945 | 0.754747 |
| Austria   | 2008 | 1.579287 | 0.761531 |
| Austria   | 2009 | 1.5496   | 0.756153 |
| Austria   | 2010 | 1.565489 | 0.765797 |

|            |      |          |          |
|------------|------|----------|----------|
| Austria    | 2011 | 1.588252 | 0.779744 |
| Austria    | 2012 | 1.601134 | 0.789644 |
| Austria    | 2013 | 1.61478  | 0.803998 |
| Austria    | 2014 | 1.618171 | 0.816704 |
| Austria    | 2015 | 1.585412 | 0.805686 |
| Austria    | 2016 | 1.587994 | 0.814803 |
| Austria    | 2017 | 1.567843 | 0.81588  |
| Austria    | 2018 | 1.545369 | 0.82056  |
| Austria    | 2019 | 1.510565 | 0.817641 |
| Azerbaijan | 1990 | 0.884919 | 0.65096  |
| Azerbaijan | 1991 | 0.863564 | 0.647523 |
| Azerbaijan | 1992 | 0.804415 | 0.631196 |
| Azerbaijan | 1993 | 0.807115 | 0.640708 |
| Azerbaijan | 1994 | 0.824097 | 0.657869 |
| Azerbaijan | 1995 | 0.899597 | 0.689805 |
| Azerbaijan | 1996 | 0.926688 | 0.699384 |
| Azerbaijan | 1997 | 0.933708 | 0.708992 |
| Azerbaijan | 1998 | 0.951881 | 0.72596  |
| Azerbaijan | 1999 | 0.959192 | 0.7351   |
| Azerbaijan | 2000 | 0.953873 | 0.735509 |
| Azerbaijan | 2001 | 0.94505  | 0.732781 |
| Azerbaijan | 2002 | 0.929063 | 0.726587 |
| Azerbaijan | 2003 | 0.922196 | 0.729547 |
| Azerbaijan | 2004 | 0.911869 | 0.736815 |
| Azerbaijan | 2005 | 0.903185 | 0.741571 |

1  
2  
3  
4  
5  
6  
7  
8  
9  
10  
11  
12  
13  
14  
15  
16  
17  
18  
19  
20  
21  
22  
23  
24  
25  
26  
27  
28  
29  
30  
31  
32  
33  
34  
35  
36  
37  
38  
39  
40  
41  
42  
43  
44  
45  
46

|            |      |          |          |
|------------|------|----------|----------|
| Azerbaijan | 2006 | 0.897948 | 0.739822 |
| Azerbaijan | 2007 | 0.893294 | 0.736339 |
| Azerbaijan | 2008 | 0.88655  | 0.739216 |
| Azerbaijan | 2009 | 0.895969 | 0.749957 |
| Azerbaijan | 2010 | 0.897182 | 0.756723 |
| Azerbaijan | 2011 | 0.886579 | 0.749297 |
| Azerbaijan | 2012 | 0.889392 | 0.748078 |
| Azerbaijan | 2013 | 0.896214 | 0.759684 |
| Azerbaijan | 2014 | 0.915751 | 0.771163 |
| Azerbaijan | 2015 | 0.928454 | 0.781904 |
| Azerbaijan | 2016 | 0.941756 | 0.786452 |
| Azerbaijan | 2017 | 0.948794 | 0.792003 |
| Azerbaijan | 2018 | 0.959219 | 0.807247 |
| Azerbaijan | 2019 | 0.964069 | 0.81359  |
| Bahamas    | 1990 | 0.86923  | 0.637024 |
| Bahamas    | 1991 | 0.873246 | 0.641249 |
| Bahamas    | 1992 | 0.886863 | 0.654543 |
| Bahamas    | 1993 | 0.874838 | 0.651853 |
| Bahamas    | 1994 | 0.865065 | 0.646329 |
| Bahamas    | 1995 | 0.858317 | 0.644723 |
| Bahamas    | 1996 | 0.882475 | 0.662296 |
| Bahamas    | 1997 | 0.890227 | 0.668356 |
| Bahamas    | 1998 | 0.896911 | 0.667434 |
| Bahamas    | 1999 | 0.913152 | 0.670192 |
| Bahamas    | 2000 | 0.946792 | 0.688855 |

|         |      |          |          |
|---------|------|----------|----------|
| Bahamas | 2001 | 0.933287 | 0.683256 |
| Bahamas | 2002 | 0.961431 | 0.708425 |
| Bahamas | 2003 | 0.980276 | 0.723078 |
| Bahamas | 2004 | 0.969473 | 0.729096 |
| Bahamas | 2005 | 0.976416 | 0.747939 |
| Bahamas | 2006 | 0.965569 | 0.746845 |
| Bahamas | 2007 | 0.959604 | 0.750593 |
| Bahamas | 2008 | 0.937636 | 0.735607 |
| Bahamas | 2009 | 0.95849  | 0.756095 |
| Bahamas | 2010 | 0.962004 | 0.755122 |
| Bahamas | 2011 | 0.94786  | 0.745734 |
| Bahamas | 2012 | 0.940035 | 0.743227 |
| Bahamas | 2013 | 0.993174 | 0.800607 |
| Bahamas | 2014 | 0.966604 | 0.786467 |
| Bahamas | 2015 | 0.93935  | 0.758471 |
| Bahamas | 2016 | 0.934359 | 0.754261 |
| Bahamas | 2017 | 0.929223 | 0.75145  |
| Bahamas | 2018 | 0.912342 | 0.733095 |
| Bahamas | 2019 | 0.901126 | 0.718165 |
| Bahrain | 1990 | 0.96846  | 1.011246 |
| Bahrain | 1991 | 0.955936 | 0.993367 |
| Bahrain | 1992 | 0.958204 | 1.008735 |
| Bahrain | 1993 | 0.960542 | 1.032361 |
| Bahrain | 1994 | 0.914769 | 0.98154  |
| Bahrain | 1995 | 0.867259 | 0.918159 |

|            |      |          |          |
|------------|------|----------|----------|
| Bahrain    | 1996 | 0.880086 | 0.927939 |
| Bahrain    | 1997 | 0.841479 | 0.867421 |
| Bahrain    | 1998 | 0.897658 | 0.909906 |
| Bahrain    | 1999 | 0.990692 | 1.012986 |
| Bahrain    | 2000 | 0.997978 | 1.079099 |
| Bahrain    | 2001 | 0.962072 | 1.099497 |
| Bahrain    | 2002 | 0.944778 | 1.025992 |
| Bahrain    | 2003 | 0.88681  | 0.932096 |
| Bahrain    | 2004 | 0.893684 | 0.94323  |
| Bahrain    | 2005 | 0.879997 | 0.951966 |
| Bahrain    | 2006 | 0.845168 | 0.936137 |
| Bahrain    | 2007 | 0.816137 | 0.921743 |
| Bahrain    | 2008 | 0.771081 | 0.894059 |
| Bahrain    | 2009 | 0.739982 | 0.877059 |
| Bahrain    | 2010 | 0.703531 | 0.858101 |
| Bahrain    | 2011 | 0.690148 | 0.841018 |
| Bahrain    | 2012 | 0.696111 | 0.81503  |
| Bahrain    | 2013 | 0.724384 | 0.856791 |
| Bahrain    | 2014 | 0.754134 | 0.915374 |
| Bahrain    | 2015 | 0.761763 | 0.942064 |
| Bahrain    | 2016 | 0.781626 | 0.985433 |
| Bahrain    | 2017 | 0.787411 | 1.010453 |
| Bahrain    | 2018 | 0.761454 | 0.999448 |
| Bahrain    | 2019 | 0.75058  | 1.006894 |
| Bangladesh | 1990 | 0.3804   | 0.716382 |

|            |      |          |          |
|------------|------|----------|----------|
| Bangladesh | 1991 | 0.375512 | 0.70697  |
| Bangladesh | 1992 | 0.395376 | 0.732929 |
| Bangladesh | 1993 | 0.404917 | 0.739799 |
| Bangladesh | 1994 | 0.4091   | 0.741698 |
| Bangladesh | 1995 | 0.419216 | 0.749634 |
| Bangladesh | 1996 | 0.415382 | 0.737888 |
| Bangladesh | 1997 | 0.41797  | 0.73412  |
| Bangladesh | 1998 | 0.43435  | 0.780599 |
| Bangladesh | 1999 | 0.454088 | 0.839102 |
| Bangladesh | 2000 | 0.453657 | 0.843641 |
| Bangladesh | 2001 | 0.459795 | 0.853859 |
| Bangladesh | 2002 | 0.467849 | 0.862316 |
| Bangladesh | 2003 | 0.464491 | 0.839155 |
| Bangladesh | 2004 | 0.462154 | 0.815733 |
| Bangladesh | 2005 | 0.466528 | 0.798544 |
| Bangladesh | 2006 | 0.46469  | 0.773923 |
| Bangladesh | 2007 | 0.454664 | 0.734806 |
| Bangladesh | 2008 | 0.464322 | 0.733483 |
| Bangladesh | 2009 | 0.490683 | 0.758337 |
| Bangladesh | 2010 | 0.52175  | 0.778736 |
| Bangladesh | 2011 | 0.542118 | 0.797312 |
| Bangladesh | 2012 | 0.565715 | 0.822096 |
| Bangladesh | 2013 | 0.586354 | 0.836184 |
| Bangladesh | 2014 | 0.60748  | 0.848881 |
| Bangladesh | 2015 | 0.637512 | 0.868537 |



1  
2  
3  
4  
5  
6  
7  
8  
9  
10  
11  
12  
13  
14  
15  
16  
17  
18  
19  
20  
21  
22  
23  
24  
25  
26  
27  
28  
29  
30  
31  
32  
33  
34  
35  
36  
37  
38  
39  
40  
41  
42  
43  
44  
45  
46

|            |      |          |          |
|------------|------|----------|----------|
| Bangladesh | 2016 | 0.660278 | 0.882671 |
| Bangladesh | 2017 | 0.678338 | 0.88952  |
| Bangladesh | 2018 | 0.698971 | 0.899008 |
| Bangladesh | 2019 | 0.718894 | 0.907048 |
| Barbados   | 1990 | 0.894527 | 0.616642 |
| Barbados   | 1991 | 0.905157 | 0.626068 |
| Barbados   | 1992 | 0.886093 | 0.614058 |
| Barbados   | 1993 | 0.840365 | 0.584046 |
| Barbados   | 1994 | 0.798121 | 0.552412 |
| Barbados   | 1995 | 0.797847 | 0.547842 |
| Barbados   | 1996 | 0.802923 | 0.548148 |
| Barbados   | 1997 | 0.829481 | 0.563764 |
| Barbados   | 1998 | 0.91285  | 0.619466 |
| Barbados   | 1999 | 1.051021 | 0.713134 |
| Barbados   | 2000 | 1.129813 | 0.771219 |
| Barbados   | 2001 | 1.164329 | 0.804694 |
| Barbados   | 2002 | 1.098412 | 0.766947 |
| Barbados   | 2003 | 1.060014 | 0.743981 |
| Barbados   | 2004 | 1.049906 | 0.73631  |
| Barbados   | 2005 | 1.035049 | 0.730984 |
| Barbados   | 2006 | 1.025381 | 0.726048 |
| Barbados   | 2007 | 1.03494  | 0.730463 |
| Barbados   | 2008 | 1.071119 | 0.755906 |
| Barbados   | 2009 | 1.186422 | 0.840113 |
| Barbados   | 2010 | 1.20559  | 0.861409 |

|    |          |      |          |          |
|----|----------|------|----------|----------|
| 1  |          |      |          |          |
| 2  |          |      |          |          |
| 3  |          |      |          |          |
| 4  |          |      |          |          |
| 5  | Barbados | 2011 | 1.256207 | 0.903078 |
| 6  | Barbados | 2012 | 1.232002 | 0.894855 |
| 7  | Barbados | 2013 | 1.244512 | 0.910245 |
| 8  | Barbados | 2014 | 1.226329 | 0.90563  |
| 9  | Barbados | 2015 | 1.219095 | 0.909021 |
| 10 | Barbados | 2016 | 1.20731  | 0.908776 |
| 11 | Barbados | 2017 | 1.18224  | 0.898411 |
| 12 | Barbados | 2018 | 1.136632 | 0.87408  |
| 13 | Barbados | 2019 | 1.057898 | 0.823784 |
| 14 | Barbados | 2019 | 1.057898 | 0.823784 |
| 15 | Belarus  | 1990 | 1.222737 | 0.546785 |
| 16 | Belarus  | 1991 | 1.222589 | 0.542306 |
| 17 | Belarus  | 1992 | 1.222354 | 0.541995 |
| 18 | Belarus  | 1993 | 1.194195 | 0.528192 |
| 19 | Belarus  | 1994 | 1.198027 | 0.525786 |
| 20 | Belarus  | 1995 | 1.190682 | 0.524236 |
| 21 | Belarus  | 1996 | 1.19779  | 0.529672 |
| 22 | Belarus  | 1997 | 1.201862 | 0.530403 |
| 23 | Belarus  | 1998 | 1.180566 | 0.522256 |
| 24 | Belarus  | 1999 | 1.17349  | 0.525554 |
| 25 | Belarus  | 2000 | 1.181038 | 0.537008 |
| 26 | Belarus  | 2001 | 1.11243  | 0.527535 |
| 27 | Belarus  | 2002 | 0.992516 | 0.514932 |
| 28 | Belarus  | 2003 | 0.965662 | 0.512927 |
| 29 | Belarus  | 2004 | 0.987739 | 0.51748  |
| 30 | Belarus  | 2005 | 0.949344 | 0.490265 |
| 31 |          |      |          |          |
| 32 |          |      |          |          |
| 33 |          |      |          |          |
| 34 |          |      |          |          |
| 35 |          |      |          |          |
| 36 |          |      |          |          |
| 37 |          |      |          |          |
| 38 |          |      |          |          |
| 39 |          |      |          |          |
| 40 |          |      |          |          |
| 41 |          |      |          |          |
| 42 |          |      |          |          |
| 43 |          |      |          |          |
| 44 |          |      |          |          |
| 45 |          |      |          |          |
| 46 |          |      |          |          |

1  
2  
3  
4  
5  
6  
7  
8  
9  
10  
11  
12  
13  
14  
15  
16  
17  
18  
19  
20  
21  
22  
23  
24  
25  
26  
27  
28  
29  
30  
31  
32  
33  
34  
35  
36  
37  
38  
39  
40  
41  
42  
43  
44  
45  
46

|         |      |          |          |
|---------|------|----------|----------|
| Belarus | 2006 | 0.967082 | 0.492058 |
| Belarus | 2007 | 1.016222 | 0.523081 |
| Belarus | 2008 | 0.997675 | 0.511675 |
| Belarus | 2009 | 1.034343 | 0.52553  |
| Belarus | 2010 | 1.035253 | 0.522242 |
| Belarus | 2011 | 1.052963 | 0.526143 |
| Belarus | 2012 | 1.118591 | 0.540565 |
| Belarus | 2013 | 1.163733 | 0.552405 |
| Belarus | 2014 | 1.170396 | 0.54707  |
| Belarus | 2015 | 1.17895  | 0.546572 |
| Belarus | 2016 | 1.200354 | 0.553718 |
| Belarus | 2017 | 1.181    | 0.545909 |
| Belarus | 2018 | 1.181577 | 0.547002 |
| Belarus | 2019 | 1.173258 | 0.544368 |
| Belgium | 1990 | 1.421385 | 0.740877 |
| Belgium | 1991 | 1.423942 | 0.735281 |
| Belgium | 1992 | 1.445789 | 0.734188 |
| Belgium | 1993 | 1.462333 | 0.731138 |
| Belgium | 1994 | 1.49978  | 0.74798  |
| Belgium | 1995 | 1.496972 | 0.743446 |
| Belgium | 1996 | 1.496832 | 0.734692 |
| Belgium | 1997 | 1.509634 | 0.737004 |
| Belgium | 1998 | 1.514908 | 0.74002  |
| Belgium | 1999 | 1.502728 | 0.733028 |
| Belgium | 2000 | 1.557667 | 0.760407 |

|    |         |      |          |          |
|----|---------|------|----------|----------|
| 1  |         |      |          |          |
| 2  |         |      |          |          |
| 3  |         |      |          |          |
| 4  |         |      |          |          |
| 5  | Belgium | 2001 | 1.583938 | 0.775911 |
| 6  | Belgium | 2002 | 1.586992 | 0.779042 |
| 7  | Belgium | 2003 | 1.581673 | 0.780405 |
| 8  | Belgium | 2004 | 1.568962 | 0.781184 |
| 9  | Belgium | 2005 | 1.5535   | 0.78059  |
| 10 | Belgium | 2006 | 1.536952 | 0.778674 |
| 11 | Belgium | 2007 | 1.518508 | 0.773984 |
| 12 | Belgium | 2008 | 1.485609 | 0.766927 |
| 13 | Belgium | 2009 | 1.472726 | 0.767742 |
| 14 | Belgium | 2010 | 1.455233 | 0.765906 |
| 15 | Belgium | 2011 | 1.438783 | 0.760722 |
| 16 | Belgium | 2012 | 1.407827 | 0.747317 |
| 17 | Belgium | 2013 | 1.420968 | 0.757718 |
| 18 | Belgium | 2014 | 1.426814 | 0.762059 |
| 19 | Belgium | 2015 | 1.453753 | 0.777867 |
| 20 | Belgium | 2016 | 1.443727 | 0.774551 |
| 21 | Belgium | 2017 | 1.418192 | 0.768017 |
| 22 | Belgium | 2018 | 1.412215 | 0.771966 |
| 23 | Belgium | 2019 | 1.395084 | 0.770581 |
| 24 | Belize  | 1990 | 1.00662  | 0.972825 |
| 25 | Belize  | 1991 | 0.965362 | 0.94683  |
| 26 | Belize  | 1992 | 0.931144 | 0.91186  |
| 27 | Belize  | 1993 | 0.932714 | 0.918929 |
| 28 | Belize  | 1994 | 0.931709 | 0.919944 |
| 29 | Belize  | 1995 | 0.88969  | 0.890978 |
| 30 |         |      |          |          |
| 31 |         |      |          |          |
| 32 |         |      |          |          |
| 33 |         |      |          |          |
| 34 |         |      |          |          |
| 35 |         |      |          |          |
| 36 |         |      |          |          |
| 37 |         |      |          |          |
| 38 |         |      |          |          |
| 39 |         |      |          |          |
| 40 |         |      |          |          |
| 41 |         |      |          |          |
| 42 |         |      |          |          |
| 43 |         |      |          |          |
| 44 |         |      |          |          |
| 45 |         |      |          |          |
| 46 |         |      |          |          |

|    |        |      |          |          |
|----|--------|------|----------|----------|
| 1  |        |      |          |          |
| 2  |        |      |          |          |
| 3  |        |      |          |          |
| 4  |        |      |          |          |
| 5  | Belize | 1996 | 0.867909 | 0.868761 |
| 6  | Belize | 1997 | 0.814316 | 0.808436 |
| 7  | Belize | 1998 | 0.749212 | 0.736919 |
| 8  | Belize | 1999 | 0.714264 | 0.689447 |
| 9  | Belize | 2000 | 0.743064 | 0.711691 |
| 10 | Belize | 2001 | 0.79908  | 0.763506 |
| 11 | Belize | 2002 | 0.851249 | 0.81938  |
| 12 | Belize | 2003 | 0.884077 | 0.854598 |
| 13 | Belize | 2004 | 0.886352 | 0.861362 |
| 14 | Belize | 2005 | 0.904799 | 0.880318 |
| 15 | Belize | 2006 | 0.936253 | 0.920596 |
| 16 | Belize | 2007 | 0.939889 | 0.93118  |
| 17 | Belize | 2008 | 0.921785 | 0.919071 |
| 18 | Belize | 2009 | 0.920857 | 0.923895 |
| 19 | Belize | 2010 | 0.915009 | 0.919982 |
| 20 | Belize | 2011 | 0.925972 | 0.936544 |
| 21 | Belize | 2012 | 0.928028 | 0.938017 |
| 22 | Belize | 2013 | 0.940011 | 0.951449 |
| 23 | Belize | 2014 | 0.926192 | 0.934737 |
| 24 | Belize | 2015 | 0.870335 | 0.87185  |
| 25 | Belize | 2016 | 0.849205 | 0.852208 |
| 26 | Belize | 2017 | 0.845053 | 0.848611 |
| 27 | Belize | 2018 | 0.837958 | 0.836727 |
| 28 | Belize | 2019 | 0.830969 | 0.825455 |
| 29 | Benin  | 1990 | 0.79431  | 0.718407 |
| 30 |        |      |          |          |
| 31 |        |      |          |          |
| 32 |        |      |          |          |
| 33 |        |      |          |          |
| 34 |        |      |          |          |
| 35 |        |      |          |          |
| 36 |        |      |          |          |
| 37 |        |      |          |          |
| 38 |        |      |          |          |
| 39 |        |      |          |          |
| 40 |        |      |          |          |
| 41 |        |      |          |          |
| 42 |        |      |          |          |
| 43 |        |      |          |          |
| 44 |        |      |          |          |
| 45 |        |      |          |          |
| 46 |        |      |          |          |

|       |      |          |          |
|-------|------|----------|----------|
| Benin | 1991 | 0.787919 | 0.71165  |
| Benin | 1992 | 0.789963 | 0.712579 |
| Benin | 1993 | 0.792025 | 0.710205 |
| Benin | 1994 | 0.794905 | 0.70809  |
| Benin | 1995 | 0.79705  | 0.707537 |
| Benin | 1996 | 0.797238 | 0.702469 |
| Benin | 1997 | 0.79723  | 0.69874  |
| Benin | 1998 | 0.792817 | 0.690638 |
| Benin | 1999 | 0.787169 | 0.680281 |
| Benin | 2000 | 0.789476 | 0.67662  |
| Benin | 2001 | 0.791888 | 0.674468 |
| Benin | 2002 | 0.795861 | 0.672453 |
| Benin | 2003 | 0.805334 | 0.676195 |
| Benin | 2004 | 0.820154 | 0.684018 |
| Benin | 2005 | 0.837154 | 0.694794 |
| Benin | 2006 | 0.854647 | 0.70472  |
| Benin | 2007 | 0.870698 | 0.715176 |
| Benin | 2008 | 0.864989 | 0.708258 |
| Benin | 2009 | 0.861007 | 0.704984 |
| Benin | 2010 | 0.856749 | 0.700102 |
| Benin | 2011 | 0.848411 | 0.694153 |
| Benin | 2012 | 0.842619 | 0.6896   |
| Benin | 2013 | 0.831281 | 0.682766 |
| Benin | 2014 | 0.834141 | 0.686071 |
| Benin | 2015 | 0.836716 | 0.687831 |

|         |      |          |          |
|---------|------|----------|----------|
| Benin   | 2016 | 0.841937 | 0.693924 |
| Benin   | 2017 | 0.845774 | 0.698568 |
| Benin   | 2018 | 0.84839  | 0.702366 |
| Benin   | 2019 | 0.84808  | 0.705069 |
| Bermuda | 1990 | 0.754029 | 0.536264 |
| Bermuda | 1991 | 0.779454 | 0.553886 |
| Bermuda | 1992 | 0.840547 | 0.599338 |
| Bermuda | 1993 | 0.854096 | 0.607478 |
| Bermuda | 1994 | 0.872814 | 0.618957 |
| Bermuda | 1995 | 0.898129 | 0.634928 |
| Bermuda | 1996 | 0.888039 | 0.626096 |
| Bermuda | 1997 | 0.889982 | 0.625837 |
| Bermuda | 1998 | 0.898389 | 0.629455 |
| Bermuda | 1999 | 0.901327 | 0.628074 |
| Bermuda | 2000 | 0.917436 | 0.635426 |
| Bermuda | 2001 | 0.930333 | 0.644094 |
| Bermuda | 2002 | 0.916068 | 0.634163 |
| Bermuda | 2003 | 0.872629 | 0.604624 |
| Bermuda | 2004 | 0.847269 | 0.587719 |
| Bermuda | 2005 | 0.818464 | 0.567361 |
| Bermuda | 2006 | 0.787899 | 0.546584 |
| Bermuda | 2007 | 0.77141  | 0.533994 |
| Bermuda | 2008 | 0.766299 | 0.528829 |
| Bermuda | 2009 | 0.771124 | 0.5311   |
| Bermuda | 2010 | 0.759957 | 0.523274 |

|    |         |      |          |          |
|----|---------|------|----------|----------|
| 1  |         |      |          |          |
| 2  |         |      |          |          |
| 3  |         |      |          |          |
| 4  |         |      |          |          |
| 5  | Bermuda | 2011 | 0.75285  | 0.518281 |
| 6  | Bermuda | 2012 | 0.746253 | 0.51245  |
| 7  | Bermuda | 2013 | 0.749626 | 0.513518 |
| 8  | Bermuda | 2014 | 0.757856 | 0.518891 |
| 9  | Bermuda | 2015 | 0.769205 | 0.52558  |
| 10 | Bermuda | 2016 | 0.777422 | 0.531834 |
| 11 | Bermuda | 2017 | 0.777963 | 0.532703 |
| 12 | Bermuda | 2018 | 0.776396 | 0.531267 |
| 13 | Bermuda | 2019 | 0.774579 | 0.529411 |
| 14 | Bhutan  | 1990 | 1.150997 | 0.961563 |
| 15 | Bhutan  | 1991 | 1.159768 | 0.976396 |
| 16 | Bhutan  | 1992 | 1.161489 | 0.988481 |
| 17 | Bhutan  | 1993 | 1.162582 | 1.002648 |
| 18 | Bhutan  | 1994 | 1.16165  | 1.015731 |
| 19 | Bhutan  | 1995 | 1.161533 | 1.029975 |
| 20 | Bhutan  | 1996 | 1.155882 | 1.038013 |
| 21 | Bhutan  | 1997 | 1.14839  | 1.044638 |
| 22 | Bhutan  | 1998 | 1.132276 | 1.043871 |
| 23 | Bhutan  | 1999 | 1.117843 | 1.044833 |
| 24 | Bhutan  | 2000 | 1.104612 | 1.044609 |
| 25 | Bhutan  | 2001 | 1.082835 | 1.036621 |
| 26 | Bhutan  | 2002 | 1.060601 | 1.028499 |
| 27 | Bhutan  | 2003 | 1.048045 | 1.026816 |
| 28 | Bhutan  | 2004 | 1.048342 | 1.036155 |
| 29 | Bhutan  | 2005 | 1.045514 | 1.041306 |
| 30 |         |      |          |          |
| 31 |         |      |          |          |
| 32 |         |      |          |          |
| 33 |         |      |          |          |
| 34 |         |      |          |          |
| 35 |         |      |          |          |
| 36 |         |      |          |          |
| 37 |         |      |          |          |
| 38 |         |      |          |          |
| 39 |         |      |          |          |
| 40 |         |      |          |          |
| 41 |         |      |          |          |
| 42 |         |      |          |          |
| 43 |         |      |          |          |
| 44 |         |      |          |          |
| 45 |         |      |          |          |
| 46 |         |      |          |          |



1  
2  
3  
4  
5  
6  
7  
8  
9  
10  
11  
12  
13  
14  
15  
16  
17  
18  
19  
20  
21  
22  
23  
24  
25  
26  
27  
28  
29  
30  
31  
32  
33  
34  
35  
36  
37  
38  
39  
40  
41  
42  
43  
44  
45  
46

|                                  |      |          |          |
|----------------------------------|------|----------|----------|
| Bhutan                           | 2006 | 1.040212 | 1.045284 |
| Bhutan                           | 2007 | 1.04562  | 1.054329 |
| Bhutan                           | 2008 | 1.020866 | 1.035328 |
| Bhutan                           | 2009 | 0.990419 | 1.00997  |
| Bhutan                           | 2010 | 0.976659 | 0.999512 |
| Bhutan                           | 2011 | 0.963328 | 0.988538 |
| Bhutan                           | 2012 | 0.954794 | 0.981532 |
| Bhutan                           | 2013 | 0.951871 | 0.978607 |
| Bhutan                           | 2014 | 0.951886 | 0.977927 |
| Bhutan                           | 2015 | 0.944963 | 0.969948 |
| Bhutan                           | 2016 | 0.93875  | 0.962066 |
| Bhutan                           | 2017 | 0.941255 | 0.962716 |
| Bhutan                           | 2018 | 0.945337 | 0.964172 |
| Bhutan                           | 2019 | 0.95056  | 0.966948 |
| Bolivia (Plurinational State of) | 1990 | 0.961256 | 0.803475 |
| Bolivia (Plurinational State of) | 1991 | 0.974811 | 0.817495 |
| Bolivia (Plurinational State of) | 1992 | 1.002636 | 0.843273 |
| Bolivia (Plurinational State of) | 1993 | 1.017767 | 0.858119 |
| Bolivia (Plurinational State of) | 1994 | 1.033256 | 0.87403  |
| Bolivia (Plurinational State of) | 1995 | 1.024883 | 0.870068 |
| Bolivia (Plurinational State of) | 1996 | 1.017566 | 0.866427 |
| Bolivia (Plurinational State of) | 1997 | 1.007971 | 0.861273 |
| Bolivia (Plurinational State of) | 1998 | 0.984129 | 0.841985 |
| Bolivia (Plurinational State of) | 1999 | 0.966015 | 0.827632 |
| Bolivia (Plurinational State of) | 2000 | 0.962713 | 0.824518 |

|                                  |      |          |          |
|----------------------------------|------|----------|----------|
| Bolivia (Plurinational State of) | 2001 | 0.958932 | 0.820473 |
| Bolivia (Plurinational State of) | 2002 | 0.976256 | 0.835383 |
| Bolivia (Plurinational State of) | 2003 | 0.98302  | 0.842998 |
| Bolivia (Plurinational State of) | 2004 | 0.994413 | 0.853175 |
| Bolivia (Plurinational State of) | 2005 | 1.000176 | 0.857717 |
| Bolivia (Plurinational State of) | 2006 | 0.994393 | 0.853639 |
| Bolivia (Plurinational State of) | 2007 | 1.012508 | 0.870734 |
| Bolivia (Plurinational State of) | 2008 | 1.012945 | 0.872046 |
| Bolivia (Plurinational State of) | 2009 | 1.014013 | 0.874569 |
| Bolivia (Plurinational State of) | 2010 | 1.020693 | 0.882007 |
| Bolivia (Plurinational State of) | 2011 | 1.0303   | 0.892378 |
| Bolivia (Plurinational State of) | 2012 | 1.042369 | 0.905194 |
| Bolivia (Plurinational State of) | 2013 | 1.032939 | 0.899283 |
| Bolivia (Plurinational State of) | 2014 | 1.009051 | 0.880472 |
| Bolivia (Plurinational State of) | 2015 | 1.012061 | 0.885248 |
| Bolivia (Plurinational State of) | 2016 | 1.029472 | 0.902983 |
| Bolivia (Plurinational State of) | 2017 | 1.025379 | 0.901278 |
| Bolivia (Plurinational State of) | 2018 | 1.020638 | 0.898737 |
| Bolivia (Plurinational State of) | 2019 | 1.018462 | 0.897773 |
| Bosnia and Herzegovina           | 1990 | 1.29983  | 0.970983 |
| Bosnia and Herzegovina           | 1991 | 1.288569 | 0.978089 |
| Bosnia and Herzegovina           | 1992 | 1.355309 | 1.027289 |
| Bosnia and Herzegovina           | 1993 | 1.329285 | 0.98292  |
| Bosnia and Herzegovina           | 1994 | 1.34116  | 0.988002 |
| Bosnia and Herzegovina           | 1995 | 1.337425 | 0.976078 |

1  
2  
3  
4  
5  
6  
7  
8  
9  
10  
11  
12  
13  
14  
15  
16  
17  
18  
19  
20  
21  
22  
23  
24  
25  
26  
27  
28  
29  
30  
31  
32  
33  
34  
35  
36  
37  
38  
39  
40  
41  
42  
43  
44  
45  
46

|                        |      |          |          |
|------------------------|------|----------|----------|
| Bosnia and Herzegovina | 1996 | 1.330841 | 0.969336 |
| Bosnia and Herzegovina | 1997 | 1.386711 | 1.048084 |
| Bosnia and Herzegovina | 1998 | 1.325447 | 0.989462 |
| Bosnia and Herzegovina | 1999 | 1.299408 | 0.931218 |
| Bosnia and Herzegovina | 2000 | 1.218634 | 0.856607 |
| Bosnia and Herzegovina | 2001 | 1.246342 | 0.884627 |
| Bosnia and Herzegovina | 2002 | 1.214282 | 0.851942 |
| Bosnia and Herzegovina | 2003 | 1.13905  | 0.783318 |
| Bosnia and Herzegovina | 2004 | 1.143951 | 0.790536 |
| Bosnia and Herzegovina | 2005 | 1.040577 | 0.726236 |
| Bosnia and Herzegovina | 2006 | 1.06114  | 0.738709 |
| Bosnia and Herzegovina | 2007 | 1.0373   | 0.726447 |
| Bosnia and Herzegovina | 2008 | 1.018065 | 0.713553 |
| Bosnia and Herzegovina | 2009 | 1.009822 | 0.716932 |
| Bosnia and Herzegovina | 2010 | 1.0141   | 0.719194 |
| Bosnia and Herzegovina | 2011 | 0.981583 | 0.69969  |
| Bosnia and Herzegovina | 2012 | 1.005197 | 0.710447 |
| Bosnia and Herzegovina | 2013 | 1.013019 | 0.708952 |
| Bosnia and Herzegovina | 2014 | 1.038881 | 0.725823 |
| Bosnia and Herzegovina | 2015 | 1.049397 | 0.736441 |
| Bosnia and Herzegovina | 2016 | 1.040546 | 0.735288 |
| Bosnia and Herzegovina | 2017 | 1.040503 | 0.737686 |
| Bosnia and Herzegovina | 2018 | 1.04249  | 0.738539 |
| Bosnia and Herzegovina | 2019 | 1.043485 | 0.74054  |
| Botswana               | 1990 | 0.537137 | 0.414065 |

|          |      |          |          |
|----------|------|----------|----------|
| Botswana | 1991 | 0.529932 | 0.411447 |
| Botswana | 1992 | 0.518595 | 0.406089 |
| Botswana | 1993 | 0.500924 | 0.397237 |
| Botswana | 1994 | 0.475532 | 0.382303 |
| Botswana | 1995 | 0.445387 | 0.362409 |
| Botswana | 1996 | 0.411066 | 0.337684 |
| Botswana | 1997 | 0.38692  | 0.317997 |
| Botswana | 1998 | 0.388996 | 0.316316 |
| Botswana | 1999 | 0.399472 | 0.320642 |
| Botswana | 2000 | 0.419352 | 0.331758 |
| Botswana | 2001 | 0.440807 | 0.343843 |
| Botswana | 2002 | 0.462907 | 0.35598  |
| Botswana | 2003 | 0.48127  | 0.365153 |
| Botswana | 2004 | 0.485173 | 0.364081 |
| Botswana | 2005 | 0.486513 | 0.361465 |
| Botswana | 2006 | 0.486971 | 0.359767 |
| Botswana | 2007 | 0.517909 | 0.376773 |
| Botswana | 2008 | 0.56281  | 0.404718 |
| Botswana | 2009 | 0.590041 | 0.421971 |
| Botswana | 2010 | 0.61666  | 0.43976  |
| Botswana | 2011 | 0.650044 | 0.462337 |
| Botswana | 2012 | 0.673408 | 0.478454 |
| Botswana | 2013 | 0.698869 | 0.496157 |
| Botswana | 2014 | 0.729034 | 0.517204 |
| Botswana | 2015 | 0.736907 | 0.525176 |

|    |          |      |          |          |
|----|----------|------|----------|----------|
| 1  |          |      |          |          |
| 2  |          |      |          |          |
| 3  |          |      |          |          |
| 4  |          |      |          |          |
| 5  | Botswana | 2016 | 0.736744 | 0.527736 |
| 6  | Botswana | 2017 | 0.741796 | 0.534897 |
| 7  | Botswana | 2018 | 0.745507 | 0.541574 |
| 8  | Botswana | 2019 | 0.749048 | 0.547359 |
| 9  |          |      |          |          |
| 10 | Brazil   | 1990 | 0.868292 | 0.734531 |
| 11 | Brazil   | 1991 | 0.871669 | 0.733028 |
| 12 | Brazil   | 1992 | 0.873059 | 0.730412 |
| 13 | Brazil   | 1993 | 0.870166 | 0.724411 |
| 14 | Brazil   | 1994 | 0.872946 | 0.725148 |
| 15 | Brazil   | 1995 | 0.888112 | 0.736283 |
| 16 | Brazil   | 1996 | 0.901793 | 0.748348 |
| 17 | Brazil   | 1997 | 0.912694 | 0.754577 |
| 18 | Brazil   | 1998 | 0.915702 | 0.754223 |
| 19 | Brazil   | 1999 | 0.920762 | 0.755906 |
| 20 | Brazil   | 2000 | 0.923142 | 0.754715 |
| 21 | Brazil   | 2001 | 0.92368  | 0.75192  |
| 22 | Brazil   | 2002 | 0.926329 | 0.749707 |
| 23 | Brazil   | 2003 | 0.914675 | 0.736203 |
| 24 | Brazil   | 2004 | 0.908924 | 0.728108 |
| 25 | Brazil   | 2005 | 0.909099 | 0.725899 |
| 26 | Brazil   | 2006 | 0.914362 | 0.726873 |
| 27 | Brazil   | 2007 | 0.917005 | 0.725326 |
| 28 | Brazil   | 2008 | 0.919568 | 0.724005 |
| 29 | Brazil   | 2009 | 0.926131 | 0.725645 |
| 30 | Brazil   | 2010 | 0.929564 | 0.724421 |
| 31 |          |      |          |          |
| 32 |          |      |          |          |
| 33 |          |      |          |          |
| 34 |          |      |          |          |
| 35 |          |      |          |          |
| 36 |          |      |          |          |
| 37 |          |      |          |          |
| 38 |          |      |          |          |
| 39 |          |      |          |          |
| 40 |          |      |          |          |
| 41 |          |      |          |          |
| 42 |          |      |          |          |
| 43 |          |      |          |          |
| 44 |          |      |          |          |
| 45 |          |      |          |          |
| 46 |          |      |          |          |

|                   |      |          |          |
|-------------------|------|----------|----------|
| Brazil            | 2011 | 0.929337 | 0.72113  |
| Brazil            | 2012 | 0.932485 | 0.720529 |
| Brazil            | 2013 | 0.929513 | 0.715356 |
| Brazil            | 2014 | 0.928064 | 0.711744 |
| Brazil            | 2015 | 0.93     | 0.710368 |
| Brazil            | 2016 | 0.921374 | 0.701534 |
| Brazil            | 2017 | 0.923842 | 0.701841 |
| Brazil            | 2018 | 0.931119 | 0.708035 |
| Brazil            | 2019 | 0.926425 | 0.704651 |
| Brunei Darussalam | 1990 | 0.730035 | 0.53404  |
| Brunei Darussalam | 1991 | 0.74702  | 0.551392 |
| Brunei Darussalam | 1992 | 0.753832 | 0.561922 |
| Brunei Darussalam | 1993 | 0.761973 | 0.573017 |
| Brunei Darussalam | 1994 | 0.802694 | 0.622696 |
| Brunei Darussalam | 1995 | 0.817759 | 0.648665 |
| Brunei Darussalam | 1996 | 0.850126 | 0.700386 |
| Brunei Darussalam | 1997 | 0.894011 | 0.778129 |
| Brunei Darussalam | 1998 | 0.873648 | 0.765259 |
| Brunei Darussalam | 1999 | 0.871369 | 0.763791 |
| Brunei Darussalam | 2000 | 0.894188 | 0.798016 |
| Brunei Darussalam | 2001 | 0.90963  | 0.83227  |
| Brunei Darussalam | 2002 | 0.886411 | 0.780404 |
| Brunei Darussalam | 2003 | 0.854292 | 0.71243  |
| Brunei Darussalam | 2004 | 0.859174 | 0.715514 |
| Brunei Darussalam | 2005 | 0.84762  | 0.690099 |

1  
2  
3  
4  
5  
6  
7  
8  
9  
10  
11  
12  
13  
14  
15  
16  
17  
18  
19  
20  
21  
22  
23  
24  
25  
26  
27  
28  
29  
30  
31  
32  
33  
34  
35  
36  
37  
38  
39  
40  
41  
42  
43  
44  
45  
46

|                   |      |          |          |
|-------------------|------|----------|----------|
| Brunei Darussalam | 2006 | 0.852917 | 0.685786 |
| Brunei Darussalam | 2007 | 0.882095 | 0.739274 |
| Brunei Darussalam | 2008 | 0.862392 | 0.697695 |
| Brunei Darussalam | 2009 | 0.856274 | 0.659067 |
| Brunei Darussalam | 2010 | 0.855225 | 0.645933 |
| Brunei Darussalam | 2011 | 0.874377 | 0.639123 |
| Brunei Darussalam | 2012 | 0.893294 | 0.618207 |
| Brunei Darussalam | 2013 | 0.887434 | 0.591531 |
| Brunei Darussalam | 2014 | 0.889551 | 0.570037 |
| Brunei Darussalam | 2015 | 0.908183 | 0.567185 |
| Brunei Darussalam | 2016 | 0.908363 | 0.560784 |
| Brunei Darussalam | 2017 | 0.899665 | 0.555    |
| Brunei Darussalam | 2018 | 0.897283 | 0.547615 |
| Brunei Darussalam | 2019 | 0.897071 | 0.549288 |
| Bulgaria          | 1990 | 0.784462 | 0.633343 |
| Bulgaria          | 1991 | 0.8026   | 0.650828 |
| Bulgaria          | 1992 | 0.791893 | 0.644128 |
| Bulgaria          | 1993 | 0.768757 | 0.619671 |
| Bulgaria          | 1994 | 0.766644 | 0.616116 |
| Bulgaria          | 1995 | 0.784155 | 0.626033 |
| Bulgaria          | 1996 | 0.792337 | 0.62834  |
| Bulgaria          | 1997 | 0.81624  | 0.64351  |
| Bulgaria          | 1998 | 0.810752 | 0.633696 |
| Bulgaria          | 1999 | 0.84948  | 0.659797 |
| Bulgaria          | 2000 | 0.827353 | 0.634195 |

|              |      |          |          |
|--------------|------|----------|----------|
| Bulgaria     | 2001 | 0.799274 | 0.605875 |
| Bulgaria     | 2002 | 0.784054 | 0.590177 |
| Bulgaria     | 2003 | 0.761885 | 0.573417 |
| Bulgaria     | 2004 | 0.750577 | 0.563872 |
| Bulgaria     | 2005 | 0.737531 | 0.550685 |
| Bulgaria     | 2006 | 0.740673 | 0.551365 |
| Bulgaria     | 2007 | 0.742368 | 0.548454 |
| Bulgaria     | 2008 | 0.735157 | 0.539766 |
| Bulgaria     | 2009 | 0.733233 | 0.536161 |
| Bulgaria     | 2010 | 0.744196 | 0.543393 |
| Bulgaria     | 2011 | 0.738048 | 0.535808 |
| Bulgaria     | 2012 | 0.742174 | 0.534777 |
| Bulgaria     | 2013 | 0.748018 | 0.538745 |
| Bulgaria     | 2014 | 0.757692 | 0.54565  |
| Bulgaria     | 2015 | 0.768527 | 0.55158  |
| Bulgaria     | 2016 | 0.751909 | 0.541118 |
| Bulgaria     | 2017 | 0.748123 | 0.537571 |
| Bulgaria     | 2018 | 0.757731 | 0.540935 |
| Bulgaria     | 2019 | 0.759446 | 0.540909 |
| Burkina Faso | 1990 | 0.829528 | 0.714538 |
| Burkina Faso | 1991 | 0.822189 | 0.708491 |
| Burkina Faso | 1992 | 0.828201 | 0.71154  |
| Burkina Faso | 1993 | 0.826131 | 0.708344 |
| Burkina Faso | 1994 | 0.828671 | 0.709142 |
| Burkina Faso | 1995 | 0.832397 | 0.710774 |



1  
2  
3  
4  
5  
6  
7  
8  
9  
10  
11  
12  
13  
14  
15  
16  
17  
18  
19  
20  
21  
22  
23  
24  
25  
26  
27  
28  
29  
30  
31  
32  
33  
34  
35  
36  
37  
38  
39  
40  
41  
42  
43  
44  
45  
46

|              |      |          |          |
|--------------|------|----------|----------|
| Burkina Faso | 1996 | 0.840602 | 0.718042 |
| Burkina Faso | 1997 | 0.855196 | 0.729615 |
| Burkina Faso | 1998 | 0.864386 | 0.736372 |
| Burkina Faso | 1999 | 0.878543 | 0.745592 |
| Burkina Faso | 2000 | 0.896482 | 0.757597 |
| Burkina Faso | 2001 | 0.900208 | 0.758025 |
| Burkina Faso | 2002 | 0.911224 | 0.761005 |
| Burkina Faso | 2003 | 0.922792 | 0.770118 |
| Burkina Faso | 2004 | 0.93218  | 0.777212 |
| Burkina Faso | 2005 | 0.936739 | 0.780345 |
| Burkina Faso | 2006 | 0.941423 | 0.78412  |
| Burkina Faso | 2007 | 0.937418 | 0.779712 |
| Burkina Faso | 2008 | 0.932447 | 0.771837 |
| Burkina Faso | 2009 | 0.932103 | 0.767737 |
| Burkina Faso | 2010 | 0.933339 | 0.766071 |
| Burkina Faso | 2011 | 0.936167 | 0.762728 |
| Burkina Faso | 2012 | 0.933527 | 0.758505 |
| Burkina Faso | 2013 | 0.934327 | 0.753482 |
| Burkina Faso | 2014 | 0.946187 | 0.758672 |
| Burkina Faso | 2015 | 0.965308 | 0.770071 |
| Burkina Faso | 2016 | 0.981429 | 0.778676 |
| Burkina Faso | 2017 | 0.997016 | 0.7884   |
| Burkina Faso | 2018 | 1.006615 | 0.794704 |
| Burkina Faso | 2019 | 1.016562 | 0.801219 |
| Burundi      | 1990 | 0.687664 | 0.563286 |

|         |      |          |          |
|---------|------|----------|----------|
| Burundi | 1991 | 0.694366 | 0.567374 |
| Burundi | 1992 | 0.699582 | 0.571893 |
| Burundi | 1993 | 0.698081 | 0.573959 |
| Burundi | 1994 | 0.696463 | 0.575131 |
| Burundi | 1995 | 0.698699 | 0.57815  |
| Burundi | 1996 | 0.712302 | 0.591291 |
| Burundi | 1997 | 0.719895 | 0.601894 |
| Burundi | 1998 | 0.728608 | 0.614085 |
| Burundi | 1999 | 0.737929 | 0.625256 |
| Burundi | 2000 | 0.734877 | 0.628305 |
| Burundi | 2001 | 0.734869 | 0.631386 |
| Burundi | 2002 | 0.733492 | 0.633296 |
| Burundi | 2003 | 0.733389 | 0.637925 |
| Burundi | 2004 | 0.729231 | 0.640778 |
| Burundi | 2005 | 0.718246 | 0.63823  |
| Burundi | 2006 | 0.703513 | 0.630502 |
| Burundi | 2007 | 0.683863 | 0.619678 |
| Burundi | 2008 | 0.666624 | 0.612776 |
| Burundi | 2009 | 0.663426 | 0.614655 |
| Burundi | 2010 | 0.660953 | 0.616004 |
| Burundi | 2011 | 0.656466 | 0.616586 |
| Burundi | 2012 | 0.654089 | 0.619867 |
| Burundi | 2013 | 0.652141 | 0.622567 |
| Burundi | 2014 | 0.6494   | 0.625271 |
| Burundi | 2015 | 0.644695 | 0.62811  |

1  
2  
3  
4  
5  
6  
7  
8  
9  
10  
11  
12  
13  
14  
15  
16  
17  
18  
19  
20  
21  
22  
23  
24  
25  
26  
27  
28  
29  
30  
31  
32  
33  
34  
35  
36  
37  
38  
39  
40  
41  
42  
43  
44  
45  
46

|            |      |          |          |
|------------|------|----------|----------|
| Burundi    | 2016 | 0.636883 | 0.629837 |
| Burundi    | 2017 | 0.631132 | 0.632785 |
| Burundi    | 2018 | 0.628577 | 0.636035 |
| Burundi    | 2019 | 0.624937 | 0.639786 |
| Cabo Verde | 1990 | 0.785566 | 0.5739   |
| Cabo Verde | 1991 | 0.799078 | 0.581168 |
| Cabo Verde | 1992 | 0.800885 | 0.580711 |
| Cabo Verde | 1993 | 0.780252 | 0.565062 |
| Cabo Verde | 1994 | 0.769012 | 0.55496  |
| Cabo Verde | 1995 | 0.760016 | 0.546382 |
| Cabo Verde | 1996 | 0.725456 | 0.51886  |
| Cabo Verde | 1997 | 0.676563 | 0.479908 |
| Cabo Verde | 1998 | 0.676536 | 0.473741 |
| Cabo Verde | 1999 | 0.676218 | 0.467118 |
| Cabo Verde | 2000 | 0.68503  | 0.466719 |
| Cabo Verde | 2001 | 0.686608 | 0.46229  |
| Cabo Verde | 2002 | 0.688755 | 0.458328 |
| Cabo Verde | 2003 | 0.690284 | 0.453906 |
| Cabo Verde | 2004 | 0.687477 | 0.446744 |
| Cabo Verde | 2005 | 0.684518 | 0.439673 |
| Cabo Verde | 2006 | 0.777244 | 0.500204 |
| Cabo Verde | 2007 | 0.816068 | 0.528048 |
| Cabo Verde | 2008 | 0.819805 | 0.532151 |
| Cabo Verde | 2009 | 0.824293 | 0.537742 |
| Cabo Verde | 2010 | 0.83081  | 0.546195 |

|    |            |      |          |          |
|----|------------|------|----------|----------|
| 5  | Cabo Verde | 2011 | 0.853879 | 0.565047 |
| 6  | Cabo Verde | 2012 | 0.875334 | 0.583896 |
| 7  | Cabo Verde | 2013 | 0.871868 | 0.58662  |
| 9  | Cabo Verde | 2014 | 0.904058 | 0.616563 |
| 10 | Cabo Verde | 2015 | 0.942277 | 0.652128 |
| 11 | Cabo Verde | 2016 | 1.004837 | 0.705484 |
| 12 | Cabo Verde | 2017 | 0.957232 | 0.681284 |
| 13 | Cabo Verde | 2018 | 0.696343 | 0.470762 |
| 14 | Cabo Verde | 2019 | 0.705846 | 0.473874 |
| 17 | Cambodia   | 1990 | 1.272435 | 0.929989 |
| 18 | Cambodia   | 1991 | 1.277283 | 0.931682 |
| 19 | Cambodia   | 1992 | 1.287046 | 0.936978 |
| 20 | Cambodia   | 1993 | 1.299802 | 0.944499 |
| 21 | Cambodia   | 1994 | 1.311296 | 0.951699 |
| 22 | Cambodia   | 1995 | 1.305299 | 0.947258 |
| 23 | Cambodia   | 1996 | 1.305278 | 0.945959 |
| 24 | Cambodia   | 1997 | 1.294164 | 0.937495 |
| 25 | Cambodia   | 1998 | 1.282978 | 0.929409 |
| 26 | Cambodia   | 1999 | 1.272036 | 0.922534 |
| 27 | Cambodia   | 2000 | 1.259729 | 0.913971 |
| 28 | Cambodia   | 2001 | 1.246865 | 0.905562 |
| 29 | Cambodia   | 2002 | 1.239166 | 0.900746 |
| 30 | Cambodia   | 2003 | 1.227679 | 0.89253  |
| 31 | Cambodia   | 2004 | 1.212898 | 0.88247  |
| 32 | Cambodia   | 2005 | 1.193716 | 0.869231 |

1  
2  
3  
4  
5  
6  
7  
8  
9  
10  
11  
12  
13  
14  
15  
16  
17  
18  
19  
20  
21  
22  
23  
24  
25  
26  
27  
28  
29  
30  
31  
32  
33  
34  
35  
36  
37  
38  
39  
40  
41  
42  
43  
44  
45  
46

|          |      |          |          |
|----------|------|----------|----------|
| Cambodia | 2006 | 1.18145  | 0.860138 |
| Cambodia | 2007 | 1.164389 | 0.848923 |
| Cambodia | 2008 | 1.148449 | 0.838274 |
| Cambodia | 2009 | 1.137969 | 0.830565 |
| Cambodia | 2010 | 1.134267 | 0.827896 |
| Cambodia | 2011 | 1.13422  | 0.827352 |
| Cambodia | 2012 | 1.135837 | 0.828119 |
| Cambodia | 2013 | 1.140934 | 0.831604 |
| Cambodia | 2014 | 1.14328  | 0.833467 |
| Cambodia | 2015 | 1.144017 | 0.833629 |
| Cambodia | 2016 | 1.146845 | 0.835286 |
| Cambodia | 2017 | 1.150349 | 0.836871 |
| Cambodia | 2018 | 1.152662 | 0.837604 |
| Cambodia | 2019 | 1.155105 | 0.838245 |
| Cameroon | 1990 | 1.147025 | 1.039542 |
| Cameroon | 1991 | 1.13009  | 1.023941 |
| Cameroon | 1992 | 1.11613  | 1.010117 |
| Cameroon | 1993 | 1.09613  | 0.991193 |
| Cameroon | 1994 | 1.085801 | 0.980193 |
| Cameroon | 1995 | 1.066587 | 0.962355 |
| Cameroon | 1996 | 1.04273  | 0.941254 |
| Cameroon | 1997 | 1.038881 | 0.934436 |
| Cameroon | 1998 | 1.030364 | 0.926553 |
| Cameroon | 1999 | 1.010618 | 0.908515 |
| Cameroon | 2000 | 0.99371  | 0.892449 |

|    |          |      |          |          |
|----|----------|------|----------|----------|
| 1  |          |      |          |          |
| 2  |          |      |          |          |
| 3  |          |      |          |          |
| 4  |          |      |          |          |
| 5  | Cameroon | 2001 | 0.973748 | 0.875349 |
| 6  | Cameroon | 2002 | 0.961464 | 0.860027 |
| 7  | Cameroon | 2003 | 0.950572 | 0.851844 |
| 8  | Cameroon | 2004 | 0.939277 | 0.843458 |
| 9  | Cameroon | 2005 | 0.925508 | 0.832964 |
| 10 | Cameroon | 2006 | 0.916299 | 0.824142 |
| 11 | Cameroon | 2007 | 0.904462 | 0.813191 |
| 12 | Cameroon | 2008 | 0.886022 | 0.796672 |
| 13 | Cameroon | 2009 | 0.876197 | 0.787422 |
| 14 | Cameroon | 2010 | 0.879262 | 0.788679 |
| 15 | Cameroon | 2011 | 0.880561 | 0.789209 |
| 16 | Cameroon | 2012 | 0.878504 | 0.786955 |
| 17 | Cameroon | 2013 | 0.876201 | 0.784414 |
| 18 | Cameroon | 2014 | 0.88642  | 0.793444 |
| 19 | Cameroon | 2015 | 0.894119 | 0.799428 |
| 20 | Cameroon | 2016 | 0.901086 | 0.806824 |
| 21 | Cameroon | 2017 | 0.904634 | 0.810746 |
| 22 | Cameroon | 2018 | 0.904815 | 0.812334 |
| 23 | Cameroon | 2019 | 0.906643 | 0.815062 |
| 24 | Canada   | 1990 | 1.071669 | 0.656583 |
| 25 | Canada   | 1991 | 1.068419 | 0.651509 |
| 26 | Canada   | 1992 | 1.072055 | 0.651547 |
| 27 | Canada   | 1993 | 1.062733 | 0.64336  |
| 28 | Canada   | 1994 | 1.071188 | 0.646973 |
| 29 | Canada   | 1995 | 1.056516 | 0.635922 |
| 30 |          |      |          |          |
| 31 |          |      |          |          |
| 32 |          |      |          |          |
| 33 |          |      |          |          |
| 34 |          |      |          |          |
| 35 |          |      |          |          |
| 36 |          |      |          |          |
| 37 |          |      |          |          |
| 38 |          |      |          |          |
| 39 |          |      |          |          |
| 40 |          |      |          |          |
| 41 |          |      |          |          |
| 42 |          |      |          |          |
| 43 |          |      |          |          |
| 44 |          |      |          |          |
| 45 |          |      |          |          |
| 46 |          |      |          |          |

1  
2  
3  
4  
5  
6  
7  
8  
9  
10  
11  
12  
13  
14  
15  
16  
17  
18  
19  
20  
21  
22  
23  
24  
25  
26  
27  
28  
29  
30  
31  
32  
33  
34  
35  
36  
37  
38  
39  
40  
41  
42  
43  
44  
45  
46

|                          |      |          |          |
|--------------------------|------|----------|----------|
| Canada                   | 1996 | 1.06505  | 0.637783 |
| Canada                   | 1997 | 1.053599 | 0.628887 |
| Canada                   | 1998 | 1.053543 | 0.626099 |
| Canada                   | 1999 | 1.048713 | 0.618933 |
| Canada                   | 2000 | 1.075001 | 0.633436 |
| Canada                   | 2001 | 1.081442 | 0.635703 |
| Canada                   | 2002 | 1.090276 | 0.639234 |
| Canada                   | 2003 | 1.086281 | 0.636843 |
| Canada                   | 2004 | 1.090858 | 0.638593 |
| Canada                   | 2005 | 1.111257 | 0.652645 |
| Canada                   | 2006 | 1.138485 | 0.671429 |
| Canada                   | 2007 | 1.147179 | 0.680731 |
| Canada                   | 2008 | 1.155455 | 0.690482 |
| Canada                   | 2009 | 1.15475  | 0.694508 |
| Canada                   | 2010 | 1.166421 | 0.707449 |
| Canada                   | 2011 | 1.162524 | 0.712348 |
| Canada                   | 2012 | 1.14527  | 0.710073 |
| Canada                   | 2013 | 1.132927 | 0.710844 |
| Canada                   | 2014 | 1.127098 | 0.715051 |
| Canada                   | 2015 | 1.11813  | 0.716868 |
| Canada                   | 2016 | 1.106954 | 0.71676  |
| Canada                   | 2017 | 1.094248 | 0.715128 |
| Canada                   | 2018 | 1.074678 | 0.709354 |
| Canada                   | 2019 | 1.062453 | 0.707807 |
| Central African Republic | 1990 | 0.605335 | 0.494503 |

|                          |      |          |          |
|--------------------------|------|----------|----------|
| Central African Republic | 1991 | 0.595076 | 0.488287 |
| Central African Republic | 1992 | 0.579631 | 0.476163 |
| Central African Republic | 1993 | 0.593358 | 0.485861 |
| Central African Republic | 1994 | 0.597356 | 0.488188 |
| Central African Republic | 1995 | 0.60126  | 0.490392 |
| Central African Republic | 1996 | 0.606962 | 0.494629 |
| Central African Republic | 1997 | 0.606767 | 0.493809 |
| Central African Republic | 1998 | 0.60576  | 0.491861 |
| Central African Republic | 1999 | 0.601875 | 0.487075 |
| Central African Republic | 2000 | 0.599029 | 0.482639 |
| Central African Republic | 2001 | 0.598767 | 0.482322 |
| Central African Republic | 2002 | 0.601461 | 0.484166 |
| Central African Republic | 2003 | 0.60518  | 0.487199 |
| Central African Republic | 2004 | 0.605982 | 0.487695 |
| Central African Republic | 2005 | 0.60574  | 0.486763 |
| Central African Republic | 2006 | 0.606321 | 0.485265 |
| Central African Republic | 2007 | 0.605549 | 0.483734 |
| Central African Republic | 2008 | 0.602208 | 0.479866 |
| Central African Republic | 2009 | 0.602173 | 0.479239 |
| Central African Republic | 2010 | 0.600321 | 0.478502 |
| Central African Republic | 2011 | 0.601359 | 0.479995 |
| Central African Republic | 2012 | 0.604953 | 0.483166 |
| Central African Republic | 2013 | 0.609224 | 0.485905 |
| Central African Republic | 2014 | 0.609242 | 0.485843 |
| Central African Republic | 2015 | 0.606339 | 0.484164 |



|    |                          |      |          |          |
|----|--------------------------|------|----------|----------|
| 1  |                          |      |          |          |
| 2  |                          |      |          |          |
| 3  |                          |      |          |          |
| 4  |                          |      |          |          |
| 5  | Central African Republic | 2016 | 0.601069 | 0.48213  |
| 6  | Central African Republic | 2017 | 0.596947 | 0.480092 |
| 7  | Central African Republic | 2018 | 0.594318 | 0.478991 |
| 8  | Central African Republic | 2019 | 0.592694 | 0.479463 |
| 9  |                          |      |          |          |
| 10 | Chad                     | 1990 | 0.834872 | 0.761775 |
| 11 | Chad                     | 1991 | 0.821838 | 0.752272 |
| 12 | Chad                     | 1992 | 0.80896  | 0.744471 |
| 13 | Chad                     | 1993 | 0.792107 | 0.732762 |
| 14 | Chad                     | 1994 | 0.769123 | 0.714465 |
| 15 | Chad                     | 1995 | 0.753542 | 0.702173 |
| 16 | Chad                     | 1996 | 0.731651 | 0.68299  |
| 17 | Chad                     | 1997 | 0.713377 | 0.666729 |
| 18 | Chad                     | 1998 | 0.700701 | 0.655117 |
| 19 | Chad                     | 1999 | 0.682246 | 0.638162 |
| 20 | Chad                     | 2000 | 0.669872 | 0.626096 |
| 21 | Chad                     | 2001 | 0.662084 | 0.61966  |
| 22 | Chad                     | 2002 | 0.65693  | 0.616713 |
| 23 | Chad                     | 2003 | 0.654422 | 0.618421 |
| 24 | Chad                     | 2004 | 0.644129 | 0.613396 |
| 25 | Chad                     | 2005 | 0.63571  | 0.610532 |
| 26 | Chad                     | 2006 | 0.628836 | 0.607959 |
| 27 | Chad                     | 2007 | 0.622864 | 0.607788 |
| 28 | Chad                     | 2008 | 0.614477 | 0.605515 |
| 29 | Chad                     | 2009 | 0.603446 | 0.603535 |
| 30 | Chad                     | 2010 | 0.597793 | 0.602175 |
| 31 |                          |      |          |          |
| 32 |                          |      |          |          |
| 33 |                          |      |          |          |
| 34 |                          |      |          |          |
| 35 |                          |      |          |          |
| 36 |                          |      |          |          |
| 37 |                          |      |          |          |
| 38 |                          |      |          |          |
| 39 |                          |      |          |          |
| 40 |                          |      |          |          |
| 41 |                          |      |          |          |
| 42 |                          |      |          |          |
| 43 |                          |      |          |          |
| 44 |                          |      |          |          |
| 45 |                          |      |          |          |
| 46 |                          |      |          |          |

|       |      |          |          |
|-------|------|----------|----------|
| Chad  | 2011 | 0.591857 | 0.601036 |
| Chad  | 2012 | 0.586086 | 0.600795 |
| Chad  | 2013 | 0.582037 | 0.600969 |
| Chad  | 2014 | 0.578729 | 0.604162 |
| Chad  | 2015 | 0.577133 | 0.606962 |
| Chad  | 2016 | 0.577592 | 0.611944 |
| Chad  | 2017 | 0.579311 | 0.618026 |
| Chad  | 2018 | 0.579088 | 0.621805 |
| Chad  | 2019 | 0.578632 | 0.626191 |
| Chile | 1990 | 0.975267 | 0.789928 |
| Chile | 1991 | 1.004222 | 0.810795 |
| Chile | 1992 | 1.03789  | 0.832208 |
| Chile | 1993 | 1.027902 | 0.817282 |
| Chile | 1994 | 1.024455 | 0.811473 |
| Chile | 1995 | 1.007339 | 0.788872 |
| Chile | 1996 | 0.980229 | 0.755604 |
| Chile | 1997 | 0.99706  | 0.765156 |
| Chile | 1998 | 1.032587 | 0.788071 |
| Chile | 1999 | 1.05249  | 0.799165 |
| Chile | 2000 | 1.06127  | 0.804204 |
| Chile | 2001 | 1.073648 | 0.813752 |
| Chile | 2002 | 1.076179 | 0.809961 |
| Chile | 2003 | 1.080699 | 0.808243 |
| Chile | 2004 | 1.09034  | 0.810053 |
| Chile | 2005 | 1.098112 | 0.812524 |

1  
2  
3  
4  
5  
6  
7  
8  
9  
10  
11  
12  
13  
14  
15  
16  
17  
18  
19  
20  
21  
22  
23  
24  
25  
26  
27  
28  
29  
30  
31  
32  
33  
34  
35  
36  
37  
38  
39  
40  
41  
42  
43  
44  
45  
46

|       |      |          |          |
|-------|------|----------|----------|
| Chile | 2006 | 1.101727 | 0.813429 |
| Chile | 2007 | 1.099118 | 0.810954 |
| Chile | 2008 | 1.101981 | 0.816507 |
| Chile | 2009 | 1.087498 | 0.804882 |
| Chile | 2010 | 1.090558 | 0.803135 |
| Chile | 2011 | 1.106878 | 0.813052 |
| Chile | 2012 | 1.114865 | 0.818805 |
| Chile | 2013 | 1.110409 | 0.816162 |
| Chile | 2014 | 1.0971   | 0.804446 |
| Chile | 2015 | 1.100775 | 0.805611 |
| Chile | 2016 | 1.103035 | 0.806088 |
| Chile | 2017 | 1.114846 | 0.814555 |
| Chile | 2018 | 1.11631  | 0.815553 |
| Chile | 2019 | 1.114836 | 0.814624 |
| China | 1990 | 0.967823 | 0.814115 |
| China | 1991 | 0.958559 | 0.806344 |
| China | 1992 | 0.957942 | 0.80596  |
| China | 1993 | 0.964164 | 0.811179 |
| China | 1994 | 0.973764 | 0.813081 |
| China | 1995 | 0.959877 | 0.800819 |
| China | 1996 | 0.957836 | 0.79771  |
| China | 1997 | 0.962476 | 0.799933 |
| China | 1998 | 0.959408 | 0.790422 |
| China | 1999 | 0.962405 | 0.793427 |
| China | 2000 | 0.96278  | 0.800564 |

|          |      |          |          |
|----------|------|----------|----------|
| China    | 2001 | 0.950333 | 0.789064 |
| China    | 2002 | 0.932042 | 0.776288 |
| China    | 2003 | 0.921262 | 0.772159 |
| China    | 2004 | 0.906997 | 0.757937 |
| China    | 2005 | 0.88725  | 0.735528 |
| China    | 2006 | 0.897301 | 0.739151 |
| China    | 2007 | 0.892122 | 0.729779 |
| China    | 2008 | 0.88588  | 0.720897 |
| China    | 2009 | 0.880109 | 0.711189 |
| China    | 2010 | 0.877856 | 0.705003 |
| China    | 2011 | 0.877119 | 0.697836 |
| China    | 2012 | 0.854498 | 0.672527 |
| China    | 2013 | 0.849703 | 0.664253 |
| China    | 2014 | 0.845928 | 0.661064 |
| China    | 2015 | 0.836498 | 0.650847 |
| China    | 2016 | 0.840203 | 0.651806 |
| China    | 2017 | 0.858599 | 0.666526 |
| China    | 2018 | 0.878564 | 0.683378 |
| China    | 2019 | 0.887628 | 0.688388 |
| Colombia | 1990 | 0.92605  | 0.87332  |
| Colombia | 1991 | 0.88317  | 0.835151 |
| Colombia | 1992 | 0.881827 | 0.827676 |
| Colombia | 1993 | 0.897087 | 0.835138 |
| Colombia | 1994 | 0.897415 | 0.830507 |
| Colombia | 1995 | 0.883693 | 0.818259 |

|          |      |          |          |
|----------|------|----------|----------|
| Colombia | 1996 | 0.860237 | 0.790636 |
| Colombia | 1997 | 0.876126 | 0.798379 |
| Colombia | 1998 | 0.887859 | 0.799727 |
| Colombia | 1999 | 0.863474 | 0.772837 |
| Colombia | 2000 | 0.849005 | 0.755909 |
| Colombia | 2001 | 0.850541 | 0.749405 |
| Colombia | 2002 | 0.737513 | 0.644557 |
| Colombia | 2003 | 0.823671 | 0.713566 |
| Colombia | 2004 | 0.815959 | 0.70425  |
| Colombia | 2005 | 0.846694 | 0.725794 |
| Colombia | 2006 | 0.823752 | 0.702385 |
| Colombia | 2007 | 0.834971 | 0.708499 |
| Colombia | 2008 | 0.821626 | 0.69362  |
| Colombia | 2009 | 0.771829 | 0.648857 |
| Colombia | 2010 | 0.78163  | 0.652348 |
| Colombia | 2011 | 0.791119 | 0.65474  |
| Colombia | 2012 | 0.786915 | 0.647334 |
| Colombia | 2013 | 0.795163 | 0.650472 |
| Colombia | 2014 | 0.847073 | 0.690264 |
| Colombia | 2015 | 0.832346 | 0.676081 |
| Colombia | 2016 | 0.829521 | 0.671116 |
| Colombia | 2017 | 0.828961 | 0.667807 |
| Colombia | 2018 | 0.843668 | 0.676432 |
| Colombia | 2019 | 0.843713 | 0.675001 |
| Comoros  | 1990 | 0.733786 | 0.662082 |

|         |      |          |          |
|---------|------|----------|----------|
| Comoros | 1991 | 0.7402   | 0.663758 |
| Comoros | 1992 | 0.745905 | 0.664646 |
| Comoros | 1993 | 0.757544 | 0.670189 |
| Comoros | 1994 | 0.766249 | 0.672645 |
| Comoros | 1995 | 0.775972 | 0.676143 |
| Comoros | 1996 | 0.789989 | 0.682161 |
| Comoros | 1997 | 0.802756 | 0.68778  |
| Comoros | 1998 | 0.828547 | 0.704046 |
| Comoros | 1999 | 0.860904 | 0.725442 |
| Comoros | 2000 | 0.88092  | 0.738351 |
| Comoros | 2001 | 0.907113 | 0.756097 |
| Comoros | 2002 | 0.917167 | 0.761638 |
| Comoros | 2003 | 0.939988 | 0.777236 |
| Comoros | 2004 | 0.947701 | 0.781221 |
| Comoros | 2005 | 0.953186 | 0.787593 |
| Comoros | 2006 | 0.96207  | 0.788326 |
| Comoros | 2007 | 0.950667 | 0.783126 |
| Comoros | 2008 | 0.954273 | 0.785029 |
| Comoros | 2009 | 0.965166 | 0.788867 |
| Comoros | 2010 | 0.983476 | 0.796443 |
| Comoros | 2011 | 0.986429 | 0.798943 |
| Comoros | 2012 | 0.993435 | 0.803484 |
| Comoros | 2013 | 0.994148 | 0.805074 |
| Comoros | 2014 | 0.99033  | 0.809445 |
| Comoros | 2015 | 0.995551 | 0.813129 |

1  
2  
3  
4  
5  
6  
7  
8  
9  
10  
11  
12  
13  
14  
15  
16  
17  
18  
19  
20  
21  
22  
23  
24  
25  
26  
27  
28  
29  
30  
31  
32  
33  
34  
35  
36  
37  
38  
39  
40  
41  
42  
43  
44  
45  
46

|         |      |          |          |
|---------|------|----------|----------|
| Comoros | 2016 | 1.000726 | 0.815787 |
| Comoros | 2017 | 1.006585 | 0.819901 |
| Comoros | 2018 | 1.010868 | 0.821308 |
| Comoros | 2019 | 1.012969 | 0.822834 |
| Congo   | 1990 | 0.751571 | 0.620385 |
| Congo   | 1991 | 0.757008 | 0.620743 |
| Congo   | 1992 | 0.751454 | 0.61207  |
| Congo   | 1993 | 0.767738 | 0.621074 |
| Congo   | 1994 | 0.793581 | 0.640092 |
| Congo   | 1995 | 0.807649 | 0.649302 |
| Congo   | 1996 | 0.843536 | 0.675503 |
| Congo   | 1997 | 0.849181 | 0.678751 |
| Congo   | 1998 | 0.861181 | 0.681345 |
| Congo   | 1999 | 0.873966 | 0.688289 |
| Congo   | 2000 | 0.887117 | 0.693063 |
| Congo   | 2001 | 0.894852 | 0.695199 |
| Congo   | 2002 | 0.91501  | 0.707194 |
| Congo   | 2003 | 0.938097 | 0.727745 |
| Congo   | 2004 | 0.965721 | 0.749928 |
| Congo   | 2005 | 0.999334 | 0.777948 |
| Congo   | 2006 | 1.01017  | 0.790931 |
| Congo   | 2007 | 1.01219  | 0.799437 |
| Congo   | 2008 | 1.011191 | 0.805224 |
| Congo   | 2009 | 1.001536 | 0.805305 |
| Congo   | 2010 | 1.005744 | 0.814986 |

|              |      |          |          |
|--------------|------|----------|----------|
| Congo        | 2011 | 0.995978 | 0.812365 |
| Congo        | 2012 | 0.976587 | 0.809515 |
| Congo        | 2013 | 0.96994  | 0.812844 |
| Congo        | 2014 | 0.962707 | 0.814701 |
| Congo        | 2015 | 0.950028 | 0.810594 |
| Congo        | 2016 | 0.936194 | 0.807464 |
| Congo        | 2017 | 0.929756 | 0.808413 |
| Congo        | 2018 | 0.918173 | 0.804938 |
| Congo        | 2019 | 0.907093 | 0.801955 |
| Cook Islands | 1990 | 0.731273 | 0.737078 |
| Cook Islands | 1991 | 0.714071 | 0.722799 |
| Cook Islands | 1992 | 0.703288 | 0.713012 |
| Cook Islands | 1993 | 0.694466 | 0.703081 |
| Cook Islands | 1994 | 0.691835 | 0.697671 |
| Cook Islands | 1995 | 0.690798 | 0.693392 |
| Cook Islands | 1996 | 0.692286 | 0.692624 |
| Cook Islands | 1997 | 0.691053 | 0.690664 |
| Cook Islands | 1998 | 0.687318 | 0.687769 |
| Cook Islands | 1999 | 0.678993 | 0.681139 |
| Cook Islands | 2000 | 0.670422 | 0.674048 |
| Cook Islands | 2001 | 0.676639 | 0.680259 |
| Cook Islands | 2002 | 0.677434 | 0.678221 |
| Cook Islands | 2003 | 0.672888 | 0.667111 |
| Cook Islands | 2004 | 0.672924 | 0.657395 |
| Cook Islands | 2005 | 0.660459 | 0.636278 |



|    |              |      |          |          |
|----|--------------|------|----------|----------|
| 1  |              |      |          |          |
| 2  |              |      |          |          |
| 3  |              |      |          |          |
| 4  |              |      |          |          |
| 5  | Cook Islands | 2006 | 0.662874 | 0.630598 |
| 6  | Cook Islands | 2007 | 0.655072 | 0.618395 |
| 7  | Cook Islands | 2008 | 0.655387 | 0.615491 |
| 8  | Cook Islands | 2009 | 0.660637 | 0.619082 |
| 9  | Cook Islands | 2010 | 0.662691 | 0.621673 |
| 10 | Cook Islands | 2011 | 0.64694  | 0.607209 |
| 11 | Cook Islands | 2012 | 0.643794 | 0.603641 |
| 12 | Cook Islands | 2013 | 0.648095 | 0.605316 |
| 13 | Cook Islands | 2014 | 0.648776 | 0.602425 |
| 14 | Cook Islands | 2015 | 0.646748 | 0.597015 |
| 15 | Cook Islands | 2016 | 0.64459  | 0.590916 |
| 16 | Cook Islands | 2017 | 0.657328 | 0.598123 |
| 17 | Cook Islands | 2018 | 0.665537 | 0.601679 |
| 18 | Cook Islands | 2019 | 0.673095 | 0.605095 |
| 19 | Costa Rica   | 1990 | 0.842686 | 0.780245 |
| 20 | Costa Rica   | 1991 | 0.846408 | 0.779555 |
| 21 | Costa Rica   | 1992 | 0.801387 | 0.735808 |
| 22 | Costa Rica   | 1993 | 0.822401 | 0.751924 |
| 23 | Costa Rica   | 1994 | 0.818493 | 0.744542 |
| 24 | Costa Rica   | 1995 | 0.809652 | 0.735454 |
| 25 | Costa Rica   | 1996 | 0.823017 | 0.742523 |
| 26 | Costa Rica   | 1997 | 0.81881  | 0.739022 |
| 27 | Costa Rica   | 1998 | 0.833152 | 0.75157  |
| 28 | Costa Rica   | 1999 | 0.772513 | 0.695838 |
| 29 | Costa Rica   | 2000 | 0.772973 | 0.691908 |
| 30 |              |      |          |          |
| 31 |              |      |          |          |
| 32 |              |      |          |          |
| 33 |              |      |          |          |
| 34 |              |      |          |          |
| 35 |              |      |          |          |
| 36 |              |      |          |          |
| 37 |              |      |          |          |
| 38 |              |      |          |          |
| 39 |              |      |          |          |
| 40 |              |      |          |          |
| 41 |              |      |          |          |
| 42 |              |      |          |          |
| 43 |              |      |          |          |
| 44 |              |      |          |          |
| 45 |              |      |          |          |
| 46 |              |      |          |          |

|            |      |          |          |
|------------|------|----------|----------|
| Costa Rica | 2001 | 0.792404 | 0.706965 |
| Costa Rica | 2002 | 0.785335 | 0.698226 |
| Costa Rica | 2003 | 0.789385 | 0.699126 |
| Costa Rica | 2004 | 0.775158 | 0.685789 |
| Costa Rica | 2005 | 0.823794 | 0.726354 |
| Costa Rica | 2006 | 0.794886 | 0.69863  |
| Costa Rica | 2007 | 0.804319 | 0.704393 |
| Costa Rica | 2008 | 0.802687 | 0.700785 |
| Costa Rica | 2009 | 0.824271 | 0.715522 |
| Costa Rica | 2010 | 0.752826 | 0.65028  |
| Costa Rica | 2011 | 0.779381 | 0.666415 |
| Costa Rica | 2012 | 0.797407 | 0.675406 |
| Costa Rica | 2013 | 0.796876 | 0.669869 |
| Costa Rica | 2014 | 0.79033  | 0.658754 |
| Costa Rica | 2015 | 0.788694 | 0.653029 |
| Costa Rica | 2016 | 0.795657 | 0.658021 |
| Costa Rica | 2017 | 0.805902 | 0.664662 |
| Costa Rica | 2018 | 0.785138 | 0.644119 |
| Costa Rica | 2019 | 0.794065 | 0.647561 |
| Croatia    | 1990 | 1.120185 | 0.65127  |
| Croatia    | 1991 | 1.125968 | 0.653247 |
| Croatia    | 1992 | 1.121772 | 0.655144 |
| Croatia    | 1993 | 1.111291 | 0.645602 |
| Croatia    | 1994 | 1.121473 | 0.65099  |
| Croatia    | 1995 | 1.139708 | 0.659749 |

1  
2  
3  
4  
5  
6  
7  
8  
9  
10  
11  
12  
13  
14  
15  
16  
17  
18  
19  
20  
21  
22  
23  
24  
25  
26  
27  
28  
29  
30  
31  
32  
33  
34  
35  
36  
37  
38  
39  
40  
41  
42  
43  
44  
45  
46

|         |      |          |          |
|---------|------|----------|----------|
| Croatia | 1996 | 1.161451 | 0.665951 |
| Croatia | 1997 | 1.152629 | 0.651192 |
| Croatia | 1998 | 1.166428 | 0.64639  |
| Croatia | 1999 | 1.196099 | 0.654948 |
| Croatia | 2000 | 1.216367 | 0.660369 |
| Croatia | 2001 | 1.220003 | 0.655333 |
| Croatia | 2002 | 1.248965 | 0.670539 |
| Croatia | 2003 | 1.232678 | 0.662375 |
| Croatia | 2004 | 1.28712  | 0.691856 |
| Croatia | 2005 | 1.241395 | 0.66823  |
| Croatia | 2006 | 1.256257 | 0.676099 |
| Croatia | 2007 | 1.282833 | 0.69208  |
| Croatia | 2008 | 1.256338 | 0.68161  |
| Croatia | 2009 | 1.257667 | 0.683845 |
| Croatia | 2010 | 1.318366 | 0.725261 |
| Croatia | 2011 | 1.290008 | 0.714134 |
| Croatia | 2012 | 1.250825 | 0.693977 |
| Croatia | 2013 | 1.318069 | 0.727072 |
| Croatia | 2014 | 1.304176 | 0.721959 |
| Croatia | 2015 | 1.322415 | 0.740471 |
| Croatia | 2016 | 1.287002 | 0.722383 |
| Croatia | 2017 | 1.265466 | 0.716749 |
| Croatia | 2018 | 1.256311 | 0.71655  |
| Croatia | 2019 | 1.242454 | 0.714384 |
| Cuba    | 1990 | 0.727847 | 0.702803 |

|      |      |          |          |
|------|------|----------|----------|
| Cuba | 1991 | 0.724469 | 0.694605 |
| Cuba | 1992 | 0.729795 | 0.694633 |
| Cuba | 1993 | 0.720995 | 0.682637 |
| Cuba | 1994 | 0.70017  | 0.659501 |
| Cuba | 1995 | 0.738602 | 0.691371 |
| Cuba | 1996 | 0.766014 | 0.714588 |
| Cuba | 1997 | 0.765753 | 0.712793 |
| Cuba | 1998 | 0.800248 | 0.743681 |
| Cuba | 1999 | 0.812952 | 0.753939 |
| Cuba | 2000 | 0.881295 | 0.814171 |
| Cuba | 2001 | 0.959164 | 0.883325 |
| Cuba | 2002 | 0.988012 | 0.90707  |
| Cuba | 2003 | 1.02399  | 0.936121 |
| Cuba | 2004 | 1.061575 | 0.965081 |
| Cuba | 2005 | 1.074199 | 0.973171 |
| Cuba | 2006 | 1.080161 | 0.975409 |
| Cuba | 2007 | 1.094049 | 0.985931 |
| Cuba | 2008 | 1.115955 | 1.001873 |
| Cuba | 2009 | 1.088237 | 0.972591 |
| Cuba | 2010 | 1.080138 | 0.961158 |
| Cuba | 2011 | 1.104658 | 0.980563 |
| Cuba | 2012 | 1.059809 | 0.939556 |
| Cuba | 2013 | 1.057449 | 0.934553 |
| Cuba | 2014 | 1.045602 | 0.920903 |
| Cuba | 2015 | 1.024565 | 0.900839 |

1  
2  
3  
4  
5  
6  
7  
8  
9  
10  
11  
12  
13  
14  
15  
16  
17  
18  
19  
20  
21  
22  
23  
24  
25  
26  
27  
28  
29  
30  
31  
32  
33  
34  
35  
36  
37  
38  
39  
40  
41  
42  
43  
44  
45  
46

|        |      |          |          |
|--------|------|----------|----------|
| Cuba   | 2016 | 0.999353 | 0.875106 |
| Cuba   | 2017 | 0.976223 | 0.851947 |
| Cuba   | 2018 | 0.979438 | 0.850798 |
| Cuba   | 2019 | 0.984318 | 0.851479 |
| Cyprus | 1990 | 0.973492 | 0.995284 |
| Cyprus | 1991 | 0.870799 | 0.852337 |
| Cyprus | 1992 | 0.836617 | 0.776383 |
| Cyprus | 1993 | 0.865602 | 0.768364 |
| Cyprus | 1994 | 0.894084 | 0.769336 |
| Cyprus | 1995 | 0.884558 | 0.755664 |
| Cyprus | 1996 | 0.850063 | 0.727604 |
| Cyprus | 1997 | 0.836166 | 0.718292 |
| Cyprus | 1998 | 0.862069 | 0.738631 |
| Cyprus | 1999 | 0.890677 | 0.7614   |
| Cyprus | 2000 | 0.839486 | 0.709185 |
| Cyprus | 2001 | 0.828953 | 0.682359 |
| Cyprus | 2002 | 0.831988 | 0.672456 |
| Cyprus | 2003 | 0.888021 | 0.684125 |
| Cyprus | 2004 | 0.889668 | 0.677149 |
| Cyprus | 2005 | 0.883011 | 0.659401 |
| Cyprus | 2006 | 0.876697 | 0.632202 |
| Cyprus | 2007 | 0.867611 | 0.61137  |
| Cyprus | 2008 | 0.874585 | 0.601709 |
| Cyprus | 2009 | 0.842293 | 0.542734 |
| Cyprus | 2010 | 0.842268 | 0.527126 |

|         |      |          |          |
|---------|------|----------|----------|
| Cyprus  | 2011 | 0.902202 | 0.551805 |
| Cyprus  | 2012 | 0.932618 | 0.566257 |
| Cyprus  | 2013 | 0.954078 | 0.588914 |
| Cyprus  | 2014 | 0.981005 | 0.618201 |
| Cyprus  | 2015 | 0.972019 | 0.633882 |
| Cyprus  | 2016 | 0.994398 | 0.701614 |
| Cyprus  | 2017 | 1.049295 | 0.817407 |
| Cyprus  | 2018 | 1.005187 | 0.80001  |
| Cyprus  | 2019 | 0.963696 | 0.782896 |
| Czechia | 1990 | 1.016176 | 0.624468 |
| Czechia | 1991 | 1.092255 | 0.665403 |
| Czechia | 1992 | 1.114824 | 0.676432 |
| Czechia | 1993 | 1.165005 | 0.705793 |
| Czechia | 1994 | 1.161923 | 0.705491 |
| Czechia | 1995 | 1.221828 | 0.746068 |
| Czechia | 1996 | 1.210004 | 0.738504 |
| Czechia | 1997 | 1.2386   | 0.75613  |
| Czechia | 1998 | 1.243416 | 0.755395 |
| Czechia | 1999 | 1.216241 | 0.737046 |
| Czechia | 2000 | 1.251442 | 0.756081 |
| Czechia | 2001 | 1.23813  | 0.748034 |
| Czechia | 2002 | 1.232174 | 0.737573 |
| Czechia | 2003 | 1.2408   | 0.740963 |
| Czechia | 2004 | 1.219882 | 0.723872 |
| Czechia | 2005 | 1.260818 | 0.743677 |

|                 |      |          |          |
|-----------------|------|----------|----------|
| Czechia         | 2006 | 1.263043 | 0.740681 |
| Czechia         | 2007 | 1.254411 | 0.738889 |
| Czechia         | 2008 | 1.2398   | 0.735183 |
| Czechia         | 2009 | 1.218698 | 0.726824 |
| Czechia         | 2010 | 1.206849 | 0.719868 |
| Czechia         | 2011 | 1.208496 | 0.722033 |
| Czechia         | 2012 | 1.210538 | 0.724006 |
| Czechia         | 2013 | 1.220183 | 0.728389 |
| Czechia         | 2014 | 1.220982 | 0.727287 |
| Czechia         | 2015 | 1.22085  | 0.726128 |
| Czechia         | 2016 | 1.216345 | 0.725895 |
| Czechia         | 2017 | 1.174381 | 0.703135 |
| Czechia         | 2018 | 1.163977 | 0.704178 |
| Czechia         | 2019 | 1.15844  | 0.708733 |
| C ɔ te d'Ivoire | 1990 | 0.608796 | 0.660555 |
| C ɔ te d'Ivoire | 1991 | 0.595623 | 0.644126 |
| C ɔ te d'Ivoire | 1992 | 0.578152 | 0.627977 |
| C ɔ te d'Ivoire | 1993 | 0.56919  | 0.618807 |
| C ɔ te d'Ivoire | 1994 | 0.557509 | 0.606066 |
| C ɔ te d'Ivoire | 1995 | 0.549824 | 0.596539 |
| C ɔ te d'Ivoire | 1996 | 0.548132 | 0.592989 |
| C ɔ te d'Ivoire | 1997 | 0.552384 | 0.594317 |
| C ɔ te d'Ivoire | 1998 | 0.559997 | 0.597753 |
| C ɔ te d'Ivoire | 1999 | 0.564649 | 0.599111 |
| C ɔ te d'Ivoire | 2000 | 0.571707 | 0.601928 |

|                                       |      |          |          |
|---------------------------------------|------|----------|----------|
| C 么 te d'Ivoire                       | 2001 | 0.585033 | 0.608489 |
| C 么 te d'Ivoire                       | 2002 | 0.595451 | 0.615232 |
| C 么 te d'Ivoire                       | 2003 | 0.602649 | 0.618669 |
| C 么 te d'Ivoire                       | 2004 | 0.604192 | 0.619534 |
| C 么 te d'Ivoire                       | 2005 | 0.613897 | 0.625708 |
| C 么 te d'Ivoire                       | 2006 | 0.622914 | 0.631968 |
| C 么 te d'Ivoire                       | 2007 | 0.625933 | 0.632453 |
| C 么 te d'Ivoire                       | 2008 | 0.630376 | 0.635391 |
| C 么 te d'Ivoire                       | 2009 | 0.632111 | 0.63704  |
| C 么 te d'Ivoire                       | 2010 | 0.629477 | 0.635272 |
| C 么 te d'Ivoire                       | 2011 | 0.627319 | 0.633461 |
| C 么 te d'Ivoire                       | 2012 | 0.625624 | 0.632268 |
| C 么 te d'Ivoire                       | 2013 | 0.623281 | 0.631079 |
| C 么 te d'Ivoire                       | 2014 | 0.62667  | 0.635978 |
| C 么 te d'Ivoire                       | 2015 | 0.631361 | 0.641248 |
| C 么 te d'Ivoire                       | 2016 | 0.635046 | 0.64627  |
| C 么 te d'Ivoire                       | 2017 | 0.637611 | 0.650224 |
| C 么 te d'Ivoire                       | 2018 | 0.641324 | 0.658071 |
| C 么 te d'Ivoire                       | 2019 | 0.643183 | 0.663257 |
| Democratic People's Republic of Korea | 1990 | 1.519679 | 0.93015  |
| Democratic People's Republic of Korea | 1991 | 1.517594 | 0.928075 |
| Democratic People's Republic of Korea | 1992 | 1.515332 | 0.925618 |
| Democratic People's Republic of Korea | 1993 | 1.511403 | 0.922131 |
| Democratic People's Republic of Korea | 1994 | 1.508383 | 0.918629 |
| Democratic People's Republic of Korea | 1995 | 1.50472  | 0.916326 |



|    |                                       |      |          |          |
|----|---------------------------------------|------|----------|----------|
| 1  |                                       |      |          |          |
| 2  |                                       |      |          |          |
| 3  |                                       |      |          |          |
| 4  |                                       |      |          |          |
| 5  | Democratic People's Republic of Korea | 1996 | 1.499132 | 0.914125 |
| 6  | Democratic People's Republic of Korea | 1997 | 1.48746  | 0.907333 |
| 7  | Democratic People's Republic of Korea | 1998 | 1.47484  | 0.898221 |
| 8  | Democratic People's Republic of Korea | 1999 | 1.465112 | 0.889807 |
| 9  | Democratic People's Republic of Korea | 2000 | 1.457588 | 0.883    |
| 10 | Democratic People's Republic of Korea | 2001 | 1.449234 | 0.87407  |
| 11 | Democratic People's Republic of Korea | 2002 | 1.439481 | 0.863734 |
| 12 | Democratic People's Republic of Korea | 2003 | 1.428879 | 0.857005 |
| 13 | Democratic People's Republic of Korea | 2004 | 1.420628 | 0.85164  |
| 14 | Democratic People's Republic of Korea | 2005 | 1.413032 | 0.846354 |
| 15 | Democratic People's Republic of Korea | 2006 | 1.408239 | 0.843679 |
| 16 | Democratic People's Republic of Korea | 2007 | 1.404697 | 0.842011 |
| 17 | Democratic People's Republic of Korea | 2008 | 1.404365 | 0.842973 |
| 18 | Democratic People's Republic of Korea | 2009 | 1.405944 | 0.8431   |
| 19 | Democratic People's Republic of Korea | 2010 | 1.404803 | 0.841923 |
| 20 | Democratic People's Republic of Korea | 2011 | 1.398525 | 0.838881 |
| 21 | Democratic People's Republic of Korea | 2012 | 1.386802 | 0.833673 |
| 22 | Democratic People's Republic of Korea | 2013 | 1.371735 | 0.82762  |
| 23 | Democratic People's Republic of Korea | 2014 | 1.353179 | 0.81921  |
| 24 | Democratic People's Republic of Korea | 2015 | 1.335352 | 0.811898 |
| 25 | Democratic People's Republic of Korea | 2016 | 1.318845 | 0.806027 |
| 26 | Democratic People's Republic of Korea | 2017 | 1.307835 | 0.803468 |
| 27 | Democratic People's Republic of Korea | 2018 | 1.299564 | 0.802576 |
| 28 | Democratic People's Republic of Korea | 2019 | 1.295109 | 0.802939 |
| 29 | Democratic Republic of the Congo      | 1990 | 0.725667 | 0.623441 |
| 30 |                                       |      |          |          |
| 31 |                                       |      |          |          |
| 32 |                                       |      |          |          |
| 33 |                                       |      |          |          |
| 34 |                                       |      |          |          |
| 35 |                                       |      |          |          |
| 36 |                                       |      |          |          |
| 37 |                                       |      |          |          |
| 38 |                                       |      |          |          |
| 39 |                                       |      |          |          |
| 40 |                                       |      |          |          |
| 41 |                                       |      |          |          |
| 42 |                                       |      |          |          |
| 43 |                                       |      |          |          |
| 44 |                                       |      |          |          |
| 45 |                                       |      |          |          |
| 46 |                                       |      |          |          |

|                                  |      |          |          |
|----------------------------------|------|----------|----------|
| Democratic Republic of the Congo | 1991 | 0.740756 | 0.629281 |
| Democratic Republic of the Congo | 1992 | 0.75213  | 0.632608 |
| Democratic Republic of the Congo | 1993 | 0.766523 | 0.637728 |
| Democratic Republic of the Congo | 1994 | 0.77596  | 0.638698 |
| Democratic Republic of the Congo | 1995 | 0.783725 | 0.63836  |
| Democratic Republic of the Congo | 1996 | 0.809876 | 0.651945 |
| Democratic Republic of the Congo | 1997 | 0.808153 | 0.642786 |
| Democratic Republic of the Congo | 1998 | 0.825377 | 0.648066 |
| Democratic Republic of the Congo | 1999 | 0.839514 | 0.651081 |
| Democratic Republic of the Congo | 2000 | 0.857808 | 0.657211 |
| Democratic Republic of the Congo | 2001 | 0.880893 | 0.668343 |
| Democratic Republic of the Congo | 2002 | 0.900827 | 0.677205 |
| Democratic Republic of the Congo | 2003 | 0.915041 | 0.684614 |
| Democratic Republic of the Congo | 2004 | 0.928388 | 0.689952 |
| Democratic Republic of the Congo | 2005 | 0.935923 | 0.692857 |
| Democratic Republic of the Congo | 2006 | 0.938317 | 0.693584 |
| Democratic Republic of the Congo | 2007 | 0.934732 | 0.69219  |
| Democratic Republic of the Congo | 2008 | 0.927033 | 0.689089 |
| Democratic Republic of the Congo | 2009 | 0.92225  | 0.687671 |
| Democratic Republic of the Congo | 2010 | 0.913491 | 0.68321  |
| Democratic Republic of the Congo | 2011 | 0.903043 | 0.679241 |
| Democratic Republic of the Congo | 2012 | 0.896883 | 0.678318 |
| Democratic Republic of the Congo | 2013 | 0.889759 | 0.677695 |
| Democratic Republic of the Congo | 2014 | 0.884106 | 0.678253 |
| Democratic Republic of the Congo | 2015 | 0.885333 | 0.681047 |

|    |                                  |      |          |          |
|----|----------------------------------|------|----------|----------|
| 1  |                                  |      |          |          |
| 2  |                                  |      |          |          |
| 3  |                                  |      |          |          |
| 4  |                                  |      |          |          |
| 5  | Democratic Republic of the Congo | 2016 | 0.883509 | 0.685571 |
| 6  | Democratic Republic of the Congo | 2017 | 0.883648 | 0.690975 |
| 7  | Democratic Republic of the Congo | 2018 | 0.878558 | 0.693063 |
| 8  | Democratic Republic of the Congo | 2019 | 0.876196 | 0.69748  |
| 9  |                                  |      |          |          |
| 10 | Denmark                          | 1990 | 0.914828 | 0.580452 |
| 11 | Denmark                          | 1991 | 0.912012 | 0.572928 |
| 12 | Denmark                          | 1992 | 0.890685 | 0.554798 |
| 13 | Denmark                          | 1993 | 0.87468  | 0.544928 |
| 14 | Denmark                          | 1994 | 0.831742 | 0.522527 |
| 15 | Denmark                          | 1995 | 0.824691 | 0.520423 |
| 16 | Denmark                          | 1996 | 0.81649  | 0.514111 |
| 17 | Denmark                          | 1997 | 0.821561 | 0.517473 |
| 18 | Denmark                          | 1998 | 0.800373 | 0.502251 |
| 19 | Denmark                          | 1999 | 0.798478 | 0.504149 |
| 20 | Denmark                          | 2000 | 0.814684 | 0.504074 |
| 21 | Denmark                          | 2001 | 0.824117 | 0.502832 |
| 22 | Denmark                          | 2002 | 0.839073 | 0.506498 |
| 23 | Denmark                          | 2003 | 0.834985 | 0.501439 |
| 24 | Denmark                          | 2004 | 0.840014 | 0.504647 |
| 25 | Denmark                          | 2005 | 0.859294 | 0.51366  |
| 26 | Denmark                          | 2006 | 0.872854 | 0.519461 |
| 27 | Denmark                          | 2007 | 0.897032 | 0.531496 |
| 28 | Denmark                          | 2008 | 0.907035 | 0.535438 |
| 29 | Denmark                          | 2009 | 0.901804 | 0.534455 |
| 30 | Denmark                          | 2010 | 0.913237 | 0.543388 |
| 31 |                                  |      |          |          |
| 32 |                                  |      |          |          |
| 33 |                                  |      |          |          |
| 34 |                                  |      |          |          |
| 35 |                                  |      |          |          |
| 36 |                                  |      |          |          |
| 37 |                                  |      |          |          |
| 38 |                                  |      |          |          |
| 39 |                                  |      |          |          |
| 40 |                                  |      |          |          |
| 41 |                                  |      |          |          |
| 42 |                                  |      |          |          |
| 43 |                                  |      |          |          |
| 44 |                                  |      |          |          |
| 45 |                                  |      |          |          |
| 46 |                                  |      |          |          |

|          |      |          |          |
|----------|------|----------|----------|
| Denmark  | 2011 | 0.930847 | 0.55667  |
| Denmark  | 2012 | 0.925529 | 0.557666 |
| Denmark  | 2013 | 0.909819 | 0.55261  |
| Denmark  | 2014 | 0.911329 | 0.558367 |
| Denmark  | 2015 | 0.920682 | 0.572028 |
| Denmark  | 2016 | 0.891396 | 0.563705 |
| Denmark  | 2017 | 0.87517  | 0.562369 |
| Denmark  | 2018 | 0.856567 | 0.559299 |
| Denmark  | 2019 | 0.83897  | 0.555753 |
| Djibouti | 1990 | 0.63711  | 0.62949  |
| Djibouti | 1991 | 0.640369 | 0.623249 |
| Djibouti | 1992 | 0.633152 | 0.617298 |
| Djibouti | 1993 | 0.612619 | 0.606712 |
| Djibouti | 1994 | 0.606436 | 0.600977 |
| Djibouti | 1995 | 0.597126 | 0.597611 |
| Djibouti | 1996 | 0.591292 | 0.597983 |
| Djibouti | 1997 | 0.591939 | 0.603648 |
| Djibouti | 1998 | 0.589677 | 0.60793  |
| Djibouti | 1999 | 0.591275 | 0.614159 |
| Djibouti | 2000 | 0.589404 | 0.615726 |
| Djibouti | 2001 | 0.588645 | 0.619655 |
| Djibouti | 2002 | 0.588821 | 0.624743 |
| Djibouti | 2003 | 0.59524  | 0.632076 |
| Djibouti | 2004 | 0.600295 | 0.640742 |
| Djibouti | 2005 | 0.604165 | 0.646974 |

1  
2  
3  
4  
5  
6  
7  
8  
9  
10  
11  
12  
13  
14  
15  
16  
17  
18  
19  
20  
21  
22  
23  
24  
25  
26  
27  
28  
29  
30  
31  
32  
33  
34  
35  
36  
37  
38  
39  
40  
41  
42  
43  
44  
45  
46

|          |      |          |          |
|----------|------|----------|----------|
| Djibouti | 2006 | 0.607081 | 0.651123 |
| Djibouti | 2007 | 0.59813  | 0.646241 |
| Djibouti | 2008 | 0.592115 | 0.644566 |
| Djibouti | 2009 | 0.593195 | 0.649664 |
| Djibouti | 2010 | 0.596027 | 0.655453 |
| Djibouti | 2011 | 0.597782 | 0.661758 |
| Djibouti | 2012 | 0.601631 | 0.66921  |
| Djibouti | 2013 | 0.607341 | 0.678561 |
| Djibouti | 2014 | 0.609306 | 0.685456 |
| Djibouti | 2015 | 0.613572 | 0.691928 |
| Djibouti | 2016 | 0.616979 | 0.699061 |
| Djibouti | 2017 | 0.620938 | 0.707408 |
| Djibouti | 2018 | 0.622501 | 0.713307 |
| Djibouti | 2019 | 0.623897 | 0.718761 |
| Dominica | 1990 | 1.022575 | 0.68341  |
| Dominica | 1991 | 1.030748 | 0.681536 |
| Dominica | 1992 | 0.966633 | 0.635319 |
| Dominica | 1993 | 0.955614 | 0.621836 |
| Dominica | 1994 | 0.967154 | 0.623203 |
| Dominica | 1995 | 0.971693 | 0.621751 |
| Dominica | 1996 | 0.982772 | 0.625897 |
| Dominica | 1997 | 0.995791 | 0.633172 |
| Dominica | 1998 | 1.014203 | 0.645226 |
| Dominica | 1999 | 1.07042  | 0.681689 |
| Dominica | 2000 | 1.106362 | 0.706969 |

|                    |      |          |          |
|--------------------|------|----------|----------|
| Dominica           | 2001 | 1.133138 | 0.731554 |
| Dominica           | 2002 | 1.144745 | 0.752951 |
| Dominica           | 2003 | 1.130896 | 0.76167  |
| Dominica           | 2004 | 1.100279 | 0.756289 |
| Dominica           | 2005 | 1.098023 | 0.757618 |
| Dominica           | 2006 | 1.097205 | 0.766254 |
| Dominica           | 2007 | 1.086021 | 0.768361 |
| Dominica           | 2008 | 1.059714 | 0.765443 |
| Dominica           | 2009 | 1.039281 | 0.764358 |
| Dominica           | 2010 | 1.017251 | 0.762748 |
| Dominica           | 2011 | 1.00979  | 0.773488 |
| Dominica           | 2012 | 0.988291 | 0.776944 |
| Dominica           | 2013 | 0.972341 | 0.779038 |
| Dominica           | 2014 | 0.951066 | 0.776249 |
| Dominica           | 2015 | 0.929208 | 0.769479 |
| Dominica           | 2016 | 0.924913 | 0.775782 |
| Dominica           | 2017 | 0.916874 | 0.778058 |
| Dominica           | 2018 | 0.909062 | 0.779735 |
| Dominica           | 2019 | 0.902622 | 0.781262 |
| Dominican Republic | 1990 | 0.792257 | 0.775078 |
| Dominican Republic | 1991 | 0.813805 | 0.79193  |
| Dominican Republic | 1992 | 0.834425 | 0.808714 |
| Dominican Republic | 1993 | 0.867692 | 0.836164 |
| Dominican Republic | 1994 | 0.831727 | 0.799803 |
| Dominican Republic | 1995 | 0.788926 | 0.756014 |

|                    |      |          |          |
|--------------------|------|----------|----------|
| Dominican Republic | 1996 | 0.750525 | 0.710374 |
| Dominican Republic | 1997 | 0.727226 | 0.680711 |
| Dominican Republic | 1998 | 0.704717 | 0.653237 |
| Dominican Republic | 1999 | 0.655838 | 0.600255 |
| Dominican Republic | 2000 | 0.667709 | 0.608755 |
| Dominican Republic | 2001 | 0.683421 | 0.621056 |
| Dominican Republic | 2002 | 0.672707 | 0.608319 |
| Dominican Republic | 2003 | 0.688722 | 0.619241 |
| Dominican Republic | 2004 | 0.716078 | 0.641397 |
| Dominican Republic | 2005 | 0.748373 | 0.669059 |
| Dominican Republic | 2006 | 0.755305 | 0.675231 |
| Dominican Republic | 2007 | 0.762239 | 0.680346 |
| Dominican Republic | 2008 | 0.776457 | 0.691661 |
| Dominican Republic | 2009 | 0.795809 | 0.710386 |
| Dominican Republic | 2010 | 0.808009 | 0.727011 |
| Dominican Republic | 2011 | 0.795596 | 0.723439 |
| Dominican Republic | 2012 | 0.780869 | 0.71514  |
| Dominican Republic | 2013 | 0.77778  | 0.715245 |
| Dominican Republic | 2014 | 0.790124 | 0.729196 |
| Dominican Republic | 2015 | 0.802808 | 0.741573 |
| Dominican Republic | 2016 | 0.815963 | 0.755204 |
| Dominican Republic | 2017 | 0.835907 | 0.773302 |
| Dominican Republic | 2018 | 0.852982 | 0.787151 |
| Dominican Republic | 2019 | 0.867118 | 0.7988   |
| Ecuador            | 1990 | 1.004058 | 1.011805 |

|         |      |          |          |
|---------|------|----------|----------|
| Ecuador | 1991 | 0.968923 | 0.969688 |
| Ecuador | 1992 | 1.003831 | 0.998713 |
| Ecuador | 1993 | 0.991662 | 0.981519 |
| Ecuador | 1994 | 0.975175 | 0.96323  |
| Ecuador | 1995 | 0.969265 | 0.958788 |
| Ecuador | 1996 | 0.955254 | 0.945169 |
| Ecuador | 1997 | 0.963522 | 0.948701 |
| Ecuador | 1998 | 0.952234 | 0.929045 |
| Ecuador | 1999 | 0.923097 | 0.898357 |
| Ecuador | 2000 | 0.945688 | 0.918728 |
| Ecuador | 2001 | 0.850152 | 0.82902  |
| Ecuador | 2002 | 0.961827 | 0.929527 |
| Ecuador | 2003 | 1.002522 | 0.961998 |
| Ecuador | 2004 | 0.951695 | 0.910259 |
| Ecuador | 2005 | 0.933601 | 0.891627 |
| Ecuador | 2006 | 0.935124 | 0.891747 |
| Ecuador | 2007 | 0.923045 | 0.875347 |
| Ecuador | 2008 | 0.908829 | 0.848903 |
| Ecuador | 2009 | 0.909745 | 0.838831 |
| Ecuador | 2010 | 0.905887 | 0.830621 |
| Ecuador | 2011 | 0.872038 | 0.795452 |
| Ecuador | 2012 | 0.948539 | 0.857824 |
| Ecuador | 2013 | 0.954923 | 0.857567 |
| Ecuador | 2014 | 0.945461 | 0.846159 |
| Ecuador | 2015 | 0.933084 | 0.834753 |



1  
2  
3  
4  
5  
6  
7  
8  
9  
10  
11  
12  
13  
14  
15  
16  
17  
18  
19  
20  
21  
22  
23  
24  
25  
26  
27  
28  
29  
30  
31  
32  
33  
34  
35  
36  
37  
38  
39  
40  
41  
42  
43  
44  
45  
46

|         |      |          |          |
|---------|------|----------|----------|
| Ecuador | 2016 | 0.940996 | 0.838891 |
| Ecuador | 2017 | 0.946693 | 0.839503 |
| Ecuador | 2018 | 0.958062 | 0.848115 |
| Ecuador | 2019 | 0.982864 | 0.871573 |
| Egypt   | 1990 | 1.352837 | 1.300901 |
| Egypt   | 1991 | 1.345168 | 1.317427 |
| Egypt   | 1992 | 1.356801 | 1.35033  |
| Egypt   | 1993 | 1.359543 | 1.369332 |
| Egypt   | 1994 | 1.336761 | 1.356111 |
| Egypt   | 1995 | 1.314426 | 1.347094 |
| Egypt   | 1996 | 1.356722 | 1.410277 |
| Egypt   | 1997 | 1.367379 | 1.441698 |
| Egypt   | 1998 | 1.367158 | 1.459711 |
| Egypt   | 1999 | 1.357297 | 1.482505 |
| Egypt   | 2000 | 1.355486 | 1.547564 |
| Egypt   | 2001 | 1.340398 | 1.572534 |
| Egypt   | 2002 | 1.300644 | 1.537725 |
| Egypt   | 2003 | 1.241502 | 1.444409 |
| Egypt   | 2004 | 1.231767 | 1.42514  |
| Egypt   | 2005 | 1.259757 | 1.48129  |
| Egypt   | 2006 | 1.273849 | 1.56127  |
| Egypt   | 2007 | 1.241724 | 1.559132 |
| Egypt   | 2008 | 1.2281   | 1.558302 |
| Egypt   | 2009 | 1.221783 | 1.566194 |
| Egypt   | 2010 | 1.223014 | 1.588974 |

|             |      |          |          |
|-------------|------|----------|----------|
| Egypt       | 2011 | 1.166152 | 1.543971 |
| Egypt       | 2012 | 1.181251 | 1.56277  |
| Egypt       | 2013 | 1.128811 | 1.5249   |
| Egypt       | 2014 | 1.142337 | 1.587852 |
| Egypt       | 2015 | 1.165619 | 1.642986 |
| Egypt       | 2016 | 1.160821 | 1.652987 |
| Egypt       | 2017 | 1.148174 | 1.63138  |
| Egypt       | 2018 | 1.137364 | 1.622527 |
| Egypt       | 2019 | 1.124721 | 1.598394 |
| El Salvador | 1990 | 0.73088  | 0.628185 |
| El Salvador | 1991 | 0.70667  | 0.605372 |
| El Salvador | 1992 | 0.706118 | 0.602843 |
| El Salvador | 1993 | 0.690439 | 0.588379 |
| El Salvador | 1994 | 0.691847 | 0.586128 |
| El Salvador | 1995 | 0.625846 | 0.525309 |
| El Salvador | 1996 | 0.678738 | 0.566622 |
| El Salvador | 1997 | 0.642916 | 0.534002 |
| El Salvador | 1998 | 0.567219 | 0.466982 |
| El Salvador | 1999 | 0.592851 | 0.484268 |
| El Salvador | 2000 | 0.547509 | 0.443736 |
| El Salvador | 2001 | 0.570958 | 0.459772 |
| El Salvador | 2002 | 0.57284  | 0.458034 |
| El Salvador | 2003 | 0.540174 | 0.428803 |
| El Salvador | 2004 | 0.519341 | 0.408988 |
| El Salvador | 2005 | 0.506918 | 0.396288 |

1  
2  
3  
4  
5  
6  
7  
8  
9  
10  
11  
12  
13  
14  
15  
16  
17  
18  
19  
20  
21  
22  
23  
24  
25  
26  
27  
28  
29  
30  
31  
32  
33  
34  
35  
36  
37  
38  
39  
40  
41  
42  
43  
44  
45  
46

|                   |      |          |          |
|-------------------|------|----------|----------|
| El Salvador       | 2006 | 0.491691 | 0.381601 |
| El Salvador       | 2007 | 0.506517 | 0.390121 |
| El Salvador       | 2008 | 0.5161   | 0.394159 |
| El Salvador       | 2009 | 0.523686 | 0.396446 |
| El Salvador       | 2010 | 0.551921 | 0.415391 |
| El Salvador       | 2011 | 0.554047 | 0.414798 |
| El Salvador       | 2012 | 0.581725 | 0.432742 |
| El Salvador       | 2013 | 0.60464  | 0.447815 |
| El Salvador       | 2014 | 0.563794 | 0.416177 |
| El Salvador       | 2015 | 0.565509 | 0.415662 |
| El Salvador       | 2016 | 0.560112 | 0.409023 |
| El Salvador       | 2017 | 0.573525 | 0.415772 |
| El Salvador       | 2018 | 0.589898 | 0.425152 |
| El Salvador       | 2019 | 0.588189 | 0.420935 |
| Equatorial Guinea | 1990 | 0.633973 | 0.475046 |
| Equatorial Guinea | 1991 | 0.643732 | 0.476437 |
| Equatorial Guinea | 1992 | 0.648953 | 0.474689 |
| Equatorial Guinea | 1993 | 0.667183 | 0.482076 |
| Equatorial Guinea | 1994 | 0.685891 | 0.489868 |
| Equatorial Guinea | 1995 | 0.695666 | 0.493196 |
| Equatorial Guinea | 1996 | 0.719499 | 0.505742 |
| Equatorial Guinea | 1997 | 0.726417 | 0.506651 |
| Equatorial Guinea | 1998 | 0.743037 | 0.514358 |
| Equatorial Guinea | 1999 | 0.75764  | 0.522421 |
| Equatorial Guinea | 2000 | 0.771162 | 0.530608 |

|                   |      |          |          |
|-------------------|------|----------|----------|
| Equatorial Guinea | 2001 | 0.78625  | 0.541806 |
| Equatorial Guinea | 2002 | 0.813222 | 0.560839 |
| Equatorial Guinea | 2003 | 0.844645 | 0.586309 |
| Equatorial Guinea | 2004 | 0.864957 | 0.605754 |
| Equatorial Guinea | 2005 | 0.883082 | 0.624017 |
| Equatorial Guinea | 2006 | 0.89857  | 0.641249 |
| Equatorial Guinea | 2007 | 0.903298 | 0.651933 |
| Equatorial Guinea | 2008 | 0.921692 | 0.668859 |
| Equatorial Guinea | 2009 | 0.937131 | 0.689382 |
| Equatorial Guinea | 2010 | 0.954428 | 0.707902 |
| Equatorial Guinea | 2011 | 0.94896  | 0.713287 |
| Equatorial Guinea | 2012 | 0.934341 | 0.710454 |
| Equatorial Guinea | 2013 | 0.911668 | 0.701174 |
| Equatorial Guinea | 2014 | 0.904311 | 0.702942 |
| Equatorial Guinea | 2015 | 0.913769 | 0.712517 |
| Equatorial Guinea | 2016 | 0.908977 | 0.71704  |
| Equatorial Guinea | 2017 | 0.899726 | 0.715847 |
| Equatorial Guinea | 2018 | 0.895166 | 0.716091 |
| Equatorial Guinea | 2019 | 0.892762 | 0.716859 |
| Eritrea           | 1990 | 0.677516 | 0.486014 |
| Eritrea           | 1991 | 0.66837  | 0.481683 |
| Eritrea           | 1992 | 0.653672 | 0.476384 |
| Eritrea           | 1993 | 0.635299 | 0.468895 |
| Eritrea           | 1994 | 0.617765 | 0.463212 |
| Eritrea           | 1995 | 0.585629 | 0.44997  |

1  
2  
3  
4  
5  
6  
7  
8  
9  
10  
11  
12  
13  
14  
15  
16  
17  
18  
19  
20  
21  
22  
23  
24  
25  
26  
27  
28  
29  
30  
31  
32  
33  
34  
35  
36  
37  
38  
39  
40  
41  
42  
43  
44  
45  
46

|         |      |          |          |
|---------|------|----------|----------|
| Eritrea | 1996 | 0.592799 | 0.455702 |
| Eritrea | 1997 | 0.604464 | 0.46541  |
| Eritrea | 1998 | 0.622404 | 0.477271 |
| Eritrea | 1999 | 0.635233 | 0.488692 |
| Eritrea | 2000 | 0.652666 | 0.502612 |
| Eritrea | 2001 | 0.672426 | 0.51557  |
| Eritrea | 2002 | 0.682087 | 0.528655 |
| Eritrea | 2003 | 0.696141 | 0.540144 |
| Eritrea | 2004 | 0.706811 | 0.548242 |
| Eritrea | 2005 | 0.717387 | 0.555826 |
| Eritrea | 2006 | 0.721666 | 0.559545 |
| Eritrea | 2007 | 0.726562 | 0.563659 |
| Eritrea | 2008 | 0.729562 | 0.567179 |
| Eritrea | 2009 | 0.733471 | 0.571313 |
| Eritrea | 2010 | 0.736993 | 0.57369  |
| Eritrea | 2011 | 0.747012 | 0.581633 |
| Eritrea | 2012 | 0.75857  | 0.592977 |
| Eritrea | 2013 | 0.770296 | 0.603493 |
| Eritrea | 2014 | 0.780923 | 0.612417 |
| Eritrea | 2015 | 0.787631 | 0.620088 |
| Eritrea | 2016 | 0.794511 | 0.628143 |
| Eritrea | 2017 | 0.800615 | 0.636744 |
| Eritrea | 2018 | 0.801815 | 0.641395 |
| Eritrea | 2019 | 0.803849 | 0.647501 |
| Estonia | 1990 | 1.274667 | 0.544356 |

|    |         |      |          |          |
|----|---------|------|----------|----------|
| 1  |         |      |          |          |
| 2  |         |      |          |          |
| 3  |         |      |          |          |
| 4  |         |      |          |          |
| 5  | Estonia | 1991 | 1.290002 | 0.556613 |
| 6  | Estonia | 1992 | 1.239721 | 0.541388 |
| 7  | Estonia | 1993 | 1.200974 | 0.542798 |
| 8  | Estonia | 1994 | 1.151173 | 0.550592 |
| 9  | Estonia | 1995 | 1.128166 | 0.54486  |
| 10 | Estonia | 1996 | 1.176935 | 0.562217 |
| 11 | Estonia | 1997 | 1.14876  | 0.552321 |
| 12 | Estonia | 1998 | 1.1261   | 0.544524 |
| 13 | Estonia | 1999 | 1.166972 | 0.555235 |
| 14 | Estonia | 2000 | 1.255561 | 0.597795 |
| 15 | Estonia | 2001 | 1.252541 | 0.599208 |
| 16 | Estonia | 2002 | 1.205019 | 0.568907 |
| 17 | Estonia | 2003 | 1.249495 | 0.580201 |
| 18 | Estonia | 2004 | 1.197993 | 0.548705 |
| 19 | Estonia | 2005 | 1.175965 | 0.531529 |
| 20 | Estonia | 2006 | 1.137999 | 0.513165 |
| 21 | Estonia | 2007 | 1.110521 | 0.499568 |
| 22 | Estonia | 2008 | 1.187032 | 0.526966 |
| 23 | Estonia | 2009 | 1.18254  | 0.520329 |
| 24 | Estonia | 2010 | 1.25962  | 0.543306 |
| 25 | Estonia | 2011 | 1.367921 | 0.587629 |
| 26 | Estonia | 2012 | 1.43354  | 0.605071 |
| 27 | Estonia | 2013 | 1.638015 | 0.678218 |
| 28 | Estonia | 2014 | 1.681019 | 0.688145 |
| 29 | Estonia | 2015 | 1.90245  | 0.76673  |
| 30 |         |      |          |          |
| 31 |         |      |          |          |
| 32 |         |      |          |          |
| 33 |         |      |          |          |
| 34 |         |      |          |          |
| 35 |         |      |          |          |
| 36 |         |      |          |          |
| 37 |         |      |          |          |
| 38 |         |      |          |          |
| 39 |         |      |          |          |
| 40 |         |      |          |          |
| 41 |         |      |          |          |
| 42 |         |      |          |          |
| 43 |         |      |          |          |
| 44 |         |      |          |          |
| 45 |         |      |          |          |
| 46 |         |      |          |          |

1  
2  
3  
4  
5  
6  
7  
8  
9  
10  
11  
12  
13  
14  
15  
16  
17  
18  
19  
20  
21  
22  
23  
24  
25  
26  
27  
28  
29  
30  
31  
32  
33  
34  
35  
36  
37  
38  
39  
40  
41  
42  
43  
44  
45  
46

|          |      |          |          |
|----------|------|----------|----------|
| Estonia  | 2016 | 1.966618 | 0.787203 |
| Estonia  | 2017 | 1.978323 | 0.797514 |
| Estonia  | 2018 | 1.945837 | 0.792401 |
| Estonia  | 2019 | 1.91689  | 0.789282 |
| Eswatini | 1990 | 0.643432 | 0.445885 |
| Eswatini | 1991 | 0.655902 | 0.454929 |
| Eswatini | 1992 | 0.663034 | 0.459787 |
| Eswatini | 1993 | 0.659477 | 0.458163 |
| Eswatini | 1994 | 0.641934 | 0.450227 |
| Eswatini | 1995 | 0.629765 | 0.446376 |
| Eswatini | 1996 | 0.592986 | 0.428342 |
| Eswatini | 1997 | 0.575288 | 0.419633 |
| Eswatini | 1998 | 0.56769  | 0.418709 |
| Eswatini | 1999 | 0.58138  | 0.430021 |
| Eswatini | 2000 | 0.615204 | 0.455989 |
| Eswatini | 2001 | 0.622836 | 0.464538 |
| Eswatini | 2002 | 0.648366 | 0.482734 |
| Eswatini | 2003 | 0.645587 | 0.482052 |
| Eswatini | 2004 | 0.637776 | 0.475359 |
| Eswatini | 2005 | 0.637936 | 0.473051 |
| Eswatini | 2006 | 0.619484 | 0.459317 |
| Eswatini | 2007 | 0.596666 | 0.442398 |
| Eswatini | 2008 | 0.56799  | 0.420904 |
| Eswatini | 2009 | 0.549777 | 0.405457 |
| Eswatini | 2010 | 0.532729 | 0.390103 |

|    |          |      |          |          |
|----|----------|------|----------|----------|
| 1  |          |      |          |          |
| 2  |          |      |          |          |
| 3  |          |      |          |          |
| 4  |          |      |          |          |
| 5  | Eswatini | 2011 | 0.519468 | 0.377501 |
| 6  | Eswatini | 2012 | 0.512695 | 0.369766 |
| 7  | Eswatini | 2013 | 0.511534 | 0.36584  |
| 8  | Eswatini | 2014 | 0.513582 | 0.364059 |
| 9  | Eswatini | 2015 | 0.512443 | 0.360656 |
| 10 | Eswatini | 2016 | 0.510467 | 0.35706  |
| 11 | Eswatini | 2017 | 0.514681 | 0.357329 |
| 12 | Eswatini | 2018 | 0.519338 | 0.357931 |
| 13 | Eswatini | 2019 | 0.524167 | 0.358968 |
| 14 | Ethiopia | 1990 | 0.720756 | 0.703844 |
| 15 | Ethiopia | 1991 | 0.715509 | 0.706314 |
| 16 | Ethiopia | 1992 | 0.718831 | 0.717897 |
| 17 | Ethiopia | 1993 | 0.720067 | 0.728498 |
| 18 | Ethiopia | 1994 | 0.721361 | 0.73772  |
| 19 | Ethiopia | 1995 | 0.720699 | 0.743548 |
| 20 | Ethiopia | 1996 | 0.720125 | 0.749094 |
| 21 | Ethiopia | 1997 | 0.718258 | 0.753969 |
| 22 | Ethiopia | 1998 | 0.724515 | 0.767056 |
| 23 | Ethiopia | 1999 | 0.728246 | 0.775891 |
| 24 | Ethiopia | 2000 | 0.71538  | 0.766805 |
| 25 | Ethiopia | 2001 | 0.705973 | 0.758366 |
| 26 | Ethiopia | 2002 | 0.699858 | 0.754009 |
| 27 | Ethiopia | 2003 | 0.692711 | 0.749821 |
| 28 | Ethiopia | 2004 | 0.689158 | 0.749999 |
| 29 | Ethiopia | 2005 | 0.690604 | 0.752846 |
| 30 |          |      |          |          |
| 31 |          |      |          |          |
| 32 |          |      |          |          |
| 33 |          |      |          |          |
| 34 |          |      |          |          |
| 35 |          |      |          |          |
| 36 |          |      |          |          |
| 37 |          |      |          |          |
| 38 |          |      |          |          |
| 39 |          |      |          |          |
| 40 |          |      |          |          |
| 41 |          |      |          |          |
| 42 |          |      |          |          |
| 43 |          |      |          |          |
| 44 |          |      |          |          |
| 45 |          |      |          |          |
| 46 |          |      |          |          |



1  
2  
3  
4  
5  
6  
7  
8  
9  
10  
11  
12  
13  
14  
15  
16  
17  
18  
19  
20  
21  
22  
23  
24  
25  
26  
27  
28  
29  
30  
31  
32  
33  
34  
35  
36  
37  
38  
39  
40  
41  
42  
43  
44  
45  
46

|          |      |          |          |
|----------|------|----------|----------|
| Ethiopia | 2006 | 0.682452 | 0.745788 |
| Ethiopia | 2007 | 0.671544 | 0.734216 |
| Ethiopia | 2008 | 0.659778 | 0.722532 |
| Ethiopia | 2009 | 0.65182  | 0.715305 |
| Ethiopia | 2010 | 0.643618 | 0.708825 |
| Ethiopia | 2011 | 0.641285 | 0.705564 |
| Ethiopia | 2012 | 0.633994 | 0.697198 |
| Ethiopia | 2013 | 0.62824  | 0.691475 |
| Ethiopia | 2014 | 0.626243 | 0.687038 |
| Ethiopia | 2015 | 0.625936 | 0.68562  |
| Ethiopia | 2016 | 0.629331 | 0.686995 |
| Ethiopia | 2017 | 0.638242 | 0.693243 |
| Ethiopia | 2018 | 0.645523 | 0.699145 |
| Ethiopia | 2019 | 0.651966 | 0.705008 |
| Fiji     | 1990 | 0.73655  | 0.628208 |
| Fiji     | 1991 | 0.723556 | 0.608009 |
| Fiji     | 1992 | 0.714756 | 0.592527 |
| Fiji     | 1993 | 0.705691 | 0.578871 |
| Fiji     | 1994 | 0.69546  | 0.563871 |
| Fiji     | 1995 | 0.691654 | 0.557138 |
| Fiji     | 1996 | 0.700723 | 0.561307 |
| Fiji     | 1997 | 0.704771 | 0.562422 |
| Fiji     | 1998 | 0.706182 | 0.563969 |
| Fiji     | 1999 | 0.687221 | 0.548343 |
| Fiji     | 2000 | 0.689676 | 0.54438  |

|         |      |          |          |
|---------|------|----------|----------|
| Fiji    | 2001 | 0.674743 | 0.523954 |
| Fiji    | 2002 | 0.714503 | 0.533768 |
| Fiji    | 2003 | 0.766211 | 0.56517  |
| Fiji    | 2004 | 0.772718 | 0.564366 |
| Fiji    | 2005 | 0.738173 | 0.546633 |
| Fiji    | 2006 | 0.729158 | 0.534349 |
| Fiji    | 2007 | 0.744471 | 0.528667 |
| Fiji    | 2008 | 0.779592 | 0.571697 |
| Fiji    | 2009 | 0.799191 | 0.589837 |
| Fiji    | 2010 | 0.774052 | 0.569211 |
| Fiji    | 2011 | 0.744256 | 0.551047 |
| Fiji    | 2012 | 0.721319 | 0.541473 |
| Fiji    | 2013 | 0.719478 | 0.54105  |
| Fiji    | 2014 | 0.721526 | 0.53809  |
| Fiji    | 2015 | 0.728084 | 0.540392 |
| Fiji    | 2016 | 0.734806 | 0.543516 |
| Fiji    | 2017 | 0.741654 | 0.545391 |
| Fiji    | 2018 | 0.748133 | 0.547693 |
| Fiji    | 2019 | 0.754193 | 0.549577 |
| Finland | 1990 | 1.369762 | 0.651588 |
| Finland | 1991 | 1.404089 | 0.664806 |
| Finland | 1992 | 1.447397 | 0.683359 |
| Finland | 1993 | 1.473253 | 0.693502 |
| Finland | 1994 | 1.479108 | 0.699452 |
| Finland | 1995 | 1.437902 | 0.685172 |

|    |         |      |          |          |
|----|---------|------|----------|----------|
| 1  |         |      |          |          |
| 2  |         |      |          |          |
| 3  |         |      |          |          |
| 4  |         |      |          |          |
| 5  | Finland | 1996 | 1.4051   | 0.675676 |
| 6  | Finland | 1997 | 1.369332 | 0.663419 |
| 7  | Finland | 1998 | 1.273109 | 0.620794 |
| 8  | Finland | 1999 | 1.23956  | 0.605483 |
| 9  | Finland | 2000 | 1.255896 | 0.613356 |
| 10 | Finland | 2001 | 1.225525 | 0.599665 |
| 11 | Finland | 2002 | 1.211362 | 0.593411 |
| 12 | Finland | 2003 | 1.235058 | 0.606439 |
| 13 | Finland | 2004 | 1.240611 | 0.615839 |
| 14 | Finland | 2005 | 1.268837 | 0.630773 |
| 15 | Finland | 2006 | 1.315871 | 0.655994 |
| 16 | Finland | 2007 | 1.334793 | 0.667858 |
| 17 | Finland | 2008 | 1.346856 | 0.675729 |
| 18 | Finland | 2009 | 1.349785 | 0.681902 |
| 19 | Finland | 2010 | 1.368822 | 0.693519 |
| 20 | Finland | 2011 | 1.41426  | 0.719419 |
| 21 | Finland | 2012 | 1.442101 | 0.737073 |
| 22 | Finland | 2013 | 1.456253 | 0.75094  |
| 23 | Finland | 2014 | 1.463376 | 0.761748 |
| 24 | Finland | 2015 | 1.504316 | 0.790889 |
| 25 | Finland | 2016 | 1.486986 | 0.792614 |
| 26 | Finland | 2017 | 1.435595 | 0.779339 |
| 27 | Finland | 2018 | 1.41599  | 0.781929 |
| 28 | Finland | 2019 | 1.386159 | 0.777876 |
| 29 | France  | 1990 | 1.124202 | 0.523527 |
| 30 |         |      |          |          |
| 31 |         |      |          |          |
| 32 |         |      |          |          |
| 33 |         |      |          |          |
| 34 |         |      |          |          |
| 35 |         |      |          |          |
| 36 |         |      |          |          |
| 37 |         |      |          |          |
| 38 |         |      |          |          |
| 39 |         |      |          |          |
| 40 |         |      |          |          |
| 41 |         |      |          |          |
| 42 |         |      |          |          |
| 43 |         |      |          |          |
| 44 |         |      |          |          |
| 45 |         |      |          |          |
| 46 |         |      |          |          |

|    |        |      |          |          |
|----|--------|------|----------|----------|
| 1  |        |      |          |          |
| 2  |        |      |          |          |
| 3  |        |      |          |          |
| 4  |        |      |          |          |
| 5  | France | 1991 | 1.122316 | 0.524504 |
| 6  | France | 1992 | 1.12034  | 0.524787 |
| 7  | France | 1993 | 1.117802 | 0.526191 |
| 8  | France | 1994 | 1.118268 | 0.528797 |
| 9  | France | 1995 | 1.112993 | 0.527024 |
| 10 | France | 1996 | 1.101909 | 0.522307 |
| 11 | France | 1997 | 1.105504 | 0.522596 |
| 12 | France | 1998 | 1.107177 | 0.530535 |
| 13 | France | 1999 | 1.10903  | 0.534938 |
| 14 | France | 2000 | 1.107854 | 0.537168 |
| 15 | France | 2001 | 1.110105 | 0.543565 |
| 16 | France | 2002 | 1.102    | 0.545481 |
| 17 | France | 2003 | 1.084393 | 0.542172 |
| 18 | France | 2004 | 1.077414 | 0.54228  |
| 19 | France | 2005 | 1.06193  | 0.535116 |
| 20 | France | 2006 | 1.067723 | 0.539183 |
| 21 | France | 2007 | 1.075779 | 0.545688 |
| 22 | France | 2008 | 1.090466 | 0.555471 |
| 23 | France | 2009 | 1.07957  | 0.551918 |
| 24 | France | 2010 | 1.086085 | 0.553398 |
| 25 | France | 2011 | 1.095191 | 0.55705  |
| 26 | France | 2012 | 1.104754 | 0.562202 |
| 27 | France | 2013 | 1.102879 | 0.564467 |
| 28 | France | 2014 | 1.10743  | 0.570799 |
| 29 | France | 2015 | 1.089102 | 0.563704 |
| 30 |        |      |          |          |
| 31 |        |      |          |          |
| 32 |        |      |          |          |
| 33 |        |      |          |          |
| 34 |        |      |          |          |
| 35 |        |      |          |          |
| 36 |        |      |          |          |
| 37 |        |      |          |          |
| 38 |        |      |          |          |
| 39 |        |      |          |          |
| 40 |        |      |          |          |
| 41 |        |      |          |          |
| 42 |        |      |          |          |
| 43 |        |      |          |          |
| 44 |        |      |          |          |
| 45 |        |      |          |          |
| 46 |        |      |          |          |

1  
2  
3  
4  
5  
6  
7  
8  
9  
10  
11  
12  
13  
14  
15  
16  
17  
18  
19  
20  
21  
22  
23  
24  
25  
26  
27  
28  
29  
30  
31  
32  
33  
34  
35  
36  
37  
38  
39  
40  
41  
42  
43  
44  
45  
46

|        |      |          |          |
|--------|------|----------|----------|
| France | 2016 | 1.076047 | 0.555978 |
| France | 2017 | 1.062053 | 0.548646 |
| France | 2018 | 1.078987 | 0.558974 |
| France | 2019 | 1.072237 | 0.558669 |
| Gabon  | 1990 | 0.663018 | 0.510695 |
| Gabon  | 1991 | 0.671655 | 0.519702 |
| Gabon  | 1992 | 0.671388 | 0.52192  |
| Gabon  | 1993 | 0.685336 | 0.532449 |
| Gabon  | 1994 | 0.707166 | 0.549661 |
| Gabon  | 1995 | 0.711069 | 0.555824 |
| Gabon  | 1996 | 0.747609 | 0.582971 |
| Gabon  | 1997 | 0.769173 | 0.598567 |
| Gabon  | 1998 | 0.796265 | 0.617671 |
| Gabon  | 1999 | 0.831864 | 0.641644 |
| Gabon  | 2000 | 0.848369 | 0.653986 |
| Gabon  | 2001 | 0.876541 | 0.676621 |
| Gabon  | 2002 | 0.887885 | 0.685029 |
| Gabon  | 2003 | 0.917659 | 0.709144 |
| Gabon  | 2004 | 0.940511 | 0.72639  |
| Gabon  | 2005 | 0.941471 | 0.727273 |
| Gabon  | 2006 | 0.957229 | 0.739157 |
| Gabon  | 2007 | 0.939534 | 0.730543 |
| Gabon  | 2008 | 0.943992 | 0.736346 |
| Gabon  | 2009 | 0.937137 | 0.731371 |
| Gabon  | 2010 | 0.928266 | 0.72189  |

|    |        |      |          |          |
|----|--------|------|----------|----------|
| 1  |        |      |          |          |
| 2  |        |      |          |          |
| 3  |        |      |          |          |
| 4  |        |      |          |          |
| 5  | Gabon  | 2011 | 0.931747 | 0.725053 |
| 6  | Gabon  | 2012 | 0.920242 | 0.718091 |
| 7  | Gabon  | 2013 | 0.907997 | 0.709801 |
| 8  | Gabon  | 2014 | 0.913089 | 0.712937 |
| 9  | Gabon  | 2015 | 0.921649 | 0.71807  |
| 10 | Gabon  | 2016 | 0.920729 | 0.721385 |
| 11 | Gabon  | 2017 | 0.921713 | 0.725495 |
| 12 | Gabon  | 2018 | 0.922917 | 0.729617 |
| 13 | Gabon  | 2019 | 0.923103 | 0.73276  |
| 14 | Gambia | 1990 | 0.755805 | 0.755747 |
| 15 | Gambia | 1991 | 0.756823 | 0.756088 |
| 16 | Gambia | 1992 | 0.758184 | 0.75924  |
| 17 | Gambia | 1993 | 0.758936 | 0.757261 |
| 18 | Gambia | 1994 | 0.755326 | 0.750572 |
| 19 | Gambia | 1995 | 0.753686 | 0.753222 |
| 20 | Gambia | 1996 | 0.751364 | 0.743599 |
| 21 | Gambia | 1997 | 0.749738 | 0.739091 |
| 22 | Gambia | 1998 | 0.750354 | 0.73916  |
| 23 | Gambia | 1999 | 0.743484 | 0.732456 |
| 24 | Gambia | 2000 | 0.74646  | 0.72468  |
| 25 | Gambia | 2001 | 0.746679 | 0.717698 |
| 26 | Gambia | 2002 | 0.747766 | 0.711503 |
| 27 | Gambia | 2003 | 0.752355 | 0.712861 |
| 28 | Gambia | 2004 | 0.755842 | 0.713817 |
| 29 | Gambia | 2005 | 0.755955 | 0.71042  |
| 30 |        |      |          |          |
| 31 |        |      |          |          |
| 32 |        |      |          |          |
| 33 |        |      |          |          |
| 34 |        |      |          |          |
| 35 |        |      |          |          |
| 36 |        |      |          |          |
| 37 |        |      |          |          |
| 38 |        |      |          |          |
| 39 |        |      |          |          |
| 40 |        |      |          |          |
| 41 |        |      |          |          |
| 42 |        |      |          |          |
| 43 |        |      |          |          |
| 44 |        |      |          |          |
| 45 |        |      |          |          |
| 46 |        |      |          |          |

|         |      |          |          |
|---------|------|----------|----------|
| Gambia  | 2006 | 0.757416 | 0.705952 |
| Gambia  | 2007 | 0.75523  | 0.700773 |
| Gambia  | 2008 | 0.754458 | 0.692666 |
| Gambia  | 2009 | 0.752537 | 0.689476 |
| Gambia  | 2010 | 0.753068 | 0.686471 |
| Gambia  | 2011 | 0.755772 | 0.679598 |
| Gambia  | 2012 | 0.759236 | 0.680795 |
| Gambia  | 2013 | 0.756697 | 0.679521 |
| Gambia  | 2014 | 0.763619 | 0.690755 |
| Gambia  | 2015 | 0.769482 | 0.692325 |
| Gambia  | 2016 | 0.773885 | 0.699811 |
| Gambia  | 2017 | 0.778738 | 0.706126 |
| Gambia  | 2018 | 0.781179 | 0.70658  |
| Gambia  | 2019 | 0.783745 | 0.708702 |
| Georgia | 1990 | 0.890262 | 0.542133 |
| Georgia | 1991 | 0.872831 | 0.536789 |
| Georgia | 1992 | 0.850246 | 0.525619 |
| Georgia | 1993 | 0.863035 | 0.531854 |
| Georgia | 1994 | 0.862277 | 0.535854 |
| Georgia | 1995 | 0.840688 | 0.527101 |
| Georgia | 1996 | 0.842497 | 0.532042 |
| Georgia | 1997 | 0.82724  | 0.521857 |
| Georgia | 1998 | 0.793438 | 0.501139 |
| Georgia | 1999 | 0.801938 | 0.500857 |
| Georgia | 2000 | 0.879865 | 0.543389 |

|         |      |          |          |
|---------|------|----------|----------|
| Georgia | 2001 | 0.899387 | 0.565607 |
| Georgia | 2002 | 0.884306 | 0.551759 |
| Georgia | 2003 | 0.910865 | 0.563177 |
| Georgia | 2004 | 0.933848 | 0.577696 |
| Georgia | 2005 | 0.978952 | 0.607314 |
| Georgia | 2006 | 0.962763 | 0.605212 |
| Georgia | 2007 | 0.930799 | 0.599638 |
| Georgia | 2008 | 0.915016 | 0.592516 |
| Georgia | 2009 | 0.943313 | 0.605152 |
| Georgia | 2010 | 0.947623 | 0.596383 |
| Georgia | 2011 | 0.95614  | 0.599604 |
| Georgia | 2012 | 0.978096 | 0.606573 |
| Georgia | 2013 | 1.014494 | 0.623579 |
| Georgia | 2014 | 0.991503 | 0.604425 |
| Georgia | 2015 | 0.965315 | 0.584449 |
| Georgia | 2016 | 0.950849 | 0.575343 |
| Georgia | 2017 | 0.947486 | 0.573143 |
| Georgia | 2018 | 0.940168 | 0.571439 |
| Georgia | 2019 | 0.93624  | 0.569532 |
| Germany | 1990 | 1.487969 | 0.738576 |
| Germany | 1991 | 1.466275 | 0.722103 |
| Germany | 1992 | 1.461023 | 0.715904 |
| Germany | 1993 | 1.449296 | 0.70554  |
| Germany | 1994 | 1.444447 | 0.697681 |
| Germany | 1995 | 1.444922 | 0.689009 |



|         |      |          |          |
|---------|------|----------|----------|
| Germany | 1996 | 1.453565 | 0.686347 |
| Germany | 1997 | 1.483836 | 0.696893 |
| Germany | 1998 | 1.514594 | 0.710752 |
| Germany | 1999 | 1.533725 | 0.718637 |
| Germany | 2000 | 1.553591 | 0.722254 |
| Germany | 2001 | 1.573124 | 0.730431 |
| Germany | 2002 | 1.582824 | 0.736649 |
| Germany | 2003 | 1.574148 | 0.73842  |
| Germany | 2004 | 1.599898 | 0.756378 |
| Germany | 2005 | 1.612897 | 0.768233 |
| Germany | 2006 | 1.602888 | 0.772032 |
| Germany | 2007 | 1.593446 | 0.782936 |
| Germany | 2008 | 1.578264 | 0.792426 |
| Germany | 2009 | 1.556308 | 0.796146 |
| Germany | 2010 | 1.52725  | 0.787571 |
| Germany | 2011 | 1.537922 | 0.783764 |
| Germany | 2012 | 1.527116 | 0.781158 |
| Germany | 2013 | 1.517234 | 0.781468 |
| Germany | 2014 | 1.517122 | 0.78274  |
| Germany | 2015 | 1.509834 | 0.785566 |
| Germany | 2016 | 1.518061 | 0.798449 |
| Germany | 2017 | 1.476666 | 0.804041 |
| Germany | 2018 | 1.444126 | 0.80565  |
| Germany | 2019 | 1.416778 | 0.808654 |
| Ghana   | 1990 | 1.389388 | 1.181071 |

|       |      |          |          |
|-------|------|----------|----------|
| Ghana | 1991 | 1.395297 | 1.186086 |
| Ghana | 1992 | 1.406856 | 1.198388 |
| Ghana | 1993 | 1.408088 | 1.203505 |
| Ghana | 1994 | 1.396314 | 1.196408 |
| Ghana | 1995 | 1.382803 | 1.186929 |
| Ghana | 1996 | 1.372057 | 1.179342 |
| Ghana | 1997 | 1.34008  | 1.155532 |
| Ghana | 1998 | 1.304774 | 1.127515 |
| Ghana | 1999 | 1.250913 | 1.082697 |
| Ghana | 2000 | 1.228704 | 1.061556 |
| Ghana | 2001 | 1.221506 | 1.049951 |
| Ghana | 2002 | 1.201741 | 1.027726 |
| Ghana | 2003 | 1.174967 | 1.001459 |
| Ghana | 2004 | 1.13319  | 0.962102 |
| Ghana | 2005 | 1.104291 | 0.932732 |
| Ghana | 2006 | 1.079481 | 0.906283 |
| Ghana | 2007 | 1.070195 | 0.892958 |
| Ghana | 2008 | 1.057559 | 0.875779 |
| Ghana | 2009 | 1.052341 | 0.864954 |
| Ghana | 2010 | 1.05498  | 0.860277 |
| Ghana | 2011 | 1.049814 | 0.85044  |
| Ghana | 2012 | 1.043791 | 0.839396 |
| Ghana | 2013 | 1.043172 | 0.832323 |
| Ghana | 2014 | 1.057851 | 0.837805 |
| Ghana | 2015 | 1.068515 | 0.839101 |

|        |      |          |          |
|--------|------|----------|----------|
| Ghana  | 2016 | 1.087431 | 0.848637 |
| Ghana  | 2017 | 1.108864 | 0.860005 |
| Ghana  | 2018 | 1.125883 | 0.868676 |
| Ghana  | 2019 | 1.142967 | 0.877856 |
| Greece | 1990 | 1.161016 | 0.870098 |
| Greece | 1991 | 1.167773 | 0.882825 |
| Greece | 1992 | 1.161076 | 0.883274 |
| Greece | 1993 | 1.161909 | 0.888873 |
| Greece | 1994 | 1.167579 | 0.899013 |
| Greece | 1995 | 1.161049 | 0.897684 |
| Greece | 1996 | 1.147164 | 0.891019 |
| Greece | 1997 | 1.144252 | 0.892744 |
| Greece | 1998 | 1.149091 | 0.900029 |
| Greece | 1999 | 1.119722 | 0.880614 |
| Greece | 2000 | 1.101564 | 0.871094 |
| Greece | 2001 | 1.115135 | 0.886731 |
| Greece | 2002 | 1.140613 | 0.916072 |
| Greece | 2003 | 1.15732  | 0.940811 |
| Greece | 2004 | 1.159749 | 0.955428 |
| Greece | 2005 | 1.163923 | 0.972318 |
| Greece | 2006 | 1.182637 | 0.993248 |
| Greece | 2007 | 1.175831 | 0.97592  |
| Greece | 2008 | 1.190464 | 0.969062 |
| Greece | 2009 | 1.153453 | 0.941996 |
| Greece | 2010 | 1.136643 | 0.928388 |

|    |           |      |          |          |
|----|-----------|------|----------|----------|
| 1  |           |      |          |          |
| 2  |           |      |          |          |
| 3  |           |      |          |          |
| 4  |           |      |          |          |
| 5  | Greece    | 2011 | 1.105891 | 0.892206 |
| 6  | Greece    | 2012 | 1.086592 | 0.867041 |
| 7  | Greece    | 2013 | 1.079777 | 0.850836 |
| 8  | Greece    | 2014 | 1.04619  | 0.814348 |
| 9  | Greece    | 2015 | 1.030625 | 0.789385 |
| 10 | Greece    | 2016 | 1.028167 | 0.775855 |
| 11 | Greece    | 2017 | 1.037304 | 0.773643 |
| 12 | Greece    | 2018 | 1.091329 | 0.802598 |
| 13 | Greece    | 2019 | 1.105053 | 0.80773  |
| 14 | Greenland | 1990 | 0.849346 | 0.693694 |
| 15 | Greenland | 1991 | 0.859043 | 0.699506 |
| 16 | Greenland | 1992 | 0.874645 | 0.708875 |
| 17 | Greenland | 1993 | 1.013236 | 0.83206  |
| 18 | Greenland | 1994 | 1.037787 | 0.873406 |
| 19 | Greenland | 1995 | 1.033608 | 0.886208 |
| 20 | Greenland | 1996 | 1.060839 | 0.925261 |
| 21 | Greenland | 1997 | 1.091328 | 0.971297 |
| 22 | Greenland | 1998 | 1.046899 | 0.961443 |
| 23 | Greenland | 1999 | 0.997845 | 0.942449 |
| 24 | Greenland | 2000 | 0.94211  | 0.901702 |
| 25 | Greenland | 2001 | 0.936488 | 0.907813 |
| 26 | Greenland | 2002 | 0.927296 | 0.904154 |
| 27 | Greenland | 2003 | 0.835465 | 0.819147 |
| 28 | Greenland | 2004 | 0.69175  | 0.688599 |
| 29 | Greenland | 2005 | 0.709612 | 0.700803 |
| 30 |           |      |          |          |
| 31 |           |      |          |          |
| 32 |           |      |          |          |
| 33 |           |      |          |          |
| 34 |           |      |          |          |
| 35 |           |      |          |          |
| 36 |           |      |          |          |
| 37 |           |      |          |          |
| 38 |           |      |          |          |
| 39 |           |      |          |          |
| 40 |           |      |          |          |
| 41 |           |      |          |          |
| 42 |           |      |          |          |
| 43 |           |      |          |          |
| 44 |           |      |          |          |
| 45 |           |      |          |          |
| 46 |           |      |          |          |

|           |      |          |          |
|-----------|------|----------|----------|
| Greenland | 2006 | 0.706598 | 0.692802 |
| Greenland | 2007 | 0.705793 | 0.686308 |
| Greenland | 2008 | 0.700539 | 0.680087 |
| Greenland | 2009 | 0.683503 | 0.668978 |
| Greenland | 2010 | 0.672699 | 0.652435 |
| Greenland | 2011 | 0.660619 | 0.635534 |
| Greenland | 2012 | 0.635943 | 0.609095 |
| Greenland | 2013 | 0.625224 | 0.595312 |
| Greenland | 2014 | 0.621571 | 0.594696 |
| Greenland | 2015 | 0.622625 | 0.590524 |
| Greenland | 2016 | 0.63024  | 0.59461  |
| Greenland | 2017 | 0.631927 | 0.596305 |
| Greenland | 2018 | 0.636475 | 0.598319 |
| Greenland | 2019 | 0.633015 | 0.600239 |
| Grenada   | 1990 | 0.797821 | 0.554947 |
| Grenada   | 1991 | 0.791908 | 0.547582 |
| Grenada   | 1992 | 0.797965 | 0.545611 |
| Grenada   | 1993 | 0.866844 | 0.585903 |
| Grenada   | 1994 | 0.868726 | 0.585653 |
| Grenada   | 1995 | 0.866269 | 0.584739 |
| Grenada   | 1996 | 0.831677 | 0.564078 |
| Grenada   | 1997 | 0.811707 | 0.552665 |
| Grenada   | 1998 | 0.799312 | 0.544226 |
| Grenada   | 1999 | 0.688282 | 0.455645 |
| Grenada   | 2000 | 0.68774  | 0.439827 |

|         |      |          |          |
|---------|------|----------|----------|
| Grenada | 2001 | 0.702495 | 0.43759  |
| Grenada | 2002 | 0.711655 | 0.432377 |
| Grenada | 2003 | 0.71962  | 0.428494 |
| Grenada | 2004 | 0.732755 | 0.430247 |
| Grenada | 2005 | 0.760413 | 0.437206 |
| Grenada | 2006 | 0.78936  | 0.443967 |
| Grenada | 2007 | 0.822661 | 0.462776 |
| Grenada | 2008 | 0.842693 | 0.483301 |
| Grenada | 2009 | 0.882412 | 0.508339 |
| Grenada | 2010 | 0.903844 | 0.527307 |
| Grenada | 2011 | 0.928404 | 0.573847 |
| Grenada | 2012 | 1.001204 | 0.718206 |
| Grenada | 2013 | 0.981917 | 0.7194   |
| Grenada | 2014 | 0.951772 | 0.711073 |
| Grenada | 2015 | 0.919374 | 0.703207 |
| Grenada | 2016 | 0.859129 | 0.659112 |
| Grenada | 2017 | 0.835568 | 0.652602 |
| Grenada | 2018 | 0.826236 | 0.657412 |
| Grenada | 2019 | 0.810856 | 0.655619 |
| Guam    | 1990 | 1.204419 | 1.189679 |
| Guam    | 1991 | 1.208766 | 1.188058 |
| Guam    | 1992 | 1.195287 | 1.167342 |
| Guam    | 1993 | 1.16717  | 1.105228 |
| Guam    | 1994 | 1.107875 | 1.004316 |
| Guam    | 1995 | 1.172072 | 1.084015 |

1  
2  
3  
4  
5  
6  
7  
8  
9  
10  
11  
12  
13  
14  
15  
16  
17  
18  
19  
20  
21  
22  
23  
24  
25  
26  
27  
28  
29  
30  
31  
32  
33  
34  
35  
36  
37  
38  
39  
40  
41  
42  
43  
44  
45  
46

|           |      |          |          |
|-----------|------|----------|----------|
| Guam      | 1996 | 1.186921 | 1.127987 |
| Guam      | 1997 | 1.133647 | 1.085355 |
| Guam      | 1998 | 1.1296   | 1.075936 |
| Guam      | 1999 | 1.158874 | 1.091652 |
| Guam      | 2000 | 1.174389 | 1.100938 |
| Guam      | 2001 | 1.203948 | 1.136096 |
| Guam      | 2002 | 1.200842 | 1.132682 |
| Guam      | 2003 | 1.238955 | 1.160038 |
| Guam      | 2004 | 1.113806 | 1.021279 |
| Guam      | 2005 | 0.964523 | 0.850896 |
| Guam      | 2006 | 0.944381 | 0.819772 |
| Guam      | 2007 | 0.929106 | 0.797947 |
| Guam      | 2008 | 0.923572 | 0.78604  |
| Guam      | 2009 | 0.931624 | 0.788499 |
| Guam      | 2010 | 0.940753 | 0.797387 |
| Guam      | 2011 | 0.956968 | 0.812158 |
| Guam      | 2012 | 0.983131 | 0.836726 |
| Guam      | 2013 | 1.004146 | 0.860112 |
| Guam      | 2014 | 1.001106 | 0.863148 |
| Guam      | 2015 | 1.003953 | 0.86564  |
| Guam      | 2016 | 0.994553 | 0.85511  |
| Guam      | 2017 | 1.009881 | 0.866865 |
| Guam      | 2018 | 1.025338 | 0.885139 |
| Guam      | 2019 | 1.062923 | 0.918484 |
| Guatemala | 1990 | 0.953023 | 0.953895 |

|           |      |          |          |
|-----------|------|----------|----------|
| Guatemala | 1991 | 0.933729 | 0.929254 |
| Guatemala | 1992 | 0.92926  | 0.918512 |
| Guatemala | 1993 | 0.914013 | 0.90221  |
| Guatemala | 1994 | 0.896312 | 0.885135 |
| Guatemala | 1995 | 0.890006 | 0.871973 |
| Guatemala | 1996 | 0.901921 | 0.86863  |
| Guatemala | 1997 | 0.899852 | 0.857182 |
| Guatemala | 1998 | 0.872046 | 0.812846 |
| Guatemala | 1999 | 0.865173 | 0.791137 |
| Guatemala | 2000 | 0.863256 | 0.781043 |
| Guatemala | 2001 | 0.820782 | 0.743524 |
| Guatemala | 2002 | 0.83644  | 0.740421 |
| Guatemala | 2003 | 0.84415  | 0.738636 |
| Guatemala | 2004 | 0.843046 | 0.720606 |
| Guatemala | 2005 | 0.838576 | 0.707155 |
| Guatemala | 2006 | 0.856915 | 0.71003  |
| Guatemala | 2007 | 0.868494 | 0.712748 |
| Guatemala | 2008 | 0.88503  | 0.714982 |
| Guatemala | 2009 | 0.910003 | 0.728899 |
| Guatemala | 2010 | 0.930968 | 0.739534 |
| Guatemala | 2011 | 0.943079 | 0.746912 |
| Guatemala | 2012 | 0.956022 | 0.754441 |
| Guatemala | 2013 | 0.95592  | 0.752758 |
| Guatemala | 2014 | 0.970023 | 0.757865 |
| Guatemala | 2015 | 0.969041 | 0.752183 |



1  
2  
3  
4  
5  
6  
7  
8  
9  
10  
11  
12  
13  
14  
15  
16  
17  
18  
19  
20  
21  
22  
23  
24  
25  
26  
27  
28  
29  
30  
31  
32  
33  
34  
35  
36  
37  
38  
39  
40  
41  
42  
43  
44  
45  
46

|               |      |          |          |
|---------------|------|----------|----------|
| Guatemala     | 2016 | 0.983854 | 0.758866 |
| Guatemala     | 2017 | 0.994562 | 0.768067 |
| Guatemala     | 2018 | 0.99077  | 0.763013 |
| Guatemala     | 2019 | 0.995586 | 0.764309 |
| Guinea-Bissau | 1990 | 0.748122 | 0.670412 |
| Guinea-Bissau | 1991 | 0.75664  | 0.671111 |
| Guinea-Bissau | 1992 | 0.764453 | 0.671795 |
| Guinea-Bissau | 1993 | 0.770896 | 0.671429 |
| Guinea-Bissau | 1994 | 0.775841 | 0.67024  |
| Guinea-Bissau | 1995 | 0.778009 | 0.667293 |
| Guinea-Bissau | 1996 | 0.781511 | 0.664792 |
| Guinea-Bissau | 1997 | 0.784534 | 0.662213 |
| Guinea-Bissau | 1998 | 0.781983 | 0.655103 |
| Guinea-Bissau | 1999 | 0.773202 | 0.643304 |
| Guinea-Bissau | 2000 | 0.774928 | 0.639101 |
| Guinea-Bissau | 2001 | 0.769671 | 0.63055  |
| Guinea-Bissau | 2002 | 0.776817 | 0.632411 |
| Guinea-Bissau | 2003 | 0.783424 | 0.634572 |
| Guinea-Bissau | 2004 | 0.781804 | 0.630986 |
| Guinea-Bissau | 2005 | 0.777461 | 0.625183 |
| Guinea-Bissau | 2006 | 0.785814 | 0.629214 |
| Guinea-Bissau | 2007 | 0.790956 | 0.63183  |
| Guinea-Bissau | 2008 | 0.789619 | 0.630173 |
| Guinea-Bissau | 2009 | 0.791031 | 0.630407 |
| Guinea-Bissau | 2010 | 0.788492 | 0.627204 |

|               |      |          |          |
|---------------|------|----------|----------|
| Guinea-Bissau | 2011 | 0.780258 | 0.621232 |
| Guinea-Bissau | 2012 | 0.77979  | 0.621828 |
| Guinea-Bissau | 2013 | 0.775523 | 0.619504 |
| Guinea-Bissau | 2014 | 0.781231 | 0.623934 |
| Guinea-Bissau | 2015 | 0.785211 | 0.627208 |
| Guinea-Bissau | 2016 | 0.790123 | 0.632173 |
| Guinea-Bissau | 2017 | 0.794982 | 0.636694 |
| Guinea-Bissau | 2018 | 0.794557 | 0.636869 |
| Guinea-Bissau | 2019 | 0.79691  | 0.639962 |
| Guinea        | 1990 | 1.106482 | 1.06805  |
| Guinea        | 1991 | 1.101821 | 1.062402 |
| Guinea        | 1992 | 1.092566 | 1.051668 |
| Guinea        | 1993 | 1.079614 | 1.036735 |
| Guinea        | 1994 | 1.063496 | 1.018359 |
| Guinea        | 1995 | 1.044157 | 0.994427 |
| Guinea        | 1996 | 1.023563 | 0.970226 |
| Guinea        | 1997 | 1.003974 | 0.94782  |
| Guinea        | 1998 | 0.984752 | 0.924564 |
| Guinea        | 1999 | 0.959149 | 0.894479 |
| Guinea        | 2000 | 0.948271 | 0.875656 |
| Guinea        | 2001 | 0.93673  | 0.86105  |
| Guinea        | 2002 | 0.926789 | 0.848561 |
| Guinea        | 2003 | 0.921873 | 0.840532 |
| Guinea        | 2004 | 0.914807 | 0.83004  |
| Guinea        | 2005 | 0.909379 | 0.821056 |

|        |      |          |          |
|--------|------|----------|----------|
| Guinea | 2006 | 0.897855 | 0.809873 |
| Guinea | 2007 | 0.88313  | 0.797058 |
| Guinea | 2008 | 0.8682   | 0.784253 |
| Guinea | 2009 | 0.856308 | 0.774402 |
| Guinea | 2010 | 0.844945 | 0.765219 |
| Guinea | 2011 | 0.838392 | 0.761209 |
| Guinea | 2012 | 0.832401 | 0.75916  |
| Guinea | 2013 | 0.825926 | 0.757267 |
| Guinea | 2014 | 0.825605 | 0.761087 |
| Guinea | 2015 | 0.827532 | 0.766111 |
| Guinea | 2016 | 0.830462 | 0.774096 |
| Guinea | 2017 | 0.833695 | 0.783024 |
| Guinea | 2018 | 0.834033 | 0.789338 |
| Guinea | 2019 | 0.836231 | 0.796133 |
| Guyana | 1990 | 0.804795 | 0.730845 |
| Guyana | 1991 | 0.825743 | 0.745172 |
| Guyana | 1992 | 0.815942 | 0.730925 |
| Guyana | 1993 | 0.815344 | 0.715393 |
| Guyana | 1994 | 0.833385 | 0.730953 |
| Guyana | 1995 | 0.82273  | 0.725093 |
| Guyana | 1996 | 0.826799 | 0.72395  |
| Guyana | 1997 | 0.801758 | 0.710721 |
| Guyana | 1998 | 0.804478 | 0.710939 |
| Guyana | 1999 | 0.816289 | 0.717467 |
| Guyana | 2000 | 0.851078 | 0.75824  |

|        |      |          |          |
|--------|------|----------|----------|
| Guyana | 2001 | 0.856085 | 0.770243 |
| Guyana | 2002 | 0.868114 | 0.792286 |
| Guyana | 2003 | 0.88199  | 0.808553 |
| Guyana | 2004 | 0.881747 | 0.805175 |
| Guyana | 2005 | 0.876973 | 0.799695 |
| Guyana | 2006 | 0.86259  | 0.785305 |
| Guyana | 2007 | 0.871755 | 0.796174 |
| Guyana | 2008 | 0.866064 | 0.79292  |
| Guyana | 2009 | 0.856384 | 0.776095 |
| Guyana | 2010 | 0.870928 | 0.791752 |
| Guyana | 2011 | 0.864618 | 0.787339 |
| Guyana | 2012 | 0.858249 | 0.769835 |
| Guyana | 2013 | 0.868019 | 0.754845 |
| Guyana | 2014 | 0.883459 | 0.756936 |
| Guyana | 2015 | 0.904528 | 0.783773 |
| Guyana | 2016 | 0.909773 | 0.785122 |
| Guyana | 2017 | 0.907778 | 0.779852 |
| Guyana | 2018 | 0.916706 | 0.792253 |
| Guyana | 2019 | 0.917252 | 0.792395 |
| Haiti  | 1990 | 0.848252 | 0.694669 |
| Haiti  | 1991 | 0.851834 | 0.699622 |
| Haiti  | 1992 | 0.858366 | 0.705985 |
| Haiti  | 1993 | 0.868323 | 0.715498 |
| Haiti  | 1994 | 0.889488 | 0.733226 |
| Haiti  | 1995 | 0.884666 | 0.730909 |

1  
2  
3  
4  
5  
6  
7  
8  
9  
10  
11  
12  
13  
14  
15  
16  
17  
18  
19  
20  
21  
22  
23  
24  
25  
26  
27  
28  
29  
30  
31  
32  
33  
34  
35  
36  
37  
38  
39  
40  
41  
42  
43  
44  
45  
46

|          |      |          |          |
|----------|------|----------|----------|
| Haiti    | 1996 | 0.885902 | 0.73329  |
| Haiti    | 1997 | 0.88977  | 0.737561 |
| Haiti    | 1998 | 0.897728 | 0.746391 |
| Haiti    | 1999 | 0.918178 | 0.763662 |
| Haiti    | 2000 | 0.933843 | 0.777576 |
| Haiti    | 2001 | 0.952387 | 0.793799 |
| Haiti    | 2002 | 0.965378 | 0.805915 |
| Haiti    | 2003 | 0.979128 | 0.818581 |
| Haiti    | 2004 | 0.996137 | 0.833853 |
| Haiti    | 2005 | 1.011615 | 0.848181 |
| Haiti    | 2006 | 1.003287 | 0.843106 |
| Haiti    | 2007 | 0.991817 | 0.835123 |
| Haiti    | 2008 | 0.977956 | 0.825209 |
| Haiti    | 2009 | 0.969319 | 0.818318 |
| Haiti    | 2010 | 0.971384 | 0.814256 |
| Haiti    | 2011 | 0.977353 | 0.812342 |
| Haiti    | 2012 | 0.970589 | 0.807299 |
| Haiti    | 2013 | 0.964412 | 0.801409 |
| Haiti    | 2014 | 0.961933 | 0.797931 |
| Haiti    | 2015 | 0.961316 | 0.795943 |
| Haiti    | 2016 | 0.958705 | 0.793089 |
| Haiti    | 2017 | 0.953425 | 0.7883   |
| Haiti    | 2018 | 0.949688 | 0.78419  |
| Haiti    | 2019 | 0.950462 | 0.784143 |
| Honduras | 1990 | 0.931423 | 0.792876 |

|          |      |          |          |
|----------|------|----------|----------|
| Honduras | 1991 | 0.893526 | 0.757388 |
| Honduras | 1992 | 0.98682  | 0.839842 |
| Honduras | 1993 | 0.96852  | 0.824803 |
| Honduras | 1994 | 0.959285 | 0.818048 |
| Honduras | 1995 | 1.132512 | 0.982388 |
| Honduras | 1996 | 1.204171 | 1.080562 |
| Honduras | 1997 | 1.196654 | 1.084657 |
| Honduras | 1998 | 1.188782 | 1.087144 |
| Honduras | 1999 | 1.177838 | 1.086961 |
| Honduras | 2000 | 1.167179 | 1.085797 |
| Honduras | 2001 | 1.166044 | 1.09074  |
| Honduras | 2002 | 1.190753 | 1.118393 |
| Honduras | 2003 | 1.220312 | 1.149288 |
| Honduras | 2004 | 1.21409  | 1.147758 |
| Honduras | 2005 | 1.210856 | 1.145859 |
| Honduras | 2006 | 1.206554 | 1.142104 |
| Honduras | 2007 | 1.201772 | 1.137077 |
| Honduras | 2008 | 1.193002 | 1.129034 |
| Honduras | 2009 | 1.17622  | 1.114785 |
| Honduras | 2010 | 1.158652 | 1.099057 |
| Honduras | 2011 | 1.132415 | 1.071005 |
| Honduras | 2012 | 1.049605 | 0.966428 |
| Honduras | 2013 | 1.061289 | 0.964852 |
| Honduras | 2014 | 1.072882 | 0.964053 |
| Honduras | 2015 | 1.084842 | 0.9635   |

1  
2  
3  
4  
5  
6  
7  
8  
9  
10  
11  
12  
13  
14  
15  
16  
17  
18  
19  
20  
21  
22  
23  
24  
25  
26  
27  
28  
29  
30  
31  
32  
33  
34  
35  
36  
37  
38  
39  
40  
41  
42  
43  
44  
45  
46

|          |      |          |          |
|----------|------|----------|----------|
| Honduras | 2016 | 1.097255 | 0.964191 |
| Honduras | 2017 | 1.113633 | 0.969835 |
| Honduras | 2018 | 1.133398 | 0.979179 |
| Honduras | 2019 | 1.150707 | 0.987235 |
| Hungary  | 1990 | 1.248905 | 0.783216 |
| Hungary  | 1991 | 1.273197 | 0.788897 |
| Hungary  | 1992 | 1.235009 | 0.764683 |
| Hungary  | 1993 | 1.231176 | 0.75623  |
| Hungary  | 1994 | 1.207315 | 0.733594 |
| Hungary  | 1995 | 1.224856 | 0.735564 |
| Hungary  | 1996 | 1.257931 | 0.743862 |
| Hungary  | 1997 | 1.308379 | 0.767016 |
| Hungary  | 1998 | 1.328475 | 0.772198 |
| Hungary  | 1999 | 1.338323 | 0.77329  |
| Hungary  | 2000 | 1.35984  | 0.776331 |
| Hungary  | 2001 | 1.359909 | 0.773614 |
| Hungary  | 2002 | 1.345923 | 0.763105 |
| Hungary  | 2003 | 1.355023 | 0.763996 |
| Hungary  | 2004 | 1.373922 | 0.770584 |
| Hungary  | 2005 | 1.367215 | 0.760508 |
| Hungary  | 2006 | 1.414381 | 0.777394 |
| Hungary  | 2007 | 1.476528 | 0.803333 |
| Hungary  | 2008 | 1.536635 | 0.823527 |
| Hungary  | 2009 | 1.559169 | 0.826695 |
| Hungary  | 2010 | 1.632679 | 0.854821 |

|         |      |          |          |
|---------|------|----------|----------|
| Hungary | 2011 | 1.687514 | 0.88035  |
| Hungary | 2012 | 1.701139 | 0.882161 |
| Hungary | 2013 | 1.757902 | 0.906339 |
| Hungary | 2014 | 1.755502 | 0.906485 |
| Hungary | 2015 | 1.78418  | 0.922637 |
| Hungary | 2016 | 1.735478 | 0.893355 |
| Hungary | 2017 | 1.75693  | 0.901822 |
| Hungary | 2018 | 1.744163 | 0.896852 |
| Hungary | 2019 | 1.776262 | 0.914186 |
| Iceland | 1990 | 0.893067 | 0.617346 |
| Iceland | 1991 | 0.898833 | 0.619624 |
| Iceland | 1992 | 0.904815 | 0.624484 |
| Iceland | 1993 | 0.906251 | 0.624472 |
| Iceland | 1994 | 0.900378 | 0.620242 |
| Iceland | 1995 | 0.886218 | 0.609419 |
| Iceland | 1996 | 0.865607 | 0.592359 |
| Iceland | 1997 | 0.86581  | 0.590292 |
| Iceland | 1998 | 0.87148  | 0.58898  |
| Iceland | 1999 | 0.88968  | 0.596646 |
| Iceland | 2000 | 0.939133 | 0.627518 |
| Iceland | 2001 | 0.946968 | 0.636139 |
| Iceland | 2002 | 0.918585 | 0.619865 |
| Iceland | 2003 | 0.932633 | 0.628488 |
| Iceland | 2004 | 0.943794 | 0.63412  |
| Iceland | 2005 | 0.920771 | 0.620702 |



|         |      |          |          |
|---------|------|----------|----------|
| Iceland | 2006 | 0.875513 | 0.592684 |
| Iceland | 2007 | 0.828134 | 0.560027 |
| Iceland | 2008 | 0.813439 | 0.547711 |
| Iceland | 2009 | 0.797623 | 0.532781 |
| Iceland | 2010 | 0.792424 | 0.527124 |
| Iceland | 2011 | 0.797199 | 0.526861 |
| Iceland | 2012 | 0.781397 | 0.512562 |
| Iceland | 2013 | 0.816639 | 0.53432  |
| Iceland | 2014 | 0.891672 | 0.581795 |
| Iceland | 2015 | 0.868086 | 0.571245 |
| Iceland | 2016 | 0.841589 | 0.554825 |
| Iceland | 2017 | 0.799747 | 0.529264 |
| Iceland | 2018 | 0.791315 | 0.524633 |
| Iceland | 2019 | 0.793979 | 0.527376 |
| India   | 1990 | 0.67198  | 0.651392 |
| India   | 1991 | 0.664991 | 0.649046 |
| India   | 1992 | 0.677239 | 0.659893 |
| India   | 1993 | 0.668435 | 0.653609 |
| India   | 1994 | 0.664197 | 0.64799  |
| India   | 1995 | 0.665584 | 0.647018 |
| India   | 1996 | 0.664089 | 0.640755 |
| India   | 1997 | 0.665254 | 0.640588 |
| India   | 1998 | 0.672932 | 0.647828 |
| India   | 1999 | 0.667927 | 0.643606 |
| India   | 2000 | 0.650053 | 0.62195  |

|    |           |      |          |          |
|----|-----------|------|----------|----------|
| 1  |           |      |          |          |
| 2  |           |      |          |          |
| 3  |           |      |          |          |
| 4  |           |      |          |          |
| 5  | India     | 2001 | 0.648807 | 0.6203   |
| 6  | India     | 2002 | 0.645959 | 0.616526 |
| 7  | India     | 2003 | 0.627599 | 0.596667 |
| 8  | India     | 2004 | 0.61961  | 0.587071 |
| 9  | India     | 2005 | 0.617428 | 0.584254 |
| 10 | India     | 2006 | 0.621215 | 0.591136 |
| 11 | India     | 2007 | 0.62422  | 0.595923 |
| 12 | India     | 2008 | 0.614686 | 0.585389 |
| 13 | India     | 2009 | 0.615543 | 0.579393 |
| 14 | India     | 2010 | 0.627674 | 0.58403  |
| 15 | India     | 2011 | 0.631651 | 0.587956 |
| 16 | India     | 2012 | 0.643951 | 0.600207 |
| 17 | India     | 2013 | 0.668672 | 0.612078 |
| 18 | India     | 2014 | 0.697766 | 0.627543 |
| 19 | India     | 2015 | 0.726946 | 0.655171 |
| 20 | India     | 2016 | 0.727723 | 0.661042 |
| 21 | India     | 2017 | 0.728097 | 0.663525 |
| 22 | India     | 2018 | 0.72818  | 0.659649 |
| 23 | India     | 2019 | 0.732114 | 0.664084 |
| 24 | Indonesia | 1990 | 0.904475 | 0.805626 |
| 25 | Indonesia | 1991 | 0.89592  | 0.79993  |
| 26 | Indonesia | 1992 | 0.891139 | 0.796224 |
| 27 | Indonesia | 1993 | 0.896197 | 0.800503 |
| 28 | Indonesia | 1994 | 0.901232 | 0.804676 |
| 29 | Indonesia | 1995 | 0.910442 | 0.812309 |
| 30 |           |      |          |          |
| 31 |           |      |          |          |
| 32 |           |      |          |          |
| 33 |           |      |          |          |
| 34 |           |      |          |          |
| 35 |           |      |          |          |
| 36 |           |      |          |          |
| 37 |           |      |          |          |
| 38 |           |      |          |          |
| 39 |           |      |          |          |
| 40 |           |      |          |          |
| 41 |           |      |          |          |
| 42 |           |      |          |          |
| 43 |           |      |          |          |
| 44 |           |      |          |          |
| 45 |           |      |          |          |
| 46 |           |      |          |          |

|                            |      |          |          |
|----------------------------|------|----------|----------|
| Indonesia                  | 1996 | 0.920734 | 0.822294 |
| Indonesia                  | 1997 | 0.925581 | 0.826452 |
| Indonesia                  | 1998 | 0.926823 | 0.827526 |
| Indonesia                  | 1999 | 0.927296 | 0.82819  |
| Indonesia                  | 2000 | 0.921737 | 0.824503 |
| Indonesia                  | 2001 | 0.909081 | 0.815638 |
| Indonesia                  | 2002 | 0.901911 | 0.810925 |
| Indonesia                  | 2003 | 0.900123 | 0.810677 |
| Indonesia                  | 2004 | 0.895603 | 0.807667 |
| Indonesia                  | 2005 | 0.891928 | 0.804423 |
| Indonesia                  | 2006 | 0.887582 | 0.802247 |
| Indonesia                  | 2007 | 0.88547  | 0.801573 |
| Indonesia                  | 2008 | 0.871184 | 0.787266 |
| Indonesia                  | 2009 | 0.857157 | 0.773813 |
| Indonesia                  | 2010 | 0.84432  | 0.761141 |
| Indonesia                  | 2011 | 0.825542 | 0.744336 |
| Indonesia                  | 2012 | 0.794104 | 0.715721 |
| Indonesia                  | 2013 | 0.771454 | 0.694276 |
| Indonesia                  | 2014 | 0.746281 | 0.67051  |
| Indonesia                  | 2015 | 0.731324 | 0.656279 |
| Indonesia                  | 2016 | 0.726472 | 0.653465 |
| Indonesia                  | 2017 | 0.727428 | 0.654714 |
| Indonesia                  | 2018 | 0.726543 | 0.654163 |
| Indonesia                  | 2019 | 0.725323 | 0.653072 |
| Iran (Islamic Republic of) | 1990 | 0.846309 | 0.884767 |

|                            |      |          |          |
|----------------------------|------|----------|----------|
| Iran (Islamic Republic of) | 1991 | 0.850062 | 0.895933 |
| Iran (Islamic Republic of) | 1992 | 0.845513 | 0.897431 |
| Iran (Islamic Republic of) | 1993 | 0.850854 | 0.909371 |
| Iran (Islamic Republic of) | 1994 | 0.846549 | 0.911123 |
| Iran (Islamic Republic of) | 1995 | 0.850514 | 0.921504 |
| Iran (Islamic Republic of) | 1996 | 0.865414 | 0.943133 |
| Iran (Islamic Republic of) | 1997 | 0.868181 | 0.951728 |
| Iran (Islamic Republic of) | 1998 | 0.872144 | 0.960851 |
| Iran (Islamic Republic of) | 1999 | 0.866475 | 0.958325 |
| Iran (Islamic Republic of) | 2000 | 0.887477 | 0.985288 |
| Iran (Islamic Republic of) | 2001 | 0.899208 | 1.00184  |
| Iran (Islamic Republic of) | 2002 | 0.886266 | 0.98971  |
| Iran (Islamic Republic of) | 2003 | 0.872632 | 0.974236 |
| Iran (Islamic Republic of) | 2004 | 0.871049 | 0.970715 |
| Iran (Islamic Republic of) | 2005 | 0.871362 | 0.967471 |
| Iran (Islamic Republic of) | 2006 | 0.858624 | 0.948691 |
| Iran (Islamic Republic of) | 2007 | 0.840085 | 0.919136 |
| Iran (Islamic Republic of) | 2008 | 0.829588 | 0.900372 |
| Iran (Islamic Republic of) | 2009 | 0.824816 | 0.888598 |
| Iran (Islamic Republic of) | 2010 | 0.826351 | 0.879267 |
| Iran (Islamic Republic of) | 2011 | 0.825291 | 0.871341 |
| Iran (Islamic Republic of) | 2012 | 0.823102 | 0.865946 |
| Iran (Islamic Republic of) | 2013 | 0.839203 | 0.883214 |
| Iran (Islamic Republic of) | 2014 | 0.858072 | 0.903726 |
| Iran (Islamic Republic of) | 2015 | 0.87411  | 0.919495 |

|                            |      |          |          |
|----------------------------|------|----------|----------|
| Iran (Islamic Republic of) | 2016 | 0.89088  | 0.937536 |
| Iran (Islamic Republic of) | 2017 | 0.901889 | 0.949128 |
| Iran (Islamic Republic of) | 2018 | 0.906975 | 0.953392 |
| Iran (Islamic Republic of) | 2019 | 0.915692 | 0.961205 |
| Iraq                       | 1990 | 1.038715 | 0.921613 |
| Iraq                       | 1991 | 1.028035 | 0.91066  |
| Iraq                       | 1992 | 1.015177 | 0.901312 |
| Iraq                       | 1993 | 0.996418 | 0.884872 |
| Iraq                       | 1994 | 0.978218 | 0.864977 |
| Iraq                       | 1995 | 0.970719 | 0.857555 |
| Iraq                       | 1996 | 0.96171  | 0.847265 |
| Iraq                       | 1997 | 0.947098 | 0.832703 |
| Iraq                       | 1998 | 0.932334 | 0.819284 |
| Iraq                       | 1999 | 0.923562 | 0.811365 |
| Iraq                       | 2000 | 0.916529 | 0.805188 |
| Iraq                       | 2001 | 0.912447 | 0.800956 |
| Iraq                       | 2002 | 0.91232  | 0.799917 |
| Iraq                       | 2003 | 0.912054 | 0.799067 |
| Iraq                       | 2004 | 0.919368 | 0.806158 |
| Iraq                       | 2005 | 0.923599 | 0.808822 |
| Iraq                       | 2006 | 0.932396 | 0.814381 |
| Iraq                       | 2007 | 0.932736 | 0.812761 |
| Iraq                       | 2008 | 0.928361 | 0.808737 |
| Iraq                       | 2009 | 0.91609  | 0.797203 |
| Iraq                       | 2010 | 0.898317 | 0.779174 |

|         |      |          |          |
|---------|------|----------|----------|
| Iraq    | 2011 | 0.886643 | 0.769248 |
| Iraq    | 2012 | 0.873397 | 0.75733  |
| Iraq    | 2013 | 0.859141 | 0.744408 |
| Iraq    | 2014 | 0.849341 | 0.734867 |
| Iraq    | 2015 | 0.848791 | 0.733316 |
| Iraq    | 2016 | 0.849734 | 0.733889 |
| Iraq    | 2017 | 0.850296 | 0.733783 |
| Iraq    | 2018 | 0.838897 | 0.725088 |
| Iraq    | 2019 | 0.823535 | 0.707666 |
| Ireland | 1990 | 0.990332 | 0.642532 |
| Ireland | 1991 | 1.01067  | 0.652745 |
| Ireland | 1992 | 1.005023 | 0.645801 |
| Ireland | 1993 | 0.997892 | 0.639265 |
| Ireland | 1994 | 1.016307 | 0.644885 |
| Ireland | 1995 | 1.014649 | 0.636152 |
| Ireland | 1996 | 1.000293 | 0.620096 |
| Ireland | 1997 | 1.020021 | 0.631417 |
| Ireland | 1998 | 1.031917 | 0.637105 |
| Ireland | 1999 | 1.024805 | 0.629057 |
| Ireland | 2000 | 1.008419 | 0.613226 |
| Ireland | 2001 | 1.019148 | 0.611967 |
| Ireland | 2002 | 1.021805 | 0.615345 |
| Ireland | 2003 | 1.021697 | 0.61487  |
| Ireland | 2004 | 1.005065 | 0.60004  |
| Ireland | 2005 | 1.045104 | 0.620705 |

1  
2  
3  
4  
5  
6  
7  
8  
9  
10  
11  
12  
13  
14  
15  
16  
17  
18  
19  
20  
21  
22  
23  
24  
25  
26  
27  
28  
29  
30  
31  
32  
33  
34  
35  
36  
37  
38  
39  
40  
41  
42  
43  
44  
45  
46

|         |      |          |          |
|---------|------|----------|----------|
| Ireland | 2006 | 1.067788 | 0.636154 |
| Ireland | 2007 | 1.052256 | 0.630424 |
| Ireland | 2008 | 1.038694 | 0.625566 |
| Ireland | 2009 | 1.017066 | 0.619329 |
| Ireland | 2010 | 1.018538 | 0.623428 |
| Ireland | 2011 | 1.012795 | 0.627264 |
| Ireland | 2012 | 0.975791 | 0.606707 |
| Ireland | 2013 | 0.943072 | 0.590724 |
| Ireland | 2014 | 0.941779 | 0.595064 |
| Ireland | 2015 | 0.952201 | 0.609346 |
| Ireland | 2016 | 0.942132 | 0.61169  |
| Ireland | 2017 | 0.933334 | 0.615757 |
| Ireland | 2018 | 0.93453  | 0.626241 |
| Ireland | 2019 | 0.920745 | 0.626484 |
| Israel  | 1990 | 0.94219  | 0.786904 |
| Israel  | 1991 | 0.919965 | 0.762573 |
| Israel  | 1992 | 0.917957 | 0.753597 |
| Israel  | 1993 | 0.919162 | 0.74611  |
| Israel  | 1994 | 0.919964 | 0.740401 |
| Israel  | 1995 | 0.89525  | 0.714392 |
| Israel  | 1996 | 0.885476 | 0.706356 |
| Israel  | 1997 | 0.869098 | 0.688093 |
| Israel  | 1998 | 0.857361 | 0.667378 |
| Israel  | 1999 | 0.855316 | 0.658138 |
| Israel  | 2000 | 0.841052 | 0.644188 |

|    |        |      |          |          |
|----|--------|------|----------|----------|
| 1  |        |      |          |          |
| 2  |        |      |          |          |
| 3  |        |      |          |          |
| 4  |        |      |          |          |
| 5  | Israel | 2001 | 0.848966 | 0.6474   |
| 6  | Israel | 2002 | 0.849254 | 0.644365 |
| 7  | Israel | 2003 | 0.849257 | 0.639475 |
| 8  | Israel | 2004 | 0.858922 | 0.643102 |
| 9  | Israel | 2005 | 0.861348 | 0.642839 |
| 10 | Israel | 2006 | 0.870257 | 0.648499 |
| 11 | Israel | 2007 | 0.877613 | 0.649739 |
| 12 | Israel | 2008 | 0.887024 | 0.649546 |
| 13 | Israel | 2009 | 0.903354 | 0.655117 |
| 14 | Israel | 2010 | 0.894466 | 0.645255 |
| 15 | Israel | 2011 | 0.916316 | 0.659221 |
| 16 | Israel | 2012 | 0.908112 | 0.649691 |
| 17 | Israel | 2013 | 0.919164 | 0.653967 |
| 18 | Israel | 2014 | 0.917547 | 0.649284 |
| 19 | Israel | 2015 | 0.902198 | 0.636174 |
| 20 | Israel | 2016 | 0.931438 | 0.657062 |
| 21 | Israel | 2017 | 0.929475 | 0.656012 |
| 22 | Israel | 2018 | 0.923335 | 0.653248 |
| 23 | Israel | 2019 | 0.923192 | 0.655589 |
| 24 | Italy  | 1990 | 1.090376 | 0.643927 |
| 25 | Italy  | 1991 | 1.081423 | 0.637552 |
| 26 | Italy  | 1992 | 1.078447 | 0.634752 |
| 27 | Italy  | 1993 | 1.088728 | 0.638461 |
| 28 | Italy  | 1994 | 1.092486 | 0.639173 |
| 29 | Italy  | 1995 | 1.104435 | 0.642915 |
| 30 |        |      |          |          |
| 31 |        |      |          |          |
| 32 |        |      |          |          |
| 33 |        |      |          |          |
| 34 |        |      |          |          |
| 35 |        |      |          |          |
| 36 |        |      |          |          |
| 37 |        |      |          |          |
| 38 |        |      |          |          |
| 39 |        |      |          |          |
| 40 |        |      |          |          |
| 41 |        |      |          |          |
| 42 |        |      |          |          |
| 43 |        |      |          |          |
| 44 |        |      |          |          |
| 45 |        |      |          |          |
| 46 |        |      |          |          |



1  
2  
3  
4  
5  
6  
7  
8  
9  
10  
11  
12  
13  
14  
15  
16  
17  
18  
19  
20  
21  
22  
23  
24  
25  
26  
27  
28  
29  
30  
31  
32  
33  
34  
35  
36  
37  
38  
39  
40  
41  
42  
43  
44  
45  
46

|         |      |          |          |
|---------|------|----------|----------|
| Italy   | 1996 | 1.115154 | 0.644873 |
| Italy   | 1997 | 1.121742 | 0.644068 |
| Italy   | 1998 | 1.130953 | 0.645348 |
| Italy   | 1999 | 1.141682 | 0.646889 |
| Italy   | 2000 | 1.166232 | 0.654341 |
| Italy   | 2001 | 1.182466 | 0.657137 |
| Italy   | 2002 | 1.207321 | 0.66463  |
| Italy   | 2003 | 1.209099 | 0.6605   |
| Italy   | 2004 | 1.216337 | 0.660522 |
| Italy   | 2005 | 1.211844 | 0.651899 |
| Italy   | 2006 | 1.208596 | 0.644847 |
| Italy   | 2007 | 1.210034 | 0.642825 |
| Italy   | 2008 | 1.223902 | 0.648972 |
| Italy   | 2009 | 1.227047 | 0.651423 |
| Italy   | 2010 | 1.241487 | 0.658229 |
| Italy   | 2011 | 1.256087 | 0.66503  |
| Italy   | 2012 | 1.269111 | 0.672045 |
| Italy   | 2013 | 1.262556 | 0.669897 |
| Italy   | 2014 | 1.259651 | 0.670649 |
| Italy   | 2015 | 1.248791 | 0.665998 |
| Italy   | 2016 | 1.241213 | 0.662825 |
| Italy   | 2017 | 1.220767 | 0.657356 |
| Italy   | 2018 | 1.222834 | 0.665099 |
| Italy   | 2019 | 1.210609 | 0.666333 |
| Jamaica | 1990 | 0.636078 | 0.518682 |

|         |      |          |          |
|---------|------|----------|----------|
| Jamaica | 1991 | 0.692646 | 0.56671  |
| Jamaica | 1992 | 0.687608 | 0.56459  |
| Jamaica | 1993 | 0.690036 | 0.566605 |
| Jamaica | 1994 | 0.708948 | 0.583474 |
| Jamaica | 1995 | 0.731778 | 0.602656 |
| Jamaica | 1996 | 0.755209 | 0.621615 |
| Jamaica | 1997 | 0.780986 | 0.641921 |
| Jamaica | 1998 | 0.780952 | 0.642028 |
| Jamaica | 1999 | 0.813121 | 0.665991 |
| Jamaica | 2000 | 0.899106 | 0.732146 |
| Jamaica | 2001 | 0.899379 | 0.732191 |
| Jamaica | 2002 | 0.891943 | 0.735452 |
| Jamaica | 2003 | 0.881381 | 0.726775 |
| Jamaica | 2004 | 0.900935 | 0.744511 |
| Jamaica | 2005 | 0.913895 | 0.76107  |
| Jamaica | 2006 | 0.88166  | 0.736568 |
| Jamaica | 2007 | 0.74946  | 0.632214 |
| Jamaica | 2008 | 0.637378 | 0.539676 |
| Jamaica | 2009 | 0.588224 | 0.494132 |
| Jamaica | 2010 | 0.715381 | 0.601316 |
| Jamaica | 2011 | 0.647498 | 0.544749 |
| Jamaica | 2012 | 0.7813   | 0.660719 |
| Jamaica | 2013 | 0.79124  | 0.671617 |
| Jamaica | 2014 | 0.762489 | 0.646836 |
| Jamaica | 2015 | 0.756701 | 0.64138  |

|         |      |          |          |
|---------|------|----------|----------|
| Jamaica | 2016 | 0.739837 | 0.632018 |
| Jamaica | 2017 | 0.737952 | 0.631909 |
| Jamaica | 2018 | 0.739624 | 0.63439  |
| Jamaica | 2019 | 0.76193  | 0.654431 |
| Japan   | 1990 | 1.071062 | 0.680444 |
| Japan   | 1991 | 1.070475 | 0.67287  |
| Japan   | 1992 | 1.076246 | 0.669168 |
| Japan   | 1993 | 1.085941 | 0.668386 |
| Japan   | 1994 | 1.096482 | 0.668363 |
| Japan   | 1995 | 1.098415 | 0.665185 |
| Japan   | 1996 | 1.116045 | 0.671318 |
| Japan   | 1997 | 1.116951 | 0.666228 |
| Japan   | 1998 | 1.100232 | 0.650244 |
| Japan   | 1999 | 1.085048 | 0.634718 |
| Japan   | 2000 | 1.077853 | 0.623941 |
| Japan   | 2001 | 1.078097 | 0.617512 |
| Japan   | 2002 | 1.081282 | 0.611892 |
| Japan   | 2003 | 1.076595 | 0.602602 |
| Japan   | 2004 | 1.086712 | 0.601979 |
| Japan   | 2005 | 1.079257 | 0.590908 |
| Japan   | 2006 | 1.089796 | 0.590608 |
| Japan   | 2007 | 1.081004 | 0.581309 |
| Japan   | 2008 | 1.068997 | 0.570964 |
| Japan   | 2009 | 1.047886 | 0.557176 |
| Japan   | 2010 | 1.039781 | 0.550218 |

|    |        |      |          |          |
|----|--------|------|----------|----------|
| 1  |        |      |          |          |
| 2  |        |      |          |          |
| 3  |        |      |          |          |
| 4  |        |      |          |          |
| 5  | Japan  | 2011 | 1.059746 | 0.558397 |
| 6  | Japan  | 2012 | 1.071226 | 0.562936 |
| 7  | Japan  | 2013 | 1.081946 | 0.568402 |
| 8  | Japan  | 2014 | 1.09023  | 0.573894 |
| 9  | Japan  | 2015 | 1.09495  | 0.573838 |
| 10 | Japan  | 2016 | 1.105279 | 0.578573 |
| 11 | Japan  | 2017 | 1.106388 | 0.579657 |
| 12 | Japan  | 2018 | 1.120202 | 0.588741 |
| 13 | Japan  | 2019 | 1.123565 | 0.592949 |
| 14 | Jordan | 1990 | 1.243774 | 1.278353 |
| 15 | Jordan | 1991 | 1.271979 | 1.323684 |
| 16 | Jordan | 1992 | 1.212918 | 1.282366 |
| 17 | Jordan | 1993 | 1.233106 | 1.313997 |
| 18 | Jordan | 1994 | 1.211054 | 1.303852 |
| 19 | Jordan | 1995 | 1.231809 | 1.332617 |
| 20 | Jordan | 1996 | 1.284041 | 1.392659 |
| 21 | Jordan | 1997 | 1.287126 | 1.406764 |
| 22 | Jordan | 1998 | 1.308754 | 1.439609 |
| 23 | Jordan | 1999 | 1.333204 | 1.476799 |
| 24 | Jordan | 2000 | 1.358915 | 1.522114 |
| 25 | Jordan | 2001 | 1.404458 | 1.596437 |
| 26 | Jordan | 2002 | 1.427616 | 1.644192 |
| 27 | Jordan | 2003 | 1.421953 | 1.638204 |
| 28 | Jordan | 2004 | 1.479769 | 1.729284 |
| 29 | Jordan | 2005 | 1.497596 | 1.826894 |
| 30 |        |      |          |          |
| 31 |        |      |          |          |
| 32 |        |      |          |          |
| 33 |        |      |          |          |
| 34 |        |      |          |          |
| 35 |        |      |          |          |
| 36 |        |      |          |          |
| 37 |        |      |          |          |
| 38 |        |      |          |          |
| 39 |        |      |          |          |
| 40 |        |      |          |          |
| 41 |        |      |          |          |
| 42 |        |      |          |          |
| 43 |        |      |          |          |
| 44 |        |      |          |          |
| 45 |        |      |          |          |
| 46 |        |      |          |          |

1  
2  
3  
4  
5  
6  
7  
8  
9  
10  
11  
12  
13  
14  
15  
16  
17  
18  
19  
20  
21  
22  
23  
24  
25  
26  
27  
28  
29  
30  
31  
32  
33  
34  
35  
36  
37  
38  
39  
40  
41  
42  
43  
44  
45  
46

|            |      |          |          |
|------------|------|----------|----------|
| Jordan     | 2006 | 1.443136 | 1.794166 |
| Jordan     | 2007 | 1.234151 | 1.483146 |
| Jordan     | 2008 | 1.106929 | 1.285829 |
| Jordan     | 2009 | 1.019138 | 1.165059 |
| Jordan     | 2010 | 0.948687 | 1.067889 |
| Jordan     | 2011 | 0.940285 | 1.066222 |
| Jordan     | 2012 | 0.951527 | 1.102951 |
| Jordan     | 2013 | 0.966647 | 1.159036 |
| Jordan     | 2014 | 0.973437 | 1.182669 |
| Jordan     | 2015 | 0.936691 | 1.117044 |
| Jordan     | 2016 | 0.952236 | 1.138096 |
| Jordan     | 2017 | 0.970198 | 1.166857 |
| Jordan     | 2018 | 0.973143 | 1.154724 |
| Jordan     | 2019 | 0.982615 | 1.164998 |
| Kazakhstan | 1990 | 0.999933 | 0.671258 |
| Kazakhstan | 1991 | 0.981541 | 0.660741 |
| Kazakhstan | 1992 | 0.97938  | 0.666346 |
| Kazakhstan | 1993 | 0.981365 | 0.670065 |
| Kazakhstan | 1994 | 0.974429 | 0.669119 |
| Kazakhstan | 1995 | 0.950401 | 0.661327 |
| Kazakhstan | 1996 | 0.930785 | 0.656143 |
| Kazakhstan | 1997 | 0.943874 | 0.664252 |
| Kazakhstan | 1998 | 0.935451 | 0.657537 |
| Kazakhstan | 1999 | 0.926939 | 0.650073 |
| Kazakhstan | 2000 | 0.886229 | 0.629965 |

|            |      |          |          |
|------------|------|----------|----------|
| Kazakhstan | 2001 | 0.881548 | 0.629943 |
| Kazakhstan | 2002 | 0.869182 | 0.618695 |
| Kazakhstan | 2003 | 0.840973 | 0.59763  |
| Kazakhstan | 2004 | 0.821565 | 0.586984 |
| Kazakhstan | 2005 | 0.821461 | 0.589292 |
| Kazakhstan | 2006 | 0.811659 | 0.58123  |
| Kazakhstan | 2007 | 0.818429 | 0.578066 |
| Kazakhstan | 2008 | 0.839521 | 0.583216 |
| Kazakhstan | 2009 | 0.85267  | 0.585487 |
| Kazakhstan | 2010 | 0.851782 | 0.57773  |
| Kazakhstan | 2011 | 0.848325 | 0.564973 |
| Kazakhstan | 2012 | 0.849505 | 0.555703 |
| Kazakhstan | 2013 | 0.851565 | 0.5504   |
| Kazakhstan | 2014 | 0.822531 | 0.523314 |
| Kazakhstan | 2015 | 0.844378 | 0.529259 |
| Kazakhstan | 2016 | 0.839327 | 0.522411 |
| Kazakhstan | 2017 | 0.844597 | 0.520727 |
| Kazakhstan | 2018 | 0.828471 | 0.515002 |
| Kazakhstan | 2019 | 0.852281 | 0.536614 |
| Kenya      | 1990 | 0.707017 | 0.669507 |
| Kenya      | 1991 | 0.695049 | 0.65375  |
| Kenya      | 1992 | 0.684015 | 0.637947 |
| Kenya      | 1993 | 0.671695 | 0.620169 |
| Kenya      | 1994 | 0.665955 | 0.607842 |
| Kenya      | 1995 | 0.656889 | 0.59345  |

1  
2  
3  
4  
5  
6  
7  
8  
9  
10  
11  
12  
13  
14  
15  
16  
17  
18  
19  
20  
21  
22  
23  
24  
25  
26  
27  
28  
29  
30  
31  
32  
33  
34  
35  
36  
37  
38  
39  
40  
41  
42  
43  
44  
45  
46

|          |      |          |          |
|----------|------|----------|----------|
| Kenya    | 1996 | 0.646414 | 0.578509 |
| Kenya    | 1997 | 0.645358 | 0.571636 |
| Kenya    | 1998 | 0.63756  | 0.559602 |
| Kenya    | 1999 | 0.632168 | 0.549598 |
| Kenya    | 2000 | 0.629263 | 0.542961 |
| Kenya    | 2001 | 0.63245  | 0.542569 |
| Kenya    | 2002 | 0.638176 | 0.545642 |
| Kenya    | 2003 | 0.642005 | 0.548332 |
| Kenya    | 2004 | 0.640791 | 0.547412 |
| Kenya    | 2005 | 0.640905 | 0.546741 |
| Kenya    | 2006 | 0.638279 | 0.544025 |
| Kenya    | 2007 | 0.639843 | 0.544383 |
| Kenya    | 2008 | 0.641193 | 0.544797 |
| Kenya    | 2009 | 0.64706  | 0.549628 |
| Kenya    | 2010 | 0.662556 | 0.562322 |
| Kenya    | 2011 | 0.682387 | 0.578683 |
| Kenya    | 2012 | 0.703185 | 0.596299 |
| Kenya    | 2013 | 0.725656 | 0.615121 |
| Kenya    | 2014 | 0.743482 | 0.63115  |
| Kenya    | 2015 | 0.759326 | 0.646749 |
| Kenya    | 2016 | 0.766795 | 0.655746 |
| Kenya    | 2017 | 0.775255 | 0.665895 |
| Kenya    | 2018 | 0.781453 | 0.675112 |
| Kenya    | 2019 | 0.784901 | 0.682011 |
| Kiribati | 1990 | 1.4921   | 1.196769 |

|          |      |          |          |
|----------|------|----------|----------|
| Kiribati | 1991 | 1.456679 | 1.172151 |
| Kiribati | 1992 | 1.426989 | 1.152817 |
| Kiribati | 1993 | 1.399922 | 1.134295 |
| Kiribati | 1994 | 1.379383 | 1.119111 |
| Kiribati | 1995 | 1.357045 | 1.1003   |
| Kiribati | 1996 | 1.342688 | 1.088594 |
| Kiribati | 1997 | 1.337935 | 1.081264 |
| Kiribati | 1998 | 1.335628 | 1.075184 |
| Kiribati | 1999 | 1.338924 | 1.073275 |
| Kiribati | 2000 | 1.334341 | 1.064826 |
| Kiribati | 2001 | 1.330727 | 1.059429 |
| Kiribati | 2002 | 1.334753 | 1.061153 |
| Kiribati | 2003 | 1.344028 | 1.068185 |
| Kiribati | 2004 | 1.360788 | 1.08068  |
| Kiribati | 2005 | 1.358904 | 1.078589 |
| Kiribati | 2006 | 1.337353 | 1.06056  |
| Kiribati | 2007 | 1.308545 | 1.039539 |
| Kiribati | 2008 | 1.284763 | 1.019264 |
| Kiribati | 2009 | 1.261421 | 0.998717 |
| Kiribati | 2010 | 1.244095 | 0.982611 |
| Kiribati | 2011 | 1.224451 | 0.964273 |
| Kiribati | 2012 | 1.203869 | 0.946504 |
| Kiribati | 2013 | 1.187289 | 0.931639 |
| Kiribati | 2014 | 1.173134 | 0.918956 |
| Kiribati | 2015 | 1.174871 | 0.919107 |



|    |          |      |          |          |
|----|----------|------|----------|----------|
| 1  |          |      |          |          |
| 2  |          |      |          |          |
| 3  |          |      |          |          |
| 4  |          |      |          |          |
| 5  | Kiribati | 2016 | 1.184607 | 0.925399 |
| 6  | Kiribati | 2017 | 1.193378 | 0.931678 |
| 7  | Kiribati | 2018 | 1.19579  | 0.933418 |
| 8  | Kiribati | 2019 | 1.197517 | 0.934093 |
| 9  | Kuwait   | 1990 | 0.906022 | 1.255995 |
| 10 | Kuwait   | 1991 | 0.892059 | 1.282196 |
| 11 | Kuwait   | 1992 | 0.885625 | 1.259416 |
| 12 | Kuwait   | 1993 | 0.768031 | 1.079664 |
| 13 | Kuwait   | 1994 | 0.721014 | 1.029666 |
| 14 | Kuwait   | 1995 | 0.703499 | 1.018502 |
| 15 | Kuwait   | 1996 | 0.72527  | 1.063488 |
| 16 | Kuwait   | 1997 | 0.668915 | 1.014207 |
| 17 | Kuwait   | 1998 | 0.704428 | 1.07427  |
| 18 | Kuwait   | 1999 | 0.635082 | 0.968802 |
| 19 | Kuwait   | 2000 | 0.636471 | 0.973544 |
| 20 | Kuwait   | 2001 | 0.77434  | 1.188986 |
| 21 | Kuwait   | 2002 | 0.694942 | 1.096564 |
| 22 | Kuwait   | 2003 | 0.673842 | 1.081392 |
| 23 | Kuwait   | 2004 | 0.653702 | 1.044354 |
| 24 | Kuwait   | 2005 | 0.61209  | 0.973403 |
| 25 | Kuwait   | 2006 | 0.597222 | 0.957241 |
| 26 | Kuwait   | 2007 | 0.649274 | 1.040845 |
| 27 | Kuwait   | 2008 | 0.671105 | 1.096313 |
| 28 | Kuwait   | 2009 | 0.757462 | 1.216108 |
| 29 | Kuwait   | 2010 | 0.839781 | 1.32464  |
| 30 |          |      |          |          |
| 31 |          |      |          |          |
| 32 |          |      |          |          |
| 33 |          |      |          |          |
| 34 |          |      |          |          |
| 35 |          |      |          |          |
| 36 |          |      |          |          |
| 37 |          |      |          |          |
| 38 |          |      |          |          |
| 39 |          |      |          |          |
| 40 |          |      |          |          |
| 41 |          |      |          |          |
| 42 |          |      |          |          |
| 43 |          |      |          |          |
| 44 |          |      |          |          |
| 45 |          |      |          |          |
| 46 |          |      |          |          |

|            |      |          |          |
|------------|------|----------|----------|
| Kuwait     | 2011 | 0.862705 | 1.35794  |
| Kuwait     | 2012 | 0.814298 | 1.283671 |
| Kuwait     | 2013 | 0.814568 | 1.285124 |
| Kuwait     | 2014 | 0.84126  | 1.300564 |
| Kuwait     | 2015 | 0.767129 | 1.168468 |
| Kuwait     | 2016 | 0.739668 | 1.118587 |
| Kuwait     | 2017 | 0.726698 | 1.081906 |
| Kuwait     | 2018 | 0.713715 | 1.056145 |
| Kuwait     | 2019 | 0.723676 | 1.037296 |
| Kyrgyzstan | 1990 | 0.891951 | 0.672838 |
| Kyrgyzstan | 1991 | 0.908612 | 0.691176 |
| Kyrgyzstan | 1992 | 0.898784 | 0.681623 |
| Kyrgyzstan | 1993 | 0.850417 | 0.650437 |
| Kyrgyzstan | 1994 | 0.82783  | 0.639884 |
| Kyrgyzstan | 1995 | 0.837243 | 0.653969 |
| Kyrgyzstan | 1996 | 0.834809 | 0.650548 |
| Kyrgyzstan | 1997 | 0.819205 | 0.637971 |
| Kyrgyzstan | 1998 | 0.831842 | 0.648076 |
| Kyrgyzstan | 1999 | 0.840267 | 0.664432 |
| Kyrgyzstan | 2000 | 0.844168 | 0.661815 |
| Kyrgyzstan | 2001 | 0.830856 | 0.658922 |
| Kyrgyzstan | 2002 | 0.828249 | 0.667975 |
| Kyrgyzstan | 2003 | 0.824127 | 0.67254  |
| Kyrgyzstan | 2004 | 0.810225 | 0.669459 |
| Kyrgyzstan | 2005 | 0.806345 | 0.668711 |

1  
2  
3  
4  
5  
6  
7  
8  
9  
10  
11  
12  
13  
14  
15  
16  
17  
18  
19  
20  
21  
22  
23  
24  
25  
26  
27  
28  
29  
30  
31  
32  
33  
34  
35  
36  
37  
38  
39  
40  
41  
42  
43  
44  
45  
46

|                                  |      |          |          |
|----------------------------------|------|----------|----------|
| Kyrgyzstan                       | 2006 | 0.770748 | 0.64556  |
| Kyrgyzstan                       | 2007 | 0.755731 | 0.63405  |
| Kyrgyzstan                       | 2008 | 0.784272 | 0.65742  |
| Kyrgyzstan                       | 2009 | 0.81073  | 0.67425  |
| Kyrgyzstan                       | 2010 | 0.817755 | 0.685054 |
| Kyrgyzstan                       | 2011 | 0.840219 | 0.711408 |
| Kyrgyzstan                       | 2012 | 0.841235 | 0.716805 |
| Kyrgyzstan                       | 2013 | 0.84349  | 0.720402 |
| Kyrgyzstan                       | 2014 | 0.842241 | 0.705299 |
| Kyrgyzstan                       | 2015 | 0.860066 | 0.70151  |
| Kyrgyzstan                       | 2016 | 0.874609 | 0.704633 |
| Kyrgyzstan                       | 2017 | 0.849871 | 0.684358 |
| Kyrgyzstan                       | 2018 | 0.841746 | 0.687493 |
| Kyrgyzstan                       | 2019 | 0.83568  | 0.684807 |
| Lao People's Democratic Republic | 1990 | 1.080257 | 0.904518 |
| Lao People's Democratic Republic | 1991 | 1.079338 | 0.906014 |
| Lao People's Democratic Republic | 1992 | 1.08287  | 0.911731 |
| Lao People's Democratic Republic | 1993 | 1.084715 | 0.916095 |
| Lao People's Democratic Republic | 1994 | 1.087379 | 0.920926 |
| Lao People's Democratic Republic | 1995 | 1.087375 | 0.922831 |
| Lao People's Democratic Republic | 1996 | 1.079552 | 0.918976 |
| Lao People's Democratic Republic | 1997 | 1.072371 | 0.91556  |
| Lao People's Democratic Republic | 1998 | 1.058718 | 0.906658 |
| Lao People's Democratic Republic | 1999 | 1.052176 | 0.902857 |
| Lao People's Democratic Republic | 2000 | 1.036378 | 0.890862 |

|                                  |      |          |          |
|----------------------------------|------|----------|----------|
| Lao People's Democratic Republic | 2001 | 1.02433  | 0.883273 |
| Lao People's Democratic Republic | 2002 | 1.015382 | 0.87784  |
| Lao People's Democratic Republic | 2003 | 1.002093 | 0.869322 |
| Lao People's Democratic Republic | 2004 | 0.99141  | 0.862162 |
| Lao People's Democratic Republic | 2005 | 0.983924 | 0.856121 |
| Lao People's Democratic Republic | 2006 | 0.974171 | 0.850443 |
| Lao People's Democratic Republic | 2007 | 0.969745 | 0.848823 |
| Lao People's Democratic Republic | 2008 | 0.968779 | 0.849477 |
| Lao People's Democratic Republic | 2009 | 0.964921 | 0.846846 |
| Lao People's Democratic Republic | 2010 | 0.962207 | 0.843804 |
| Lao People's Democratic Republic | 2011 | 0.957551 | 0.841215 |
| Lao People's Democratic Republic | 2012 | 0.951021 | 0.838007 |
| Lao People's Democratic Republic | 2013 | 0.947474 | 0.837311 |
| Lao People's Democratic Republic | 2014 | 0.942958 | 0.835606 |
| Lao People's Democratic Republic | 2015 | 0.939503 | 0.833335 |
| Lao People's Democratic Republic | 2016 | 0.936031 | 0.833099 |
| Lao People's Democratic Republic | 2017 | 0.933775 | 0.833237 |
| Lao People's Democratic Republic | 2018 | 0.929921 | 0.831474 |
| Lao People's Democratic Republic | 2019 | 0.927608 | 0.831059 |
| Latvia                           | 1990 | 1.205006 | 0.533461 |
| Latvia                           | 1991 | 1.183017 | 0.522451 |
| Latvia                           | 1992 | 1.1596   | 0.513471 |
| Latvia                           | 1993 | 1.091711 | 0.49012  |
| Latvia                           | 1994 | 1.035137 | 0.470417 |
| Latvia                           | 1995 | 1.061499 | 0.481214 |

|         |      |          |          |
|---------|------|----------|----------|
| Latvia  | 1996 | 1.062243 | 0.487466 |
| Latvia  | 1997 | 1.055513 | 0.488382 |
| Latvia  | 1998 | 1.044571 | 0.489392 |
| Latvia  | 1999 | 1.049745 | 0.491657 |
| Latvia  | 2000 | 1.060367 | 0.490885 |
| Latvia  | 2001 | 1.058915 | 0.492391 |
| Latvia  | 2002 | 1.072686 | 0.496717 |
| Latvia  | 2003 | 1.191884 | 0.544692 |
| Latvia  | 2004 | 1.183538 | 0.544267 |
| Latvia  | 2005 | 1.135283 | 0.525288 |
| Latvia  | 2006 | 1.180254 | 0.548254 |
| Latvia  | 2007 | 1.191916 | 0.549398 |
| Latvia  | 2008 | 1.338475 | 0.604078 |
| Latvia  | 2009 | 1.473186 | 0.665503 |
| Latvia  | 2010 | 1.605934 | 0.719695 |
| Latvia  | 2011 | 1.734377 | 0.76653  |
| Latvia  | 2012 | 1.736977 | 0.761187 |
| Latvia  | 2013 | 1.795712 | 0.787659 |
| Latvia  | 2014 | 1.727391 | 0.755626 |
| Latvia  | 2015 | 1.815508 | 0.792721 |
| Latvia  | 2016 | 1.870149 | 0.814017 |
| Latvia  | 2017 | 1.84377  | 0.808288 |
| Latvia  | 2018 | 1.800032 | 0.794765 |
| Latvia  | 2019 | 1.764838 | 0.785235 |
| Lebanon | 1990 | 1.071467 | 0.981764 |

|         |      |          |          |
|---------|------|----------|----------|
| Lebanon | 1991 | 1.096284 | 1.005245 |
| Lebanon | 1992 | 1.107116 | 1.018167 |
| Lebanon | 1993 | 1.116366 | 1.030655 |
| Lebanon | 1994 | 1.123867 | 1.0433   |
| Lebanon | 1995 | 1.145438 | 1.068906 |
| Lebanon | 1996 | 1.152793 | 1.082827 |
| Lebanon | 1997 | 1.150313 | 1.087767 |
| Lebanon | 1998 | 1.160116 | 1.103824 |
| Lebanon | 1999 | 1.142017 | 1.095643 |
| Lebanon | 2000 | 1.136071 | 1.09651  |
| Lebanon | 2001 | 1.119939 | 1.087568 |
| Lebanon | 2002 | 1.108308 | 1.081466 |
| Lebanon | 2003 | 1.095733 | 1.073018 |
| Lebanon | 2004 | 1.071111 | 1.051902 |
| Lebanon | 2005 | 1.050357 | 1.031778 |
| Lebanon | 2006 | 1.030823 | 1.01005  |
| Lebanon | 2007 | 1.013675 | 0.987874 |
| Lebanon | 2008 | 1.001423 | 0.968311 |
| Lebanon | 2009 | 1.001269 | 0.95813  |
| Lebanon | 2010 | 1.011659 | 0.956166 |
| Lebanon | 2011 | 1.014475 | 0.945418 |
| Lebanon | 2012 | 1.01685  | 0.933202 |
| Lebanon | 2013 | 1.030695 | 0.93028  |
| Lebanon | 2014 | 1.053575 | 0.933731 |
| Lebanon | 2015 | 1.083446 | 0.942194 |

|         |      |          |          |
|---------|------|----------|----------|
| Lebanon | 2016 | 1.11331  | 0.94979  |
| Lebanon | 2017 | 1.146106 | 0.959078 |
| Lebanon | 2018 | 1.180669 | 0.969818 |
| Lebanon | 2019 | 1.214408 | 0.980276 |
| Lesotho | 1990 | 0.547406 | 0.365938 |
| Lesotho | 1991 | 0.542313 | 0.361697 |
| Lesotho | 1992 | 0.533141 | 0.355213 |
| Lesotho | 1993 | 0.52431  | 0.348481 |
| Lesotho | 1994 | 0.507527 | 0.337316 |
| Lesotho | 1995 | 0.487595 | 0.323129 |
| Lesotho | 1996 | 0.460489 | 0.303582 |
| Lesotho | 1997 | 0.433845 | 0.283866 |
| Lesotho | 1998 | 0.4568   | 0.296374 |
| Lesotho | 1999 | 0.483221 | 0.311493 |
| Lesotho | 2000 | 0.541543 | 0.347625 |
| Lesotho | 2001 | 0.554774 | 0.355842 |
| Lesotho | 2002 | 0.580648 | 0.372819 |
| Lesotho | 2003 | 0.628877 | 0.403491 |
| Lesotho | 2004 | 0.639428 | 0.412443 |
| Lesotho | 2005 | 0.656144 | 0.4243   |
| Lesotho | 2006 | 0.657785 | 0.427168 |
| Lesotho | 2007 | 0.674236 | 0.438252 |
| Lesotho | 2008 | 0.701223 | 0.456121 |
| Lesotho | 2009 | 0.707365 | 0.462249 |
| Lesotho | 2010 | 0.71764  | 0.471142 |

|    |         |      |          |          |
|----|---------|------|----------|----------|
| 1  |         |      |          |          |
| 2  |         |      |          |          |
| 3  |         |      |          |          |
| 4  |         |      |          |          |
| 5  | Lesotho | 2011 | 0.721541 | 0.476297 |
| 6  | Lesotho | 2012 | 0.738423 | 0.489759 |
| 7  | Lesotho | 2013 | 0.742987 | 0.495743 |
| 8  | Lesotho | 2014 | 0.740565 | 0.497532 |
| 9  | Lesotho | 2015 | 0.735094 | 0.496563 |
| 10 | Lesotho | 2016 | 0.722892 | 0.490841 |
| 11 | Lesotho | 2017 | 0.711107 | 0.4857   |
| 12 | Lesotho | 2018 | 0.705235 | 0.48378  |
| 13 | Lesotho | 2019 | 0.705917 | 0.485671 |
| 14 | Liberia | 1990 | 0.9085   | 0.996005 |
| 15 | Liberia | 1991 | 0.911296 | 0.998861 |
| 16 | Liberia | 1992 | 0.925106 | 1.011605 |
| 17 | Liberia | 1993 | 0.924282 | 1.008222 |
| 18 | Liberia | 1994 | 0.917343 | 0.998056 |
| 19 | Liberia | 1995 | 0.913325 | 0.981736 |
| 20 | Liberia | 1996 | 0.878938 | 0.937608 |
| 21 | Liberia | 1997 | 0.869847 | 0.918023 |
| 22 | Liberia | 1998 | 0.850108 | 0.894908 |
| 23 | Liberia | 1999 | 0.838556 | 0.881561 |
| 24 | Liberia | 2000 | 0.849539 | 0.884162 |
| 25 | Liberia | 2001 | 0.86329  | 0.889863 |
| 26 | Liberia | 2002 | 0.885972 | 0.907093 |
| 27 | Liberia | 2003 | 0.88833  | 0.908553 |
| 28 | Liberia | 2004 | 0.899159 | 0.919208 |
| 29 | Liberia | 2005 | 0.912469 | 0.924308 |
| 30 |         |      |          |          |
| 31 |         |      |          |          |
| 32 |         |      |          |          |
| 33 |         |      |          |          |
| 34 |         |      |          |          |
| 35 |         |      |          |          |
| 36 |         |      |          |          |
| 37 |         |      |          |          |
| 38 |         |      |          |          |
| 39 |         |      |          |          |
| 40 |         |      |          |          |
| 41 |         |      |          |          |
| 42 |         |      |          |          |
| 43 |         |      |          |          |
| 44 |         |      |          |          |
| 45 |         |      |          |          |
| 46 |         |      |          |          |



1  
2  
3  
4  
5  
6  
7  
8  
9  
10  
11  
12  
13  
14  
15  
16  
17  
18  
19  
20  
21  
22  
23  
24  
25  
26  
27  
28  
29  
30  
31  
32  
33  
34  
35  
36  
37  
38  
39  
40  
41  
42  
43  
44  
45  
46

|         |      |          |          |
|---------|------|----------|----------|
| Liberia | 2006 | 0.92007  | 0.923942 |
| Liberia | 2007 | 0.924098 | 0.921404 |
| Liberia | 2008 | 0.926949 | 0.929499 |
| Liberia | 2009 | 0.922828 | 0.930079 |
| Liberia | 2010 | 0.930016 | 0.935905 |
| Liberia | 2011 | 0.941819 | 0.945008 |
| Liberia | 2012 | 0.942946 | 0.943157 |
| Liberia | 2013 | 0.938623 | 0.938907 |
| Liberia | 2014 | 0.940143 | 0.942135 |
| Liberia | 2015 | 0.942099 | 0.941489 |
| Liberia | 2016 | 0.950782 | 0.94713  |
| Liberia | 2017 | 0.957875 | 0.950271 |
| Liberia | 2018 | 0.960514 | 0.9517   |
| Liberia | 2019 | 0.96058  | 0.953451 |
| Libya   | 1990 | 1.055999 | 1.102401 |
| Libya   | 1991 | 1.061455 | 1.107185 |
| Libya   | 1992 | 1.031746 | 1.074807 |
| Libya   | 1993 | 1.021858 | 1.061961 |
| Libya   | 1994 | 1.014832 | 1.051481 |
| Libya   | 1995 | 1.008831 | 1.042201 |
| Libya   | 1996 | 1.016403 | 1.048683 |
| Libya   | 1997 | 1.000094 | 1.031347 |
| Libya   | 1998 | 0.991815 | 1.025339 |
| Libya   | 1999 | 0.982479 | 1.020405 |
| Libya   | 2000 | 0.97538  | 1.013309 |

|           |      |          |          |
|-----------|------|----------|----------|
| Libya     | 2001 | 0.934374 | 0.965433 |
| Libya     | 2002 | 0.904144 | 0.92635  |
| Libya     | 2003 | 0.899903 | 0.916303 |
| Libya     | 2004 | 0.962226 | 0.97716  |
| Libya     | 2005 | 1.003809 | 1.021942 |
| Libya     | 2006 | 1.022    | 1.036288 |
| Libya     | 2007 | 1.116889 | 1.122346 |
| Libya     | 2008 | 1.143164 | 1.149181 |
| Libya     | 2009 | 1.226991 | 1.228515 |
| Libya     | 2010 | 1.20636  | 1.206442 |
| Libya     | 2011 | 1.189759 | 1.190245 |
| Libya     | 2012 | 1.216209 | 1.220529 |
| Libya     | 2013 | 1.219613 | 1.224468 |
| Libya     | 2014 | 1.214545 | 1.220811 |
| Libya     | 2015 | 1.225026 | 1.231131 |
| Libya     | 2016 | 1.228146 | 1.234103 |
| Libya     | 2017 | 1.223734 | 1.228194 |
| Libya     | 2018 | 1.220224 | 1.223662 |
| Libya     | 2019 | 1.214728 | 1.216594 |
| Lithuania | 1990 | 0.971313 | 0.540179 |
| Lithuania | 1991 | 0.985477 | 0.54626  |
| Lithuania | 1992 | 0.989442 | 0.546932 |
| Lithuania | 1993 | 0.949626 | 0.53415  |
| Lithuania | 1994 | 0.96797  | 0.550823 |
| Lithuania | 1995 | 1.00168  | 0.568811 |

1  
2  
3  
4  
5  
6  
7  
8  
9  
10  
11  
12  
13  
14  
15  
16  
17  
18  
19  
20  
21  
22  
23  
24  
25  
26  
27  
28  
29  
30  
31  
32  
33  
34  
35  
36  
37  
38  
39  
40  
41  
42  
43  
44  
45  
46

|            |      |          |          |
|------------|------|----------|----------|
| Lithuania  | 1996 | 1.019597 | 0.571551 |
| Lithuania  | 1997 | 1.05621  | 0.584609 |
| Lithuania  | 1998 | 1.055637 | 0.581885 |
| Lithuania  | 1999 | 1.050745 | 0.578728 |
| Lithuania  | 2000 | 1.057401 | 0.578423 |
| Lithuania  | 2001 | 1.067042 | 0.580847 |
| Lithuania  | 2002 | 1.080398 | 0.579941 |
| Lithuania  | 2003 | 1.136544 | 0.606356 |
| Lithuania  | 2004 | 1.103524 | 0.587737 |
| Lithuania  | 2005 | 1.084225 | 0.579263 |
| Lithuania  | 2006 | 1.113196 | 0.594664 |
| Lithuania  | 2007 | 1.096276 | 0.583299 |
| Lithuania  | 2008 | 1.198771 | 0.624744 |
| Lithuania  | 2009 | 1.229255 | 0.622287 |
| Lithuania  | 2010 | 1.21543  | 0.605984 |
| Lithuania  | 2011 | 1.22594  | 0.611089 |
| Lithuania  | 2012 | 1.243841 | 0.615975 |
| Lithuania  | 2013 | 1.228526 | 0.60492  |
| Lithuania  | 2014 | 1.242323 | 0.608617 |
| Lithuania  | 2015 | 1.266152 | 0.620736 |
| Lithuania  | 2016 | 1.250372 | 0.614161 |
| Lithuania  | 2017 | 1.337779 | 0.654176 |
| Lithuania  | 2018 | 1.319187 | 0.645546 |
| Lithuania  | 2019 | 1.350657 | 0.661003 |
| Luxembourg | 1990 | 1.393482 | 0.713825 |

|            |      |          |          |
|------------|------|----------|----------|
| Luxembourg | 1991 | 1.405872 | 0.718466 |
| Luxembourg | 1992 | 1.45974  | 0.741392 |
| Luxembourg | 1993 | 1.457165 | 0.737255 |
| Luxembourg | 1994 | 1.465173 | 0.734587 |
| Luxembourg | 1995 | 1.498477 | 0.746412 |
| Luxembourg | 1996 | 1.532323 | 0.762892 |
| Luxembourg | 1997 | 1.541765 | 0.767401 |
| Luxembourg | 1998 | 1.53696  | 0.763833 |
| Luxembourg | 1999 | 1.557634 | 0.771755 |
| Luxembourg | 2000 | 1.583232 | 0.780806 |
| Luxembourg | 2001 | 1.629875 | 0.804553 |
| Luxembourg | 2002 | 1.58333  | 0.786575 |
| Luxembourg | 2003 | 1.541825 | 0.764156 |
| Luxembourg | 2004 | 1.542719 | 0.759595 |
| Luxembourg | 2005 | 1.564119 | 0.7683   |
| Luxembourg | 2006 | 1.568078 | 0.772499 |
| Luxembourg | 2007 | 1.574228 | 0.78169  |
| Luxembourg | 2008 | 1.559942 | 0.780138 |
| Luxembourg | 2009 | 1.486968 | 0.747579 |
| Luxembourg | 2010 | 1.461338 | 0.738203 |
| Luxembourg | 2011 | 1.483877 | 0.760491 |
| Luxembourg | 2012 | 1.434736 | 0.751165 |
| Luxembourg | 2013 | 1.437263 | 0.769188 |
| Luxembourg | 2014 | 1.436678 | 0.781738 |
| Luxembourg | 2015 | 1.449766 | 0.795169 |

|    |            |      |          |          |
|----|------------|------|----------|----------|
| 1  |            |      |          |          |
| 2  |            |      |          |          |
| 3  |            |      |          |          |
| 4  |            |      |          |          |
| 5  | Luxembourg | 2016 | 1.452105 | 0.803893 |
| 6  | Luxembourg | 2017 | 1.424215 | 0.802565 |
| 7  | Luxembourg | 2018 | 1.395836 | 0.799804 |
| 8  | Luxembourg | 2019 | 1.372174 | 0.796658 |
| 9  | Madagascar | 1990 | 0.654498 | 0.630902 |
| 10 | Madagascar | 1991 | 0.665058 | 0.636322 |
| 11 | Madagascar | 1992 | 0.679494 | 0.646495 |
| 12 | Madagascar | 1993 | 0.674667 | 0.639008 |
| 13 | Madagascar | 1994 | 0.673359 | 0.633825 |
| 14 | Madagascar | 1995 | 0.672929 | 0.631342 |
| 15 | Madagascar | 1996 | 0.669081 | 0.625767 |
| 16 | Madagascar | 1997 | 0.68748  | 0.638721 |
| 17 | Madagascar | 1998 | 0.690612 | 0.638743 |
| 18 | Madagascar | 1999 | 0.690685 | 0.635064 |
| 19 | Madagascar | 2000 | 0.704869 | 0.643978 |
| 20 | Madagascar | 2001 | 0.712433 | 0.64898  |
| 21 | Madagascar | 2002 | 0.730031 | 0.662803 |
| 22 | Madagascar | 2003 | 0.730674 | 0.662693 |
| 23 | Madagascar | 2004 | 0.739866 | 0.667256 |
| 24 | Madagascar | 2005 | 0.736319 | 0.660275 |
| 25 | Madagascar | 2006 | 0.730087 | 0.65173  |
| 26 | Madagascar | 2007 | 0.726425 | 0.64593  |
| 27 | Madagascar | 2008 | 0.72202  | 0.640593 |
| 28 | Madagascar | 2009 | 0.728877 | 0.645161 |
| 29 | Madagascar | 2010 | 0.734435 | 0.649298 |
| 30 |            |      |          |          |
| 31 |            |      |          |          |
| 32 |            |      |          |          |
| 33 |            |      |          |          |
| 34 |            |      |          |          |
| 35 |            |      |          |          |
| 36 |            |      |          |          |
| 37 |            |      |          |          |
| 38 |            |      |          |          |
| 39 |            |      |          |          |
| 40 |            |      |          |          |
| 41 |            |      |          |          |
| 42 |            |      |          |          |
| 43 |            |      |          |          |
| 44 |            |      |          |          |
| 45 |            |      |          |          |
| 46 |            |      |          |          |

|    |            |      |          |          |
|----|------------|------|----------|----------|
| 1  |            |      |          |          |
| 2  |            |      |          |          |
| 3  |            |      |          |          |
| 4  |            |      |          |          |
| 5  | Madagascar | 2011 | 0.741916 | 0.654738 |
| 6  | Madagascar | 2012 | 0.749575 | 0.661406 |
| 7  | Madagascar | 2013 | 0.756602 | 0.668668 |
| 8  | Madagascar | 2014 | 0.764441 | 0.6762   |
| 9  | Madagascar | 2015 | 0.770191 | 0.682863 |
| 10 | Madagascar | 2016 | 0.774117 | 0.690311 |
| 11 | Madagascar | 2017 | 0.779615 | 0.698152 |
| 12 | Madagascar | 2018 | 0.78173  | 0.702984 |
| 13 | Madagascar | 2019 | 0.783939 | 0.70848  |
| 14 | Madagascar | 2019 | 0.783939 | 0.70848  |
| 15 | Malawi     | 1990 | 0.863324 | 0.714457 |
| 16 | Malawi     | 1991 | 0.838268 | 0.692198 |
| 17 | Malawi     | 1992 | 0.814011 | 0.670492 |
| 18 | Malawi     | 1993 | 0.796118 | 0.651846 |
| 19 | Malawi     | 1994 | 0.780322 | 0.635558 |
| 20 | Malawi     | 1995 | 0.762866 | 0.621129 |
| 21 | Malawi     | 1996 | 0.748306 | 0.610385 |
| 22 | Malawi     | 1997 | 0.734158 | 0.599556 |
| 23 | Malawi     | 1998 | 0.72624  | 0.593395 |
| 24 | Malawi     | 1999 | 0.724455 | 0.586929 |
| 25 | Malawi     | 2000 | 0.715552 | 0.575648 |
| 26 | Malawi     | 2001 | 0.705807 | 0.565471 |
| 27 | Malawi     | 2002 | 0.70057  | 0.558742 |
| 28 | Malawi     | 2003 | 0.700275 | 0.556185 |
| 29 | Malawi     | 2004 | 0.690505 | 0.54759  |
| 30 | Malawi     | 2005 | 0.684543 | 0.540365 |
| 31 | Malawi     | 2005 | 0.684543 | 0.540365 |
| 32 |            |      |          |          |
| 33 |            |      |          |          |
| 34 |            |      |          |          |
| 35 |            |      |          |          |
| 36 |            |      |          |          |
| 37 |            |      |          |          |
| 38 |            |      |          |          |
| 39 |            |      |          |          |
| 40 |            |      |          |          |
| 41 |            |      |          |          |
| 42 |            |      |          |          |
| 43 |            |      |          |          |
| 44 |            |      |          |          |
| 45 |            |      |          |          |
| 46 |            |      |          |          |

1  
2  
3  
4  
5  
6  
7  
8  
9  
10  
11  
12  
13  
14  
15  
16  
17  
18  
19  
20  
21  
22  
23  
24  
25  
26  
27  
28  
29  
30  
31  
32  
33  
34  
35  
36  
37  
38  
39  
40  
41  
42  
43  
44  
45  
46

|          |      |          |          |
|----------|------|----------|----------|
| Malawi   | 2006 | 0.682796 | 0.534722 |
| Malawi   | 2007 | 0.686828 | 0.535867 |
| Malawi   | 2008 | 0.697033 | 0.54052  |
| Malawi   | 2009 | 0.707276 | 0.54586  |
| Malawi   | 2010 | 0.71033  | 0.546968 |
| Malawi   | 2011 | 0.714983 | 0.54886  |
| Malawi   | 2012 | 0.724143 | 0.555918 |
| Malawi   | 2013 | 0.733413 | 0.563464 |
| Malawi   | 2014 | 0.737841 | 0.569168 |
| Malawi   | 2015 | 0.74575  | 0.576821 |
| Malawi   | 2016 | 0.748773 | 0.583159 |
| Malawi   | 2017 | 0.754559 | 0.591801 |
| Malawi   | 2018 | 0.760637 | 0.599123 |
| Malawi   | 2019 | 0.765263 | 0.605597 |
| Malaysia | 1990 | 0.819196 | 0.788761 |
| Malaysia | 1991 | 0.846018 | 0.816191 |
| Malaysia | 1992 | 0.886443 | 0.853191 |
| Malaysia | 1993 | 0.94471  | 0.913312 |
| Malaysia | 1994 | 0.975225 | 0.954186 |
| Malaysia | 1995 | 0.982179 | 0.948723 |
| Malaysia | 1996 | 0.950804 | 0.889981 |
| Malaysia | 1997 | 0.965724 | 0.902726 |
| Malaysia | 1998 | 1.026153 | 0.991537 |
| Malaysia | 1999 | 1.047448 | 1.026159 |
| Malaysia | 2000 | 1.034293 | 1.007025 |

|    |          |      |          |          |
|----|----------|------|----------|----------|
| 1  |          |      |          |          |
| 2  |          |      |          |          |
| 3  |          |      |          |          |
| 4  |          |      |          |          |
| 5  | Malaysia | 2001 | 1.027312 | 0.987668 |
| 6  | Malaysia | 2002 | 1.078764 | 1.04399  |
| 7  | Malaysia | 2003 | 1.063797 | 1.039922 |
| 8  | Malaysia | 2004 | 1.060262 | 1.061847 |
| 9  | Malaysia | 2005 | 1.066861 | 1.080876 |
| 10 | Malaysia | 2006 | 1.07099  | 1.094214 |
| 11 | Malaysia | 2007 | 1.072336 | 1.107498 |
| 12 | Malaysia | 2008 | 1.059789 | 1.110449 |
| 13 | Malaysia | 2009 | 1.063617 | 1.123318 |
| 14 | Malaysia | 2010 | 1.057671 | 1.11054  |
| 15 | Malaysia | 2011 | 1.04982  | 1.098519 |
| 16 | Malaysia | 2012 | 1.067402 | 1.137766 |
| 17 | Malaysia | 2013 | 1.064808 | 1.180301 |
| 18 | Malaysia | 2014 | 1.056546 | 1.179    |
| 19 | Malaysia | 2015 | 1.053687 | 1.173967 |
| 20 | Malaysia | 2016 | 1.045563 | 1.136786 |
| 21 | Malaysia | 2017 | 1.04171  | 1.122423 |
| 22 | Malaysia | 2018 | 1.044457 | 1.117039 |
| 23 | Malaysia | 2019 | 1.041762 | 1.08757  |
| 24 | Maldives | 1990 | 0.963518 | 1.206453 |
| 25 | Maldives | 1991 | 0.972691 | 1.238021 |
| 26 | Maldives | 1992 | 0.98505  | 1.276931 |
| 27 | Maldives | 1993 | 0.95509  | 1.239805 |
| 28 | Maldives | 1994 | 0.900192 | 1.140108 |
| 29 | Maldives | 1995 | 0.914347 | 1.166679 |
| 30 |          |      |          |          |
| 31 |          |      |          |          |
| 32 |          |      |          |          |
| 33 |          |      |          |          |
| 34 |          |      |          |          |
| 35 |          |      |          |          |
| 36 |          |      |          |          |
| 37 |          |      |          |          |
| 38 |          |      |          |          |
| 39 |          |      |          |          |
| 40 |          |      |          |          |
| 41 |          |      |          |          |
| 42 |          |      |          |          |
| 43 |          |      |          |          |
| 44 |          |      |          |          |
| 45 |          |      |          |          |
| 46 |          |      |          |          |



1  
2  
3  
4  
5  
6  
7  
8  
9  
10  
11  
12  
13  
14  
15  
16  
17  
18  
19  
20  
21  
22  
23  
24  
25  
26  
27  
28  
29  
30  
31  
32  
33  
34  
35  
36  
37  
38  
39  
40  
41  
42  
43  
44  
45  
46

|          |      |          |          |
|----------|------|----------|----------|
| Maldives | 1996 | 0.962101 | 1.260357 |
| Maldives | 1997 | 0.99324  | 1.318302 |
| Maldives | 1998 | 0.950574 | 1.23224  |
| Maldives | 1999 | 0.950123 | 1.207546 |
| Maldives | 2000 | 0.963335 | 1.233702 |
| Maldives | 2001 | 0.952392 | 1.219721 |
| Maldives | 2002 | 0.85437  | 1.079451 |
| Maldives | 2003 | 0.855313 | 1.076779 |
| Maldives | 2004 | 0.863548 | 1.078919 |
| Maldives | 2005 | 0.867198 | 1.075533 |
| Maldives | 2006 | 0.878145 | 1.082157 |
| Maldives | 2007 | 0.896513 | 1.09889  |
| Maldives | 2008 | 0.915916 | 1.116226 |
| Maldives | 2009 | 0.944785 | 1.145004 |
| Maldives | 2010 | 0.961791 | 1.162282 |
| Maldives | 2011 | 0.957437 | 1.155309 |
| Maldives | 2012 | 0.951009 | 1.149364 |
| Maldives | 2013 | 0.938156 | 1.13562  |
| Maldives | 2014 | 0.919664 | 1.11528  |
| Maldives | 2015 | 0.897286 | 1.09207  |
| Maldives | 2016 | 0.902015 | 1.100388 |
| Maldives | 2017 | 0.903999 | 1.105606 |
| Maldives | 2018 | 0.905796 | 1.110964 |
| Maldives | 2019 | 0.90613  | 1.11559  |
| Mali     | 1990 | 1.052152 | 0.960348 |

|      |      |          |          |
|------|------|----------|----------|
| Mali | 1991 | 1.049099 | 0.963432 |
| Mali | 1992 | 1.04031  | 0.962519 |
| Mali | 1993 | 1.024426 | 0.95587  |
| Mali | 1994 | 1.014837 | 0.953214 |
| Mali | 1995 | 1.01442  | 0.958046 |
| Mali | 1996 | 1.009798 | 0.959951 |
| Mali | 1997 | 1.013619 | 0.970303 |
| Mali | 1998 | 1.006038 | 0.969867 |
| Mali | 1999 | 0.988446 | 0.959086 |
| Mali | 2000 | 0.979709 | 0.955419 |
| Mali | 2001 | 0.967442 | 0.950056 |
| Mali | 2002 | 0.956589 | 0.943906 |
| Mali | 2003 | 0.948678 | 0.941863 |
| Mali | 2004 | 0.931661 | 0.929066 |
| Mali | 2005 | 0.920049 | 0.920402 |
| Mali | 2006 | 0.912475 | 0.915756 |
| Mali | 2007 | 0.896128 | 0.902561 |
| Mali | 2008 | 0.880758 | 0.889383 |
| Mali | 2009 | 0.8671   | 0.8774   |
| Mali | 2010 | 0.862463 | 0.874125 |
| Mali | 2011 | 0.861756 | 0.875638 |
| Mali | 2012 | 0.860395 | 0.876241 |
| Mali | 2013 | 0.852067 | 0.868954 |
| Mali | 2014 | 0.849678 | 0.868136 |
| Mali | 2015 | 0.842445 | 0.862383 |

1  
2  
3  
4  
5  
6  
7  
8  
9  
10  
11  
12  
13  
14  
15  
16  
17  
18  
19  
20  
21  
22  
23  
24  
25  
26  
27  
28  
29  
30  
31  
32  
33  
34  
35  
36  
37  
38  
39  
40  
41  
42  
43  
44  
45  
46

|       |      |          |          |
|-------|------|----------|----------|
| Mali  | 2016 | 0.832439 | 0.855942 |
| Mali  | 2017 | 0.822786 | 0.849405 |
| Mali  | 2018 | 0.827136 | 0.855255 |
| Mali  | 2019 | 0.830844 | 0.85997  |
| Malta | 1990 | 1.008276 | 0.651471 |
| Malta | 1991 | 1.030094 | 0.651632 |
| Malta | 1992 | 1.060652 | 0.662053 |
| Malta | 1993 | 1.091122 | 0.675794 |
| Malta | 1994 | 1.154814 | 0.722773 |
| Malta | 1995 | 1.172958 | 0.735947 |
| Malta | 1996 | 1.138106 | 0.716251 |
| Malta | 1997 | 1.119391 | 0.702479 |
| Malta | 1998 | 1.163283 | 0.728761 |
| Malta | 1999 | 1.16292  | 0.731829 |
| Malta | 2000 | 1.163634 | 0.732145 |
| Malta | 2001 | 1.136787 | 0.714885 |
| Malta | 2002 | 1.094725 | 0.687322 |
| Malta | 2003 | 1.085162 | 0.685129 |
| Malta | 2004 | 1.089569 | 0.692118 |
| Malta | 2005 | 1.035043 | 0.659262 |
| Malta | 2006 | 1.047596 | 0.668544 |
| Malta | 2007 | 1.038632 | 0.664038 |
| Malta | 2008 | 1.016727 | 0.651006 |
| Malta | 2009 | 1.034098 | 0.663307 |
| Malta | 2010 | 1.009965 | 0.647124 |

|    |                  |      |          |          |
|----|------------------|------|----------|----------|
| 1  |                  |      |          |          |
| 2  |                  |      |          |          |
| 3  |                  |      |          |          |
| 4  |                  |      |          |          |
| 5  | Malta            | 2011 | 1.002912 | 0.643467 |
| 6  | Malta            | 2012 | 1.017241 | 0.650393 |
| 7  | Malta            | 2013 | 1.027006 | 0.65451  |
| 8  | Malta            | 2014 | 1.031116 | 0.659429 |
| 9  | Malta            | 2015 | 1.140398 | 0.725348 |
| 10 | Malta            | 2016 | 1.132609 | 0.72308  |
| 11 | Malta            | 2017 | 1.126121 | 0.720151 |
| 12 | Malta            | 2018 | 1.114579 | 0.716802 |
| 13 | Malta            | 2019 | 1.098586 | 0.713248 |
| 14 | Malta            | 2019 | 1.098586 | 0.713248 |
| 15 | Malta            | 2019 | 1.098586 | 0.713248 |
| 16 | Malta            | 2019 | 1.098586 | 0.713248 |
| 17 | Marshall Islands | 1990 | 0.829497 | 0.73961  |
| 18 | Marshall Islands | 1991 | 0.84873  | 0.754036 |
| 19 | Marshall Islands | 1992 | 0.862116 | 0.764425 |
| 20 | Marshall Islands | 1993 | 0.895229 | 0.794611 |
| 21 | Marshall Islands | 1994 | 1.000765 | 0.922647 |
| 22 | Marshall Islands | 1995 | 1.014702 | 0.941943 |
| 23 | Marshall Islands | 1996 | 1.041135 | 0.970383 |
| 24 | Marshall Islands | 1997 | 1.044842 | 0.980008 |
| 25 | Marshall Islands | 1998 | 1.04679  | 0.986713 |
| 26 | Marshall Islands | 1999 | 1.041891 | 0.986813 |
| 27 | Marshall Islands | 2000 | 1.037892 | 0.986503 |
| 28 | Marshall Islands | 2001 | 1.034632 | 0.986928 |
| 29 | Marshall Islands | 2002 | 1.035458 | 0.991621 |
| 30 | Marshall Islands | 2003 | 1.033946 | 0.994506 |
| 31 | Marshall Islands | 2004 | 1.043391 | 1.007015 |
| 32 | Marshall Islands | 2005 | 1.033638 | 1.00178  |
| 33 | Marshall Islands | 2005 | 1.033638 | 1.00178  |
| 34 | Marshall Islands | 2005 | 1.033638 | 1.00178  |
| 35 | Marshall Islands | 2005 | 1.033638 | 1.00178  |
| 36 | Marshall Islands | 2005 | 1.033638 | 1.00178  |
| 37 | Marshall Islands | 2005 | 1.033638 | 1.00178  |
| 38 | Marshall Islands | 2005 | 1.033638 | 1.00178  |
| 39 |                  |      |          |          |
| 40 |                  |      |          |          |
| 41 |                  |      |          |          |
| 42 |                  |      |          |          |
| 43 |                  |      |          |          |
| 44 |                  |      |          |          |
| 45 |                  |      |          |          |
| 46 |                  |      |          |          |

1  
2  
3  
4  
5  
6  
7  
8  
9  
10  
11  
12  
13  
14  
15  
16  
17  
18  
19  
20  
21  
22  
23  
24  
25  
26  
27  
28  
29  
30  
31  
32  
33  
34  
35  
36  
37  
38  
39  
40  
41  
42  
43  
44  
45  
46

|                  |      |          |          |
|------------------|------|----------|----------|
| Marshall Islands | 2006 | 1.024225 | 0.996898 |
| Marshall Islands | 2007 | 1.005892 | 0.982809 |
| Marshall Islands | 2008 | 0.989552 | 0.970255 |
| Marshall Islands | 2009 | 0.978998 | 0.962731 |
| Marshall Islands | 2010 | 0.973948 | 0.960239 |
| Marshall Islands | 2011 | 0.966812 | 0.954487 |
| Marshall Islands | 2012 | 0.960175 | 0.948971 |
| Marshall Islands | 2013 | 0.955867 | 0.945321 |
| Marshall Islands | 2014 | 0.950784 | 0.939663 |
| Marshall Islands | 2015 | 0.947166 | 0.936217 |
| Marshall Islands | 2016 | 0.946444 | 0.934338 |
| Marshall Islands | 2017 | 0.948871 | 0.935285 |
| Marshall Islands | 2018 | 0.94816  | 0.933495 |
| Marshall Islands | 2019 | 0.948073 | 0.931827 |
| Mauritania       | 1990 | 1.292419 | 1.123301 |
| Mauritania       | 1991 | 1.304114 | 1.144613 |
| Mauritania       | 1992 | 1.311313 | 1.163473 |
| Mauritania       | 1993 | 1.316344 | 1.181659 |
| Mauritania       | 1994 | 1.321783 | 1.193751 |
| Mauritania       | 1995 | 1.330612 | 1.208804 |
| Mauritania       | 1996 | 1.334792 | 1.220411 |
| Mauritania       | 1997 | 1.337735 | 1.23014  |
| Mauritania       | 1998 | 1.342861 | 1.23923  |
| Mauritania       | 1999 | 1.355719 | 1.257931 |
| Mauritania       | 2000 | 1.354422 | 1.266274 |

|            |      |          |          |
|------------|------|----------|----------|
| Mauritania | 2001 | 1.338039 | 1.263431 |
| Mauritania | 2002 | 1.326071 | 1.263031 |
| Mauritania | 2003 | 1.32429  | 1.269958 |
| Mauritania | 2004 | 1.312932 | 1.26527  |
| Mauritania | 2005 | 1.308692 | 1.266842 |
| Mauritania | 2006 | 1.304456 | 1.274066 |
| Mauritania | 2007 | 1.286568 | 1.263329 |
| Mauritania | 2008 | 1.259677 | 1.245972 |
| Mauritania | 2009 | 1.226907 | 1.223864 |
| Mauritania | 2010 | 1.206542 | 1.21002  |
| Mauritania | 2011 | 1.194471 | 1.198175 |
| Mauritania | 2012 | 1.18269  | 1.187555 |
| Mauritania | 2013 | 1.170872 | 1.180314 |
| Mauritania | 2014 | 1.181396 | 1.189417 |
| Mauritania | 2015 | 1.185942 | 1.195127 |
| Mauritania | 2016 | 1.190154 | 1.203213 |
| Mauritania | 2017 | 1.186943 | 1.204661 |
| Mauritania | 2018 | 1.18427  | 1.206028 |
| Mauritania | 2019 | 1.182881 | 1.204325 |
| Mauritius  | 1990 | 0.93321  | 0.754336 |
| Mauritius  | 1991 | 0.950503 | 0.755029 |
| Mauritius  | 1992 | 1.044833 | 0.830833 |
| Mauritius  | 1993 | 0.972502 | 0.775092 |
| Mauritius  | 1994 | 0.996268 | 0.7839   |
| Mauritius  | 1995 | 0.988114 | 0.789355 |

|           |      |          |          |
|-----------|------|----------|----------|
| Mauritius | 1996 | 0.923973 | 0.738861 |
| Mauritius | 1997 | 0.899823 | 0.699261 |
| Mauritius | 1998 | 0.910683 | 0.702415 |
| Mauritius | 1999 | 0.928566 | 0.717855 |
| Mauritius | 2000 | 0.995053 | 0.77431  |
| Mauritius | 2001 | 0.979239 | 0.769047 |
| Mauritius | 2002 | 0.899328 | 0.7055   |
| Mauritius | 2003 | 0.943053 | 0.733968 |
| Mauritius | 2004 | 0.925262 | 0.723859 |
| Mauritius | 2005 | 0.92733  | 0.727248 |
| Mauritius | 2006 | 0.942548 | 0.745284 |
| Mauritius | 2007 | 0.934733 | 0.753928 |
| Mauritius | 2008 | 0.902499 | 0.735209 |
| Mauritius | 2009 | 0.855919 | 0.696554 |
| Mauritius | 2010 | 0.884717 | 0.710758 |
| Mauritius | 2011 | 0.843754 | 0.678107 |
| Mauritius | 2012 | 0.895397 | 0.714052 |
| Mauritius | 2013 | 0.870548 | 0.695416 |
| Mauritius | 2014 | 0.872555 | 0.701738 |
| Mauritius | 2015 | 0.849229 | 0.685232 |
| Mauritius | 2016 | 0.828713 | 0.669571 |
| Mauritius | 2017 | 0.889327 | 0.717066 |
| Mauritius | 2018 | 0.873638 | 0.706288 |
| Mauritius | 2019 | 0.865816 | 0.699819 |
| Mexico    | 1990 | 1.078398 | 1.048632 |

|        |      |          |          |
|--------|------|----------|----------|
| Mexico | 1991 | 1.075019 | 1.040023 |
| Mexico | 1992 | 1.086669 | 1.043003 |
| Mexico | 1993 | 1.091016 | 1.040778 |
| Mexico | 1994 | 1.082324 | 1.027802 |
| Mexico | 1995 | 1.095406 | 1.033573 |
| Mexico | 1996 | 1.094571 | 1.026731 |
| Mexico | 1997 | 1.094724 | 1.022765 |
| Mexico | 1998 | 1.102235 | 1.022629 |
| Mexico | 1999 | 1.120489 | 1.033242 |
| Mexico | 2000 | 1.097268 | 1.009582 |
| Mexico | 2001 | 1.101573 | 1.009819 |
| Mexico | 2002 | 1.080918 | 0.987715 |
| Mexico | 2003 | 1.074058 | 0.97873  |
| Mexico | 2004 | 1.071029 | 0.974993 |
| Mexico | 2005 | 1.053626 | 0.959082 |
| Mexico | 2006 | 1.049174 | 0.953395 |
| Mexico | 2007 | 1.047691 | 0.950921 |
| Mexico | 2008 | 1.020609 | 0.923375 |
| Mexico | 2009 | 1.031489 | 0.928038 |
| Mexico | 2010 | 1.033104 | 0.92865  |
| Mexico | 2011 | 1.016719 | 0.911677 |
| Mexico | 2012 | 1.010454 | 0.902523 |
| Mexico | 2013 | 0.984236 | 0.875506 |
| Mexico | 2014 | 0.978046 | 0.867256 |
| Mexico | 2015 | 0.960093 | 0.848844 |



|                                  |      |          |          |
|----------------------------------|------|----------|----------|
| Mexico                           | 2016 | 0.946389 | 0.834406 |
| Mexico                           | 2017 | 0.919663 | 0.808347 |
| Mexico                           | 2018 | 0.92066  | 0.806294 |
| Mexico                           | 2019 | 0.912661 | 0.794804 |
| Micronesia (Federated States of) | 1990 | 1.044948 | 0.976014 |
| Micronesia (Federated States of) | 1991 | 1.063367 | 0.987065 |
| Micronesia (Federated States of) | 1992 | 1.085287 | 1.00053  |
| Micronesia (Federated States of) | 1993 | 1.104225 | 1.010412 |
| Micronesia (Federated States of) | 1994 | 1.127485 | 1.023454 |
| Micronesia (Federated States of) | 1995 | 1.154087 | 1.039054 |
| Micronesia (Federated States of) | 1996 | 1.175387 | 1.049479 |
| Micronesia (Federated States of) | 1997 | 1.192982 | 1.057541 |
| Micronesia (Federated States of) | 1998 | 1.205251 | 1.061571 |
| Micronesia (Federated States of) | 1999 | 1.216182 | 1.065192 |
| Micronesia (Federated States of) | 2000 | 1.22136  | 1.064296 |
| Micronesia (Federated States of) | 2001 | 1.227829 | 1.06496  |
| Micronesia (Federated States of) | 2002 | 1.23739  | 1.069029 |
| Micronesia (Federated States of) | 2003 | 1.224554 | 1.054574 |
| Micronesia (Federated States of) | 2004 | 1.221401 | 1.049043 |
| Micronesia (Federated States of) | 2005 | 1.212073 | 1.039666 |
| Micronesia (Federated States of) | 2006 | 1.227931 | 1.050787 |
| Micronesia (Federated States of) | 2007 | 1.19562  | 1.021078 |
| Micronesia (Federated States of) | 2008 | 1.162752 | 0.99167  |
| Micronesia (Federated States of) | 2009 | 1.129838 | 0.96289  |
| Micronesia (Federated States of) | 2010 | 1.101329 | 0.937482 |

|    |                                  |      |          |          |
|----|----------------------------------|------|----------|----------|
| 1  |                                  |      |          |          |
| 2  |                                  |      |          |          |
| 3  |                                  |      |          |          |
| 4  |                                  |      |          |          |
| 5  | Micronesia (Federated States of) | 2011 | 1.064706 | 0.907    |
| 6  | Micronesia (Federated States of) | 2012 | 1.034839 | 0.882568 |
| 7  | Micronesia (Federated States of) | 2013 | 1.009272 | 0.861923 |
| 8  | Micronesia (Federated States of) | 2014 | 0.988996 | 0.845971 |
| 9  | Micronesia (Federated States of) | 2015 | 0.97729  | 0.835961 |
| 10 | Micronesia (Federated States of) | 2016 | 0.962942 | 0.825061 |
| 11 | Micronesia (Federated States of) | 2017 | 0.959648 | 0.823572 |
| 12 | Micronesia (Federated States of) | 2018 | 0.955921 | 0.821916 |
| 13 | Micronesia (Federated States of) | 2019 | 0.951491 | 0.819525 |
| 14 | Monaco                           | 1990 | 0.925141 | 0.509605 |
| 15 | Monaco                           | 1991 | 0.927871 | 0.511247 |
| 16 | Monaco                           | 1992 | 0.935894 | 0.515033 |
| 17 | Monaco                           | 1993 | 0.947152 | 0.520603 |
| 18 | Monaco                           | 1994 | 0.958841 | 0.52651  |
| 19 | Monaco                           | 1995 | 0.968499 | 0.532215 |
| 20 | Monaco                           | 1996 | 0.976394 | 0.538766 |
| 21 | Monaco                           | 1997 | 0.991226 | 0.548622 |
| 22 | Monaco                           | 1998 | 1.010798 | 0.560403 |
| 23 | Monaco                           | 1999 | 1.034407 | 0.573567 |
| 24 | Monaco                           | 2000 | 1.055584 | 0.586374 |
| 25 | Monaco                           | 2001 | 1.068534 | 0.59852  |
| 26 | Monaco                           | 2002 | 1.075324 | 0.609122 |
| 27 | Monaco                           | 2003 | 1.081212 | 0.620175 |
| 28 | Monaco                           | 2004 | 1.086635 | 0.630366 |
| 29 | Monaco                           | 2005 | 1.088433 | 0.639145 |
| 30 |                                  |      |          |          |
| 31 |                                  |      |          |          |
| 32 |                                  |      |          |          |
| 33 |                                  |      |          |          |
| 34 |                                  |      |          |          |
| 35 |                                  |      |          |          |
| 36 |                                  |      |          |          |
| 37 |                                  |      |          |          |
| 38 |                                  |      |          |          |
| 39 |                                  |      |          |          |
| 40 |                                  |      |          |          |
| 41 |                                  |      |          |          |
| 42 |                                  |      |          |          |
| 43 |                                  |      |          |          |
| 44 |                                  |      |          |          |
| 45 |                                  |      |          |          |
| 46 |                                  |      |          |          |

1  
2  
3  
4  
5  
6  
7  
8  
9  
10  
11  
12  
13  
14  
15  
16  
17  
18  
19  
20  
21  
22  
23  
24  
25  
26  
27  
28  
29  
30  
31  
32  
33  
34  
35  
36  
37  
38  
39  
40  
41  
42  
43  
44  
45  
46

|          |      |          |          |
|----------|------|----------|----------|
| Monaco   | 2006 | 1.082645 | 0.645151 |
| Monaco   | 2007 | 1.070951 | 0.648902 |
| Monaco   | 2008 | 1.059886 | 0.653042 |
| Monaco   | 2009 | 1.054282 | 0.658945 |
| Monaco   | 2010 | 1.052876 | 0.666098 |
| Monaco   | 2011 | 1.050548 | 0.672052 |
| Monaco   | 2012 | 1.046823 | 0.678352 |
| Monaco   | 2013 | 1.03124  | 0.674487 |
| Monaco   | 2014 | 1.025477 | 0.675192 |
| Monaco   | 2015 | 1.022501 | 0.676323 |
| Monaco   | 2016 | 1.017735 | 0.675253 |
| Monaco   | 2017 | 1.011475 | 0.673635 |
| Monaco   | 2018 | 1.004845 | 0.672659 |
| Monaco   | 2019 | 0.997704 | 0.670993 |
| Mongolia | 1990 | 1.068489 | 0.837677 |
| Mongolia | 1991 | 1.083221 | 0.846939 |
| Mongolia | 1992 | 1.081256 | 0.854461 |
| Mongolia | 1993 | 1.092407 | 0.854763 |
| Mongolia | 1994 | 1.087824 | 0.850761 |
| Mongolia | 1995 | 1.079002 | 0.852306 |
| Mongolia | 1996 | 1.060124 | 0.840739 |
| Mongolia | 1997 | 1.082339 | 0.856448 |
| Mongolia | 1998 | 1.074045 | 0.833624 |
| Mongolia | 1999 | 1.084455 | 0.837111 |
| Mongolia | 2000 | 1.047604 | 0.821764 |

|            |      |          |          |
|------------|------|----------|----------|
| Mongolia   | 2001 | 0.976921 | 0.761449 |
| Mongolia   | 2002 | 0.921562 | 0.715086 |
| Mongolia   | 2003 | 0.882353 | 0.687733 |
| Mongolia   | 2004 | 0.854392 | 0.675443 |
| Mongolia   | 2005 | 0.832971 | 0.664011 |
| Mongolia   | 2006 | 0.833794 | 0.662218 |
| Mongolia   | 2007 | 0.823721 | 0.663589 |
| Mongolia   | 2008 | 0.819758 | 0.675399 |
| Mongolia   | 2009 | 0.832738 | 0.69269  |
| Mongolia   | 2010 | 0.825495 | 0.676345 |
| Mongolia   | 2011 | 0.81695  | 0.665265 |
| Mongolia   | 2012 | 0.819276 | 0.684519 |
| Mongolia   | 2013 | 0.808343 | 0.682186 |
| Mongolia   | 2014 | 0.795602 | 0.677174 |
| Mongolia   | 2015 | 0.795543 | 0.676357 |
| Mongolia   | 2016 | 0.790086 | 0.663606 |
| Mongolia   | 2017 | 0.794348 | 0.661505 |
| Mongolia   | 2018 | 0.793758 | 0.653293 |
| Mongolia   | 2019 | 0.788673 | 0.633037 |
| Montenegro | 1990 | 0.730016 | 0.531763 |
| Montenegro | 1991 | 0.733277 | 0.528923 |
| Montenegro | 1992 | 0.752784 | 0.539443 |
| Montenegro | 1993 | 0.760196 | 0.546079 |
| Montenegro | 1994 | 0.793137 | 0.571782 |
| Montenegro | 1995 | 0.803658 | 0.58153  |

|    |            |      |          |          |
|----|------------|------|----------|----------|
| 1  |            |      |          |          |
| 2  |            |      |          |          |
| 3  |            |      |          |          |
| 4  |            |      |          |          |
| 5  | Montenegro | 1996 | 0.816688 | 0.593459 |
| 6  | Montenegro | 1997 | 0.803945 | 0.587557 |
| 7  | Montenegro | 1998 | 0.800749 | 0.587413 |
| 8  | Montenegro | 1999 | 0.806197 | 0.590958 |
| 9  | Montenegro | 2000 | 0.831277 | 0.61343  |
| 10 | Montenegro | 2001 | 0.83478  | 0.624572 |
| 11 | Montenegro | 2002 | 0.812396 | 0.611387 |
| 12 | Montenegro | 2003 | 0.800159 | 0.604112 |
| 13 | Montenegro | 2004 | 0.776479 | 0.583612 |
| 14 | Montenegro | 2005 | 0.749911 | 0.558299 |
| 15 | Montenegro | 2006 | 0.761925 | 0.567128 |
| 16 | Montenegro | 2007 | 0.800333 | 0.592415 |
| 17 | Montenegro | 2008 | 0.829676 | 0.616523 |
| 18 | Montenegro | 2009 | 0.849739 | 0.637266 |
| 19 | Montenegro | 2010 | 0.862346 | 0.649889 |
| 20 | Montenegro | 2011 | 0.845212 | 0.642788 |
| 21 | Montenegro | 2012 | 0.851893 | 0.648937 |
| 22 | Montenegro | 2013 | 0.843268 | 0.645223 |
| 23 | Montenegro | 2014 | 0.848705 | 0.651204 |
| 24 | Montenegro | 2015 | 0.842623 | 0.641021 |
| 25 | Montenegro | 2016 | 0.809543 | 0.606147 |
| 26 | Montenegro | 2017 | 0.802626 | 0.594613 |
| 27 | Montenegro | 2018 | 0.825529 | 0.60972  |
| 28 | Montenegro | 2019 | 0.810302 | 0.592792 |
| 29 | Morocco    | 1990 | 0.99491  | 0.878909 |
| 30 |            |      |          |          |
| 31 |            |      |          |          |
| 32 |            |      |          |          |
| 33 |            |      |          |          |
| 34 |            |      |          |          |
| 35 |            |      |          |          |
| 36 |            |      |          |          |
| 37 |            |      |          |          |
| 38 |            |      |          |          |
| 39 |            |      |          |          |
| 40 |            |      |          |          |
| 41 |            |      |          |          |
| 42 |            |      |          |          |
| 43 |            |      |          |          |
| 44 |            |      |          |          |
| 45 |            |      |          |          |
| 46 |            |      |          |          |

|         |      |          |          |
|---------|------|----------|----------|
| Morocco | 1991 | 0.991678 | 0.881717 |
| Morocco | 1992 | 0.946036 | 0.847594 |
| Morocco | 1993 | 0.935928 | 0.840068 |
| Morocco | 1994 | 0.94912  | 0.849024 |
| Morocco | 1995 | 0.952789 | 0.849879 |
| Morocco | 1996 | 0.973631 | 0.873777 |
| Morocco | 1997 | 0.987708 | 0.885371 |
| Morocco | 1998 | 0.96864  | 0.862799 |
| Morocco | 1999 | 0.966075 | 0.851575 |
| Morocco | 2000 | 1.027192 | 0.934749 |
| Morocco | 2001 | 1.1055   | 1.039632 |
| Morocco | 2002 | 1.172219 | 1.105859 |
| Morocco | 2003 | 1.178042 | 1.112077 |
| Morocco | 2004 | 1.210291 | 1.158825 |
| Morocco | 2005 | 1.232854 | 1.193653 |
| Morocco | 2006 | 1.241772 | 1.213695 |
| Morocco | 2007 | 1.25736  | 1.236321 |
| Morocco | 2008 | 1.258971 | 1.247946 |
| Morocco | 2009 | 1.258156 | 1.25791  |
| Morocco | 2010 | 1.260311 | 1.270169 |
| Morocco | 2011 | 1.257748 | 1.277081 |
| Morocco | 2012 | 1.235274 | 1.256931 |
| Morocco | 2013 | 1.049889 | 1.040043 |
| Morocco | 2014 | 1.068511 | 1.042004 |
| Morocco | 2015 | 1.085833 | 1.043414 |

|    |            |      |          |          |
|----|------------|------|----------|----------|
| 1  |            |      |          |          |
| 2  |            |      |          |          |
| 3  |            |      |          |          |
| 4  |            |      |          |          |
| 5  | Morocco    | 2016 | 1.097535 | 1.040243 |
| 6  | Morocco    | 2017 | 1.107104 | 1.035671 |
| 7  | Morocco    | 2018 | 1.112476 | 1.03045  |
| 8  | Morocco    | 2019 | 1.116306 | 1.025441 |
| 9  | Morocco    | 2019 | 1.116306 | 1.025441 |
| 10 | Mozambique | 1990 | 0.7455   | 0.632955 |
| 11 | Mozambique | 1991 | 0.740092 | 0.623329 |
| 12 | Mozambique | 1992 | 0.735712 | 0.617705 |
| 13 | Mozambique | 1992 | 0.735712 | 0.617705 |
| 14 | Mozambique | 1993 | 0.723898 | 0.608977 |
| 15 | Mozambique | 1994 | 0.719732 | 0.605701 |
| 16 | Mozambique | 1994 | 0.719732 | 0.605701 |
| 17 | Mozambique | 1995 | 0.713228 | 0.598496 |
| 18 | Mozambique | 1996 | 0.714012 | 0.596174 |
| 19 | Mozambique | 1997 | 0.715332 | 0.594212 |
| 20 | Mozambique | 1997 | 0.715332 | 0.594212 |
| 21 | Mozambique | 1998 | 0.710254 | 0.587737 |
| 22 | Mozambique | 1999 | 0.702769 | 0.579659 |
| 23 | Mozambique | 1999 | 0.702769 | 0.579659 |
| 24 | Mozambique | 2000 | 0.692727 | 0.56899  |
| 25 | Mozambique | 2001 | 0.678268 | 0.555227 |
| 26 | Mozambique | 2002 | 0.669768 | 0.545593 |
| 27 | Mozambique | 2002 | 0.669768 | 0.545593 |
| 28 | Mozambique | 2003 | 0.664322 | 0.539428 |
| 29 | Mozambique | 2004 | 0.664309 | 0.538267 |
| 30 | Mozambique | 2005 | 0.67067  | 0.543276 |
| 31 | Mozambique | 2005 | 0.67067  | 0.543276 |
| 32 | Mozambique | 2006 | 0.666668 | 0.537137 |
| 33 | Mozambique | 2007 | 0.666481 | 0.536097 |
| 34 | Mozambique | 2008 | 0.66311  | 0.534174 |
| 35 | Mozambique | 2008 | 0.66311  | 0.534174 |
| 36 | Mozambique | 2009 | 0.663878 | 0.535535 |
| 37 | Mozambique | 2010 | 0.664697 | 0.536946 |
| 38 | Mozambique | 2010 | 0.664697 | 0.536946 |
| 39 |            |      |          |          |
| 40 |            |      |          |          |
| 41 |            |      |          |          |
| 42 |            |      |          |          |
| 43 |            |      |          |          |
| 44 |            |      |          |          |
| 45 |            |      |          |          |
| 46 |            |      |          |          |

|            |      |          |          |
|------------|------|----------|----------|
| Mozambique | 2011 | 0.665384 | 0.538654 |
| Mozambique | 2012 | 0.666639 | 0.540631 |
| Mozambique | 2013 | 0.667253 | 0.542927 |
| Mozambique | 2014 | 0.670594 | 0.547312 |
| Mozambique | 2015 | 0.676028 | 0.553124 |
| Mozambique | 2016 | 0.678167 | 0.557826 |
| Mozambique | 2017 | 0.68422  | 0.56494  |
| Mozambique | 2018 | 0.686623 | 0.567848 |
| Mozambique | 2019 | 0.689936 | 0.571072 |
| Myanmar    | 1990 | 1.18372  | 0.956469 |
| Myanmar    | 1991 | 1.186191 | 0.955607 |
| Myanmar    | 1992 | 1.19093  | 0.957006 |
| Myanmar    | 1993 | 1.194359 | 0.957396 |
| Myanmar    | 1994 | 1.1991   | 0.959002 |
| Myanmar    | 1995 | 1.201551 | 0.957968 |
| Myanmar    | 1996 | 1.201112 | 0.955698 |
| Myanmar    | 1997 | 1.200431 | 0.953416 |
| Myanmar    | 1998 | 1.201065 | 0.952161 |
| Myanmar    | 1999 | 1.200264 | 0.950136 |
| Myanmar    | 2000 | 1.205709 | 0.953426 |
| Myanmar    | 2001 | 1.200051 | 0.949125 |
| Myanmar    | 2002 | 1.197862 | 0.947276 |
| Myanmar    | 2003 | 1.20639  | 0.952919 |
| Myanmar    | 2004 | 1.192564 | 0.942485 |
| Myanmar    | 2005 | 1.178545 | 0.930368 |



1  
2  
3  
4  
5  
6  
7  
8  
9  
10  
11  
12  
13  
14  
15  
16  
17  
18  
19  
20  
21  
22  
23  
24  
25  
26  
27  
28  
29  
30  
31  
32  
33  
34  
35  
36  
37  
38  
39  
40  
41  
42  
43  
44  
45  
46

|         |      |          |          |
|---------|------|----------|----------|
| Myanmar | 2006 | 1.17357  | 0.924872 |
| Myanmar | 2007 | 1.161685 | 0.914034 |
| Myanmar | 2008 | 1.150781 | 0.9032   |
| Myanmar | 2009 | 1.127682 | 0.883668 |
| Myanmar | 2010 | 1.099544 | 0.859687 |
| Myanmar | 2011 | 1.071159 | 0.835402 |
| Myanmar | 2012 | 1.05088  | 0.816291 |
| Myanmar | 2013 | 1.050014 | 0.812047 |
| Myanmar | 2014 | 1.048675 | 0.807729 |
| Myanmar | 2015 | 1.048365 | 0.80387  |
| Myanmar | 2016 | 1.049722 | 0.801738 |
| Myanmar | 2017 | 1.060853 | 0.807818 |
| Myanmar | 2018 | 1.06684  | 0.8106   |
| Myanmar | 2019 | 1.070598 | 0.810062 |
| Namibia | 1990 | 0.520952 | 0.414139 |
| Namibia | 1991 | 0.518697 | 0.41023  |
| Namibia | 1992 | 0.514996 | 0.405404 |
| Namibia | 1993 | 0.516465 | 0.404232 |
| Namibia | 1994 | 0.514588 | 0.401503 |
| Namibia | 1995 | 0.514977 | 0.400811 |
| Namibia | 1996 | 0.512347 | 0.398035 |
| Namibia | 1997 | 0.520707 | 0.40232  |
| Namibia | 1998 | 0.528704 | 0.406669 |
| Namibia | 1999 | 0.536913 | 0.411569 |
| Namibia | 2000 | 0.542403 | 0.414466 |

|         |      |          |          |
|---------|------|----------|----------|
| Namibia | 2001 | 0.536134 | 0.40849  |
| Namibia | 2002 | 0.535634 | 0.406544 |
| Namibia | 2003 | 0.527334 | 0.398785 |
| Namibia | 2004 | 0.515515 | 0.38807  |
| Namibia | 2005 | 0.50934  | 0.380508 |
| Namibia | 2006 | 0.512883 | 0.379323 |
| Namibia | 2007 | 0.520243 | 0.380621 |
| Namibia | 2008 | 0.525957 | 0.380947 |
| Namibia | 2009 | 0.537255 | 0.385315 |
| Namibia | 2010 | 0.542963 | 0.386363 |
| Namibia | 2011 | 0.547274 | 0.385731 |
| Namibia | 2012 | 0.562226 | 0.393271 |
| Namibia | 2013 | 0.570154 | 0.396655 |
| Namibia | 2014 | 0.579949 | 0.402086 |
| Namibia | 2015 | 0.589423 | 0.407695 |
| Namibia | 2016 | 0.596258 | 0.411905 |
| Namibia | 2017 | 0.601077 | 0.414841 |
| Namibia | 2018 | 0.606703 | 0.418179 |
| Namibia | 2019 | 0.61335  | 0.422065 |
| Nauru   | 1990 | 0.841129 | 0.90935  |
| Nauru   | 1991 | 0.836849 | 0.90501  |
| Nauru   | 1992 | 0.838949 | 0.908351 |
| Nauru   | 1993 | 0.81655  | 0.888291 |
| Nauru   | 1994 | 0.827685 | 0.897083 |
| Nauru   | 1995 | 0.825315 | 0.892624 |

|       |      |          |          |
|-------|------|----------|----------|
| Nauru | 1996 | 0.835952 | 0.896632 |
| Nauru | 1997 | 0.847038 | 0.900004 |
| Nauru | 1998 | 0.859692 | 0.901619 |
| Nauru | 1999 | 0.855559 | 0.887218 |
| Nauru | 2000 | 0.855925 | 0.875318 |
| Nauru | 2001 | 0.857772 | 0.863824 |
| Nauru | 2002 | 0.845386 | 0.844801 |
| Nauru | 2003 | 0.839563 | 0.830172 |
| Nauru | 2004 | 0.843791 | 0.82551  |
| Nauru | 2005 | 0.830454 | 0.805166 |
| Nauru | 2006 | 0.821763 | 0.78876  |
| Nauru | 2007 | 0.806174 | 0.767626 |
| Nauru | 2008 | 0.793628 | 0.750901 |
| Nauru | 2009 | 0.787585 | 0.740255 |
| Nauru | 2010 | 0.783428 | 0.733114 |
| Nauru | 2011 | 0.782513 | 0.727983 |
| Nauru | 2012 | 0.78002  | 0.722149 |
| Nauru | 2013 | 0.779317 | 0.718327 |
| Nauru | 2014 | 0.776438 | 0.713153 |
| Nauru | 2015 | 0.78012  | 0.712964 |
| Nauru | 2016 | 0.786155 | 0.71382  |
| Nauru | 2017 | 0.797984 | 0.719267 |
| Nauru | 2018 | 0.809922 | 0.723824 |
| Nauru | 2019 | 0.822037 | 0.727821 |
| Nepal | 1990 | 1.006487 | 0.88658  |

|       |      |          |          |
|-------|------|----------|----------|
| Nepal | 1991 | 1.008787 | 0.889125 |
| Nepal | 1992 | 1.017032 | 0.897647 |
| Nepal | 1993 | 1.009764 | 0.893959 |
| Nepal | 1994 | 0.999923 | 0.887975 |
| Nepal | 1995 | 0.980684 | 0.874587 |
| Nepal | 1996 | 0.960356 | 0.859834 |
| Nepal | 1997 | 0.932334 | 0.838205 |
| Nepal | 1998 | 0.9169   | 0.826599 |
| Nepal | 1999 | 0.913889 | 0.824936 |
| Nepal | 2000 | 0.891626 | 0.807733 |
| Nepal | 2001 | 0.885184 | 0.803387 |
| Nepal | 2002 | 0.88509  | 0.80353  |
| Nepal | 2003 | 0.886223 | 0.804379 |
| Nepal | 2004 | 0.88261  | 0.801964 |
| Nepal | 2005 | 0.88549  | 0.803022 |
| Nepal | 2006 | 0.885284 | 0.802625 |
| Nepal | 2007 | 0.895269 | 0.810404 |
| Nepal | 2008 | 0.906467 | 0.818901 |
| Nepal | 2009 | 0.920021 | 0.829422 |
| Nepal | 2010 | 0.946883 | 0.850073 |
| Nepal | 2011 | 0.956762 | 0.857514 |
| Nepal | 2012 | 0.976914 | 0.871798 |
| Nepal | 2013 | 0.994293 | 0.883126 |
| Nepal | 2014 | 1.016476 | 0.898038 |
| Nepal | 2015 | 1.035396 | 0.907818 |

|    |             |      |          |          |
|----|-------------|------|----------|----------|
| 1  |             |      |          |          |
| 2  |             |      |          |          |
| 3  |             |      |          |          |
| 4  |             |      |          |          |
| 5  | Nepal       | 2016 | 1.049671 | 0.914186 |
| 6  | Nepal       | 2017 | 1.063584 | 0.920054 |
| 7  | Nepal       | 2018 | 1.076166 | 0.92446  |
| 8  | Nepal       | 2019 | 1.087308 | 0.926945 |
| 9  | Nepal       | 2019 | 1.087308 | 0.926945 |
| 10 | Netherlands | 1990 | 1.447557 | 0.744821 |
| 11 | Netherlands | 1991 | 1.476313 | 0.748788 |
| 12 | Netherlands | 1992 | 1.479029 | 0.741339 |
| 13 | Netherlands | 1993 | 1.466228 | 0.727559 |
| 14 | Netherlands | 1994 | 1.509769 | 0.744292 |
| 15 | Netherlands | 1995 | 1.525182 | 0.750735 |
| 16 | Netherlands | 1996 | 1.511319 | 0.746839 |
| 17 | Netherlands | 1997 | 1.502871 | 0.745412 |
| 18 | Netherlands | 1998 | 1.468095 | 0.728972 |
| 19 | Netherlands | 1999 | 1.439072 | 0.71541  |
| 20 | Netherlands | 2000 | 1.39814  | 0.697868 |
| 21 | Netherlands | 2001 | 1.413555 | 0.709338 |
| 22 | Netherlands | 2002 | 1.425754 | 0.719386 |
| 23 | Netherlands | 2003 | 1.388924 | 0.704545 |
| 24 | Netherlands | 2004 | 1.400944 | 0.709384 |
| 25 | Netherlands | 2005 | 1.401287 | 0.709922 |
| 26 | Netherlands | 2006 | 1.401839 | 0.710847 |
| 27 | Netherlands | 2007 | 1.402669 | 0.714385 |
| 28 | Netherlands | 2008 | 1.406942 | 0.72216  |
| 29 | Netherlands | 2009 | 1.40736  | 0.727049 |
| 30 | Netherlands | 2010 | 1.421272 | 0.736793 |
| 31 |             |      |          |          |
| 32 |             |      |          |          |
| 33 |             |      |          |          |
| 34 |             |      |          |          |
| 35 |             |      |          |          |
| 36 |             |      |          |          |
| 37 |             |      |          |          |
| 38 |             |      |          |          |
| 39 |             |      |          |          |
| 40 |             |      |          |          |
| 41 |             |      |          |          |
| 42 |             |      |          |          |
| 43 |             |      |          |          |
| 44 |             |      |          |          |
| 45 |             |      |          |          |
| 46 |             |      |          |          |

|    |             |      |          |          |
|----|-------------|------|----------|----------|
| 1  |             |      |          |          |
| 2  |             |      |          |          |
| 3  |             |      |          |          |
| 4  |             |      |          |          |
| 5  | Netherlands | 2011 | 1.446806 | 0.757099 |
| 6  | Netherlands | 2012 | 1.442136 | 0.762483 |
| 7  | Netherlands | 2013 | 1.430792 | 0.767487 |
| 8  | Netherlands | 2014 | 1.440957 | 0.786282 |
| 9  | Netherlands | 2015 | 1.412873 | 0.785196 |
| 10 | Netherlands | 2016 | 1.402363 | 0.791495 |
| 11 | Netherlands | 2017 | 1.364227 | 0.786008 |
| 12 | Netherlands | 2018 | 1.345275 | 0.792336 |
| 13 | Netherlands | 2019 | 1.31752  | 0.791067 |
| 14 | Netherlands | 2019 | 1.31752  | 0.791067 |
| 15 | Netherlands | 2019 | 1.31752  | 0.791067 |
| 16 | Netherlands | 2019 | 1.31752  | 0.791067 |
| 17 | New Zealand | 1990 | 1.066192 | 0.705987 |
| 18 | New Zealand | 1991 | 1.063794 | 0.698293 |
| 19 | New Zealand | 1992 | 0.993804 | 0.647648 |
| 20 | New Zealand | 1993 | 0.990158 | 0.641685 |
| 21 | New Zealand | 1994 | 0.975831 | 0.628564 |
| 22 | New Zealand | 1995 | 0.987665 | 0.632708 |
| 23 | New Zealand | 1996 | 1.006324 | 0.639629 |
| 24 | New Zealand | 1997 | 0.977481 | 0.622835 |
| 25 | New Zealand | 1998 | 0.981552 | 0.627138 |
| 26 | New Zealand | 1999 | 0.975372 | 0.624972 |
| 27 | New Zealand | 2000 | 0.962181 | 0.62377  |
| 28 | New Zealand | 2001 | 0.943874 | 0.613128 |
| 29 | New Zealand | 2002 | 0.97546  | 0.637451 |
| 30 | New Zealand | 2003 | 0.971302 | 0.637979 |
| 31 | New Zealand | 2004 | 0.993113 | 0.655944 |
| 32 | New Zealand | 2005 | 0.992803 | 0.66123  |
| 33 | New Zealand | 2005 | 0.992803 | 0.66123  |
| 34 | New Zealand | 2005 | 0.992803 | 0.66123  |
| 35 | New Zealand | 2005 | 0.992803 | 0.66123  |
| 36 | New Zealand | 2005 | 0.992803 | 0.66123  |
| 37 | New Zealand | 2005 | 0.992803 | 0.66123  |
| 38 | New Zealand | 2005 | 0.992803 | 0.66123  |
| 39 |             |      |          |          |
| 40 |             |      |          |          |
| 41 |             |      |          |          |
| 42 |             |      |          |          |
| 43 |             |      |          |          |
| 44 |             |      |          |          |
| 45 |             |      |          |          |
| 46 |             |      |          |          |

1  
2  
3  
4  
5  
6  
7  
8  
9  
10  
11  
12  
13  
14  
15  
16  
17  
18  
19  
20  
21  
22  
23  
24  
25  
26  
27  
28  
29  
30  
31  
32  
33  
34  
35  
36  
37  
38  
39  
40  
41  
42  
43  
44  
45  
46

|             |      |          |          |
|-------------|------|----------|----------|
| New Zealand | 2006 | 0.984374 | 0.661881 |
| New Zealand | 2007 | 0.956275 | 0.65261  |
| New Zealand | 2008 | 0.960295 | 0.664472 |
| New Zealand | 2009 | 0.944662 | 0.656956 |
| New Zealand | 2010 | 0.959474 | 0.671581 |
| New Zealand | 2011 | 0.954743 | 0.674297 |
| New Zealand | 2012 | 0.930048 | 0.664193 |
| New Zealand | 2013 | 0.924215 | 0.667159 |
| New Zealand | 2014 | 0.91942  | 0.665934 |
| New Zealand | 2015 | 0.941312 | 0.687821 |
| New Zealand | 2016 | 0.929588 | 0.68481  |
| New Zealand | 2017 | 0.927328 | 0.689256 |
| New Zealand | 2018 | 0.893293 | 0.670898 |
| New Zealand | 2019 | 0.881984 | 0.667259 |
| Nicaragua   | 1990 | 0.522688 | 0.397753 |
| Nicaragua   | 1991 | 0.514671 | 0.395575 |
| Nicaragua   | 1992 | 0.515144 | 0.395474 |
| Nicaragua   | 1993 | 0.52376  | 0.401308 |
| Nicaragua   | 1994 | 0.495389 | 0.382344 |
| Nicaragua   | 1995 | 0.657199 | 0.544353 |
| Nicaragua   | 1996 | 0.644636 | 0.542242 |
| Nicaragua   | 1997 | 0.630431 | 0.535664 |
| Nicaragua   | 1998 | 0.618795 | 0.531651 |
| Nicaragua   | 1999 | 0.572153 | 0.497733 |
| Nicaragua   | 2000 | 0.578434 | 0.508295 |

|           |      |          |          |
|-----------|------|----------|----------|
| Nicaragua | 2001 | 0.593106 | 0.527615 |
| Nicaragua | 2002 | 0.583986 | 0.525227 |
| Nicaragua | 2003 | 0.551447 | 0.49958  |
| Nicaragua | 2004 | 0.557455 | 0.50602  |
| Nicaragua | 2005 | 0.538036 | 0.48986  |
| Nicaragua | 2006 | 0.52597  | 0.477105 |
| Nicaragua | 2007 | 0.544361 | 0.49303  |
| Nicaragua | 2008 | 0.539564 | 0.48876  |
| Nicaragua | 2009 | 0.545132 | 0.49153  |
| Nicaragua | 2010 | 0.550934 | 0.493435 |
| Nicaragua | 2011 | 0.535405 | 0.477532 |
| Nicaragua | 2012 | 0.522062 | 0.46299  |
| Nicaragua | 2013 | 0.524102 | 0.460842 |
| Nicaragua | 2014 | 0.537312 | 0.467204 |
| Nicaragua | 2015 | 0.557047 | 0.479269 |
| Nicaragua | 2016 | 0.541955 | 0.463483 |
| Nicaragua | 2017 | 0.558139 | 0.471183 |
| Nicaragua | 2018 | 0.560598 | 0.468403 |
| Nicaragua | 2019 | 0.562831 | 0.466458 |
| Niger     | 1990 | 0.810415 | 0.758079 |
| Niger     | 1991 | 0.826226 | 0.773965 |
| Niger     | 1992 | 0.838852 | 0.788117 |
| Niger     | 1993 | 0.845358 | 0.798159 |
| Niger     | 1994 | 0.855762 | 0.808671 |
| Niger     | 1995 | 0.860737 | 0.809156 |



1  
2  
3  
4  
5  
6  
7  
8  
9  
10  
11  
12  
13  
14  
15  
16  
17  
18  
19  
20  
21  
22  
23  
24  
25  
26  
27  
28  
29  
30  
31  
32  
33  
34  
35  
36  
37  
38  
39  
40  
41  
42  
43  
44  
45  
46

|         |      |          |          |
|---------|------|----------|----------|
| Niger   | 1996 | 0.856771 | 0.807281 |
| Niger   | 1997 | 0.855472 | 0.806414 |
| Niger   | 1998 | 0.843432 | 0.798485 |
| Niger   | 1999 | 0.828745 | 0.782915 |
| Niger   | 2000 | 0.819592 | 0.771369 |
| Niger   | 2001 | 0.806746 | 0.759651 |
| Niger   | 2002 | 0.797001 | 0.752312 |
| Niger   | 2003 | 0.787058 | 0.746425 |
| Niger   | 2004 | 0.775544 | 0.739366 |
| Niger   | 2005 | 0.766949 | 0.727909 |
| Niger   | 2006 | 0.756655 | 0.71908  |
| Niger   | 2007 | 0.750941 | 0.711134 |
| Niger   | 2008 | 0.743702 | 0.704064 |
| Niger   | 2009 | 0.735897 | 0.69378  |
| Niger   | 2010 | 0.727739 | 0.684338 |
| Niger   | 2011 | 0.726785 | 0.678833 |
| Niger   | 2012 | 0.724445 | 0.674636 |
| Niger   | 2013 | 0.718303 | 0.669687 |
| Niger   | 2014 | 0.722409 | 0.67305  |
| Niger   | 2015 | 0.724784 | 0.671592 |
| Niger   | 2016 | 0.724831 | 0.672213 |
| Niger   | 2017 | 0.726952 | 0.673326 |
| Niger   | 2018 | 0.721766 | 0.673434 |
| Niger   | 2019 | 0.724118 | 0.675679 |
| Nigeria | 1990 | 0.942702 | 0.872561 |

|         |      |          |          |
|---------|------|----------|----------|
| Nigeria | 1991 | 0.934436 | 0.872282 |
| Nigeria | 1992 | 0.924894 | 0.872943 |
| Nigeria | 1993 | 0.914077 | 0.870767 |
| Nigeria | 1994 | 0.906826 | 0.871447 |
| Nigeria | 1995 | 0.895881 | 0.866064 |
| Nigeria | 1996 | 0.885105 | 0.861683 |
| Nigeria | 1997 | 0.881762 | 0.864812 |
| Nigeria | 1998 | 0.87083  | 0.860374 |
| Nigeria | 1999 | 0.852298 | 0.847813 |
| Nigeria | 2000 | 0.834291 | 0.834275 |
| Nigeria | 2001 | 0.819429 | 0.824864 |
| Nigeria | 2002 | 0.807634 | 0.81888  |
| Nigeria | 2003 | 0.793461 | 0.811085 |
| Nigeria | 2004 | 0.783844 | 0.806558 |
| Nigeria | 2005 | 0.771572 | 0.797225 |
| Nigeria | 2006 | 0.765569 | 0.792637 |
| Nigeria | 2007 | 0.759324 | 0.78688  |
| Nigeria | 2008 | 0.75287  | 0.779753 |
| Nigeria | 2009 | 0.745507 | 0.769981 |
| Nigeria | 2010 | 0.736712 | 0.759652 |
| Nigeria | 2011 | 0.734046 | 0.753786 |
| Nigeria | 2012 | 0.737838 | 0.751281 |
| Nigeria | 2013 | 0.734996 | 0.740608 |
| Nigeria | 2014 | 0.742661 | 0.740121 |
| Nigeria | 2015 | 0.754025 | 0.743835 |

|    |         |      |          |          |
|----|---------|------|----------|----------|
| 1  |         |      |          |          |
| 2  |         |      |          |          |
| 3  |         |      |          |          |
| 4  |         |      |          |          |
| 5  | Nigeria | 2016 | 0.763335 | 0.745167 |
| 6  | Nigeria | 2017 | 0.778616 | 0.75156  |
| 7  | Nigeria | 2018 | 0.793522 | 0.757511 |
| 8  | Nigeria | 2019 | 0.810217 | 0.764132 |
| 9  | Niue    | 1990 | 1.190231 | 0.775411 |
| 10 | Niue    | 1991 | 1.194033 | 0.789915 |
| 11 | Niue    | 1992 | 1.207319 | 0.812242 |
| 12 | Niue    | 1993 | 1.20373  | 0.823011 |
| 13 | Niue    | 1994 | 1.178585 | 0.817084 |
| 14 | Niue    | 1995 | 1.157887 | 0.813367 |
| 15 | Niue    | 1996 | 1.143385 | 0.814647 |
| 16 | Niue    | 1997 | 1.133241 | 0.820008 |
| 17 | Niue    | 1998 | 1.099876 | 0.807742 |
| 18 | Niue    | 1999 | 1.073953 | 0.798718 |
| 19 | Niue    | 2000 | 1.048715 | 0.788429 |
| 20 | Niue    | 2001 | 1.012068 | 0.767538 |
| 21 | Niue    | 2002 | 1.005777 | 0.76615  |
| 22 | Niue    | 2003 | 0.992871 | 0.757578 |
| 23 | Niue    | 2004 | 1.011142 | 0.772571 |
| 24 | Niue    | 2005 | 0.978883 | 0.747352 |
| 25 | Niue    | 2006 | 0.972596 | 0.743419 |
| 26 | Niue    | 2007 | 0.95894  | 0.733977 |
| 27 | Niue    | 2008 | 0.95539  | 0.73326  |
| 28 | Niue    | 2009 | 0.939876 | 0.721684 |
| 29 | Niue    | 2010 | 0.926776 | 0.71016  |
| 30 |         |      |          |          |
| 31 |         |      |          |          |
| 32 |         |      |          |          |
| 33 |         |      |          |          |
| 34 |         |      |          |          |
| 35 |         |      |          |          |
| 36 |         |      |          |          |
| 37 |         |      |          |          |
| 38 |         |      |          |          |
| 39 |         |      |          |          |
| 40 |         |      |          |          |
| 41 |         |      |          |          |
| 42 |         |      |          |          |
| 43 |         |      |          |          |
| 44 |         |      |          |          |
| 45 |         |      |          |          |
| 46 |         |      |          |          |

|                 |      |          |          |
|-----------------|------|----------|----------|
| Niue            | 2011 | 0.91639  | 0.701185 |
| Niue            | 2012 | 0.907389 | 0.69404  |
| Niue            | 2013 | 0.901788 | 0.689627 |
| Niue            | 2014 | 0.895694 | 0.683761 |
| Niue            | 2015 | 0.894766 | 0.680007 |
| Niue            | 2016 | 0.892505 | 0.676161 |
| Niue            | 2017 | 0.893889 | 0.676244 |
| Niue            | 2018 | 0.890768 | 0.674944 |
| Niue            | 2019 | 0.887772 | 0.673264 |
| North Macedonia | 1990 | 0.680204 | 0.58975  |
| North Macedonia | 1991 | 0.68378  | 0.5956   |
| North Macedonia | 1992 | 0.664624 | 0.571964 |
| North Macedonia | 1993 | 0.644703 | 0.547151 |
| North Macedonia | 1994 | 0.663149 | 0.555907 |
| North Macedonia | 1995 | 0.671096 | 0.552266 |
| North Macedonia | 1996 | 0.695813 | 0.563928 |
| North Macedonia | 1997 | 0.741597 | 0.594207 |
| North Macedonia | 1998 | 0.771646 | 0.617339 |
| North Macedonia | 1999 | 0.777685 | 0.616422 |
| North Macedonia | 2000 | 0.797954 | 0.622484 |
| North Macedonia | 2001 | 0.778443 | 0.606375 |
| North Macedonia | 2002 | 0.749492 | 0.587121 |
| North Macedonia | 2003 | 0.769429 | 0.60026  |
| North Macedonia | 2004 | 0.792515 | 0.614197 |
| North Macedonia | 2005 | 0.783544 | 0.610202 |

|    |                          |      |          |          |
|----|--------------------------|------|----------|----------|
| 1  |                          |      |          |          |
| 2  |                          |      |          |          |
| 3  |                          |      |          |          |
| 4  |                          |      |          |          |
| 5  | North Macedonia          | 2006 | 0.767706 | 0.60037  |
| 6  | North Macedonia          | 2007 | 0.791232 | 0.612007 |
| 7  | North Macedonia          | 2008 | 0.790856 | 0.612737 |
| 8  | North Macedonia          | 2009 | 0.763725 | 0.598462 |
| 9  | North Macedonia          | 2010 | 0.778915 | 0.614822 |
| 10 | North Macedonia          | 2011 | 0.793147 | 0.637721 |
| 11 | North Macedonia          | 2012 | 0.811289 | 0.66772  |
| 12 | North Macedonia          | 2013 | 0.780544 | 0.642134 |
| 13 | North Macedonia          | 2014 | 0.776893 | 0.636497 |
| 14 | North Macedonia          | 2015 | 0.799244 | 0.654666 |
| 15 | North Macedonia          | 2016 | 0.786323 | 0.643621 |
| 16 | North Macedonia          | 2017 | 0.788026 | 0.643868 |
| 17 | North Macedonia          | 2018 | 0.795756 | 0.652467 |
| 18 | North Macedonia          | 2019 | 0.797522 | 0.654678 |
| 19 | Northern Mariana Islands | 1990 | 0.904061 | 1.155126 |
| 20 | Northern Mariana Islands | 1991 | 0.908144 | 1.156065 |
| 21 | Northern Mariana Islands | 1992 | 0.940581 | 1.169589 |
| 22 | Northern Mariana Islands | 1993 | 0.975433 | 1.173898 |
| 23 | Northern Mariana Islands | 1994 | 1.002007 | 1.17191  |
| 24 | Northern Mariana Islands | 1995 | 1.003151 | 1.154852 |
| 25 | Northern Mariana Islands | 1996 | 0.987202 | 1.126734 |
| 26 | Northern Mariana Islands | 1997 | 0.968009 | 1.097328 |
| 27 | Northern Mariana Islands | 1998 | 0.947527 | 1.065921 |
| 28 | Northern Mariana Islands | 1999 | 0.959593 | 1.066621 |
| 29 | Northern Mariana Islands | 2000 | 0.952837 | 1.060532 |
| 30 |                          |      |          |          |
| 31 |                          |      |          |          |
| 32 |                          |      |          |          |
| 33 |                          |      |          |          |
| 34 |                          |      |          |          |
| 35 |                          |      |          |          |
| 36 |                          |      |          |          |
| 37 |                          |      |          |          |
| 38 |                          |      |          |          |
| 39 |                          |      |          |          |
| 40 |                          |      |          |          |
| 41 |                          |      |          |          |
| 42 |                          |      |          |          |
| 43 |                          |      |          |          |
| 44 |                          |      |          |          |
| 45 |                          |      |          |          |
| 46 |                          |      |          |          |

|                          |      |          |          |
|--------------------------|------|----------|----------|
| Northern Mariana Islands | 2001 | 0.991994 | 1.099375 |
| Northern Mariana Islands | 2002 | 0.987834 | 1.094556 |
| Northern Mariana Islands | 2003 | 0.979144 | 1.077003 |
| Northern Mariana Islands | 2004 | 0.978766 | 1.061672 |
| Northern Mariana Islands | 2005 | 0.955494 | 1.027025 |
| Northern Mariana Islands | 2006 | 0.935982 | 1.000809 |
| Northern Mariana Islands | 2007 | 0.897664 | 0.960032 |
| Northern Mariana Islands | 2008 | 0.864887 | 0.927883 |
| Northern Mariana Islands | 2009 | 0.838403 | 0.903614 |
| Northern Mariana Islands | 2010 | 0.815518 | 0.876638 |
| Northern Mariana Islands | 2011 | 0.817938 | 0.865424 |
| Northern Mariana Islands | 2012 | 0.827228 | 0.851935 |
| Northern Mariana Islands | 2013 | 0.852758 | 0.850358 |
| Northern Mariana Islands | 2014 | 0.875267 | 0.849207 |
| Northern Mariana Islands | 2015 | 0.888178 | 0.851222 |
| Northern Mariana Islands | 2016 | 0.885488 | 0.844042 |
| Northern Mariana Islands | 2017 | 0.888524 | 0.842979 |
| Northern Mariana Islands | 2018 | 0.887991 | 0.841535 |
| Northern Mariana Islands | 2019 | 0.885281 | 0.840043 |
| Norway                   | 1990 | 0.75453  | 0.444114 |
| Norway                   | 1991 | 0.76261  | 0.443497 |
| Norway                   | 1992 | 0.753197 | 0.43253  |
| Norway                   | 1993 | 0.762236 | 0.431351 |
| Norway                   | 1994 | 0.781039 | 0.438624 |
| Norway                   | 1995 | 0.763202 | 0.424597 |

|        |      |          |          |
|--------|------|----------|----------|
| Norway | 1996 | 0.758874 | 0.419658 |
| Norway | 1997 | 0.75473  | 0.412952 |
| Norway | 1998 | 0.774382 | 0.420472 |
| Norway | 1999 | 0.804349 | 0.433843 |
| Norway | 2000 | 0.825601 | 0.441517 |
| Norway | 2001 | 0.853106 | 0.453431 |
| Norway | 2002 | 0.867374 | 0.459636 |
| Norway | 2003 | 0.880328 | 0.464835 |
| Norway | 2004 | 0.889531 | 0.470566 |
| Norway | 2005 | 0.89659  | 0.476656 |
| Norway | 2006 | 0.922606 | 0.490047 |
| Norway | 2007 | 0.907665 | 0.483353 |
| Norway | 2008 | 0.911053 | 0.485221 |
| Norway | 2009 | 0.928439 | 0.497259 |
| Norway | 2010 | 0.935386 | 0.504449 |
| Norway | 2011 | 0.92996  | 0.505624 |
| Norway | 2012 | 0.945872 | 0.517948 |
| Norway | 2013 | 0.94377  | 0.523526 |
| Norway | 2014 | 0.921463 | 0.517737 |
| Norway | 2015 | 0.916327 | 0.521282 |
| Norway | 2016 | 0.921739 | 0.532769 |
| Norway | 2017 | 0.936924 | 0.549344 |
| Norway | 2018 | 0.918215 | 0.550188 |
| Norway | 2019 | 0.878137 | 0.537045 |
| Oman   | 1990 | 0.979395 | 0.855588 |

|      |      |          |          |
|------|------|----------|----------|
| Oman | 1991 | 0.973416 | 0.875397 |
| Oman | 1992 | 0.949128 | 0.87044  |
| Oman | 1993 | 0.928445 | 0.864161 |
| Oman | 1994 | 0.918156 | 0.861888 |
| Oman | 1995 | 0.904759 | 0.858133 |
| Oman | 1996 | 0.87801  | 0.851048 |
| Oman | 1997 | 0.854061 | 0.839597 |
| Oman | 1998 | 0.840761 | 0.832031 |
| Oman | 1999 | 0.837351 | 0.831819 |
| Oman | 2000 | 0.834719 | 0.835971 |
| Oman | 2001 | 0.827618 | 0.842637 |
| Oman | 2002 | 0.836788 | 0.865047 |
| Oman | 2003 | 0.845547 | 0.873422 |
| Oman | 2004 | 0.855899 | 0.869597 |
| Oman | 2005 | 0.876488 | 0.894328 |
| Oman | 2006 | 0.881398 | 0.931667 |
| Oman | 2007 | 0.83088  | 0.881098 |
| Oman | 2008 | 0.794738 | 0.829971 |
| Oman | 2009 | 0.813201 | 0.848894 |
| Oman | 2010 | 0.846076 | 0.885023 |
| Oman | 2011 | 0.828041 | 0.880499 |
| Oman | 2012 | 0.795644 | 0.823064 |
| Oman | 2013 | 0.786745 | 0.844324 |
| Oman | 2014 | 0.832188 | 0.90246  |
| Oman | 2015 | 0.831518 | 0.871769 |



1  
2  
3  
4  
5  
6  
7  
8  
9  
10  
11  
12  
13  
14  
15  
16  
17  
18  
19  
20  
21  
22  
23  
24  
25  
26  
27  
28  
29  
30  
31  
32  
33  
34  
35  
36  
37  
38  
39  
40  
41  
42  
43  
44  
45  
46

|          |      |          |          |
|----------|------|----------|----------|
| Oman     | 2016 | 0.822027 | 0.839947 |
| Oman     | 2017 | 0.850428 | 0.847046 |
| Oman     | 2018 | 0.903009 | 0.894798 |
| Oman     | 2019 | 0.928841 | 0.907248 |
| Pakistan | 1990 | 0.769579 | 0.859356 |
| Pakistan | 1991 | 0.77647  | 0.861193 |
| Pakistan | 1992 | 0.790828 | 0.870807 |
| Pakistan | 1993 | 0.795747 | 0.870075 |
| Pakistan | 1994 | 0.805727 | 0.87484  |
| Pakistan | 1995 | 0.818759 | 0.883548 |
| Pakistan | 1996 | 0.825433 | 0.884969 |
| Pakistan | 1997 | 0.83398  | 0.887684 |
| Pakistan | 1998 | 0.842863 | 0.891115 |
| Pakistan | 1999 | 0.855256 | 0.899086 |
| Pakistan | 2000 | 0.86957  | 0.91118  |
| Pakistan | 2001 | 0.872852 | 0.911187 |
| Pakistan | 2002 | 0.871058 | 0.904883 |
| Pakistan | 2003 | 0.880193 | 0.910245 |
| Pakistan | 2004 | 0.877101 | 0.904079 |
| Pakistan | 2005 | 0.872892 | 0.897924 |
| Pakistan | 2006 | 0.872655 | 0.894325 |
| Pakistan | 2007 | 0.872149 | 0.891288 |
| Pakistan | 2008 | 0.875317 | 0.890402 |
| Pakistan | 2009 | 0.878341 | 0.890376 |
| Pakistan | 2010 | 0.878473 | 0.888904 |

|    |          |      |          |          |
|----|----------|------|----------|----------|
| 1  |          |      |          |          |
| 2  |          |      |          |          |
| 3  |          |      |          |          |
| 4  |          |      |          |          |
| 5  | Pakistan | 2011 | 0.877758 | 0.884423 |
| 6  | Pakistan | 2012 | 0.873696 | 0.878442 |
| 7  | Pakistan | 2013 | 0.883067 | 0.885333 |
| 8  | Pakistan | 2014 | 0.882844 | 0.883889 |
| 9  | Pakistan | 2015 | 0.881913 | 0.881605 |
| 10 | Pakistan | 2016 | 0.881354 | 0.879779 |
| 11 | Pakistan | 2017 | 0.883992 | 0.881982 |
| 12 | Pakistan | 2018 | 0.88619  | 0.884133 |
| 13 | Pakistan | 2019 | 0.889084 | 0.887167 |
| 14 | Palau    | 1990 | 0.590726 | 0.567074 |
| 15 | Palau    | 1991 | 0.592484 | 0.570484 |
| 16 | Palau    | 1992 | 0.597138 | 0.577494 |
| 17 | Palau    | 1993 | 0.598439 | 0.583652 |
| 18 | Palau    | 1994 | 0.607683 | 0.594125 |
| 19 | Palau    | 1995 | 0.602122 | 0.598155 |
| 20 | Palau    | 1996 | 0.594922 | 0.602471 |
| 21 | Palau    | 1997 | 0.583794 | 0.605164 |
| 22 | Palau    | 1998 | 0.569959 | 0.607432 |
| 23 | Palau    | 1999 | 0.552715 | 0.606219 |
| 24 | Palau    | 2000 | 0.535765 | 0.600872 |
| 25 | Palau    | 2001 | 0.527349 | 0.594391 |
| 26 | Palau    | 2002 | 0.528002 | 0.591384 |
| 27 | Palau    | 2003 | 0.527773 | 0.584654 |
| 28 | Palau    | 2004 | 0.551456 | 0.599923 |
| 29 | Palau    | 2005 | 0.561114 | 0.60323  |
| 30 |          |      |          |          |
| 31 |          |      |          |          |
| 32 |          |      |          |          |
| 33 |          |      |          |          |
| 34 |          |      |          |          |
| 35 |          |      |          |          |
| 36 |          |      |          |          |
| 37 |          |      |          |          |
| 38 |          |      |          |          |
| 39 |          |      |          |          |
| 40 |          |      |          |          |
| 41 |          |      |          |          |
| 42 |          |      |          |          |
| 43 |          |      |          |          |
| 44 |          |      |          |          |
| 45 |          |      |          |          |
| 46 |          |      |          |          |

|    |           |      |          |          |
|----|-----------|------|----------|----------|
| 1  |           |      |          |          |
| 2  |           |      |          |          |
| 3  |           |      |          |          |
| 4  |           |      |          |          |
| 5  | Palau     | 2006 | 0.560422 | 0.591128 |
| 6  | Palau     | 2007 | 0.553735 | 0.574366 |
| 7  | Palau     | 2008 | 0.548002 | 0.561176 |
| 8  | Palau     | 2009 | 0.544165 | 0.552275 |
| 9  | Palau     | 2010 | 0.540527 | 0.545934 |
| 10 | Palau     | 2011 | 0.537092 | 0.540225 |
| 11 | Palau     | 2012 | 0.533922 | 0.535625 |
| 12 | Palau     | 2013 | 0.533608 | 0.534197 |
| 13 | Palau     | 2014 | 0.531007 | 0.530978 |
| 14 | Palau     | 2015 | 0.529723 | 0.529574 |
| 15 | Palau     | 2016 | 0.529932 | 0.529197 |
| 16 | Palau     | 2017 | 0.533105 | 0.531537 |
| 17 | Palau     | 2018 | 0.535611 | 0.532533 |
| 18 | Palau     | 2019 | 0.538439 | 0.532765 |
| 19 | Palestine | 1990 | 1.096766 | 0.844508 |
| 20 | Palestine | 1991 | 1.091591 | 0.837304 |
| 21 | Palestine | 1992 | 1.084402 | 0.829288 |
| 22 | Palestine | 1993 | 1.079099 | 0.822787 |
| 23 | Palestine | 1994 | 1.078678 | 0.820767 |
| 24 | Palestine | 1995 | 1.07913  | 0.819914 |
| 25 | Palestine | 1996 | 1.078497 | 0.818714 |
| 26 | Palestine | 1997 | 1.046346 | 0.793599 |
| 27 | Palestine | 1998 | 1.00854  | 0.764127 |
| 28 | Palestine | 1999 | 0.968609 | 0.734114 |
| 29 | Palestine | 2000 | 0.941176 | 0.712675 |
| 30 |           |      |          |          |
| 31 |           |      |          |          |
| 32 |           |      |          |          |
| 33 |           |      |          |          |
| 34 |           |      |          |          |
| 35 |           |      |          |          |
| 36 |           |      |          |          |
| 37 |           |      |          |          |
| 38 |           |      |          |          |
| 39 |           |      |          |          |
| 40 |           |      |          |          |
| 41 |           |      |          |          |
| 42 |           |      |          |          |
| 43 |           |      |          |          |
| 44 |           |      |          |          |
| 45 |           |      |          |          |
| 46 |           |      |          |          |

|           |      |          |          |
|-----------|------|----------|----------|
| Palestine | 2001 | 0.911024 | 0.687406 |
| Palestine | 2002 | 0.883868 | 0.663667 |
| Palestine | 2003 | 0.868165 | 0.64945  |
| Palestine | 2004 | 0.866073 | 0.644743 |
| Palestine | 2005 | 0.862481 | 0.641533 |
| Palestine | 2006 | 0.86778  | 0.645021 |
| Palestine | 2007 | 0.888549 | 0.660241 |
| Palestine | 2008 | 0.918877 | 0.687188 |
| Palestine | 2009 | 0.938756 | 0.70351  |
| Palestine | 2010 | 0.97194  | 0.724081 |
| Palestine | 2011 | 0.972628 | 0.724938 |
| Palestine | 2012 | 0.957763 | 0.721228 |
| Palestine | 2013 | 0.962405 | 0.732859 |
| Palestine | 2014 | 0.945347 | 0.721619 |
| Palestine | 2015 | 0.981757 | 0.74991  |
| Palestine | 2016 | 1.030033 | 0.788183 |
| Palestine | 2017 | 1.031354 | 0.790637 |
| Palestine | 2018 | 1.009338 | 0.781943 |
| Palestine | 2019 | 1.007945 | 0.795501 |
| Panama    | 1990 | 0.684806 | 0.673883 |
| Panama    | 1991 | 0.662354 | 0.648572 |
| Panama    | 1992 | 0.682867 | 0.663984 |
| Panama    | 1993 | 0.622521 | 0.60272  |
| Panama    | 1994 | 0.632837 | 0.60781  |
| Panama    | 1995 | 0.609146 | 0.578484 |

1  
2  
3  
4  
5  
6  
7  
8  
9  
10  
11  
12  
13  
14  
15  
16  
17  
18  
19  
20  
21  
22  
23  
24  
25  
26  
27  
28  
29  
30  
31  
32  
33  
34  
35  
36  
37  
38  
39  
40  
41  
42  
43  
44  
45  
46

|                  |      |          |          |
|------------------|------|----------|----------|
| Panama           | 1996 | 0.649564 | 0.611483 |
| Panama           | 1997 | 0.695155 | 0.650684 |
| Panama           | 1998 | 0.755965 | 0.707313 |
| Panama           | 1999 | 0.726618 | 0.67976  |
| Panama           | 2000 | 0.755907 | 0.704044 |
| Panama           | 2001 | 0.753036 | 0.698864 |
| Panama           | 2002 | 0.744099 | 0.687659 |
| Panama           | 2003 | 0.745748 | 0.685298 |
| Panama           | 2004 | 0.776886 | 0.713745 |
| Panama           | 2005 | 0.74812  | 0.688865 |
| Panama           | 2006 | 0.721141 | 0.662738 |
| Panama           | 2007 | 0.704199 | 0.645755 |
| Panama           | 2008 | 0.673904 | 0.615725 |
| Panama           | 2009 | 0.672603 | 0.61248  |
| Panama           | 2010 | 0.660371 | 0.597237 |
| Panama           | 2011 | 0.680747 | 0.613704 |
| Panama           | 2012 | 0.671265 | 0.603026 |
| Panama           | 2013 | 0.709723 | 0.637278 |
| Panama           | 2014 | 0.703626 | 0.631    |
| Panama           | 2015 | 0.696567 | 0.623082 |
| Panama           | 2016 | 0.695587 | 0.620452 |
| Panama           | 2017 | 0.686796 | 0.611485 |
| Panama           | 2018 | 0.70711  | 0.629843 |
| Panama           | 2019 | 0.702706 | 0.625932 |
| Papua New Guinea | 1990 | 0.510353 | 0.520489 |

|                  |      |          |          |
|------------------|------|----------|----------|
| Papua New Guinea | 1991 | 0.507586 | 0.517922 |
| Papua New Guinea | 1992 | 0.507342 | 0.516734 |
| Papua New Guinea | 1993 | 0.505816 | 0.514488 |
| Papua New Guinea | 1994 | 0.504687 | 0.513087 |
| Papua New Guinea | 1995 | 0.503742 | 0.512226 |
| Papua New Guinea | 1996 | 0.507201 | 0.51616  |
| Papua New Guinea | 1997 | 0.510876 | 0.518938 |
| Papua New Guinea | 1998 | 0.51547  | 0.522528 |
| Papua New Guinea | 1999 | 0.518813 | 0.525667 |
| Papua New Guinea | 2000 | 0.520481 | 0.527957 |
| Papua New Guinea | 2001 | 0.520252 | 0.52839  |
| Papua New Guinea | 2002 | 0.521909 | 0.529584 |
| Papua New Guinea | 2003 | 0.522595 | 0.530408 |
| Papua New Guinea | 2004 | 0.523892 | 0.532711 |
| Papua New Guinea | 2005 | 0.520392 | 0.530805 |
| Papua New Guinea | 2006 | 0.522667 | 0.534894 |
| Papua New Guinea | 2007 | 0.521963 | 0.535709 |
| Papua New Guinea | 2008 | 0.515748 | 0.531163 |
| Papua New Guinea | 2009 | 0.51058  | 0.528153 |
| Papua New Guinea | 2010 | 0.50998  | 0.528219 |
| Papua New Guinea | 2011 | 0.504127 | 0.522987 |
| Papua New Guinea | 2012 | 0.499902 | 0.520138 |
| Papua New Guinea | 2013 | 0.494541 | 0.517163 |
| Papua New Guinea | 2014 | 0.490763 | 0.51518  |
| Papua New Guinea | 2015 | 0.490012 | 0.516154 |

|    |                  |      |          |          |
|----|------------------|------|----------|----------|
| 1  |                  |      |          |          |
| 2  |                  |      |          |          |
| 3  |                  |      |          |          |
| 4  |                  |      |          |          |
| 5  | Papua New Guinea | 2016 | 0.488799 | 0.517054 |
| 6  | Papua New Guinea | 2017 | 0.489673 | 0.518489 |
| 7  | Papua New Guinea | 2018 | 0.488274 | 0.517236 |
| 8  | Papua New Guinea | 2019 | 0.487062 | 0.516906 |
| 9  |                  |      |          |          |
| 10 | Paraguay         | 1990 | 0.87285  | 0.733251 |
| 11 | Paraguay         | 1991 | 0.871421 | 0.73538  |
| 12 | Paraguay         | 1992 | 0.861984 | 0.731253 |
| 13 | Paraguay         | 1993 | 0.893227 | 0.763558 |
| 14 | Paraguay         | 1994 | 0.874891 | 0.750756 |
| 15 | Paraguay         | 1995 | 0.891905 | 0.767908 |
| 16 | Paraguay         | 1996 | 0.894482 | 0.771026 |
| 17 | Paraguay         | 1997 | 0.90991  | 0.786707 |
| 18 | Paraguay         | 1998 | 0.891224 | 0.772082 |
| 19 | Paraguay         | 1999 | 0.892023 | 0.776159 |
| 20 | Paraguay         | 2000 | 0.908794 | 0.790837 |
| 21 | Paraguay         | 2001 | 0.900237 | 0.782912 |
| 22 | Paraguay         | 2002 | 0.900709 | 0.784708 |
| 23 | Paraguay         | 2003 | 0.899833 | 0.784946 |
| 24 | Paraguay         | 2004 | 0.905188 | 0.78769  |
| 25 | Paraguay         | 2005 | 0.906572 | 0.78923  |
| 26 | Paraguay         | 2006 | 0.919604 | 0.800699 |
| 27 | Paraguay         | 2007 | 0.895242 | 0.778963 |
| 28 | Paraguay         | 2008 | 0.8998   | 0.782922 |
| 29 | Paraguay         | 2009 | 0.887053 | 0.770607 |
| 30 | Paraguay         | 2010 | 0.889014 | 0.769331 |
| 31 |                  |      |          |          |
| 32 |                  |      |          |          |
| 33 |                  |      |          |          |
| 34 |                  |      |          |          |
| 35 |                  |      |          |          |
| 36 |                  |      |          |          |
| 37 |                  |      |          |          |
| 38 |                  |      |          |          |
| 39 |                  |      |          |          |
| 40 |                  |      |          |          |
| 41 |                  |      |          |          |
| 42 |                  |      |          |          |
| 43 |                  |      |          |          |
| 44 |                  |      |          |          |
| 45 |                  |      |          |          |
| 46 |                  |      |          |          |

|    |          |      |          |          |
|----|----------|------|----------|----------|
| 1  |          |      |          |          |
| 2  |          |      |          |          |
| 3  |          |      |          |          |
| 4  |          |      |          |          |
| 5  | Paraguay | 2011 | 0.893574 | 0.772361 |
| 6  | Paraguay | 2012 | 0.880004 | 0.758167 |
| 7  | Paraguay | 2013 | 0.894597 | 0.76836  |
| 8  | Paraguay | 2014 | 0.863302 | 0.743413 |
| 9  | Paraguay | 2015 | 0.829355 | 0.715781 |
| 10 | Paraguay | 2016 | 0.841111 | 0.72518  |
| 11 | Paraguay | 2017 | 0.843696 | 0.726201 |
| 12 | Paraguay | 2018 | 0.843366 | 0.725494 |
| 13 | Paraguay | 2019 | 0.836684 | 0.71842  |
| 14 | Peru     | 1990 | 0.913601 | 0.863955 |
| 15 | Peru     | 1991 | 1.00472  | 0.948777 |
| 16 | Peru     | 1992 | 1.044879 | 0.98688  |
| 17 | Peru     | 1993 | 1.027759 | 0.970272 |
| 18 | Peru     | 1994 | 1.115356 | 1.054376 |
| 19 | Peru     | 1995 | 1.156215 | 1.097468 |
| 20 | Peru     | 1996 | 1.083906 | 1.03572  |
| 21 | Peru     | 1997 | 1.079265 | 1.033944 |
| 22 | Peru     | 1998 | 1.084938 | 1.038903 |
| 23 | Peru     | 1999 | 1.053269 | 1.008394 |
| 24 | Peru     | 2000 | 1.05003  | 1.00284  |
| 25 | Peru     | 2001 | 1.015949 | 0.966888 |
| 26 | Peru     | 2002 | 1.021084 | 0.968834 |
| 27 | Peru     | 2003 | 1.050852 | 0.995309 |
| 28 | Peru     | 2004 | 1.010514 | 0.953906 |
| 29 | Peru     | 2005 | 1.011217 | 0.949196 |
| 30 |          |      |          |          |
| 31 |          |      |          |          |
| 32 |          |      |          |          |
| 33 |          |      |          |          |
| 34 |          |      |          |          |
| 35 |          |      |          |          |
| 36 |          |      |          |          |
| 37 |          |      |          |          |
| 38 |          |      |          |          |
| 39 |          |      |          |          |
| 40 |          |      |          |          |
| 41 |          |      |          |          |
| 42 |          |      |          |          |
| 43 |          |      |          |          |
| 44 |          |      |          |          |
| 45 |          |      |          |          |
| 46 |          |      |          |          |



|             |      |          |          |
|-------------|------|----------|----------|
| Peru        | 2006 | 0.971567 | 0.907069 |
| Peru        | 2007 | 0.93459  | 0.868534 |
| Peru        | 2008 | 0.964408 | 0.891577 |
| Peru        | 2009 | 1.005513 | 0.925821 |
| Peru        | 2010 | 1.016288 | 0.931538 |
| Peru        | 2011 | 1.030177 | 0.940505 |
| Peru        | 2012 | 1.051711 | 0.956412 |
| Peru        | 2013 | 1.058485 | 0.95881  |
| Peru        | 2014 | 1.067343 | 0.963477 |
| Peru        | 2015 | 1.06634  | 0.959772 |
| Peru        | 2016 | 1.074129 | 0.96437  |
| Peru        | 2017 | 1.089316 | 0.975806 |
| Peru        | 2018 | 1.098656 | 0.982166 |
| Peru        | 2019 | 1.110745 | 0.990734 |
| Philippines | 1990 | 0.895381 | 0.902283 |
| Philippines | 1991 | 0.880509 | 0.883263 |
| Philippines | 1992 | 0.881702 | 0.876569 |
| Philippines | 1993 | 0.877133 | 0.864402 |
| Philippines | 1994 | 0.86956  | 0.85266  |
| Philippines | 1995 | 0.87258  | 0.852439 |
| Philippines | 1996 | 0.866278 | 0.838327 |
| Philippines | 1997 | 0.8542   | 0.812544 |
| Philippines | 1998 | 0.847416 | 0.798709 |
| Philippines | 1999 | 0.848855 | 0.801611 |
| Philippines | 2000 | 0.854486 | 0.804787 |

|             |      |          |          |
|-------------|------|----------|----------|
| Philippines | 2001 | 0.854201 | 0.80103  |
| Philippines | 2002 | 0.85769  | 0.80353  |
| Philippines | 2003 | 0.847201 | 0.792661 |
| Philippines | 2004 | 0.843162 | 0.788747 |
| Philippines | 2005 | 0.841734 | 0.787366 |
| Philippines | 2006 | 0.834808 | 0.780353 |
| Philippines | 2007 | 0.832589 | 0.775666 |
| Philippines | 2008 | 0.838592 | 0.777601 |
| Philippines | 2009 | 0.835108 | 0.770345 |
| Philippines | 2010 | 0.829964 | 0.764372 |
| Philippines | 2011 | 0.827424 | 0.758476 |
| Philippines | 2012 | 0.838945 | 0.763847 |
| Philippines | 2013 | 0.85046  | 0.770959 |
| Philippines | 2014 | 0.840941 | 0.760785 |
| Philippines | 2015 | 0.845221 | 0.761678 |
| Philippines | 2016 | 0.843903 | 0.758905 |
| Philippines | 2017 | 0.852911 | 0.768268 |
| Philippines | 2018 | 0.858187 | 0.773633 |
| Philippines | 2019 | 0.859915 | 0.775107 |
| Poland      | 1990 | 0.917881 | 0.594086 |
| Poland      | 1991 | 0.90409  | 0.580834 |
| Poland      | 1992 | 0.919908 | 0.58486  |
| Poland      | 1993 | 0.946987 | 0.594748 |
| Poland      | 1994 | 0.960281 | 0.600366 |
| Poland      | 1995 | 0.958064 | 0.595011 |

|    |          |      |          |          |
|----|----------|------|----------|----------|
| 1  |          |      |          |          |
| 2  |          |      |          |          |
| 3  |          |      |          |          |
| 4  |          |      |          |          |
| 5  | Poland   | 1996 | 0.985587 | 0.604305 |
| 6  | Poland   | 1997 | 0.999282 | 0.608044 |
| 7  | Poland   | 1998 | 1.016292 | 0.611599 |
| 8  | Poland   | 1999 | 1.025894 | 0.611673 |
| 9  | Poland   | 2000 | 1.053107 | 0.615915 |
| 10 | Poland   | 2001 | 1.045756 | 0.604648 |
| 11 | Poland   | 2002 | 1.042927 | 0.59748  |
| 12 | Poland   | 2003 | 1.038911 | 0.591794 |
| 13 | Poland   | 2004 | 1.041969 | 0.592438 |
| 14 | Poland   | 2005 | 1.070954 | 0.608519 |
| 15 | Poland   | 2006 | 1.101807 | 0.627874 |
| 16 | Poland   | 2007 | 1.126684 | 0.643817 |
| 17 | Poland   | 2008 | 1.09441  | 0.626611 |
| 18 | Poland   | 2009 | 1.086273 | 0.622186 |
| 19 | Poland   | 2010 | 1.050341 | 0.600421 |
| 20 | Poland   | 2011 | 1.022768 | 0.5837   |
| 21 | Poland   | 2012 | 1.045657 | 0.594587 |
| 22 | Poland   | 2013 | 1.06034  | 0.600538 |
| 23 | Poland   | 2014 | 1.095376 | 0.617875 |
| 24 | Poland   | 2015 | 1.090725 | 0.612589 |
| 25 | Poland   | 2016 | 1.085856 | 0.609823 |
| 26 | Poland   | 2017 | 1.063426 | 0.59996  |
| 27 | Poland   | 2018 | 1.053713 | 0.59652  |
| 28 | Poland   | 2019 | 1.043147 | 0.59288  |
| 29 | Poland   | 2019 | 1.043147 | 0.59288  |
| 30 | Poland   | 2019 | 1.043147 | 0.59288  |
| 31 | Poland   | 2019 | 1.043147 | 0.59288  |
| 32 | Poland   | 2019 | 1.043147 | 0.59288  |
| 33 | Poland   | 2019 | 1.043147 | 0.59288  |
| 34 | Poland   | 2019 | 1.043147 | 0.59288  |
| 35 | Poland   | 2019 | 1.043147 | 0.59288  |
| 36 | Poland   | 2019 | 1.043147 | 0.59288  |
| 37 | Portugal | 1990 | 0.884262 | 0.543926 |
| 38 |          |      |          |          |
| 39 |          |      |          |          |
| 40 |          |      |          |          |
| 41 |          |      |          |          |
| 42 |          |      |          |          |
| 43 |          |      |          |          |
| 44 |          |      |          |          |
| 45 |          |      |          |          |
| 46 |          |      |          |          |

|          |      |          |          |
|----------|------|----------|----------|
| Portugal | 1991 | 0.890398 | 0.549614 |
| Portugal | 1992 | 0.887748 | 0.548645 |
| Portugal | 1993 | 0.905257 | 0.559067 |
| Portugal | 1994 | 0.934888 | 0.578709 |
| Portugal | 1995 | 0.954761 | 0.593079 |
| Portugal | 1996 | 0.955694 | 0.595236 |
| Portugal | 1997 | 0.983491 | 0.612126 |
| Portugal | 1998 | 0.9847   | 0.611874 |
| Portugal | 1999 | 0.994401 | 0.611865 |
| Portugal | 2000 | 1.014619 | 0.622443 |
| Portugal | 2001 | 1.023922 | 0.627747 |
| Portugal | 2002 | 1.046333 | 0.641815 |
| Portugal | 2003 | 1.071809 | 0.658259 |
| Portugal | 2004 | 1.082705 | 0.665587 |
| Portugal | 2005 | 1.100718 | 0.675084 |
| Portugal | 2006 | 1.117627 | 0.682107 |
| Portugal | 2007 | 1.12877  | 0.685484 |
| Portugal | 2008 | 1.135725 | 0.684655 |
| Portugal | 2009 | 1.158093 | 0.693652 |
| Portugal | 2010 | 1.181695 | 0.701173 |
| Portugal | 2011 | 1.212089 | 0.712886 |
| Portugal | 2012 | 1.214154 | 0.709169 |
| Portugal | 2013 | 1.223854 | 0.710161 |
| Portugal | 2014 | 1.23894  | 0.71278  |
| Portugal | 2015 | 1.253346 | 0.718468 |

|             |      |          |          |
|-------------|------|----------|----------|
| Portugal    | 2016 | 1.250497 | 0.714503 |
| Portugal    | 2017 | 1.242519 | 0.710662 |
| Portugal    | 2018 | 1.247566 | 0.715337 |
| Portugal    | 2019 | 1.242236 | 0.713636 |
| Puerto Rico | 1990 | 0.80275  | 0.669891 |
| Puerto Rico | 1991 | 0.809018 | 0.669491 |
| Puerto Rico | 1992 | 0.805713 | 0.661874 |
| Puerto Rico | 1993 | 0.80907  | 0.659305 |
| Puerto Rico | 1994 | 0.823879 | 0.665447 |
| Puerto Rico | 1995 | 0.795614 | 0.637683 |
| Puerto Rico | 1996 | 0.821616 | 0.653485 |
| Puerto Rico | 1997 | 0.806042 | 0.636572 |
| Puerto Rico | 1998 | 0.783507 | 0.61465  |
| Puerto Rico | 1999 | 0.830368 | 0.646628 |
| Puerto Rico | 2000 | 0.847044 | 0.655127 |
| Puerto Rico | 2001 | 0.813541 | 0.623902 |
| Puerto Rico | 2002 | 0.837027 | 0.636125 |
| Puerto Rico | 2003 | 0.849227 | 0.641471 |
| Puerto Rico | 2004 | 0.851207 | 0.638502 |
| Puerto Rico | 2005 | 0.819532 | 0.609731 |
| Puerto Rico | 2006 | 0.828059 | 0.610677 |
| Puerto Rico | 2007 | 0.851411 | 0.623053 |
| Puerto Rico | 2008 | 0.870717 | 0.634801 |
| Puerto Rico | 2009 | 0.835635 | 0.606872 |
| Puerto Rico | 2010 | 0.873679 | 0.632793 |

|    |             |      |          |          |
|----|-------------|------|----------|----------|
| 1  |             |      |          |          |
| 2  |             |      |          |          |
| 3  |             |      |          |          |
| 4  |             |      |          |          |
| 5  | Puerto Rico | 2011 | 0.865857 | 0.627258 |
| 6  | Puerto Rico | 2012 | 0.864947 | 0.620861 |
| 7  | Puerto Rico | 2013 | 0.87645  | 0.628923 |
| 8  | Puerto Rico | 2014 | 0.887603 | 0.635695 |
| 9  | Puerto Rico | 2015 | 0.868531 | 0.617416 |
| 10 | Puerto Rico | 2016 | 0.888741 | 0.631972 |
| 11 | Puerto Rico | 2017 | 0.888622 | 0.629582 |
| 12 | Puerto Rico | 2018 | 0.911225 | 0.642743 |
| 13 | Puerto Rico | 2019 | 0.924823 | 0.650285 |
| 14 | Puerto Rico | 2019 | 0.924823 | 0.650285 |
| 15 | Puerto Rico | 2019 | 0.924823 | 0.650285 |
| 16 | Puerto Rico | 2019 | 0.924823 | 0.650285 |
| 17 | Qatar       | 1990 | 0.952955 | 1.265583 |
| 18 | Qatar       | 1991 | 0.901362 | 1.196006 |
| 19 | Qatar       | 1992 | 0.878474 | 1.194201 |
| 20 | Qatar       | 1993 | 0.898298 | 1.317721 |
| 21 | Qatar       | 1994 | 0.910554 | 1.544928 |
| 22 | Qatar       | 1995 | 0.875373 | 1.597969 |
| 23 | Qatar       | 1996 | 0.813587 | 1.370316 |
| 24 | Qatar       | 1997 | 0.763374 | 1.260175 |
| 25 | Qatar       | 1998 | 0.741687 | 1.250523 |
| 26 | Qatar       | 1999 | 0.752939 | 1.33758  |
| 27 | Qatar       | 2000 | 0.763105 | 1.470088 |
| 28 | Qatar       | 2001 | 0.776966 | 1.566502 |
| 29 | Qatar       | 2002 | 0.775655 | 1.635752 |
| 30 | Qatar       | 2003 | 0.76026  | 1.672719 |
| 31 | Qatar       | 2004 | 0.769387 | 1.81363  |
| 32 | Qatar       | 2005 | 0.780175 | 1.889947 |
| 33 | Qatar       | 2005 | 0.780175 | 1.889947 |
| 34 | Qatar       | 2005 | 0.780175 | 1.889947 |
| 35 | Qatar       | 2005 | 0.780175 | 1.889947 |
| 36 | Qatar       | 2005 | 0.780175 | 1.889947 |
| 37 | Qatar       | 2005 | 0.780175 | 1.889947 |
| 38 | Qatar       | 2005 | 0.780175 | 1.889947 |
| 39 |             |      |          |          |
| 40 |             |      |          |          |
| 41 |             |      |          |          |
| 42 |             |      |          |          |
| 43 |             |      |          |          |
| 44 |             |      |          |          |
| 45 |             |      |          |          |
| 46 |             |      |          |          |

1  
2  
3  
4  
5  
6  
7  
8  
9  
10  
11  
12  
13  
14  
15  
16  
17  
18  
19  
20  
21  
22  
23  
24  
25  
26  
27  
28  
29  
30  
31  
32  
33  
34  
35  
36  
37  
38  
39  
40  
41  
42  
43  
44  
45  
46

|                   |      |          |          |
|-------------------|------|----------|----------|
| Qatar             | 2006 | 0.75546  | 1.899169 |
| Qatar             | 2007 | 0.740074 | 1.926302 |
| Qatar             | 2008 | 0.708016 | 1.953539 |
| Qatar             | 2009 | 0.686412 | 2.077397 |
| Qatar             | 2010 | 0.675395 | 2.109451 |
| Qatar             | 2011 | 0.652704 | 2.009032 |
| Qatar             | 2012 | 0.635437 | 1.934902 |
| Qatar             | 2013 | 0.645644 | 1.98802  |
| Qatar             | 2014 | 0.649426 | 1.950938 |
| Qatar             | 2015 | 0.59925  | 1.734004 |
| Qatar             | 2016 | 0.609361 | 1.770803 |
| Qatar             | 2017 | 0.624812 | 1.811416 |
| Qatar             | 2018 | 0.631227 | 1.877501 |
| Qatar             | 2019 | 0.623123 | 1.904559 |
| Republic of Korea | 1990 | 0.857258 | 0.549206 |
| Republic of Korea | 1991 | 0.875952 | 0.551973 |
| Republic of Korea | 1992 | 0.905363 | 0.563273 |
| Republic of Korea | 1993 | 0.922645 | 0.569835 |
| Republic of Korea | 1994 | 0.927687 | 0.567936 |
| Republic of Korea | 1995 | 0.968644 | 0.600595 |
| Republic of Korea | 1996 | 0.983011 | 0.618658 |
| Republic of Korea | 1997 | 1.005261 | 0.628044 |
| Republic of Korea | 1998 | 1.022196 | 0.634332 |
| Republic of Korea | 1999 | 1.047436 | 0.6421   |
| Republic of Korea | 2000 | 1.072308 | 0.652147 |

|    |                     |      |          |          |
|----|---------------------|------|----------|----------|
| 1  |                     |      |          |          |
| 2  |                     |      |          |          |
| 3  |                     |      |          |          |
| 4  |                     |      |          |          |
| 5  | Republic of Korea   | 2001 | 1.084258 | 0.656648 |
| 6  | Republic of Korea   | 2002 | 1.098332 | 0.660852 |
| 7  | Republic of Korea   | 2003 | 1.097612 | 0.658917 |
| 8  | Republic of Korea   | 2004 | 1.07524  | 0.647505 |
| 9  | Republic of Korea   | 2005 | 1.071843 | 0.64214  |
| 10 | Republic of Korea   | 2006 | 1.053906 | 0.631558 |
| 11 | Republic of Korea   | 2007 | 1.044885 | 0.623151 |
| 12 | Republic of Korea   | 2008 | 1.029952 | 0.613718 |
| 13 | Republic of Korea   | 2009 | 1.024996 | 0.609758 |
| 14 | Republic of Korea   | 2010 | 1.018097 | 0.600666 |
| 15 | Republic of Korea   | 2011 | 1.014423 | 0.595254 |
| 16 | Republic of Korea   | 2012 | 1.014457 | 0.594651 |
| 17 | Republic of Korea   | 2013 | 1.016761 | 0.598625 |
| 18 | Republic of Korea   | 2014 | 1.009222 | 0.597557 |
| 19 | Republic of Korea   | 2015 | 1.013167 | 0.598706 |
| 20 | Republic of Korea   | 2016 | 1.015444 | 0.601958 |
| 21 | Republic of Korea   | 2017 | 1.00616  | 0.602647 |
| 22 | Republic of Korea   | 2018 | 1.025879 | 0.621714 |
| 23 | Republic of Korea   | 2019 | 1.022686 | 0.625971 |
| 24 | Republic of Moldova | 1990 | 0.848599 | 0.515396 |
| 25 | Republic of Moldova | 1991 | 0.818752 | 0.511245 |
| 26 | Republic of Moldova | 1992 | 0.812354 | 0.508411 |
| 27 | Republic of Moldova | 1993 | 0.824758 | 0.520016 |
| 28 | Republic of Moldova | 1994 | 0.758844 | 0.496269 |
| 29 | Republic of Moldova | 1995 | 0.723716 | 0.482553 |
| 30 |                     |      |          |          |
| 31 |                     |      |          |          |
| 32 |                     |      |          |          |
| 33 |                     |      |          |          |
| 34 |                     |      |          |          |
| 35 |                     |      |          |          |
| 36 |                     |      |          |          |
| 37 |                     |      |          |          |
| 38 |                     |      |          |          |
| 39 |                     |      |          |          |
| 40 |                     |      |          |          |
| 41 |                     |      |          |          |
| 42 |                     |      |          |          |
| 43 |                     |      |          |          |
| 44 |                     |      |          |          |
| 45 |                     |      |          |          |
| 46 |                     |      |          |          |



|    |                     |      |          |          |
|----|---------------------|------|----------|----------|
| 1  |                     |      |          |          |
| 2  |                     |      |          |          |
| 3  |                     |      |          |          |
| 4  |                     |      |          |          |
| 5  | Republic of Moldova | 1996 | 0.715793 | 0.47752  |
| 6  | Republic of Moldova | 1997 | 0.74865  | 0.492646 |
| 7  | Republic of Moldova | 1998 | 0.729586 | 0.478633 |
| 8  | Republic of Moldova | 1999 | 0.75475  | 0.494013 |
| 9  | Republic of Moldova | 2000 | 0.786413 | 0.514092 |
| 10 | Republic of Moldova | 2001 | 0.805144 | 0.526969 |
| 11 | Republic of Moldova | 2002 | 0.881436 | 0.580425 |
| 12 | Republic of Moldova | 2003 | 0.920664 | 0.606418 |
| 13 | Republic of Moldova | 2004 | 0.883634 | 0.573869 |
| 14 | Republic of Moldova | 2005 | 0.825192 | 0.541935 |
| 15 | Republic of Moldova | 2006 | 0.878413 | 0.571388 |
| 16 | Republic of Moldova | 2007 | 0.941002 | 0.612718 |
| 17 | Republic of Moldova | 2008 | 0.957584 | 0.626718 |
| 18 | Republic of Moldova | 2009 | 0.965352 | 0.637306 |
| 19 | Republic of Moldova | 2010 | 0.955516 | 0.637033 |
| 20 | Republic of Moldova | 2011 | 0.986443 | 0.647917 |
| 21 | Republic of Moldova | 2012 | 1.008266 | 0.659343 |
| 22 | Republic of Moldova | 2013 | 1.062256 | 0.694627 |
| 23 | Republic of Moldova | 2014 | 1.059157 | 0.69576  |
| 24 | Republic of Moldova | 2015 | 1.00229  | 0.644196 |
| 25 | Republic of Moldova | 2016 | 1.059686 | 0.666742 |
| 26 | Republic of Moldova | 2017 | 1.114566 | 0.69188  |
| 27 | Republic of Moldova | 2018 | 1.082026 | 0.672992 |
| 28 | Republic of Moldova | 2019 | 1.044547 | 0.651103 |
| 29 | Romania             | 1990 | 1.079553 | 0.866268 |
| 30 |                     |      |          |          |
| 31 |                     |      |          |          |
| 32 |                     |      |          |          |
| 33 |                     |      |          |          |
| 34 |                     |      |          |          |
| 35 |                     |      |          |          |
| 36 |                     |      |          |          |
| 37 |                     |      |          |          |
| 38 |                     |      |          |          |
| 39 |                     |      |          |          |
| 40 |                     |      |          |          |
| 41 |                     |      |          |          |
| 42 |                     |      |          |          |
| 43 |                     |      |          |          |
| 44 |                     |      |          |          |
| 45 |                     |      |          |          |
| 46 |                     |      |          |          |

|         |      |          |          |
|---------|------|----------|----------|
| Romania | 1991 | 1.086222 | 0.862351 |
| Romania | 1992 | 1.046153 | 0.826138 |
| Romania | 1993 | 1.029617 | 0.80953  |
| Romania | 1994 | 1.012606 | 0.792177 |
| Romania | 1995 | 1.000688 | 0.777709 |
| Romania | 1996 | 0.983609 | 0.758064 |
| Romania | 1997 | 0.959848 | 0.733464 |
| Romania | 1998 | 0.981335 | 0.736681 |
| Romania | 1999 | 0.997782 | 0.738726 |
| Romania | 2000 | 0.994107 | 0.73164  |
| Romania | 2001 | 0.956077 | 0.70287  |
| Romania | 2002 | 0.951443 | 0.694438 |
| Romania | 2003 | 0.945295 | 0.685769 |
| Romania | 2004 | 0.936806 | 0.672382 |
| Romania | 2005 | 0.962369 | 0.686111 |
| Romania | 2006 | 0.981261 | 0.695823 |
| Romania | 2007 | 1.005379 | 0.708652 |
| Romania | 2008 | 0.989066 | 0.694823 |
| Romania | 2009 | 0.998743 | 0.697203 |
| Romania | 2010 | 0.99074  | 0.686144 |
| Romania | 2011 | 1.001066 | 0.685511 |
| Romania | 2012 | 0.997056 | 0.677662 |
| Romania | 2013 | 1.01578  | 0.685032 |
| Romania | 2014 | 1.005041 | 0.674832 |
| Romania | 2015 | 1.007222 | 0.673017 |

|                    |      |          |          |
|--------------------|------|----------|----------|
| Romania            | 2016 | 1.00319  | 0.668504 |
| Romania            | 2017 | 1.008839 | 0.671674 |
| Romania            | 2018 | 1.002935 | 0.667179 |
| Romania            | 2019 | 1.007882 | 0.667713 |
| Russian Federation | 1990 | 1.237604 | 0.690445 |
| Russian Federation | 1991 | 1.240021 | 0.696266 |
| Russian Federation | 1992 | 1.175419 | 0.674369 |
| Russian Federation | 1993 | 1.095619 | 0.649003 |
| Russian Federation | 1994 | 1.066959 | 0.643526 |
| Russian Federation | 1995 | 1.088154 | 0.651418 |
| Russian Federation | 1996 | 1.13313  | 0.665031 |
| Russian Federation | 1997 | 1.192142 | 0.685413 |
| Russian Federation | 1998 | 1.203965 | 0.68899  |
| Russian Federation | 1999 | 1.163027 | 0.676473 |
| Russian Federation | 2000 | 1.12748  | 0.660553 |
| Russian Federation | 2001 | 1.143098 | 0.666437 |
| Russian Federation | 2002 | 1.151992 | 0.668583 |
| Russian Federation | 2003 | 1.154748 | 0.670397 |
| Russian Federation | 2004 | 1.162412 | 0.672801 |
| Russian Federation | 2005 | 1.157706 | 0.672401 |
| Russian Federation | 2006 | 1.19925  | 0.68176  |
| Russian Federation | 2007 | 1.232211 | 0.690174 |
| Russian Federation | 2008 | 1.223246 | 0.681691 |
| Russian Federation | 2009 | 1.255663 | 0.690114 |
| Russian Federation | 2010 | 1.250566 | 0.683559 |

|    |                    |      |          |          |
|----|--------------------|------|----------|----------|
| 1  |                    |      |          |          |
| 2  |                    |      |          |          |
| 3  |                    |      |          |          |
| 4  |                    |      |          |          |
| 5  | Russian Federation | 2011 | 1.286702 | 0.694845 |
| 6  | Russian Federation | 2012 | 1.295215 | 0.692835 |
| 7  | Russian Federation | 2013 | 1.305034 | 0.693218 |
| 8  | Russian Federation | 2014 | 1.302006 | 0.689733 |
| 9  | Russian Federation | 2015 | 1.334409 | 0.703311 |
| 10 | Russian Federation | 2016 | 1.344511 | 0.707135 |
| 11 | Russian Federation | 2017 | 1.394103 | 0.731382 |
| 12 | Russian Federation | 2018 | 1.394549 | 0.735282 |
| 13 | Russian Federation | 2019 | 1.381232 | 0.732034 |
| 14 | Rwanda             | 1990 | 0.824395 | 0.650032 |
| 15 | Rwanda             | 1991 | 0.81081  | 0.639775 |
| 16 | Rwanda             | 1992 | 0.782385 | 0.617991 |
| 17 | Rwanda             | 1993 | 0.760105 | 0.601291 |
| 18 | Rwanda             | 1994 | 0.756358 | 0.581929 |
| 19 | Rwanda             | 1995 | 0.759429 | 0.566516 |
| 20 | Rwanda             | 1996 | 0.759521 | 0.566825 |
| 21 | Rwanda             | 1997 | 0.765052 | 0.5693   |
| 22 | Rwanda             | 1998 | 0.787475 | 0.580555 |
| 23 | Rwanda             | 1999 | 0.816803 | 0.597427 |
| 24 | Rwanda             | 2000 | 0.829663 | 0.603649 |
| 25 | Rwanda             | 2001 | 0.843068 | 0.611413 |
| 26 | Rwanda             | 2002 | 0.852925 | 0.615855 |
| 27 | Rwanda             | 2003 | 0.865838 | 0.623707 |
| 28 | Rwanda             | 2004 | 0.873066 | 0.62669  |
| 29 | Rwanda             | 2005 | 0.876651 | 0.629256 |
| 30 |                    |      |          |          |
| 31 |                    |      |          |          |
| 32 |                    |      |          |          |
| 33 |                    |      |          |          |
| 34 |                    |      |          |          |
| 35 |                    |      |          |          |
| 36 |                    |      |          |          |
| 37 |                    |      |          |          |
| 38 |                    |      |          |          |
| 39 |                    |      |          |          |
| 40 |                    |      |          |          |
| 41 |                    |      |          |          |
| 42 |                    |      |          |          |
| 43 |                    |      |          |          |
| 44 |                    |      |          |          |
| 45 |                    |      |          |          |
| 46 |                    |      |          |          |

|                       |      |          |          |
|-----------------------|------|----------|----------|
| Rwanda                | 2006 | 0.874617 | 0.628897 |
| Rwanda                | 2007 | 0.878535 | 0.630917 |
| Rwanda                | 2008 | 0.887536 | 0.635571 |
| Rwanda                | 2009 | 0.895936 | 0.641741 |
| Rwanda                | 2010 | 0.908779 | 0.649458 |
| Rwanda                | 2011 | 0.918745 | 0.656101 |
| Rwanda                | 2012 | 0.926945 | 0.661974 |
| Rwanda                | 2013 | 0.939974 | 0.672839 |
| Rwanda                | 2014 | 0.956287 | 0.683731 |
| Rwanda                | 2015 | 0.969773 | 0.693098 |
| Rwanda                | 2016 | 0.978654 | 0.701247 |
| Rwanda                | 2017 | 0.990168 | 0.711922 |
| Rwanda                | 2018 | 0.998336 | 0.721102 |
| Rwanda                | 2019 | 1.006308 | 0.729699 |
| Saint Kitts and Nevis | 1990 | 0.977618 | 0.720692 |
| Saint Kitts and Nevis | 1991 | 0.777526 | 0.583399 |
| Saint Kitts and Nevis | 1992 | 0.785881 | 0.582392 |
| Saint Kitts and Nevis | 1993 | 0.805116 | 0.592521 |
| Saint Kitts and Nevis | 1994 | 0.839028 | 0.608603 |
| Saint Kitts and Nevis | 1995 | 0.876303 | 0.63063  |
| Saint Kitts and Nevis | 1996 | 0.864655 | 0.621258 |
| Saint Kitts and Nevis | 1997 | 0.863032 | 0.618292 |
| Saint Kitts and Nevis | 1998 | 0.870163 | 0.623277 |
| Saint Kitts and Nevis | 1999 | 0.883872 | 0.634954 |
| Saint Kitts and Nevis | 2000 | 0.915314 | 0.659458 |

|    |                       |      |          |          |
|----|-----------------------|------|----------|----------|
| 1  |                       |      |          |          |
| 2  |                       |      |          |          |
| 3  |                       |      |          |          |
| 4  |                       |      |          |          |
| 5  | Saint Kitts and Nevis | 2001 | 0.928859 | 0.671865 |
| 6  | Saint Kitts and Nevis | 2002 | 0.937404 | 0.681404 |
| 7  | Saint Kitts and Nevis | 2003 | 0.933207 | 0.684634 |
| 8  | Saint Kitts and Nevis | 2004 | 0.939514 | 0.703626 |
| 9  | Saint Kitts and Nevis | 2005 | 0.924993 | 0.701387 |
| 10 | Saint Kitts and Nevis | 2006 | 0.919201 | 0.70406  |
| 11 | Saint Kitts and Nevis | 2007 | 0.915181 | 0.707981 |
| 12 | Saint Kitts and Nevis | 2008 | 0.952305 | 0.723867 |
| 13 | Saint Kitts and Nevis | 2009 | 0.968373 | 0.732117 |
| 14 | Saint Kitts and Nevis | 2010 | 0.954543 | 0.723024 |
| 15 | Saint Kitts and Nevis | 2011 | 0.948111 | 0.715818 |
| 16 | Saint Kitts and Nevis | 2012 | 0.924673 | 0.698322 |
| 17 | Saint Kitts and Nevis | 2013 | 0.918237 | 0.695838 |
| 18 | Saint Kitts and Nevis | 2014 | 0.906135 | 0.692654 |
| 19 | Saint Kitts and Nevis | 2015 | 0.881642 | 0.680331 |
| 20 | Saint Kitts and Nevis | 2016 | 0.867707 | 0.674668 |
| 21 | Saint Kitts and Nevis | 2017 | 0.850948 | 0.666632 |
| 22 | Saint Kitts and Nevis | 2018 | 0.831812 | 0.66427  |
| 23 | Saint Kitts and Nevis | 2019 | 0.750426 | 0.666059 |
| 24 | Saint Lucia           | 1990 | 0.820367 | 0.585517 |
| 25 | Saint Lucia           | 1991 | 0.834488 | 0.602001 |
| 26 | Saint Lucia           | 1992 | 0.850757 | 0.616906 |
| 27 | Saint Lucia           | 1993 | 0.849089 | 0.617068 |
| 28 | Saint Lucia           | 1994 | 0.839079 | 0.615244 |
| 29 | Saint Lucia           | 1995 | 0.835752 | 0.620428 |
| 30 |                       |      |          |          |
| 31 |                       |      |          |          |
| 32 |                       |      |          |          |
| 33 |                       |      |          |          |
| 34 |                       |      |          |          |
| 35 |                       |      |          |          |
| 36 |                       |      |          |          |
| 37 |                       |      |          |          |
| 38 |                       |      |          |          |
| 39 |                       |      |          |          |
| 40 |                       |      |          |          |
| 41 |                       |      |          |          |
| 42 |                       |      |          |          |
| 43 |                       |      |          |          |
| 44 |                       |      |          |          |
| 45 |                       |      |          |          |
| 46 |                       |      |          |          |

|    |                                  |      |          |          |
|----|----------------------------------|------|----------|----------|
| 1  |                                  |      |          |          |
| 2  |                                  |      |          |          |
| 3  |                                  |      |          |          |
| 4  |                                  |      |          |          |
| 5  | Saint Lucia                      | 1996 | 0.802615 | 0.604438 |
| 6  | Saint Lucia                      | 1997 | 0.774274 | 0.589376 |
| 7  | Saint Lucia                      | 1998 | 0.782389 | 0.602523 |
| 8  | Saint Lucia                      | 1999 | 0.790826 | 0.617421 |
| 9  | Saint Lucia                      | 2000 | 0.790218 | 0.620439 |
| 10 | Saint Lucia                      | 2001 | 0.777224 | 0.604588 |
| 11 | Saint Lucia                      | 2002 | 0.758923 | 0.587237 |
| 12 | Saint Lucia                      | 2003 | 0.760145 | 0.586709 |
| 13 | Saint Lucia                      | 2004 | 0.775105 | 0.596586 |
| 14 | Saint Lucia                      | 2005 | 0.798511 | 0.615856 |
| 15 | Saint Lucia                      | 2006 | 0.810371 | 0.630761 |
| 16 | Saint Lucia                      | 2007 | 0.751768 | 0.58511  |
| 17 | Saint Lucia                      | 2008 | 0.741994 | 0.577525 |
| 18 | Saint Lucia                      | 2009 | 0.750507 | 0.586573 |
| 19 | Saint Lucia                      | 2010 | 0.760554 | 0.601201 |
| 20 | Saint Lucia                      | 2011 | 0.809689 | 0.64893  |
| 21 | Saint Lucia                      | 2012 | 0.822286 | 0.664903 |
| 22 | Saint Lucia                      | 2013 | 0.799342 | 0.645977 |
| 23 | Saint Lucia                      | 2014 | 0.801771 | 0.650044 |
| 24 | Saint Lucia                      | 2015 | 0.793431 | 0.646977 |
| 25 | Saint Lucia                      | 2016 | 0.788999 | 0.642229 |
| 26 | Saint Lucia                      | 2017 | 0.784017 | 0.638882 |
| 27 | Saint Lucia                      | 2018 | 0.780336 | 0.636198 |
| 28 | Saint Lucia                      | 2019 | 0.778887 | 0.635259 |
| 29 | Saint Vincent and the Grenadines | 1990 | 1.055811 | 0.779191 |
| 30 |                                  |      |          |          |
| 31 |                                  |      |          |          |
| 32 |                                  |      |          |          |
| 33 |                                  |      |          |          |
| 34 |                                  |      |          |          |
| 35 |                                  |      |          |          |
| 36 |                                  |      |          |          |
| 37 |                                  |      |          |          |
| 38 |                                  |      |          |          |
| 39 |                                  |      |          |          |
| 40 |                                  |      |          |          |
| 41 |                                  |      |          |          |
| 42 |                                  |      |          |          |
| 43 |                                  |      |          |          |
| 44 |                                  |      |          |          |
| 45 |                                  |      |          |          |
| 46 |                                  |      |          |          |

|    |                                  |      |          |          |
|----|----------------------------------|------|----------|----------|
| 1  |                                  |      |          |          |
| 2  |                                  |      |          |          |
| 3  |                                  |      |          |          |
| 4  |                                  |      |          |          |
| 5  | Saint Vincent and the Grenadines | 1991 | 1.060365 | 0.797731 |
| 6  | Saint Vincent and the Grenadines | 1992 | 1.059923 | 0.810912 |
| 7  | Saint Vincent and the Grenadines | 1993 | 1.059589 | 0.821744 |
| 8  | Saint Vincent and the Grenadines | 1994 | 1.069537 | 0.844344 |
| 9  | Saint Vincent and the Grenadines | 1995 | 0.990095 | 0.786788 |
| 10 | Saint Vincent and the Grenadines | 1996 | 0.92571  | 0.739108 |
| 11 | Saint Vincent and the Grenadines | 1997 | 0.894478 | 0.717007 |
| 12 | Saint Vincent and the Grenadines | 1998 | 0.881609 | 0.708572 |
| 13 | Saint Vincent and the Grenadines | 1999 | 0.895191 | 0.717596 |
| 14 | Saint Vincent and the Grenadines | 2000 | 0.906901 | 0.727819 |
| 15 | Saint Vincent and the Grenadines | 2001 | 0.941204 | 0.766283 |
| 16 | Saint Vincent and the Grenadines | 2002 | 0.931621 | 0.760813 |
| 17 | Saint Vincent and the Grenadines | 2003 | 0.921101 | 0.754886 |
| 18 | Saint Vincent and the Grenadines | 2004 | 0.923713 | 0.758606 |
| 19 | Saint Vincent and the Grenadines | 2005 | 0.929897 | 0.771784 |
| 20 | Saint Vincent and the Grenadines | 2006 | 0.913858 | 0.763832 |
| 21 | Saint Vincent and the Grenadines | 2007 | 0.919976 | 0.775243 |
| 22 | Saint Vincent and the Grenadines | 2008 | 0.938457 | 0.802308 |
| 23 | Saint Vincent and the Grenadines | 2009 | 0.962495 | 0.834135 |
| 24 | Saint Vincent and the Grenadines | 2010 | 0.971071 | 0.849322 |
| 25 | Saint Vincent and the Grenadines | 2011 | 0.979049 | 0.865898 |
| 26 | Saint Vincent and the Grenadines | 2012 | 0.956986 | 0.863578 |
| 27 | Saint Vincent and the Grenadines | 2013 | 0.933168 | 0.860723 |
| 28 | Saint Vincent and the Grenadines | 2014 | 0.921409 | 0.863582 |
| 29 | Saint Vincent and the Grenadines | 2015 | 0.907507 | 0.86158  |
| 30 |                                  |      |          |          |
| 31 |                                  |      |          |          |
| 32 |                                  |      |          |          |
| 33 |                                  |      |          |          |
| 34 |                                  |      |          |          |
| 35 |                                  |      |          |          |
| 36 |                                  |      |          |          |
| 37 |                                  |      |          |          |
| 38 |                                  |      |          |          |
| 39 |                                  |      |          |          |
| 40 |                                  |      |          |          |
| 41 |                                  |      |          |          |
| 42 |                                  |      |          |          |
| 43 |                                  |      |          |          |
| 44 |                                  |      |          |          |
| 45 |                                  |      |          |          |
| 46 |                                  |      |          |          |



|    |                                  |      |          |          |
|----|----------------------------------|------|----------|----------|
| 1  |                                  |      |          |          |
| 2  |                                  |      |          |          |
| 3  |                                  |      |          |          |
| 4  |                                  |      |          |          |
| 5  | Saint Vincent and the Grenadines | 2016 | 0.873985 | 0.842537 |
| 6  | Saint Vincent and the Grenadines | 2017 | 0.859361 | 0.837012 |
| 7  | Saint Vincent and the Grenadines | 2018 | 0.845672 | 0.830576 |
| 8  | Saint Vincent and the Grenadines | 2019 | 0.833823 | 0.82454  |
| 9  |                                  |      |          |          |
| 10 | Samoa                            | 1990 | 0.980132 | 0.843734 |
| 11 | Samoa                            | 1991 | 1.000796 | 0.860756 |
| 12 | Samoa                            | 1992 | 1.023771 | 0.880098 |
| 13 | Samoa                            | 1993 | 1.031447 | 0.887633 |
| 14 | Samoa                            | 1994 | 1.049276 | 0.904544 |
| 15 | Samoa                            | 1995 | 1.068083 | 0.922056 |
| 16 | Samoa                            | 1996 | 1.09226  | 0.944345 |
| 17 | Samoa                            | 1997 | 1.116858 | 0.967899 |
| 18 | Samoa                            | 1998 | 1.143322 | 0.993029 |
| 19 | Samoa                            | 1999 | 1.164018 | 1.012467 |
| 20 | Samoa                            | 2000 | 1.177392 | 1.024988 |
| 21 | Samoa                            | 2001 | 1.172274 | 1.021756 |
| 22 | Samoa                            | 2002 | 1.173842 | 1.024537 |
| 23 | Samoa                            | 2003 | 1.149307 | 1.003549 |
| 24 | Samoa                            | 2004 | 1.138468 | 0.993735 |
| 25 | Samoa                            | 2005 | 1.108915 | 0.967133 |
| 26 | Samoa                            | 2006 | 1.073711 | 0.93589  |
| 27 | Samoa                            | 2007 | 1.042902 | 0.907576 |
| 28 | Samoa                            | 2008 | 1.016908 | 0.884179 |
| 29 | Samoa                            | 2009 | 0.997005 | 0.866721 |
| 30 | Samoa                            | 2010 | 0.976604 | 0.849334 |
| 31 |                                  |      |          |          |
| 32 |                                  |      |          |          |
| 33 |                                  |      |          |          |
| 34 |                                  |      |          |          |
| 35 |                                  |      |          |          |
| 36 |                                  |      |          |          |
| 37 |                                  |      |          |          |
| 38 |                                  |      |          |          |
| 39 |                                  |      |          |          |
| 40 |                                  |      |          |          |
| 41 |                                  |      |          |          |
| 42 |                                  |      |          |          |
| 43 |                                  |      |          |          |
| 44 |                                  |      |          |          |
| 45 |                                  |      |          |          |
| 46 |                                  |      |          |          |

|    |            |      |          |          |
|----|------------|------|----------|----------|
| 1  |            |      |          |          |
| 2  |            |      |          |          |
| 3  |            |      |          |          |
| 4  |            |      |          |          |
| 5  | Samoa      | 2011 | 0.979265 | 0.852803 |
| 6  | Samoa      | 2012 | 0.968264 | 0.845265 |
| 7  | Samoa      | 2013 | 0.953319 | 0.834396 |
| 8  | Samoa      | 2014 | 0.945781 | 0.83022  |
| 9  | Samoa      | 2015 | 0.951454 | 0.837853 |
| 10 | Samoa      | 2016 | 0.955475 | 0.844459 |
| 11 | Samoa      | 2017 | 0.95904  | 0.851083 |
| 12 | Samoa      | 2018 | 0.959346 | 0.855019 |
| 13 | Samoa      | 2019 | 0.959927 | 0.859111 |
| 14 | San Marino | 1990 | 1.040527 | 0.662137 |
| 15 | San Marino | 1991 | 1.034054 | 0.656258 |
| 16 | San Marino | 1992 | 1.028794 | 0.650989 |
| 17 | San Marino | 1993 | 1.017848 | 0.641779 |
| 18 | San Marino | 1994 | 1.014914 | 0.637147 |
| 19 | San Marino | 1995 | 1.022855 | 0.638643 |
| 20 | San Marino | 1996 | 1.013723 | 0.629773 |
| 21 | San Marino | 1997 | 1.0178   | 0.629635 |
| 22 | San Marino | 1998 | 1.035194 | 0.637541 |
| 23 | San Marino | 1999 | 1.043112 | 0.639273 |
| 24 | San Marino | 2000 | 1.061203 | 0.647772 |
| 25 | San Marino | 2001 | 1.10068  | 0.670472 |
| 26 | San Marino | 2002 | 1.14621  | 0.698311 |
| 27 | San Marino | 2003 | 1.202461 | 0.735765 |
| 28 | San Marino | 2004 | 1.23389  | 0.760178 |
| 29 | San Marino | 2005 | 1.268334 | 0.786763 |
| 30 |            |      |          |          |
| 31 |            |      |          |          |
| 32 |            |      |          |          |
| 33 |            |      |          |          |
| 34 |            |      |          |          |
| 35 |            |      |          |          |
| 36 |            |      |          |          |
| 37 |            |      |          |          |
| 38 |            |      |          |          |
| 39 |            |      |          |          |
| 40 |            |      |          |          |
| 41 |            |      |          |          |
| 42 |            |      |          |          |
| 43 |            |      |          |          |
| 44 |            |      |          |          |
| 45 |            |      |          |          |
| 46 |            |      |          |          |

|                       |      |          |          |
|-----------------------|------|----------|----------|
| San Marino            | 2006 | 1.273335 | 0.794871 |
| San Marino            | 2007 | 1.275614 | 0.800868 |
| San Marino            | 2008 | 1.277743 | 0.806368 |
| San Marino            | 2009 | 1.28295  | 0.813942 |
| San Marino            | 2010 | 1.285141 | 0.819464 |
| San Marino            | 2011 | 1.287608 | 0.82488  |
| San Marino            | 2012 | 1.291652 | 0.831402 |
| San Marino            | 2013 | 1.289952 | 0.834102 |
| San Marino            | 2014 | 1.286467 | 0.835325 |
| San Marino            | 2015 | 1.283363 | 0.83659  |
| San Marino            | 2016 | 1.277029 | 0.835106 |
| San Marino            | 2017 | 1.264401 | 0.829351 |
| San Marino            | 2018 | 1.251972 | 0.823236 |
| San Marino            | 2019 | 1.24039  | 0.817325 |
| Sao Tome and Principe | 1990 | 1.091374 | 0.933524 |
| Sao Tome and Principe | 1991 | 1.113804 | 0.953047 |
| Sao Tome and Principe | 1992 | 1.139972 | 0.980625 |
| Sao Tome and Principe | 1993 | 1.215059 | 1.081878 |
| Sao Tome and Principe | 1994 | 1.239155 | 1.109895 |
| Sao Tome and Principe | 1995 | 1.238259 | 1.114617 |
| Sao Tome and Principe | 1996 | 1.244594 | 1.125181 |
| Sao Tome and Principe | 1997 | 1.254845 | 1.138117 |
| Sao Tome and Principe | 1998 | 1.258592 | 1.1408   |
| Sao Tome and Principe | 1999 | 1.273254 | 1.152136 |
| Sao Tome and Principe | 2000 | 1.308013 | 1.172362 |

|    |                       |      |          |          |
|----|-----------------------|------|----------|----------|
| 1  |                       |      |          |          |
| 2  |                       |      |          |          |
| 3  |                       |      |          |          |
| 4  |                       |      |          |          |
| 5  | Sao Tome and Principe | 2001 | 1.29916  | 1.159733 |
| 6  | Sao Tome and Principe | 2002 | 1.282631 | 1.149629 |
| 7  | Sao Tome and Principe | 2003 | 1.269253 | 1.131711 |
| 8  | Sao Tome and Principe | 2004 | 1.255308 | 1.12558  |
| 9  | Sao Tome and Principe | 2005 | 1.212922 | 1.088347 |
| 10 | Sao Tome and Principe | 2006 | 1.221649 | 1.093759 |
| 11 | Sao Tome and Principe | 2007 | 1.246116 | 1.111153 |
| 12 | Sao Tome and Principe | 2008 | 1.226771 | 1.095035 |
| 13 | Sao Tome and Principe | 2009 | 1.23417  | 1.099047 |
| 14 | Sao Tome and Principe | 2010 | 1.258555 | 1.117148 |
| 15 | Sao Tome and Principe | 2011 | 1.232555 | 1.096997 |
| 16 | Sao Tome and Principe | 2012 | 1.205056 | 1.075871 |
| 17 | Sao Tome and Principe | 2013 | 1.198096 | 1.069787 |
| 18 | Sao Tome and Principe | 2014 | 1.213287 | 1.080153 |
| 19 | Sao Tome and Principe | 2015 | 1.213986 | 1.080881 |
| 20 | Sao Tome and Principe | 2016 | 1.216079 | 1.082527 |
| 21 | Sao Tome and Principe | 2017 | 1.219651 | 1.086355 |
| 22 | Sao Tome and Principe | 2018 | 1.220924 | 1.08889  |
| 23 | Sao Tome and Principe | 2019 | 1.219127 | 1.08909  |
| 24 | Saudi Arabia          | 1990 | 0.695398 | 0.829786 |
| 25 | Saudi Arabia          | 1991 | 0.712169 | 0.854348 |
| 26 | Saudi Arabia          | 1992 | 0.719496 | 0.867184 |
| 27 | Saudi Arabia          | 1993 | 0.727002 | 0.878748 |
| 28 | Saudi Arabia          | 1994 | 0.742709 | 0.898777 |
| 29 | Saudi Arabia          | 1995 | 0.761874 | 0.922789 |
| 30 |                       |      |          |          |
| 31 |                       |      |          |          |
| 32 |                       |      |          |          |
| 33 |                       |      |          |          |
| 34 |                       |      |          |          |
| 35 |                       |      |          |          |
| 36 |                       |      |          |          |
| 37 |                       |      |          |          |
| 38 |                       |      |          |          |
| 39 |                       |      |          |          |
| 40 |                       |      |          |          |
| 41 |                       |      |          |          |
| 42 |                       |      |          |          |
| 43 |                       |      |          |          |
| 44 |                       |      |          |          |
| 45 |                       |      |          |          |
| 46 |                       |      |          |          |

|    |              |      |          |          |
|----|--------------|------|----------|----------|
| 1  |              |      |          |          |
| 2  |              |      |          |          |
| 3  |              |      |          |          |
| 4  |              |      |          |          |
| 5  | Saudi Arabia | 1996 | 0.784305 | 0.947356 |
| 6  | Saudi Arabia | 1997 | 0.804263 | 0.967726 |
| 7  | Saudi Arabia | 1998 | 0.810679 | 0.973063 |
| 8  | Saudi Arabia | 1999 | 0.816395 | 0.976741 |
| 9  | Saudi Arabia | 2000 | 0.820477 | 0.983554 |
| 10 | Saudi Arabia | 2001 | 0.821211 | 0.976888 |
| 11 | Saudi Arabia | 2002 | 0.827178 | 0.977433 |
| 12 | Saudi Arabia | 2003 | 0.822493 | 0.962185 |
| 13 | Saudi Arabia | 2004 | 0.821679 | 0.95553  |
| 14 | Saudi Arabia | 2005 | 0.815244 | 0.948694 |
| 15 | Saudi Arabia | 2006 | 0.810154 | 0.94029  |
| 16 | Saudi Arabia | 2007 | 0.800765 | 0.931723 |
| 17 | Saudi Arabia | 2008 | 0.786844 | 0.922069 |
| 18 | Saudi Arabia | 2009 | 0.772323 | 0.91303  |
| 19 | Saudi Arabia | 2010 | 0.76119  | 0.911913 |
| 20 | Saudi Arabia | 2011 | 0.745556 | 0.899816 |
| 21 | Saudi Arabia | 2012 | 0.73911  | 0.89891  |
| 22 | Saudi Arabia | 2013 | 0.736146 | 0.907402 |
| 23 | Saudi Arabia | 2014 | 0.739157 | 0.923105 |
| 24 | Saudi Arabia | 2015 | 0.740954 | 0.940363 |
| 25 | Saudi Arabia | 2016 | 0.745207 | 0.95483  |
| 26 | Saudi Arabia | 2017 | 0.752481 | 0.975445 |
| 27 | Saudi Arabia | 2018 | 0.758989 | 0.995576 |
| 28 | Saudi Arabia | 2019 | 0.763422 | 1.013679 |
| 29 | Senegal      | 1990 | 0.884747 | 0.858724 |
| 30 |              |      |          |          |
| 31 |              |      |          |          |
| 32 |              |      |          |          |
| 33 |              |      |          |          |
| 34 |              |      |          |          |
| 35 |              |      |          |          |
| 36 |              |      |          |          |
| 37 |              |      |          |          |
| 38 |              |      |          |          |
| 39 |              |      |          |          |
| 40 |              |      |          |          |
| 41 |              |      |          |          |
| 42 |              |      |          |          |
| 43 |              |      |          |          |
| 44 |              |      |          |          |
| 45 |              |      |          |          |
| 46 |              |      |          |          |

|         |      |          |          |
|---------|------|----------|----------|
| Senegal | 1991 | 0.891844 | 0.862058 |
| Senegal | 1992 | 0.896679 | 0.863392 |
| Senegal | 1993 | 0.898105 | 0.862398 |
| Senegal | 1994 | 0.899111 | 0.862183 |
| Senegal | 1995 | 0.899343 | 0.859763 |
| Senegal | 1996 | 0.898532 | 0.857803 |
| Senegal | 1997 | 0.886586 | 0.844268 |
| Senegal | 1998 | 0.88376  | 0.840365 |
| Senegal | 1999 | 0.881527 | 0.836596 |
| Senegal | 2000 | 0.879275 | 0.831594 |
| Senegal | 2001 | 0.872506 | 0.825969 |
| Senegal | 2002 | 0.870204 | 0.822799 |
| Senegal | 2003 | 0.873973 | 0.821234 |
| Senegal | 2004 | 0.850079 | 0.798413 |
| Senegal | 2005 | 0.827835 | 0.77646  |
| Senegal | 2006 | 0.808141 | 0.756535 |
| Senegal | 2007 | 0.794045 | 0.741842 |
| Senegal | 2008 | 0.77887  | 0.72756  |
| Senegal | 2009 | 0.767907 | 0.716548 |
| Senegal | 2010 | 0.767865 | 0.711673 |
| Senegal | 2011 | 0.767131 | 0.709302 |
| Senegal | 2012 | 0.765409 | 0.707099 |
| Senegal | 2013 | 0.761534 | 0.704161 |
| Senegal | 2014 | 0.764675 | 0.707866 |
| Senegal | 2015 | 0.770795 | 0.712137 |

|    |         |      |          |          |
|----|---------|------|----------|----------|
| 5  | Senegal | 2016 | 0.779506 | 0.720298 |
| 6  | Senegal | 2017 | 0.787654 | 0.727948 |
| 7  | Senegal | 2018 | 0.79524  | 0.735888 |
| 9  | Senegal | 2019 | 0.802915 | 0.743064 |
| 10 | Serbia  | 1990 | 0.73799  | 0.603061 |
| 11 | Serbia  | 1991 | 0.751915 | 0.61215  |
| 12 | Serbia  | 1992 | 0.745895 | 0.598418 |
| 13 | Serbia  | 1993 | 0.766901 | 0.611856 |
| 14 | Serbia  | 1994 | 0.781888 | 0.620647 |
| 15 | Serbia  | 1995 | 0.792746 | 0.626364 |
| 16 | Serbia  | 1996 | 0.802507 | 0.635855 |
| 17 | Serbia  | 1997 | 0.815138 | 0.652642 |
| 18 | Serbia  | 1998 | 0.778837 | 0.621888 |
| 19 | Serbia  | 1999 | 0.794648 | 0.623776 |
| 20 | Serbia  | 2000 | 0.769534 | 0.605957 |
| 21 | Serbia  | 2001 | 0.77247  | 0.605364 |
| 22 | Serbia  | 2002 | 0.734907 | 0.574323 |
| 23 | Serbia  | 2003 | 0.746359 | 0.581392 |
| 24 | Serbia  | 2004 | 0.746084 | 0.578442 |
| 25 | Serbia  | 2005 | 0.760475 | 0.588941 |
| 26 | Serbia  | 2006 | 0.76393  | 0.589334 |
| 27 | Serbia  | 2007 | 0.77937  | 0.595466 |
| 28 | Serbia  | 2008 | 0.801348 | 0.61088  |
| 29 | Serbia  | 2009 | 0.83196  | 0.636222 |
| 30 | Serbia  | 2010 | 0.852949 | 0.653777 |

|            |      |          |          |
|------------|------|----------|----------|
| Serbia     | 2011 | 0.863156 | 0.660403 |
| Serbia     | 2012 | 0.88227  | 0.670731 |
| Serbia     | 2013 | 0.853039 | 0.639376 |
| Serbia     | 2014 | 0.87394  | 0.650601 |
| Serbia     | 2015 | 0.899328 | 0.670437 |
| Serbia     | 2016 | 0.926887 | 0.690613 |
| Serbia     | 2017 | 0.925711 | 0.690169 |
| Serbia     | 2018 | 0.933605 | 0.693648 |
| Serbia     | 2019 | 0.933707 | 0.696426 |
| Seychelles | 1990 | 1.017107 | 0.702428 |
| Seychelles | 1991 | 1.020898 | 0.697742 |
| Seychelles | 1992 | 1.022397 | 0.693457 |
| Seychelles | 1993 | 1.02782  | 0.692034 |
| Seychelles | 1994 | 1.017442 | 0.68456  |
| Seychelles | 1995 | 1.016606 | 0.679526 |
| Seychelles | 1996 | 1.045304 | 0.695115 |
| Seychelles | 1997 | 1.092161 | 0.725276 |
| Seychelles | 1998 | 1.128929 | 0.75104  |
| Seychelles | 1999 | 1.142566 | 0.765246 |
| Seychelles | 2000 | 1.186127 | 0.802943 |
| Seychelles | 2001 | 1.202158 | 0.822396 |
| Seychelles | 2002 | 1.188011 | 0.82041  |
| Seychelles | 2003 | 1.171268 | 0.813173 |
| Seychelles | 2004 | 1.209464 | 0.842131 |
| Seychelles | 2005 | 1.169282 | 0.805472 |



|              |      |          |          |
|--------------|------|----------|----------|
| Seychelles   | 2006 | 1.185979 | 0.818787 |
| Seychelles   | 2007 | 1.214313 | 0.845111 |
| Seychelles   | 2008 | 1.2311   | 0.859386 |
| Seychelles   | 2009 | 1.197098 | 0.834808 |
| Seychelles   | 2010 | 1.212228 | 0.867157 |
| Seychelles   | 2011 | 1.228304 | 0.902733 |
| Seychelles   | 2012 | 1.192854 | 0.880645 |
| Seychelles   | 2013 | 1.216633 | 0.907188 |
| Seychelles   | 2014 | 1.212517 | 0.925165 |
| Seychelles   | 2015 | 1.169363 | 0.915602 |
| Seychelles   | 2016 | 1.134994 | 0.909444 |
| Seychelles   | 2017 | 1.109851 | 0.89732  |
| Seychelles   | 2018 | 1.097048 | 0.897572 |
| Seychelles   | 2019 | 1.082504 | 0.898742 |
| Sierra Leone | 1990 | 0.787919 | 0.795377 |
| Sierra Leone | 1991 | 0.790962 | 0.792612 |
| Sierra Leone | 1992 | 0.792598 | 0.791321 |
| Sierra Leone | 1993 | 0.792881 | 0.789444 |
| Sierra Leone | 1994 | 0.810527 | 0.795239 |
| Sierra Leone | 1995 | 0.815354 | 0.795979 |
| Sierra Leone | 1996 | 0.830066 | 0.804332 |
| Sierra Leone | 1997 | 0.84446  | 0.812131 |
| Sierra Leone | 1998 | 0.851017 | 0.812806 |
| Sierra Leone | 1999 | 0.863143 | 0.810965 |
| Sierra Leone | 2000 | 0.867725 | 0.81152  |

|    |              |      |          |          |
|----|--------------|------|----------|----------|
| 1  |              |      |          |          |
| 2  |              |      |          |          |
| 3  |              |      |          |          |
| 4  |              |      |          |          |
| 5  | Sierra Leone | 2001 | 0.870057 | 0.807892 |
| 6  | Sierra Leone | 2002 | 0.88269  | 0.814524 |
| 7  | Sierra Leone | 2003 | 0.887295 | 0.814107 |
| 8  | Sierra Leone | 2004 | 0.904772 | 0.819484 |
| 9  | Sierra Leone | 2005 | 0.902009 | 0.816075 |
| 10 | Sierra Leone | 2006 | 0.904874 | 0.816248 |
| 11 | Sierra Leone | 2007 | 0.908455 | 0.817708 |
| 12 | Sierra Leone | 2008 | 0.9111   | 0.81823  |
| 13 | Sierra Leone | 2009 | 0.916357 | 0.819564 |
| 14 | Sierra Leone | 2010 | 0.905713 | 0.815749 |
| 15 | Sierra Leone | 2011 | 0.90687  | 0.815569 |
| 16 | Sierra Leone | 2012 | 0.900591 | 0.815611 |
| 17 | Sierra Leone | 2013 | 0.898045 | 0.816791 |
| 18 | Sierra Leone | 2014 | 0.901668 | 0.824467 |
| 19 | Sierra Leone | 2015 | 0.894141 | 0.823506 |
| 20 | Sierra Leone | 2016 | 0.895925 | 0.830446 |
| 21 | Sierra Leone | 2017 | 0.895543 | 0.833929 |
| 22 | Sierra Leone | 2018 | 0.89368  | 0.835265 |
| 23 | Sierra Leone | 2019 | 0.891018 | 0.836793 |
| 24 | Singapore    | 1990 | 1.163438 | 0.899451 |
| 25 | Singapore    | 1991 | 1.129393 | 0.881363 |
| 26 | Singapore    | 1992 | 1.153563 | 0.921822 |
| 27 | Singapore    | 1993 | 1.116385 | 0.896281 |
| 28 | Singapore    | 1994 | 1.076889 | 0.845189 |
| 29 | Singapore    | 1995 | 1.050864 | 0.825318 |
| 30 |              |      |          |          |
| 31 |              |      |          |          |
| 32 |              |      |          |          |
| 33 |              |      |          |          |
| 34 |              |      |          |          |
| 35 |              |      |          |          |
| 36 |              |      |          |          |
| 37 |              |      |          |          |
| 38 |              |      |          |          |
| 39 |              |      |          |          |
| 40 |              |      |          |          |
| 41 |              |      |          |          |
| 42 |              |      |          |          |
| 43 |              |      |          |          |
| 44 |              |      |          |          |
| 45 |              |      |          |          |
| 46 |              |      |          |          |

|           |      |          |          |
|-----------|------|----------|----------|
| Singapore | 1996 | 1.071672 | 0.841391 |
| Singapore | 1997 | 1.106303 | 0.867415 |
| Singapore | 1998 | 1.083205 | 0.853333 |
| Singapore | 1999 | 1.096735 | 0.864456 |
| Singapore | 2000 | 1.107024 | 0.8751   |
| Singapore | 2001 | 1.12114  | 0.885171 |
| Singapore | 2002 | 1.135497 | 0.893845 |
| Singapore | 2003 | 1.181337 | 0.921314 |
| Singapore | 2004 | 1.240904 | 0.956691 |
| Singapore | 2005 | 1.124899 | 0.861722 |
| Singapore | 2006 | 1.140442 | 0.868721 |
| Singapore | 2007 | 1.129855 | 0.864193 |
| Singapore | 2008 | 1.16467  | 0.901644 |
| Singapore | 2009 | 1.191044 | 0.920265 |
| Singapore | 2010 | 1.184357 | 0.90915  |
| Singapore | 2011 | 1.179199 | 0.910006 |
| Singapore | 2012 | 1.200217 | 0.933094 |
| Singapore | 2013 | 1.208179 | 0.949316 |
| Singapore | 2014 | 1.211514 | 0.953871 |
| Singapore | 2015 | 1.211928 | 0.960929 |
| Singapore | 2016 | 1.199671 | 0.951955 |
| Singapore | 2017 | 1.233326 | 0.968313 |
| Singapore | 2018 | 1.219639 | 0.959599 |
| Singapore | 2019 | 1.250283 | 0.991418 |
| Slovakia  | 1990 | 0.944649 | 0.647308 |

|    |          |      |          |          |
|----|----------|------|----------|----------|
| 1  |          |      |          |          |
| 2  |          |      |          |          |
| 3  |          |      |          |          |
| 4  |          |      |          |          |
| 5  | Slovakia | 1991 | 0.976455 | 0.663918 |
| 6  | Slovakia | 1992 | 0.955654 | 0.644376 |
| 7  | Slovakia | 1993 | 0.995726 | 0.665691 |
| 8  | Slovakia | 1994 | 1.009351 | 0.670677 |
| 9  | Slovakia | 1995 | 1.017436 | 0.674329 |
| 10 | Slovakia | 1996 | 1.009444 | 0.668133 |
| 11 | Slovakia | 1997 | 1.04119  | 0.687493 |
| 12 | Slovakia | 1998 | 0.992929 | 0.652283 |
| 13 | Slovakia | 1999 | 1.009819 | 0.657257 |
| 14 | Slovakia | 2000 | 0.975233 | 0.628247 |
| 15 | Slovakia | 2001 | 1.011914 | 0.645803 |
| 16 | Slovakia | 2002 | 0.985897 | 0.625087 |
| 17 | Slovakia | 2003 | 1.008043 | 0.633926 |
| 18 | Slovakia | 2004 | 1.051345 | 0.654676 |
| 19 | Slovakia | 2005 | 1.036508 | 0.64108  |
| 20 | Slovakia | 2006 | 1.062665 | 0.651686 |
| 21 | Slovakia | 2007 | 1.109865 | 0.678383 |
| 22 | Slovakia | 2008 | 1.093175 | 0.663884 |
| 23 | Slovakia | 2009 | 1.159077 | 0.696465 |
| 24 | Slovakia | 2010 | 1.148256 | 0.682306 |
| 25 | Slovakia | 2011 | 1.191118 | 0.703254 |
| 26 | Slovakia | 2012 | 1.21351  | 0.711767 |
| 27 | Slovakia | 2013 | 1.232331 | 0.720047 |
| 28 | Slovakia | 2014 | 1.222608 | 0.714766 |
| 29 | Slovakia | 2015 | 1.233158 | 0.725429 |
| 30 |          |      |          |          |
| 31 |          |      |          |          |
| 32 |          |      |          |          |
| 33 |          |      |          |          |
| 34 |          |      |          |          |
| 35 |          |      |          |          |
| 36 |          |      |          |          |
| 37 |          |      |          |          |
| 38 |          |      |          |          |
| 39 |          |      |          |          |
| 40 |          |      |          |          |
| 41 |          |      |          |          |
| 42 |          |      |          |          |
| 43 |          |      |          |          |
| 44 |          |      |          |          |
| 45 |          |      |          |          |
| 46 |          |      |          |          |

|    |          |      |          |          |
|----|----------|------|----------|----------|
| 1  |          |      |          |          |
| 2  |          |      |          |          |
| 3  |          |      |          |          |
| 4  |          |      |          |          |
| 5  | Slovakia | 2016 | 1.258443 | 0.742765 |
| 6  | Slovakia | 2017 | 1.250698 | 0.743898 |
| 7  | Slovakia | 2018 | 1.27032  | 0.760949 |
| 8  | Slovakia | 2019 | 1.267158 | 0.765874 |
| 9  |          |      |          |          |
| 10 | Slovenia | 1990 | 1.394688 | 0.780119 |
| 11 | Slovenia | 1991 | 1.410467 | 0.783523 |
| 12 | Slovenia | 1992 | 1.400783 | 0.768944 |
| 13 | Slovenia | 1993 | 1.378885 | 0.753192 |
| 14 | Slovenia | 1994 | 1.367196 | 0.740969 |
| 15 | Slovenia | 1995 | 1.317961 | 0.708775 |
| 16 | Slovenia | 1996 | 1.350995 | 0.720329 |
| 17 | Slovenia | 1997 | 1.295705 | 0.687694 |
| 18 | Slovenia | 1998 | 1.251271 | 0.658323 |
| 19 | Slovenia | 1999 | 1.262306 | 0.65755  |
| 20 | Slovenia | 2000 | 1.298258 | 0.663913 |
| 21 | Slovenia | 2001 | 1.266181 | 0.640215 |
| 22 | Slovenia | 2002 | 1.25989  | 0.622485 |
| 23 | Slovenia | 2003 | 1.165627 | 0.569175 |
| 24 | Slovenia | 2004 | 1.286114 | 0.622716 |
| 25 | Slovenia | 2005 | 1.400384 | 0.668478 |
| 26 | Slovenia | 2006 | 1.322378 | 0.627958 |
| 27 | Slovenia | 2007 | 1.411386 | 0.663917 |
| 28 | Slovenia | 2008 | 1.384634 | 0.647061 |
| 29 | Slovenia | 2009 | 1.44464  | 0.669581 |
| 30 | Slovenia | 2010 | 1.445478 | 0.668507 |
| 31 |          |      |          |          |
| 32 |          |      |          |          |
| 33 |          |      |          |          |
| 34 |          |      |          |          |
| 35 |          |      |          |          |
| 36 |          |      |          |          |
| 37 |          |      |          |          |
| 38 |          |      |          |          |
| 39 |          |      |          |          |
| 40 |          |      |          |          |
| 41 |          |      |          |          |
| 42 |          |      |          |          |
| 43 |          |      |          |          |
| 44 |          |      |          |          |
| 45 |          |      |          |          |
| 46 |          |      |          |          |

|    |                 |      |          |          |
|----|-----------------|------|----------|----------|
| 1  |                 |      |          |          |
| 2  |                 |      |          |          |
| 3  |                 |      |          |          |
| 4  |                 |      |          |          |
| 5  | Slovenia        | 2011 | 1.438805 | 0.663727 |
| 6  | Slovenia        | 2012 | 1.439959 | 0.665578 |
| 7  | Slovenia        | 2013 | 1.378243 | 0.641181 |
| 8  | Slovenia        | 2014 | 1.367799 | 0.636246 |
| 9  | Slovenia        | 2015 | 1.284322 | 0.602005 |
| 10 | Slovenia        | 2016 | 1.278014 | 0.603165 |
| 11 | Slovenia        | 2017 | 1.264785 | 0.601053 |
| 12 | Slovenia        | 2018 | 1.263189 | 0.607731 |
| 13 | Slovenia        | 2019 | 1.258858 | 0.612691 |
| 14 | Slovenia        | 2019 | 1.258858 | 0.612691 |
| 15 | Slovenia        | 2019 | 1.258858 | 0.612691 |
| 16 | Slovenia        | 2019 | 1.258858 | 0.612691 |
| 17 | Slovenia        | 2019 | 1.258858 | 0.612691 |
| 18 | Slovenia        | 2019 | 1.258858 | 0.612691 |
| 19 | Slovenia        | 2019 | 1.258858 | 0.612691 |
| 20 | Slovenia        | 2019 | 1.258858 | 0.612691 |
| 21 | Slovenia        | 2019 | 1.258858 | 0.612691 |
| 22 | Slovenia        | 2019 | 1.258858 | 0.612691 |
| 23 | Slovenia        | 2019 | 1.258858 | 0.612691 |
| 24 | Slovenia        | 2019 | 1.258858 | 0.612691 |
| 25 | Slovenia        | 2019 | 1.258858 | 0.612691 |
| 26 | Slovenia        | 2019 | 1.258858 | 0.612691 |
| 27 | Slovenia        | 2019 | 1.258858 | 0.612691 |
| 28 | Slovenia        | 2019 | 1.258858 | 0.612691 |
| 29 | Slovenia        | 2019 | 1.258858 | 0.612691 |
| 30 | Slovenia        | 2019 | 1.258858 | 0.612691 |
| 31 | Slovenia        | 2019 | 1.258858 | 0.612691 |
| 32 | Slovenia        | 2019 | 1.258858 | 0.612691 |
| 33 | Slovenia        | 2019 | 1.258858 | 0.612691 |
| 34 | Slovenia        | 2019 | 1.258858 | 0.612691 |
| 35 | Slovenia        | 2019 | 1.258858 | 0.612691 |
| 36 | Slovenia        | 2019 | 1.258858 | 0.612691 |
| 37 | Slovenia        | 2019 | 1.258858 | 0.612691 |
| 38 | Slovenia        | 2019 | 1.258858 | 0.612691 |
| 39 | Slovenia        | 2019 | 1.258858 | 0.612691 |
| 40 | Slovenia        | 2019 | 1.258858 | 0.612691 |
| 41 | Slovenia        | 2019 | 1.258858 | 0.612691 |
| 42 | Slovenia        | 2019 | 1.258858 | 0.612691 |
| 43 | Slovenia        | 2019 | 1.258858 | 0.612691 |
| 44 | Slovenia        | 2019 | 1.258858 | 0.612691 |
| 45 | Slovenia        | 2019 | 1.258858 | 0.612691 |
| 46 | Slovenia        | 2019 | 1.258858 | 0.612691 |
|    | Solomon Islands | 1990 | 1.037928 | 1.144353 |
|    | Solomon Islands | 1991 | 1.044417 | 1.148198 |
|    | Solomon Islands | 1992 | 1.056013 | 1.156976 |
|    | Solomon Islands | 1993 | 1.066592 | 1.164159 |
|    | Solomon Islands | 1994 | 1.081983 | 1.175924 |
|    | Solomon Islands | 1995 | 1.097222 | 1.188241 |
|    | Solomon Islands | 1996 | 1.117544 | 1.206361 |
|    | Solomon Islands | 1997 | 1.138033 | 1.223701 |
|    | Solomon Islands | 1998 | 1.159552 | 1.241819 |
|    | Solomon Islands | 1999 | 1.178626 | 1.257071 |
|    | Solomon Islands | 2000 | 1.186507 | 1.258405 |
|    | Solomon Islands | 2001 | 1.182493 | 1.246874 |
|    | Solomon Islands | 2002 | 1.179042 | 1.236279 |
|    | Solomon Islands | 2003 | 1.182097 | 1.232562 |
|    | Solomon Islands | 2004 | 1.190252 | 1.233961 |
|    | Solomon Islands | 2005 | 1.191227 | 1.229107 |

1  
2  
3  
4  
5  
6  
7  
8  
9  
10  
11  
12  
13  
14  
15  
16  
17  
18  
19  
20  
21  
22  
23  
24  
25  
26  
27  
28  
29  
30  
31  
32  
33  
34  
35  
36  
37  
38  
39  
40  
41  
42  
43  
44  
45  
46

|                 |      |          |          |
|-----------------|------|----------|----------|
| Solomon Islands | 2006 | 1.175755 | 1.207357 |
| Solomon Islands | 2007 | 1.14858  | 1.174414 |
| Solomon Islands | 2008 | 1.102099 | 1.123378 |
| Solomon Islands | 2009 | 1.094535 | 1.111581 |
| Solomon Islands | 2010 | 1.074319 | 1.088844 |
| Solomon Islands | 2011 | 1.065332 | 1.078571 |
| Solomon Islands | 2012 | 1.049638 | 1.061376 |
| Solomon Islands | 2013 | 1.034952 | 1.044876 |
| Solomon Islands | 2014 | 1.026433 | 1.034451 |
| Solomon Islands | 2015 | 1.016654 | 1.022379 |
| Solomon Islands | 2016 | 1.007093 | 1.010933 |
| Solomon Islands | 2017 | 0.991614 | 0.993079 |
| Solomon Islands | 2018 | 0.970301 | 0.971456 |
| Solomon Islands | 2019 | 0.977609 | 0.976166 |
| Somalia         | 1990 | 0.750322 | 0.611496 |
| Somalia         | 1991 | 0.74324  | 0.601044 |
| Somalia         | 1992 | 0.728936 | 0.588467 |
| Somalia         | 1993 | 0.714142 | 0.574841 |
| Somalia         | 1994 | 0.705603 | 0.566449 |
| Somalia         | 1995 | 0.699071 | 0.560185 |
| Somalia         | 1996 | 0.704283 | 0.563338 |
| Somalia         | 1997 | 0.712917 | 0.569484 |
| Somalia         | 1998 | 0.723135 | 0.5768   |
| Somalia         | 1999 | 0.733781 | 0.58339  |
| Somalia         | 2000 | 0.743    | 0.588414 |

|              |      |          |          |
|--------------|------|----------|----------|
| Somalia      | 2001 | 0.755732 | 0.596479 |
| Somalia      | 2002 | 0.769071 | 0.604926 |
| Somalia      | 2003 | 0.784596 | 0.615255 |
| Somalia      | 2004 | 0.799497 | 0.62424  |
| Somalia      | 2005 | 0.813829 | 0.632367 |
| Somalia      | 2006 | 0.821399 | 0.634753 |
| Somalia      | 2007 | 0.832464 | 0.639935 |
| Somalia      | 2008 | 0.844469 | 0.644877 |
| Somalia      | 2009 | 0.85818  | 0.653139 |
| Somalia      | 2010 | 0.85573  | 0.64884  |
| Somalia      | 2011 | 0.853771 | 0.646719 |
| Somalia      | 2012 | 0.851149 | 0.646331 |
| Somalia      | 2013 | 0.850363 | 0.64823  |
| Somalia      | 2014 | 0.848187 | 0.649933 |
| Somalia      | 2015 | 0.846803 | 0.652619 |
| Somalia      | 2016 | 0.845299 | 0.654947 |
| Somalia      | 2017 | 0.842177 | 0.656193 |
| Somalia      | 2018 | 0.839293 | 0.655624 |
| Somalia      | 2019 | 0.839583 | 0.657314 |
| South Africa | 1990 | 0.872624 | 0.604062 |
| South Africa | 1991 | 0.844694 | 0.582752 |
| South Africa | 1992 | 0.912175 | 0.626358 |
| South Africa | 1993 | 0.863401 | 0.593813 |
| South Africa | 1994 | 0.89675  | 0.613044 |
| South Africa | 1995 | 0.800476 | 0.54839  |



|    |              |      |          |          |
|----|--------------|------|----------|----------|
| 5  | South Africa | 1996 | 0.806957 | 0.550274 |
| 6  | South Africa | 1997 | 0.857876 | 0.580401 |
| 7  | South Africa | 1998 | 0.839139 | 0.565984 |
| 8  | South Africa | 1999 | 0.862781 | 0.575683 |
| 9  | South Africa | 2000 | 0.883991 | 0.586252 |
| 10 | South Africa | 2001 | 0.882307 | 0.581695 |
| 11 | South Africa | 2002 | 0.886612 | 0.581614 |
| 12 | South Africa | 2003 | 0.883797 | 0.577566 |
| 13 | South Africa | 2004 | 0.881778 | 0.576085 |
| 14 | South Africa | 2005 | 0.876284 | 0.573943 |
| 15 | South Africa | 2006 | 0.875827 | 0.572977 |
| 16 | South Africa | 2007 | 0.865365 | 0.567608 |
| 17 | South Africa | 2008 | 0.86076  | 0.56512  |
| 18 | South Africa | 2009 | 0.858824 | 0.563312 |
| 19 | South Africa | 2010 | 0.859822 | 0.560691 |
| 20 | South Africa | 2011 | 0.874497 | 0.566917 |
| 21 | South Africa | 2012 | 0.883077 | 0.573793 |
| 22 | South Africa | 2013 | 0.891229 | 0.580179 |
| 23 | South Africa | 2014 | 0.904752 | 0.590606 |
| 24 | South Africa | 2015 | 0.907736 | 0.594396 |
| 25 | South Africa | 2016 | 0.90994  | 0.594798 |
| 26 | South Africa | 2017 | 0.893752 | 0.587799 |
| 27 | South Africa | 2018 | 0.874707 | 0.580501 |
| 28 | South Africa | 2019 | 0.872436 | 0.582659 |
| 29 | South Sudan  | 1990 | 0.617642 | 0.646117 |

|             |      |          |          |
|-------------|------|----------|----------|
| South Sudan | 1991 | 0.608182 | 0.639096 |
| South Sudan | 1992 | 0.59649  | 0.630499 |
| South Sudan | 1993 | 0.583919 | 0.620618 |
| South Sudan | 1994 | 0.575092 | 0.614212 |
| South Sudan | 1995 | 0.56239  | 0.606514 |
| South Sudan | 1996 | 0.563369 | 0.609884 |
| South Sudan | 1997 | 0.563668 | 0.611578 |
| South Sudan | 1998 | 0.567632 | 0.617846 |
| South Sudan | 1999 | 0.571434 | 0.623961 |
| South Sudan | 2000 | 0.574652 | 0.628503 |
| South Sudan | 2001 | 0.579118 | 0.634668 |
| South Sudan | 2002 | 0.583072 | 0.639749 |
| South Sudan | 2003 | 0.588461 | 0.647561 |
| South Sudan | 2004 | 0.592934 | 0.651815 |
| South Sudan | 2005 | 0.600938 | 0.657757 |
| South Sudan | 2006 | 0.602378 | 0.65759  |
| South Sudan | 2007 | 0.601339 | 0.654603 |
| South Sudan | 2008 | 0.600134 | 0.650473 |
| South Sudan | 2009 | 0.605369 | 0.654527 |
| South Sudan | 2010 | 0.609132 | 0.657795 |
| South Sudan | 2011 | 0.617707 | 0.666383 |
| South Sudan | 2012 | 0.626237 | 0.674514 |
| South Sudan | 2013 | 0.637096 | 0.682281 |
| South Sudan | 2014 | 0.646201 | 0.689662 |
| South Sudan | 2015 | 0.658325 | 0.698963 |

1  
2  
3  
4  
5  
6  
7  
8  
9  
10  
11  
12  
13  
14  
15  
16  
17  
18  
19  
20  
21  
22  
23  
24  
25  
26  
27  
28  
29  
30  
31  
32  
33  
34  
35  
36  
37  
38  
39  
40  
41  
42  
43  
44  
45  
46

|             |      |          |          |
|-------------|------|----------|----------|
| South Sudan | 2016 | 0.66504  | 0.704405 |
| South Sudan | 2017 | 0.668702 | 0.710524 |
| South Sudan | 2018 | 0.674969 | 0.717543 |
| South Sudan | 2019 | 0.681735 | 0.723315 |
| Spain       | 1990 | 1.141463 | 0.683647 |
| Spain       | 1991 | 1.147613 | 0.682843 |
| Spain       | 1992 | 1.158914 | 0.68726  |
| Spain       | 1993 | 1.175718 | 0.693078 |
| Spain       | 1994 | 1.192094 | 0.698995 |
| Spain       | 1995 | 1.19173  | 0.693909 |
| Spain       | 1996 | 1.207036 | 0.697607 |
| Spain       | 1997 | 1.226235 | 0.7048   |
| Spain       | 1998 | 1.217732 | 0.695168 |
| Spain       | 1999 | 1.20048  | 0.682673 |
| Spain       | 2000 | 1.228318 | 0.693744 |
| Spain       | 2001 | 1.242731 | 0.698067 |
| Spain       | 2002 | 1.238513 | 0.693436 |
| Spain       | 2003 | 1.246203 | 0.693896 |
| Spain       | 2004 | 1.251368 | 0.694341 |
| Spain       | 2005 | 1.253901 | 0.692857 |
| Spain       | 2006 | 1.261916 | 0.693236 |
| Spain       | 2007 | 1.25726  | 0.689482 |
| Spain       | 2008 | 1.266641 | 0.690584 |
| Spain       | 2009 | 1.271022 | 0.691003 |
| Spain       | 2010 | 1.264498 | 0.682622 |

|           |      |          |          |
|-----------|------|----------|----------|
| Spain     | 2011 | 1.291473 | 0.694299 |
| Spain     | 2012 | 1.314847 | 0.704675 |
| Spain     | 2013 | 1.344507 | 0.71982  |
| Spain     | 2014 | 1.360219 | 0.725666 |
| Spain     | 2015 | 1.372704 | 0.730595 |
| Spain     | 2016 | 1.381235 | 0.734868 |
| Spain     | 2017 | 1.36967  | 0.731334 |
| Spain     | 2018 | 1.393998 | 0.747474 |
| Spain     | 2019 | 1.395263 | 0.752339 |
| Sri Lanka | 1990 | 0.565329 | 0.584802 |
| Sri Lanka | 1991 | 0.578904 | 0.591445 |
| Sri Lanka | 1992 | 0.585931 | 0.589963 |
| Sri Lanka | 1993 | 0.613223 | 0.609778 |
| Sri Lanka | 1994 | 0.622568 | 0.615605 |
| Sri Lanka | 1995 | 0.602386 | 0.593602 |
| Sri Lanka | 1996 | 0.63306  | 0.6159   |
| Sri Lanka | 1997 | 0.659262 | 0.633113 |
| Sri Lanka | 1998 | 0.676796 | 0.64036  |
| Sri Lanka | 1999 | 0.692609 | 0.64573  |
| Sri Lanka | 2000 | 0.697856 | 0.645993 |
| Sri Lanka | 2001 | 0.702683 | 0.642068 |
| Sri Lanka | 2002 | 0.734883 | 0.662004 |
| Sri Lanka | 2003 | 0.748233 | 0.669226 |
| Sri Lanka | 2004 | 0.782674 | 0.693991 |
| Sri Lanka | 2005 | 0.793452 | 0.698699 |

1  
2  
3  
4  
5  
6  
7  
8  
9  
10  
11  
12  
13  
14  
15  
16  
17  
18  
19  
20  
21  
22  
23  
24  
25  
26  
27  
28  
29  
30  
31  
32  
33  
34  
35  
36  
37  
38  
39  
40  
41  
42  
43  
44  
45  
46

|           |      |          |          |
|-----------|------|----------|----------|
| Sri Lanka | 2006 | 0.819849 | 0.71548  |
| Sri Lanka | 2007 | 0.814719 | 0.702651 |
| Sri Lanka | 2008 | 0.806527 | 0.685378 |
| Sri Lanka | 2009 | 0.883706 | 0.741235 |
| Sri Lanka | 2010 | 0.855375 | 0.717334 |
| Sri Lanka | 2011 | 0.818618 | 0.683409 |
| Sri Lanka | 2012 | 0.786608 | 0.649113 |
| Sri Lanka | 2013 | 0.801781 | 0.655676 |
| Sri Lanka | 2014 | 0.796339 | 0.645695 |
| Sri Lanka | 2015 | 0.801576 | 0.645614 |
| Sri Lanka | 2016 | 0.807734 | 0.645914 |
| Sri Lanka | 2017 | 0.816588 | 0.648192 |
| Sri Lanka | 2018 | 0.838493 | 0.661592 |
| Sri Lanka | 2019 | 0.845783 | 0.662182 |
| Sudan     | 1990 | 0.915215 | 0.883364 |
| Sudan     | 1991 | 0.89466  | 0.868908 |
| Sudan     | 1992 | 0.88086  | 0.859938 |
| Sudan     | 1993 | 0.868571 | 0.852353 |
| Sudan     | 1994 | 0.862812 | 0.850964 |
| Sudan     | 1995 | 0.858514 | 0.851763 |
| Sudan     | 1996 | 0.854869 | 0.853362 |
| Sudan     | 1997 | 0.848693 | 0.851978 |
| Sudan     | 1998 | 0.841506 | 0.849976 |
| Sudan     | 1999 | 0.8354   | 0.848705 |
| Sudan     | 2000 | 0.832796 | 0.850843 |

|    |          |      |          |          |
|----|----------|------|----------|----------|
| 1  |          |      |          |          |
| 2  |          |      |          |          |
| 3  |          |      |          |          |
| 4  |          |      |          |          |
| 5  | Sudan    | 2001 | 0.834451 | 0.85806  |
| 6  | Sudan    | 2002 | 0.832769 | 0.861836 |
| 7  | Sudan    | 2003 | 0.833939 | 0.869412 |
| 8  | Sudan    | 2004 | 0.839011 | 0.879915 |
| 9  | Sudan    | 2005 | 0.849835 | 0.89299  |
| 10 | Sudan    | 2006 | 0.838268 | 0.884609 |
| 11 | Sudan    | 2007 | 0.824546 | 0.874958 |
| 12 | Sudan    | 2008 | 0.810984 | 0.865859 |
| 13 | Sudan    | 2009 | 0.802669 | 0.861309 |
| 14 | Sudan    | 2010 | 0.796912 | 0.861204 |
| 15 | Sudan    | 2011 | 0.795754 | 0.865036 |
| 16 | Sudan    | 2012 | 0.79713  | 0.870054 |
| 17 | Sudan    | 2013 | 0.8      | 0.877201 |
| 18 | Sudan    | 2014 | 0.808748 | 0.88856  |
| 19 | Sudan    | 2015 | 0.816839 | 0.901218 |
| 20 | Sudan    | 2016 | 0.822954 | 0.911158 |
| 21 | Sudan    | 2017 | 0.829787 | 0.921163 |
| 22 | Sudan    | 2018 | 0.833647 | 0.928108 |
| 23 | Sudan    | 2019 | 0.836752 | 0.93243  |
| 24 | Suriname | 1990 | 0.787543 | 0.676472 |
| 25 | Suriname | 1991 | 0.773625 | 0.664525 |
| 26 | Suriname | 1992 | 0.762927 | 0.657532 |
| 27 | Suriname | 1993 | 0.735734 | 0.635602 |
| 28 | Suriname | 1994 | 0.730993 | 0.63073  |
| 29 | Suriname | 1995 | 0.749511 | 0.643204 |
| 30 |          |      |          |          |
| 31 |          |      |          |          |
| 32 |          |      |          |          |
| 33 |          |      |          |          |
| 34 |          |      |          |          |
| 35 |          |      |          |          |
| 36 |          |      |          |          |
| 37 |          |      |          |          |
| 38 |          |      |          |          |
| 39 |          |      |          |          |
| 40 |          |      |          |          |
| 41 |          |      |          |          |
| 42 |          |      |          |          |
| 43 |          |      |          |          |
| 44 |          |      |          |          |
| 45 |          |      |          |          |
| 46 |          |      |          |          |

|          |      |          |          |
|----------|------|----------|----------|
| Suriname | 1996 | 0.753184 | 0.648987 |
| Suriname | 1997 | 0.72162  | 0.620651 |
| Suriname | 1998 | 0.689955 | 0.59407  |
| Suriname | 1999 | 0.717914 | 0.623254 |
| Suriname | 2000 | 0.729871 | 0.626825 |
| Suriname | 2001 | 0.739779 | 0.625425 |
| Suriname | 2002 | 0.768182 | 0.652205 |
| Suriname | 2003 | 0.759013 | 0.647365 |
| Suriname | 2004 | 0.789716 | 0.673453 |
| Suriname | 2005 | 0.792861 | 0.669835 |
| Suriname | 2006 | 0.809596 | 0.685651 |
| Suriname | 2007 | 0.794531 | 0.673183 |
| Suriname | 2008 | 0.783635 | 0.659421 |
| Suriname | 2009 | 0.795851 | 0.66849  |
| Suriname | 2010 | 0.777593 | 0.653797 |
| Suriname | 2011 | 0.790986 | 0.667096 |
| Suriname | 2012 | 0.803316 | 0.677208 |
| Suriname | 2013 | 0.781261 | 0.653612 |
| Suriname | 2014 | 0.786669 | 0.651621 |
| Suriname | 2015 | 0.81729  | 0.675948 |
| Suriname | 2016 | 0.837001 | 0.69061  |
| Suriname | 2017 | 0.845809 | 0.696292 |
| Suriname | 2018 | 0.857382 | 0.703866 |
| Suriname | 2019 | 0.874242 | 0.715426 |
| Sweden   | 1990 | 0.754326 | 0.463779 |

|        |      |          |          |
|--------|------|----------|----------|
| Sweden | 1991 | 0.743543 | 0.454427 |
| Sweden | 1992 | 0.750763 | 0.455035 |
| Sweden | 1993 | 0.739427 | 0.445076 |
| Sweden | 1994 | 0.745978 | 0.44729  |
| Sweden | 1995 | 0.748424 | 0.448184 |
| Sweden | 1996 | 0.781246 | 0.465371 |
| Sweden | 1997 | 0.792434 | 0.470712 |
| Sweden | 1998 | 0.797746 | 0.471452 |
| Sweden | 1999 | 0.810983 | 0.477167 |
| Sweden | 2000 | 0.846597 | 0.497609 |
| Sweden | 2001 | 0.846216 | 0.497371 |
| Sweden | 2002 | 0.854622 | 0.502943 |
| Sweden | 2003 | 0.852701 | 0.503031 |
| Sweden | 2004 | 0.849916 | 0.501095 |
| Sweden | 2005 | 0.861536 | 0.509177 |
| Sweden | 2006 | 0.895253 | 0.529417 |
| Sweden | 2007 | 0.912485 | 0.538504 |
| Sweden | 2008 | 0.914439 | 0.542118 |
| Sweden | 2009 | 0.913988 | 0.54386  |
| Sweden | 2010 | 0.939152 | 0.560356 |
| Sweden | 2011 | 0.944867 | 0.567629 |
| Sweden | 2012 | 0.948257 | 0.574409 |
| Sweden | 2013 | 0.960872 | 0.587228 |
| Sweden | 2014 | 0.971413 | 0.598792 |
| Sweden | 2015 | 0.963536 | 0.59731  |



|             |      |          |          |
|-------------|------|----------|----------|
| Sweden      | 2016 | 0.968405 | 0.604055 |
| Sweden      | 2017 | 0.963346 | 0.608837 |
| Sweden      | 2018 | 0.949485 | 0.613392 |
| Sweden      | 2019 | 0.9058   | 0.598532 |
| Switzerland | 1990 | 1.062104 | 0.561863 |
| Switzerland | 1991 | 1.085297 | 0.574003 |
| Switzerland | 1992 | 1.118409 | 0.592365 |
| Switzerland | 1993 | 1.151731 | 0.609078 |
| Switzerland | 1994 | 1.192699 | 0.630941 |
| Switzerland | 1995 | 1.214237 | 0.642122 |
| Switzerland | 1996 | 1.241375 | 0.653118 |
| Switzerland | 1997 | 1.258971 | 0.662246 |
| Switzerland | 1998 | 1.265703 | 0.664328 |
| Switzerland | 1999 | 1.290294 | 0.675357 |
| Switzerland | 2000 | 1.342631 | 0.69972  |
| Switzerland | 2001 | 1.37058  | 0.709901 |
| Switzerland | 2002 | 1.38254  | 0.715449 |
| Switzerland | 2003 | 1.407761 | 0.727    |
| Switzerland | 2004 | 1.433706 | 0.740367 |
| Switzerland | 2005 | 1.469206 | 0.757813 |
| Switzerland | 2006 | 1.471483 | 0.759842 |
| Switzerland | 2007 | 1.473616 | 0.761116 |
| Switzerland | 2008 | 1.497778 | 0.778024 |
| Switzerland | 2009 | 1.497785 | 0.78351  |
| Switzerland | 2010 | 1.481958 | 0.781891 |

|                      |      |          |          |
|----------------------|------|----------|----------|
| Switzerland          | 2011 | 1.467667 | 0.77742  |
| Switzerland          | 2012 | 1.488953 | 0.789545 |
| Switzerland          | 2013 | 1.487406 | 0.790652 |
| Switzerland          | 2014 | 1.488658 | 0.792981 |
| Switzerland          | 2015 | 1.465689 | 0.780309 |
| Switzerland          | 2016 | 1.478698 | 0.796645 |
| Switzerland          | 2017 | 1.447048 | 0.795428 |
| Switzerland          | 2018 | 1.438361 | 0.801749 |
| Switzerland          | 2019 | 1.413788 | 0.800998 |
| Syrian Arab Republic | 1990 | 0.917479 | 1.018136 |
| Syrian Arab Republic | 1991 | 0.91471  | 1.035383 |
| Syrian Arab Republic | 1992 | 0.91309  | 1.052004 |
| Syrian Arab Republic | 1993 | 0.888644 | 1.046973 |
| Syrian Arab Republic | 1994 | 0.905732 | 1.091777 |
| Syrian Arab Republic | 1995 | 0.9339   | 1.155488 |
| Syrian Arab Republic | 1996 | 0.935203 | 1.179075 |
| Syrian Arab Republic | 1997 | 0.926363 | 1.188127 |
| Syrian Arab Republic | 1998 | 0.940655 | 1.218168 |
| Syrian Arab Republic | 1999 | 0.924891 | 1.217608 |
| Syrian Arab Republic | 2000 | 0.917348 | 1.226316 |
| Syrian Arab Republic | 2001 | 0.901886 | 1.202629 |
| Syrian Arab Republic | 2002 | 0.891482 | 1.176015 |
| Syrian Arab Republic | 2003 | 0.877832 | 1.168175 |
| Syrian Arab Republic | 2004 | 0.894141 | 1.205428 |
| Syrian Arab Republic | 2005 | 0.891503 | 1.221358 |

|    |                            |      |          |          |
|----|----------------------------|------|----------|----------|
| 1  |                            |      |          |          |
| 2  |                            |      |          |          |
| 3  |                            |      |          |          |
| 4  |                            |      |          |          |
| 5  | Syrian Arab Republic       | 2006 | 0.89491  | 1.244382 |
| 6  | Syrian Arab Republic       | 2007 | 0.875609 | 1.230146 |
| 7  | Syrian Arab Republic       | 2008 | 0.854031 | 1.180682 |
| 8  | Syrian Arab Republic       | 2009 | 0.870141 | 1.206509 |
| 9  | Syrian Arab Republic       | 2010 | 0.909359 | 1.261294 |
| 10 | Syrian Arab Republic       | 2011 | 0.9272   | 1.277259 |
| 11 | Syrian Arab Republic       | 2012 | 0.939035 | 1.265399 |
| 12 | Syrian Arab Republic       | 2013 | 0.958657 | 1.276741 |
| 13 | Syrian Arab Republic       | 2014 | 0.975687 | 1.28192  |
| 14 | Syrian Arab Republic       | 2015 | 0.986622 | 1.266201 |
| 15 | Syrian Arab Republic       | 2016 | 0.993034 | 1.255924 |
| 16 | Syrian Arab Republic       | 2017 | 0.998276 | 1.248525 |
| 17 | Syrian Arab Republic       | 2018 | 1.004023 | 1.245232 |
| 18 | Syrian Arab Republic       | 2019 | 1.005204 | 1.238992 |
| 19 | Taiwan (Province of China) | 1990 | 0.985425 | 1.011569 |
| 20 | Taiwan (Province of China) | 1991 | 0.995354 | 1.029026 |
| 21 | Taiwan (Province of China) | 1992 | 0.985887 | 1.02406  |
| 22 | Taiwan (Province of China) | 1993 | 0.989273 | 1.033343 |
| 23 | Taiwan (Province of China) | 1994 | 0.954842 | 1.005088 |
| 24 | Taiwan (Province of China) | 1995 | 0.961873 | 1.010782 |
| 25 | Taiwan (Province of China) | 1996 | 0.968368 | 1.020645 |
| 26 | Taiwan (Province of China) | 1997 | 0.964296 | 1.015286 |
| 27 | Taiwan (Province of China) | 1998 | 0.979169 | 1.027264 |
| 28 | Taiwan (Province of China) | 1999 | 1.002197 | 1.050918 |
| 29 | Taiwan (Province of China) | 2000 | 1.009383 | 1.056412 |
| 30 |                            |      |          |          |
| 31 |                            |      |          |          |
| 32 |                            |      |          |          |
| 33 |                            |      |          |          |
| 34 |                            |      |          |          |
| 35 |                            |      |          |          |
| 36 |                            |      |          |          |
| 37 |                            |      |          |          |
| 38 |                            |      |          |          |
| 39 |                            |      |          |          |
| 40 |                            |      |          |          |
| 41 |                            |      |          |          |
| 42 |                            |      |          |          |
| 43 |                            |      |          |          |
| 44 |                            |      |          |          |
| 45 |                            |      |          |          |
| 46 |                            |      |          |          |

|                            |      |          |          |
|----------------------------|------|----------|----------|
| Taiwan (Province of China) | 2001 | 1.009354 | 1.054034 |
| Taiwan (Province of China) | 2002 | 1.006938 | 1.043543 |
| Taiwan (Province of China) | 2003 | 1.017283 | 1.046037 |
| Taiwan (Province of China) | 2004 | 0.985298 | 1.009895 |
| Taiwan (Province of China) | 2005 | 0.980931 | 0.996768 |
| Taiwan (Province of China) | 2006 | 0.960976 | 0.966534 |
| Taiwan (Province of China) | 2007 | 0.981744 | 0.975252 |
| Taiwan (Province of China) | 2008 | 0.983518 | 0.965808 |
| Taiwan (Province of China) | 2009 | 0.999055 | 0.974124 |
| Taiwan (Province of China) | 2010 | 1.015987 | 0.975085 |
| Taiwan (Province of China) | 2011 | 0.98816  | 0.932321 |
| Taiwan (Province of China) | 2012 | 1.011285 | 0.935788 |
| Taiwan (Province of China) | 2013 | 1.014673 | 0.921141 |
| Taiwan (Province of China) | 2014 | 1.017774 | 0.913073 |
| Taiwan (Province of China) | 2015 | 1.017308 | 0.894752 |
| Taiwan (Province of China) | 2016 | 1.028637 | 0.885786 |
| Taiwan (Province of China) | 2017 | 1.049592 | 0.8845   |
| Taiwan (Province of China) | 2018 | 1.075771 | 0.889571 |
| Taiwan (Province of China) | 2019 | 1.085295 | 0.890293 |
| Tajikistan                 | 1990 | 1.073056 | 0.767723 |
| Tajikistan                 | 1991 | 1.087627 | 0.781103 |
| Tajikistan                 | 1992 | 1.074775 | 0.788456 |
| Tajikistan                 | 1993 | 1.104223 | 0.815629 |
| Tajikistan                 | 1994 | 1.111487 | 0.817704 |
| Tajikistan                 | 1995 | 1.082798 | 0.781517 |

|            |      |          |          |
|------------|------|----------|----------|
| Tajikistan | 1996 | 0.997321 | 0.703395 |
| Tajikistan | 1997 | 1.021929 | 0.708641 |
| Tajikistan | 1998 | 1.09509  | 0.757133 |
| Tajikistan | 1999 | 1.097986 | 0.769817 |
| Tajikistan | 2000 | 1.075764 | 0.773095 |
| Tajikistan | 2001 | 1.058164 | 0.766786 |
| Tajikistan | 2002 | 0.994554 | 0.740537 |
| Tajikistan | 2003 | 0.967197 | 0.738701 |
| Tajikistan | 2004 | 0.958714 | 0.745795 |
| Tajikistan | 2005 | 0.927086 | 0.725698 |
| Tajikistan | 2006 | 0.886752 | 0.692502 |
| Tajikistan | 2007 | 0.862094 | 0.673144 |
| Tajikistan | 2008 | 0.850079 | 0.661517 |
| Tajikistan | 2009 | 0.847407 | 0.659561 |
| Tajikistan | 2010 | 0.845459 | 0.657416 |
| Tajikistan | 2011 | 0.850017 | 0.665894 |
| Tajikistan | 2012 | 0.844328 | 0.666285 |
| Tajikistan | 2013 | 0.828206 | 0.64234  |
| Tajikistan | 2014 | 0.821117 | 0.634306 |
| Tajikistan | 2015 | 0.821088 | 0.630952 |
| Tajikistan | 2016 | 0.82218  | 0.628012 |
| Tajikistan | 2017 | 0.840047 | 0.6362   |
| Tajikistan | 2018 | 0.858145 | 0.653595 |
| Tajikistan | 2019 | 0.86892  | 0.663584 |
| Thailand   | 1990 | 0.681059 | 0.588169 |

|    |          |      |          |          |
|----|----------|------|----------|----------|
| 1  |          |      |          |          |
| 2  |          |      |          |          |
| 3  |          |      |          |          |
| 4  |          |      |          |          |
| 5  | Thailand | 1991 | 0.680018 | 0.593022 |
| 6  | Thailand | 1992 | 0.670693 | 0.590228 |
| 7  | Thailand | 1993 | 0.657486 | 0.586194 |
| 8  | Thailand | 1994 | 0.642782 | 0.582624 |
| 9  | Thailand | 1995 | 0.629929 | 0.578302 |
| 10 | Thailand | 1996 | 0.647371 | 0.596895 |
| 11 | Thailand | 1997 | 0.687893 | 0.630446 |
| 12 | Thailand | 1998 | 0.706685 | 0.61792  |
| 13 | Thailand | 1999 | 0.762966 | 0.658819 |
| 14 | Thailand | 2000 | 0.841298 | 0.719716 |
| 15 | Thailand | 2001 | 0.932113 | 0.799463 |
| 16 | Thailand | 2002 | 1.033857 | 0.882983 |
| 17 | Thailand | 2003 | 1.098239 | 0.934802 |
| 18 | Thailand | 2004 | 1.172291 | 0.993394 |
| 19 | Thailand | 2005 | 1.228727 | 1.038246 |
| 20 | Thailand | 2006 | 1.247513 | 1.050587 |
| 21 | Thailand | 2007 | 1.266169 | 1.065646 |
| 22 | Thailand | 2008 | 1.276799 | 1.071992 |
| 23 | Thailand | 2009 | 1.271683 | 1.063155 |
| 24 | Thailand | 2010 | 1.270152 | 1.059761 |
| 25 | Thailand | 2011 | 1.247955 | 1.040133 |
| 26 | Thailand | 2012 | 1.227875 | 1.01986  |
| 27 | Thailand | 2013 | 1.211694 | 1.00092  |
| 28 | Thailand | 2014 | 1.194524 | 0.980393 |
| 29 | Thailand | 2015 | 1.165776 | 0.949129 |
| 30 |          |      |          |          |
| 31 |          |      |          |          |
| 32 |          |      |          |          |
| 33 |          |      |          |          |
| 34 |          |      |          |          |
| 35 |          |      |          |          |
| 36 |          |      |          |          |
| 37 |          |      |          |          |
| 38 |          |      |          |          |
| 39 |          |      |          |          |
| 40 |          |      |          |          |
| 41 |          |      |          |          |
| 42 |          |      |          |          |
| 43 |          |      |          |          |
| 44 |          |      |          |          |
| 45 |          |      |          |          |
| 46 |          |      |          |          |

|    |             |      |          |          |
|----|-------------|------|----------|----------|
| 1  |             |      |          |          |
| 2  |             |      |          |          |
| 3  |             |      |          |          |
| 4  |             |      |          |          |
| 5  | Thailand    | 2016 | 1.156813 | 0.934726 |
| 6  | Thailand    | 2017 | 1.164108 | 0.932472 |
| 7  | Thailand    | 2018 | 1.183666 | 0.940038 |
| 8  | Thailand    | 2019 | 1.203826 | 0.949717 |
| 9  | Timor-Leste | 1990 | 1.196681 | 1.155464 |
| 10 | Timor-Leste | 1991 | 1.183547 | 1.14905  |
| 11 | Timor-Leste | 1992 | 1.181926 | 1.153336 |
| 12 | Timor-Leste | 1993 | 1.18303  | 1.159541 |
| 13 | Timor-Leste | 1994 | 1.182152 | 1.16208  |
| 14 | Timor-Leste | 1995 | 1.180636 | 1.156541 |
| 15 | Timor-Leste | 1996 | 1.170038 | 1.148286 |
| 16 | Timor-Leste | 1997 | 1.164627 | 1.146855 |
| 17 | Timor-Leste | 1998 | 1.154785 | 1.144469 |
| 18 | Timor-Leste | 1999 | 1.124982 | 1.120679 |
| 19 | Timor-Leste | 2000 | 1.09484  | 1.088144 |
| 20 | Timor-Leste | 2001 | 1.068454 | 1.065474 |
| 21 | Timor-Leste | 2002 | 1.044813 | 1.045044 |
| 22 | Timor-Leste | 2003 | 1.021296 | 1.023366 |
| 23 | Timor-Leste | 2004 | 1.004261 | 1.007189 |
| 24 | Timor-Leste | 2005 | 0.995047 | 0.99295  |
| 25 | Timor-Leste | 2006 | 0.983217 | 0.979306 |
| 26 | Timor-Leste | 2007 | 0.97809  | 0.972303 |
| 27 | Timor-Leste | 2008 | 0.972901 | 0.96515  |
| 28 | Timor-Leste | 2009 | 0.958798 | 0.950179 |
| 29 | Timor-Leste | 2010 | 0.946263 | 0.931787 |
| 30 |             |      |          |          |
| 31 |             |      |          |          |
| 32 |             |      |          |          |
| 33 |             |      |          |          |
| 34 |             |      |          |          |
| 35 |             |      |          |          |
| 36 |             |      |          |          |
| 37 |             |      |          |          |
| 38 |             |      |          |          |
| 39 |             |      |          |          |
| 40 |             |      |          |          |
| 41 |             |      |          |          |
| 42 |             |      |          |          |
| 43 |             |      |          |          |
| 44 |             |      |          |          |
| 45 |             |      |          |          |
| 46 |             |      |          |          |

|             |      |          |          |
|-------------|------|----------|----------|
| Timor-Leste | 2011 | 0.944849 | 0.929167 |
| Timor-Leste | 2012 | 0.937733 | 0.922057 |
| Timor-Leste | 2013 | 0.933499 | 0.917589 |
| Timor-Leste | 2014 | 0.93137  | 0.915053 |
| Timor-Leste | 2015 | 0.931167 | 0.907643 |
| Timor-Leste | 2016 | 0.928885 | 0.902893 |
| Timor-Leste | 2017 | 0.923472 | 0.896569 |
| Timor-Leste | 2018 | 0.919177 | 0.891868 |
| Timor-Leste | 2019 | 0.914942 | 0.887747 |
| Togo        | 1990 | 0.962346 | 0.830838 |
| Togo        | 1991 | 0.950342 | 0.818605 |
| Togo        | 1992 | 0.930765 | 0.801384 |
| Togo        | 1993 | 0.906439 | 0.7784   |
| Togo        | 1994 | 0.88443  | 0.755182 |
| Togo        | 1995 | 0.860386 | 0.73047  |
| Togo        | 1996 | 0.836479 | 0.708339 |
| Togo        | 1997 | 0.828206 | 0.695167 |
| Togo        | 1998 | 0.809561 | 0.674108 |
| Togo        | 1999 | 0.790023 | 0.656131 |
| Togo        | 2000 | 0.780961 | 0.645704 |
| Togo        | 2001 | 0.770827 | 0.6343   |
| Togo        | 2002 | 0.774135 | 0.631214 |
| Togo        | 2003 | 0.770561 | 0.623609 |
| Togo        | 2004 | 0.764903 | 0.614684 |
| Togo        | 2005 | 0.761828 | 0.607812 |



|         |      |          |          |
|---------|------|----------|----------|
| Togo    | 2006 | 0.761196 | 0.602424 |
| Togo    | 2007 | 0.771884 | 0.603577 |
| Togo    | 2008 | 0.773679 | 0.597014 |
| Togo    | 2009 | 0.777731 | 0.597059 |
| Togo    | 2010 | 0.780742 | 0.597078 |
| Togo    | 2011 | 0.791777 | 0.600911 |
| Togo    | 2012 | 0.807868 | 0.605235 |
| Togo    | 2013 | 0.817276 | 0.606995 |
| Togo    | 2014 | 0.824303 | 0.612965 |
| Togo    | 2015 | 0.831794 | 0.618577 |
| Togo    | 2016 | 0.842748 | 0.627372 |
| Togo    | 2017 | 0.857032 | 0.634987 |
| Togo    | 2018 | 0.871302 | 0.642024 |
| Togo    | 2019 | 0.880134 | 0.6488   |
| Tokelau | 1990 | 1.654136 | 1.365381 |
| Tokelau | 1991 | 1.642666 | 1.35864  |
| Tokelau | 1992 | 1.620669 | 1.35639  |
| Tokelau | 1993 | 1.593963 | 1.351673 |
| Tokelau | 1994 | 1.576672 | 1.351523 |
| Tokelau | 1995 | 1.567959 | 1.352706 |
| Tokelau | 1996 | 1.573466 | 1.356843 |
| Tokelau | 1997 | 1.591125 | 1.360109 |
| Tokelau | 1998 | 1.621783 | 1.361206 |
| Tokelau | 1999 | 1.651438 | 1.353628 |
| Tokelau | 2000 | 1.677927 | 1.343664 |

|         |      |          |          |
|---------|------|----------|----------|
| Tokelau | 2001 | 1.68679  | 1.32952  |
| Tokelau | 2002 | 1.678846 | 1.323954 |
| Tokelau | 2003 | 1.646445 | 1.313106 |
| Tokelau | 2004 | 1.619364 | 1.314728 |
| Tokelau | 2005 | 1.551954 | 1.285902 |
| Tokelau | 2006 | 1.493012 | 1.260807 |
| Tokelau | 2007 | 1.434987 | 1.228593 |
| Tokelau | 2008 | 1.397422 | 1.202485 |
| Tokelau | 2009 | 1.37992  | 1.185755 |
| Tokelau | 2010 | 1.373876 | 1.178019 |
| Tokelau | 2011 | 1.361942 | 1.171336 |
| Tokelau | 2012 | 1.345399 | 1.168842 |
| Tokelau | 2013 | 1.328842 | 1.169288 |
| Tokelau | 2014 | 1.305957 | 1.165686 |
| Tokelau | 2015 | 1.28582  | 1.16589  |
| Tokelau | 2016 | 1.265894 | 1.168574 |
| Tokelau | 2017 | 1.255581 | 1.18055  |
| Tokelau | 2018 | 1.248531 | 1.189306 |
| Tokelau | 2019 | 1.245695 | 1.197551 |
| Tonga   | 1990 | 1.137947 | 0.954422 |
| Tonga   | 1991 | 1.150946 | 0.963223 |
| Tonga   | 1992 | 1.153805 | 0.956807 |
| Tonga   | 1993 | 1.175571 | 0.972467 |
| Tonga   | 1994 | 1.198633 | 0.991896 |
| Tonga   | 1995 | 1.222674 | 1.012158 |

1  
2  
3  
4  
5  
6  
7  
8  
9  
10  
11  
12  
13  
14  
15  
16  
17  
18  
19  
20  
21  
22  
23  
24  
25  
26  
27  
28  
29  
30  
31  
32  
33  
34  
35  
36  
37  
38  
39  
40  
41  
42  
43  
44  
45  
46

|                     |      |          |          |
|---------------------|------|----------|----------|
| Tonga               | 1996 | 1.214661 | 1.004611 |
| Tonga               | 1997 | 1.215995 | 1.005481 |
| Tonga               | 1998 | 1.184864 | 0.982384 |
| Tonga               | 1999 | 1.116171 | 0.924504 |
| Tonga               | 2000 | 1.092365 | 0.89794  |
| Tonga               | 2001 | 1.072194 | 0.876573 |
| Tonga               | 2002 | 1.025257 | 0.834568 |
| Tonga               | 2003 | 0.987728 | 0.798999 |
| Tonga               | 2004 | 0.996284 | 0.801134 |
| Tonga               | 2005 | 1.010378 | 0.812375 |
| Tonga               | 2006 | 0.959076 | 0.770036 |
| Tonga               | 2007 | 0.91288  | 0.731886 |
| Tonga               | 2008 | 0.87431  | 0.699518 |
| Tonga               | 2009 | 0.844102 | 0.673292 |
| Tonga               | 2010 | 0.824036 | 0.655058 |
| Tonga               | 2011 | 0.811065 | 0.642886 |
| Tonga               | 2012 | 0.803065 | 0.634647 |
| Tonga               | 2013 | 0.79368  | 0.625524 |
| Tonga               | 2014 | 0.789094 | 0.620129 |
| Tonga               | 2015 | 0.790241 | 0.619271 |
| Tonga               | 2016 | 0.79346  | 0.620084 |
| Tonga               | 2017 | 0.803721 | 0.626275 |
| Tonga               | 2018 | 0.811761 | 0.630899 |
| Tonga               | 2019 | 0.819439 | 0.635363 |
| Trinidad and Tobago | 1990 | 0.600964 | 0.489801 |

|                     |      |          |          |
|---------------------|------|----------|----------|
| Trinidad and Tobago | 1991 | 0.627662 | 0.515626 |
| Trinidad and Tobago | 1992 | 0.606567 | 0.504513 |
| Trinidad and Tobago | 1993 | 0.64273  | 0.535968 |
| Trinidad and Tobago | 1994 | 0.643704 | 0.538284 |
| Trinidad and Tobago | 1995 | 0.699835 | 0.588405 |
| Trinidad and Tobago | 1996 | 0.630826 | 0.534858 |
| Trinidad and Tobago | 1997 | 0.670581 | 0.56774  |
| Trinidad and Tobago | 1998 | 0.668419 | 0.570753 |
| Trinidad and Tobago | 1999 | 0.693004 | 0.596655 |
| Trinidad and Tobago | 2000 | 0.721773 | 0.621557 |
| Trinidad and Tobago | 2001 | 0.707633 | 0.612719 |
| Trinidad and Tobago | 2002 | 0.708067 | 0.617553 |
| Trinidad and Tobago | 2003 | 0.702159 | 0.617369 |
| Trinidad and Tobago | 2004 | 0.719421 | 0.631428 |
| Trinidad and Tobago | 2005 | 0.697426 | 0.612803 |
| Trinidad and Tobago | 2006 | 0.752942 | 0.660694 |
| Trinidad and Tobago | 2007 | 0.769876 | 0.675302 |
| Trinidad and Tobago | 2008 | 0.726015 | 0.637953 |
| Trinidad and Tobago | 2009 | 0.751312 | 0.6574   |
| Trinidad and Tobago | 2010 | 0.747563 | 0.654669 |
| Trinidad and Tobago | 2011 | 0.748961 | 0.657407 |
| Trinidad and Tobago | 2012 | 0.758825 | 0.666719 |
| Trinidad and Tobago | 2013 | 0.75465  | 0.661016 |
| Trinidad and Tobago | 2014 | 0.74257  | 0.650544 |
| Trinidad and Tobago | 2015 | 0.728443 | 0.637884 |

|                     |      |          |          |
|---------------------|------|----------|----------|
| Trinidad and Tobago | 2016 | 0.714285 | 0.622822 |
| Trinidad and Tobago | 2017 | 0.708588 | 0.617215 |
| Trinidad and Tobago | 2018 | 0.705777 | 0.614191 |
| Trinidad and Tobago | 2019 | 0.700642 | 0.609275 |
| Tunisia             | 1990 | 0.922362 | 0.92216  |
| Tunisia             | 1991 | 0.91466  | 0.908992 |
| Tunisia             | 1992 | 0.909486 | 0.907232 |
| Tunisia             | 1993 | 0.893286 | 0.890379 |
| Tunisia             | 1994 | 0.889422 | 0.885243 |
| Tunisia             | 1995 | 0.915137 | 0.907174 |
| Tunisia             | 1996 | 0.915833 | 0.904284 |
| Tunisia             | 1997 | 0.911858 | 0.905111 |
| Tunisia             | 1998 | 0.906945 | 0.898084 |
| Tunisia             | 1999 | 0.902886 | 0.889968 |
| Tunisia             | 2000 | 0.895207 | 0.874845 |
| Tunisia             | 2001 | 0.896714 | 0.870498 |
| Tunisia             | 2002 | 0.901627 | 0.869276 |
| Tunisia             | 2003 | 0.896903 | 0.853638 |
| Tunisia             | 2004 | 0.907776 | 0.856652 |
| Tunisia             | 2005 | 0.920709 | 0.861737 |
| Tunisia             | 2006 | 0.929556 | 0.86298  |
| Tunisia             | 2007 | 0.942838 | 0.870231 |
| Tunisia             | 2008 | 0.955568 | 0.877671 |
| Tunisia             | 2009 | 0.960409 | 0.877045 |
| Tunisia             | 2010 | 0.968509 | 0.879379 |

|         |      |          |          |
|---------|------|----------|----------|
| Tunisia | 2011 | 0.982912 | 0.888732 |
| Tunisia | 2012 | 0.990537 | 0.890952 |
| Tunisia | 2013 | 1.002731 | 0.897425 |
| Tunisia | 2014 | 1.014181 | 0.903306 |
| Tunisia | 2015 | 1.026315 | 0.91006  |
| Tunisia | 2016 | 1.03649  | 0.914533 |
| Tunisia | 2017 | 1.04578  | 0.918231 |
| Tunisia | 2018 | 1.05692  | 0.925188 |
| Tunisia | 2019 | 1.070279 | 0.935564 |
| Turkey  | 1990 | 0.882338 | 0.747628 |
| Turkey  | 1991 | 0.923351 | 0.791123 |
| Turkey  | 1992 | 0.923977 | 0.795548 |
| Turkey  | 1993 | 0.926172 | 0.800107 |
| Turkey  | 1994 | 0.950114 | 0.827933 |
| Turkey  | 1995 | 0.9474   | 0.825339 |
| Turkey  | 1996 | 0.922129 | 0.799142 |
| Turkey  | 1997 | 0.877222 | 0.74673  |
| Turkey  | 1998 | 0.865027 | 0.727694 |
| Turkey  | 1999 | 0.904444 | 0.768061 |
| Turkey  | 2000 | 0.915587 | 0.780539 |
| Turkey  | 2001 | 0.842519 | 0.690307 |
| Turkey  | 2002 | 0.776753 | 0.607787 |
| Turkey  | 2003 | 0.77808  | 0.597431 |
| Turkey  | 2004 | 0.785448 | 0.592462 |
| Turkey  | 2005 | 0.826471 | 0.620965 |

|              |      |          |          |
|--------------|------|----------|----------|
| Turkey       | 2006 | 0.899691 | 0.676278 |
| Turkey       | 2007 | 0.989343 | 0.75242  |
| Turkey       | 2008 | 1.072288 | 0.831128 |
| Turkey       | 2009 | 1.07198  | 0.851161 |
| Turkey       | 2010 | 1.058503 | 0.849826 |
| Turkey       | 2011 | 1.045949 | 0.845235 |
| Turkey       | 2012 | 1.043623 | 0.847286 |
| Turkey       | 2013 | 1.048438 | 0.855723 |
| Turkey       | 2014 | 1.041235 | 0.848401 |
| Turkey       | 2015 | 1.054692 | 0.857405 |
| Turkey       | 2016 | 1.081499 | 0.880422 |
| Turkey       | 2017 | 1.101105 | 0.900345 |
| Turkey       | 2018 | 1.116604 | 0.915779 |
| Turkey       | 2019 | 1.122    | 0.920632 |
| Turkmenistan | 1990 | 1.024385 | 0.767814 |
| Turkmenistan | 1991 | 1.045253 | 0.777121 |
| Turkmenistan | 1992 | 1.073674 | 0.808289 |
| Turkmenistan | 1993 | 1.021469 | 0.770932 |
| Turkmenistan | 1994 | 0.985844 | 0.746882 |
| Turkmenistan | 1995 | 0.97205  | 0.741217 |
| Turkmenistan | 1996 | 0.92706  | 0.713066 |
| Turkmenistan | 1997 | 0.900121 | 0.699398 |
| Turkmenistan | 1998 | 0.849848 | 0.6639   |
| Turkmenistan | 1999 | 0.840053 | 0.656002 |
| Turkmenistan | 2000 | 0.836794 | 0.655332 |

|              |      |          |          |
|--------------|------|----------|----------|
| Turkmenistan | 2001 | 0.85116  | 0.669704 |
| Turkmenistan | 2002 | 0.841139 | 0.66648  |
| Turkmenistan | 2003 | 0.803498 | 0.640381 |
| Turkmenistan | 2004 | 0.779975 | 0.625078 |
| Turkmenistan | 2005 | 0.77615  | 0.626214 |
| Turkmenistan | 2006 | 0.78764  | 0.638138 |
| Turkmenistan | 2007 | 0.762627 | 0.622647 |
| Turkmenistan | 2008 | 0.768426 | 0.627439 |
| Turkmenistan | 2009 | 0.78346  | 0.63939  |
| Turkmenistan | 2010 | 0.784212 | 0.642602 |
| Turkmenistan | 2011 | 0.800166 | 0.659001 |
| Turkmenistan | 2012 | 0.804281 | 0.665747 |
| Turkmenistan | 2013 | 0.75502  | 0.629872 |
| Turkmenistan | 2014 | 0.730527 | 0.612734 |
| Turkmenistan | 2015 | 0.700143 | 0.590465 |
| Turkmenistan | 2016 | 0.706254 | 0.596266 |
| Turkmenistan | 2017 | 0.704075 | 0.595532 |
| Turkmenistan | 2018 | 0.696381 | 0.58806  |
| Turkmenistan | 2019 | 0.694862 | 0.587712 |
| Tuvalu       | 1990 | 1.28414  | 0.882899 |
| Tuvalu       | 1991 | 1.271231 | 0.881089 |
| Tuvalu       | 1992 | 1.266315 | 0.883443 |
| Tuvalu       | 1993 | 1.277371 | 0.895488 |
| Tuvalu       | 1994 | 1.270392 | 0.895911 |
| Tuvalu       | 1995 | 1.282723 | 0.910113 |



1  
2  
3  
4  
5  
6  
7  
8  
9  
10  
11  
12  
13  
14  
15  
16  
17  
18  
19  
20  
21  
22  
23  
24  
25  
26  
27  
28  
29  
30  
31  
32  
33  
34  
35  
36  
37  
38  
39  
40  
41  
42  
43  
44  
45  
46

|        |      |          |          |
|--------|------|----------|----------|
| Tuvalu | 1996 | 1.28478  | 0.918413 |
| Tuvalu | 1997 | 1.283959 | 0.924284 |
| Tuvalu | 1998 | 1.26629  | 0.918439 |
| Tuvalu | 1999 | 1.265058 | 0.923673 |
| Tuvalu | 2000 | 1.27034  | 0.933788 |
| Tuvalu | 2001 | 1.248973 | 0.927207 |
| Tuvalu | 2002 | 1.230434 | 0.923587 |
| Tuvalu | 2003 | 1.209399 | 0.917821 |
| Tuvalu | 2004 | 1.19759  | 0.918897 |
| Tuvalu | 2005 | 1.160623 | 0.900505 |
| Tuvalu | 2006 | 1.128669 | 0.885957 |
| Tuvalu | 2007 | 1.088976 | 0.86284  |
| Tuvalu | 2008 | 1.055329 | 0.843309 |
| Tuvalu | 2009 | 1.029277 | 0.829027 |
| Tuvalu | 2010 | 1.0103   | 0.819353 |
| Tuvalu | 2011 | 0.990434 | 0.809332 |
| Tuvalu | 2012 | 0.972895 | 0.800738 |
| Tuvalu | 2013 | 0.958254 | 0.793897 |
| Tuvalu | 2014 | 0.943162 | 0.785966 |
| Tuvalu | 2015 | 0.932401 | 0.780965 |
| Tuvalu | 2016 | 0.922036 | 0.777291 |
| Tuvalu | 2017 | 0.917452 | 0.777446 |
| Tuvalu | 2018 | 0.911409 | 0.776202 |
| Tuvalu | 2019 | 0.904083 | 0.774402 |
| Uganda | 1990 | 0.548236 | 0.504404 |

|        |      |          |          |
|--------|------|----------|----------|
| Uganda | 1991 | 0.54013  | 0.490464 |
| Uganda | 1992 | 0.536199 | 0.480626 |
| Uganda | 1993 | 0.535278 | 0.47393  |
| Uganda | 1994 | 0.53796  | 0.471558 |
| Uganda | 1995 | 0.539955 | 0.468542 |
| Uganda | 1996 | 0.54526  | 0.469057 |
| Uganda | 1997 | 0.557288 | 0.474044 |
| Uganda | 1998 | 0.574814 | 0.482678 |
| Uganda | 1999 | 0.592851 | 0.492126 |
| Uganda | 2000 | 0.61163  | 0.502468 |
| Uganda | 2001 | 0.625378 | 0.50938  |
| Uganda | 2002 | 0.635621 | 0.514315 |
| Uganda | 2003 | 0.640481 | 0.516736 |
| Uganda | 2004 | 0.646589 | 0.518975 |
| Uganda | 2005 | 0.650511 | 0.520499 |
| Uganda | 2006 | 0.647978 | 0.517671 |
| Uganda | 2007 | 0.639278 | 0.511191 |
| Uganda | 2008 | 0.630149 | 0.504185 |
| Uganda | 2009 | 0.628857 | 0.503771 |
| Uganda | 2010 | 0.634139 | 0.506062 |
| Uganda | 2011 | 0.637465 | 0.508293 |
| Uganda | 2012 | 0.645277 | 0.514361 |
| Uganda | 2013 | 0.659301 | 0.522239 |
| Uganda | 2014 | 0.668866 | 0.527592 |
| Uganda | 2015 | 0.675581 | 0.531943 |

1  
2  
3  
4  
5  
6  
7  
8  
9  
10  
11  
12  
13  
14  
15  
16  
17  
18  
19  
20  
21  
22  
23  
24  
25  
26  
27  
28  
29  
30  
31  
32  
33  
34  
35  
36  
37  
38  
39  
40  
41  
42  
43  
44  
45  
46

|         |      |          |          |
|---------|------|----------|----------|
| Uganda  | 2016 | 0.680967 | 0.534655 |
| Uganda  | 2017 | 0.68842  | 0.542143 |
| Uganda  | 2018 | 0.697821 | 0.550123 |
| Uganda  | 2019 | 0.70498  | 0.556486 |
| Ukraine | 1990 | 1.26884  | 0.535379 |
| Ukraine | 1991 | 1.265186 | 0.53084  |
| Ukraine | 1992 | 1.259455 | 0.527745 |
| Ukraine | 1993 | 1.283322 | 0.535352 |
| Ukraine | 1994 | 1.266652 | 0.530396 |
| Ukraine | 1995 | 1.223648 | 0.518507 |
| Ukraine | 1996 | 1.228618 | 0.517985 |
| Ukraine | 1997 | 1.257429 | 0.526083 |
| Ukraine | 1998 | 1.284121 | 0.532463 |
| Ukraine | 1999 | 1.261957 | 0.528379 |
| Ukraine | 2000 | 1.222739 | 0.518315 |
| Ukraine | 2001 | 1.218068 | 0.524698 |
| Ukraine | 2002 | 1.187573 | 0.52938  |
| Ukraine | 2003 | 1.17885  | 0.542352 |
| Ukraine | 2004 | 1.125673 | 0.539554 |
| Ukraine | 2005 | 1.059571 | 0.529521 |
| Ukraine | 2006 | 1.058946 | 0.534629 |
| Ukraine | 2007 | 1.027918 | 0.531838 |
| Ukraine | 2008 | 1.014702 | 0.529647 |
| Ukraine | 2009 | 1.082432 | 0.551625 |
| Ukraine | 2010 | 1.100984 | 0.556521 |

|                      |      |          |          |
|----------------------|------|----------|----------|
| Ukraine              | 2011 | 1.11073  | 0.562062 |
| Ukraine              | 2012 | 1.116488 | 0.569273 |
| Ukraine              | 2013 | 1.124589 | 0.579758 |
| Ukraine              | 2014 | 1.152312 | 0.594726 |
| Ukraine              | 2015 | 1.004352 | 0.550619 |
| Ukraine              | 2016 | 1.038161 | 0.568166 |
| Ukraine              | 2017 | 1.040673 | 0.563753 |
| Ukraine              | 2018 | 1.031214 | 0.550653 |
| Ukraine              | 2019 | 1.034153 | 0.548031 |
| United Arab Emirates | 1990 | 0.508775 | 1.055819 |
| United Arab Emirates | 1991 | 0.503032 | 1.069792 |
| United Arab Emirates | 1992 | 0.488118 | 1.067824 |
| United Arab Emirates | 1993 | 0.474784 | 1.069098 |
| United Arab Emirates | 1994 | 0.469924 | 1.103837 |
| United Arab Emirates | 1995 | 0.458375 | 1.106888 |
| United Arab Emirates | 1996 | 0.453324 | 1.114917 |
| United Arab Emirates | 1997 | 0.449076 | 1.143774 |
| United Arab Emirates | 1998 | 0.443761 | 1.145591 |
| United Arab Emirates | 1999 | 0.438082 | 1.140382 |
| United Arab Emirates | 2000 | 0.423761 | 1.063493 |
| United Arab Emirates | 2001 | 0.423709 | 1.065669 |
| United Arab Emirates | 2002 | 0.421871 | 1.066846 |
| United Arab Emirates | 2003 | 0.469095 | 1.226409 |
| United Arab Emirates | 2004 | 0.51104  | 1.461019 |
| United Arab Emirates | 2005 | 0.502397 | 1.530846 |

|    |                      |      |          |          |
|----|----------------------|------|----------|----------|
| 1  |                      |      |          |          |
| 2  |                      |      |          |          |
| 3  |                      |      |          |          |
| 4  |                      |      |          |          |
| 5  | United Arab Emirates | 2006 | 0.484336 | 1.642268 |
| 6  | United Arab Emirates | 2007 | 0.455707 | 1.872718 |
| 7  | United Arab Emirates | 2008 | 0.414353 | 1.915966 |
| 8  | United Arab Emirates | 2009 | 0.386944 | 1.959882 |
| 9  | United Arab Emirates | 2010 | 0.377203 | 1.975313 |
| 10 | United Arab Emirates | 2011 | 0.372044 | 2.007443 |
| 11 | United Arab Emirates | 2012 | 0.369703 | 2.035482 |
| 12 | United Arab Emirates | 2013 | 0.353789 | 1.824708 |
| 13 | United Arab Emirates | 2014 | 0.302003 | 1.068639 |
| 14 | United Arab Emirates | 2015 | 0.308823 | 1.083892 |
| 15 | United Arab Emirates | 2016 | 0.313736 | 1.095106 |
| 16 | United Arab Emirates | 2017 | 0.317355 | 1.102036 |
| 17 | United Arab Emirates | 2018 | 0.322685 | 1.113433 |
| 18 | United Arab Emirates | 2019 | 0.328024 | 1.123091 |
| 19 | United Arab Emirates | 2019 | 0.328024 | 1.123091 |
| 20 | United Arab Emirates | 2019 | 0.328024 | 1.123091 |
| 21 | United Arab Emirates | 2019 | 0.328024 | 1.123091 |
| 22 | United Arab Emirates | 2019 | 0.328024 | 1.123091 |
| 23 | United Arab Emirates | 2019 | 0.328024 | 1.123091 |
| 24 | United Kingdom       | 1990 | 1.193318 | 0.623683 |
| 25 | United Kingdom       | 1991 | 1.185042 | 0.617732 |
| 26 | United Kingdom       | 1992 | 1.191903 | 0.620316 |
| 27 | United Kingdom       | 1993 | 1.18015  | 0.616627 |
| 28 | United Kingdom       | 1994 | 1.184645 | 0.623098 |
| 29 | United Kingdom       | 1995 | 1.165368 | 0.618961 |
| 30 | United Kingdom       | 1996 | 1.162815 | 0.622685 |
| 31 | United Kingdom       | 1997 | 1.162376 | 0.626324 |
| 32 | United Kingdom       | 1998 | 1.151615 | 0.626223 |
| 33 | United Kingdom       | 1999 | 1.132918 | 0.618551 |
| 34 | United Kingdom       | 2000 | 1.133772 | 0.621896 |
| 35 | United Kingdom       | 2000 | 1.133772 | 0.621896 |
| 36 | United Kingdom       | 2000 | 1.133772 | 0.621896 |
| 37 | United Kingdom       | 2000 | 1.133772 | 0.621896 |
| 38 |                      |      |          |          |
| 39 |                      |      |          |          |
| 40 |                      |      |          |          |
| 41 |                      |      |          |          |
| 42 |                      |      |          |          |
| 43 |                      |      |          |          |
| 44 |                      |      |          |          |
| 45 |                      |      |          |          |
| 46 |                      |      |          |          |

|    |                             |      |          |          |
|----|-----------------------------|------|----------|----------|
| 1  |                             |      |          |          |
| 2  |                             |      |          |          |
| 3  |                             |      |          |          |
| 4  |                             |      |          |          |
| 5  | United Kingdom              | 2001 | 1.125533 | 0.620902 |
| 6  | United Kingdom              | 2002 | 1.116016 | 0.619005 |
| 7  | United Kingdom              | 2003 | 1.130571 | 0.631655 |
| 8  | United Kingdom              | 2004 | 1.141036 | 0.64618  |
| 9  | United Kingdom              | 2005 | 1.149652 | 0.659761 |
| 10 | United Kingdom              | 2006 | 1.140951 | 0.661428 |
| 11 | United Kingdom              | 2007 | 1.151446 | 0.673374 |
| 12 | United Kingdom              | 2008 | 1.158662 | 0.683882 |
| 13 | United Kingdom              | 2009 | 1.170397 | 0.694055 |
| 14 | United Kingdom              | 2010 | 1.196585 | 0.709307 |
| 15 | United Kingdom              | 2011 | 1.225876 | 0.723568 |
| 16 | United Kingdom              | 2012 | 1.252109 | 0.736999 |
| 17 | United Kingdom              | 2013 | 1.261349 | 0.746707 |
| 18 | United Kingdom              | 2014 | 1.272174 | 0.763126 |
| 19 | United Kingdom              | 2015 | 1.2565   | 0.769459 |
| 20 | United Kingdom              | 2016 | 1.240504 | 0.775236 |
| 21 | United Kingdom              | 2017 | 1.21352  | 0.77185  |
| 22 | United Kingdom              | 2018 | 1.186146 | 0.766796 |
| 23 | United Kingdom              | 2019 | 1.164712 | 0.764333 |
| 24 | United Republic of Tanzania | 1990 | 0.781522 | 0.703391 |
| 25 | United Republic of Tanzania | 1991 | 0.770668 | 0.692076 |
| 26 | United Republic of Tanzania | 1992 | 0.762312 | 0.682524 |
| 27 | United Republic of Tanzania | 1993 | 0.757432 | 0.675606 |
| 28 | United Republic of Tanzania | 1994 | 0.754777 | 0.669585 |
| 29 | United Republic of Tanzania | 1995 | 0.754556 | 0.665336 |
| 30 |                             |      |          |          |
| 31 |                             |      |          |          |
| 32 |                             |      |          |          |
| 33 |                             |      |          |          |
| 34 |                             |      |          |          |
| 35 |                             |      |          |          |
| 36 |                             |      |          |          |
| 37 |                             |      |          |          |
| 38 |                             |      |          |          |
| 39 |                             |      |          |          |
| 40 |                             |      |          |          |
| 41 |                             |      |          |          |
| 42 |                             |      |          |          |
| 43 |                             |      |          |          |
| 44 |                             |      |          |          |
| 45 |                             |      |          |          |
| 46 |                             |      |          |          |

1  
2  
3  
4  
5  
6  
7  
8  
9  
10  
11  
12  
13  
14  
15  
16  
17  
18  
19  
20  
21  
22  
23  
24  
25  
26  
27  
28  
29  
30  
31  
32  
33  
34  
35  
36  
37  
38  
39  
40  
41  
42  
43  
44  
45  
46

|                             |      |          |          |
|-----------------------------|------|----------|----------|
| United Republic of Tanzania | 1996 | 0.753179 | 0.660656 |
| United Republic of Tanzania | 1997 | 0.755772 | 0.65939  |
| United Republic of Tanzania | 1998 | 0.762045 | 0.661406 |
| United Republic of Tanzania | 1999 | 0.758868 | 0.656168 |
| United Republic of Tanzania | 2000 | 0.75477  | 0.650069 |
| United Republic of Tanzania | 2001 | 0.761333 | 0.652433 |
| United Republic of Tanzania | 2002 | 0.775263 | 0.660039 |
| United Republic of Tanzania | 2003 | 0.799231 | 0.675537 |
| United Republic of Tanzania | 2004 | 0.817084 | 0.687831 |
| United Republic of Tanzania | 2005 | 0.833331 | 0.699574 |
| United Republic of Tanzania | 2006 | 0.849816 | 0.70961  |
| United Republic of Tanzania | 2007 | 0.863137 | 0.718822 |
| United Republic of Tanzania | 2008 | 0.871853 | 0.726302 |
| United Republic of Tanzania | 2009 | 0.88892  | 0.738823 |
| United Republic of Tanzania | 2010 | 0.911233 | 0.758888 |
| United Republic of Tanzania | 2011 | 0.934464 | 0.780506 |
| United Republic of Tanzania | 2012 | 0.944435 | 0.790545 |
| United Republic of Tanzania | 2013 | 0.95813  | 0.803793 |
| United Republic of Tanzania | 2014 | 0.961943 | 0.812238 |
| United Republic of Tanzania | 2015 | 0.967976 | 0.817986 |
| United Republic of Tanzania | 2016 | 0.970737 | 0.825863 |
| United Republic of Tanzania | 2017 | 0.976471 | 0.836559 |
| United Republic of Tanzania | 2018 | 0.97822  | 0.842363 |
| United Republic of Tanzania | 2019 | 0.979223 | 0.848354 |
| United States of America    | 1990 | 1.121959 | 0.673713 |

|                          |      |          |          |
|--------------------------|------|----------|----------|
| United States of America | 1991 | 1.121152 | 0.673792 |
| United States of America | 1992 | 1.118823 | 0.672728 |
| United States of America | 1993 | 1.117914 | 0.672485 |
| United States of America | 1994 | 1.127135 | 0.678043 |
| United States of America | 1995 | 1.130951 | 0.681682 |
| United States of America | 1996 | 1.147801 | 0.692919 |
| United States of America | 1997 | 1.160897 | 0.703666 |
| United States of America | 1998 | 1.167934 | 0.711278 |
| United States of America | 1999 | 1.175995 | 0.721325 |
| United States of America | 2000 | 1.185469 | 0.731829 |
| United States of America | 2001 | 1.184596 | 0.736947 |
| United States of America | 2002 | 1.166022 | 0.730166 |
| United States of America | 2003 | 1.156228 | 0.729609 |
| United States of America | 2004 | 1.162079 | 0.737919 |
| United States of America | 2005 | 1.161446 | 0.741989 |
| United States of America | 2006 | 1.170441 | 0.752624 |
| United States of America | 2007 | 1.176848 | 0.761583 |
| United States of America | 2008 | 1.157902 | 0.754912 |
| United States of America | 2009 | 1.137414 | 0.747998 |
| United States of America | 2010 | 1.112516 | 0.737069 |
| United States of America | 2011 | 1.100105 | 0.735527 |
| United States of America | 2012 | 1.079197 | 0.728297 |
| United States of America | 2013 | 1.052712 | 0.717797 |
| United States of America | 2014 | 1.045775 | 0.71982  |
| United States of America | 2015 | 1.036761 | 0.720233 |



1  
2  
3  
4  
5  
6  
7  
8  
9  
10  
11  
12  
13  
14  
15  
16  
17  
18  
19  
20  
21  
22  
23  
24  
25  
26  
27  
28  
29  
30  
31  
32  
33  
34  
35  
36  
37  
38  
39  
40  
41  
42  
43  
44  
45  
46

|                              |      |          |          |
|------------------------------|------|----------|----------|
| United States of America     | 2016 | 1.018288 | 0.714376 |
| United States of America     | 2017 | 0.997852 | 0.705882 |
| United States of America     | 2018 | 0.970738 | 0.689814 |
| United States of America     | 2019 | 0.99178  | 0.704414 |
| United States Virgin Islands | 1990 | 0.873088 | 0.721712 |
| United States Virgin Islands | 1991 | 0.874237 | 0.725185 |
| United States Virgin Islands | 1992 | 0.870862 | 0.721844 |
| United States Virgin Islands | 1993 | 0.870139 | 0.720392 |
| United States Virgin Islands | 1994 | 0.875963 | 0.723101 |
| United States Virgin Islands | 1995 | 0.910227 | 0.749649 |
| United States Virgin Islands | 1996 | 0.91449  | 0.749982 |
| United States Virgin Islands | 1997 | 0.925431 | 0.756183 |
| United States Virgin Islands | 1998 | 0.934782 | 0.760012 |
| United States Virgin Islands | 1999 | 0.930633 | 0.751762 |
| United States Virgin Islands | 2000 | 0.956607 | 0.762725 |
| United States Virgin Islands | 2001 | 0.955895 | 0.760227 |
| United States Virgin Islands | 2002 | 0.959703 | 0.761204 |
| United States Virgin Islands | 2003 | 0.960362 | 0.761988 |
| United States Virgin Islands | 2004 | 0.96685  | 0.766782 |
| United States Virgin Islands | 2005 | 0.964826 | 0.766372 |
| United States Virgin Islands | 2006 | 0.926507 | 0.744328 |
| United States Virgin Islands | 2007 | 0.733662 | 0.621569 |
| United States Virgin Islands | 2008 | 0.734813 | 0.619853 |
| United States Virgin Islands | 2009 | 0.740848 | 0.622809 |
| United States Virgin Islands | 2010 | 0.746643 | 0.624255 |

|                              |      |          |          |
|------------------------------|------|----------|----------|
| United States Virgin Islands | 2011 | 0.748312 | 0.62212  |
| United States Virgin Islands | 2012 | 0.74953  | 0.619269 |
| United States Virgin Islands | 2013 | 0.748915 | 0.614179 |
| United States Virgin Islands | 2014 | 0.746855 | 0.60744  |
| United States Virgin Islands | 2015 | 0.742282 | 0.598189 |
| United States Virgin Islands | 2016 | 0.742383 | 0.591309 |
| United States Virgin Islands | 2017 | 0.750479 | 0.590251 |
| United States Virgin Islands | 2018 | 0.761021 | 0.590597 |
| United States Virgin Islands | 2019 | 0.771097 | 0.590125 |
| Uruguay                      | 1990 | 0.787892 | 0.531212 |
| Uruguay                      | 1991 | 0.815435 | 0.545513 |
| Uruguay                      | 1992 | 0.792603 | 0.529812 |
| Uruguay                      | 1993 | 0.792372 | 0.527085 |
| Uruguay                      | 1994 | 0.782112 | 0.517604 |
| Uruguay                      | 1995 | 0.776781 | 0.509406 |
| Uruguay                      | 1996 | 0.77837  | 0.508201 |
| Uruguay                      | 1997 | 0.800527 | 0.519526 |
| Uruguay                      | 1998 | 0.786886 | 0.508517 |
| Uruguay                      | 1999 | 0.810708 | 0.520204 |
| Uruguay                      | 2000 | 0.821543 | 0.525213 |
| Uruguay                      | 2001 | 0.846287 | 0.538567 |
| Uruguay                      | 2002 | 0.836056 | 0.528477 |
| Uruguay                      | 2003 | 0.864479 | 0.540434 |
| Uruguay                      | 2004 | 0.894154 | 0.553194 |
| Uruguay                      | 2005 | 0.908873 | 0.560506 |

|            |      |          |          |
|------------|------|----------|----------|
| Uruguay    | 2006 | 0.913924 | 0.560684 |
| Uruguay    | 2007 | 0.904512 | 0.551885 |
| Uruguay    | 2008 | 0.924715 | 0.562482 |
| Uruguay    | 2009 | 0.912966 | 0.55148  |
| Uruguay    | 2010 | 0.93959  | 0.561935 |
| Uruguay    | 2011 | 0.962523 | 0.566127 |
| Uruguay    | 2012 | 0.976484 | 0.571097 |
| Uruguay    | 2013 | 0.988945 | 0.57691  |
| Uruguay    | 2014 | 0.996598 | 0.579124 |
| Uruguay    | 2015 | 1.013463 | 0.586803 |
| Uruguay    | 2016 | 1.039523 | 0.59868  |
| Uruguay    | 2017 | 1.031497 | 0.593876 |
| Uruguay    | 2018 | 1.024607 | 0.589103 |
| Uruguay    | 2019 | 1.020814 | 0.586969 |
| Uzbekistan | 1990 | 1.053712 | 0.850642 |
| Uzbekistan | 1991 | 1.058001 | 0.854141 |
| Uzbekistan | 1992 | 1.078785 | 0.8679   |
| Uzbekistan | 1993 | 1.066371 | 0.853702 |
| Uzbekistan | 1994 | 1.030576 | 0.826133 |
| Uzbekistan | 1995 | 0.981071 | 0.793016 |
| Uzbekistan | 1996 | 0.943412 | 0.769216 |
| Uzbekistan | 1997 | 0.952693 | 0.779594 |
| Uzbekistan | 1998 | 0.966792 | 0.790835 |
| Uzbekistan | 1999 | 0.943803 | 0.773295 |
| Uzbekistan | 2000 | 0.917629 | 0.749618 |

|            |      |          |          |
|------------|------|----------|----------|
| Uzbekistan | 2001 | 0.899862 | 0.73214  |
| Uzbekistan | 2002 | 0.894435 | 0.723247 |
| Uzbekistan | 2003 | 0.892522 | 0.716783 |
| Uzbekistan | 2004 | 0.89648  | 0.716733 |
| Uzbekistan | 2005 | 0.897849 | 0.728357 |
| Uzbekistan | 2006 | 0.887354 | 0.723319 |
| Uzbekistan | 2007 | 0.879009 | 0.725456 |
| Uzbekistan | 2008 | 0.868701 | 0.718806 |
| Uzbekistan | 2009 | 0.865821 | 0.718362 |
| Uzbekistan | 2010 | 0.876619 | 0.731268 |
| Uzbekistan | 2011 | 0.865302 | 0.727632 |
| Uzbekistan | 2012 | 0.862568 | 0.731741 |
| Uzbekistan | 2013 | 0.856119 | 0.730918 |
| Uzbekistan | 2014 | 0.845965 | 0.724626 |
| Uzbekistan | 2015 | 0.845181 | 0.726931 |
| Uzbekistan | 2016 | 0.839304 | 0.728291 |
| Uzbekistan | 2017 | 0.838265 | 0.723642 |
| Uzbekistan | 2018 | 0.835082 | 0.719203 |
| Uzbekistan | 2019 | 0.831718 | 0.71384  |
| Vanuatu    | 1990 | 0.924689 | 1.062804 |
| Vanuatu    | 1991 | 0.959062 | 1.090159 |
| Vanuatu    | 1992 | 0.992102 | 1.11732  |
| Vanuatu    | 1993 | 1.015954 | 1.136811 |
| Vanuatu    | 1994 | 1.050027 | 1.165347 |
| Vanuatu    | 1995 | 1.057606 | 1.170658 |

|                                    |      |          |          |
|------------------------------------|------|----------|----------|
| Vanuatu                            | 1996 | 1.075089 | 1.181653 |
| Vanuatu                            | 1997 | 1.081546 | 1.182417 |
| Vanuatu                            | 1998 | 1.087602 | 1.181903 |
| Vanuatu                            | 1999 | 1.083482 | 1.169205 |
| Vanuatu                            | 2000 | 1.055304 | 1.134576 |
| Vanuatu                            | 2001 | 1.03525  | 1.103403 |
| Vanuatu                            | 2002 | 0.979033 | 1.042508 |
| Vanuatu                            | 2003 | 0.939    | 0.996405 |
| Vanuatu                            | 2004 | 0.932133 | 0.979734 |
| Vanuatu                            | 2005 | 0.931551 | 0.967699 |
| Vanuatu                            | 2006 | 0.933997 | 0.962733 |
| Vanuatu                            | 2007 | 0.937084 | 0.957964 |
| Vanuatu                            | 2008 | 0.939521 | 0.955358 |
| Vanuatu                            | 2009 | 0.939143 | 0.952518 |
| Vanuatu                            | 2010 | 0.938401 | 0.95149  |
| Vanuatu                            | 2011 | 0.947135 | 0.960747 |
| Vanuatu                            | 2012 | 0.945052 | 0.960552 |
| Vanuatu                            | 2013 | 0.941907 | 0.960476 |
| Vanuatu                            | 2014 | 0.930911 | 0.952544 |
| Vanuatu                            | 2015 | 0.923052 | 0.947129 |
| Vanuatu                            | 2016 | 0.912979 | 0.93965  |
| Vanuatu                            | 2017 | 0.911947 | 0.940753 |
| Vanuatu                            | 2018 | 0.909456 | 0.940258 |
| Vanuatu                            | 2019 | 0.90635  | 0.939138 |
| Venezuela (Bolivarian Republic of) | 1990 | 0.816605 | 0.702689 |

|                                    |      |          |          |
|------------------------------------|------|----------|----------|
| Venezuela (Bolivarian Republic of) | 1991 | 0.804698 | 0.693203 |
| Venezuela (Bolivarian Republic of) | 1992 | 0.798843 | 0.686705 |
| Venezuela (Bolivarian Republic of) | 1993 | 0.757611 | 0.641868 |
| Venezuela (Bolivarian Republic of) | 1994 | 0.773954 | 0.64284  |
| Venezuela (Bolivarian Republic of) | 1995 | 0.78569  | 0.650344 |
| Venezuela (Bolivarian Republic of) | 1996 | 0.827465 | 0.689124 |
| Venezuela (Bolivarian Republic of) | 1997 | 0.859391 | 0.715852 |
| Venezuela (Bolivarian Republic of) | 1998 | 0.810625 | 0.676084 |
| Venezuela (Bolivarian Republic of) | 1999 | 0.831487 | 0.694345 |
| Venezuela (Bolivarian Republic of) | 2000 | 0.803139 | 0.671118 |
| Venezuela (Bolivarian Republic of) | 2001 | 0.799291 | 0.667806 |
| Venezuela (Bolivarian Republic of) | 2002 | 0.827619 | 0.684559 |
| Venezuela (Bolivarian Republic of) | 2003 | 0.765497 | 0.632291 |
| Venezuela (Bolivarian Republic of) | 2004 | 0.775109 | 0.637159 |
| Venezuela (Bolivarian Republic of) | 2005 | 0.759502 | 0.621158 |
| Venezuela (Bolivarian Republic of) | 2006 | 0.708105 | 0.576335 |
| Venezuela (Bolivarian Republic of) | 2007 | 0.670884 | 0.544186 |
| Venezuela (Bolivarian Republic of) | 2008 | 0.667097 | 0.540119 |
| Venezuela (Bolivarian Republic of) | 2009 | 0.678994 | 0.548394 |
| Venezuela (Bolivarian Republic of) | 2010 | 0.768656 | 0.622094 |
| Venezuela (Bolivarian Republic of) | 2011 | 0.78214  | 0.635776 |
| Venezuela (Bolivarian Republic of) | 2012 | 0.752834 | 0.615282 |
| Venezuela (Bolivarian Republic of) | 2013 | 0.769992 | 0.630856 |
| Venezuela (Bolivarian Republic of) | 2014 | 0.884428 | 0.726306 |
| Venezuela (Bolivarian Republic of) | 2015 | 0.880047 | 0.72823  |

|                                    |      |          |          |
|------------------------------------|------|----------|----------|
| Venezuela (Bolivarian Republic of) | 2016 | 0.860449 | 0.71614  |
| Venezuela (Bolivarian Republic of) | 2017 | 0.828765 | 0.692569 |
| Venezuela (Bolivarian Republic of) | 2018 | 0.805853 | 0.675996 |
| Venezuela (Bolivarian Republic of) | 2019 | 0.785368 | 0.659536 |
| Viet Nam                           | 1990 | 1.930348 | 1.258255 |
| Viet Nam                           | 1991 | 1.895754 | 1.240529 |
| Viet Nam                           | 1992 | 1.868496 | 1.226206 |
| Viet Nam                           | 1993 | 1.841509 | 1.210638 |
| Viet Nam                           | 1994 | 1.813586 | 1.193323 |
| Viet Nam                           | 1995 | 1.782829 | 1.172882 |
| Viet Nam                           | 1996 | 1.743699 | 1.147006 |
| Viet Nam                           | 1997 | 1.709193 | 1.122924 |
| Viet Nam                           | 1998 | 1.672772 | 1.096766 |
| Viet Nam                           | 1999 | 1.63651  | 1.070041 |
| Viet Nam                           | 2000 | 1.579058 | 1.030261 |
| Viet Nam                           | 2001 | 1.521513 | 0.993379 |
| Viet Nam                           | 2002 | 1.47358  | 0.962    |
| Viet Nam                           | 2003 | 1.431813 | 0.932566 |
| Viet Nam                           | 2004 | 1.392316 | 0.903543 |
| Viet Nam                           | 2005 | 1.353006 | 0.874162 |
| Viet Nam                           | 2006 | 1.337065 | 0.859607 |
| Viet Nam                           | 2007 | 1.324604 | 0.850056 |
| Viet Nam                           | 2008 | 1.323289 | 0.849737 |
| Viet Nam                           | 2009 | 1.321261 | 0.852674 |
| Viet Nam                           | 2010 | 1.328771 | 0.860246 |

|    |          |      |          |          |
|----|----------|------|----------|----------|
| 1  |          |      |          |          |
| 2  |          |      |          |          |
| 3  |          |      |          |          |
| 4  |          |      |          |          |
| 5  | Viet Nam | 2011 | 1.341013 | 0.87573  |
| 6  | Viet Nam | 2012 | 1.354551 | 0.89126  |
| 7  | Viet Nam | 2013 | 1.369053 | 0.906847 |
| 8  | Viet Nam | 2014 | 1.387531 | 0.923227 |
| 9  | Viet Nam | 2015 | 1.409908 | 0.938181 |
| 10 | Viet Nam | 2016 | 1.431575 | 0.953848 |
| 11 | Viet Nam | 2017 | 1.459148 | 0.972659 |
| 12 | Viet Nam | 2018 | 1.486234 | 0.990891 |
| 13 | Viet Nam | 2019 | 1.508687 | 1.006537 |
| 14 | Yemen    | 1990 | 0.981841 | 0.746822 |
| 15 | Yemen    | 1991 | 0.968788 | 0.745728 |
| 16 | Yemen    | 1992 | 0.950842 | 0.740663 |
| 17 | Yemen    | 1993 | 0.932491 | 0.735044 |
| 18 | Yemen    | 1994 | 0.913991 | 0.729153 |
| 19 | Yemen    | 1995 | 0.904266 | 0.730324 |
| 20 | Yemen    | 1996 | 0.896218 | 0.731679 |
| 21 | Yemen    | 1997 | 0.882889 | 0.728787 |
| 22 | Yemen    | 1998 | 0.870341 | 0.726354 |
| 23 | Yemen    | 1999 | 0.857908 | 0.723453 |
| 24 | Yemen    | 2000 | 0.847074 | 0.721681 |
| 25 | Yemen    | 2001 | 0.837908 | 0.720832 |
| 26 | Yemen    | 2002 | 0.832844 | 0.720939 |
| 27 | Yemen    | 2003 | 0.82958  | 0.723923 |
| 28 | Yemen    | 2004 | 0.828547 | 0.727283 |
| 29 | Yemen    | 2005 | 0.830121 | 0.733911 |
| 30 |          |      |          |          |
| 31 |          |      |          |          |
| 32 |          |      |          |          |
| 33 |          |      |          |          |
| 34 |          |      |          |          |
| 35 |          |      |          |          |
| 36 |          |      |          |          |
| 37 |          |      |          |          |
| 38 |          |      |          |          |
| 39 |          |      |          |          |
| 40 |          |      |          |          |
| 41 |          |      |          |          |
| 42 |          |      |          |          |
| 43 |          |      |          |          |
| 44 |          |      |          |          |
| 45 |          |      |          |          |
| 46 |          |      |          |          |



1  
2  
3  
4  
5  
6  
7  
8  
9  
10  
11  
12  
13  
14  
15  
16  
17  
18  
19  
20  
21  
22  
23  
24  
25  
26  
27  
28  
29  
30  
31  
32  
33  
34  
35  
36  
37  
38  
39  
40  
41  
42  
43  
44  
45  
46

|        |      |          |          |
|--------|------|----------|----------|
| Yemen  | 2006 | 0.829255 | 0.735995 |
| Yemen  | 2007 | 0.83175  | 0.740204 |
| Yemen  | 2008 | 0.832213 | 0.742458 |
| Yemen  | 2009 | 0.832872 | 0.745576 |
| Yemen  | 2010 | 0.835204 | 0.752401 |
| Yemen  | 2011 | 0.845055 | 0.763452 |
| Yemen  | 2012 | 0.853337 | 0.773794 |
| Yemen  | 2013 | 0.862728 | 0.784063 |
| Yemen  | 2014 | 0.869438 | 0.792211 |
| Yemen  | 2015 | 0.873679 | 0.798236 |
| Yemen  | 2016 | 0.879447 | 0.80375  |
| Yemen  | 2017 | 0.885689 | 0.808814 |
| Yemen  | 2018 | 0.891526 | 0.812253 |
| Yemen  | 2019 | 0.897097 | 0.814499 |
| Zambia | 1990 | 0.874025 | 0.844793 |
| Zambia | 1991 | 0.860211 | 0.835418 |
| Zambia | 1992 | 0.844285 | 0.825868 |
| Zambia | 1993 | 0.821036 | 0.808517 |
| Zambia | 1994 | 0.809962 | 0.801534 |
| Zambia | 1995 | 0.79626  | 0.791593 |
| Zambia | 1996 | 0.782948 | 0.782316 |
| Zambia | 1997 | 0.766796 | 0.76913  |
| Zambia | 1998 | 0.750685 | 0.754682 |
| Zambia | 1999 | 0.732818 | 0.737519 |
| Zambia | 2000 | 0.707935 | 0.712561 |

|          |      |          |          |
|----------|------|----------|----------|
| Zambia   | 2001 | 0.693031 | 0.695964 |
| Zambia   | 2002 | 0.677749 | 0.678508 |
| Zambia   | 2003 | 0.667889 | 0.664051 |
| Zambia   | 2004 | 0.659869 | 0.648766 |
| Zambia   | 2005 | 0.655895 | 0.638442 |
| Zambia   | 2006 | 0.660793 | 0.637345 |
| Zambia   | 2007 | 0.659858 | 0.631617 |
| Zambia   | 2008 | 0.660439 | 0.627202 |
| Zambia   | 2009 | 0.667305 | 0.629889 |
| Zambia   | 2010 | 0.679315 | 0.637493 |
| Zambia   | 2011 | 0.69254  | 0.647015 |
| Zambia   | 2012 | 0.707016 | 0.658908 |
| Zambia   | 2013 | 0.720994 | 0.669655 |
| Zambia   | 2014 | 0.729531 | 0.67707  |
| Zambia   | 2015 | 0.735597 | 0.683088 |
| Zambia   | 2016 | 0.741109 | 0.689189 |
| Zambia   | 2017 | 0.749312 | 0.697265 |
| Zambia   | 2018 | 0.752969 | 0.70141  |
| Zambia   | 2019 | 0.759635 | 0.707038 |
| Zimbabwe | 1990 | 0.661655 | 0.555791 |
| Zimbabwe | 1991 | 0.640232 | 0.541326 |
| Zimbabwe | 1992 | 0.610999 | 0.522021 |
| Zimbabwe | 1993 | 0.567077 | 0.49111  |
| Zimbabwe | 1994 | 0.515934 | 0.449828 |
| Zimbabwe | 1995 | 0.461896 | 0.404784 |

1  
2  
3  
4  
5  
6  
7  
8  
9  
10  
11  
12  
13  
14  
15  
16  
17  
18  
19  
20  
21  
22  
23  
24  
25  
26  
27  
28  
29  
30  
31  
32  
33  
34  
35  
36  
37  
38  
39  
40  
41  
42  
43  
44  
45  
46

|          |      |          |          |
|----------|------|----------|----------|
| Zimbabwe | 1996 | 0.418462 | 0.364105 |
| Zimbabwe | 1997 | 0.392742 | 0.335841 |
| Zimbabwe | 1998 | 0.414159 | 0.346022 |
| Zimbabwe | 1999 | 0.449094 | 0.366171 |
| Zimbabwe | 2000 | 0.487121 | 0.389527 |
| Zimbabwe | 2001 | 0.512585 | 0.40252  |
| Zimbabwe | 2002 | 0.54821  | 0.423934 |
| Zimbabwe | 2003 | 0.584949 | 0.445465 |
| Zimbabwe | 2004 | 0.618119 | 0.464381 |
| Zimbabwe | 2005 | 0.616168 | 0.459484 |
| Zimbabwe | 2006 | 0.640547 | 0.473186 |
| Zimbabwe | 2007 | 0.658688 | 0.483898 |
| Zimbabwe | 2008 | 0.694945 | 0.507221 |
| Zimbabwe | 2009 | 0.7293   | 0.52948  |
| Zimbabwe | 2010 | 0.733864 | 0.532571 |
| Zimbabwe | 2011 | 0.724001 | 0.525821 |
| Zimbabwe | 2012 | 0.727939 | 0.527944 |
| Zimbabwe | 2013 | 0.739323 | 0.534652 |
| Zimbabwe | 2014 | 0.759521 | 0.547145 |
| Zimbabwe | 2015 | 0.758458 | 0.546135 |
| Zimbabwe | 2016 | 0.756162 | 0.544612 |
| Zimbabwe | 2017 | 0.757829 | 0.544924 |
| Zimbabwe | 2018 | 0.757228 | 0.54387  |
| Zimbabwe | 2019 | 0.757349 | 0.543382 |

## STROBE Statement—checklist of items that should be included in reports of observational studies

|                              | Item No                                                                                                                                                                                                                                                                                                   | Recommendation                                                                                                                                                                                                                                                                                                                                                                                                                                                         | Page No |
|------------------------------|-----------------------------------------------------------------------------------------------------------------------------------------------------------------------------------------------------------------------------------------------------------------------------------------------------------|------------------------------------------------------------------------------------------------------------------------------------------------------------------------------------------------------------------------------------------------------------------------------------------------------------------------------------------------------------------------------------------------------------------------------------------------------------------------|---------|
| <b>Title and abstract</b>    | 1                                                                                                                                                                                                                                                                                                         | (a) Indicate the study's design with a commonly used term in the title or the abstract                                                                                                                                                                                                                                                                                                                                                                                 | 2       |
|                              |                                                                                                                                                                                                                                                                                                           | (b) Provide in the abstract an informative and balanced summary of what was done and what was found                                                                                                                                                                                                                                                                                                                                                                    | 2       |
| <b>Introduction</b>          |                                                                                                                                                                                                                                                                                                           |                                                                                                                                                                                                                                                                                                                                                                                                                                                                        |         |
| Background/rationale         | 2                                                                                                                                                                                                                                                                                                         | Explain the scientific background and rationale for the investigation being reported                                                                                                                                                                                                                                                                                                                                                                                   | 4       |
| Objectives                   | 3                                                                                                                                                                                                                                                                                                         | State specific objectives, including any prespecified hypotheses                                                                                                                                                                                                                                                                                                                                                                                                       | 4       |
| <b>Methods</b>               |                                                                                                                                                                                                                                                                                                           |                                                                                                                                                                                                                                                                                                                                                                                                                                                                        |         |
| Study design                 | 4                                                                                                                                                                                                                                                                                                         | Present key elements of study design early in the paper                                                                                                                                                                                                                                                                                                                                                                                                                | 4       |
| Setting                      | 5                                                                                                                                                                                                                                                                                                         | Describe the setting, locations, and relevant dates, including periods of recruitment, exposure, follow-up, and data collection                                                                                                                                                                                                                                                                                                                                        | 4       |
| Participants                 | 6                                                                                                                                                                                                                                                                                                         | (a) <i>Cohort study</i> —Give the eligibility criteria, and the sources and methods of selection of participants. Describe methods of follow-up<br><i>Case-control study</i> —Give the eligibility criteria, and the sources and methods of case ascertainment and control selection. Give the rationale for the choice of cases and controls<br><i>Cross-sectional study</i> —Give the eligibility criteria, and the sources and methods of selection of participants | 4       |
|                              |                                                                                                                                                                                                                                                                                                           | (b) <i>Cohort study</i> —For matched studies, give matching criteria and number of exposed and unexposed<br><i>Case-control study</i> —For matched studies, give matching criteria and the number of controls per case                                                                                                                                                                                                                                                 | NA      |
| Variables                    | 7                                                                                                                                                                                                                                                                                                         | Clearly define all outcomes, exposures, predictors, potential confounders, and effect modifiers. Give diagnostic criteria, if applicable                                                                                                                                                                                                                                                                                                                               | NA      |
| Data sources/<br>measurement | 8*                                                                                                                                                                                                                                                                                                        | For each variable of interest, give sources of data and details of methods of assessment (measurement). Describe comparability of assessment methods if there is more than one group                                                                                                                                                                                                                                                                                   | 4       |
| Bias                         | 9                                                                                                                                                                                                                                                                                                         | Describe any efforts to address potential sources of bias                                                                                                                                                                                                                                                                                                                                                                                                              | NA      |
| Study size                   | 10                                                                                                                                                                                                                                                                                                        | Explain how the study size was arrived at                                                                                                                                                                                                                                                                                                                                                                                                                              | NA      |
| Quantitative variables       | 11                                                                                                                                                                                                                                                                                                        | Explain how quantitative variables were handled in the analyses. If applicable, describe which groupings were chosen and why                                                                                                                                                                                                                                                                                                                                           | NA      |
| Statistical methods          | 12                                                                                                                                                                                                                                                                                                        | (a) Describe all statistical methods, including those used to control for confounding                                                                                                                                                                                                                                                                                                                                                                                  | 4, 5    |
|                              |                                                                                                                                                                                                                                                                                                           | (b) Describe any methods used to examine subgroups and interactions                                                                                                                                                                                                                                                                                                                                                                                                    | 4, 5    |
|                              | (c) Explain how missing data were addressed                                                                                                                                                                                                                                                               | NA                                                                                                                                                                                                                                                                                                                                                                                                                                                                     |         |
|                              | (d) <i>Cohort study</i> —If applicable, explain how loss to follow-up was addressed<br><i>Case-control study</i> —If applicable, explain how matching of cases and controls was addressed<br><i>Cross-sectional study</i> —If applicable, describe analytical methods taking account of sampling strategy | NA                                                                                                                                                                                                                                                                                                                                                                                                                                                                     |         |
|                              | (e) Describe any sensitivity analyses                                                                                                                                                                                                                                                                     | NA                                                                                                                                                                                                                                                                                                                                                                                                                                                                     |         |

Continued on next page

1  
2  
3  
4  
5  
6  
7  
8  
9  
10  
11  
12  
13  
14  
15  
16  
17  
18  
19  
20  
21  
22  
23  
24  
25  
26  
27  
28  
29  
30  
31  
32  
33  
34  
35  
36  
37  
38  
39  
40  
41  
42  
43  
44  
45  
46  
47  
48  
49  
50  
51  
52  
53  
54  
55  
56  
57  
58  
59  
60**Results**

|                  |     |                                                                                                                                                                                                              |      |
|------------------|-----|--------------------------------------------------------------------------------------------------------------------------------------------------------------------------------------------------------------|------|
| Participants     | 13* | (a) Report numbers of individuals at each stage of study—eg numbers potentially eligible, examined for eligibility, confirmed eligible, included in the study, completing follow-up, and analysed            | 5, 6 |
|                  |     | (b) Give reasons for non-participation at each stage                                                                                                                                                         | NA   |
|                  |     | (c) Consider use of a flow diagram                                                                                                                                                                           | NA   |
| Descriptive data | 14* | (a) Give characteristics of study participants (eg demographic, clinical, social) and information on exposures and potential confounders                                                                     | 5, 6 |
|                  |     | (b) Indicate number of participants with missing data for each variable of interest                                                                                                                          | NA   |
|                  |     | (c) <i>Cohort study</i> —Summarise follow-up time (eg, average and total amount)                                                                                                                             | NA   |
| Outcome data     | 15* | <i>Cohort study</i> —Report numbers of outcome events or summary measures over time                                                                                                                          | 5    |
|                  |     | <i>Case-control study</i> —Report numbers in each exposure category, or summary measures of exposure                                                                                                         | NA   |
|                  |     | <i>Cross-sectional study</i> —Report numbers of outcome events or summary measures                                                                                                                           | NA   |
| Main results     | 16  | (a) Give unadjusted estimates and, if applicable, confounder-adjusted estimates and their precision (eg, 95% confidence interval). Make clear which confounders were adjusted for and why they were included | 5-8  |
|                  |     | (b) Report category boundaries when continuous variables were categorized                                                                                                                                    | NA   |
|                  |     | (c) If relevant, consider translating estimates of relative risk into absolute risk for a meaningful time period                                                                                             | NA   |
| Other analyses   | 17  | Report other analyses done—eg analyses of subgroups and interactions, and sensitivity analyses                                                                                                               | NA   |

**Discussion**

|                  |    |                                                                                                                                                                            |      |
|------------------|----|----------------------------------------------------------------------------------------------------------------------------------------------------------------------------|------|
| Key results      | 18 | Summarise key results with reference to study objectives                                                                                                                   | 5-8  |
| Limitations      | 19 | Discuss limitations of the study, taking into account sources of potential bias or imprecision. Discuss both direction and magnitude of any potential bias                 | 10   |
| Interpretation   | 20 | Give a cautious overall interpretation of results considering objectives, limitations, multiplicity of analyses, results from similar studies, and other relevant evidence | 10   |
| Generalisability | 21 | Discuss the generalisability (external validity) of the study results                                                                                                      | 8-10 |

**Other information**

|         |    |                                                                                                                                                               |    |
|---------|----|---------------------------------------------------------------------------------------------------------------------------------------------------------------|----|
| Funding | 22 | Give the source of funding and the role of the funders for the present study and, if applicable, for the original study on which the present article is based | 11 |
|---------|----|---------------------------------------------------------------------------------------------------------------------------------------------------------------|----|

\*Give information separately for cases and controls in case-control studies and, if applicable, for exposed and unexposed groups in cohort and cross-sectional studies.

**Note:** An Explanation and Elaboration article discusses each checklist item and gives methodological background and published examples of transparent reporting. The STROBE checklist is best used in conjunction with this article (freely available on the Web sites of PLoS Medicine at <http://www.plosmedicine.org/>, Annals of Internal Medicine at <http://www.annals.org/>, and Epidemiology at <http://www.epidem.com/>). Information on the STROBE Initiative is available at [www.strobe-statement.org](http://www.strobe-statement.org).

# BMJ Open

## Secular Trends of Epidemiologic Patterns of Chronic Kidney Disease Over Three Decades: An Updated Analysis of the Global Burden of Disease Study 2019

|                                 |                                                                                                                                                                                                                                                                                                                                                                                                                                                                                                                                                                                                                                                                                                                                                                                                                                                                                                                                                                                                                                                                                                                                                               |
|---------------------------------|---------------------------------------------------------------------------------------------------------------------------------------------------------------------------------------------------------------------------------------------------------------------------------------------------------------------------------------------------------------------------------------------------------------------------------------------------------------------------------------------------------------------------------------------------------------------------------------------------------------------------------------------------------------------------------------------------------------------------------------------------------------------------------------------------------------------------------------------------------------------------------------------------------------------------------------------------------------------------------------------------------------------------------------------------------------------------------------------------------------------------------------------------------------|
| Journal:                        | <i>BMJ Open</i>                                                                                                                                                                                                                                                                                                                                                                                                                                                                                                                                                                                                                                                                                                                                                                                                                                                                                                                                                                                                                                                                                                                                               |
| Manuscript ID                   | bmjopen-2022-064540.R3                                                                                                                                                                                                                                                                                                                                                                                                                                                                                                                                                                                                                                                                                                                                                                                                                                                                                                                                                                                                                                                                                                                                        |
| Article Type:                   | Original research                                                                                                                                                                                                                                                                                                                                                                                                                                                                                                                                                                                                                                                                                                                                                                                                                                                                                                                                                                                                                                                                                                                                             |
| Date Submitted by the Author:   | 09-Mar-2023                                                                                                                                                                                                                                                                                                                                                                                                                                                                                                                                                                                                                                                                                                                                                                                                                                                                                                                                                                                                                                                                                                                                                   |
| Complete List of Authors:       | Feng, Xiaojin; Affiliated Hospital of Weifang Medical University, Department of Endocrinology and Metabolism; Affiliated Hospital of Weifang Medical University, Department of Clinical Research Center<br>Hou, Ningning; Affiliated Hospital of Weifang Medical University, Department of Endocrinology and Metabolism<br>Chen, Zhenna; Affiliated Hospital of Weifang Medical University, Department of Ophthalmology<br>Liu, Jing; The Second Affiliated Hospital of Shaanxi University of Chinese Medicine, Department of Cardiovascular Medicine<br>Li, Xue; Affiliated Hospital of Weifang Medical University, Department of Clinical Research Center; Affiliated Hospital of Weifang Medical University, Department of Pathology<br>Sun, Xiaodong; Affiliated Hospital of Weifang Medical University, Department of Endocrinology and Metabolism; Affiliated Hospital of Weifang Medical University, Department of Clinical Research Center<br>Liu, Yongping; Affiliated Hospital of Weifang Medical University, Department of Endocrinology and Metabolism; Affiliated Hospital of Weifang Medical University, Department of Clinical Research Center |
| <b>Primary Subject Heading</b>: | Global health                                                                                                                                                                                                                                                                                                                                                                                                                                                                                                                                                                                                                                                                                                                                                                                                                                                                                                                                                                                                                                                                                                                                                 |
| Secondary Subject Heading:      | Epidemiology, Global health                                                                                                                                                                                                                                                                                                                                                                                                                                                                                                                                                                                                                                                                                                                                                                                                                                                                                                                                                                                                                                                                                                                                   |
| Keywords:                       | PUBLIC HEALTH, EPIDEMIOLOGY, Chronic renal failure < NEPHROLOGY                                                                                                                                                                                                                                                                                                                                                                                                                                                                                                                                                                                                                                                                                                                                                                                                                                                                                                                                                                                                                                                                                               |
|                                 |                                                                                                                                                                                                                                                                                                                                                                                                                                                                                                                                                                                                                                                                                                                                                                                                                                                                                                                                                                                                                                                                                                                                                               |

SCHOLARONE™  
Manuscripts

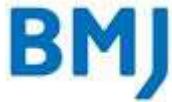

I, the Submitting Author has the right to grant and does grant on behalf of all authors of the Work (as defined in the below author licence), an exclusive licence and/or a non-exclusive licence for contributions from authors who are: i) UK Crown employees; ii) where BMJ has agreed a CC-BY licence shall apply, and/or iii) in accordance with the terms applicable for US Federal Government officers or employees acting as part of their official duties; on a worldwide, perpetual, irrevocable, royalty-free basis to BMJ Publishing Group Ltd ("BMJ") its licensees and where the relevant Journal is co-owned by BMJ to the co-owners of the Journal, to publish the Work in this journal and any other BMJ products and to exploit all rights, as set out in our [licence](#).

The Submitting Author accepts and understands that any supply made under these terms is made by BMJ to the Submitting Author unless you are acting as an employee on behalf of your employer or a postgraduate student of an affiliated institution which is paying any applicable article publishing charge ("APC") for Open Access articles. Where the Submitting Author wishes to make the Work available on an Open Access basis (and intends to pay the relevant APC), the terms of reuse of such Open Access shall be governed by a Creative Commons licence – details of these licences and which [Creative Commons](#) licence will apply to this Work are set out in our licence referred to above.

Other than as permitted in any relevant BMJ Author's Self Archiving Policies, I confirm this Work has not been accepted for publication elsewhere, is not being considered for publication elsewhere and does not duplicate material already published. I confirm all authors consent to publication of this Work and authorise the granting of this licence.

# Secular Trends of Epidemiologic Patterns of Chronic Kidney Disease Over Three Decades: An Updated Analysis of the Global Burden of Disease Study 2019

Xiaojin Feng<sup>1,2†</sup>, Ningning Hou<sup>1†</sup>, Zhenna Chen<sup>3†</sup>, Jing Liu<sup>4</sup>, Xue Li<sup>2,5</sup>, Xiaodong Sun<sup>1,2\*</sup>, and Yongping Liu<sup>1,2\*</sup>

<sup>1</sup>Department of Endocrinology and Metabolism, Affiliated Hospital of Weifang Medical University, Weifang, China

<sup>2</sup>Department of Clinical Research Center, Affiliated Hospital of Weifang Medical University, Weifang, China

<sup>3</sup>Department of Ophthalmology, Affiliated Hospital of Weifang Medical University, Weifang, China

<sup>4</sup>Department of Cardiovascular Medicine, The Second Affiliated Hospital of Shaanxi University of Chinese Medicine, Xianyang, China

<sup>5</sup>Department of Pathology, Affiliated Hospital of Weifang Medical University, Weifang, China

†These authors have contributed equally to this work and share first authorship

## \* Correspondence:

Yongping Liu, M.D., Ph.D., Department of Endocrinology and Metabolism, Affiliated Hospital of Weifang Medical University, No. 2428 Yuhe Road, Weifang, Shandong, 261000, China. Email: lypfree@hotmail.com

Xiaodong Sun, M.D., Ph.D., Department of Endocrinology and Metabolism, Affiliated Hospital of Weifang Medical University, No. 2428 Yuhe Road, Weifang, Shandong, 261000, China. Email: xiaodong.sun@wfmc.edu.cn

Word count: 3986

**Keywords:** Chronic kidney disease, global burden of disease, death, aging, risk factors



1  
2  
3 25 **Abstract**

4 26 **Objectives:** To assess the characteristics of the global death burden imposed by  
5 27 chronic kidney disease (CKD) and the attributable risk factors from 1990 to 2019 to  
6 28 help inform a framework for policy discussions, resource allocation and research  
7 29 priorities.

8 30 **Design:** A population-based observational study.

9 31 **Setting:** The death data and relative risk factors were obtained from the Global  
10 32 Burden of Disease (GBD) Study 2019 database.

11 33 **Main outcome measures:** Based on the GBD database, we estimated the death  
12 34 burden attributable to CKD stratified by sociodemographic index (SDI), geographic  
13 35 location, sex, age group, time period and risk factors from 1990 to 2019.

14 36 **Results:** Over 3-decade study period, the global number of CKD-related deaths  
15 37 increased from 0.60 million (95% UI: 0.57-0.63 million) in 1990 to 1.43 million (95%  
16 38 UI: 1.31-1.52 million) in 2019. The age-standardized death rate (ASDR) of CKD,  
17 39 among all causes, increased from 15th in 1990 to 10th in 2019. Globally, the ASDR in  
18 40 males was higher than that in females. CKD-related deaths mainly occurred in those  
19 41 aged over 50 years, especially in regions with higher SDIs. The ASDR was negatively  
20 42 related to SDI ( $\rho = -0.603$ ,  $P < 0.0001$ ). Among risk factors, metabolic risk factors,  
21 43 especially systolic blood pressure (SBP), fasting plasma glucose (FPG) and body  
22 44 mass index (BMI), were the main contributors to CKD-related deaths. Although the  
23 45 high-temperature-related death burden was low, the trend increased sharply in lower  
24 46 SDI regions.

25 47 **Conclusions:** CKD-related deaths continue to increase, with the majority occurring in  
26 48 elderly adults. The CKD-related death burden is higher in males than in females.  
27 49 Additionally, the increasing high-temperature-related death burdens in lower SDI  
28 50 regions should receive social attention.

29 51  
30  
31  
32  
33  
34  
35  
36  
37  
38  
39  
40  
41  
42  
43  
44  
45  
46  
47  
48  
49  
50  
51  
52  
53  
54  
55  
56  
57  
58  
59  
60

1  
2  
3 52 **Strengths and limitations of this study**

- 4 53 ➤ This study evaluated the disease burden changing trends of chronic kidney  
5 54 disease over the past three decades.  
6 55 ➤ The disease burden changing trends and the relative risk factors of CKD were  
7 56 quantified to reveal the extent of the epidemic and suggest a framework for policy  
8 57 discussions, resource allocation and research priorities.  
9 58 ➤ Data on the impact of metabolic factors other than blood pressure and blood  
10 59 glucose, such as triglycerides, cholesterol or uric acid, on the global burden of  
11 60 CKD are lacking.  
12 61

13  
14  
15  
16  
17  
18  
19  
20  
21  
22  
23  
24  
25  
26  
27  
28  
29  
30  
31  
32  
33  
34  
35  
36  
37  
38  
39  
40  
41  
42  
43  
44  
45  
46  
47  
48  
49  
50  
51  
52  
53  
54  
55  
56  
57  
58  
59  
60

For peer review only

## 62 INTRODUCTION

63 Chronic kidney disease (CKD) refers to chronic renal dysfunction caused by various  
64 factors for more than 3 months.[1, 2] According to relevant statistics, there were an  
65 estimated 697.5 million cases of CKD worldwide in 2017.[1] The prevalence of CKD  
66 has increased with the aging of the population and has become a global public health  
67 problem.[3] The incidence rate increased by 29.3% compared with that in 1990.[1]  
68 Once diagnosed with CKD, the kidney function would gradually decline until the end-  
69 stage renal disease or even death, with little chance of reversal, imposing a heavy  
70 economic burden on society.

71 Studies have found that the sociodemographic index (SDI), human development level,  
72 economic situation, and health access and quality index are closely related to the CKD  
73 incidence.[4-7] Complex influencing factors make the diagnosis and treatment of  
74 CKD difficult, which seriously increases the public health burden.[8, 9] Although  
75 several studies on CKD have been conducted,[1, 10] detailed death burden analyses of  
76 recent 3-decade period are scarce and need to be further studied.

77 In the context of current global Big Data, deep quantitative analyses of CKD  
78 morbidity and mortality and their influencing factors are crucial in guiding decisions  
79 by policymakers and health care providers. However, the details of CKD-related  
80 mortality have been poorly studied worldwide. Considering these factors, we carried  
81 out research on the global CKD-related death burden and related risk factors from  
82 1990-2019. We also analyzed the numbers of deaths caused by CKD and the age-  
83 standardized death rates (ASDRs) by time period, region, age, risk factors and sex.

## 85 MATERIALS AND METHODS

### 86 Study data

87 Data analyzed in the present study were obtained from the online database the Global  
88 Health Data Exchange (GHDx) query tool ([http://ghdx.healthdata.org/gbd-results-  
89 tool](http://ghdx.healthdata.org/gbd-results-tool)), which were based on literature studies, survey data, surveillance data, medical  
90 records, health insurance claims and statistical model analysis.[11] The database  
91 provides epidemiological data about 369 diseases and 87 attributable risk factors in  
92 204 countries and territories from January 1, 1990 to December 31, 2019,  
93 disaggregated by time, location and sex, and is constantly updated by ongoing  
94 multinational cooperative organizations.[12, 13] Detailed research methods followed  
95 the Global Burden of Disease study (GBD) 2019.[12, 13] The SDI, based on fertility,  
96 income per capita and educational attainment, was used as a composite indicator of  
97 the degree of health-related development at the national or regional level. The SDI  
98 value ranges from 0 to 1, and all the countries were classified into five SDI regions:  
99 low-, low-middle-, middle-, high-middle- and high-SDI regions, according to the SDI  
100 quintiles. Regions with a lower value indicated a lower degree of development  
101 associated with health outcomes. In addition, countries were divided into 21 regions  
102 according to geographical location. Age-standardized rates (ASRs) based on the  
103 updated standard population were also available in the GBD 2019, allowing the

104 analysis of CKD according to age structure and population size.

### 105 **Statistical analysis**

106 Numbers and ASDRs, and associated 95% uncertainty intervals (UIs) provided by  
107 GBD 2019, were analyzed to quantify the CKD-related death burden attributed to risk  
108 factors. Ninety-five percent UI values fell between the 2.5th and 97.5th percentiles of  
109 1000 samples that were extracted from the posterior distribution in the modeling  
110 process.[14] The time trend of an ASR over a specified time period was represented  
111 by the estimated annual percentage change (EAPC), which detailed calculation  
112 method has been reported in many previously published GBD studies.[15, 16] In  
113 brief, the natural logarithm of the ASR is assumed to be linear over time; therefore,  
114  $\ln(\text{ASR}) = \alpha + \beta \times (\text{calendar year}) + \text{error term}$ . The  $\text{EAPC} = 100 \times (\exp(\beta) - 1)$ , and the  
115 95% confidence interval (95% CI) can be obtained from the linear regression model.  
116 To assess the trends of data over time from 1990 to 2019, Joinpoint trend analyses  
117 were performed by fitting several different line segments on a logarithmic scale with  
118 the simplest model. Significant changes were identified by permutation tests and  
119 estimated by the Monte Carlo method. A *P* value less than 0.05 was used to denote to  
120 be statistical significance.

121 All statistical and graphical analyses were carried out using R version 4.1.2 (Vienna,  
122 Austria), Joinpoint software version 4.9.0.1 (National Cancer Institute, USA) and  
123 GraphPad Prism 8 (California, USA).

### 124 **Patient and Public Involvement**

125 Patients or the public were not involved in this study.

126

## 127 **RESULTS**

### 128 **1. Global burden of chronic kidney disease**

#### 129 *1.1 Changing trend of global CKD-related burden from 1990 to 2019*

130 Globally, there were an estimated 697.3 million CKD cases and 19.0 million incident  
131 cases in 2019, both of which were more than twice those in 1990 (supplementary  
132 table 1, supplementary table 2, supplementary figure 1a and supplementary figure 1b).  
133 The number of deaths caused by CKD doubled from 0.6 million (95% UI: 0.57-0.63  
134 million) in 1990 to 1.4 million (95% UI: 1.31-1.52 million) in 2019 (table 1; figure  
135 1a). Among all the causes of death, the percentage of deaths due to CKD doubled  
136 from 1.3% to 2.5%. The numbers of deaths caused by CKD increased from 19th in  
137 1990 to 11th in 2019 (supplementary figure 2a), and the ASDR increased from 15th to  
138 10th (supplementary figure 2b). Global disability-adjusted life-years (DALYs),  
139 consisted of years of life lost prematurely (YLLs) and years lived with disability  
140 (YLDs), also doubled from 21.5 million in 1990 to 41.5 million in 2019  
141 (supplementary table 3 and supplementary figure 1c). During this period, the age-  
142 standardized incidence rate (ASIR) increased over time, with an EAPC of 3.2 (95%  
143 CI: 3.11 to 3.19) (supplementary table 2, supplementary figure 3). The ASDR,  
144 DALYs, YLLs and YLDs showed upward trends in the first half of the study period  
145 but downward trends in the latter years according to the Joinpoint analyses (figure 1b

146 right, supplementary figure 3). These trends were consistent in both the male and  
147 female (supplementary figure 3).

148

149 **Table 1.** Death cases and age-standardized death rates of chronic kidney disease in 1990 and  
150 2019, and the temporal trends from 1990 to 2019.

|                             | 1990                                      |                                         | 2019                                      |                                            | 1990-2019                |
|-----------------------------|-------------------------------------------|-----------------------------------------|-------------------------------------------|--------------------------------------------|--------------------------|
| Characteristics             | Death cases ( $\times 10^3$ )<br>(95% UI) | ASDR per 100,000<br>population (95% UI) | Death cases ( $\times 10^3$ )<br>(95% UI) | ASDR per 100,000<br>population (95%<br>UI) | EAPC of ASDR<br>(95% CI) |
| Global                      | 601.31 (567.6-633.79)                     | 16.14 (15.13-17.13)                     | 1427.23 (1313.73-<br>1524.55)             | 18.29 (16.72-19.55)                        | 0.55 (0.46 to 0.64)      |
| <b>Gender</b>               |                                           |                                         |                                           |                                            |                          |
| Males                       | 313.94 (293.38-338.57)                    | 19.55 (18.19-21.18)                     | 741.38 (685.84-801.7)                     | 21.59 (19.93-23.27)                        | 0.55 (0.46 to 0.64)      |
| Females                     | 287.37 (268.8-305.44)                     | 13.89 (12.91-14.79)                     | 685.85 (614.92-741.57)                    | 15.8 (14.17-17.09)                         | 0.55 (0.46 to 0.64)      |
| <b>SDI regions</b>          |                                           |                                         |                                           |                                            |                          |
| Low                         | 62.02 (55.89-68.54)                       | 27.21 (24.08-30.65)                     | 125.07 (112.78-137.96)                    | 25.28 (22.9-27.68)                         | -0.27 (-0.31 to -0.22)   |
| Low-middle                  | 126.51 (114.96-138.84)                    | 21.9 (19.73-24.25)                      | 293.49 (265.9-320.13)                     | 22.95 (20.77-25.04)                        | 0.14 (0.01 to 0.26)      |
| Middle                      | 196.59 (183.72-209.89)                    | 21.01 (19.54-22.84)                     | 506.13 (464.49-547.47)                    | 22.8 (20.79-24.75)                         | 0.43 (0.36 to 0.5)       |
| High-middle                 | 116.33 (109.59-124.18)                    | 12.25 (11.42-13.2)                      | 227.99 (207.02-244.66)                    | 11.78 (10.65-12.65)                        | -0.08 (-0.22 to 0.06)    |
| High                        | 99.47 (92.56-103.08)                      | 9.61 (8.92-9.98)                        | 273.59 (236.92-294.76)                    | 12.58 (11.09-13.47)                        | 1.21 (1.09 to 1.32)      |
| <b>21 GBD regions</b>       |                                           |                                         |                                           |                                            |                          |
| Central Asia                | 5.04 (4.73-5.75)                          | 10.01 (9.33-11.63)                      | 10.38 (9.43-11.49)                        | 14.75 (13.48-16.17)                        | 1.11 (0.73 to 1.49)      |
| Central Europe              | 13.14 (12.7-13.56)                        | 9.62 (9.22-9.93)                        | 18.76 (16.33-21.22)                       | 8.61 (7.5-9.74)                            | -0.23 (-0.36 to -0.11)   |
| Eastern Europe              | 11.06 (10.74-11.35)                       | 4.41 (4.25-4.53)                        | 15.93 (14.23-17.56)                       | 4.85 (4.34-5.34)                           | -0.16 (-0.42 to 0.09)    |
| Australasia                 | 2.02 (1.85-2.14)                          | 9.27 (8.39-9.87)                        | 6.12 (5.14-6.85)                          | 10.77 (9.17-12)                            | 0.7 (0.62 to 0.78)       |
| High-income Asia<br>Pacific | 22.94 (21.27-23.86)                       | 13.12 (12.01-13.73)                     | 54.14 (42.82-60.58)                       | 9.13 (7.54-10.06)                          | -1.35 (-1.43 to -1.28)   |

151

|                              |                       |                     |                        |                     |                        |
|------------------------------|-----------------------|---------------------|------------------------|---------------------|------------------------|
| High-income North America    | 35.75 (32.89-37.2)    | 9.79 (9.03-10.18)   | 114.46 (102.38-122.48) | 16.88 (15.26-17.98) | 2.26 (2.07 to 2.45)    |
| Southern Latin America       | 8.99 (8.51-9.42)      | 20.79 (19.61-21.83) | 21.69 (19.81-23.33)    | 25.45 (23.27-27.34) | 0.72 (0.43 to 1.02)    |
| Western Europe               | 49.78 (46.2-51.89)    | 8.49 (7.86-8.87)    | 116.66 (99.12-126.16)  | 9.97 (8.58-10.73)   | 0.98 (0.86 to 1.1)     |
| Andean Latin America         | 5.24 (4.78-5.74)      | 25.51 (23.13-28.1)  | 19.38 (16.14-22.96)    | 35.68 (29.73-42.21) | 1.37 (1.07 to 1.67)    |
| Caribbean                    | 4.79 (4.47-5.28)      | 18.59 (17.28-20.52) | 12.66 (10.85-14.78)    | 24.58 (21.08-28.71) | 1.44 (1.31 to 1.58)    |
| Central Latin America        | 20.7 (19.77-21.36)    | 25.77 (24.22-26.76) | 111.71 (98.57-125.86)  | 48.11 (42.52-54.16) | 2.42 (2.09 to 2.74)    |
| Tropical Latin America       | 16.59 (15.87-17.14)   | 19.36 (18.16-20.14) | 44.22 (40.46-46.73)    | 18.96 (17.25-20.06) | 0.01 (-0.06 to 0.09)   |
| North Africa and Middle East | 52.6 (47.64-61.84)    | 34.74 (30.67-44.08) | 111.81 (96.42-130.85)  | 30.37 (26.34-35.39) | -0.43 (-0.51 to -0.34) |
| South Asia                   | 117.5 (100.02-134.35) | 22.21 (18.57-25.75) | 285.34 (248.21-324.6)  | 21.56 (18.82-24.36) | -0.3 (-0.51 to -0.08)  |
| East Asia                    | 104.32 (92.79-116.88) | 13.28 (11.9-14.75)  | 209.29 (179.98-237.7)  | 11.55 (9.99-13.05)  | -0.21 (-0.32 to -0.1)  |
| Oceania                      | 0.62 (0.53-0.72)      | 20.82 (18.22-23.98) | 1.6 (1.32-1.93)        | 23.8 (20.26-27.96)  | 0.31 (0.12 to 0.49)    |
| Southeast Asia               | 68.7 (63.3-74.86)     | 27.38 (24.96-30.14) | 153.37 (137.32-169.64) | 27.79 (24.63-30.68) | 0.06 (0 to 0.12)       |
| Central Sub-Saharan Africa   | 6.45 (5.47-7.54)      | 30.32 (25.81-34.98) | 12.36 (9.7-15.19)      | 25.87 (19.78-31.73) | -0.64 (-0.68 to -0.61) |
| Eastern Sub-Saharan Africa   | 21.64 (19.01-24.17)   | 29.43 (25.56-33.33) | 38.6 (34.23-43.26)     | 26.24 (23.43-29.23) | -0.5 (-0.55 to -0.46)  |
| Southern Sub-Saharan Africa  | 6.18 (5.58-7.05)      | 23.04 (20.68-26.41) | 16.27 (14.95-17.65)    | 32.44 (29.77-35.1)  | 1.31 (0.95 to 1.66)    |
| Western Sub-Saharan Africa   | 27.27 (23.36-32.18)   | 31.88 (27.56-37.76) | 52.47 (44.11-61.28)    | 29.35 (25.21-33.71) | -0.21 (-0.25 to -0.17) |

SDI: sociodemographic index; ASDR: age-standardized death rate; EAPC: estimated annual percentage change; UI: uncertainty interval; CI: confidence interval.

154

### 155 **1.2 Changing trend of CKD-related death burden in each SDI region**

156 Of the total DALYs caused by CKD, YLLs accounted for 78.9%, while YLDs  
 157 accounted for 21.1% in 2019. Therefore, we focused subsequent analyses mainly on  
 158 the CKD-related death burden. During the three decades, all five SDI regions showed  
 159 increases in the numbers of deaths over time (figure 1b left). Among them, the

1  
2  
3 160 middle-SDI region showed the highest death numbers, reaching 0.5 million, and the  
4 161 low-SDI region had the lowest, with 0.1 million, in 2019 (figure 1a and 1b left). The  
5 162 ASDR in the high-SDI region increased dramatically, with an EAPC of 1.2 (95% CI:  
6 163 1.09 to 1.32), and exceeded that of the high-middle-SDI from 2011 onward (figure 1b  
7 164 right). In contrast, the low-SDI region still had the highest ASDR in 2019, at 25.3 per  
8 165 100,000 population (95% UI: 22.90-27.68), although it had the most significant  
9 166 declining trend (EAPC: -0.27, 95% CI: -0.31 to -0.22) (figure 1b right). The ASDR  
10 167 was negatively correlated with SDI level worldwide ( $\rho = -0.603$ ,  $P < 0.0001$ , figure  
11 168 1c), while the ASIR was positively correlated with SDI level ( $\rho = 0.54$ ,  $P < 0.0001$ ,  
12 169 supplementary figure 4).

### 170 ***1.3 The ASDR increased in most regions and countries***

171 At the regional level, death numbers in all 21 regions and the ASDRs in most regions  
172 showed increasing trends during this period (figure 1d). At the country level, CKD-  
173 related deaths increased by more than 500% in the United Arab Emirates, Venezuela,  
174 Estonia, Armenia, El Salvador and Ecuador over the three-decade study period  
175 (supplementary table 4). India (0.22 [95% UI: 0.19-0.26] million) surpassed inland  
176 China (0.2 [95% UI: 0.17-0.23] million) to be the country with largest number of  
177 CKD-related deaths in 2019. The number of deaths in the United States of America  
178 (0.11 [95% UI: 0.10-0.11] million) was second to only those in India and China. The  
179 total number of deaths for these three countries accounted for 36.9% of the worldwide  
180 number of deaths in 2019 (figure 1e, supplementary figure 5). Nicaragua had the  
181 largest ASDR, at 80.2 (95% UI: 69.57-83.24) per 100,000 population (figure 1f,  
182 supplementary table 4). Estonia showed the fastest increase in the ASDR with an  
183 EAPC of 5.4 (95% CI: 4.91 to 5.81) during this period (figure 1g, supplementary table  
184 4). While Mongolia had the fastest decrease in the ASDR of CKD (EAPC: -3.6, 95%  
185 UI: -4.07 to -3.12) (figure 1g, supplementary table 4).

## 186 **2. The CKD-related death burden in males was higher than that in females in 187 relatively high SDI regions**

### 188 ***2.1 The CKD-related death burden was unbalanced between sexes at the SDI level***

189 Generally, the number of CKD-related deaths was larger in males than in females  
190 over the past 3 decades (figure 2a), both of which showed synchronous upward  
191 trends, with the ratio of female to male deaths changing from 0.915 in 1990 to 0.925  
192 in 2019 (Figure 2b). In the high-SDI region, the ratio remained above 1 during this  
193 period. In 2019, the high- and high-middle-SDI regions had higher female death  
194 burdens, with ratios of female deaths to male deaths of 1.1 and 1.0, respectively,  
195 while the ratios in low- and low-middle-SDI regions were 0.802 and 0.812, which  
196 were the lowest (figure 2b left). Similar to the number of deaths, the CKD-related  
197 ASDR in males was higher than that in females over this period. In 2019, the female  
198 to male ASDR ratios ranged from 0.6 to 0.8 in all the SDI regions (figure 2b right),  
199 suggesting that the CKD-related death burden was unbalanced between sexes.

### 200 ***2.2 The ASDR in males increased in most regions and countries***

201 At the regional level, the female to male deaths ratios in Eastern Europe was the



1  
2  
3 202 highest (1.3), and that in Oceania was the lowest (0.7) in 2019. Death cases of both  
4 203 sexes were mainly concentrated in Asia. Both male and female deaths in Latin  
5 204 America had the fastest increase over time. In contrast, female death numbers in  
6 205 Eastern Europe and male death numbers in Central Europe had the slowest increases  
7 206 (figure 2c, supplementary table 5). Unlike the number of deaths, the female to male  
8 207 ASDR ratios in most regions were less than 1.0, except in North Africa and Middle  
9 208 East (1.0). The ratio in Southern sub-Saharan Africa was the lowest, at 0.6  
10 209 (supplementary table 5).

11 210 At the country level, the numbers of male deaths in almost all the countries showed  
12 211 increasing trends, except in Slovakia and Poland. The death ratios in Estonia,  
13 212 Hungary, Latvia, Austria and Vietnam were over 1.5, which suggested that the CKD-  
14 213 related death burden was much higher in females than in males in these countries. In  
15 214 contrast, the ratio was less than 0.5 in Papua New Guinea and the United Arab  
16 215 Emirates, indicating a higher death burden in males (figure 2d, supplementary table  
17 216 6). The ASDRs in both females and males in Mongolia showed the largest decreases,  
18 217 with decreases of 43.2% in females and 57.1% in males.

### 218 **3. The age-related CKD-related death burden is more serious in high-SDI** 219 **regions**

#### 220 ***3.1 The numbers of CKD-related death increased with age in 2019***

221 In 2019, global CKD-related deaths were mainly distributed in middle-aged and  
222 elderly people over 50 years old, specifically 50-74 years old, who accounted for  
223 41.9% (figure 3a). Those aged 50-74 years had the largest death numbers in all the  
224 SDI regions except high-SDI region. In high-SDI region, the numbers of CKD-related  
225 death were increased with age, with the largest in 85 plus age group. The numbers of  
226 deaths in the 85 plus age group had the greatest increases in all SDI regions (figure  
227 3a). Those aged 0-9 years showed decreases in the numbers of deaths in all the SDI  
228 regions except the low-SDI region. Those aged 10-24 years had increased numbers of  
229 deaths in the low- and low-middle-SDI regions (figure 3b). Therefore, premature  
230 deaths were mainly concentrated in the relatively lower SDI regions in 2019.

#### 231 ***3.2 The changing trend of CKD-related death burden from 1990 to 2019 in each*** 232 ***SDI regions***

233 During this period, the age distribution of CKD-related deaths in the relatively young  
234 population, including the 0-9, 10-24 and 25-49, and 50-74 age groups, showed a  
235 declining trend (figure 3c). In contrast, deaths in elderly individuals, particularly those  
236 aged 85 years and older, showed an upward trend. Central Asia was the only region  
237 that saw a decline composition of 85 plus age group (figure 3c). As to SDI level, the  
238 proportion of deaths the 85 plus age group showed an upward trend with increasing  
239 SDI level, with the highest value of 58.2% in the Western Europe region in 2019.  
240 Eastern sub-Saharan Africa and Western sub-Saharan Africa, with lower SDI levels,  
241 had the highest proportions of the 10-24 and 0-9 age groups, respectively. The high-  
242 income Asia Pacific region had the largest increase in the proportion among the 85  
243 plus age group and the largest decrease among the 50-74 age group (figure 3c). These



244 results revealed that the CKD-related death burden gradually shifted to elderly  
245 individuals in higher SDI regions. In addition, the proportion of females increased  
246 with increasing age was found in the further analysis of sex compositions among  
247 different age groups (figure 3d).

#### 248 **4. CKD Burden attributable to risk factors**

##### 249 ***4.1 The main risk factors for death from CKD***

250 Globally, metabolic disorders (such as diabetes, obesity and hypertension) were the  
251 main risk factors for death from CKD. Over this period, the numbers of deaths due to  
252 CKD attributable to high systolic blood pressure (SBP), high fasting plasma glucose  
253 (FPG) and high body mass index (BMI) sharply increased (figure 4a), which were the  
254 main risk factors contributing to the ASDR of CKD, accounting for 62.0%, 33.6%  
255 and 27.2%, respectively in 2019. Even though the ASDR of CKD attributable to high  
256 BMI had the largest increase, at 77.1%, compared with 17.6% for high SBP and  
257 20.4% for high FPG, the ranks of these risk factors did not change (figure 4a).

##### 258 ***4.2 The high SBP-attributed ASDRs in all five SDI regions***

259 CKD attributable to high SBP was associated with the highest ASDRs in all the SDI  
260 regions over this period (figure 4a). In 2019, high SBP-attributed death rate in the  
261 low-SDI region was higher than in other SDI-regions (figure 4b), even though it  
262 showed the greatest reduction during the 30-year study period (decrease of 3.0%). The  
263 high SBP-attributed death rate in the high-SDI region saw the fastest increase (figure  
264 4b). In 2019, ASDR attributed to high SBP in the high-middle-SDI region was the  
265 lowest. At the regional level, the rank of the high SBP-attributed ASDR in Central  
266 Latin America increased from sixth in 1990 to first among all 21 regions in 2019, with  
267 the greatest increase.

##### 268 ***4.3 Other metabolic disorders factors for CKD-related ASDR in each SDI regions***

269 The highest FPG-attributed ASDRs were mainly concentrated in the low-middle and  
270 low-SDI regions during this period (figure 4b). In 2019, high FPG was the second  
271 most prevalent risk factor, followed by high BMI, in all regions except the high-SDI  
272 region (figure 4a, c). In contrast, BMI was ranked as the second most prevalent  
273 contributor, exceeding FPG, to the ASDR in the high-SDI region in 2019, even  
274 though the FPG-attributed death rate in this region showed a larger increase than  
275 those in other regions (figure 4b, c). In 2019, the FPG-attributed ASDR in the middle-  
276 SDI region was higher than those in the other SDI regions, while that in the high-  
277 middle-SDI region was the lowest (figure 4b). The BMI-attributed ASDR in the  
278 middle-SDI was the highest, while in the high-middle SDI, it was the lowest. It is  
279 worth noting that the BMI-attributed ASDRs in all five SDI regions had steeply  
280 increasing trends over this period (figure 4b). A diet high in sodium was the fourth-  
281 ranked contributor to the CKD ASDR in the high-middle-, middle- and low-middle-  
282 SDI regions and the fifth-ranked contributor in the high- and low-SDI regions (figure  
283 4a).

##### 284 ***4.4 The changing trends of ASDRs caused by high or low temperature in different areas***

1  
2  
3 286 Notably, although the high temperature-related death burden was low (figure 4c), the  
4 287 high temperature-attributed ASDRs increased steeply in the low-middle- and low-SDI  
5 288 regions over this period (figure 4b). These regions had the highest high temperature-  
6 289 attributed ASDRs in 2019 (figure 4c). In sharp contrast, the high temperature-  
7 290 attributed ASDRs in the high-middle- and high-SDI regions decreased by 7.6 and 6.6  
8 291 times, respectively, compared with those in 1990 (figure 4b). The high-middle-SDI  
9 292 region had the lowest high temperature-related death rate in 2019. At the regional  
10 293 level, East Asia, High-income North America, South Asia and Western Europe  
11 294 showed the fastest increases in the high temperature-attributed ASDRs, and South  
12 295 Asia had the highest high temperature-attributed death rate in 2019. Central Latin  
13 296 America and Southeast Asia had the fastest decreases in the high temperature-  
14 297 attributed ASDR. Tropical Latin America, Southern sub-Saharan Africa and Eastern  
15 298 sub-Saharan Africa had the lowest values. In addition, the risk factors of low  
16 299 temperature and lead exposure were much larger than those of high temperature, and  
17 300 low temperature exposure was the first of the three in high- and high-middle-SDI  
18 301 regions (figure 4a).

19 302

## 20 303 **DISCUSSION**

21 304 Despite advancements in scientific research that have led to a better understanding of  
22 305 the pathogenesis of diseases and significant improvements in disease management, no  
23 306 significant improvement was observed in the burden of CKD-related deaths, in  
24 307 contrast with other noncommunicable diseases. CKD is characterized by a gradual  
25 308 decline kidney function that eventually results in end-stage renal disease (ESRD),  
26 309 with little chance of reversal. CKD is therefore an important cause of morbidity and  
27 310 mortality among noncommunicable diseases.[17]

28 311 Our results showed significant regional variations in the CKD-related death burdens.  
29 312 The ASDR of CKD was associated with SDI, with higher CKD ASDRs in lower SDI  
30 313 regions. This may be related to a lack of effective health interventions caused by  
31 314 inadequate health care funding and weak health systems in lower SDI regions.[18] If  
32 315 these trends continue, differences in the CKD death burden among regions will  
33 316 increase further. In terms of geographical regions and countries, the CKD death  
34 317 burden in Mesoamerica (especially Nicaragua, El Salvador and Mexico) was more  
35 318 serious than those in other geographical locations. This may be due to the  
36 319 megathermal climate or the rates of diabetes and hypertension, which are major risk  
37 320 factors globally.[19] A recent study revealed that agricultural workers who currently  
38 321 or used to work in the sugarcane industry may be at high-risk of CKD.[19, 20] In  
39 322 addition, climate change in this region may be a risk factor for CKD-related  
40 323 death.[21] These findings call for increased government planning and interventions  
41 324 and the development of new and more appropriate solutions to address the CKD death  
42 325 burden in this area.

43 326 Globally, the number of CKD-related deaths and ASDR were larger and higher in  
44 327 males than in females, although the difference appearing to be slightly decreasing

1  
2  
3 328 trend recent years. It is worth noting that the sex ratio of deaths in the high-SDI region  
4 329 remained above 1 during the study period, but the ASDR ratio did not, which may be  
5 330 attributed to the increase in the population and the aging of the population in this  
6 331 region, especially among females. In contrast, the sex ratio of the ASDR was higher  
7 332 than the ratio of deaths in several countries in the Middle East, such as Egypt (1.60 vs.  
8 333 1.13 in Egypt). This result coincided with the lower disability-free life expectancy  
9 334 among females total lifetime in this region.[22]

10 335 Over the past 30 years, the age distribution of CKD-related deaths showed a gradual  
11 336 increasing trend with age, and people in the middle-aged and elderly groups (> 50  
12 337 years old) accounted for the main proportion of CKD deaths. This trend may be  
13 338 closely related to improvements in health care as well as population aging worldwide.  
14 339 However, in regions with relatively low SDIs, such as Africa, premature deaths are  
15 340 still prevalent, with increasing numbers, which may be explained by the low levels of  
16 341 medical and health care in these regions. Patients diagnosed with CKD may not  
17 342 receive timely and adequate medical care to slow the progression of renal  
18 343 deterioration, resulting in premature death, which reflects the impact of  
19 344 socioeconomic development on premature CKD-related deaths.[23] Therefore, policy  
20 345 makers and the health care sector in these regions should implement urgent measures  
21 346 to reverse this negative trend.

22 347 The most cost-effective strategy to reduce the number of CKD-related deaths is  
23 348 preventing the onset of CKD.[24] Therefore, screening high-risk groups and  
24 349 developing interventions targeting a variety of risk factors are the most effective  
25 350 approaches.[24, 25] High SBP, FPG and BMI were the main risk factors for CKD-  
26 351 related death.[1, 7, 26] Hence, implementing measures to improve blood pressure,  
27 352 plasma glucose and body weight is critical for reducing the CKD burden.[27]  
28 353 Although the CKD-related death burden attributed to high temperature exposure was  
29 354 low, the rapid upward trend, especially in the low- and low-middle-SDI regions,  
30 355 should be noted. In contrast, this burden in the high- and high-middle-SDI regions  
31 356 tended to remain stable or even decreased. Some studies recently reported large  
32 357 numbers of young sugarcane workers with end-stage of CKD, who did not have any  
33 358 known risk factors for CKD, such as high blood pressure or diabetes before.[19]  
34 359 Subsequent reports found that CKD of unknown origin also occurred in people who  
35 360 worked in agriculture or construction in other low-socioeconomic areas.[28] It has  
36 361 already been the leading cause of hospitalization and death among CKD patients in  
37 362 Central America.[29] Even though the exact pathogenesis of CKD in these individuals  
38 363 is currently unknown, it is undoubtedly related to heat exposure and dehydration  
39 364 caused by rapidly changing environmental conditions.[28, 30, 31] Compared with the  
40 365 higher SDI regions, the ability to provide health care and adapt to climate change in  
41 366 relative lower regions were limited; therefore, the situation is severely affected by  
42 367 high temperature exposure and is getting worse.[31] Local governments should  
43 368 formulate effective measures to cope with the high-temperature environment and  
44 369 formulate strategies to mitigate climate change. Moreover, cooperation among

1  
2  
3 370 clinicians, public health personnel, government agencies and medical researchers  
4 371 should be promoted to raise public awareness of CKD, actively explore the specific  
5 372 mechanism of the influence of high temperature exposure on CKD and minimize the  
6 373 adverse effects of climate change on kidney health.

7 374 Additionally, it has been shown that the association between cold exposure promoting  
8 375 CKD-related hospital visits is stronger than at moderate and high temperatures.[32]  
9 376 And acute cold exposure can lead to a significant increase in arterial blood pressure in  
10 377 patients with or without comorbid CKD.[33] Therefore, avoiding acute cold exposure  
11 378 and enhancing warmth measures in cold exposure are particularly important.  
12 379 Environmental lead exposure increases the risk of CKD.[34, 35] Due to the  
13 380 prevalence of lead in the environment, human exposure to this metal is almost  
14 381 inevitable. Therefore, public measures to reduce environmental contamination and  
15 382 reduce the food chain transfer of lead are essential, as are measures to reduce risk by  
16 383 setting maximum allowable concentrations of lead in staple foods at the lowest  
17 384 achievable levels.

### 385 **Limitations**

386 The GBD database provides extensive data and estimates of risk factors for the global  
387 burden of CKD, but there are some limitations, which have been detailed in many  
388 previously published studies.[13] First, more detailed information about the included  
389 countries and regions could not be obtained from the GBD database. In some  
390 countries with large territory spans or with multinational populations, the impact of  
391 regional and ethnic differences within countries on the global burden of CKD could  
392 not be further analyzed. In addition, the CKD burden may be underestimated in less  
393 developed countries and areas due to limited access to health care. Moreover, data on  
394 the impact of metabolic factors other than blood pressure and blood glucose, such as  
395 triglycerides, cholesterol or uric acid, on the global burden of CKD are lacking.

### 396 **CONCLUSIONS**

397 In summary, CKD remains a critical global public health concern. CKD-related  
398 deaths continue to increase, with the majority now occurring in elderly adults, mainly  
399 due to the increase in and the aging of the global population. However, the numbers  
400 of premature deaths in regions with low-SDI levels remain high, and the trend is  
401 increasing. In addition, the burden of CKD-related deaths is more severe in males  
402 than in females, though this difference is likely to narrow over time. Hypertension,  
403 diabetes and obesity remain critical risk factors for CKD. Moreover, in the low-SDI  
404 region, the rapidly increasing number of CKD-related deaths attributed to high  
405 temperature exposure should not be ignored, and national-level measures should be  
406 taken to reverse this trend.

### 407 **Acknowledgments**

408 Authors appreciate all the collaborators involved in the GBD study 2019.

### 409 **Competing interests**

410 No competing interests to declare.

### 411 **Contributors**

1  
2  
3 412 The idea and conceptual design: YL and XS; Data acquisition: ZC and NH; Literature  
4 413 retrieval and data collation: XL and XF; Data analysis: ZC and JL; Visualization: XL  
5 414 and YL; Preparation of the original draft: ZC and NH; Manuscript editing and  
6 415 revising: YL, XF and XS. Authors confirm that all of them have full access to all the  
7 416 data of the present study and are responsible for submitting for publication.

9 417 **Funding**

10 418 This work was supported by the National Natural Science Foundation of China (Grant  
11 419 No. 82000755) and the Nature Science Foundation of Shandong Province (Grant No.  
12 420 ZR2020QH086).

13 421 **Ethics approval**

14 422 Not applicable. Data of this study was publicly available and no patient and animal  
15 423 was involved.

16 424 **Data sharing statement**

17 425 Data are available in a public, open access repository. Data used from the online  
18 426 database the Global Health Data Exchange (GHDx) query tool  
19 427 (<http://ghdx.healthdata.org/gbd-results-tool>).[11]  
20 428



429 **REFERENCES**

- 430 1 Collaboration GCKD. Global, regional, and national burden of chronic  
431 kidney disease, 1990–2017: a systematic analysis for the Global  
432 Burden of Disease Study 2017. *Lancet* 2020;395:709–33. doi:  
433 10.1016/s0140-6736(20)30045-3
- 434 2 Hockham C, Schanschieff F, Woodward M. Sex Differences in CKD-  
435 Associated Mortality From 1990 to 2019: Data From the Global Burden  
436 of Disease Study. *Kidney Medicine* 2022;4doi:  
437 10.1016/j.xkme.2022.100535
- 438 3 Levey AS, Atkins R, Coresh J, et al. Chronic kidney disease as a  
439 global public health problem: approaches and initiatives - a position  
440 statement from Kidney Disease Improving Global Outcomes. *Kidney Int*  
441 2007;72:247–59. doi: 10.1038/sj.ki.5002343
- 442 4 Dai H, Alsalhe TA, Chalghaf N, et al. The global burden of disease  
443 attributable to high body mass index in 195 countries and territories,  
444 1990–2017: An analysis of the Global Burden of Disease Study.  
445 2020;17:e1003198. doi: 10.1371/journal.pmed.1003198
- 446 5 Kovács N, Nagy A, Dombrádi V, et al. Inequalities in the Global  
447 Burden of Chronic Kidney Disease Due to Type 2 Diabetes Mellitus:  
448 An Analysis of Trends from 1990 to 2019. 2021;18doi:  
449 10.3390/ijerph18094723
- 450 6 Campbell JR, Johnston JC, Ronald LA, et al. Screening for Latent  
451 Tuberculosis Infection in Migrants With CKD: A Cost-effectiveness  
452 Analysis. *Am J Kidney Dis* 2019;73:39–50. doi:  
453 10.1053/j.ajkd.2018.07.014
- 454 7 Chen A, Zou M, Young CA, et al. Disease Burden of Chronic Kidney  
455 Disease Due to Hypertension From 1990 to 2019: A Global Analysis.  
456 *Front Med (Lausanne)* 2021;8:690487. doi: 10.3389/fmed.2021.690487
- 457 8 Xie Y, Bowe B, Mokdad AH, et al. Analysis of the Global Burden of  
458 Disease study highlights the global, regional, and national  
459 trends of chronic kidney disease epidemiology from 1990 to 2016.  
460 *Kidney Int* 2018;94:567–81. doi: 10.1016/j.kint.2018.04.011
- 461 9 Norhammar A, Bodegard J, Eriksson JW, et al. Cost of healthcare  
462 utilization associated with incident cardiovascular and renal  
463 disease in individuals with type 2 diabetes: a multinational,  
464 observational study across 12 countries. 2022doi: 10.1111/dom.14698
- 465 10 Garofalo C, Borrelli S, Provenzano M, et al. Dietary Salt  
466 Restriction in Chronic Kidney Disease: A Meta-Analysis of  
467 Randomized Clinical Trials. 2018;10doi: 10.3390/nu10060732
- 468 [dataset]11 Collaboration GCKD. Data from the online database the  
469 Global Health Data Exchange (GHDx) query tool. Global Health Data

- 1  
2  
3 470 Exchange. December 31, 2019. [http://ghdx.healthdata.org/gbd-](http://ghdx.healthdata.org/gbd-results-tool)  
4 471 [results-tool](http://ghdx.healthdata.org/gbd-results-tool)  
5  
6 472 12 Global burden of 369 diseases and injuries in 204 countries and  
7 473 territories, 1990–2019: a systematic analysis for the Global Burden  
8 474 of Disease Study 2019. *Lancet* 2020;396:1204–22. doi: 10.1016/s0140-  
9 475 6736(20)30925–9  
10  
11 476 13 Global burden of 87 risk factors in 204 countries and territories,  
12 477 1990–2019: a systematic analysis for the Global Burden of Disease  
13 478 Study 2019. *Lancet* 2020;396:1223–49. doi: 10.1016/s0140-  
14 479 6736(20)30752–2  
15  
16 480 14 Global age-sex-specific fertility, mortality, healthy life  
17 481 expectancy (HALE), and population estimates in 204 countries and  
18 482 territories, 1950–2019: a comprehensive demographic analysis for  
19 483 the Global Burden of Disease Study 2019. *Lancet* 2020;396:1160–203.  
20 484 doi: 10.1016/s0140–6736(20)30977–6  
21  
22 485 15 Liu Z, Jiang Y, Yuan H, et al. The trends in incidence of primary  
23 486 liver cancer caused by specific etiologies: Results from the Global  
24 487 Burden of Disease Study 2016 and implications for liver cancer  
25 488 prevention. *J Hepatol* 2019;70:674–83. doi:  
26 489 10.1016/j.jhep.2018.12.001  
27  
28 490 16 Wang W, Hu M, Liu H, et al. Global Burden of Disease Study 2019  
29 491 suggests that metabolic risk factors are the leading drivers of the  
30 492 burden of ischemic heart disease. *Cell Metab* 2021;33:1943–56. e2.  
31 493 doi: 10.1016/j.cmet.2021.08.005  
32  
33 494 17 Stanifer JW, Von Isenburg M, Chertow GM, et al. Chronic kidney  
34 495 disease care models in low- and middle-income countries: a  
35 496 systematic review. *BMJ Glob Health* 2018;3:e000728. doi:  
36 497 10.1136/bmjgh-2018-000728  
37  
38 498 18 Ameh OI, Ekrikpo UE, Kengne AP. Preventing CKD in Low- and Middle-  
39 499 Income Countries: A Call for Urgent Action. *Kidney Int Rep*  
40 500 2020;5:255–62. doi: 10.1016/j.ekir.2019.12.013  
41  
42 501 19 Ferguson R, Leatherman S, Fiore M, et al. Prevalence and Risk  
43 502 Factors for CKD in the General Population of Southwestern Nicaragua.  
44 503 *J Am Soc Nephrol* 2020;31:1585–93. doi: 10.1681/asn.2019050521  
45  
46 504 20 Hansson E, Mansourian A, Farnaghi M, et al. An ecological study of  
47 505 chronic kidney disease in five Mesoamerican countries: associations  
48 506 with crop and heat. *BMC Public Health* 2021;21:840. doi:  
49 507 10.1186/s12889-021-10822-9  
50  
51 508 21 Sasai F, Roncal-Jimenez C, Rogers K, et al. Climate Change and  
52 509 Nephrology. *Nephrol Dial Transplant* 2021doi: 10.1093/ndt/gfab258  
53  
54 510 22 Metwally S. Disability-free life expectancy at old ages in Egypt.  
55 511 *J Biosoc Sci* 2021;53:290–304. doi: 10.1017/s0021932020000218  
56  
57  
58  
59  
60

- 1  
2  
3 512 23 Bello AK, Levin A, Tonelli M, et al. Assessment of Global Kidney  
4 513 Health Care Status. *Jama* 2017;317:1864–81. doi:  
5 514 10.1001/jama.2017.4046  
6  
7 515 24 Komenda P, Ferguson TW, Macdonald K, et al. Cost-effectiveness of  
8 516 primary screening for CKD: a systematic review. *Am J Kidney Dis*  
9 517 2014;63:789–97. doi: 10.1053/j.ajkd.2013.12.012  
10  
11 518 25 Cardiovascular disease, chronic kidney disease, and diabetes  
12 519 mortality burden of cardiometabolic risk factors from 1980 to 2010:  
13 520 a comparative risk assessment. *Lancet Diabetes Endocrinol*  
14 521 2014;2:634–47. doi: 10.1016/s2213–8587(14)70102–0  
15  
16 522 26 Li H, Lu W, Wang A, et al. Changing epidemiology of chronic kidney  
17 523 disease as a result of type 2 diabetes mellitus from 1990 to 2017:  
18 524 Estimates from Global Burden of Disease 2017. *J Diabetes Investig*  
19 525 2021;12:346–56. doi: 10.1111/jdi.13355  
20  
21 526 27 Ene-Iordache B, Perico N, Bikbov B, et al. Chronic kidney disease  
22 527 and cardiovascular risk in six regions of the world (ISN-KDDC): a  
23 528 cross-sectional study. *Lancet Glob Health* 2016;4:e307–19. doi:  
24 529 10.1016/s2214–109x(16)00071–1  
25  
26 530 28 Johnson RJ, Wesseling C, Newman LS. Chronic Kidney Disease of  
27 531 Unknown Cause in Agricultural Communities. *N Engl J Med*  
28 532 2019;380:1843–52. doi: 10.1056/NEJMra1813869  
29  
30 533 29 Sorensen C, Garcia-Trabanino R. A New Era of Climate Medicine –  
31 534 Addressing Heat-Triggered Renal Disease. *N Engl J Med* 2019;381:693–  
32 535 96. doi: 10.1056/NEJMp1907859  
33  
34 536 30 Harries AD. Chronic kidney disease, tuberculosis and climate change.  
35 537 *Int J Tuberc Lung Dis* 2020;24:132–33. doi: 10.5588/ijtld.19.0556  
36  
37 538 31 Borg MA, Bi P. The impact of climate change on kidney health. *Nat*  
38 539 *Rev Nephrol* 2021;17:294–95. doi: 10.1038/s41581–020–00365–4  
39  
40 540 32 Wu J, Ye Q, Fang L, et al. Short-term association of NO<sub>2</sub> with  
41 541 hospital visits for chronic kidney disease and effect modification  
42 542 by temperature in Hefei, China: A time series study. *Ecotoxicol*  
43 543 *Environ Saf* 2022;237:113505. doi: 10.1016/j.ecoenv.2022.113505  
44  
45 544 33 Masajtis-Zagajewska A, Pawlowicz E, Nowicki M. Effect of Short-Term  
46 545 Cold Exposure on Central Aortic Blood Pressure in Patients with  
47 546 CKD. *Nephron* 2021;145:20–26. doi: 10.1159/000510365  
48  
49 547 34 Navas-Acien A, Tellez-Plaza M, Guallar E, et al. Blood cadmium and  
50 548 lead and chronic kidney disease in US adults: a joint analysis. *Am*  
51 549 *J Epidemiol* 2009;170:1156–64. doi: 10.1093/aje/kwp248  
52  
53 550 35 Ekong EB, Jaar BG, Weaver VM. Lead-related nephrotoxicity: a review  
54 551 of the epidemiologic evidence. *Kidney Int* 2006;70:2074–84. doi:  
55 552 10.1038/sj.ki.5001809  
56  
57 553  
58  
59  
60



1  
2  
3 554 **Figure legends**  
4  
5

6 555 **figure 1.** Global death cases and death rate of CKD from 1990 to 2019. (A) Death  
7 556 cases in global and SDI areas in 1990 and 2019. (B) Death cases and ASDRs in global  
8 557 and SDI areas from 1990 to 2019. (C) Relationship between ASDRs and SDI from  
9 558 1990 to 2019. (D) Death cases and ASDRs in 21 geographic regions from 1990 to  
10 559 2019. (E) Death cases in 204 countries and territories in 2019. (F) The ASDRs in 204  
11 560 countries and territories in 1990 and 2019. (G) The EAPCs of ASDRs in 204  
12 561 countries and territories from 1990 to 2019. ASDR, age-standardized death rate (per  
13 562 100,000 population).

14  
15  
16  
17 563 **figure 2.** Sex differences and trends of CKD deaths and ASDR from 1990 to 2019.  
18 564 (A) The ASDRs in males and females globally from 1990 to 2019. (B) Death cases  
19 565 ratio between females to males (left) and ASDR ratio between females to males  
20 566 (right), in global and SDI areas in 1990 and 2019. (C) Gender composition of death  
21 567 cases and ASDR in global and SDI areas in 1990 and 2019. (D) Death cases ratio  
22 568 between females to males (left) and ASDR ratio between females to males (right) in  
23 569 204 countries and territories in 2019. ASDR, age-standardized death rate (per 100,000  
24 570 population).

25  
26  
27  
28  
29 571 **figure 3.** The distribution of CKD death cases and rates in age groups, SDI areas and  
30 572 21 geographic regions from 1990 to 2019. (A) Death cases in age groups in global and  
31 573 SDI areas from 1990 to 2019. (B) The change percentage of death cases (right) and  
32 574 rate (left) in age groups from 1990 to 2019. (C) Six age groups as percentages of total  
33 575 deaths in global, SDI areas and 21 geographic regions in 1990 and 2019. (D) Gender  
34 576 composition of death in global and SDI areas in 2019.

35  
36  
37  
38 577 **figure 4.** Predominant contribution of risk factors to CKD-related deaths in global and  
39 578 SDI areas. (A) Death cases and ASDRs attributed to main risk factors by SDI region  
40 579 from 1990 to 2019. (B) The ASDRs trends in SDI regions attributed to each main risk  
41 580 factor. (C) Proportions of deaths in global and SDI regions attributed to each risk  
42 581 factors in 2019. ASDR, age-standardized death rate (per 100,000 population).

43  
44  
45  
46 582  
47  
48  
49  
50  
51  
52  
53  
54  
55  
56  
57  
58  
59  
60



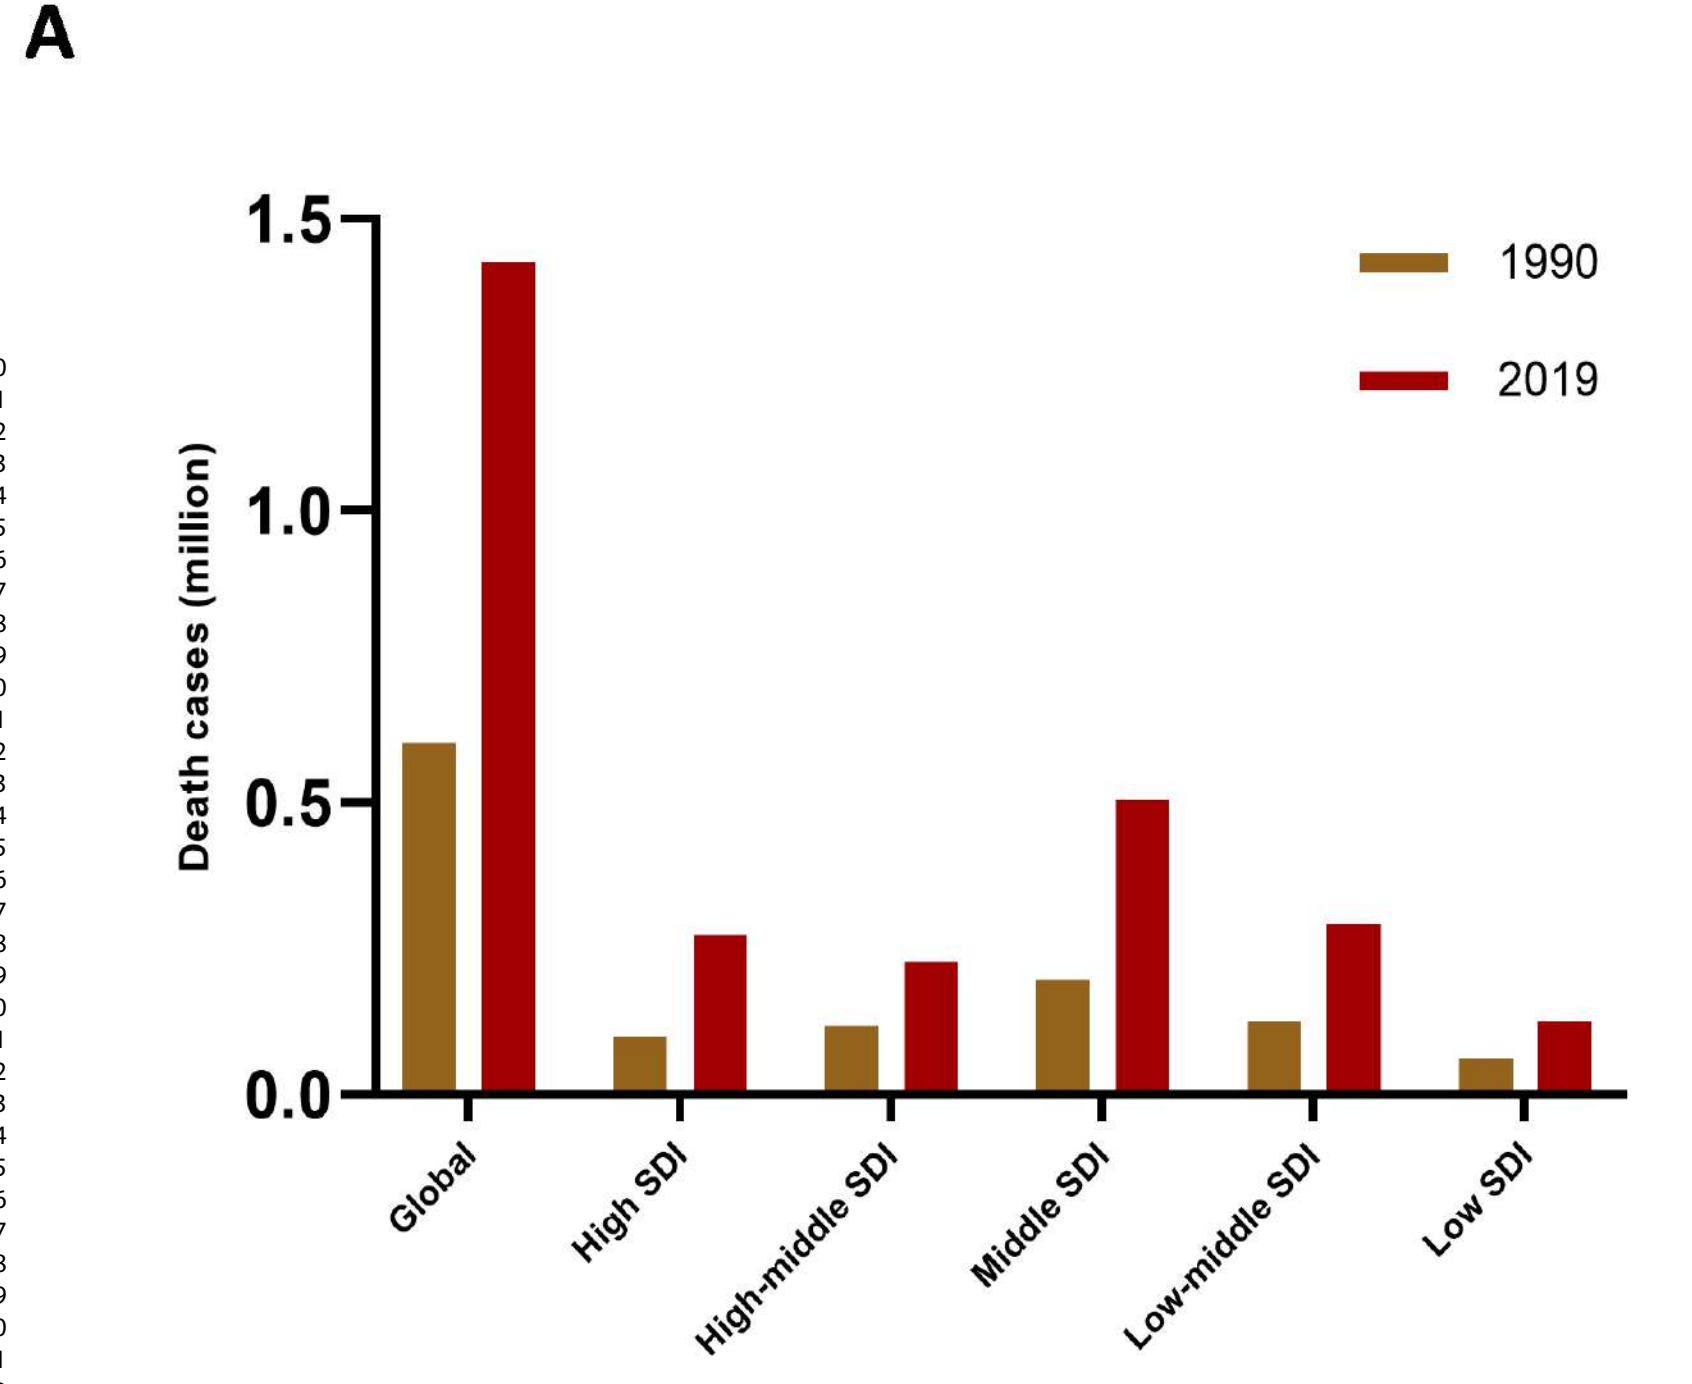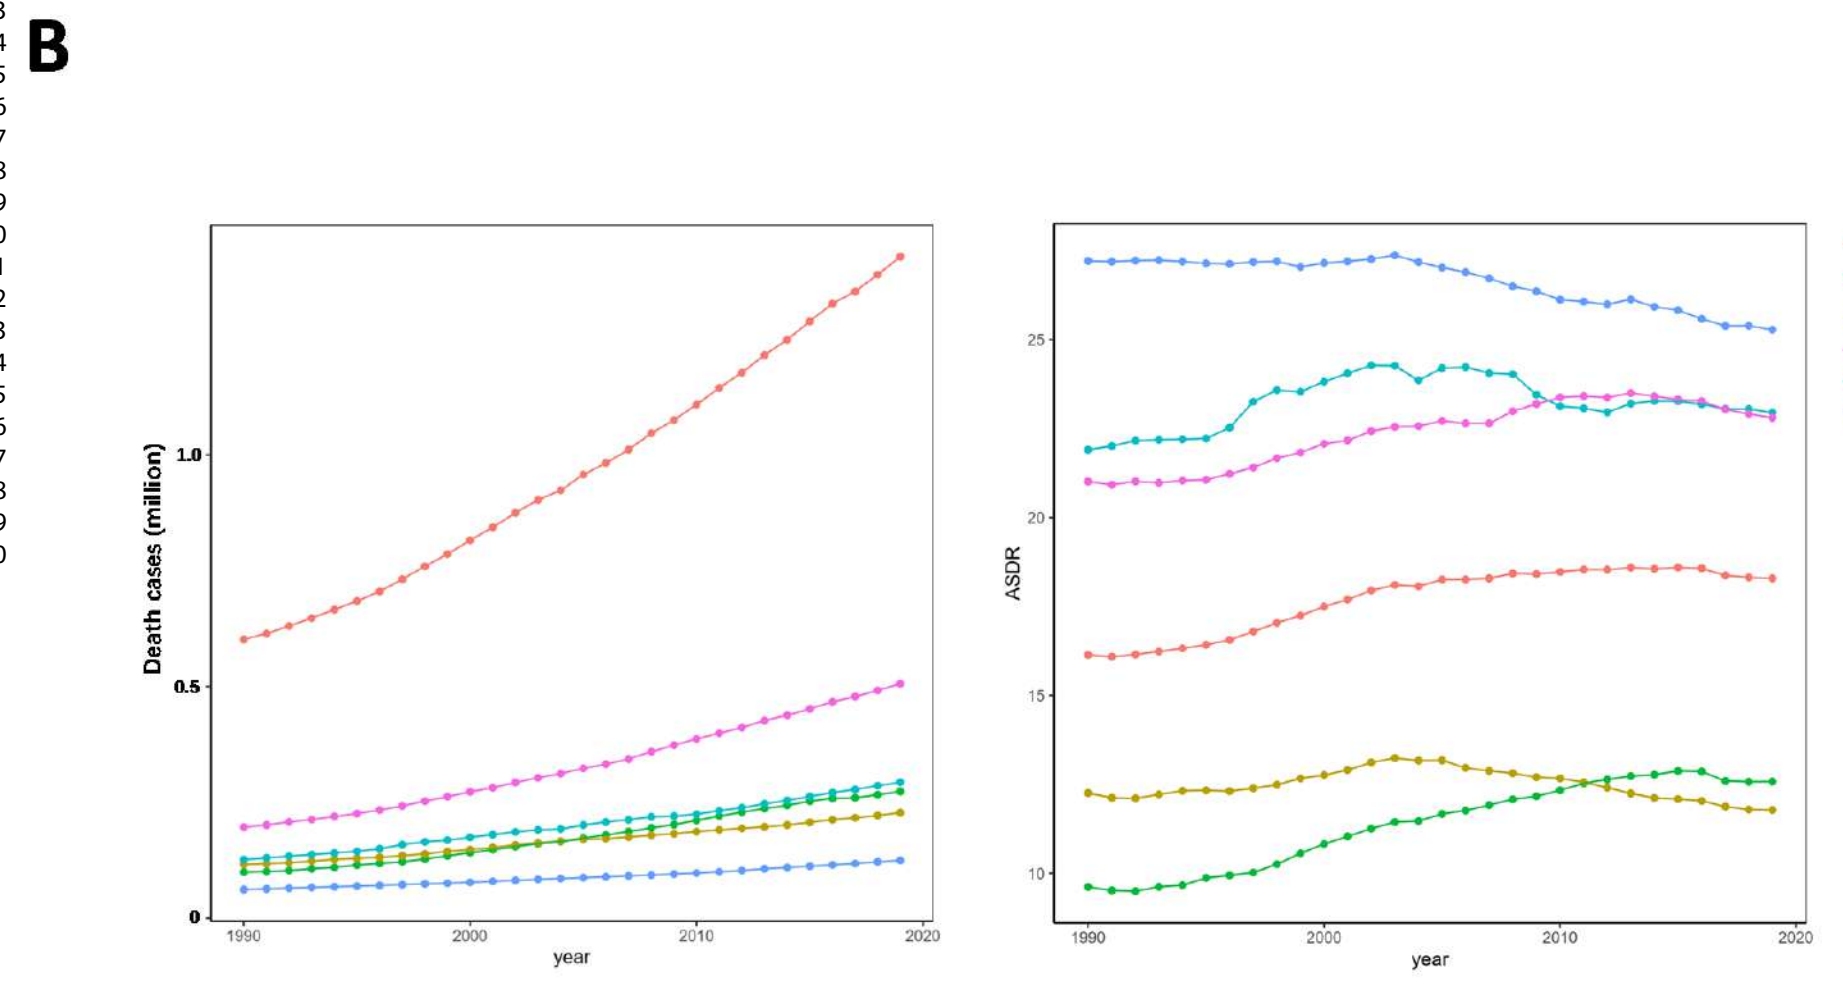



**A**

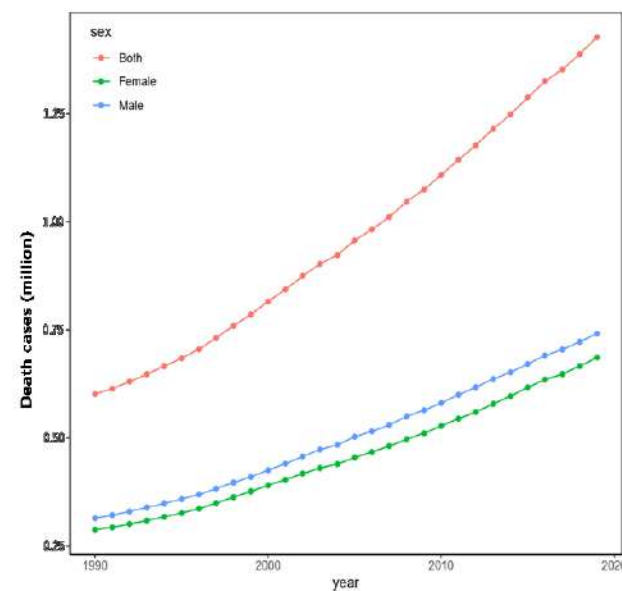

**B**

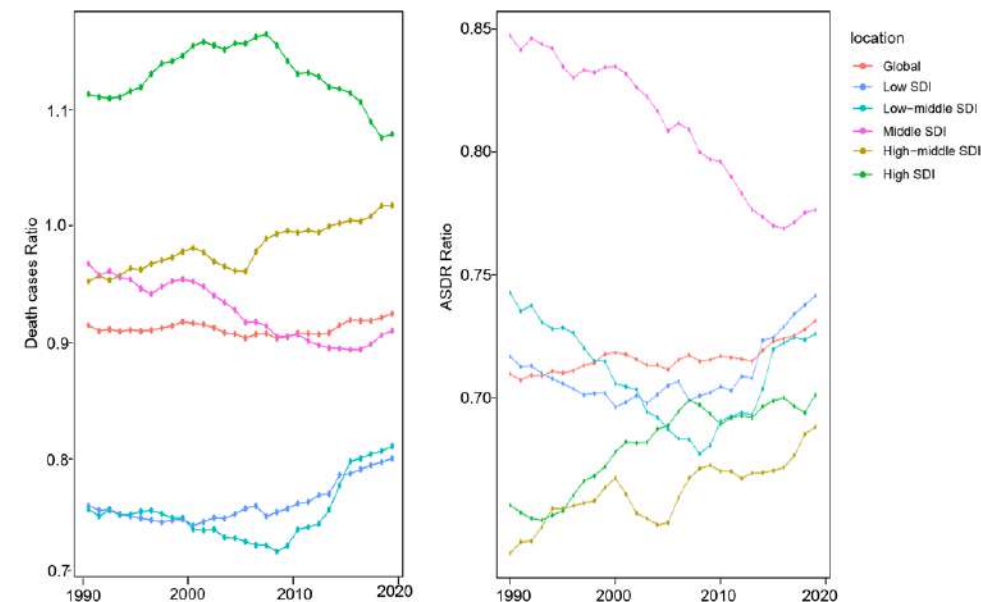

**C**

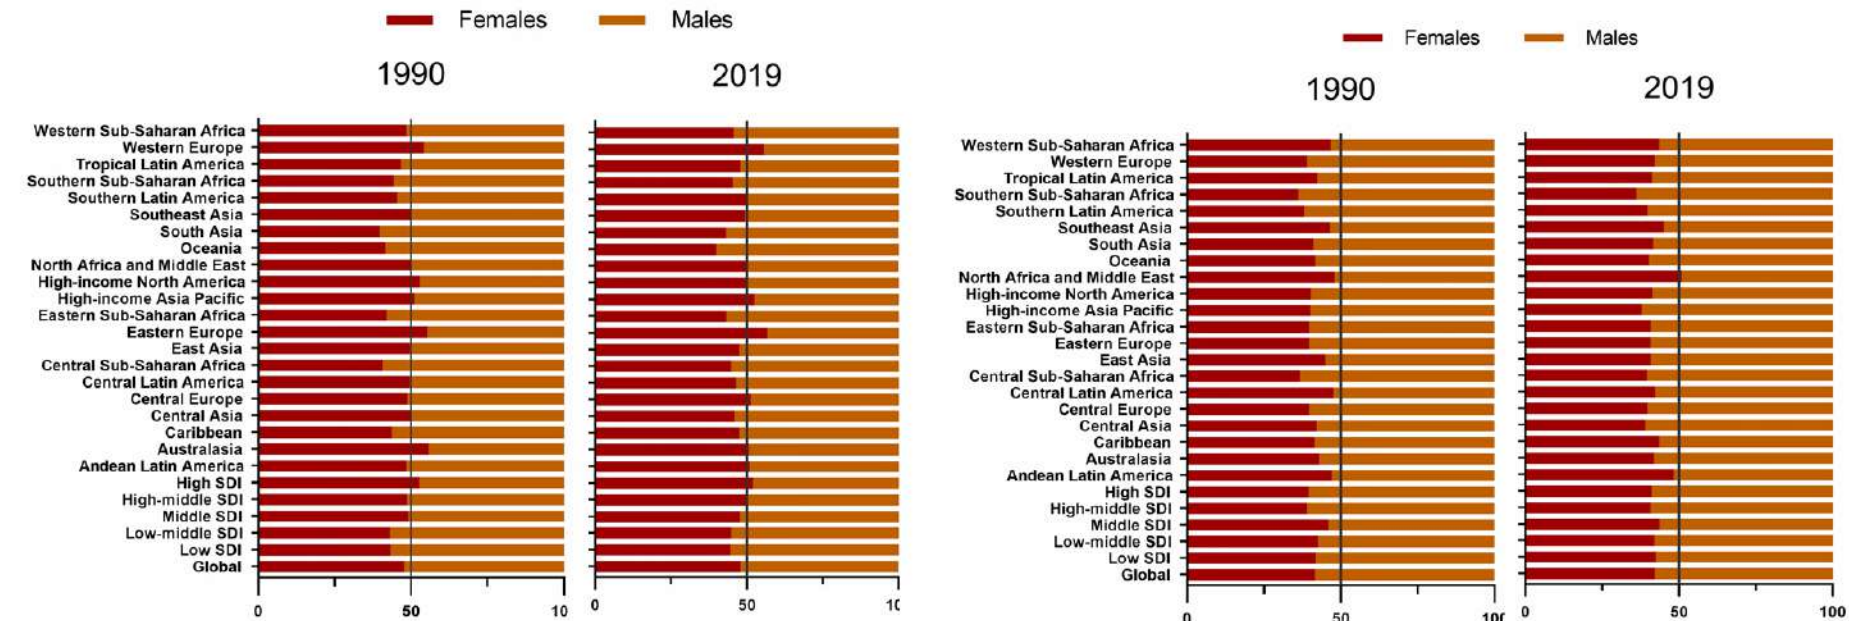

**D**

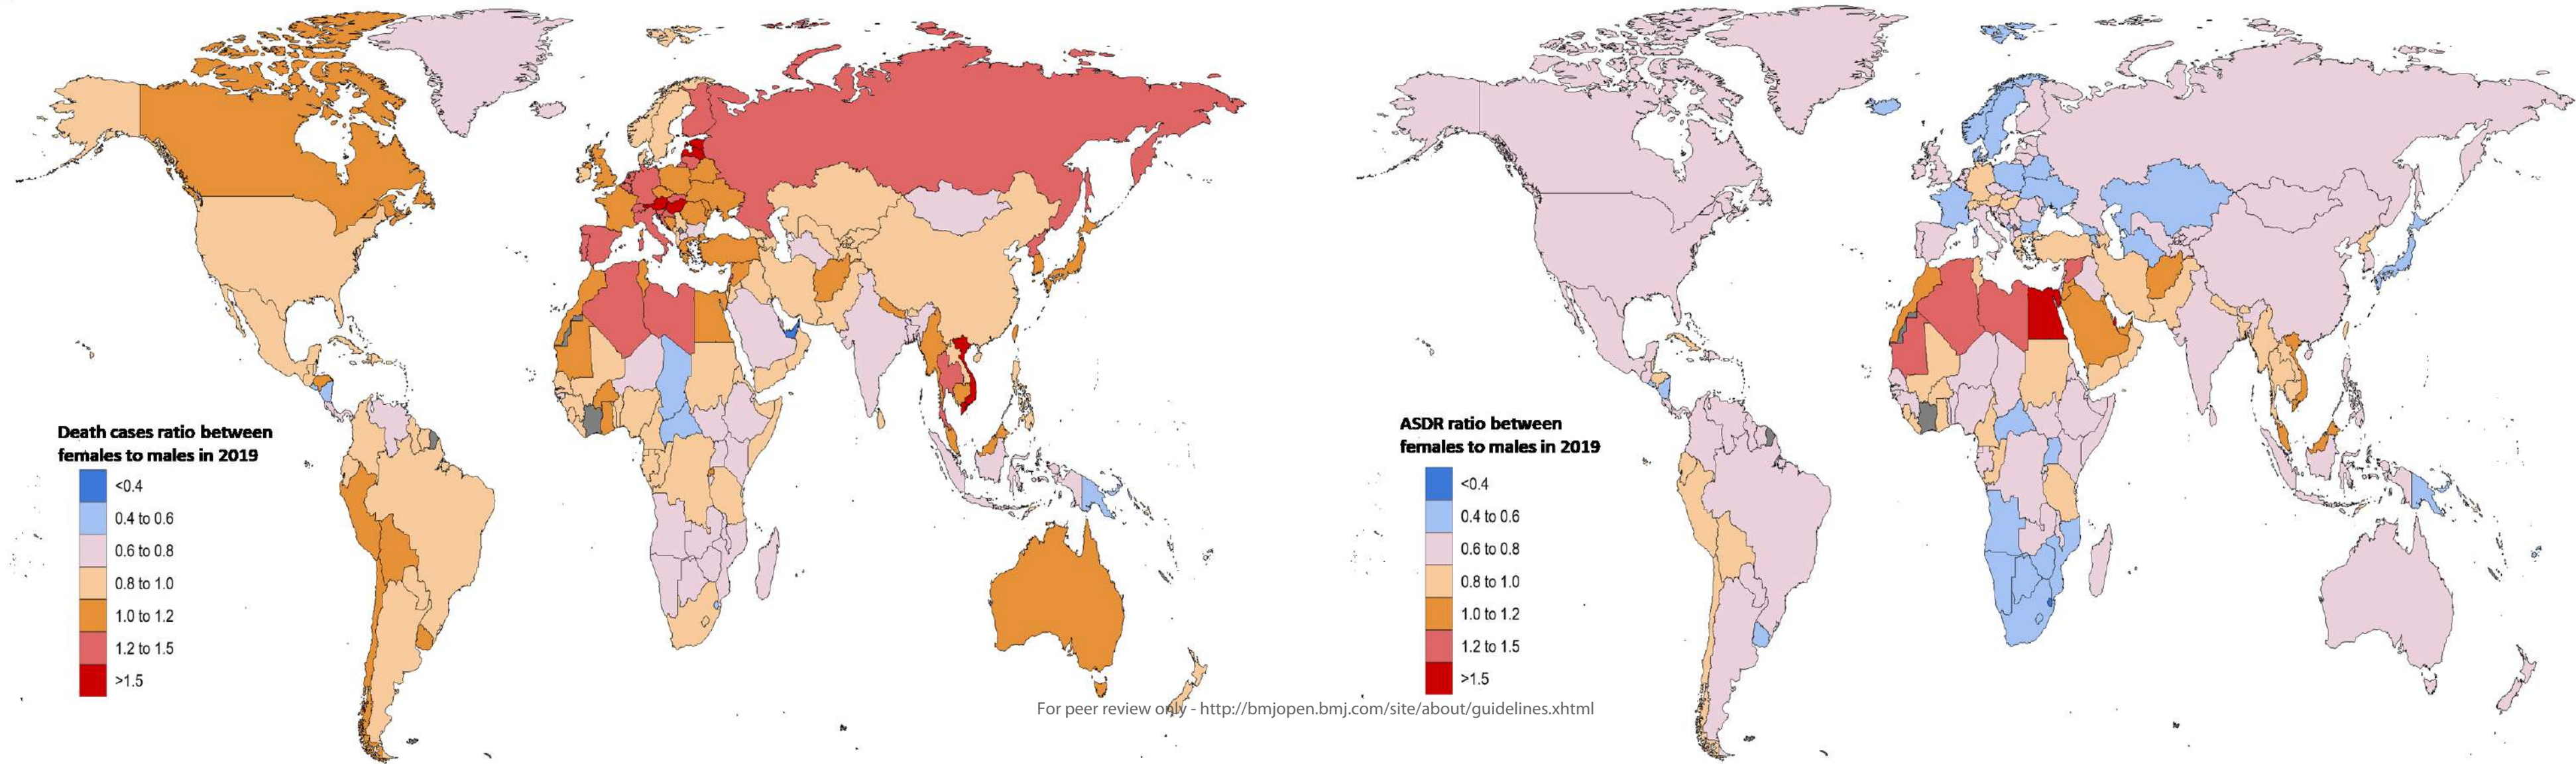



**A**

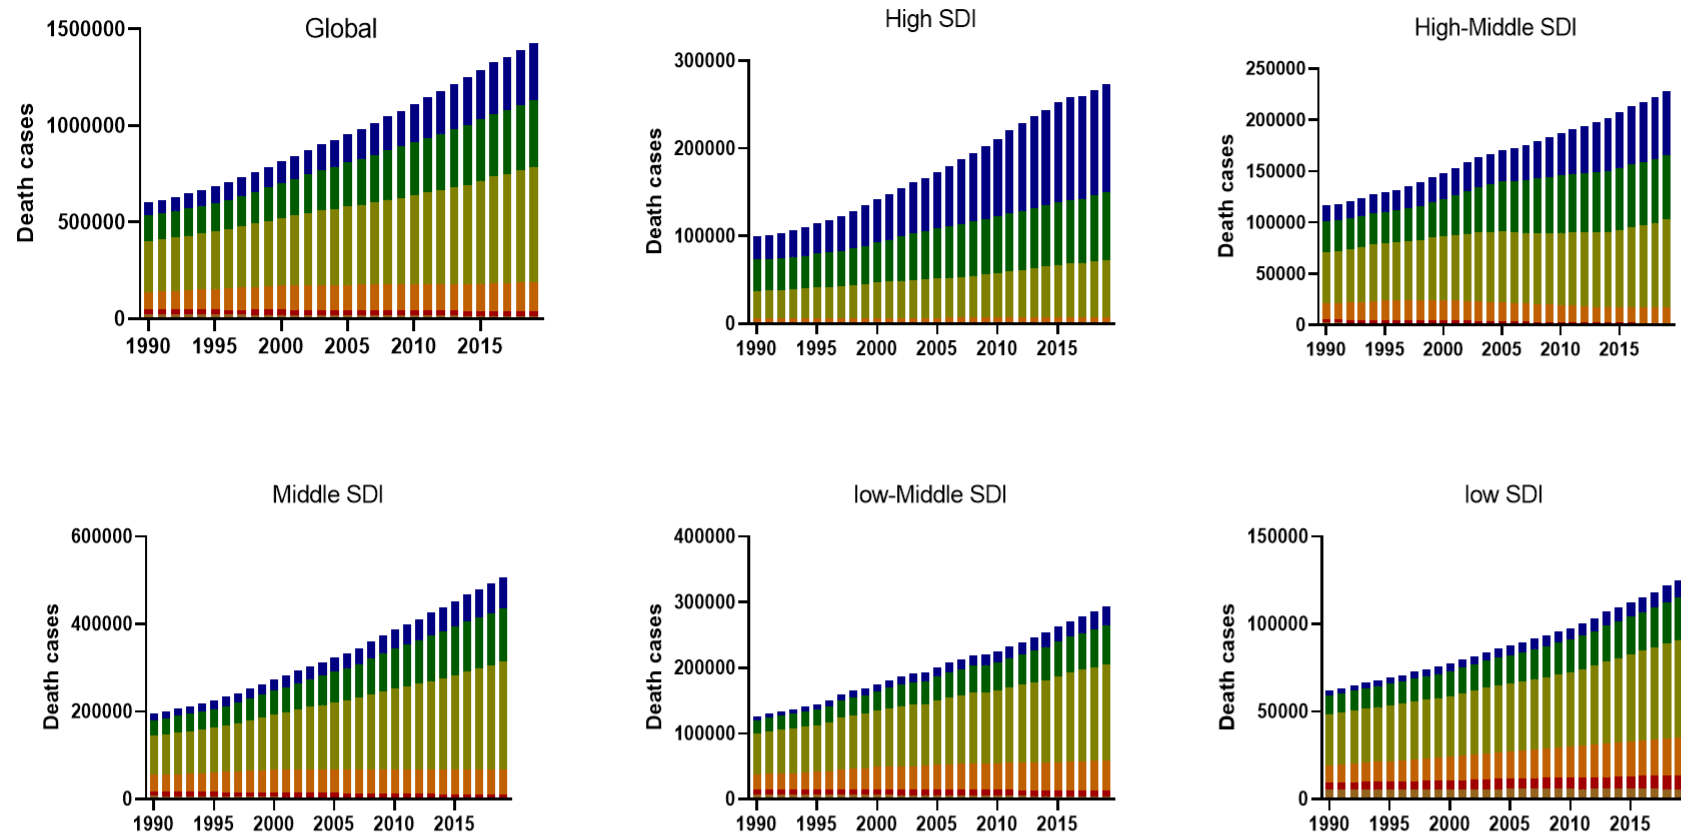

**B**

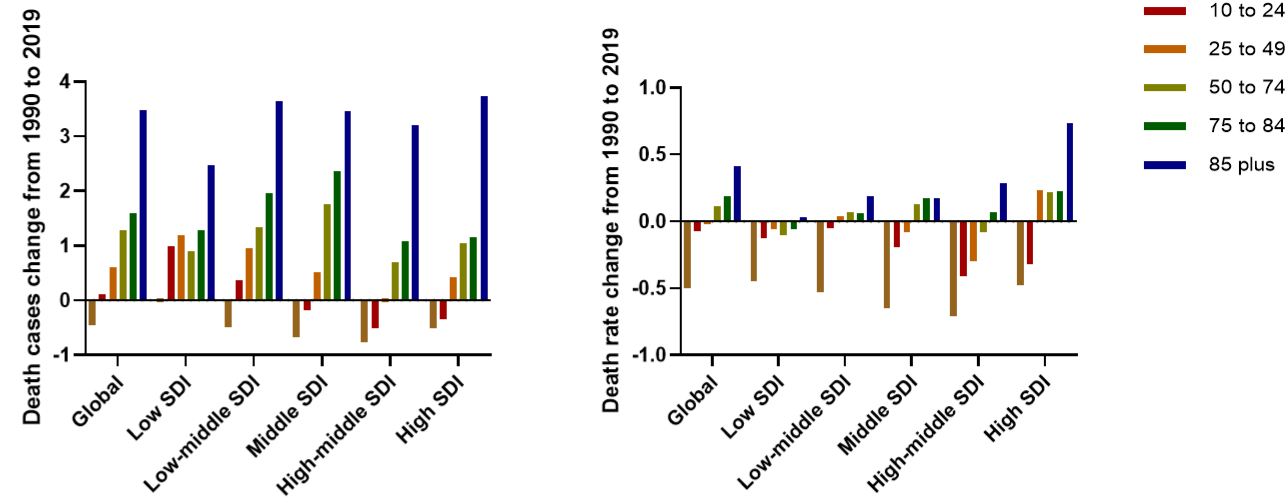

**C**

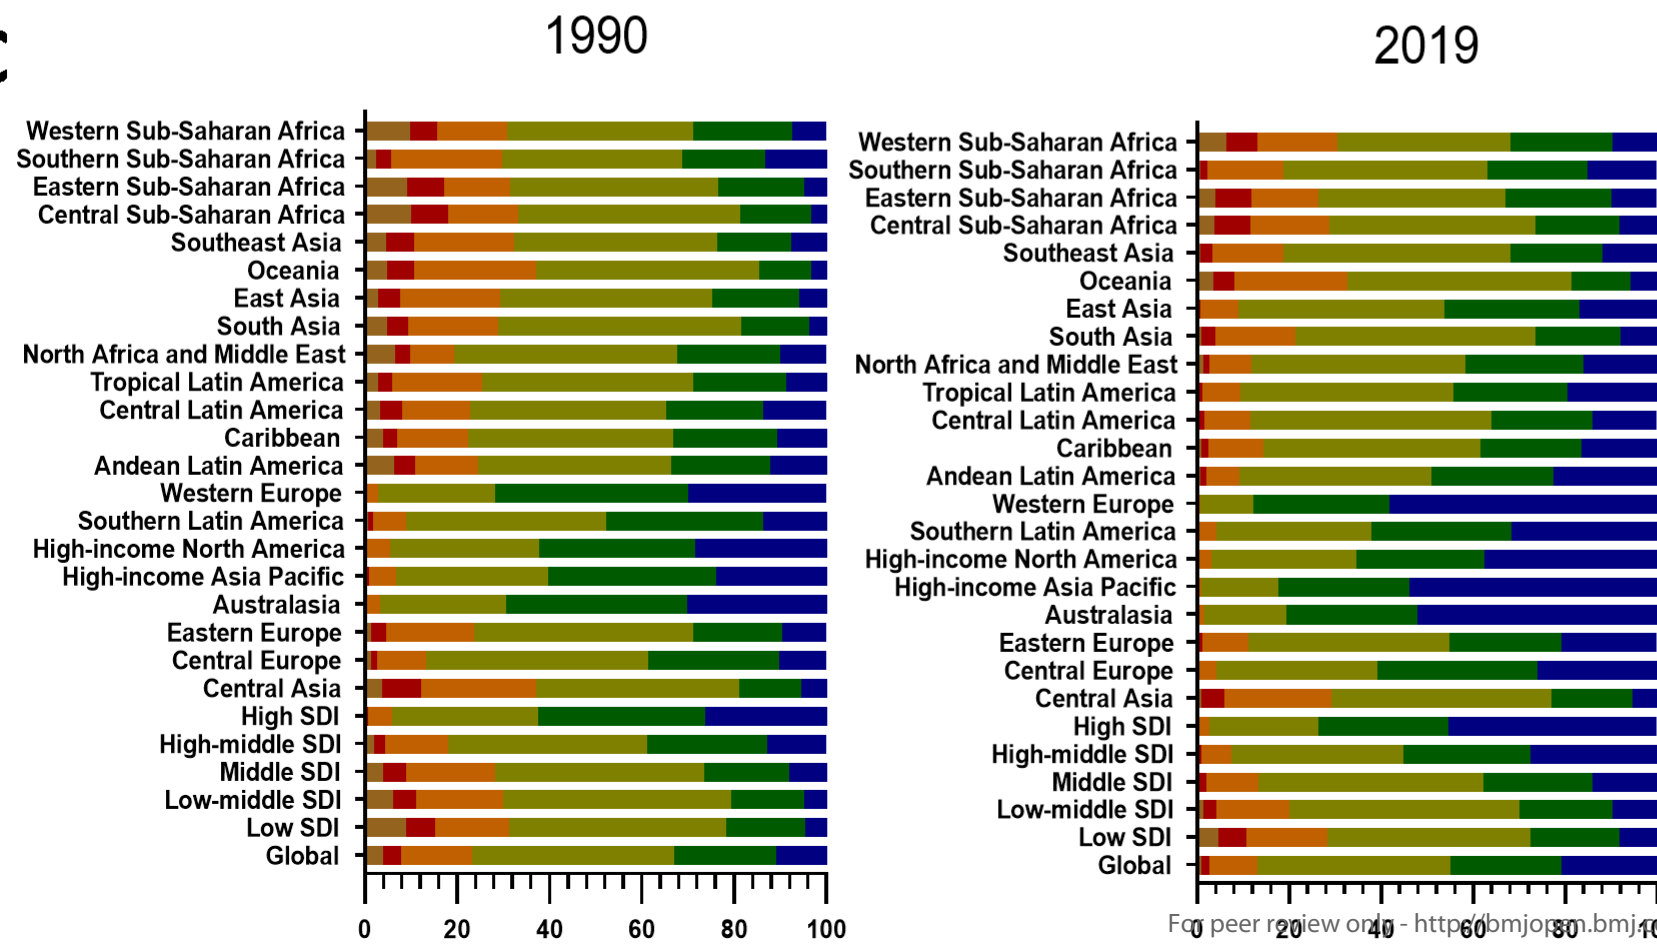

**D**

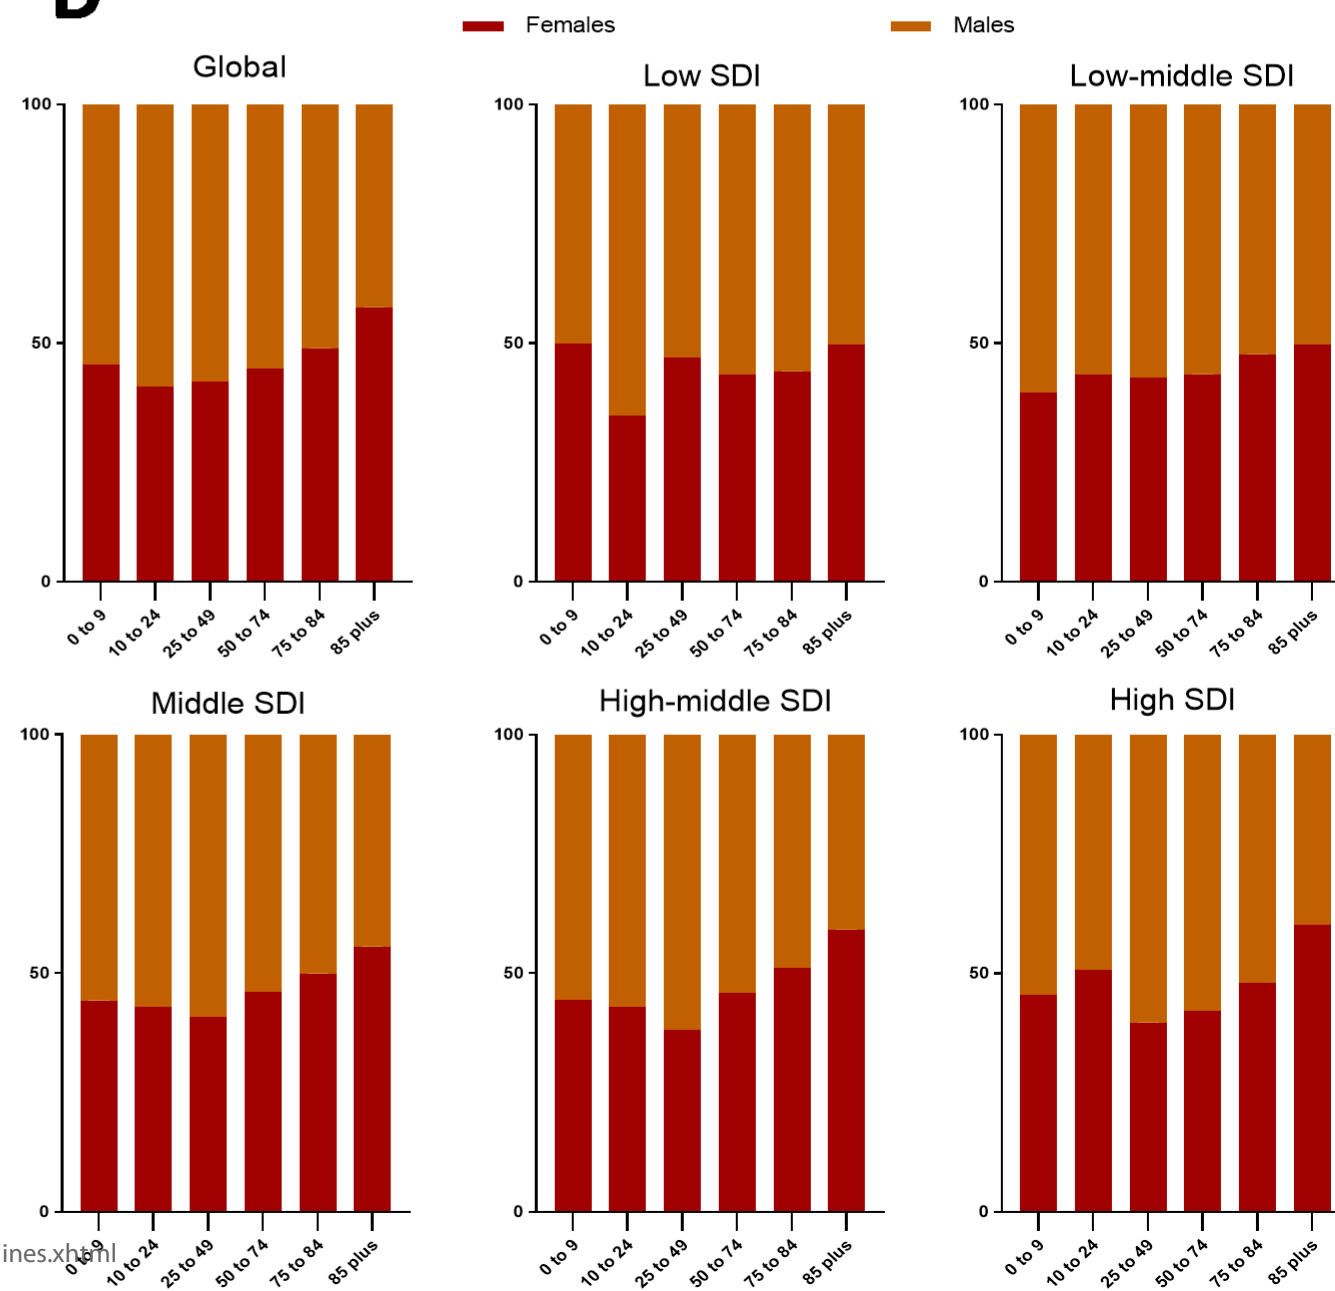

1  
2  
3  
4  
5  
6  
7  
8  
9  
10  
11  
12  
13  
14  
15  
16  
17  
18  
19  
20  
21  
22  
23  
24  
25  
26  
27  
28  
29  
30  
31  
32  
33  
34  
35  
36  
37  
38  
39  
40  
41  
42  
43  
44  
45  
46  
47  
48  
49  
50  
51  
52  
53  
54  
55  
56  
57  
58  
59  
60



A



B

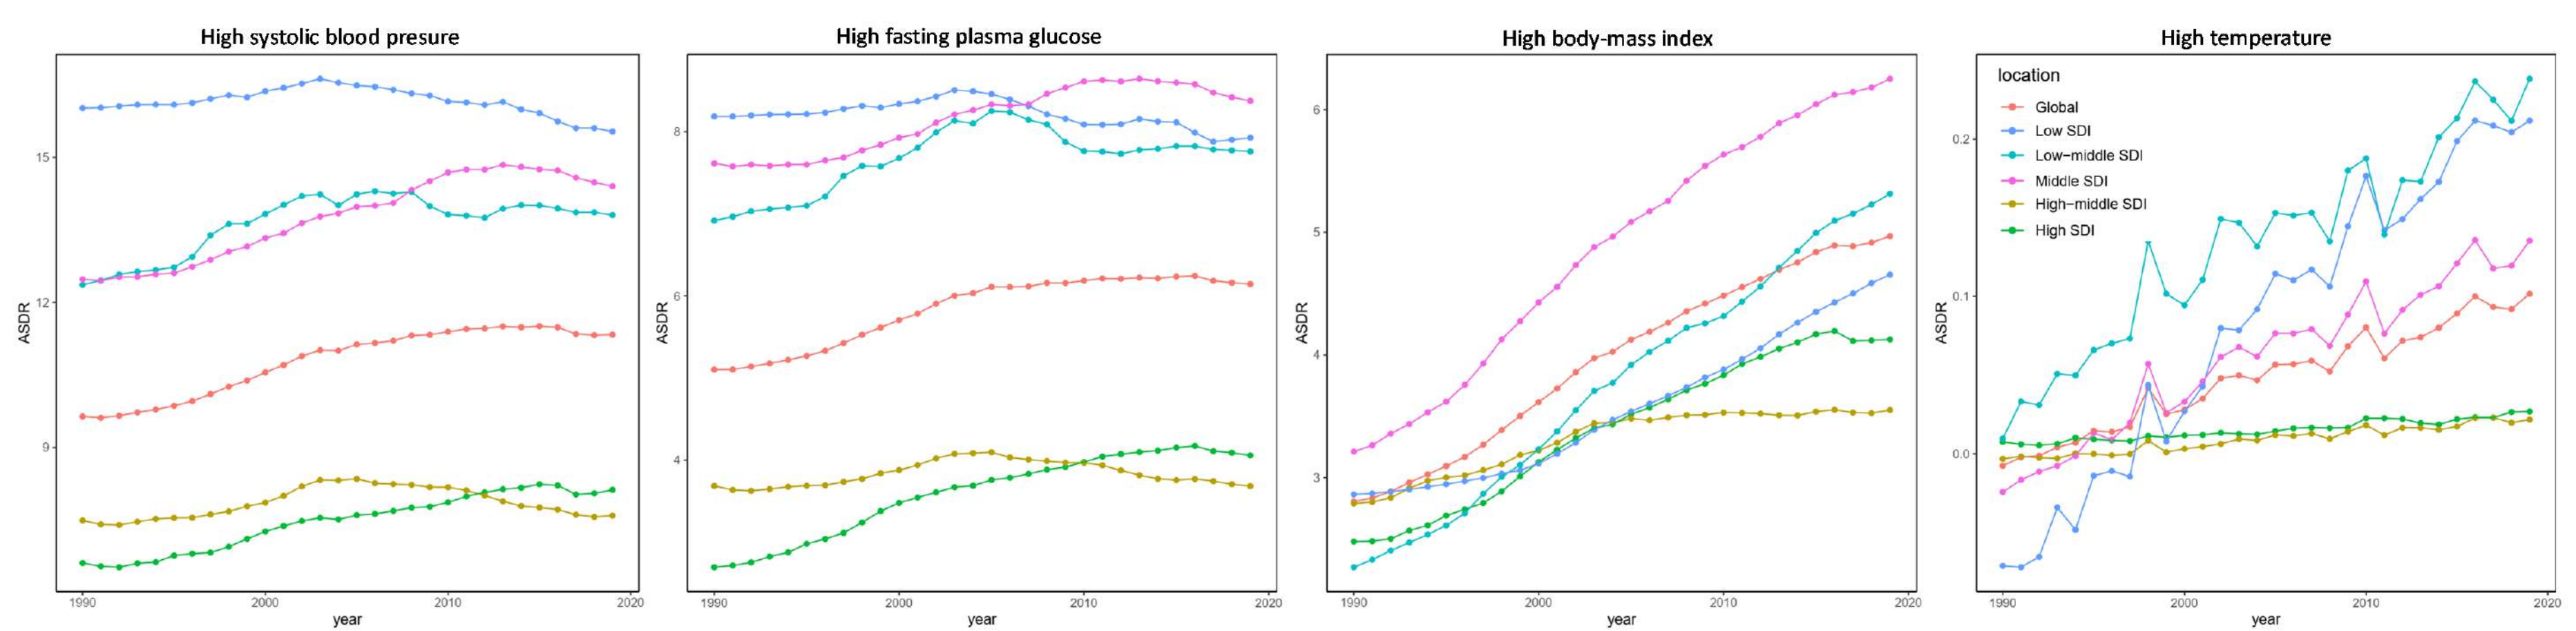

C





# Global Death Burden of Chronic Kidney Disease from 1990 to 2019

**Supplemental figure 1. Numbers of prevalence, incidence and DALYs of CKD in global and SDI areas in 1990 and 2019. DALYs, disability-adjusted life years.**

**Supplemental figure 2. The rank change of death numbers, ASDR, ASPR, ASR-DALYs, ASR-YLLs and ASR- YLDs of CKD from 1990 to 2019. DALYs, disability-adjusted life years. YLLs, years of life lost prematurely. YLDs, years lived with disability. ASDR, age-standardized death rate (per 100,000 population). ASPR, age-standardized prevalence rate (per 100,000 population). ASR-DALYs, age-standardized DALYs rate (per 100,000 population). ASR-YLLs, age-standardized YLLs rate (per 100,000 population). ASR-YLDs, age-standardized YLDs rate (per 100,000 population).**

**Supplemental figure 3. Temporal trends of ASDR, ASIR, ASPR, ASR-DALYs, ASR-YLLs and ASR- YLDs of CKD by genders from 1990 to 2019. DALYs, disability-adjusted life years. YLLs, years of life lost prematurely. YLDs, years lived with disability. ASDR, age-standardized death rate (per 100,000 population). ASPR, age-standardized prevalence rate (per 100,000 population). ASIR, age-standardized incidence rate (per 100,000 population). ASR-DALYs, age-standardized DALYs rate (per 100,000 population). ASR-YLLs, age-standardized YLLs rate (per 100,000 population). ASR-YLDs, age-standardized YLDs rate (per 100,000 population).**

**Supplemental figure 4. Relationship between ASR of prevalence, incidence and DALYs, with SDI from 1990 to 2019.**

**Supplemental figure 5. The proportions of death numbers in India, China and America in global.**

**Supplemental table 1. Prevalence cases and age-standardized prevalence rate (ASPR) of chronic kidney disease in 1990 and 2019, and the temporal trends**

1  
2  
3  
4  
5 **from 1990 to 2019 in global and regions.**  
6

7  
8 **Supplemental table 2. Incidence cases and age-standardized incidence rate (ASIR) of chronic kidney disease in 1990 and 2019, and the temporal trends from**  
9 **1990 to 2019 in global and regions.**  
10

11  
12 **Supplemental table 3. DALYs and age-standardized DALYs rate (ASR-DALYs) of chronic kidney disease in 1990 and 2019, and the temporal trends from**  
13 **1990 to 2019 in global and regions.**  
14

15  
16  
17 **Supplemental table 4. Deaths and age-standardized death rate (ASDR) of chronic kidney disease in 1990 and 2019, and the temporal trends from 1990 to 2019**  
18 **in 204 countries.**  
19

20  
21 **Supplemental table 5. Death cases ratio between females to males and age-standardized death rate (ASDR) ratio between females to males in 21 geographic**  
22 **regions from 1990 to 2019 in 21 regions.**  
23

24  
25  
26 **Supplemental table 6. Death cases ratio between females to males and age-standardized death rate (ASDR) ratio between females to males in 204 countries**  
27 **and territories from 1990 to 2019 in 204 countries.**  
28  
29  
30  
31  
32  
33  
34  
35  
36  
37  
38  
39  
40  
41  
42  
43  
44  
45  
46

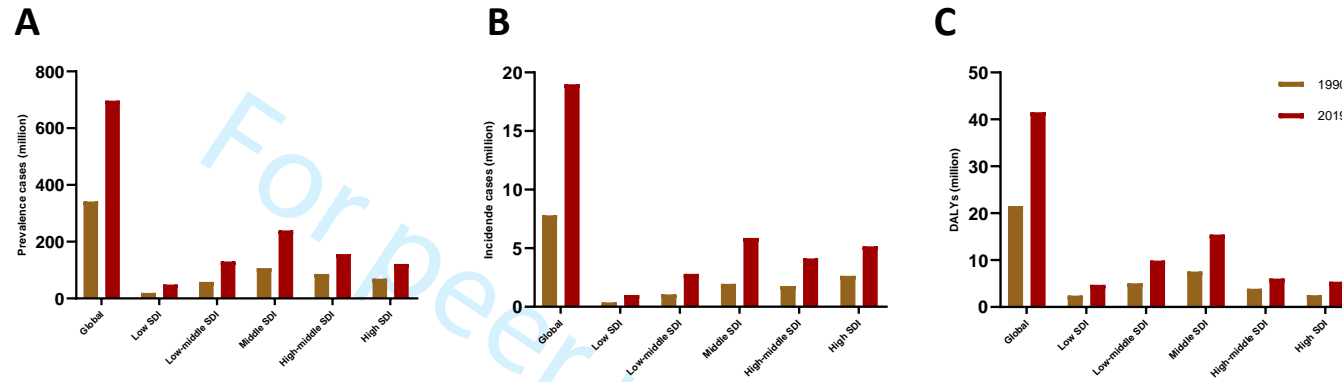

Supplemental figure 1. Numbers of prevalence, incidence and DALYs of CKD in global and SDI areas in 1990 and 2019. DALYs, disability-adjusted life years.



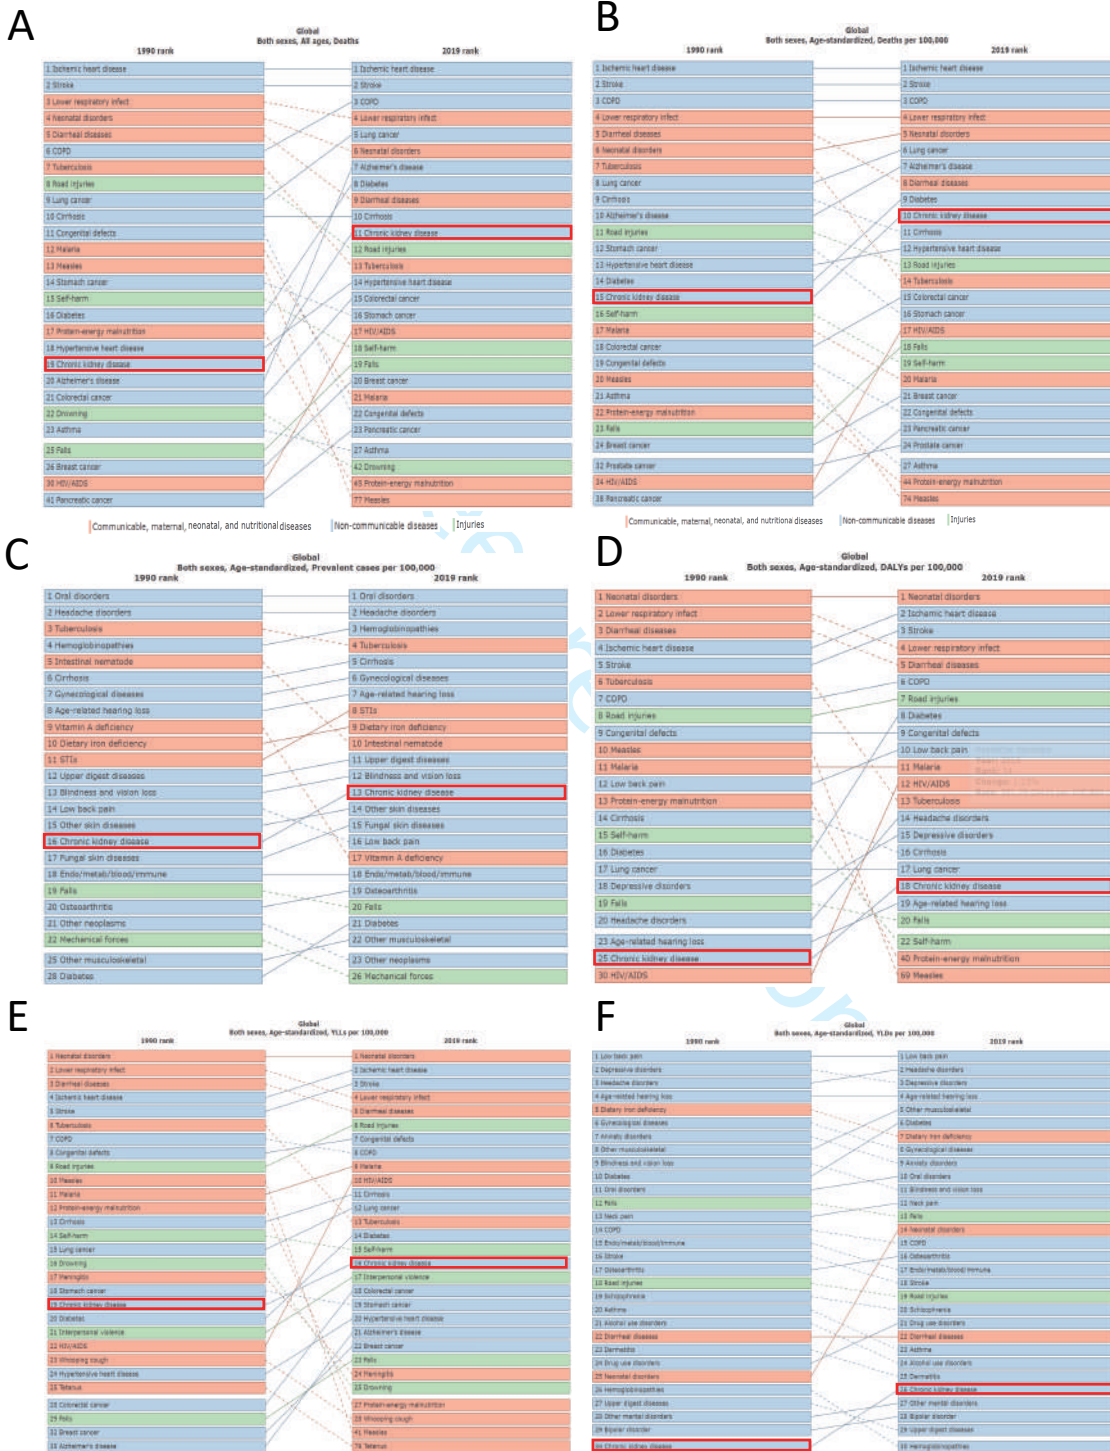

1  
2  
3  
4  
5 **Supplemental figure 2. The rank change of death numbers, ASDR, ASPR, ASR-DALYs, ASR-YLLs and ASR- YLDs of CKD from 1990 to 2019.** DALYs,  
6 disability-adjusted life years. YLLs, years of life lost prematurely. YLDs, years lived with disability. ASDR, age-standardized death rate (per 100,000 population).  
7 ASPR, age-standardized prevalence rate (per 100,000 population). ASR-DALYs, age-standardized DALYs rate (per 100,000 population). ASR-YLLs, age-standardized  
8 YLLs rate (per 100,000 population). ASR-YLDs, age-standardized YLDs rate (per 100,000 population).  
9  
10  
11  
12  
13  
14  
15  
16  
17  
18  
19  
20  
21  
22  
23  
24  
25  
26  
27  
28  
29  
30  
31  
32  
33  
34  
35  
36  
37  
38  
39  
40  
41  
42  
43  
44  
45  
46

For peer review only

Both

Female

Male

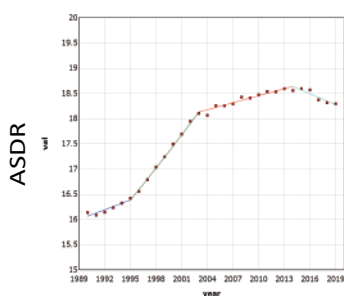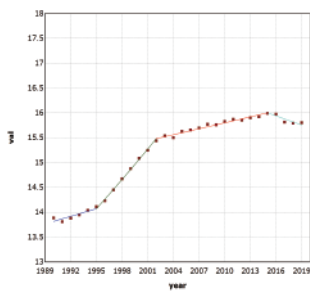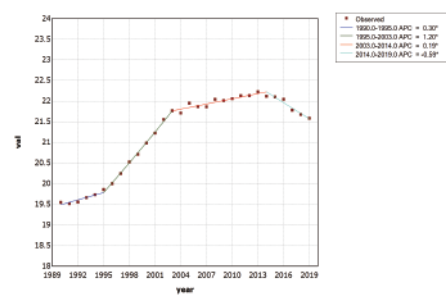

\*Indicates that the Annual Percent Change (APC) is significantly different from zero at the alpha = 0.05 level. Final Selected Model: 3 Joinkpoints.

\*Indicates that the Annual Percent Change (APC) is significantly different from zero at the alpha = 0.05 level. Final Selected Model: 3 Joinkpoints.

\*Indicates that the Annual Percent Change (APC) is significantly different from zero at the alpha = 0.05 level. Final Selected Model: 3 Joinkpoints.

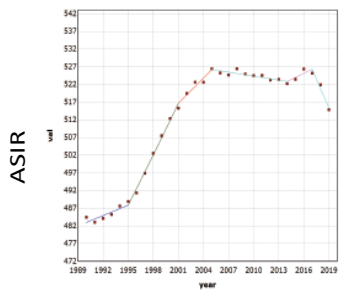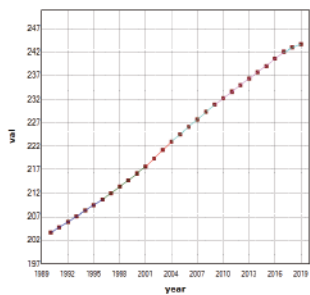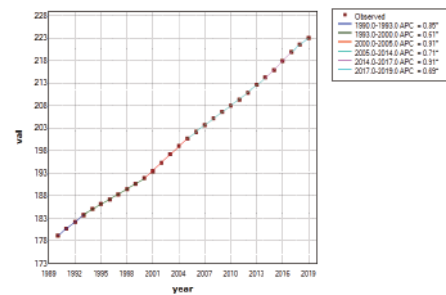

\*Indicates that the Annual Percent Change (APC) is significantly different from zero at the alpha = 0.05 level. Final Selected Model: 5 Joinkpoints.

\*Indicates that the Annual Percent Change (APC) is significantly different from zero at the alpha = 0.05 level. Final Selected Model: 5 Joinkpoints.

\*Indicates that the Annual Percent Change (APC) is significantly different from zero at the alpha = 0.05 level. Final Selected Model: 5 Joinkpoints.

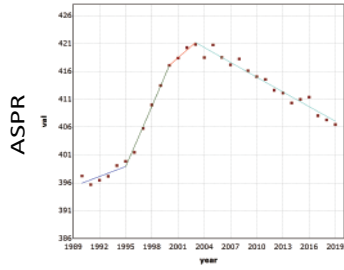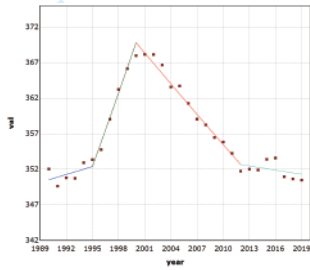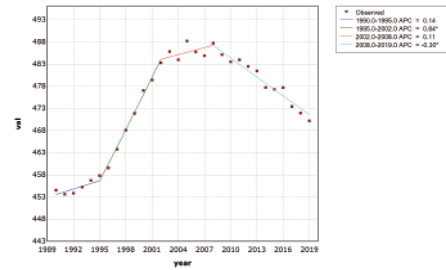

\*Indicates that the Annual Percent Change (APC) is significantly different from zero at the alpha = 0.05 level. Final Selected Model: 5 Joinkpoints.

\*Indicates that the Annual Percent Change (APC) is significantly different from zero at the alpha = 0.05 level. Final Selected Model: 5 Joinkpoints.

\*Indicates that the Annual Percent Change (APC) is significantly different from zero at the alpha = 0.05 level. Final Selected Model: 5 Joinkpoints.

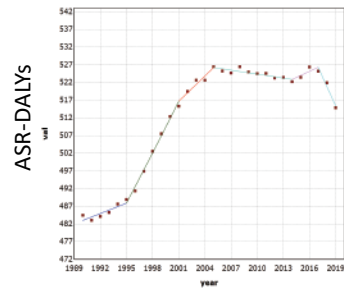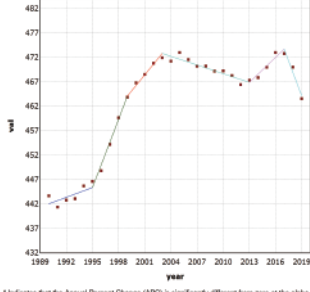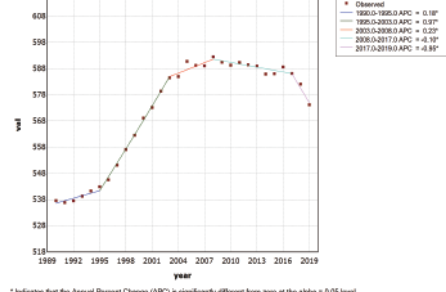

\*Indicates that the Annual Percent Change (APC) is significantly different from zero at the alpha = 0.05 level. Final Selected Model: 5 Joinkpoints.

\*Indicates that the Annual Percent Change (APC) is significantly different from zero at the alpha = 0.05 level. Final Selected Model: 5 Joinkpoints.

\*Indicates that the Annual Percent Change (APC) is significantly different from zero at the alpha = 0.05 level. Final Selected Model: 5 Joinkpoints.

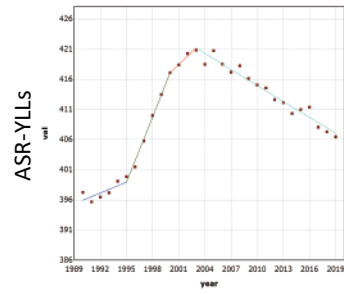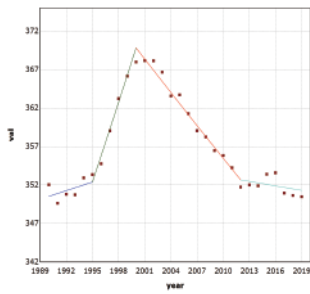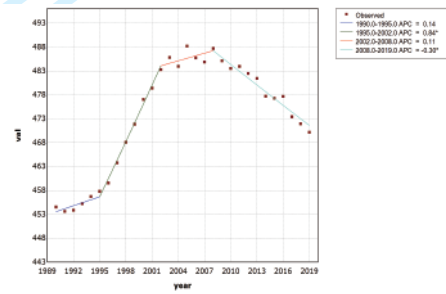

\*Indicates that the Annual Percent Change (APC) is significantly different from zero at the alpha = 0.05 level. Final Selected Model: 5 Joinkpoints.

\*Indicates that the Annual Percent Change (APC) is significantly different from zero at the alpha = 0.05 level. Final Selected Model: 5 Joinkpoints.

\*Indicates that the Annual Percent Change (APC) is significantly different from zero at the alpha = 0.05 level. Final Selected Model: 5 Joinkpoints.

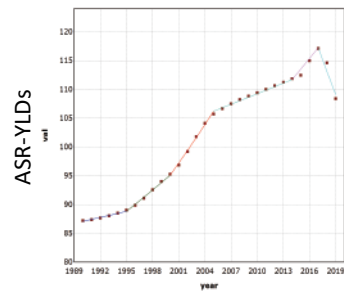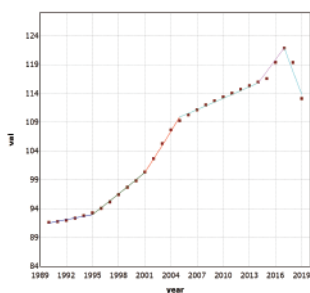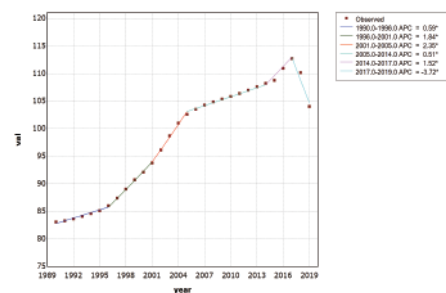

\*Indicates that the Annual Percent Change (APC) is significantly different from zero at the alpha = 0.05 level. Final Selected Model: 5 Joinkpoints.

\*Indicates that the Annual Percent Change (APC) is significantly different from zero at the alpha = 0.05 level. Final Selected Model: 5 Joinkpoints.

\*Indicates that the Annual Percent Change (APC) is significantly different from zero at the alpha = 0.05 level. Final Selected Model: 5 Joinkpoints.

1  
2  
3  
4  
5 **Supplemental figure 3. Temporal trends of ASDR, ASIR, ASPR, ASR-DALYs, ASR-YLLs and ASR- YLDs of CKD by genders from 1990 to 2019.** DALYs,  
6 disability-adjusted life years. YLLs, years of life lost prematurely. YLDs, years lived with disability. ASDR, age-standardized death rate (per 100,000 population).  
7 ASPR, age-standardized prevalence rate (per 100,000 population). ASIR, age-standardized incidence rate (per 100,000 population). ASR-DALYs, age-standardized  
8 DALYs rate (per 100,000 population). ASR-YLLs, age-standardized YLLs rate (per 100,000 population). ASR-YLDs, age-standardized YLDs rate (per 100,000  
9 population).  
10  
11  
12  
13  
14  
15  
16  
17  
18  
19  
20  
21  
22  
23  
24  
25  
26  
27  
28  
29  
30  
31  
32  
33  
34  
35  
36  
37  
38  
39  
40  
41  
42  
43  
44  
45  
46

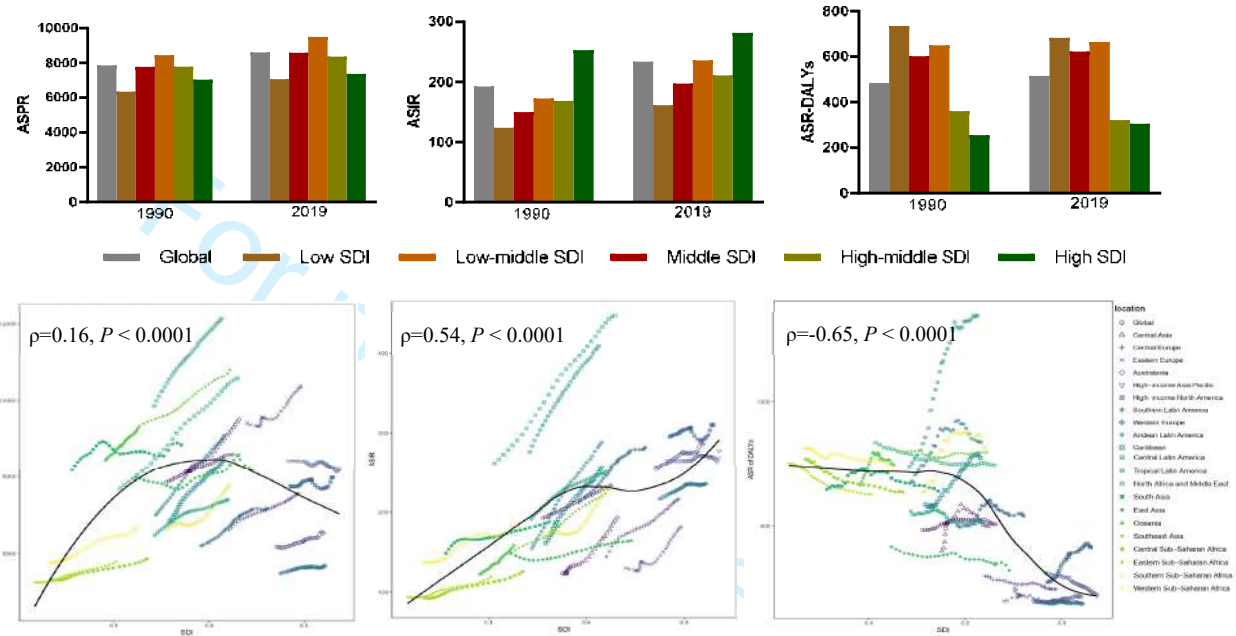

Supplemental figure 4. Relationship between ASR of prevalence, incidence and DALYs, with SDI from 1990 to 2019.

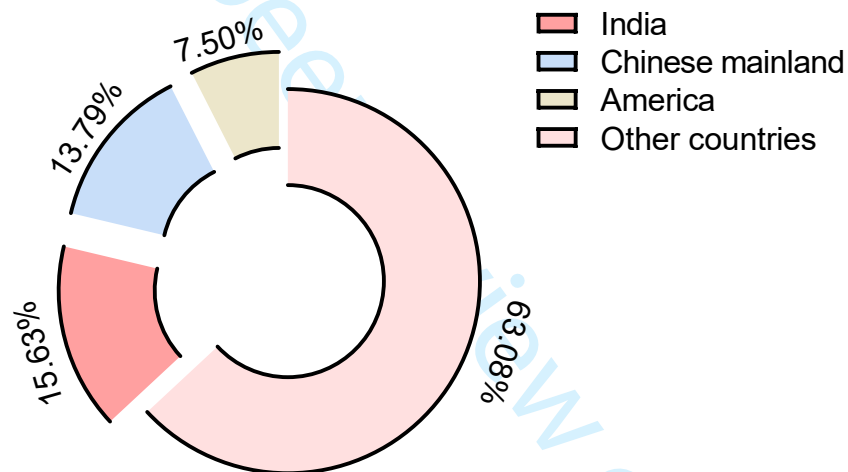

Supplemental figure 5. The proportions of death numbers in India, China and America in global.

1  
2  
3  
4  
5  
6  
7  
8  
9  
10  
11  
12  
13  
14  
15  
16  
17  
18  
19  
20  
21  
22  
23  
24  
25  
26  
27  
28  
29  
30  
31  
32  
33  
34  
35  
36  
37  
38  
39  
40  
41  
42  
43  
44  
45  
46

**Supplemental table 1. Prevalence cases and age-standardized prevalence rate (ASPR) of chronic kidney disease in 1990 and 2019, and the temporal trends from 1990 to 2019 in global and regions.**

For peer review only

| Characteristics               | 1990                                 |                           | 2019                                 |                            | 1990-2019             |
|-------------------------------|--------------------------------------|---------------------------|--------------------------------------|----------------------------|-----------------------|
|                               | Prevalence cases (*10 <sup>6</sup> ) | ASPR per 100,000          | Prevalence cases (*10 <sup>6</sup> ) | ASPR per 100,000           | EAPC of ASPR (95% CI) |
|                               | (95% UI)                             | population (95% UI)       | (95% UI)                             | population (95% UI)        |                       |
| Global                        | 341.67 (316.59-366.107.7)            | 7855.83 (7300.33-8372.66) | 697.29 (650.05-741080.75)            | 8596.21 (8015.74-9125.28)  | 0.32 (0.32 to 0.33)   |
| <b>Gender</b>                 |                                      |                           |                                      |                            |                       |
| Males                         | 153.14 (141.72-164.63)               | 7349.01 (6823.3-7842.18)  | 314.32 (292.96-334.84)               | 8109.77 (7572.96-8608.03)  | 0.69 (0.68 to 0.7)    |
| Females                       | 188.52 (174.87-201.34)               | 8305.89 (7710.48-8854.59) | 382.98 (356.75-406.65)               | 9049.82 (8425.02-9616.13)  | 0.69 (0.68 to 0.7)    |
| <b>Sociodemographic index</b> |                                      |                           |                                      |                            |                       |
| Low                           | 19.74 (18.26-21321.4)                | 6338.15 (5882.6-6789.29)  | 48.7 (45.05-52510.46)                | 7057.41 (6568.24-7529.2)   | 0.34 (0.32 to 0.36)   |
| Low-middle                    | 58.61 (54.03-63338.25)               | 7766.83 (7198.66-8314.67) | 130.15 (120.81-139501.25)            | 8579.86 (7996.24-9142.82)  | 0.25 (0.21 to 0.29)   |
| Middle                        | 107.24 (98.79-115911.52)             | 8440.84 (7808.66-9019.18) | 239.88 (222.64-256277.84)            | 9491.19 (8838.42-10086.19) | 0.48 (0.45 to 0.5)    |
| High-middle                   | 86.19 (79.75-92396.6)                | 7781.68 (7221.18-8317.69) | 156.23 (145.42-166645.78)            | 8350.95 (7763.91-8901.8)   | 0.32 (0.29 to 0.34)   |
| High                          | 69.73 (64.86-74222.57)               | 7026.65 (6533.72-7475.58) | 121.95 (114.53-129214.01)            | 7364.77 (6889.24-7796.06)  | 0.12 (0.09 to 0.14)   |
| <b>21 GBD regions</b>         |                                      |                           |                                      |                            |                       |
| Central Asia                  | 4.45 (4.11-4803.7)                   | 8137.03 (7524.1-8741.66)  | 8.15 (7.51-8784.58)                  | 9524.26 (8802.23-10175.81) | 0.59 (0.53 to 0.65)   |



1  
2  
3  
4  
5  
6  
7  
8  
9  
10  
11  
12  
13  
14  
15  
16  
17  
18  
19  
20  
21  
22  
23  
24  
25  
26  
27  
28  
29  
30  
31  
32  
33  
34  
35  
36  
37  
38  
39  
40  
41  
42  
43  
44  
45  
46

|                              |                        |                            |                           |                              |                       |
|------------------------------|------------------------|----------------------------|---------------------------|------------------------------|-----------------------|
| Central Europe               | 9.15 (8.44-9807.35)    | 6605.48 (6109.43-7070.96)  | 13.57 (12.65-14461.73)    | 7564.59 (7024.38-8040.5)     | 0.42 (0.4 to 0.44)    |
| Eastern Europe               | 24.38 (22.55-26323.67) | 9409.89 (8700.06-10160.11) | 30.13 (27.96-32292.36)    | 10377.83 (9616.95-11142.47)  | 0.39 (0.34 to 0.44)   |
| Australasia                  | 1.41 (1.33-1487.37)    | 6177.9 (5831.64-6510.55)   | 2.95 (2.77-3128.02)       | 6532.01 (6133.49-6925.11)    | 0.22 (0.2 to 0.23)    |
| High-income Asia Pacific     | 16.55 (15.42-17679.41) | 8433.41 (7860.45-8971.08)  | 31 (29.12-32934.31)       | 8231.15 (7714.65-8729.32)    | -0.1 (-0.12 to -0.08) |
| High-income North America    | 26.23 (24.33-28067.57) | 7750.33 (7175.26-8252.76)  | 43.98 (41.11-46803.08)    | 7982.58 (7433.75-8484.6)     | 0.03 (-0.02 to 0.08)  |
| Southern Latin America       | 2.85 (2.66-3038.14)    | 6199.61 (5786.14-6591)     | 5.72 (5.38-6077.58)       | 7174.32 (6750.95-7629.01)    | 0.54 (0.49 to 0.59)   |
| Western Europe               | 29.05 (27.04-30993.2)  | 5488.94 (5116.7-5832.82)   | 45.44 (42.65-48233.7)     | 5690.53 (5326.14-6020.93)    | 0.08 (0.06 to 0.1)    |
| Andean Latin America         | 1.76 (1.52-2061.21)    | 7004.76 (6076.38-8070.59)  | 5.32 (4.71-6069.48)       | 9101.2 (8067.32-10290.91)    | 0.93 (0.91 to 0.94)   |
| Caribbean                    | 1.97 (1.84-2108.93)    | 6840.61 (6371.07-7299.12)  | 4.29 (4.03-4568.68)       | 8457.06 (7927.23-8994.33)    | 0.74 (0.7 to 0.78)    |
| Central Latin America        | 10.31 (9.55-11027.08)  | 9865 (9168.77-10521.68)    | 29.53 (27.68-31265.59)    | 12139.27 (11377.05-12843.88) | 0.68 (0.64 to 0.71)   |
| Tropical Latin America       | 7.08 (6.58-7550.26)    | 6482.97 (6054.23-6886)     | 17.9 (16.76-18992.36)     | 7399.15 (6923.65-7835.63)    | 0.42 (0.39 to 0.45)   |
| North Africa and Middle East | 15.77 (14.73-16764.82) | 7697.07 (7182.72-8168.78)  | 49.8 (46.52-52818.54)     | 10589.67 (9930.4-11229.54)   | 1.17 (1.13 to 1.22)   |
| South Asia                   | 60.22 (55.46-65289.02) | 8186.89 (7582.95-8782.32)  | 139.51 (128.99-150327.5)  | 8847.66 (8206.45-9453.58)    | 0.11 (0.03 to 0.18)   |
| East Asia                    | 82.94 (76.25-90185.75) | 7989.69 (7377.2-8599.68)   | 156.84 (144.51-169062.38) | 8180.65 (7568.21-8798.3)     | 0.29 (0.2 to 0.37)    |
| Oceania                      | 0.36 (0.33-391.33)     | 8440.17 (7784.51-9111.81)  | 0.9 (0.82-974.96)         | 9296.4 (8596.13-9971.06)     | 0.3 (0.29 to 0.31)    |

|                             |                        |                            |                        |                             |                     |
|-----------------------------|------------------------|----------------------------|------------------------|-----------------------------|---------------------|
| Southeast Asia              | 31.01 (28.51-33656.96) | 9351.48 (8661.82-10057.66) | 71.14 (65.94-76348.22) | 10803.4 (10057.32-11534.34) | 0.5 (0.49 to 0.52)  |
| Central Sub-Saharan Africa  | 1.69 (1.55-1841.1)     | 5306.9 (4899.19-5732.96)   | 4.52 (4.16-4907.57)    | 5867.73 (5434.29-6284.81)   | 0.36 (0.32 to 0.39) |
| Eastern Sub-Saharan Africa  | 5.54 (5.12-5997.22)    | 5254.32 (4862.09-5638.51)  | 13.92 (12.84-15065.98) | 5800.09 (5395.2-6210.24)    | 0.36 (0.33 to 0.38) |
| Southern Sub-Saharan Africa | 2.3 (2.13-2464.83)     | 6633.49 (6172.65-7075.02)  | 5.02 (4.66-5366.22)    | 7769.91 (7260.61-8261.86)   | 0.53 (0.45 to 0.61) |
| Western Sub-Saharan Africa  | 6.64 (6.16-7139.44)    | 5768.63 (5363.39-6151.96)  | 17.67 (16.4-18953.01)  | 6678.91 (6225.96-7102.83)   | 0.56 (0.52 to 0.59) |

---

1  
2  
3  
4  
5  
6  
7  
8  
9  
10  
11  
12  
13  
14  
15  
16  
17  
18  
19  
20  
21  
22  
23  
24  
25  
26  
27  
28  
29  
30  
31  
32  
33  
34  
35  
36  
37  
38  
39  
40  
41  
42  
43  
44  
45  
46

**Supplemental table 2. Incidence cases and age-standardized incidence rate (ASIR) of chronic kidney disease in 1990 and 2019, and the temporal trends from 1990 to 2019 in global and regions.**

For peer review only

| Characteristics               | 1990                                |                        | 2019                                |                        | 1990-2019             |
|-------------------------------|-------------------------------------|------------------------|-------------------------------------|------------------------|-----------------------|
|                               | Incidence cases (*10 <sup>6</sup> ) | ASIR per 100,000       | Incidence cases (*10 <sup>6</sup> ) | ASIR per 100,000       | EAPC of ASIR (95% CI) |
|                               | (95% UI)                            | population (95% UI)    | (95% UI)                            | population (95% UI)    |                       |
| Global                        | 7.8 (7.17-8485.39)                  | 192.45 (177.31-209.05) | 18.99 (17.56-20518.16)              | 233.65 (216.56-252.31) | 0.69 (0.68 to 0.7)    |
| <b>Gender</b>                 |                                     |                        |                                     |                        |                       |
| Males                         | 3.36 (3.09-3.65)                    | 179.21 (164.8-194.74)  | 8.51 (7.84-9.23)                    | 223.02 (206.07-241.18) | 0.69 (0.68 to 0.7)    |
| Females                       | 4.44 (4.08-4.84)                    | 203.64 (187.5-221.38)  | 10.47 (9.7-11.32)                   | 243.63 (225.94-262.66) | 0.69 (0.68 to 0.7)    |
| <b>Sociodemographic index</b> |                                     |                        |                                     |                        |                       |
| Low                           | 0.37 (0.34-398.17)                  | 123.72 (114.25-133.97) | 1.01 (0.93-1085.2)                  | 161.24 (148.07-175.64) | 0.95 (0.92 to 0.99)   |
| Low-middle                    | 1.05 (0.97-1139.39)                 | 149.68 (137.38-162.87) | 2.81 (2.58-3056.52)                 | 197.07 (181.51-214.36) | 0.91 (0.87 to 0.95)   |
| Middle                        | 1.95 (1.79-2127.2)                  | 172.4 (157.74-188.79)  | 5.87 (5.4-6373.37)                  | 235.71 (218.23-254.87) | 1.17 (1.14 to 1.2)    |
| High-middle                   | 1.78 (1.63-1952.09)                 | 168.37 (154.83-183.45) | 4.13 (3.8-4493.35)                  | 210.65 (194.34-228.37) | 0.89 (0.86 to 0.92)   |
| High                          | 2.64 (2.41-2883.51)                 | 252.66 (232.46-274.36) | 5.15 (4.75-5569.87)                 | 281.67 (260.21-303.81) | 0.28 (0.24 to 0.32)   |
| <b>21 GBD regions</b>         |                                     |                        |                                     |                        |                       |
| Central Asia                  | 0.07 (0.06-75.25)                   | 123.99 (113.45-135.88) | 0.16 (0.15-178.53)                  | 193.3 (176.73-211.27)  | 1.69 (1.52 to 1.87)   |

|    |                              |                     |                        |                     |                        |                      |
|----|------------------------------|---------------------|------------------------|---------------------|------------------------|----------------------|
| 1  |                              |                     |                        |                     |                        |                      |
| 2  |                              |                     |                        |                     |                        |                      |
| 3  |                              |                     |                        |                     |                        |                      |
| 4  |                              |                     |                        |                     |                        |                      |
| 5  |                              |                     |                        |                     |                        |                      |
| 6  | Central Europe               | 0.21 (0.19-229.95)  | 144.36 (131.43-158.87) | 0.44 (0.4-481.17)   | 216.5 (197.99-236.75)  | 1.21 (1.12 to 1.3)   |
| 7  |                              |                     |                        |                     |                        |                      |
| 8  | Eastern Europe               | 0.34 (0.3-370.22)   | 130.48 (119.44-142.71) | 0.54 (0.49-599.18)  | 181.85 (166.07-199.03) | 1.32 (1.15 to 1.49)  |
| 9  |                              |                     |                        |                     |                        |                      |
| 10 | Australasia                  | 0.06 (0.06-65.23)   | 254.5 (240.37-269.78)  | 0.14 (0.13-153.73)  | 286.14 (264.78-308.93) | 0.37 (0.33 to 0.41)  |
| 11 |                              |                     |                        |                     |                        |                      |
| 12 | High-income Asia Pacific     | 0.53 (0.49-577.29)  | 265.13 (244.47-287.79) | 1.21 (1.11-1315.46) | 277.51 (255.67-300.82) | 0.08 (0.04 to 0.13)  |
| 13 |                              |                     |                        |                     |                        |                      |
| 14 | High-income North America    | 1.04 (0.94-1140.52) | 295.47 (270.34-323.33) | 1.89 (1.73-2062.59) | 310.44 (284.74-336.3)  | 0.03 (-0.05 to 0.12) |
| 15 |                              |                     |                        |                     |                        |                      |
| 16 | Southern Latin America       | 0.1 (0.09-106.64)   | 211.66 (193.13-230.93) | 0.23 (0.22-253.7)   | 282.02 (260.12-304.6)  | 1.02 (0.93 to 1.1)   |
| 17 |                              |                     |                        |                     |                        |                      |
| 18 | Western Europe               | 1.28 (1.16-1410.45) | 216.75 (198.62-236.36) | 2.16 (1.99-2344.51) | 235.6 (216.93-254.91)  | 0.25 (0.2 to 0.3)    |
| 19 |                              |                     |                        |                     |                        |                      |
| 20 | Andean Latin America         | 0.04 (0.03-38.3)    | 154.8 (142.57-167.62)  | 0.16 (0.15-175.89)  | 288.34 (264.91-311.21) | 2.2 (2.09 to 2.3)    |
| 21 |                              |                     |                        |                     |                        |                      |
| 22 | Caribbean                    | 0.04 (0.04-48.74)   | 161.46 (148.31-176.22) | 0.13 (0.12-141.71)  | 256.39 (237.73-277)    | 1.58 (1.48 to 1.68)  |
| 23 |                              |                     |                        |                     |                        |                      |
| 24 | Central Latin America        | 0.27 (0.25-292.01)  | 276.65 (252.64-304.54) | 0.99 (0.93-1060.8)  | 409.61 (383.06-437.91) | 1.29 (1.21 to 1.36)  |
| 25 |                              |                     |                        |                     |                        |                      |
| 26 | Tropical Latin America       | 0.19 (0.18-210.14)  | 191.28 (176.52-209.33) | 0.6 (0.56-655.92)   | 250.85 (233.24-272.18) | 0.89 (0.82 to 0.96)  |
| 27 |                              |                     |                        |                     |                        |                      |
| 28 | North Africa and Middle East | 0.51 (0.47-550.25)  | 261.9 (240.97-285.91)  | 2.03 (1.88-2202.72) | 447.48 (415.13-482.83) | 1.97 (1.87 to 2.08)  |
| 29 |                              |                     |                        |                     |                        |                      |
| 30 | South Asia                   | 1.01 (0.93-1104.53) | 148.9 (136.4-162.57)   | 2.67 (2.43-2918.85) | 181.87 (165.91-198.75) | 0.61 (0.54 to 0.68)  |
| 31 |                              |                     |                        |                     |                        |                      |
| 32 | East Asia                    | 1.33 (1.21-1465.64) | 148.49 (135.05-163.27) | 3.27 (2.98-3599.05) | 164.52 (150.62-179.18) | 0.61 (0.51 to 0.7)   |
| 33 |                              |                     |                        |                     |                        |                      |
| 34 | Oceania                      | 0 (0-5.25)          | 122.53 (112.38-133.56) | 0.01 (0.01-14.89)   | 158.68 (145.3-172.89)  | 0.79 (0.74 to 0.84)  |
| 35 |                              |                     |                        |                     |                        |                      |
| 36 |                              |                     |                        |                     |                        |                      |
| 37 |                              |                     |                        |                     |                        |                      |
| 38 |                              |                     |                        |                     |                        |                      |
| 39 |                              |                     |                        |                     |                        |                      |
| 40 |                              |                     |                        |                     |                        |                      |
| 41 |                              |                     |                        |                     |                        |                      |
| 42 |                              |                     |                        |                     |                        |                      |
| 43 |                              |                     |                        |                     |                        |                      |
| 44 |                              |                     |                        |                     |                        |                      |
| 45 |                              |                     |                        |                     |                        |                      |
| 46 |                              |                     |                        |                     |                        |                      |

|    |                             |                    |                        |                     |                        |                     |
|----|-----------------------------|--------------------|------------------------|---------------------|------------------------|---------------------|
| 1  |                             |                    |                        |                     |                        |                     |
| 2  |                             |                    |                        |                     |                        |                     |
| 3  |                             |                    |                        |                     |                        |                     |
| 4  |                             |                    |                        |                     |                        |                     |
| 5  |                             |                    |                        |                     |                        |                     |
| 6  | Southeast Asia              | 0.45 (0.42-491.19) | 152.65 (140.55-165.93) | 1.43 (1.31-1547.89) | 227.98 (210.24-246.38) | 1.4 (1.37 to 1.44)  |
| 7  |                             |                    |                        |                     |                        |                     |
| 8  | Central Sub-Saharan Africa  | 0.03 (0.03-30.16)  | 93.07 (86.17-100.24)   | 0.08 (0.08-89.02)   | 125.99 (115.7-136.67)  | 1.11 (1.01 to 1.2)  |
| 9  |                             |                    |                        |                     |                        |                     |
| 10 | Eastern Sub-Saharan Africa  | 0.09 (0.09-99.99)  | 94.39 (87.18-102.21)   | 0.24 (0.22-258.06)  | 119.54 (109.76-130.11) | 0.86 (0.78 to 0.93) |
| 11 |                             |                    |                        |                     |                        |                     |
| 12 |                             |                    |                        |                     |                        |                     |
| 13 | Southern Sub-Saharan Africa | 0.05 (0.05-57.56)  | 168.63 (154.1-184.7)   | 0.14 (0.13-149.6)   | 231.14 (212.43-251.73) | 1.04 (0.85 to 1.23) |
| 14 |                             |                    |                        |                     |                        |                     |
| 15 | Western Sub-Saharan Africa  | 0.16 (0.15-168.99) | 137.2 (126.96-148.29)  | 0.44 (0.41-470.76)  | 181.8 (167.29-197.54)  | 1.13 (1.01 to 1.24) |
| 16 |                             |                    |                        |                     |                        |                     |
| 17 |                             |                    |                        |                     |                        |                     |
| 18 |                             |                    |                        |                     |                        |                     |
| 19 |                             |                    |                        |                     |                        |                     |
| 20 |                             |                    |                        |                     |                        |                     |
| 21 |                             |                    |                        |                     |                        |                     |
| 22 |                             |                    |                        |                     |                        |                     |
| 23 |                             |                    |                        |                     |                        |                     |
| 24 |                             |                    |                        |                     |                        |                     |
| 25 |                             |                    |                        |                     |                        |                     |
| 26 |                             |                    |                        |                     |                        |                     |
| 27 |                             |                    |                        |                     |                        |                     |
| 28 |                             |                    |                        |                     |                        |                     |
| 29 |                             |                    |                        |                     |                        |                     |
| 30 |                             |                    |                        |                     |                        |                     |
| 31 |                             |                    |                        |                     |                        |                     |
| 32 |                             |                    |                        |                     |                        |                     |
| 33 |                             |                    |                        |                     |                        |                     |
| 34 |                             |                    |                        |                     |                        |                     |
| 35 |                             |                    |                        |                     |                        |                     |
| 36 |                             |                    |                        |                     |                        |                     |
| 37 |                             |                    |                        |                     |                        |                     |
| 38 |                             |                    |                        |                     |                        |                     |
| 39 |                             |                    |                        |                     |                        |                     |
| 40 |                             |                    |                        |                     |                        |                     |
| 41 |                             |                    |                        |                     |                        |                     |
| 42 |                             |                    |                        |                     |                        |                     |
| 43 |                             |                    |                        |                     |                        |                     |
| 44 |                             |                    |                        |                     |                        |                     |
| 45 |                             |                    |                        |                     |                        |                     |
| 46 |                             |                    |                        |                     |                        |                     |

1  
2  
3  
4  
5  
6  
7  
8  
9  
10  
11  
12  
13  
14  
15  
16  
17  
18  
19  
20  
21  
22  
23  
24  
25  
26  
27  
28  
29  
30  
31  
32  
33  
34  
35  
36  
37  
38  
39  
40  
41  
42  
43  
44  
45  
46

**Supplemental table 3. DALYs and age-standardized DALYs rate (ASR-DALYs) of chronic kidney disease in 1990 and 2019, and the temporal trends from 1990 to 2019 in global and regions.**

For peer review only

| Characteristics               | 1990                               |                                           | 2019                               |                                           | 1990-2019                  |
|-------------------------------|------------------------------------|-------------------------------------------|------------------------------------|-------------------------------------------|----------------------------|
|                               | DALYs (*10 <sup>6</sup> ) (95% UI) | ASR-DALYs per 100,000 population (95% UI) | DALYs (*10 <sup>6</sup> ) (95% UI) | ASR-DALYs per 100,000 population (95% UI) | EAPC of ASR-DALYs (95% CI) |
| Global                        | 21.5 (20.04-23065.78)              | 484.46 (452.28-518.67)                    | 41.54 (38.29-45037.86)             | 514.86 (474.91-558.86)                    | 0.31 (0.23 to 0.38)        |
| <b>Gender</b>                 |                                    |                                           |                                    |                                           |                            |
| Males                         | 11.2 (10.4-12.15)                  | 537.61 (499.52-580.01)                    | 21.98 (20.14-23.97)                | 574.23 (527.52-625.27)                    | 0.35 (0.27 to 0.43)        |
| Females                       | 10.3 (9.46-11.22)                  | 443.69 (409.36-481.56)                    | 19.56 (17.7-21.47)                 | 463.61 (419.34-509.95)                    | 0.21 (0.15 to 0.28)        |
| <b>Sociodemographic index</b> |                                    |                                           |                                    |                                           |                            |
| Low                           | 2.45 (2.18-2728.52)                | 734.23 (667.32-804.58)                    | 4.73 (4.21-5276.93)                | 682.18 (615.56-752.04)                    | -0.24 (-0.28 to -0.21)     |
| Low-middle                    | 5.05 (4.56-5598.22)                | 649.9 (591.82-714.59)                     | 9.91 (8.98-10820.22)               | 664.18 (603.21-723.92)                    | 0.1 (0 to 0.21)            |
| Middle                        | 7.55 (7.02-8112.98)                | 601.87 (560.14-645.51)                    | 15.44 (14.17-16837.37)             | 621.93 (570.74-676.64)                    | 0.27 (0.21 to 0.33)        |
| High-middle                   | 3.89 (3.6-4213.22)                 | 360.16 (332.75-390.43)                    | 6.05 (5.49-6665.14)                | 320.68 (290.18-353.73)                    | -0.36 (-0.46 to -0.27)     |
| High                          | 2.54 (2.33-2787.23)                | 254.32 (232.26-279.43)                    | 5.38 (4.87-5884.31)                | 304.13 (274.09-335.44)                    | 0.8 (0.72 to 0.89)         |
| <b>21 GBD regions</b>         |                                    |                                           |                                    |                                           |                            |
| Central Asia                  | 0.23 (0.22-256.33)                 | 397.89 (367.64-442.65)                    | 0.43 (0.39-481.73)                 | 506.72 (456.51-562.2)                     | 0.48 (0.16 to 0.79)        |



|    |                              |                     |                        |                     |                           |                        |
|----|------------------------------|---------------------|------------------------|---------------------|---------------------------|------------------------|
| 1  |                              |                     |                        |                     |                           |                        |
| 2  |                              |                     |                        |                     |                           |                        |
| 3  |                              |                     |                        |                     |                           |                        |
| 4  |                              |                     |                        |                     |                           |                        |
| 5  |                              |                     |                        |                     |                           |                        |
| 6  | Central Europe               | 0.41 (0.38-437.53)  | 297.3 (278.39-317.88)  | 0.46 (0.4-523.54)   | 243.84 (212.01-278.04)    | -0.62 (-0.69 to -0.55) |
| 7  |                              |                     |                        |                     |                           |                        |
| 8  | Eastern Europe               | 0.49 (0.45-547.25)  | 197 (177.48-218.85)    | 0.56 (0.49-638.34)  | 196.77 (170.51-224.02)    | -0.51 (-0.73 to -0.28) |
| 9  |                              |                     |                        |                     |                           |                        |
| 10 | Australasia                  | 0.04 (0.04-48.98)   | 196.75 (180.03-215.38) | 0.1 (0.09-115.71)   | 214.3 (191.2-238.39)      | 0.45 (0.4 to 0.5)      |
| 11 |                              |                     |                        |                     |                           |                        |
| 12 | High-income Asia Pacific     | 0.59 (0.55-642.57)  | 310.61 (285.7-334.9)   | 0.96 (0.84-1067.61) | 218.58 (192.71-243.9)     | -1.16 (-1.21 to -1.1)  |
| 13 |                              |                     |                        |                     |                           |                        |
| 14 | High-income North America    | 0.93 (0.85-1032.34) | 273.54 (247.51-303.34) | 2.42 (2.22-2641.09) | 413.63 (379.73-450.68)    | 1.69 (1.51 to 1.88)    |
| 15 |                              |                     |                        |                     |                           |                        |
| 16 | Southern Latin America       | 0.23 (0.22-245.13)  | 501.82 (472.93-530.86) | 0.44 (0.41-472.11)  | 540.08 (500.88-579.63)    | 0.25 (0.02 to 0.48)    |
| 17 |                              |                     |                        |                     |                           |                        |
| 18 | Western Europe               | 1.08 (0.99-1188.03) | 197.18 (179.66-216.97) | 1.75 (1.56-1921.1)  | 186.58 (166.88-208.38)    | -0.04 (-0.09 to 0.02)  |
| 19 |                              |                     |                        |                     |                           |                        |
| 20 | Andean Latin America         | 0.18 (0.17-196.15)  | 680.42 (626.59-742.08) | 0.48 (0.4-564.87)   | 836.34 (704.25-981.59)    | 0.84 (0.59 to 1.1)     |
| 21 |                              |                     |                        |                     |                           |                        |
| 22 | Caribbean                    | 0.17 (0.16-189.99)  | 587 (541.65-647.03)    | 0.39 (0.34-454.01)  | 774.89 (668-896.08)       | 1.32 (1.22 to 1.42)    |
| 23 |                              |                     |                        |                     |                           |                        |
| 24 | Central Latin America        | 0.78 (0.72-840.29)  | 739.23 (689.04-794.6)  | 3.28 (2.92-3697.82) | 1348.14 (1203.58-1521.61) | 2.3 (2.01 to 2.59)     |
| 25 |                              |                     |                        |                     |                           |                        |
| 26 | Tropical Latin America       | 0.61 (0.58-650.99)  | 559.23 (528.14-592.5)  | 1.24 (1.15-1332.95) | 513.36 (476.05-553.4)     | -0.37 (-0.46 to -0.29) |
| 27 |                              |                     |                        |                     |                           |                        |
| 28 | North Africa and Middle East | 1.77 (1.62-1930.04) | 834.93 (762.27-947.15) | 3.38 (2.92-3897.91) | 744.36 (646.14-851.75)    | -0.37 (-0.43 to -0.31) |
| 29 |                              |                     |                        |                     |                           |                        |
| 30 | South Asia                   | 4.69 (4.05-5324.9)  | 647.1 (557.75-731.83)  | 9.89 (8.8-11052.83) | 640.65 (568.76-715.48)    | -0.06 (-0.24 to 0.11)  |
| 31 |                              |                     |                        |                     |                           |                        |
| 32 | East Asia                    | 4.2 (3.73-4664.95)  | 416.47 (371.77-461.55) | 6.21 (5.36-7049.94) | 320.44 (277.88-362.19)    | -0.58 (-0.68 to -0.48) |
| 33 |                              |                     |                        |                     |                           |                        |
| 34 | Oceania                      | 0.03 (0.02-32.15)   | 664.24 (581.19-758.07) | 0.07 (0.06-83.48)   | 747.22 (629.25-880.16)    | 0.27 (0.09 to 0.44)    |
| 35 |                              |                     |                        |                     |                           |                        |
| 36 |                              |                     |                        |                     |                           |                        |
| 37 |                              |                     |                        |                     |                           |                        |
| 38 |                              |                     |                        |                     |                           |                        |
| 39 |                              |                     |                        |                     |                           |                        |
| 40 |                              |                     |                        |                     |                           |                        |
| 41 |                              |                     |                        |                     |                           |                        |
| 42 |                              |                     |                        |                     |                           |                        |
| 43 |                              |                     |                        |                     |                           |                        |
| 44 |                              |                     |                        |                     |                           |                        |
| 45 |                              |                     |                        |                     |                           |                        |
| 46 |                              |                     |                        |                     |                           |                        |

|    |                             |                     |                        |                     |                        |                        |
|----|-----------------------------|---------------------|------------------------|---------------------|------------------------|------------------------|
| 1  |                             |                     |                        |                     |                        |                        |
| 2  |                             |                     |                        |                     |                        |                        |
| 3  |                             |                     |                        |                     |                        |                        |
| 4  |                             |                     |                        |                     |                        |                        |
| 5  |                             |                     |                        |                     |                        |                        |
| 6  | Southeast Asia              | 2.7 (2.49-2945.17)  | 806.56 (741.95-875.79) | 5.11 (4.61-5673.54) | 796.69 (720.03-881.21) | -0.02 (-0.07 to 0.03)  |
| 7  |                             |                     |                        |                     |                        |                        |
| 8  | Central Sub-Saharan Africa  | 0.26 (0.22-303.29)  | 769.07 (656.59-891.05) | 0.46 (0.37-563.41)  | 635.98 (510.34-766.78) | -0.73 (-0.77 to -0.7)  |
| 9  |                             |                     |                        |                     |                        |                        |
| 10 | Eastern Sub-Saharan Africa  | 0.84 (0.71-949.63)  | 752.43 (668.49-837.88) | 1.4 (1.21-1581.03)  | 626.45 (557.9-698.14)  | -0.73 (-0.77 to -0.69) |
| 11 |                             |                     |                        |                     |                        |                        |
| 12 | Southern Sub-Saharan Africa | 0.22 (0.2-249.55)   | 636.93 (576.23-723.35) | 0.5 (0.45-545.96)   | 803.81 (733.62-878.51) | 0.94 (0.63 to 1.25)    |
| 13 |                             |                     |                        |                     |                        |                        |
| 14 | Western Sub-Saharan Africa  | 1.03 (0.87-1218.24) | 813.99 (702.78-957.03) | 2.01 (1.67-2371.3)  | 738.79 (627.78-857.08) | -0.27 (-0.3 to -0.23)  |
| 15 |                             |                     |                        |                     |                        |                        |
| 16 |                             |                     |                        |                     |                        |                        |
| 17 |                             |                     |                        |                     |                        |                        |
| 18 |                             |                     |                        |                     |                        |                        |
| 19 |                             |                     |                        |                     |                        |                        |
| 20 |                             |                     |                        |                     |                        |                        |
| 21 |                             |                     |                        |                     |                        |                        |
| 22 |                             |                     |                        |                     |                        |                        |
| 23 |                             |                     |                        |                     |                        |                        |
| 24 |                             |                     |                        |                     |                        |                        |
| 25 |                             |                     |                        |                     |                        |                        |
| 26 |                             |                     |                        |                     |                        |                        |
| 27 |                             |                     |                        |                     |                        |                        |
| 28 |                             |                     |                        |                     |                        |                        |
| 29 |                             |                     |                        |                     |                        |                        |
| 30 |                             |                     |                        |                     |                        |                        |
| 31 |                             |                     |                        |                     |                        |                        |
| 32 |                             |                     |                        |                     |                        |                        |
| 33 |                             |                     |                        |                     |                        |                        |
| 34 |                             |                     |                        |                     |                        |                        |
| 35 |                             |                     |                        |                     |                        |                        |
| 36 |                             |                     |                        |                     |                        |                        |
| 37 |                             |                     |                        |                     |                        |                        |
| 38 |                             |                     |                        |                     |                        |                        |
| 39 |                             |                     |                        |                     |                        |                        |
| 40 |                             |                     |                        |                     |                        |                        |
| 41 |                             |                     |                        |                     |                        |                        |
| 42 |                             |                     |                        |                     |                        |                        |
| 43 |                             |                     |                        |                     |                        |                        |
| 44 |                             |                     |                        |                     |                        |                        |
| 45 |                             |                     |                        |                     |                        |                        |
| 46 |                             |                     |                        |                     |                        |                        |

1  
2  
3  
4  
5  
6  
7  
8  
9  
10  
11  
12  
13  
14  
15  
16  
17  
18  
19  
20  
21  
22  
23  
24  
25  
26  
27  
28  
29  
30  
31  
32  
33  
34  
35  
36  
37  
38  
39  
40  
41  
42  
43  
44  
45  
46

**Supplemental table 4. Deaths and age-standardized death rate (ASDR) of chronic kidney disease in 1990 and 2019, and the temporal trends from 1990 to 2019 in 204 countries.**

| location            | Death cases in 1990 (*10 <sup>3</sup> ) | ASDR in 1990 (per 100,000 population) | Death cases in 2019 (*10 <sup>3</sup> ) | ASDR in 2019 (per 100,000 population) | EAPC of ASDR from 1990 to 2019 |
|---------------------|-----------------------------------------|---------------------------------------|-----------------------------------------|---------------------------------------|--------------------------------|
| Afghanistan         | 3.71 (2.82-5.06)                        | 55.94 (42.01-81.56)                   | 5.64 (4.33-7.92)                        | 49.37 (37.14-74.78)                   | -0.33 (-0.37 to -0.28)         |
| Albania             | 0.24 (0.22-0.26)                        | 11.53 (10.65-12.4)                    | 0.33 (0.25-0.42)                        | 8.24 (6.22-10.66)                     | -1.1 (-1.34 to -0.86)          |
| Algeria             | 3.56 (2.74-4.96)                        | 38.73 (30.35-52.07)                   | 8.2 (6.35-10.89)                        | 31.57 (24.78-41.16)                   | -0.5 (-0.67 to -0.33)          |
| American Samoa      | 0.01 (0.01-0.01)                        | 40.55 (34.26-46.31)                   | 0.03 (0.02-0.03)                        | 59.34 (51.03-69)                      | 1.41 (1.28 to 1.55)            |
| Andorra             | 0 (0-0.01)                              | 11.21 (8.79-14.36)                    | 0.02 (0.01-0.02)                        | 9.86 (7.46-12.24)                     | -0.39 (-0.57 to -0.2)          |
| Angola              | 1.06 (0.76-1.34)                        | 27.03 (19.77-33.28)                   | 2.46 (1.73-3.16)                        | 24.77 (17.36-31.37)                   | -0.37 (-0.42 to -0.33)         |
| Antigua and Barbuda | 0.01 (0.01-0.02)                        | 26.3 (23.81-28.66)                    | 0.04 (0.03-0.04)                        | 39.05 (33.55-45.31)                   | 1.69 (1.48 to 1.91)            |
| Argentina           | 7.13 (6.72-7.54)                        | 23.49 (22.02-24.9)                    | 15.66 (14.21-17.05)                     | 28.36 (25.83-30.9)                    | 0.57 (0.27 to 0.88)            |
| Armenia             | 0.07 (0.06-0.07)                        | 3.03 (2.76-3.3)                       | 0.45 (0.38-0.52)                        | 11.35 (9.53-13.22)                    | 4.65 (4.33 to 4.97)            |
| Australia           | 1.71 (1.56-1.83)                        | 9.49 (8.57-10.15)                     | 5.21 (4.29-5.89)                        | 10.75 (9.03-12.08)                    | 0.62 (0.51 to 0.74)            |

|    |                                  |                  |                     |                     |                     |                        |
|----|----------------------------------|------------------|---------------------|---------------------|---------------------|------------------------|
| 1  |                                  |                  |                     |                     |                     |                        |
| 2  |                                  |                  |                     |                     |                     |                        |
| 3  |                                  |                  |                     |                     |                     |                        |
| 4  |                                  |                  |                     |                     |                     |                        |
| 5  | Austria                          | 0.74 (0.68-0.79) | 6.13 (5.62-6.53)    | 3.37 (2.86-3.73)    | 14.87 (12.79-16.36) | 4.46 (3.94 to 4.98)    |
| 6  |                                  |                  |                     |                     |                     |                        |
| 7  |                                  |                  |                     |                     |                     |                        |
| 8  | Azerbaijan                       | 0.53 (0.47-0.59) | 9.6 (8.55-10.9)     | 1.39 (1.16-1.63)    | 17.85 (14.56-20.65) | 2.69 (2.23 to 3.16)    |
| 9  |                                  |                  |                     |                     |                     |                        |
| 10 | Bahamas                          | 0.04 (0.03-0.04) | 24.48 (22.11-26.99) | 0.11 (0.09-0.14)    | 30.35 (24.98-36.57) | 1.14 (0.98 to 1.3)     |
| 11 |                                  |                  |                     |                     |                     |                        |
| 12 |                                  |                  |                     |                     |                     |                        |
| 13 | Bahrain                          | 0.04 (0.04-0.05) | 38.45 (31.97-46.81) | 0.18 (0.14-0.22)    | 34.82 (27.94-42.19) | -0.09 (-0.63 to 0.45)  |
| 14 |                                  |                  |                     |                     |                     |                        |
| 15 |                                  |                  |                     |                     |                     |                        |
| 16 | Bangladesh                       | 7.7 (5.05-9.75)  | 13.66 (10.12-16.55) | 12.78 (10.18-15.68) | 10.9 (8.74-13.31)   | -0.56 (-0.91 to -0.2)  |
| 17 |                                  |                  |                     |                     |                     |                        |
| 18 | Barbados                         | 0.05 (0.05-0.06) | 18.45 (17.07-19.95) | 0.12 (0.1-0.14)     | 25.66 (21.37-30.06) | 1.14 (0.93 to 1.35)    |
| 19 |                                  |                  |                     |                     |                     |                        |
| 20 |                                  |                  |                     |                     |                     |                        |
| 21 | Belarus                          | 0.28 (0.26-0.29) | 2.32 (2.15-2.46)    | 0.5 (0.4-0.62)      | 3.2 (2.57-3.97)     | 1.48 (0.93 to 2.04)    |
| 22 |                                  |                  |                     |                     |                     |                        |
| 23 | Belgium                          | 1.42 (1.3-1.53)  | 9.13 (8.31-9.81)    | 2.96 (2.5-3.34)     | 9.89 (8.49-11.03)   | 0.38 (0.28 to 0.48)    |
| 24 |                                  |                  |                     |                     |                     |                        |
| 25 |                                  |                  |                     |                     |                     |                        |
| 26 | Belize                           | 0.02 (0.02-0.02) | 22.74 (20.41-25.07) | 0.11 (0.1-0.13)     | 40.49 (35.02-46.66) | 2.2 (1.72 to 2.69)     |
| 27 |                                  |                  |                     |                     |                     |                        |
| 28 |                                  |                  |                     |                     |                     |                        |
| 29 | Benin                            | 0.75 (0.64-0.87) | 35.15 (30.27-40.77) | 1.58 (1.19-2.06)    | 32.41 (25.19-40.64) | -0.15 (-0.23 to -0.07) |
| 30 |                                  |                  |                     |                     |                     |                        |
| 31 | Bermuda                          | 0.01 (0.01-0.01) | 16.94 (15.52-18.34) | 0.02 (0.02-0.02)    | 14.55 (12.11-17.38) | -0.18 (-0.35 to -0.01) |
| 32 |                                  |                  |                     |                     |                     |                        |
| 33 |                                  |                  |                     |                     |                     |                        |
| 34 | Bhutan                           | 0.06 (0.04-0.08) | 22.36 (14.86-31.31) | 0.15 (0.1-0.19)     | 28.1 (20.41-35.31)  | 0.86 (0.81 to 0.91)    |
| 35 |                                  |                  |                     |                     |                     |                        |
| 36 | Bolivia (Plurinational State of) | 1.23 (1.02-1.52) | 39.15 (32.12-49.14) | 4.42 (3.41-5.56)    | 55.89 (43.24-69.91) | 1.3 (1.23 to 1.38)     |
| 37 |                                  |                  |                     |                     |                     |                        |
| 38 |                                  |                  |                     |                     |                     |                        |
| 39 |                                  |                  |                     |                     |                     |                        |
| 40 |                                  |                  |                     |                     |                     |                        |
| 41 |                                  |                  |                     |                     |                     |                        |
| 42 |                                  |                  |                     |                     |                     |                        |
| 43 |                                  |                  |                     |                     |                     |                        |
| 44 |                                  |                  |                     |                     |                     |                        |
| 45 |                                  |                  |                     |                     |                     |                        |
| 46 |                                  |                  |                     |                     |                     |                        |

|    |                          |                    |                     |                     |                     |                        |
|----|--------------------------|--------------------|---------------------|---------------------|---------------------|------------------------|
| 1  |                          |                    |                     |                     |                     |                        |
| 2  |                          |                    |                     |                     |                     |                        |
| 3  |                          |                    |                     |                     |                     |                        |
| 4  |                          |                    |                     |                     |                     |                        |
| 5  | Bosnia and Herzegovina   | 0.34 (0.32-0.36)   | 9.3 (8.68-9.91)     | 0.66 (0.53-0.8)     | 11.56 (9.29-14.09)  | 0.8 (0.55 to 1.05)     |
| 6  |                          |                    |                     |                     |                     |                        |
| 7  |                          |                    |                     |                     |                     |                        |
| 8  | Botswana                 | 0.14 (0.1-0.19)    | 27.26 (20.38-37.49) | 0.44 (0.31-0.61)    | 37.05 (26.41-49.7)  | 0.64 (0.29 to 0.99)    |
| 9  |                          |                    |                     |                     |                     |                        |
| 10 | Brazil                   | 16.25 (15.53-16.8) | 19.48 (18.27-20.26) | 42.34 (38.66-44.67) | 18.6 (16.9-19.66)   | -0.09 (-0.17 to -0.02) |
| 11 |                          |                    |                     |                     |                     |                        |
| 12 |                          |                    |                     |                     |                     |                        |
| 13 | Brunei Darussalam        | 0.03 (0.03-0.03)   | 36.65 (32.22-41.02) | 0.08 (0.07-0.09)    | 37 (32.83-41.35)    | 0.74 (0.49 to 0.99)    |
| 14 |                          |                    |                     |                     |                     |                        |
| 15 |                          |                    |                     |                     |                     |                        |
| 16 | Bulgaria                 | 0.75 (0.7-0.79)    | 6.89 (6.49-7.29)    | 1.95 (1.58-2.38)    | 14.23 (11.57-17.43) | 2.68 (2.32 to 3.05)    |
| 17 |                          |                    |                     |                     |                     |                        |
| 18 | Burkina Faso             | 1.25 (1.03-1.48)   | 30.19 (25.23-35.72) | 2.82 (2.28-3.4)     | 30.98 (25.71-36.7)  | 0.03 (-0.07 to 0.13)   |
| 19 |                          |                    |                     |                     |                     |                        |
| 20 |                          |                    |                     |                     |                     |                        |
| 21 | Burundi                  | 0.74 (0.58-0.94)   | 31.09 (24.22-39.09) | 1.04 (0.81-1.33)    | 25.11 (19.84-31.23) | -1 (-1.1 to -0.9)      |
| 22 |                          |                    |                     |                     |                     |                        |
| 23 |                          |                    |                     |                     |                     |                        |
| 24 | Cabo Verde               | 0.04 (0.03-0.04)   | 15.38 (13.65-18.09) | 0.1 (0.09-0.12)     | 24.42 (21.5-27.42)  | 0.8 (0.48 to 1.12)     |
| 25 |                          |                    |                     |                     |                     |                        |
| 26 | Cambodia                 | 1.17 (0.97-1.38)   | 23.11 (19.27-27.26) | 2.19 (1.77-2.6)     | 19.77 (16.16-22.88) | -0.64 (-0.73 to -0.56) |
| 27 |                          |                    |                     |                     |                     |                        |
| 28 |                          |                    |                     |                     |                     |                        |
| 29 | Cameroon                 | 1.93 (1.49-2.38)   | 46.32 (35.64-56.56) | 4.78 (3.53-6.3)     | 42.01 (31.74-53.82) | -0.29 (-0.36 to -0.22) |
| 30 |                          |                    |                     |                     |                     |                        |
| 31 | Canada                   | 2.64 (2.38-2.83)   | 8.44 (7.58-9.05)    | 7.5 (6.43-8.41)     | 9.67 (8.4-10.78)    | 0.22 (0.1 to 0.34)     |
| 32 |                          |                    |                     |                     |                     |                        |
| 33 |                          |                    |                     |                     |                     |                        |
| 34 | Central African Republic | 0.36 (0.27-0.45)   | 31.47 (23.87-38.91) | 0.65 (0.48-0.86)    | 31.44 (23.07-40.76) | 0.05 (-0.07 to 0.16)   |
| 35 |                          |                    |                     |                     |                     |                        |
| 36 | Chad                     | 0.92 (0.71-1.28)   | 31.71 (24.21-44.14) | 1.82 (1.36-2.4)     | 31.47 (24.21-40.94) | 0.04 (-0.05 to 0.14)   |
| 37 |                          |                    |                     |                     |                     |                        |
| 38 |                          |                    |                     |                     |                     |                        |
| 39 |                          |                    |                     |                     |                     |                        |
| 40 |                          |                    |                     |                     |                     |                        |
| 41 |                          |                    |                     |                     |                     |                        |
| 42 |                          |                    |                     |                     |                     |                        |
| 43 |                          |                    |                     |                     |                     |                        |
| 44 |                          |                    |                     |                     |                     |                        |
| 45 |                          |                    |                     |                     |                     |                        |
| 46 |                          |                    |                     |                     |                     |                        |

|    |                                       |                     |                     |                        |                     |                        |
|----|---------------------------------------|---------------------|---------------------|------------------------|---------------------|------------------------|
| 1  |                                       |                     |                     |                        |                     |                        |
| 2  |                                       |                     |                     |                        |                     |                        |
| 3  |                                       |                     |                     |                        |                     |                        |
| 4  |                                       |                     |                     |                        |                     |                        |
| 5  | Chile                                 | 1.35 (1.28-1.42)    | 15.12 (14.14-15.91) | 5.04 (4.47-5.49)       | 21.2 (18.81-23.09)  | 1.54 (1.18 to 1.91)    |
| 6  |                                       |                     |                     |                        |                     |                        |
| 7  |                                       |                     |                     |                        |                     |                        |
| 8  | China                                 | 98.61 (86.8-111.08) | 12.98 (11.52-14.53) | 196.73 (168.24-224.68) | 11.23 (9.63-12.77)  | -0.21 (-0.32 to -0.09) |
| 9  |                                       |                     |                     |                        |                     |                        |
| 10 | Colombia                              | 3.56 (3.35-3.74)    | 21.24 (19.51-22.52) | 9.5 (7.33-11.97)       | 17.48 (13.59-22.1)  | -0.65 (-0.81 to -0.5)  |
| 11 |                                       |                     |                     |                        |                     |                        |
| 12 |                                       |                     |                     |                        |                     |                        |
| 13 | Comoros                               | 0.06 (0.04-0.08)    | 28.88 (19.76-36.55) | 0.12 (0.1-0.14)        | 26.32 (22.01-31.51) | -0.51 (-0.64 to -0.38) |
| 14 |                                       |                     |                     |                        |                     |                        |
| 15 | Congo                                 | 0.37 (0.26-0.46)    | 36.99 (26.02-46.61) | 0.7 (0.48-0.92)        | 31.9 (21.82-40.63)  | -0.68 (-0.79 to -0.56) |
| 16 |                                       |                     |                     |                        |                     |                        |
| 17 |                                       |                     |                     |                        |                     |                        |
| 18 | Cook Islands                          | 0 (0-0)             | 23.6 (19.81-27.56)  | 0.01 (0.01-0.01)       | 29.72 (24.86-35)    | 0.99 (0.9 to 1.07)     |
| 19 |                                       |                     |                     |                        |                     |                        |
| 20 | Costa Rica                            | 0.26 (0.24-0.27)    | 14.97 (13.7-16.1)   | 1.37 (1.08-1.71)       | 26.61 (20.83-33.09) | 1.89 (1.41 to 2.37)    |
| 21 |                                       |                     |                     |                        |                     |                        |
| 22 |                                       |                     |                     |                        |                     |                        |
| 23 | Croatia                               | 0.43 (0.39-0.46)    | 7.27 (6.69-7.85)    | 0.92 (0.74-1.14)       | 9.7 (7.84-11.9)     | 0.93 (0.56 to 1.3)     |
| 24 |                                       |                     |                     |                        |                     |                        |
| 25 |                                       |                     |                     |                        |                     |                        |
| 26 | Cuba                                  | 0.82 (0.77-0.86)    | 7.98 (7.53-8.38)    | 2.73 (2.24-3.32)       | 14.43 (11.8-17.53)  | 2.61 (2.35 to 2.86)    |
| 27 |                                       |                     |                     |                        |                     |                        |
| 28 |                                       |                     |                     |                        |                     |                        |
| 29 | Cyprus                                | 0.18 (0.16-0.21)    | 33.7 (29.01-39.16)  | 0.33 (0.29-0.38)       | 20.62 (17.88-23.26) | -2.01 (-2.19 to -1.83) |
| 30 |                                       |                     |                     |                        |                     |                        |
| 31 | Czechia                               | 1.08 (1.03-1.13)    | 8.09 (7.7-8.44)     | 1.32 (1.07-1.56)       | 6 (4.88-7.14)       | -0.94 (-1.08 to -0.8)  |
| 32 |                                       |                     |                     |                        |                     |                        |
| 33 |                                       |                     |                     |                        |                     |                        |
| 34 | Democratic People's Republic of Korea | 2.38 (1.86-2.97)    | 15.72 (12.48-19.16) | 4.32 (3.51-5.28)       | 14.24 (11.58-17.26) | -0.28 (-0.41 to -0.14) |
| 35 |                                       |                     |                     |                        |                     |                        |
| 36 | Democratic Republic of the Congo      | 4.42 (3.69-5.24)    | 30.47 (25.83-35.58) | 8.03 (6.4-9.93)        | 24.79 (19.49-30.7)  | -0.81 (-0.85 to -0.77) |
| 37 |                                       |                     |                     |                        |                     |                        |
| 38 |                                       |                     |                     |                        |                     |                        |
| 39 |                                       |                     |                     |                        |                     |                        |
| 40 |                                       |                     |                     |                        |                     |                        |
| 41 |                                       |                     |                     |                        |                     |                        |
| 42 |                                       |                     |                     |                        |                     |                        |
| 43 |                                       |                     |                     |                        |                     |                        |
| 44 |                                       |                     |                     |                        |                     |                        |
| 45 |                                       |                     |                     |                        |                     |                        |
| 46 |                                       |                     |                     |                        |                     |                        |

|    |                    |                  |                     |                     |                     |                       |
|----|--------------------|------------------|---------------------|---------------------|---------------------|-----------------------|
| 1  |                    |                  |                     |                     |                     |                       |
| 2  |                    |                  |                     |                     |                     |                       |
| 3  |                    |                  |                     |                     |                     |                       |
| 4  |                    |                  |                     |                     |                     |                       |
| 5  | Denmark            | 0.37 (0.34-0.4)  | 4.43 (4.05-4.75)    | 1.13 (0.98-1.26)    | 8.8 (7.65-9.71)     | 2.37 (1.93 to 2.8)    |
| 6  |                    |                  |                     |                     |                     |                       |
| 7  |                    |                  |                     |                     |                     |                       |
| 8  | Djibouti           | 0.03 (0.02-0.04) | 23.64 (17.63-30.82) | 0.14 (0.1-0.18)     | 28.41 (22.57-36.87) | 0.58 (0.48 to 0.68)   |
| 9  |                    |                  |                     |                     |                     |                       |
| 10 | Dominica           | 0.03 (0.02-0.03) | 35.66 (32.01-39.51) | 0.04 (0.04-0.05)    | 48.01 (39.68-57.88) | 1.35 (1.23 to 1.47)   |
| 11 |                    |                  |                     |                     |                     |                       |
| 12 |                    |                  |                     |                     |                     |                       |
| 13 | Dominican Republic | 0.58 (0.52-0.65) | 15.07 (13.33-16.88) | 2.28 (1.69-3.04)    | 24.98 (18.71-33.09) | 2.79 (2.47 to 3.12)   |
| 14 |                    |                  |                     |                     |                     |                       |
| 15 | Ecuador            | 1.09 (1.02-1.15) | 20.77 (19.27-22.14) | 6.91 (5.55-8.62)    | 50.48 (40.61-62.49) | 3.43 (2.76 to 4.11)   |
| 16 |                    |                  |                     |                     |                     |                       |
| 17 |                    |                  |                     |                     |                     |                       |
| 18 | Egypt              | 9.72 (6.8-11.83) | 39.39 (27.32-49.32) | 21.98 (12.86-31.56) | 43.93 (26.96-61.79) | 0.54 (0.44 to 0.64)   |
| 19 |                    |                  |                     |                     |                     |                       |
| 20 |                    |                  |                     |                     |                     |                       |
| 21 | El Salvador        | 0.62 (0.58-0.67) | 20.12 (18.68-21.65) | 4.08 (3.09-5.23)    | 67.31 (50.85-86.63) | 4.43 (3.7 to 5.16)    |
| 22 |                    |                  |                     |                     |                     |                       |
| 23 | Equatorial Guinea  | 0.06 (0.04-0.07) | 29.32 (21.77-37.03) | 0.14 (0.1-0.19)     | 32.78 (23.73-43.75) | 0.54 (0.39 to 0.69)   |
| 24 |                    |                  |                     |                     |                     |                       |
| 25 |                    |                  |                     |                     |                     |                       |
| 26 | Eritrea            | 0.25 (0.17-0.34) | 24.73 (15.94-35.35) | 0.66 (0.45-0.92)    | 27.87 (19.48-38.08) | 0.3 (0.14 to 0.46)    |
| 27 |                    |                  |                     |                     |                     |                       |
| 28 |                    |                  |                     |                     |                     |                       |
| 29 | Estonia            | 0.05 (0.05-0.06) | 2.72 (2.52-2.94)    | 0.35 (0.28-0.43)    | 11.33 (9.07-13.93)  | 5.36 (4.91 to 5.81)   |
| 30 |                    |                  |                     |                     |                     |                       |
| 31 | Eswatini           | 0.1 (0.08-0.13)  | 37.13 (29.77-45.05) | 0.27 (0.19-0.36)    | 51.29 (37.88-66.11) | 1.28 (0.67 to 1.89)   |
| 32 |                    |                  |                     |                     |                     |                       |
| 33 |                    |                  |                     |                     |                     |                       |
| 34 | Ethiopia           | 7.86 (6.41-9.38) | 39.59 (32.49-46.12) | 9.86 (8.58-11.29)   | 26.17 (22.48-30.08) | -1.62 (-1.7 to -1.55) |
| 35 |                    |                  |                     |                     |                     |                       |
| 36 | Fiji               | 0.12 (0.09-0.14) | 34.34 (28.19-43.41) | 0.29 (0.23-0.37)    | 46.74 (37.81-57.1)  | 0.55 (0.17 to 0.93)   |
| 37 |                    |                  |                     |                     |                     |                       |
| 38 |                    |                  |                     |                     |                     |                       |
| 39 |                    |                  |                     |                     |                     |                       |
| 40 |                    |                  |                     |                     |                     |                       |
| 41 |                    |                  |                     |                     |                     |                       |
| 42 |                    |                  |                     |                     |                     |                       |
| 43 |                    |                  |                     |                     |                     |                       |
| 44 |                    |                  |                     |                     |                     |                       |
| 45 |                    |                  |                     |                     |                     |                       |
| 46 |                    |                  |                     |                     |                     |                       |

|    |           |                  |                     |                     |                     |                        |
|----|-----------|------------------|---------------------|---------------------|---------------------|------------------------|
| 1  |           |                  |                     |                     |                     |                        |
| 2  |           |                  |                     |                     |                     |                        |
| 3  |           |                  |                     |                     |                     |                        |
| 4  |           |                  |                     |                     |                     |                        |
| 5  | Finland   | 0.21 (0.2-0.23)  | 3.08 (2.8-3.3)      | 0.71 (0.59-0.79)    | 4.69 (4.01-5.26)    | 2.13 (1.9 to 2.37)     |
| 6  |           |                  |                     |                     |                     |                        |
| 7  |           |                  |                     |                     |                     |                        |
| 8  | France    | 7.12 (6.35-7.72) | 7.99 (7.12-8.64)    | 12.7 (10.29-14.62)  | 6.59 (5.48-7.46)    | -0.39 (-0.52 to -0.26) |
| 9  |           |                  |                     |                     |                     |                        |
| 10 | Gabon     | 0.18 (0.13-0.23) | 35.51 (25.47-44.37) | 0.37 (0.23-0.48)    | 41.2 (25.46-53.69)  | 0.46 (0.25 to 0.67)    |
| 11 |           |                  |                     |                     |                     |                        |
| 12 |           |                  |                     |                     |                     |                        |
| 13 | Gambia    | 0.11 (0.08-0.14) | 31.8 (25.23-39.71)  | 0.31 (0.24-0.39)    | 33.3 (27.05-40.97)  | 0.1 (-0.01 to 0.22)    |
| 14 |           |                  |                     |                     |                     |                        |
| 15 | Georgia   | 0.35 (0.31-0.39) | 6.2 (5.54-6.88)     | 0.71 (0.59-0.82)    | 11.89 (9.98-13.83)  | 3.59 (2.83 to 4.35)    |
| 16 |           |                  |                     |                     |                     |                        |
| 17 |           |                  |                     |                     |                     |                        |
| 18 | Germany   | 9.35 (8.69-9.9)  | 7.04 (6.55-7.43)    | 35.22 (30.38-39.03) | 14.7 (12.69-16.19)  | 3.54 (3.2 to 3.89)     |
| 19 |           |                  |                     |                     |                     |                        |
| 20 |           |                  |                     |                     |                     |                        |
| 21 | Ghana     | 1.66 (1.25-2.22) | 27.97 (21.27-36.97) | 4.68 (3.38-5.96)    | 31.79 (23.14-39.85) | 0.55 (0.44 to 0.66)    |
| 22 |           |                  |                     |                     |                     |                        |
| 23 | Greece    | 2.95 (2.71-3.17) | 20.63 (18.81-22.08) | 4.6 (4.02-5.09)     | 14.96 (13.36-16.41) | -1.62 (-2.08 to -1.16) |
| 24 |           |                  |                     |                     |                     |                        |
| 25 |           |                  |                     |                     |                     |                        |
| 26 | Greenland | 0 (0-0)          | 13.2 (11.48-15.22)  | 0.01 (0.01-0.01)    | 13.87 (11.51-16.31) | 0.22 (0.11 to 0.34)    |
| 27 |           |                  |                     |                     |                     |                        |
| 28 | Grenada   | 0.03 (0.02-0.03) | 34.89 (31.52-38.34) | 0.05 (0.04-0.06)    | 47.49 (41.83-52.74) | 1.47 (1.3 to 1.64)     |
| 29 |           |                  |                     |                     |                     |                        |
| 30 |           |                  |                     |                     |                     |                        |
| 31 | Guam      | 0.01 (0.01-0.02) | 24.88 (21.94-27.8)  | 0.06 (0.05-0.07)    | 29.97 (25.2-35.61)  | 0.9 (0.61 to 1.19)     |
| 32 |           |                  |                     |                     |                     |                        |
| 33 |           |                  |                     |                     |                     |                        |
| 34 | Guatemala | 1.14 (1.02-1.27) | 32.23 (28.9-35.79)  | 6.02 (4.81-7.5)     | 57.06 (46.4-70.3)   | 2.65 (2.29 to 3.01)    |
| 35 |           |                  |                     |                     |                     |                        |
| 36 | Guinea    | 1.25 (1.01-1.59) | 37.28 (30.01-47.69) | 1.93 (1.51-2.42)    | 34.24 (27.19-42.48) | -0.1 (-0.17 to -0.02)  |
| 37 |           |                  |                     |                     |                     |                        |
| 38 |           |                  |                     |                     |                     |                        |
| 39 |           |                  |                     |                     |                     |                        |
| 40 |           |                  |                     |                     |                     |                        |
| 41 |           |                  |                     |                     |                     |                        |
| 42 |           |                  |                     |                     |                     |                        |
| 43 |           |                  |                     |                     |                     |                        |
| 44 |           |                  |                     |                     |                     |                        |
| 45 |           |                  |                     |                     |                     |                        |
| 46 |           |                  |                     |                     |                     |                        |



|    |                            |                      |                     |                        |                     |                        |
|----|----------------------------|----------------------|---------------------|------------------------|---------------------|------------------------|
| 1  |                            |                      |                     |                        |                     |                        |
| 2  |                            |                      |                     |                        |                     |                        |
| 3  |                            |                      |                     |                        |                     |                        |
| 4  |                            |                      |                     |                        |                     |                        |
| 5  | Guinea-Bissau              | 0.21 (0.17-0.27)     | 50.78 (40.95-61.44) | 0.29 (0.23-0.36)       | 40.52 (32.1-49.72)  | -0.74 (-0.78 to -0.7)  |
| 6  |                            |                      |                     |                        |                     |                        |
| 7  |                            |                      |                     |                        |                     |                        |
| 8  | Guyana                     | 0.11 (0.1-0.13)      | 29.17 (25.4-33.04)  | 0.28 (0.22-0.36)       | 47.17 (37.07-58.98) | 2.38 (2.15 to 2.61)    |
| 9  |                            |                      |                     |                        |                     |                        |
| 10 | Haiti                      | 1.18 (0.91-1.64)     | 34.39 (26-50.81)    | 2.37 (1.67-3.61)       | 34.33 (24.49-52.97) | 0.32 (0.18 to 0.47)    |
| 11 |                            |                      |                     |                        |                     |                        |
| 12 |                            |                      |                     |                        |                     |                        |
| 13 | Honduras                   | 0.56 (0.45-0.78)     | 26.05 (20.21-38.44) | 3.16 (2.57-4.03)       | 55.87 (45.6-71.19)  | 3.09 (2.81 to 3.37)    |
| 14 |                            |                      |                     |                        |                     |                        |
| 15 |                            |                      |                     |                        |                     |                        |
| 16 | Hungary                    | 0.78 (0.74-0.82)     | 5.84 (5.51-6.11)    | 1.82 (1.52-2.17)       | 8.92 (7.43-10.6)    | 2.57 (2.18 to 2.97)    |
| 17 |                            |                      |                     |                        |                     |                        |
| 18 | Iceland                    | 0.01 (0.01-0.01)     | 4.19 (3.74-4.58)    | 0.03 (0.03-0.04)       | 4.98 (4.14-5.69)    | 0.89 (0.75 to 1.03)    |
| 19 |                            |                      |                     |                        |                     |                        |
| 20 |                            |                      |                     |                        |                     |                        |
| 21 | India                      | 92.81 (79.36-104.72) | 22.76 (19.35-25.79) | 222.92 (191.55-258.59) | 20.92 (17.98-24.08) | -0.55 (-0.77 to -0.33) |
| 22 |                            |                      |                     |                        |                     |                        |
| 23 | Indonesia                  | 22.38 (20.04-24.93)  | 21.08 (18.79-23.69) | 42.13 (35.88-48.3)     | 20.95 (17.92-23.36) | 0 (-0.13 to 0.12)      |
| 24 |                            |                      |                     |                        |                     |                        |
| 25 |                            |                      |                     |                        |                     |                        |
| 26 | Iran (Islamic Republic of) | 5.27 (4.82-5.77)     | 24.11 (21.79-28.8)  | 12.55 (11.38-13.41)    | 19.77 (17.77-21.21) | -0.89 (-0.98 to -0.79) |
| 27 |                            |                      |                     |                        |                     |                        |
| 28 |                            |                      |                     |                        |                     |                        |
| 29 | Iraq                       | 3.46 (2.82-4.48)     | 46.27 (37.12-61.87) | 7.89 (6.16-10.08)      | 41.86 (33.19-53.49) | -0.42 (-0.48 to -0.35) |
| 30 |                            |                      |                     |                        |                     |                        |
| 31 | Ireland                    | 0.42 (0.39-0.44)     | 10.95 (10.02-11.65) | 0.7 (0.59-0.79)        | 8.89 (7.57-9.94)    | -0.71 (-0.79 to -0.64) |
| 32 |                            |                      |                     |                        |                     |                        |
| 33 |                            |                      |                     |                        |                     |                        |
| 34 | Israel                     | 0.96 (0.88-1.02)     | 21.9 (19.96-23.41)  | 2.76 (2.37-3.06)       | 21.48 (18.66-23.71) | 0.28 (-0.04 to 0.6)    |
| 35 |                            |                      |                     |                        |                     |                        |
| 36 | Italy                      | 8.39 (7.89-8.68)     | 9.78 (9.09-10.16)   | 16.51 (13.88-18.05)    | 8.6 (7.37-9.33)     | -0.17 (-0.31 to -0.04) |
| 37 |                            |                      |                     |                        |                     |                        |
| 38 |                            |                      |                     |                        |                     |                        |
| 39 |                            |                      |                     |                        |                     |                        |
| 40 |                            |                      |                     |                        |                     |                        |
| 41 |                            |                      |                     |                        |                     |                        |
| 42 |                            |                      |                     |                        |                     |                        |
| 43 |                            |                      |                     |                        |                     |                        |
| 44 |                            |                      |                     |                        |                     |                        |
| 45 |                            |                      |                     |                        |                     |                        |
| 46 |                            |                      |                     |                        |                     |                        |

|    |                                  |                     |                     |                     |                     |                        |
|----|----------------------------------|---------------------|---------------------|---------------------|---------------------|------------------------|
| 1  |                                  |                     |                     |                     |                     |                        |
| 2  |                                  |                     |                     |                     |                     |                        |
| 3  |                                  |                     |                     |                     |                     |                        |
| 4  |                                  |                     |                     |                     |                     |                        |
| 5  | Ivory Coast                      | 1.57 (1.27-1.87)    | 40.34 (33.8-47.23)  | 3.43 (2.59-4.33)    | 34.73 (28.03-42.22) | -0.61 (-0.73 to -0.49) |
| 6  |                                  |                     |                     |                     |                     |                        |
| 7  |                                  |                     |                     |                     |                     |                        |
| 8  | Jamaica                          | 0.43 (0.39-0.46)    | 23.34 (21.34-24.93) | 0.94 (0.76-1.15)    | 30.23 (24.24-37.39) | 0.3 (-0.21 to 0.82)    |
| 9  |                                  |                     |                     |                     |                     |                        |
| 10 | Japan                            | 19.48 (17.92-20.33) | 12.85 (11.7-13.48)  | 45.32 (35.35-51.15) | 8.87 (7.24-9.83)    | -1.44 (-1.54 to -1.34) |
| 11 |                                  |                     |                     |                     |                     |                        |
| 12 |                                  |                     |                     |                     |                     |                        |
| 13 | Jordan                           | 0.44 (0.37-0.51)    | 40.92 (34.47-48.38) | 1.81 (1.52-2.15)    | 36.65 (30.74-43.21) | -0.28 (-0.4 to -0.15)  |
| 14 |                                  |                     |                     |                     |                     |                        |
| 15 |                                  |                     |                     |                     |                     |                        |
| 16 | Kazakhstan                       | 0.97 (0.91-1.05)    | 7.34 (6.89-7.89)    | 1.87 (1.64-2.13)    | 11.79 (10.31-13.3)  | 1.12 (0.79 to 1.45)    |
| 17 |                                  |                     |                     |                     |                     |                        |
| 18 | Kenya                            | 1.62 (1.36-1.94)    | 20.91 (17.39-25.31) | 4.76 (3.99-5.64)    | 25.35 (21.47-29.6)  | 0.75 (0.67 to 0.82)    |
| 19 |                                  |                     |                     |                     |                     |                        |
| 20 |                                  |                     |                     |                     |                     |                        |
| 21 | Kiribati                         | 0.02 (0.01-0.02)    | 44.1 (36.16-52.87)  | 0.04 (0.03-0.05)    | 56.87 (43.53-72.81) | 0.6 (0.19 to 1.02)     |
| 22 |                                  |                     |                     |                     |                     |                        |
| 23 |                                  |                     |                     |                     |                     |                        |
| 24 | Kuwait                           | 0.14 (0.12-0.15)    | 27.67 (23.81-30.52) | 0.32 (0.27-0.39)    | 16.18 (13.28-19.5)  | -2.21 (-2.93 to -1.48) |
| 25 |                                  |                     |                     |                     |                     |                        |
| 26 | Kyrgyzstan                       | 0.43 (0.39-0.47)    | 12.46 (11.34-13.65) | 0.49 (0.42-0.56)    | 9.8 (8.54-11.16)    | -1.37 (-1.82 to -0.93) |
| 27 |                                  |                     |                     |                     |                     |                        |
| 28 |                                  |                     |                     |                     |                     |                        |
| 29 | Lao People's Democratic Republic | 1.08 (0.85-1.35)    | 50.84 (39.68-64.92) | 1.71 (1.31-2.18)    | 41.81 (32.97-51.98) | -0.85 (-0.92 to -0.78) |
| 30 |                                  |                     |                     |                     |                     |                        |
| 31 | Latvia                           | 0.08 (0.07-0.08)    | 2.33 (2.17-2.5)     | 0.26 (0.22-0.32)    | 6.22 (5.25-7.5)     | 4.52 (4 to 5.05)       |
| 32 |                                  |                     |                     |                     |                     |                        |
| 33 |                                  |                     |                     |                     |                     |                        |
| 34 | Lebanon                          | 0.62 (0.52-0.75)    | 32.44 (27.01-39.57) | 1.18 (0.85-1.53)    | 23.32 (16.78-30.26) | -1.11 (-1.25 to -0.97) |
| 35 |                                  |                     |                     |                     |                     |                        |
| 36 | Lesotho                          | 0.22 (0.18-0.28)    | 24.49 (20.02-29.91) | 0.56 (0.4-0.73)     | 49.32 (35.95-62.73) | 3.04 (2.73 to 3.35)    |
| 37 |                                  |                     |                     |                     |                     |                        |
| 38 |                                  |                     |                     |                     |                     |                        |
| 39 |                                  |                     |                     |                     |                     |                        |
| 40 |                                  |                     |                     |                     |                     |                        |
| 41 |                                  |                     |                     |                     |                     |                        |
| 42 |                                  |                     |                     |                     |                     |                        |
| 43 |                                  |                     |                     |                     |                     |                        |
| 44 |                                  |                     |                     |                     |                     |                        |
| 45 |                                  |                     |                     |                     |                     |                        |
| 46 |                                  |                     |                     |                     |                     |                        |

|    |                  |                  |                     |                  |                     |                        |
|----|------------------|------------------|---------------------|------------------|---------------------|------------------------|
| 1  |                  |                  |                     |                  |                     |                        |
| 2  |                  |                  |                     |                  |                     |                        |
| 3  |                  |                  |                     |                  |                     |                        |
| 4  |                  |                  |                     |                  |                     |                        |
| 5  | Liberia          | 0.45 (0.37-0.55) | 41.82 (35.14-51.43) | 0.65 (0.47-0.9)  | 33.14 (25.24-45.08) | -0.58 (-0.85 to -0.32) |
| 6  |                  |                  |                     |                  |                     |                        |
| 7  |                  |                  |                     |                  |                     |                        |
| 8  | Libya            | 0.52 (0.4-0.66)  | 29.75 (22.44-39.08) | 1.37 (0.92-1.86) | 30.37 (20.49-41.27) | 0.33 (0.15 to 0.5)     |
| 9  |                  |                  |                     |                  |                     |                        |
| 10 | Lithuania        | 0.12 (0.11-0.12) | 2.66 (2.46-2.84)    | 0.26 (0.22-0.31) | 4.37 (3.64-5.24)    | 1.2 (0.62 to 1.78)     |
| 11 |                  |                  |                     |                  |                     |                        |
| 12 |                  |                  |                     |                  |                     |                        |
| 13 | Luxembourg       | 0.05 (0.05-0.06) | 10.12 (9.11-10.94)  | 0.12 (0.1-0.14)  | 10.19 (8.48-11.88)  | 0.23 (0.02 to 0.44)    |
| 14 |                  |                  |                     |                  |                     |                        |
| 15 | Madagascar       | 1.2 (0.94-1.49)  | 22.91 (17.82-29.06) | 1.94 (1.49-2.54) | 20.34 (15.74-26.54) | -0.49 (-0.56 to -0.42) |
| 16 |                  |                  |                     |                  |                     |                        |
| 17 |                  |                  |                     |                  |                     |                        |
| 18 | Malawi           | 1.04 (0.83-1.21) | 27.48 (23.76-31.57) | 1.78 (1.46-2.15) | 26.24 (21.93-31.13) | -0.28 (-0.42 to -0.14) |
| 19 |                  |                  |                     |                  |                     |                        |
| 20 |                  |                  |                     |                  |                     |                        |
| 21 | Malaysia         | 2.18 (2.01-2.37) | 24.78 (22.57-27.13) | 6.11 (4.87-7.45) | 25.56 (20.44-31)    | -0.47 (-0.73 to -0.22) |
| 22 |                  |                  |                     |                  |                     |                        |
| 23 | Maldives         | 0.04 (0.04-0.05) | 57.41 (49.94-68.83) | 0.09 (0.07-0.1)  | 33.8 (27.82-39.77)  | -2.22 (-2.46 to -1.97) |
| 24 |                  |                  |                     |                  |                     |                        |
| 25 |                  |                  |                     |                  |                     |                        |
| 26 | Mali             | 1.52 (1.21-1.91) | 37.05 (29.91-46.42) | 2.7 (2.07-3.46)  | 31.19 (25-38.82)    | -0.45 (-0.61 to -0.29) |
| 27 |                  |                  |                     |                  |                     |                        |
| 28 |                  |                  |                     |                  |                     |                        |
| 29 | Malta            | 0.05 (0.05-0.06) | 13.49 (12.13-14.67) | 0.11 (0.09-0.12) | 10.34 (8.85-11.81)  | -0.93 (-1.14 to -0.72) |
| 30 |                  |                  |                     |                  |                     |                        |
| 31 | Marshall Islands | 0.01 (0.01-0.01) | 39.58 (31.44-51.85) | 0.02 (0.01-0.02) | 53.39 (39.7-72.05)  | 1.04 (0.78 to 1.3)     |
| 32 |                  |                  |                     |                  |                     |                        |
| 33 |                  |                  |                     |                  |                     |                        |
| 34 | Mauritania       | 0.45 (0.38-0.53) | 47.02 (39-55.12)    | 0.59 (0.44-0.76) | 30.91 (23.68-38.57) | -1.45 (-1.52 to -1.37) |
| 35 |                  |                  |                     |                  |                     |                        |
| 36 | Mauritius        | 0.31 (0.29-0.33) | 44.68 (41.91-47.57) | 1.26 (1.03-1.53) | 75.03 (61.8-90.76)  | 2.09 (1.74 to 2.45)    |
| 37 |                  |                  |                     |                  |                     |                        |
| 38 |                  |                  |                     |                  |                     |                        |
| 39 |                  |                  |                     |                  |                     |                        |
| 40 |                  |                  |                     |                  |                     |                        |
| 41 |                  |                  |                     |                  |                     |                        |
| 42 |                  |                  |                     |                  |                     |                        |
| 43 |                  |                  |                     |                  |                     |                        |
| 44 |                  |                  |                     |                  |                     |                        |
| 45 |                  |                  |                     |                  |                     |                        |
| 46 |                  |                  |                     |                  |                     |                        |

|    |                                  |                     |                     |                    |                     |                        |
|----|----------------------------------|---------------------|---------------------|--------------------|---------------------|------------------------|
| 1  |                                  |                     |                     |                    |                     |                        |
| 2  |                                  |                     |                     |                    |                     |                        |
| 3  |                                  |                     |                     |                    |                     |                        |
| 4  |                                  |                     |                     |                    |                     |                        |
| 5  | Mexico                           | 12.18 (11.63-12.52) | 30.65 (28.76-31.74) | 72.54 (62.59-82.5) | 63.67 (55.02-72.25) | 2.85 (2.43 to 3.27)    |
| 6  |                                  |                     |                     |                    |                     |                        |
| 7  |                                  |                     |                     |                    |                     |                        |
| 8  | Micronesia (Federated States of) | 0.02 (0.02-0.03)    | 49.5 (39.15-64.24)  | 0.05 (0.03-0.06)   | 77.21 (57.56-97.54) | 1.45 (1.05 to 1.84)    |
| 9  |                                  |                     |                     |                    |                     |                        |
| 10 | Monaco                           | 0 (0-0)             | 4.16 (3.41-4.99)    | 0.01 (0.01-0.01)   | 6.28 (5.16-7.39)    | 1.83 (1.41 to 2.26)    |
| 11 |                                  |                     |                     |                    |                     |                        |
| 12 |                                  |                     |                     |                    |                     |                        |
| 13 | Mongolia                         | 0.39 (0.33-0.46)    | 35.49 (30.53-41)    | 0.39 (0.31-0.5)    | 17.81 (14.41-22.12) | -3.6 (-4.07 to -3.12)  |
| 14 |                                  |                     |                     |                    |                     |                        |
| 15 | Montenegro                       | 0.07 (0.07-0.08)    | 12.43 (11.17-13.87) | 0.13 (0.11-0.15)   | 13.82 (11.6-16.13)  | 0.55 (0.38 to 0.72)    |
| 16 |                                  |                     |                     |                    |                     |                        |
| 17 |                                  |                     |                     |                    |                     |                        |
| 18 | Morocco                          | 3.55 (3.03-4.63)    | 29.43 (24.56-41.35) | 9.32 (7.16-11.84)  | 35.84 (27.87-46.25) | 0.76 (0.62 to 0.89)    |
| 19 |                                  |                     |                     |                    |                     |                        |
| 20 | Mozambique                       | 1.24 (1.02-1.52)    | 22.84 (18.92-28.33) | 2.64 (2.08-3.28)   | 25.87 (21.06-32.1)  | 0.5 (0.37 to 0.63)     |
| 21 |                                  |                     |                     |                    |                     |                        |
| 22 |                                  |                     |                     |                    |                     |                        |
| 23 | Myanmar                          | 7.64 (5.94-9.5)     | 30.76 (24.01-38.16) | 11.55 (9.73-13.96) | 26.84 (23.21-32.3)  | -0.53 (-0.65 to -0.41) |
| 24 |                                  |                     |                     |                    |                     |                        |
| 25 |                                  |                     |                     |                    |                     |                        |
| 26 | Namibia                          | 0.18 (0.13-0.24)    | 27.85 (20.88-37.4)  | 0.35 (0.25-0.49)   | 27.4 (20-38.41)     | -0.39 (-0.75 to -0.02) |
| 27 |                                  |                     |                     |                    |                     |                        |
| 28 | Nauru                            | 0 (0-0)             | 49.17 (38.1-60.09)  | 0 (0-0)            | 66.61 (49.13-82.46) | 0.93 (0.61 to 1.25)    |
| 29 |                                  |                     |                     |                    |                     |                        |
| 30 |                                  |                     |                     |                    |                     |                        |
| 31 | Nepal                            | 1.73 (1.27-2.25)    | 18.15 (13.34-24.47) | 5.11 (3.58-6.71)   | 25.06 (17.71-32.79) | 1.23 (0.94 to 1.53)    |
| 32 |                                  |                     |                     |                    |                     |                        |
| 33 |                                  |                     |                     |                    |                     |                        |
| 34 | Netherlands                      | 1.68 (1.48-1.82)    | 8.42 (7.37-9.15)    | 3.78 (3.23-4.22)   | 9.8 (8.42-10.92)    | 0.67 (0.59 to 0.75)    |
| 35 |                                  |                     |                     |                    |                     |                        |
| 36 | New Zealand                      | 0.31 (0.28-0.33)    | 8.26 (7.56-8.83)    | 0.91 (0.79-1)      | 10.82 (9.52-11.82)  | 1.04 (0.82 to 1.27)    |
| 37 |                                  |                     |                     |                    |                     |                        |
| 38 |                                  |                     |                     |                    |                     |                        |
| 39 |                                  |                     |                     |                    |                     |                        |
| 40 |                                  |                     |                     |                    |                     |                        |
| 41 |                                  |                     |                     |                    |                     |                        |
| 42 |                                  |                     |                     |                    |                     |                        |
| 43 |                                  |                     |                     |                    |                     |                        |
| 44 |                                  |                     |                     |                    |                     |                        |
| 45 |                                  |                     |                     |                    |                     |                        |
| 46 |                                  |                     |                     |                    |                     |                        |

1  
2  
3  
4  
5  
6  
7  
8  
9  
10  
11  
12  
13  
14  
15  
16  
17  
18  
19  
20  
21  
22  
23  
24  
25  
26  
27  
28  
29  
30  
31  
32  
33  
34  
35  
36  
37  
38  
39  
40  
41  
42  
43  
44  
45  
46

|                          |                     |                     |                     |                     |                       |
|--------------------------|---------------------|---------------------|---------------------|---------------------|-----------------------|
| Nicaragua                | 0.61 (0.57-0.65)    | 37.62 (34.76-40.75) | 3.48 (2.87-4.09)    | 83.24 (69.57-96.75) | 3.14 (2.79 to 3.49)   |
| Niger                    | 1.07 (0.84-1.35)    | 35.2 (27.55-44.12)  | 2.2 (1.61-2.91)     | 28.69 (22.39-36.04) | -0.66 (-0.73 to -0.6) |
| Nigeria                  | 11.66 (9.42-14.85)  | 27.69 (22.51-35.07) | 20.04 (15.89-25.09) | 24.84 (20.27-30.37) | -0.3 (-0.36 to -0.23) |
| Niue                     | 0 (0-0)             | 35.72 (28.03-44.02) | 0 (0-0)             | 47.39 (34.47-59.33) | 0.85 (0.59 to 1.12)   |
| North Macedonia          | 0.19 (0.18-0.22)    | 11.25 (10.27-12.72) | 0.36 (0.29-0.45)    | 12.72 (10.34-15.66) | 0.3 (0.07 to 0.54)    |
| Northern Mariana Islands | 0.01 (0.01-0.01)    | 45.65 (39.08-54.81) | 0.02 (0.02-0.03)    | 56.84 (48.66-65.02) | 0.95 (0.85 to 1.06)   |
| Norway                   | 0.34 (0.31-0.36)    | 4.55 (4.2-4.77)     | 0.78 (0.67-0.84)    | 6.69 (5.84-7.25)    | 1.49 (1.18 to 1.8)    |
| Oman                     | 0.08 (0.06-0.11)    | 16.82 (12.93-22.29) | 0.2 (0.17-0.23)     | 19.85 (17.05-22.82) | 0.98 (0.78 to 1.17)   |
| Pakistan                 | 15.21 (11.34-20.54) | 26.34 (19.51-35.91) | 44.39 (32.45-56.53) | 39.88 (29.74-50.88) | 1.43 (1.17 to 1.7)    |
| Palau                    | 0.01 (0-0.01)       | 54.63 (45.05-68.31) | 0.01 (0.01-0.02)    | 69.74 (56.33-84.64) | 0.79 (0.59 to 1)      |
| Palestine                | 0.39 (0.31-0.48)    | 46.81 (37.83-57.37) | 0.65 (0.55-0.75)    | 33.58 (28.52-38.58) | -0.86 (-1.11 to -0.6) |
| Panama                   | 0.22 (0.2-0.24)     | 14.61 (13.34-15.73) | 1.15 (0.9-1.46)     | 27.39 (21.28-34.63) | 2.25 (1.89 to 2.61)   |
| Papua New Guinea         | 0.25 (0.2-0.31)     | 12.19 (9.8-14.71)   | 0.74 (0.56-0.95)    | 14.36 (11.09-17.95) | 0.51 (0.36 to 0.65)   |

|    |                       |                    |                     |                     |                     |                        |
|----|-----------------------|--------------------|---------------------|---------------------|---------------------|------------------------|
| 1  |                       |                    |                     |                     |                     |                        |
| 2  |                       |                    |                     |                     |                     |                        |
| 3  |                       |                    |                     |                     |                     |                        |
| 4  |                       |                    |                     |                     |                     |                        |
| 5  | Paraguay              | 0.34 (0.3-0.37)    | 15.41 (13.63-17.13) | 1.88 (1.46-2.4)     | 34.76 (27.05-44.15) | 3.48 (3.24 to 3.71)    |
| 6  |                       |                    |                     |                     |                     |                        |
| 7  |                       |                    |                     |                     |                     |                        |
| 8  | Peru                  | 2.92 (2.59-3.3)    | 24.09 (21.15-27.33) | 8.04 (5.92-10.44)   | 24.72 (18.22-32.03) | 0.19 (-0.04 to 0.42)   |
| 9  |                       |                    |                     |                     |                     |                        |
| 10 | Philippines           | 10.41 (9.42-11.48) | 38.22 (34.49-42.3)  | 33.36 (27.88-39.55) | 44.7 (37.65-52.35)  | 0.92 (0.66 to 1.18)    |
| 11 |                       |                    |                     |                     |                     |                        |
| 12 |                       |                    |                     |                     |                     |                        |
| 13 | Poland                | 4.41 (4.25-4.53)   | 10.66 (10.2-10.95)  | 4.7 (3.97-5.59)     | 6.5 (5.49-7.73)     | -1.96 (-2.39 to -1.53) |
| 14 |                       |                    |                     |                     |                     |                        |
| 15 | Portugal              | 1.58 (1.49-1.67)   | 12.57 (11.77-13.3)  | 4.07 (3.45-4.51)    | 13.48 (11.55-14.86) | 0.38 (-0.07 to 0.84)   |
| 16 |                       |                    |                     |                     |                     |                        |
| 17 |                       |                    |                     |                     |                     |                        |
| 18 | Puerto Rico           | 0.99 (0.93-1.05)   | 28.44 (26.47-30.11) | 2.06 (1.6-2.59)     | 26.89 (21.12-34.09) | 0.4 (0.08 to 0.72)     |
| 19 |                       |                    |                     |                     |                     |                        |
| 20 |                       |                    |                     |                     |                     |                        |
| 21 | Qatar                 | 0.03 (0.02-0.04)   | 48.93 (38.41-84.35) | 0.13 (0.1-0.17)     | 45.88 (37.09-55.98) | 0.07 (-0.19 to 0.33)   |
| 22 |                       |                    |                     |                     |                     |                        |
| 23 | Republic of Korea     | 3.12 (2.97-3.33)   | 12.08 (11.28-12.97) | 7.98 (6.93-8.86)    | 9.56 (8.27-10.64)   | -0.56 (-0.65 to -0.47) |
| 24 |                       |                    |                     |                     |                     |                        |
| 25 |                       |                    |                     |                     |                     |                        |
| 26 | Republic of Moldova   | 0.1 (0.09-0.11)    | 2.87 (2.67-3.05)    | 0.25 (0.21-0.28)    | 4.46 (3.88-5.03)    | 1.53 (1.2 to 1.85)     |
| 27 |                       |                    |                     |                     |                     |                        |
| 28 |                       |                    |                     |                     |                     |                        |
| 29 | Romania               | 2.59 (2.47-2.69)   | 10.43 (9.94-10.84)  | 3.04 (2.55-3.61)    | 7.98 (6.68-9.46)    | -0.52 (-1.04 to 0)     |
| 30 |                       |                    |                     |                     |                     |                        |
| 31 | Russian Federation    | 9.02 (8.79-9.32)   | 5.47 (5.29-5.63)    | 11.65 (10.16-13.13) | 5.17 (4.52-5.82)    | -0.89 (-1.21 to -0.57) |
| 32 |                       |                    |                     |                     |                     |                        |
| 33 |                       |                    |                     |                     |                     |                        |
| 34 | Rwanda                | 0.93 (0.76-1.1)    | 32.51 (27.17-38.51) | 1.27 (0.99-1.56)    | 24.68 (19.41-29.96) | -1.65 (-1.93 to -1.37) |
| 35 |                       |                    |                     |                     |                     |                        |
| 36 | Saint Kitts and Nevis | 0.02 (0.02-0.02)   | 48.81 (44.79-53.28) | 0.03 (0.03-0.04)    | 53.07 (44.4-61.71)  | 0.73 (0.55 to 0.91)    |
| 37 |                       |                    |                     |                     |                     |                        |
| 38 |                       |                    |                     |                     |                     |                        |
| 39 |                       |                    |                     |                     |                     |                        |
| 40 |                       |                    |                     |                     |                     |                        |
| 41 |                       |                    |                     |                     |                     |                        |
| 42 |                       |                    |                     |                     |                     |                        |
| 43 |                       |                    |                     |                     |                     |                        |
| 44 |                       |                    |                     |                     |                     |                        |
| 45 |                       |                    |                     |                     |                     |                        |
| 46 |                       |                    |                     |                     |                     |                        |

|    |                                  |                  |                     |                  |                     |                        |
|----|----------------------------------|------------------|---------------------|------------------|---------------------|------------------------|
| 1  |                                  |                  |                     |                  |                     |                        |
| 2  |                                  |                  |                     |                  |                     |                        |
| 3  |                                  |                  |                     |                  |                     |                        |
| 4  |                                  |                  |                     |                  |                     |                        |
| 5  | Saint Lucia                      | 0.03 (0.02-0.03) | 31.56 (29.14-33.94) | 0.07 (0.06-0.08) | 34.59 (28.97-40.83) | 0.39 (0.16 to 0.62)    |
| 6  |                                  |                  |                     |                  |                     |                        |
| 7  |                                  |                  |                     |                  |                     |                        |
| 8  | Saint Vincent and the Grenadines | 0.02 (0.02-0.02) | 25.51 (23.01-27.92) | 0.05 (0.04-0.05) | 36.54 (31.68-42.06) | 1.55 (1.32 to 1.78)    |
| 9  |                                  |                  |                     |                  |                     |                        |
| 10 | Samoa                            | 0.03 (0.02-0.04) | 37.95 (30.01-47.78) | 0.06 (0.05-0.08) | 44.6 (36.37-54.81)  | 0.47 (0.26 to 0.68)    |
| 11 |                                  |                  |                     |                  |                     |                        |
| 12 |                                  |                  |                     |                  |                     |                        |
| 13 | San Marino                       | 0 (0-0)          | 4.05 (3.41-4.74)    | 0 (0-0.01)       | 5.09 (3.52-6.82)    | 1.51 (1.24 to 1.77)    |
| 14 |                                  |                  |                     |                  |                     |                        |
| 15 | Sao Tome and Principe            | 0.03 (0.02-0.03) | 43.51 (36.27-49.57) | 0.05 (0.04-0.06) | 51.3 (40.4-59.87)   | 0.48 (0.36 to 0.6)     |
| 16 |                                  |                  |                     |                  |                     |                        |
| 17 |                                  |                  |                     |                  |                     |                        |
| 18 | Saudi Arabia                     | 2.48 (1.93-3.1)  | 47.9 (37.69-59.35)  | 6.93 (5.45-8.55) | 52.88 (42.82-63.11) | 0.58 (0.35 to 0.81)    |
| 19 |                                  |                  |                     |                  |                     |                        |
| 20 |                                  |                  |                     |                  |                     |                        |
| 21 | Senegal                          | 1.33 (1.04-1.71) | 41.68 (33.28-53.19) | 2.45 (1.89-3.22) | 34.93 (27.7-45.06)  | -0.54 (-0.67 to -0.42) |
| 22 |                                  |                  |                     |                  |                     |                        |
| 23 | Serbia                           | 1.42 (1.28-1.67) | 14 (12.58-16.3)     | 2.52 (2.05-3)    | 16.34 (13.34-19.38) | 0.83 (0.66 to 1)       |
| 24 |                                  |                  |                     |                  |                     |                        |
| 25 |                                  |                  |                     |                  |                     |                        |
| 26 | Seychelles                       | 0.02 (0.01-0.02) | 29.87 (26.45-33.1)  | 0.04 (0.04-0.05) | 44.43 (38.76-49.83) | 0.9 (0.52 to 1.29)     |
| 27 |                                  |                  |                     |                  |                     |                        |
| 28 | Sierra Leone                     | 0.64 (0.51-0.79) | 32.65 (26.08-39.62) | 1.04 (0.79-1.33) | 28.55 (22.85-35.84) | -0.28 (-0.36 to -0.2)  |
| 29 |                                  |                  |                     |                  |                     |                        |
| 30 |                                  |                  |                     |                  |                     |                        |
| 31 | Singapore                        | 0.31 (0.29-0.33) | 15.54 (14.57-16.4)  | 0.76 (0.66-0.83) | 10.51 (9.09-11.55)  | -0.38 (-0.94 to 0.18)  |
| 32 |                                  |                  |                     |                  |                     |                        |
| 33 |                                  |                  |                     |                  |                     |                        |
| 34 | Slovakia                         | 0.69 (0.64-0.74) | 11.86 (11.06-12.74) | 0.76 (0.6-0.93)  | 8.42 (6.73-10.33)   | -1.05 (-1.13 to -0.96) |
| 35 |                                  |                  |                     |                  |                     |                        |
| 36 | Slovenia                         | 0.15 (0.12-0.19) | 6.5 (5.14-8.02)     | 0.26 (0.2-0.33)  | 4.99 (3.91-6.36)    | -0.16 (-0.44 to 0.13)  |
| 37 |                                  |                  |                     |                  |                     |                        |
| 38 |                                  |                  |                     |                  |                     |                        |
| 39 |                                  |                  |                     |                  |                     |                        |
| 40 |                                  |                  |                     |                  |                     |                        |
| 41 |                                  |                  |                     |                  |                     |                        |
| 42 |                                  |                  |                     |                  |                     |                        |
| 43 |                                  |                  |                     |                  |                     |                        |
| 44 |                                  |                  |                     |                  |                     |                        |
| 45 |                                  |                  |                     |                  |                     |                        |
| 46 |                                  |                  |                     |                  |                     |                        |

|    |                            |                  |                     |                     |                     |                        |
|----|----------------------------|------------------|---------------------|---------------------|---------------------|------------------------|
| 1  |                            |                  |                     |                     |                     |                        |
| 2  |                            |                  |                     |                     |                     |                        |
| 3  |                            |                  |                     |                     |                     |                        |
| 4  |                            |                  |                     |                     |                     |                        |
| 5  | Solomon Islands            | 0.07 (0.05-0.09) | 41.92 (31.97-57.06) | 0.09 (0.07-0.11)    | 25.15 (20.72-29.99) | -1.94 (-2.35 to -1.53) |
| 6  |                            |                  |                     |                     |                     |                        |
| 7  |                            |                  |                     |                     |                     |                        |
| 8  | Somalia                    | 0.76 (0.57-0.96) | 31.28 (23.57-39.61) | 1.88 (1.43-2.5)     | 29.63 (22.61-39.38) | -0.06 (-0.11 to -0.01) |
| 9  |                            |                  |                     |                     |                     |                        |
| 10 | South Africa               | 4.61 (4.25-5.07) | 22 (20.07-24.29)    | 12.35 (11.41-13.22) | 31.02 (28.44-33.22) | 1.29 (0.9 to 1.68)     |
| 11 |                            |                  |                     |                     |                     |                        |
| 12 |                            |                  |                     |                     |                     |                        |
| 13 | South Sudan                | 0.65 (0.48-0.83) | 27.62 (20.27-35.67) | 0.93 (0.69-1.25)    | 27.22 (20.38-35.97) | -0.06 (-0.09 to -0.02) |
| 14 |                            |                  |                     |                     |                     |                        |
| 15 |                            |                  |                     |                     |                     |                        |
| 16 | Spain                      | 7.68 (6.91-8.29) | 14.79 (13.28-15.99) | 14.65 (12.08-16.74) | 11.06 (9.33-12.49)  | -0.87 (-0.94 to -0.8)  |
| 17 |                            |                  |                     |                     |                     |                        |
| 18 | Sri Lanka                  | 2.49 (2.21-2.74) | 25.27 (22.31-27.99) | 5.56 (4.15-7.26)    | 24.09 (18.08-31.21) | -0.11 (-0.51 to 0.28)  |
| 19 |                            |                  |                     |                     |                     |                        |
| 20 |                            |                  |                     |                     |                     |                        |
| 21 | Sudan                      | 2.61 (2.06-3.46) | 28.53 (22.13-40.32) | 4.75 (3.37-7.17)    | 28.39 (20.33-44.3)  | 0.05 (-0.04 to 0.14)   |
| 22 |                            |                  |                     |                     |                     |                        |
| 23 | Suriname                   | 0.07 (0.07-0.08) | 28.55 (25.56-30.97) | 0.26 (0.22-0.31)    | 45.34 (37.97-53.46) | 1.67 (1.38 to 1.96)    |
| 24 |                            |                  |                     |                     |                     |                        |
| 25 |                            |                  |                     |                     |                     |                        |
| 26 | Sweden                     | 0.65 (0.59-0.69) | 3.93 (3.59-4.17)    | 2 (1.68-2.21)       | 7.5 (6.43-8.23)     | 2.55 (2.42 to 2.67)    |
| 27 |                            |                  |                     |                     |                     |                        |
| 28 |                            |                  |                     |                     |                     |                        |
| 29 | Switzerland                | 0.61 (0.54-0.66) | 5.43 (4.84-5.87)    | 2.22 (1.82-2.52)    | 9.49 (7.91-10.75)   | 2.76 (2.5 to 3.03)     |
| 30 |                            |                  |                     |                     |                     |                        |
| 31 | Syrian Arab Republic       | 1.95 (1.61-2.37) | 36.99 (30.44-46.13) | 2.66 (2.07-3.42)    | 27.78 (22.07-34.58) | -1.65 (-1.95 to -1.34) |
| 32 |                            |                  |                     |                     |                     |                        |
| 33 |                            |                  |                     |                     |                     |                        |
| 34 | Taiwan (Province of China) | 3.33 (3.14-3.53) | 26.1 (24.33-27.84)  | 8.25 (6.51-10.33)   | 20.47 (16.14-25.73) | -0.94 (-1.1 to -0.79)  |
| 35 |                            |                  |                     |                     |                     |                        |
| 36 | Tajikistan                 | 0.1 (0.1-0.11)   | 3.18 (2.94-3.47)    | 0.4 (0.33-0.49)     | 9.4 (7.8-11.25)     | 4.07 (3.7 to 4.45)     |
| 37 |                            |                  |                     |                     |                     |                        |
| 38 |                            |                  |                     |                     |                     |                        |
| 39 |                            |                  |                     |                     |                     |                        |
| 40 |                            |                  |                     |                     |                     |                        |
| 41 |                            |                  |                     |                     |                     |                        |
| 42 |                            |                  |                     |                     |                     |                        |
| 43 |                            |                  |                     |                     |                     |                        |
| 44 |                            |                  |                     |                     |                     |                        |
| 45 |                            |                  |                     |                     |                     |                        |
| 46 |                            |                  |                     |                     |                     |                        |



1  
2  
3  
4  
5  
6  
7  
8  
9  
10  
11  
12  
13  
14  
15  
16  
17  
18  
19  
20  
21  
22  
23  
24  
25  
26  
27  
28  
29  
30  
31  
32  
33  
34  
35  
36  
37  
38  
39  
40  
41  
42  
43  
44  
45  
46

|                      |                    |                     |                     |                     |                        |
|----------------------|--------------------|---------------------|---------------------|---------------------|------------------------|
| Thailand             | 9.77 (8.63-11.15)  | 29.2 (25.83-33.3)   | 27.45 (21.01-35.47) | 27.94 (21.36-35.99) | -0.38 (-0.48 to -0.28) |
| Timor-Leste          | 0.09 (0.07-0.12)   | 31.54 (24.73-42.46) | 0.23 (0.17-0.3)     | 31.3 (24.09-39.75)  | -0.04 (-0.24 to 0.15)  |
| Togo                 | 0.43 (0.35-0.54)   | 34.23 (28.17-42.73) | 1 (0.79-1.27)       | 30.2 (24.51-37.23)  | -0.43 (-0.47 to -0.39) |
| Tokelau              | 0 (0-0)            | 32.9 (25.7-42.75)   | 0 (0-0)             | 40.42 (31.37-54.02) | 0.67 (0.44 to 0.9)     |
| Tonga                | 0.01 (0.01-0.02)   | 28.56 (23.31-37.54) | 0.03 (0.03-0.04)    | 41.51 (33.11-54.56) | 1.25 (0.87 to 1.63)    |
| Trinidad and Tobago  | 0.18 (0.16-0.19)   | 21.8 (20.39-23.17)  | 0.62 (0.46-0.8)     | 34.37 (25.88-44.38) | 2 (1.76 to 2.25)       |
| Tunisia              | 1.03 (0.88-1.23)   | 24.28 (20.58-29.37) | 2.63 (1.88-3.49)    | 23.62 (16.87-31.07) | -0.12 (-0.16 to -0.09) |
| Turkey               | 11.61 (9.54-15.85) | 35.19 (28.26-50.25) | 19.19 (15.49-23.48) | 23.48 (18.99-28.71) | -1.28 (-1.59 to -0.97) |
| Turkmenistan         | 0.31 (0.29-0.33)   | 13.45 (12.55-14.37) | 0.71 (0.58-0.9)     | 17.38 (14.16-21.64) | 0.34 (0.03 to 0.65)    |
| Tuvalu               | 0 (0-0)            | 38.58 (30.62-49.14) | 0 (0-0.01)          | 48.67 (35.96-66.59) | 0.78 (0.56 to 0.99)    |
| Uganda               | 1.55 (1.2-1.94)    | 25.22 (19.55-31.82) | 3.39 (2.62-4.26)    | 25.81 (20.58-31.71) | -0.19 (-0.32 to -0.05) |
| Ukraine              | 1.41 (1.34-1.47)   | 2.29 (2.15-2.39)    | 2.66 (2.28-3.07)    | 3.86 (3.31-4.47)    | 2.18 (1.89 to 2.47)    |
| United Arab Emirates | 0.21 (0.16-0.26)   | 61.23 (37.47-75.7)  | 1.43 (0.91-2.26)    | 48.09 (29.07-73.62) | -0.82 (-1.4 to -0.24)  |

|    |                                    |                    |                     |                       |                     |                        |
|----|------------------------------------|--------------------|---------------------|-----------------------|---------------------|------------------------|
| 1  |                                    |                    |                     |                       |                     |                        |
| 2  |                                    |                    |                     |                       |                     |                        |
| 3  |                                    |                    |                     |                       |                     |                        |
| 4  |                                    |                    |                     |                       |                     |                        |
| 5  | United Kingdom                     | 4.97 (4.64-5.15)   | 5.41 (5.03-5.63)    | 7.78 (6.85-8.33)      | 5.29 (4.7-5.64)     | 0.38 (0.12 to 0.64)    |
| 6  |                                    |                    |                     |                       |                     |                        |
| 7  |                                    |                    |                     |                       |                     |                        |
| 8  | United Republic of Tanzania        | 2.75 (2.31-3.27)   | 26.7 (22.58-32.2)   | 6.23 (5.26-7.36)      | 27.3 (23.17-31.68)  | 0.13 (0.05 to 0.2)     |
| 9  |                                    |                    |                     |                       |                     |                        |
| 10 | United States of America           | 33.1 (30.49-34.45) | 9.94 (9.18-10.34)   | 106.95 (95.86-114.38) | 17.77 (16.12-18.91) | 2.43 (2.22 to 2.63)    |
| 11 |                                    |                    |                     |                       |                     |                        |
| 12 |                                    |                    |                     |                       |                     |                        |
| 13 | United States Virgin Islands       | 0.02 (0.01-0.02)   | 21.34 (18.16-24.86) | 0.05 (0.04-0.06)      | 30.18 (25.88-34.3)  | 1.76 (1.53 to 1.99)    |
| 14 |                                    |                    |                     |                       |                     |                        |
| 15 | Uruguay                            | 0.51 (0.47-0.54)   | 13.21 (12.24-14.02) | 0.99 (0.87-1.09)      | 15.9 (14.15-17.4)   | 0.94 (0.8 to 1.09)     |
| 16 |                                    |                    |                     |                       |                     |                        |
| 17 |                                    |                    |                     |                       |                     |                        |
| 18 | Uzbekistan                         | 1.89 (1.64-2.52)   | 14.76 (12.61-20.49) | 3.97 (3.33-4.67)      | 19.85 (17.05-22.89) | 0.69 (-0.1 to 1.5)     |
| 19 |                                    |                    |                     |                       |                     |                        |
| 20 | Vanuatu                            | 0.02 (0.01-0.02)   | 26.09 (18.67-35.84) | 0.07 (0.05-0.09)      | 43.38 (32.55-57.97) | 1.91 (1.78 to 2.04)    |
| 21 |                                    |                    |                     |                       |                     |                        |
| 22 |                                    |                    |                     |                       |                     |                        |
| 23 | Venezuela (Bolivarian Republic of) | 1.55 (1.46-1.64)   | 16.19 (15.07-17.25) | 10.41 (7.89-13.43)    | 36.77 (27.88-47.38) | 2.43 (1.94 to 2.92)    |
| 24 |                                    |                    |                     |                       |                     |                        |
| 25 |                                    |                    |                     |                       |                     |                        |
| 26 | Viet Nam                           | 11.03 (8.95-13.56) | 29.05 (23.77-35.4)  | 21.48 (16.68-25.81)   | 26.62 (20.89-31.76) | -0.38 (-0.85 to 0.09)  |
| 27 |                                    |                    |                     |                       |                     |                        |
| 28 | Yemen                              | 1.15 (0.86-1.54)   | 24.8 (18.61-34.23)  | 2.68 (2.05-3.54)      | 23.19 (18.02-30.53) | -0.26 (-0.33 to -0.18) |
| 29 |                                    |                    |                     |                       |                     |                        |
| 30 |                                    |                    |                     |                       |                     |                        |
| 31 | Zambia                             | 0.95 (0.81-1.11)   | 32.83 (27.31-38.79) | 1.93 (1.55-2.4)       | 30.81 (25.1-37.46)  | -0.48 (-0.66 to -0.3)  |
| 32 |                                    |                    |                     |                       |                     |                        |
| 33 |                                    |                    |                     |                       |                     |                        |
| 34 | Zimbabwe                           | 0.92 (0.7-1.36)    | 25.95 (20.13-37.57) | 2.29 (1.66-3.38)      | 37.07 (27.36-55.38) | 1.55 (1.21 to 1.89)    |
| 35 |                                    |                    |                     |                       |                     |                        |
| 36 |                                    |                    |                     |                       |                     |                        |
| 37 |                                    |                    |                     |                       |                     |                        |
| 38 |                                    |                    |                     |                       |                     |                        |
| 39 |                                    |                    |                     |                       |                     |                        |
| 40 |                                    |                    |                     |                       |                     |                        |
| 41 |                                    |                    |                     |                       |                     |                        |
| 42 |                                    |                    |                     |                       |                     |                        |
| 43 |                                    |                    |                     |                       |                     |                        |
| 44 |                                    |                    |                     |                       |                     |                        |
| 45 |                                    |                    |                     |                       |                     |                        |
| 46 |                                    |                    |                     |                       |                     |                        |

**Supplemental table 5. Death cases ratio between females to males and age-standardized death rate (ASDR) ratio between females to males in 21 geographic regions from 1990 to 2019 in 21 regions.**

| location             | year | Ratio of female to male death cases | Ratio of female ASDR to male ASDR |
|----------------------|------|-------------------------------------|-----------------------------------|
| Andean Latin America | 1990 | 0.942869                            | 0.890741                          |
| Andean Latin America | 1991 | 0.989165                            | 0.932389                          |
| Andean Latin America | 1992 | 1.02563                             | 0.967065                          |
| Andean Latin America | 1993 | 1.016962                            | 0.958297                          |
| Andean Latin America | 1994 | 1.061313                            | 1.001181                          |
| Andean Latin America | 1995 | 1.077537                            | 1.019983                          |
| Andean Latin America | 1996 | 1.032404                            | 0.980159                          |
| Andean Latin America | 1997 | 1.030348                            | 0.978622                          |
| Andean Latin America | 1998 | 1.022574                            | 0.969425                          |
| Andean Latin America | 1999 | 0.992515                            | 0.940177                          |

|                      |      |          |          |
|----------------------|------|----------|----------|
| Andean Latin America | 2000 | 0.997206 | 0.943015 |
| Andean Latin America | 2001 | 0.947616 | 0.894712 |
| Andean Latin America | 2002 | 0.990555 | 0.931385 |
| Andean Latin America | 2003 | 1.019051 | 0.956351 |
| Andean Latin America | 2004 | 0.985019 | 0.922183 |
| Andean Latin America | 2005 | 0.978694 | 0.912562 |
| Andean Latin America | 2006 | 0.961884 | 0.892727 |
| Andean Latin America | 2007 | 0.945709 | 0.874394 |
| Andean Latin America | 2008 | 0.952065 | 0.876611 |
| Andean Latin America | 2009 | 0.97062  | 0.890118 |
| Andean Latin America | 2010 | 0.975539 | 0.890804 |
| Andean Latin America | 2011 | 0.970379 | 0.882799 |
| Andean Latin America | 2012 | 1.010809 | 0.91578  |

1  
2  
3  
4  
5  
6  
7  
8  
9  
10  
11  
12  
13  
14  
15  
16  
17  
18  
19  
20  
21  
22  
23  
24  
25  
26  
27  
28  
29  
30  
31  
32  
33  
34  
35  
36  
37  
38  
39  
40  
41  
42  
43  
44  
45  
46

|                      |      |          |          |
|----------------------|------|----------|----------|
| Andean Latin America | 2013 | 1.013769 | 0.915689 |
| Andean Latin America | 2014 | 1.008176 | 0.908392 |
| Andean Latin America | 2015 | 1.003827 | 0.902681 |
| Andean Latin America | 2016 | 1.013695 | 0.90961  |
| Andean Latin America | 2017 | 1.021095 | 0.915073 |
| Andean Latin America | 2018 | 1.028281 | 0.920944 |
| Andean Latin America | 2019 | 1.042441 | 0.933531 |
| Australasia          | 1990 | 1.256436 | 0.749952 |
| Australasia          | 1991 | 1.251345 | 0.749596 |
| Australasia          | 1992 | 1.221065 | 0.731598 |
| Australasia          | 1993 | 1.197424 | 0.715706 |
| Australasia          | 1994 | 1.184041 | 0.705074 |
| Australasia          | 1995 | 1.189314 | 0.708414 |

|             |      |          |          |
|-------------|------|----------|----------|
| Australasia | 1996 | 1.171815 | 0.699034 |
| Australasia | 1997 | 1.154972 | 0.694376 |
| Australasia | 1998 | 1.125176 | 0.679026 |
| Australasia | 1999 | 1.123    | 0.679313 |
| Australasia | 2000 | 1.107004 | 0.67342  |
| Australasia | 2001 | 1.092594 | 0.667626 |
| Australasia | 2002 | 1.09213  | 0.668502 |
| Australasia | 2003 | 1.073556 | 0.660159 |
| Australasia | 2004 | 1.093004 | 0.674235 |
| Australasia | 2005 | 1.109953 | 0.687767 |
| Australasia | 2006 | 1.11501  | 0.694533 |
| Australasia | 2007 | 1.119263 | 0.702944 |
| Australasia | 2008 | 1.12093  | 0.709291 |

|             |      |          |          |
|-------------|------|----------|----------|
| Australasia | 2009 | 1.12578  | 0.717931 |
| Australasia | 2010 | 1.119825 | 0.719347 |
| Australasia | 2011 | 1.110324 | 0.720219 |
| Australasia | 2012 | 1.102299 | 0.723081 |
| Australasia | 2013 | 1.092797 | 0.725804 |
| Australasia | 2014 | 1.087757 | 0.72868  |
| Australasia | 2015 | 1.082458 | 0.732461 |
| Australasia | 2016 | 1.075631 | 0.733734 |
| Australasia | 2017 | 1.056633 | 0.72804  |
| Australasia | 2018 | 1.040454 | 0.72481  |
| Australasia | 2019 | 1.025964 | 0.721186 |
| Caribbean   | 1990 | 0.778203 | 0.705687 |
| Caribbean   | 1991 | 0.789518 | 0.714482 |

|           |      |          |          |
|-----------|------|----------|----------|
| Caribbean | 1992 | 0.790374 | 0.71231  |
| Caribbean | 1993 | 0.795133 | 0.714068 |
| Caribbean | 1994 | 0.794694 | 0.711298 |
| Caribbean | 1995 | 0.795712 | 0.709507 |
| Caribbean | 1996 | 0.799616 | 0.710759 |
| Caribbean | 1997 | 0.797003 | 0.706666 |
| Caribbean | 1998 | 0.795225 | 0.702657 |
| Caribbean | 1999 | 0.806613 | 0.710478 |
| Caribbean | 2000 | 0.84186  | 0.739455 |
| Caribbean | 2001 | 0.85681  | 0.751266 |
| Caribbean | 2002 | 0.865068 | 0.757623 |
| Caribbean | 2003 | 0.877107 | 0.766409 |
| Caribbean | 2004 | 0.894996 | 0.780393 |



1  
2  
3  
4  
5  
6  
7  
8  
9  
10  
11  
12  
13  
14  
15  
16  
17  
18  
19  
20  
21  
22  
23  
24  
25  
26  
27  
28  
29  
30  
31  
32  
33  
34  
35  
36  
37  
38  
39  
40  
41  
42  
43  
44  
45  
46

|           |      |          |          |
|-----------|------|----------|----------|
| Caribbean | 2005 | 0.901407 | 0.785161 |
| Caribbean | 2006 | 0.90325  | 0.786336 |
| Caribbean | 2007 | 0.896328 | 0.779649 |
| Caribbean | 2008 | 0.888385 | 0.771347 |
| Caribbean | 2009 | 0.877739 | 0.760608 |
| Caribbean | 2010 | 0.902529 | 0.780843 |
| Caribbean | 2011 | 0.894764 | 0.774198 |
| Caribbean | 2012 | 0.897262 | 0.776873 |
| Caribbean | 2013 | 0.897109 | 0.776448 |
| Caribbean | 2014 | 0.895273 | 0.774364 |
| Caribbean | 2015 | 0.890096 | 0.769517 |
| Caribbean | 2016 | 0.888374 | 0.767038 |
| Caribbean | 2017 | 0.887092 | 0.764536 |

|              |      |          |          |
|--------------|------|----------|----------|
| Caribbean    | 2018 | 0.894349 | 0.768945 |
| Caribbean    | 2019 | 0.900884 | 0.773334 |
| Central Asia | 1990 | 0.993776 | 0.730286 |
| Central Asia | 1991 | 0.991773 | 0.731194 |
| Central Asia | 1992 | 0.989487 | 0.735739 |
| Central Asia | 1993 | 0.982871 | 0.732542 |
| Central Asia | 1994 | 0.967481 | 0.724436 |
| Central Asia | 1995 | 0.953222 | 0.716344 |
| Central Asia | 1996 | 0.932845 | 0.703873 |
| Central Asia | 1997 | 0.939018 | 0.708663 |
| Central Asia | 1998 | 0.942864 | 0.711008 |
| Central Asia | 1999 | 0.93285  | 0.706787 |
| Central Asia | 2000 | 0.914752 | 0.697569 |

|              |      |          |          |
|--------------|------|----------|----------|
| Central Asia | 2001 | 0.90155  | 0.688619 |
| Central Asia | 2002 | 0.889552 | 0.67599  |
| Central Asia | 2003 | 0.880783 | 0.667315 |
| Central Asia | 2004 | 0.876683 | 0.667546 |
| Central Asia | 2005 | 0.878457 | 0.676155 |
| Central Asia | 2006 | 0.867182 | 0.670221 |
| Central Asia | 2007 | 0.861093 | 0.665534 |
| Central Asia | 2008 | 0.858393 | 0.661361 |
| Central Asia | 2009 | 0.865353 | 0.664304 |
| Central Asia | 2010 | 0.870146 | 0.66312  |
| Central Asia | 2011 | 0.864532 | 0.659123 |
| Central Asia | 2012 | 0.866978 | 0.660768 |
| Central Asia | 2013 | 0.863849 | 0.658662 |

|                |      |          |          |
|----------------|------|----------|----------|
| Central Asia   | 2014 | 0.851903 | 0.644534 |
| Central Asia   | 2015 | 0.851577 | 0.639005 |
| Central Asia   | 2016 | 0.849903 | 0.637999 |
| Central Asia   | 2017 | 0.850543 | 0.637766 |
| Central Asia   | 2018 | 0.846082 | 0.636936 |
| Central Asia   | 2019 | 0.848602 | 0.64247  |
| Central Europe | 1990 | 0.955491 | 0.661719 |
| Central Europe | 1991 | 0.961364 | 0.663657 |
| Central Europe | 1992 | 0.957234 | 0.658579 |
| Central Europe | 1993 | 0.965166 | 0.660903 |
| Central Europe | 1994 | 0.966613 | 0.660389 |
| Central Europe | 1995 | 0.971466 | 0.661423 |
| Central Europe | 1996 | 0.979487 | 0.662808 |

1  
2  
3  
4  
5  
6  
7  
8  
9  
10  
11  
12  
13  
14  
15  
16  
17  
18  
19  
20  
21  
22  
23  
24  
25  
26  
27  
28  
29  
30  
31  
32  
33  
34  
35  
36  
37  
38  
39  
40  
41  
42  
43  
44  
45  
46

|                |      |          |          |
|----------------|------|----------|----------|
| Central Europe | 1997 | 0.989711 | 0.667123 |
| Central Europe | 1998 | 0.99268  | 0.662612 |
| Central Europe | 1999 | 1.007421 | 0.665519 |
| Central Europe | 2000 | 1.009404 | 0.66032  |
| Central Europe | 2001 | 1.001136 | 0.650922 |
| Central Europe | 2002 | 0.99002  | 0.639423 |
| Central Europe | 2003 | 0.985822 | 0.633371 |
| Central Europe | 2004 | 0.987337 | 0.630977 |
| Central Europe | 2005 | 0.996463 | 0.635996 |
| Central Europe | 2006 | 1.012738 | 0.645361 |
| Central Europe | 2007 | 1.033613 | 0.65755  |
| Central Europe | 2008 | 1.022364 | 0.649222 |
| Central Europe | 2009 | 1.028734 | 0.651344 |

|                       |      |          |          |
|-----------------------|------|----------|----------|
| Central Europe        | 2010 | 1.028359 | 0.649302 |
| Central Europe        | 2011 | 1.026432 | 0.646255 |
| Central Europe        | 2012 | 1.039093 | 0.651483 |
| Central Europe        | 2013 | 1.047601 | 0.653682 |
| Central Europe        | 2014 | 1.058371 | 0.659537 |
| Central Europe        | 2015 | 1.069497 | 0.665303 |
| Central Europe        | 2016 | 1.065577 | 0.663071 |
| Central Europe        | 2017 | 1.059955 | 0.660605 |
| Central Europe        | 2018 | 1.058167 | 0.660511 |
| Central Europe        | 2019 | 1.056385 | 0.660778 |
| Central Latin America | 1990 | 0.977794 | 0.906047 |
| Central Latin America | 1991 | 0.960958 | 0.88965  |
| Central Latin America | 1992 | 0.96836  | 0.891993 |

|                       |      |          |          |
|-----------------------|------|----------|----------|
| Central Latin America | 1993 | 0.96676  | 0.885486 |
| Central Latin America | 1994 | 0.960737 | 0.875372 |
| Central Latin America | 1995 | 0.974102 | 0.885237 |
| Central Latin America | 1996 | 0.980331 | 0.887809 |
| Central Latin America | 1997 | 0.986228 | 0.890212 |
| Central Latin America | 1998 | 0.984161 | 0.884764 |
| Central Latin America | 1999 | 0.993865 | 0.890436 |
| Central Latin America | 2000 | 0.974373 | 0.871688 |
| Central Latin America | 2001 | 0.977773 | 0.871958 |
| Central Latin America | 2002 | 0.955348 | 0.848128 |
| Central Latin America | 2003 | 0.953418 | 0.84444  |
| Central Latin America | 2004 | 0.949965 | 0.839949 |
| Central Latin America | 2005 | 0.94173  | 0.832021 |

|                       |      |          |          |
|-----------------------|------|----------|----------|
| Central Latin America | 2006 | 0.929669 | 0.819435 |
| Central Latin America | 2007 | 0.928761 | 0.817536 |
| Central Latin America | 2008 | 0.913732 | 0.801903 |
| Central Latin America | 2009 | 0.918766 | 0.802136 |
| Central Latin America | 2010 | 0.932299 | 0.811422 |
| Central Latin America | 2011 | 0.923423 | 0.801163 |
| Central Latin America | 2012 | 0.916951 | 0.792063 |
| Central Latin America | 2013 | 0.906908 | 0.780367 |
| Central Latin America | 2014 | 0.915868 | 0.78579  |
| Central Latin America | 2015 | 0.904761 | 0.774169 |
| Central Latin America | 2016 | 0.894395 | 0.763281 |
| Central Latin America | 2017 | 0.878355 | 0.747275 |
| Central Latin America | 2018 | 0.879571 | 0.745725 |



1  
2  
3  
4  
5  
6  
7  
8  
9  
10  
11  
12  
13  
14  
15  
16  
17  
18  
19  
20  
21  
22  
23  
24  
25  
26  
27  
28  
29  
30  
31  
32  
33  
34  
35  
36  
37  
38  
39  
40  
41  
42  
43  
44  
45  
46

|                            |      |          |          |
|----------------------------|------|----------|----------|
| Central Latin America      | 2019 | 0.873385 | 0.737332 |
| Central Sub-Saharan Africa | 1990 | 0.683461 | 0.582902 |
| Central Sub-Saharan Africa | 1991 | 0.694933 | 0.587758 |
| Central Sub-Saharan Africa | 1992 | 0.702424 | 0.589793 |
| Central Sub-Saharan Africa | 1993 | 0.714943 | 0.595657 |
| Central Sub-Saharan Africa | 1994 | 0.724653 | 0.59941  |
| Central Sub-Saharan Africa | 1995 | 0.732751 | 0.601448 |
| Central Sub-Saharan Africa | 1996 | 0.756166 | 0.614733 |
| Central Sub-Saharan Africa | 1997 | 0.757363 | 0.61014  |
| Central Sub-Saharan Africa | 1998 | 0.770799 | 0.615205 |
| Central Sub-Saharan Africa | 1999 | 0.783386 | 0.61934  |
| Central Sub-Saharan Africa | 2000 | 0.797995 | 0.624623 |
| Central Sub-Saharan Africa | 2001 | 0.813766 | 0.632481 |

|                            |      |          |          |
|----------------------------|------|----------|----------|
| Central Sub-Saharan Africa | 2002 | 0.833085 | 0.642304 |
| Central Sub-Saharan Africa | 2003 | 0.848224 | 0.65191  |
| Central Sub-Saharan Africa | 2004 | 0.857761 | 0.656619 |
| Central Sub-Saharan Africa | 2005 | 0.863588 | 0.659505 |
| Central Sub-Saharan Africa | 2006 | 0.861856 | 0.658283 |
| Central Sub-Saharan Africa | 2007 | 0.855563 | 0.655166 |
| Central Sub-Saharan Africa | 2008 | 0.851145 | 0.653598 |
| Central Sub-Saharan Africa | 2009 | 0.845802 | 0.651726 |
| Central Sub-Saharan Africa | 2010 | 0.838533 | 0.647863 |
| Central Sub-Saharan Africa | 2011 | 0.83013  | 0.644303 |
| Central Sub-Saharan Africa | 2012 | 0.823208 | 0.641886 |
| Central Sub-Saharan Africa | 2013 | 0.81738  | 0.640355 |
| Central Sub-Saharan Africa | 2014 | 0.813554 | 0.640249 |

1  
2  
3  
4  
5  
6  
7  
8  
9  
10  
11  
12  
13  
14  
15  
16  
17  
18  
19  
20  
21  
22  
23  
24  
25  
26  
27  
28  
29  
30  
31  
32  
33  
34  
35  
36  
37  
38  
39  
40  
41  
42  
43  
44  
45  
46

|                            |      |          |          |
|----------------------------|------|----------|----------|
| Central Sub-Saharan Africa | 2015 | 0.81476  | 0.642448 |
| Central Sub-Saharan Africa | 2016 | 0.815014 | 0.646596 |
| Central Sub-Saharan Africa | 2017 | 0.815435 | 0.651542 |
| Central Sub-Saharan Africa | 2018 | 0.813046 | 0.653874 |
| Central Sub-Saharan Africa | 2019 | 0.812155 | 0.657802 |
| East Asia                  | 1990 | 0.978254 | 0.818335 |
| East Asia                  | 1991 | 0.969935 | 0.811948 |
| East Asia                  | 1992 | 0.969225 | 0.811294 |
| East Asia                  | 1993 | 0.975501 | 0.816535 |
| East Asia                  | 1994 | 0.983547 | 0.817634 |
| East Asia                  | 1995 | 0.970594 | 0.806198 |
| East Asia                  | 1996 | 0.968826 | 0.803903 |
| East Asia                  | 1997 | 0.972998 | 0.805497 |

|           |      |          |          |
|-----------|------|----------|----------|
| East Asia | 1998 | 0.970348 | 0.796676 |
| East Asia | 1999 | 0.973644 | 0.800535 |
| East Asia | 2000 | 0.973907 | 0.806971 |
| East Asia | 2001 | 0.961738 | 0.796409 |
| East Asia | 2002 | 0.943917 | 0.783934 |
| East Asia | 2003 | 0.933697 | 0.779517 |
| East Asia | 2004 | 0.918842 | 0.76399  |
| East Asia | 2005 | 0.899777 | 0.742355 |
| East Asia | 2006 | 0.909001 | 0.745431 |
| East Asia | 2007 | 0.904869 | 0.737149 |
| East Asia | 2008 | 0.898908 | 0.729162 |
| East Asia | 2009 | 0.893633 | 0.720614 |
| East Asia | 2010 | 0.891647 | 0.714709 |

1  
2  
3  
4  
5  
6  
7  
8  
9  
10  
11  
12  
13  
14  
15  
16  
17  
18  
19  
20  
21  
22  
23  
24  
25  
26  
27  
28  
29  
30  
31  
32  
33  
34  
35  
36  
37  
38  
39  
40  
41  
42  
43  
44  
45  
46

|                |      |          |          |
|----------------|------|----------|----------|
| East Asia      | 2011 | 0.88997  | 0.706791 |
| East Asia      | 2012 | 0.868837 | 0.683317 |
| East Asia      | 2013 | 0.864019 | 0.674571 |
| East Asia      | 2014 | 0.860397 | 0.670162 |
| East Asia      | 2015 | 0.851087 | 0.659093 |
| East Asia      | 2016 | 0.854883 | 0.658215 |
| East Asia      | 2017 | 0.873032 | 0.671291 |
| East Asia      | 2018 | 0.892832 | 0.68718  |
| East Asia      | 2019 | 0.901698 | 0.691723 |
| Eastern Europe | 1990 | 1.23365  | 0.659579 |
| Eastern Europe | 1991 | 1.234032 | 0.661635 |
| Eastern Europe | 1992 | 1.179967 | 0.645697 |
| Eastern Europe | 1993 | 1.111938 | 0.629129 |

|                |      |          |          |
|----------------|------|----------|----------|
| Eastern Europe | 1994 | 1.083014 | 0.624362 |
| Eastern Europe | 1995 | 1.097775 | 0.626929 |
| Eastern Europe | 1996 | 1.136801 | 0.636876 |
| Eastern Europe | 1997 | 1.189719 | 0.652769 |
| Eastern Europe | 1998 | 1.200466 | 0.655556 |
| Eastern Europe | 1999 | 1.165156 | 0.646959 |
| Eastern Europe | 2000 | 1.133588 | 0.634773 |
| Eastern Europe | 2001 | 1.144775 | 0.639602 |
| Eastern Europe | 2002 | 1.145428 | 0.641292 |
| Eastern Europe | 2003 | 1.148307 | 0.645278 |
| Eastern Europe | 2004 | 1.147171 | 0.643072 |
| Eastern Europe | 2005 | 1.129964 | 0.635679 |
| Eastern Europe | 2006 | 1.160568 | 0.640647 |

1  
2  
3  
4  
5  
6  
7  
8  
9  
10  
11  
12  
13  
14  
15  
16  
17  
18  
19  
20  
21  
22  
23  
24  
25  
26  
27  
28  
29  
30  
31  
32  
33  
34  
35  
36  
37  
38  
39  
40  
41  
42  
43  
44  
45  
46

|                |      |          |          |
|----------------|------|----------|----------|
| Eastern Europe | 2007 | 1.178074 | 0.645161 |
| Eastern Europe | 2008 | 1.173178 | 0.640809 |
| Eastern Europe | 2009 | 1.213267 | 0.652961 |
| Eastern Europe | 2010 | 1.216113 | 0.651057 |
| Eastern Europe | 2011 | 1.24856  | 0.661311 |
| Eastern Europe | 2012 | 1.26107  | 0.663132 |
| Eastern Europe | 2013 | 1.276739 | 0.668352 |
| Eastern Europe | 2014 | 1.282237 | 0.669976 |
| Eastern Europe | 2015 | 1.273576 | 0.668279 |
| Eastern Europe | 2016 | 1.293772 | 0.676652 |
| Eastern Europe | 2017 | 1.330071 | 0.693054 |
| Eastern Europe | 2018 | 1.325354 | 0.691408 |
| Eastern Europe | 2019 | 1.316541 | 0.688636 |

|                            |      |          |          |
|----------------------------|------|----------|----------|
| Eastern Sub-Saharan Africa | 1990 | 0.723735 | 0.659766 |
| Eastern Sub-Saharan Africa | 1991 | 0.716556 | 0.652735 |
| Eastern Sub-Saharan Africa | 1992 | 0.71224  | 0.648871 |
| Eastern Sub-Saharan Africa | 1993 | 0.705678 | 0.643593 |
| Eastern Sub-Saharan Africa | 1994 | 0.702762 | 0.640668 |
| Eastern Sub-Saharan Africa | 1995 | 0.698844 | 0.636628 |
| Eastern Sub-Saharan Africa | 1996 | 0.697362 | 0.635147 |
| Eastern Sub-Saharan Africa | 1997 | 0.698754 | 0.636152 |
| Eastern Sub-Saharan Africa | 1998 | 0.702868 | 0.639227 |
| Eastern Sub-Saharan Africa | 1999 | 0.705082 | 0.639977 |
| Eastern Sub-Saharan Africa | 2000 | 0.700715 | 0.635388 |
| Eastern Sub-Saharan Africa | 2001 | 0.699235 | 0.632593 |
| Eastern Sub-Saharan Africa | 2002 | 0.700728 | 0.632842 |



|                            |      |          |          |
|----------------------------|------|----------|----------|
| Eastern Sub-Saharan Africa | 2003 | 0.702876 | 0.634288 |
| Eastern Sub-Saharan Africa | 2004 | 0.704983 | 0.635906 |
| Eastern Sub-Saharan Africa | 2005 | 0.708518 | 0.638477 |
| Eastern Sub-Saharan Africa | 2006 | 0.707323 | 0.63662  |
| Eastern Sub-Saharan Africa | 2007 | 0.705661 | 0.634556 |
| Eastern Sub-Saharan Africa | 2008 | 0.703491 | 0.632789 |
| Eastern Sub-Saharan Africa | 2009 | 0.706474 | 0.635204 |
| Eastern Sub-Saharan Africa | 2010 | 0.711105 | 0.639797 |
| Eastern Sub-Saharan Africa | 2011 | 0.718351 | 0.646421 |
| Eastern Sub-Saharan Africa | 2012 | 0.723635 | 0.651391 |
| Eastern Sub-Saharan Africa | 2013 | 0.730521 | 0.657747 |
| Eastern Sub-Saharan Africa | 2014 | 0.735582 | 0.663012 |
| Eastern Sub-Saharan Africa | 2015 | 0.741687 | 0.668864 |

|                            |      |          |          |
|----------------------------|------|----------|----------|
| Eastern Sub-Saharan Africa | 2016 | 0.745789 | 0.673767 |
| Eastern Sub-Saharan Africa | 2017 | 0.752803 | 0.681804 |
| Eastern Sub-Saharan Africa | 2018 | 0.757852 | 0.687995 |
| Eastern Sub-Saharan Africa | 2019 | 0.762287 | 0.693751 |
| High-income Asia Pacific   | 1990 | 1.039751 | 0.667137 |
| High-income Asia Pacific   | 1991 | 1.043418 | 0.661266 |
| High-income Asia Pacific   | 1992 | 1.054406 | 0.660081 |
| High-income Asia Pacific   | 1993 | 1.065479 | 0.660206 |
| High-income Asia Pacific   | 1994 | 1.074912 | 0.660328 |
| High-income Asia Pacific   | 1995 | 1.08229  | 0.66066  |
| High-income Asia Pacific   | 1996 | 1.099512 | 0.667777 |
| High-income Asia Pacific   | 1997 | 1.103374 | 0.665346 |
| High-income Asia Pacific   | 1998 | 1.090814 | 0.652463 |

1  
2  
3  
4  
5  
6  
7  
8  
9  
10  
11  
12  
13  
14  
15  
16  
17  
18  
19  
20  
21  
22  
23  
24  
25  
26  
27  
28  
29  
30  
31  
32  
33  
34  
35  
36  
37  
38  
39  
40  
41  
42  
43  
44  
45  
46

|                          |      |          |          |
|--------------------------|------|----------|----------|
| High-income Asia Pacific | 1999 | 1.080631 | 0.640419 |
| High-income Asia Pacific | 2000 | 1.077246 | 0.633324 |
| High-income Asia Pacific | 2001 | 1.078976 | 0.628989 |
| High-income Asia Pacific | 2002 | 1.083506 | 0.625751 |
| High-income Asia Pacific | 2003 | 1.079641 | 0.618161 |
| High-income Asia Pacific | 2004 | 1.086294 | 0.616881 |
| High-income Asia Pacific | 2005 | 1.078453 | 0.606349 |
| High-income Asia Pacific | 2006 | 1.085594 | 0.604766 |
| High-income Asia Pacific | 2007 | 1.076784 | 0.596348 |
| High-income Asia Pacific | 2008 | 1.064816 | 0.586519 |
| High-income Asia Pacific | 2009 | 1.046166 | 0.57464  |
| High-income Asia Pacific | 2010 | 1.038285 | 0.567576 |
| High-income Asia Pacific | 2011 | 1.055017 | 0.574227 |

|                           |      |          |          |
|---------------------------|------|----------|----------|
| High-income Asia Pacific  | 2012 | 1.065024 | 0.578891 |
| High-income Asia Pacific  | 2013 | 1.07446  | 0.584658 |
| High-income Asia Pacific  | 2014 | 1.080257 | 0.589475 |
| High-income Asia Pacific  | 2015 | 1.084531 | 0.590498 |
| High-income Asia Pacific  | 2016 | 1.093062 | 0.595518 |
| High-income Asia Pacific  | 2017 | 1.092684 | 0.597114 |
| High-income Asia Pacific  | 2018 | 1.106932 | 0.607797 |
| High-income Asia Pacific  | 2019 | 1.109359 | 0.612461 |
| High-income North America | 1990 | 1.118132 | 0.672668 |
| High-income North America | 1991 | 1.117006 | 0.672201 |
| High-income North America | 1992 | 1.115077 | 0.671045 |
| High-income North America | 1993 | 1.113464 | 0.670112 |
| High-income North America | 1994 | 1.122594 | 0.675419 |

1  
2  
3  
4  
5  
6  
7  
8  
9  
10  
11  
12  
13  
14  
15  
16  
17  
18  
19  
20  
21  
22  
23  
24  
25  
26  
27  
28  
29  
30  
31  
32  
33  
34  
35  
36  
37  
38  
39  
40  
41  
42  
43  
44  
45  
46

|                           |      |          |          |
|---------------------------|------|----------|----------|
| High-income North America | 1995 | 1.124872 | 0.677823 |
| High-income North America | 1996 | 1.141051 | 0.688329 |
| High-income North America | 1997 | 1.152169 | 0.697537 |
| High-income North America | 1998 | 1.158742 | 0.704401 |
| High-income North America | 1999 | 1.166107 | 0.713378 |
| High-income North America | 2000 | 1.177151 | 0.724467 |
| High-income North America | 2001 | 1.177024 | 0.729607 |
| High-income North America | 2002 | 1.16057  | 0.723799 |
| High-income North America | 2003 | 1.151264 | 0.723251 |
| High-income North America | 2004 | 1.157041 | 0.731177 |
| High-income North America | 2005 | 1.157996 | 0.736166 |
| High-income North America | 2006 | 1.168287 | 0.747508 |
| High-income North America | 2007 | 1.174861 | 0.756554 |

|                              |      |          |          |
|------------------------------|------|----------|----------|
| High-income North America    | 2008 | 1.157709 | 0.751119 |
| High-income North America    | 2009 | 1.138461 | 0.745004 |
| High-income North America    | 2010 | 1.115781 | 0.735584 |
| High-income North America    | 2011 | 1.103844 | 0.734535 |
| High-income North America    | 2012 | 1.083181 | 0.727639 |
| High-income North America    | 2013 | 1.057522 | 0.717919 |
| High-income North America    | 2014 | 1.05067  | 0.720224 |
| High-income North America    | 2015 | 1.041592 | 0.720859 |
| High-income North America    | 2016 | 1.023499 | 0.715467 |
| High-income North America    | 2017 | 1.003664 | 0.707465 |
| High-income North America    | 2018 | 0.977158 | 0.692149 |
| High-income North America    | 2019 | 0.996235 | 0.70587  |
| North Africa and Middle East | 1990 | 0.992053 | 0.929902 |

|                              |      |          |          |
|------------------------------|------|----------|----------|
| North Africa and Middle East | 1991 | 0.999587 | 0.945749 |
| North Africa and Middle East | 1992 | 0.9933   | 0.945798 |
| North Africa and Middle East | 1993 | 0.991348 | 0.94837  |
| North Africa and Middle East | 1994 | 0.994314 | 0.95637  |
| North Africa and Middle East | 1995 | 0.992249 | 0.956899 |
| North Africa and Middle East | 1996 | 0.997432 | 0.963296 |
| North Africa and Middle East | 1997 | 0.988848 | 0.952588 |
| North Africa and Middle East | 1998 | 0.984311 | 0.946822 |
| North Africa and Middle East | 1999 | 0.989991 | 0.956975 |
| North Africa and Middle East | 2000 | 0.99719  | 0.973325 |
| North Africa and Middle East | 2001 | 0.988859 | 0.958619 |
| North Africa and Middle East | 2002 | 0.972092 | 0.932539 |
| North Africa and Middle East | 2003 | 0.965162 | 0.921957 |

|                              |      |          |          |
|------------------------------|------|----------|----------|
| North Africa and Middle East | 2004 | 0.972897 | 0.926071 |
| North Africa and Middle East | 2005 | 0.989718 | 0.947247 |
| North Africa and Middle East | 2006 | 1.004557 | 0.974732 |
| North Africa and Middle East | 2007 | 1.01095  | 0.99362  |
| North Africa and Middle East | 2008 | 1.017714 | 1.012304 |
| North Africa and Middle East | 2009 | 1.015727 | 1.017749 |
| North Africa and Middle East | 2010 | 1.014014 | 1.01966  |
| North Africa and Middle East | 2011 | 1.001629 | 1.011346 |
| North Africa and Middle East | 2012 | 1.002972 | 1.013633 |
| North Africa and Middle East | 2013 | 0.984389 | 0.993935 |
| North Africa and Middle East | 2014 | 0.990925 | 1.001141 |
| North Africa and Middle East | 2015 | 1.002549 | 1.012016 |
| North Africa and Middle East | 2016 | 1.010398 | 1.021392 |



1  
2  
3  
4  
5  
6  
7  
8  
9  
10  
11  
12  
13  
14  
15  
16  
17  
18  
19  
20  
21  
22  
23  
24  
25  
26  
27  
28  
29  
30  
31  
32  
33  
34  
35  
36  
37  
38  
39  
40  
41  
42  
43  
44  
45  
46

|                              |      |          |          |
|------------------------------|------|----------|----------|
| North Africa and Middle East | 2017 | 1.014892 | 1.02737  |
| North Africa and Middle East | 2018 | 1.018101 | 1.032525 |
| North Africa and Middle East | 2019 | 1.017794 | 1.032346 |
| Oceania                      | 1990 | 0.714981 | 0.712764 |
| Oceania                      | 1991 | 0.713966 | 0.709276 |
| Oceania                      | 1992 | 0.715391 | 0.707661 |
| Oceania                      | 1993 | 0.716127 | 0.705628 |
| Oceania                      | 1994 | 0.717851 | 0.704957 |
| Oceania                      | 1995 | 0.720437 | 0.708679 |
| Oceania                      | 1996 | 0.728436 | 0.718749 |
| Oceania                      | 1997 | 0.73471  | 0.724774 |
| Oceania                      | 1998 | 0.74027  | 0.731    |
| Oceania                      | 1999 | 0.740747 | 0.73015  |

|         |      |          |          |
|---------|------|----------|----------|
| Oceania | 2000 | 0.739459 | 0.729167 |
| Oceania | 2001 | 0.732115 | 0.724288 |
| Oceania | 2002 | 0.737227 | 0.727466 |
| Oceania | 2003 | 0.745093 | 0.73641  |
| Oceania | 2004 | 0.743631 | 0.734994 |
| Oceania | 2005 | 0.727771 | 0.719476 |
| Oceania | 2006 | 0.721573 | 0.712822 |
| Oceania | 2007 | 0.715807 | 0.705716 |
| Oceania | 2008 | 0.711278 | 0.705836 |
| Oceania | 2009 | 0.708497 | 0.704765 |
| Oceania | 2010 | 0.697016 | 0.695086 |
| Oceania | 2011 | 0.685978 | 0.686528 |
| Oceania | 2012 | 0.677235 | 0.68009  |

1  
2  
3  
4  
5  
6  
7  
8  
9  
10  
11  
12  
13  
14  
15  
16  
17  
18  
19  
20  
21  
22  
23  
24  
25  
26  
27  
28  
29  
30  
31  
32  
33  
34  
35  
36  
37  
38  
39  
40  
41  
42  
43  
44  
45  
46

|            |      |          |          |
|------------|------|----------|----------|
| Oceania    | 2013 | 0.672653 | 0.677716 |
| Oceania    | 2014 | 0.668907 | 0.674571 |
| Oceania    | 2015 | 0.668124 | 0.67487  |
| Oceania    | 2016 | 0.667828 | 0.674982 |
| Oceania    | 2017 | 0.664246 | 0.672026 |
| Oceania    | 2018 | 0.659172 | 0.669561 |
| Oceania    | 2019 | 0.660332 | 0.672439 |
| South Asia | 1990 | 0.66507  | 0.698583 |
| South Asia | 1991 | 0.661937 | 0.69396  |
| South Asia | 1992 | 0.675911 | 0.704971 |
| South Asia | 1993 | 0.671216 | 0.699226 |
| South Asia | 1994 | 0.670005 | 0.695142 |
| South Asia | 1995 | 0.673903 | 0.695892 |

|            |      |          |          |
|------------|------|----------|----------|
| South Asia | 1996 | 0.673456 | 0.689668 |
| South Asia | 1997 | 0.675591 | 0.688244 |
| South Asia | 1998 | 0.68373  | 0.697407 |
| South Asia | 1999 | 0.682567 | 0.698546 |
| South Asia | 2000 | 0.669169 | 0.681507 |
| South Asia | 2001 | 0.669284 | 0.679742 |
| South Asia | 2002 | 0.667592 | 0.676094 |
| South Asia | 2003 | 0.654533 | 0.65867  |
| South Asia | 2004 | 0.648943 | 0.64878  |
| South Asia | 2005 | 0.646784 | 0.643141 |
| South Asia | 2006 | 0.64926  | 0.645759 |
| South Asia | 2007 | 0.650865 | 0.646551 |
| South Asia | 2008 | 0.644718 | 0.637315 |

1  
2  
3  
4  
5  
6  
7  
8  
9  
10  
11  
12  
13  
14  
15  
16  
17  
18  
19  
20  
21  
22  
23  
24  
25  
26  
27  
28  
29  
30  
31  
32  
33  
34  
35  
36  
37  
38  
39  
40  
41  
42  
43  
44  
45  
46

|                |      |          |          |
|----------------|------|----------|----------|
| South Asia     | 2009 | 0.648902 | 0.634807 |
| South Asia     | 2010 | 0.661674 | 0.639831 |
| South Asia     | 2011 | 0.666136 | 0.642593 |
| South Asia     | 2012 | 0.677551 | 0.653581 |
| South Asia     | 2013 | 0.700175 | 0.664938 |
| South Asia     | 2014 | 0.725503 | 0.679458 |
| South Asia     | 2015 | 0.75062  | 0.703432 |
| South Asia     | 2016 | 0.752504 | 0.708796 |
| South Asia     | 2017 | 0.754074 | 0.711262 |
| South Asia     | 2018 | 0.755202 | 0.708314 |
| South Asia     | 2019 | 0.759717 | 0.712613 |
| Southeast Asia | 1990 | 0.996027 | 0.865118 |
| Southeast Asia | 1991 | 0.986435 | 0.857618 |

|                |      |          |          |
|----------------|------|----------|----------|
| Southeast Asia | 1992 | 0.979521 | 0.851068 |
| Southeast Asia | 1993 | 0.975002 | 0.847726 |
| Southeast Asia | 1994 | 0.966841 | 0.841815 |
| Southeast Asia | 1995 | 0.959653 | 0.8355   |
| Southeast Asia | 1996 | 0.958879 | 0.833157 |
| Southeast Asia | 1997 | 0.967228 | 0.835268 |
| Southeast Asia | 1998 | 0.968374 | 0.828115 |
| Southeast Asia | 1999 | 0.974419 | 0.832331 |
| Southeast Asia | 2000 | 0.982661 | 0.837888 |
| Southeast Asia | 2001 | 0.989978 | 0.845043 |
| Southeast Asia | 2002 | 1.00304  | 0.857111 |
| Southeast Asia | 2003 | 1.00702  | 0.86077  |
| Southeast Asia | 2004 | 1.010903 | 0.865647 |

|                |      |          |          |
|----------------|------|----------|----------|
| Southeast Asia | 2005 | 1.009594 | 0.864883 |
| Southeast Asia | 2006 | 1.006894 | 0.863283 |
| Southeast Asia | 2007 | 1.004802 | 0.862165 |
| Southeast Asia | 2008 | 0.998931 | 0.857502 |
| Southeast Asia | 2009 | 0.993168 | 0.853077 |
| Southeast Asia | 2010 | 0.985052 | 0.846161 |
| Southeast Asia | 2011 | 0.972286 | 0.836049 |
| Southeast Asia | 2012 | 0.961676 | 0.827129 |
| Southeast Asia | 2013 | 0.957614 | 0.824501 |
| Southeast Asia | 2014 | 0.947844 | 0.816169 |
| Southeast Asia | 2015 | 0.944072 | 0.811403 |
| Southeast Asia | 2016 | 0.944548 | 0.810911 |
| Southeast Asia | 2017 | 0.954061 | 0.817224 |

|                        |      |          |          |
|------------------------|------|----------|----------|
| Southeast Asia         | 2018 | 0.963672 | 0.823881 |
| Southeast Asia         | 2019 | 0.970656 | 0.827904 |
| Southern Latin America | 1990 | 0.836852 | 0.615026 |
| Southern Latin America | 1991 | 0.840997 | 0.616255 |
| Southern Latin America | 1992 | 0.838523 | 0.611796 |
| Southern Latin America | 1993 | 0.846781 | 0.613563 |
| Southern Latin America | 1994 | 0.858913 | 0.620038 |
| Southern Latin America | 1995 | 0.870687 | 0.623389 |
| Southern Latin America | 1996 | 0.877568 | 0.623542 |
| Southern Latin America | 1997 | 0.900245 | 0.635494 |
| Southern Latin America | 1998 | 0.924286 | 0.646916 |
| Southern Latin America | 1999 | 0.940666 | 0.653284 |
| Southern Latin America | 2000 | 0.951995 | 0.657239 |



1  
2  
3  
4  
5  
6  
7  
8  
9  
10  
11  
12  
13  
14  
15  
16  
17  
18  
19  
20  
21  
22  
23  
24  
25  
26  
27  
28  
29  
30  
31  
32  
33  
34  
35  
36  
37  
38  
39  
40  
41  
42  
43  
44  
45  
46

|                        |      |          |          |
|------------------------|------|----------|----------|
| Southern Latin America | 2001 | 0.954878 | 0.65674  |
| Southern Latin America | 2002 | 0.947038 | 0.648019 |
| Southern Latin America | 2003 | 0.954421 | 0.648565 |
| Southern Latin America | 2004 | 0.958557 | 0.647573 |
| Southern Latin America | 2005 | 0.957894 | 0.645642 |
| Southern Latin America | 2006 | 0.968127 | 0.651186 |
| Southern Latin America | 2007 | 0.96893  | 0.649748 |
| Southern Latin America | 2008 | 0.980789 | 0.657073 |
| Southern Latin America | 2009 | 0.982553 | 0.65619  |
| Southern Latin America | 2010 | 0.995161 | 0.660136 |
| Southern Latin America | 2011 | 1.000659 | 0.661048 |
| Southern Latin America | 2012 | 0.997452 | 0.658189 |
| Southern Latin America | 2013 | 1.004457 | 0.661778 |

|                             |      |          |          |
|-----------------------------|------|----------|----------|
| Southern Latin America      | 2014 | 1.008837 | 0.663532 |
| Southern Latin America      | 2015 | 1.005479 | 0.661634 |
| Southern Latin America      | 2016 | 0.998337 | 0.657825 |
| Southern Latin America      | 2017 | 0.994391 | 0.65736  |
| Southern Latin America      | 2018 | 0.995722 | 0.662491 |
| Southern Latin America      | 2019 | 0.992334 | 0.66318  |
| Southern Sub-Saharan Africa | 1990 | 0.799727 | 0.566804 |
| Southern Sub-Saharan Africa | 1991 | 0.776829 | 0.54927  |
| Southern Sub-Saharan Africa | 1992 | 0.820106 | 0.577714 |
| Southern Sub-Saharan Africa | 1993 | 0.774803 | 0.54824  |
| Southern Sub-Saharan Africa | 1994 | 0.788186 | 0.555732 |
| Southern Sub-Saharan Africa | 1995 | 0.709621 | 0.502163 |
| Southern Sub-Saharan Africa | 1996 | 0.706395 | 0.498609 |

1  
2  
3  
4  
5  
6  
7  
8  
9  
10  
11  
12  
13  
14  
15  
16  
17  
18  
19  
20  
21  
22  
23  
24  
25  
26  
27  
28  
29  
30  
31  
32  
33  
34  
35  
36  
37  
38  
39  
40  
41  
42  
43  
44  
45  
46

|                             |      |          |          |
|-----------------------------|------|----------|----------|
| Southern Sub-Saharan Africa | 1997 | 0.742709 | 0.519068 |
| Southern Sub-Saharan Africa | 1998 | 0.733636 | 0.510162 |
| Southern Sub-Saharan Africa | 1999 | 0.753431 | 0.518147 |
| Southern Sub-Saharan Africa | 2000 | 0.778592 | 0.53112  |
| Southern Sub-Saharan Africa | 2001 | 0.780906 | 0.52916  |
| Southern Sub-Saharan Africa | 2002 | 0.791602 | 0.532937 |
| Southern Sub-Saharan Africa | 2003 | 0.798728 | 0.534572 |
| Southern Sub-Saharan Africa | 2004 | 0.802828 | 0.536106 |
| Southern Sub-Saharan Africa | 2005 | 0.800053 | 0.534634 |
| Southern Sub-Saharan Africa | 2006 | 0.805583 | 0.537221 |
| Southern Sub-Saharan Africa | 2007 | 0.802574 | 0.536309 |
| Southern Sub-Saharan Africa | 2008 | 0.807065 | 0.539654 |
| Southern Sub-Saharan Africa | 2009 | 0.812728 | 0.542922 |

|                             |      |          |          |
|-----------------------------|------|----------|----------|
| Southern Sub-Saharan Africa | 2010 | 0.815654 | 0.542544 |
| Southern Sub-Saharan Africa | 2011 | 0.825888 | 0.547379 |
| Southern Sub-Saharan Africa | 2012 | 0.83456  | 0.554376 |
| Southern Sub-Saharan Africa | 2013 | 0.843888 | 0.56142  |
| Southern Sub-Saharan Africa | 2014 | 0.858826 | 0.572506 |
| Southern Sub-Saharan Africa | 2015 | 0.861626 | 0.576232 |
| Southern Sub-Saharan Africa | 2016 | 0.862458 | 0.57647  |
| Southern Sub-Saharan Africa | 2017 | 0.850199 | 0.571158 |
| Southern Sub-Saharan Africa | 2018 | 0.834525 | 0.564877 |
| Southern Sub-Saharan Africa | 2019 | 0.832604 | 0.566608 |
| Tropical Latin America      | 1990 | 0.868384 | 0.734218 |
| Tropical Latin America      | 1991 | 0.871664 | 0.732863 |
| Tropical Latin America      | 1992 | 0.872822 | 0.730195 |

|                        |      |          |          |
|------------------------|------|----------|----------|
| Tropical Latin America | 1993 | 0.870659 | 0.725086 |
| Tropical Latin America | 1994 | 0.872989 | 0.725556 |
| Tropical Latin America | 1995 | 0.8882   | 0.736898 |
| Tropical Latin America | 1996 | 0.90161  | 0.748706 |
| Tropical Latin America | 1997 | 0.912623 | 0.755214 |
| Tropical Latin America | 1998 | 0.915054 | 0.754469 |
| Tropical Latin America | 1999 | 0.919973 | 0.756125 |
| Tropical Latin America | 2000 | 0.92274  | 0.755265 |
| Tropical Latin America | 2001 | 0.92301  | 0.75235  |
| Tropical Latin America | 2002 | 0.925579 | 0.750251 |
| Tropical Latin America | 2003 | 0.914222 | 0.737044 |
| Tropical Latin America | 2004 | 0.908803 | 0.729144 |
| Tropical Latin America | 2005 | 0.909014 | 0.726955 |

|                        |      |          |          |
|------------------------|------|----------|----------|
| Tropical Latin America | 2006 | 0.914548 | 0.728219 |
| Tropical Latin America | 2007 | 0.91622  | 0.726039 |
| Tropical Latin America | 2008 | 0.918839 | 0.724886 |
| Tropical Latin America | 2009 | 0.924596 | 0.725983 |
| Tropical Latin America | 2010 | 0.927897 | 0.724711 |
| Tropical Latin America | 2011 | 0.927844 | 0.721599 |
| Tropical Latin America | 2012 | 0.930201 | 0.720433 |
| Tropical Latin America | 2013 | 0.92795  | 0.715936 |
| Tropical Latin America | 2014 | 0.925154 | 0.711512 |
| Tropical Latin America | 2015 | 0.925393 | 0.70904  |
| Tropical Latin America | 2016 | 0.917662 | 0.700946 |
| Tropical Latin America | 2017 | 0.92015  | 0.701317 |
| Tropical Latin America | 2018 | 0.927136 | 0.707273 |

1  
2  
3  
4  
5  
6  
7  
8  
9  
10  
11  
12  
13  
14  
15  
16  
17  
18  
19  
20  
21  
22  
23  
24  
25  
26  
27  
28  
29  
30  
31  
32  
33  
34  
35  
36  
37  
38  
39  
40  
41  
42  
43  
44  
45  
46

|                        |      |          |          |
|------------------------|------|----------|----------|
| Tropical Latin America | 2019 | 0.922426 | 0.703827 |
| Western Europe         | 1990 | 1.187221 | 0.636881 |
| Western Europe         | 1991 | 1.17978  | 0.631171 |
| Western Europe         | 1992 | 1.179064 | 0.629347 |
| Western Europe         | 1993 | 1.181449 | 0.629072 |
| Western Europe         | 1994 | 1.189826 | 0.632836 |
| Western Europe         | 1995 | 1.191172 | 0.631937 |
| Western Europe         | 1996 | 1.195132 | 0.632473 |
| Western Europe         | 1997 | 1.206631 | 0.637573 |
| Western Europe         | 1998 | 1.213062 | 0.641914 |
| Western Europe         | 1999 | 1.216683 | 0.643583 |
| Western Europe         | 2000 | 1.234761 | 0.651178 |
| Western Europe         | 2001 | 1.2483   | 0.658031 |

|                |      |          |          |
|----------------|------|----------|----------|
| Western Europe | 2002 | 1.257153 | 0.663607 |
| Western Europe | 2003 | 1.260606 | 0.667379 |
| Western Europe | 2004 | 1.27021  | 0.674738 |
| Western Europe | 2005 | 1.276144 | 0.679276 |
| Western Europe | 2006 | 1.279993 | 0.683381 |
| Western Europe | 2007 | 1.283076 | 0.68944  |
| Western Europe | 2008 | 1.289726 | 0.697937 |
| Western Europe | 2009 | 1.287437 | 0.701796 |
| Western Europe | 2010 | 1.288567 | 0.70405  |
| Western Europe | 2011 | 1.303959 | 0.711458 |
| Western Europe | 2012 | 1.310276 | 0.715725 |
| Western Europe | 2013 | 1.313979 | 0.720856 |
| Western Europe | 2014 | 1.317178 | 0.725604 |



|                            |      |          |          |
|----------------------------|------|----------|----------|
| Western Europe             | 2015 | 1.310931 | 0.726156 |
| Western Europe             | 2016 | 1.310262 | 0.730428 |
| Western Europe             | 2017 | 1.285904 | 0.726461 |
| Western Europe             | 2018 | 1.279483 | 0.731767 |
| Western Europe             | 2019 | 1.263779 | 0.731772 |
| Western Sub-Saharan Africa | 1990 | 0.943231 | 0.876176 |
| Western Sub-Saharan Africa | 1991 | 0.93766  | 0.874746 |
| Western Sub-Saharan Africa | 1992 | 0.931574 | 0.874356 |
| Western Sub-Saharan Africa | 1993 | 0.922468 | 0.87055  |
| Western Sub-Saharan Africa | 1994 | 0.915253 | 0.867589 |
| Western Sub-Saharan Africa | 1995 | 0.906125 | 0.861331 |
| Western Sub-Saharan Africa | 1996 | 0.896934 | 0.855647 |
| Western Sub-Saharan Africa | 1997 | 0.893333 | 0.854683 |

|                            |      |          |          |
|----------------------------|------|----------|----------|
| Western Sub-Saharan Africa | 1998 | 0.884804 | 0.84926  |
| Western Sub-Saharan Africa | 1999 | 0.870291 | 0.83736  |
| Western Sub-Saharan Africa | 2000 | 0.86047  | 0.828306 |
| Western Sub-Saharan Africa | 2001 | 0.852357 | 0.822349 |
| Western Sub-Saharan Africa | 2002 | 0.846533 | 0.817614 |
| Western Sub-Saharan Africa | 2003 | 0.839041 | 0.812645 |
| Western Sub-Saharan Africa | 2004 | 0.830404 | 0.80605  |
| Western Sub-Saharan Africa | 2005 | 0.822259 | 0.798324 |
| Western Sub-Saharan Africa | 2006 | 0.817552 | 0.793607 |
| Western Sub-Saharan Africa | 2007 | 0.812308 | 0.787728 |
| Western Sub-Saharan Africa | 2008 | 0.805224 | 0.779451 |
| Western Sub-Saharan Africa | 2009 | 0.79906  | 0.771461 |
| Western Sub-Saharan Africa | 2010 | 0.794901 | 0.76539  |

1  
2  
3  
4  
5  
6  
7  
8  
9  
10  
11  
12  
13  
14  
15  
16  
17  
18  
19  
20  
21  
22  
23  
24  
25  
26  
27  
28  
29  
30  
31  
32  
33  
34  
35  
36  
37  
38  
39  
40  
41  
42  
43  
44  
45  
46

|                            |      |          |          |
|----------------------------|------|----------|----------|
| Western Sub-Saharan Africa | 2011 | 0.793234 | 0.761174 |
| Western Sub-Saharan Africa | 2012 | 0.793325 | 0.757741 |
| Western Sub-Saharan Africa | 2013 | 0.790147 | 0.750627 |
| Western Sub-Saharan Africa | 2014 | 0.79643  | 0.752517 |
| Western Sub-Saharan Africa | 2015 | 0.804319 | 0.755615 |
| Western Sub-Saharan Africa | 2016 | 0.812327 | 0.759468 |
| Western Sub-Saharan Africa | 2017 | 0.822265 | 0.764697 |
| Western Sub-Saharan Africa | 2018 | 0.830106 | 0.768468 |
| Western Sub-Saharan Africa | 2019 | 0.839655 | 0.773633 |

**Supplemental table 6. Death cases ratio between females to males and age-standardized death rate (ASDR) ratio between females to males in 204 countries and territories from 1990 to 2019 in 204 countries.**

| location    | year | Ratio of female to male death cases | Ratio of female ASDR to male ASDR |
|-------------|------|-------------------------------------|-----------------------------------|
| Afghanistan | 1990 | 0.961218                            | 0.963112                          |
| Afghanistan | 1991 | 0.961054                            | 0.95357                           |
| Afghanistan | 1992 | 0.957648                            | 0.93756                           |
| Afghanistan | 1993 | 0.960475                            | 0.930057                          |
| Afghanistan | 1994 | 0.965727                            | 0.927966                          |
| Afghanistan | 1995 | 0.967031                            | 0.922941                          |
| Afghanistan | 1996 | 0.96932                             | 0.918637                          |
| Afghanistan | 1997 | 0.969684                            | 0.912595                          |
| Afghanistan | 1998 | 0.972555                            | 0.909395                          |
| Afghanistan | 1999 | 0.980011                            | 0.90888                           |
| Afghanistan | 2000 | 0.985626                            | 0.909379                          |
| Afghanistan | 2001 | 0.993832                            | 0.910933                          |
| Afghanistan | 2002 | 1.000351                            | 0.912563                          |
| Afghanistan | 2003 | 1.015199                            | 0.919405                          |
| Afghanistan | 2004 | 1.036288                            | 0.930023                          |
| Afghanistan | 2005 | 1.050515                            | 0.939235                          |
| Afghanistan | 2006 | 1.060058                            | 0.943996                          |
| Afghanistan | 2007 | 1.06658                             | 0.947329                          |
| Afghanistan | 2008 | 1.078541                            | 0.954077                          |
| Afghanistan | 2009 | 1.09462                             | 0.962852                          |
| Afghanistan | 2010 | 1.110446                            | 0.974819                          |

1  
2  
3  
4  
5  
6  
7  
8  
9  
10  
11  
12  
13  
14  
15  
16  
17  
18  
19  
20  
21  
22  
23  
24  
25  
26  
27  
28  
29  
30  
31  
32  
33  
34  
35  
36  
37  
38  
39  
40  
41  
42  
43  
44  
45  
46

|             |      |          |          |
|-------------|------|----------|----------|
| Afghanistan | 2011 | 1.121862 | 0.982551 |
| Afghanistan | 2012 | 1.126085 | 0.985505 |
| Afghanistan | 2013 | 1.135187 | 0.991014 |
| Afghanistan | 2014 | 1.143462 | 0.994594 |
| Afghanistan | 2015 | 1.148955 | 1.000242 |
| Afghanistan | 2016 | 1.158044 | 1.008886 |
| Afghanistan | 2017 | 1.170556 | 1.019302 |
| Afghanistan | 2018 | 1.180678 | 1.02524  |
| Afghanistan | 2019 | 1.191846 | 1.032065 |
| Albania     | 1990 | 0.80288  | 0.611067 |
| Albania     | 1991 | 0.824545 | 0.633067 |
| Albania     | 1992 | 0.847876 | 0.64608  |
| Albania     | 1993 | 0.8389   | 0.634173 |
| Albania     | 1994 | 0.851827 | 0.63936  |
| Albania     | 1995 | 0.863218 | 0.645539 |
| Albania     | 1996 | 0.835124 | 0.620725 |
| Albania     | 1997 | 0.820214 | 0.614118 |
| Albania     | 1998 | 0.796342 | 0.603217 |
| Albania     | 1999 | 0.836725 | 0.632571 |
| Albania     | 2000 | 0.801031 | 0.607676 |
| Albania     | 2001 | 0.800875 | 0.612752 |
| Albania     | 2002 | 0.818988 | 0.631664 |
| Albania     | 2003 | 0.829379 | 0.645643 |
| Albania     | 2004 | 0.814148 | 0.640171 |
| Albania     | 2005 | 0.844958 | 0.66871  |

|    |         |      |          |          |
|----|---------|------|----------|----------|
| 1  |         |      |          |          |
| 2  |         |      |          |          |
| 3  |         |      |          |          |
| 4  |         |      |          |          |
| 5  | Albania | 2006 | 0.861627 | 0.685951 |
| 6  | Albania | 2007 | 0.878193 | 0.701901 |
| 7  | Albania | 2008 | 0.873395 | 0.701159 |
| 8  | Albania | 2009 | 0.851996 | 0.687584 |
| 9  | Albania | 2010 | 0.836195 | 0.676588 |
| 10 | Albania | 2011 | 0.829811 | 0.676367 |
| 11 | Albania | 2012 | 0.835089 | 0.683686 |
| 12 | Albania | 2013 | 0.835903 | 0.687582 |
| 13 | Albania | 2014 | 0.819922 | 0.678315 |
| 14 | Albania | 2015 | 0.807743 | 0.670891 |
| 15 | Albania | 2016 | 0.816522 | 0.677372 |
| 16 | Albania | 2017 | 0.824754 | 0.682594 |
| 17 | Albania | 2018 | 0.833083 | 0.687361 |
| 18 | Albania | 2019 | 0.84051  | 0.691033 |
| 19 | Algeria | 1990 | 1.109457 | 1.137995 |
| 20 | Algeria | 1991 | 1.109573 | 1.103907 |
| 21 | Algeria | 1992 | 1.104276 | 1.086803 |
| 22 | Algeria | 1993 | 1.099944 | 1.074033 |
| 23 | Algeria | 1994 | 1.107022 | 1.066426 |
| 24 | Algeria | 1995 | 1.109373 | 1.065159 |
| 25 | Algeria | 1996 | 1.112722 | 1.065549 |
| 26 | Algeria | 1997 | 1.105399 | 1.055999 |
| 27 | Algeria | 1998 | 1.093316 | 1.043813 |
| 28 | Algeria | 1999 | 1.103667 | 1.053381 |
| 29 | Algeria | 2000 | 1.110872 | 1.065961 |
| 30 |         |      |          |          |
| 31 |         |      |          |          |
| 32 |         |      |          |          |
| 33 |         |      |          |          |
| 34 |         |      |          |          |
| 35 |         |      |          |          |
| 36 |         |      |          |          |
| 37 |         |      |          |          |
| 38 |         |      |          |          |
| 39 |         |      |          |          |
| 40 |         |      |          |          |
| 41 |         |      |          |          |
| 42 |         |      |          |          |
| 43 |         |      |          |          |
| 44 |         |      |          |          |
| 45 |         |      |          |          |
| 46 |         |      |          |          |

1  
2  
3  
4  
5  
6  
7  
8  
9  
10  
11  
12  
13  
14  
15  
16  
17  
18  
19  
20  
21  
22  
23  
24  
25  
26  
27  
28  
29  
30  
31  
32  
33  
34  
35  
36  
37  
38  
39  
40  
41  
42  
43  
44  
45  
46

|                |      |          |          |
|----------------|------|----------|----------|
| Algeria        | 2001 | 1.113195 | 1.075515 |
| Algeria        | 2002 | 1.11772  | 1.088375 |
| Algeria        | 2003 | 1.119067 | 1.111271 |
| Algeria        | 2004 | 1.136506 | 1.142565 |
| Algeria        | 2005 | 1.14715  | 1.169811 |
| Algeria        | 2006 | 1.15201  | 1.190973 |
| Algeria        | 2007 | 1.155168 | 1.209171 |
| Algeria        | 2008 | 1.15859  | 1.228457 |
| Algeria        | 2009 | 1.163619 | 1.248209 |
| Algeria        | 2010 | 1.177218 | 1.286784 |
| Algeria        | 2011 | 1.186641 | 1.312148 |
| Algeria        | 2012 | 1.189601 | 1.324703 |
| Algeria        | 2013 | 1.204505 | 1.349103 |
| Algeria        | 2014 | 1.219508 | 1.372427 |
| Algeria        | 2015 | 1.223912 | 1.38569  |
| Algeria        | 2016 | 1.212958 | 1.379575 |
| Algeria        | 2017 | 1.211995 | 1.380939 |
| Algeria        | 2018 | 1.241531 | 1.414697 |
| Algeria        | 2019 | 1.249033 | 1.426351 |
| American Samoa | 1990 | 0.612611 | 0.596702 |
| American Samoa | 1991 | 0.61697  | 0.598437 |
| American Samoa | 1992 | 0.631844 | 0.608174 |
| American Samoa | 1993 | 0.653989 | 0.623514 |
| American Samoa | 1994 | 0.681528 | 0.645433 |
| American Samoa | 1995 | 0.704734 | 0.662102 |

|                |      |          |          |
|----------------|------|----------|----------|
| American Samoa | 1996 | 0.730556 | 0.680042 |
| American Samoa | 1997 | 0.750686 | 0.692616 |
| American Samoa | 1998 | 0.768062 | 0.702708 |
| American Samoa | 1999 | 0.803672 | 0.728942 |
| American Samoa | 2000 | 0.82894  | 0.746903 |
| American Samoa | 2001 | 0.858097 | 0.770038 |
| American Samoa | 2002 | 0.853244 | 0.762156 |
| American Samoa | 2003 | 0.879136 | 0.781717 |
| American Samoa | 2004 | 0.893409 | 0.791329 |
| American Samoa | 2005 | 0.864685 | 0.762067 |
| American Samoa | 2006 | 0.856831 | 0.751596 |
| American Samoa | 2007 | 0.840159 | 0.734654 |
| American Samoa | 2008 | 0.82017  | 0.71572  |
| American Samoa | 2009 | 0.807269 | 0.703181 |
| American Samoa | 2010 | 0.797999 | 0.692814 |
| American Samoa | 2011 | 0.806261 | 0.69851  |
| American Samoa | 2012 | 0.825197 | 0.714836 |
| American Samoa | 2013 | 0.829821 | 0.719759 |
| American Samoa | 2014 | 0.829493 | 0.720731 |
| American Samoa | 2015 | 0.835253 | 0.726995 |
| American Samoa | 2016 | 0.834591 | 0.726271 |
| American Samoa | 2017 | 0.83428  | 0.726919 |
| American Samoa | 2018 | 0.833313 | 0.727019 |
| American Samoa | 2019 | 0.832801 | 0.72741  |
| Andorra        | 1990 | 0.788861 | 0.729791 |



|    |         |      |          |          |
|----|---------|------|----------|----------|
| 1  |         |      |          |          |
| 2  |         |      |          |          |
| 3  |         |      |          |          |
| 4  |         |      |          |          |
| 5  | Andorra | 1991 | 0.777657 | 0.721833 |
| 6  | Andorra | 1992 | 0.786613 | 0.72433  |
| 7  | Andorra | 1993 | 0.799267 | 0.736144 |
| 8  | Andorra | 1994 | 0.822512 | 0.748494 |
| 9  | Andorra | 1995 | 0.815241 | 0.73957  |
| 10 | Andorra | 1996 | 0.812205 | 0.734919 |
| 11 | Andorra | 1997 | 0.819344 | 0.731837 |
| 12 | Andorra | 1998 | 0.822769 | 0.728802 |
| 13 | Andorra | 1999 | 0.83361  | 0.726268 |
| 14 | Andorra | 2000 | 0.838352 | 0.725112 |
| 15 | Andorra | 2001 | 0.84257  | 0.723152 |
| 16 | Andorra | 2002 | 0.857376 | 0.721192 |
| 17 | Andorra | 2003 | 0.855856 | 0.717126 |
| 18 | Andorra | 2004 | 0.880115 | 0.725276 |
| 19 | Andorra | 2005 | 0.88978  | 0.727032 |
| 20 | Andorra | 2006 | 0.905426 | 0.732969 |
| 21 | Andorra | 2007 | 0.920575 | 0.73044  |
| 22 | Andorra | 2008 | 0.930871 | 0.739732 |
| 23 | Andorra | 2009 | 0.966364 | 0.755799 |
| 24 | Andorra | 2010 | 0.984365 | 0.766113 |
| 25 | Andorra | 2011 | 1.019081 | 0.772799 |
| 26 | Andorra | 2012 | 1.070344 | 0.791319 |
| 27 | Andorra | 2013 | 1.089581 | 0.811453 |
| 28 | Andorra | 2014 | 1.126724 | 0.832771 |
| 29 | Andorra | 2015 | 1.162229 | 0.859118 |
| 30 |         |      |          |          |
| 31 |         |      |          |          |
| 32 |         |      |          |          |
| 33 |         |      |          |          |
| 34 |         |      |          |          |
| 35 |         |      |          |          |
| 36 |         |      |          |          |
| 37 |         |      |          |          |
| 38 |         |      |          |          |
| 39 |         |      |          |          |
| 40 |         |      |          |          |
| 41 |         |      |          |          |
| 42 |         |      |          |          |
| 43 |         |      |          |          |
| 44 |         |      |          |          |
| 45 |         |      |          |          |
| 46 |         |      |          |          |

|         |      |          |          |
|---------|------|----------|----------|
| Andorra | 2016 | 1.164998 | 0.860014 |
| Andorra | 2017 | 1.180541 | 0.862883 |
| Andorra | 2018 | 1.169541 | 0.866757 |
| Andorra | 2019 | 1.178874 | 0.871085 |
| Angola  | 1990 | 0.537106 | 0.457811 |
| Angola  | 1991 | 0.544217 | 0.460671 |
| Angola  | 1992 | 0.551135 | 0.46428  |
| Angola  | 1993 | 0.559343 | 0.468348 |
| Angola  | 1994 | 0.567008 | 0.47207  |
| Angola  | 1995 | 0.57392  | 0.474355 |
| Angola  | 1996 | 0.582053 | 0.476191 |
| Angola  | 1997 | 0.592023 | 0.480883 |
| Angola  | 1998 | 0.602272 | 0.487081 |
| Angola  | 1999 | 0.616042 | 0.494658 |
| Angola  | 2000 | 0.625475 | 0.49915  |
| Angola  | 2001 | 0.625067 | 0.497084 |
| Angola  | 2002 | 0.651311 | 0.513815 |
| Angola  | 2003 | 0.668571 | 0.527179 |
| Angola  | 2004 | 0.671047 | 0.528362 |
| Angola  | 2005 | 0.66996  | 0.528374 |
| Angola  | 2006 | 0.653598 | 0.518225 |
| Angola  | 2007 | 0.639537 | 0.508693 |
| Angola  | 2008 | 0.641562 | 0.510323 |
| Angola  | 2009 | 0.636395 | 0.509296 |
| Angola  | 2010 | 0.633737 | 0.507852 |

1  
2  
3  
4  
5  
6  
7  
8  
9  
10  
11  
12  
13  
14  
15  
16  
17  
18  
19  
20  
21  
22  
23  
24  
25  
26  
27  
28  
29  
30  
31  
32  
33  
34  
35  
36  
37  
38  
39  
40  
41  
42  
43  
44  
45  
46

|                     |      |          |          |
|---------------------|------|----------|----------|
| Angola              | 2011 | 0.627955 | 0.505033 |
| Angola              | 2012 | 0.619494 | 0.500108 |
| Angola              | 2013 | 0.615684 | 0.497491 |
| Angola              | 2014 | 0.611861 | 0.494839 |
| Angola              | 2015 | 0.618424 | 0.500956 |
| Angola              | 2016 | 0.629456 | 0.509579 |
| Angola              | 2017 | 0.635562 | 0.517839 |
| Angola              | 2018 | 0.641232 | 0.523674 |
| Angola              | 2019 | 0.647501 | 0.530396 |
| Antigua and Barbuda | 1990 | 0.666514 | 0.446543 |
| Antigua and Barbuda | 1991 | 0.715685 | 0.478107 |
| Antigua and Barbuda | 1992 | 0.714282 | 0.479608 |
| Antigua and Barbuda | 1993 | 0.732266 | 0.493697 |
| Antigua and Barbuda | 1994 | 0.736436 | 0.499464 |
| Antigua and Barbuda | 1995 | 0.737658 | 0.502559 |
| Antigua and Barbuda | 1996 | 0.834084 | 0.578888 |
| Antigua and Barbuda | 1997 | 0.849233 | 0.599587 |
| Antigua and Barbuda | 1998 | 0.856383 | 0.615655 |
| Antigua and Barbuda | 1999 | 0.86549  | 0.631337 |
| Antigua and Barbuda | 2000 | 0.88497  | 0.654818 |
| Antigua and Barbuda | 2001 | 0.922952 | 0.693046 |
| Antigua and Barbuda | 2002 | 0.937509 | 0.716928 |
| Antigua and Barbuda | 2003 | 0.931884 | 0.725553 |
| Antigua and Barbuda | 2004 | 0.928461 | 0.73322  |
| Antigua and Barbuda | 2005 | 0.915143 | 0.734142 |

|                     |      |          |          |
|---------------------|------|----------|----------|
| Antigua and Barbuda | 2006 | 0.886643 | 0.717462 |
| Antigua and Barbuda | 2007 | 0.737094 | 0.586594 |
| Antigua and Barbuda | 2008 | 0.740284 | 0.585623 |
| Antigua and Barbuda | 2009 | 0.834307 | 0.66124  |
| Antigua and Barbuda | 2010 | 0.855069 | 0.67682  |
| Antigua and Barbuda | 2011 | 0.878277 | 0.69395  |
| Antigua and Barbuda | 2012 | 0.910791 | 0.720486 |
| Antigua and Barbuda | 2013 | 0.946769 | 0.754748 |
| Antigua and Barbuda | 2014 | 0.946533 | 0.756041 |
| Antigua and Barbuda | 2015 | 0.944465 | 0.754486 |
| Antigua and Barbuda | 2016 | 0.949086 | 0.759164 |
| Antigua and Barbuda | 2017 | 0.961636 | 0.775668 |
| Antigua and Barbuda | 2018 | 0.955232 | 0.775363 |
| Antigua and Barbuda | 2019 | 0.938257 | 0.764103 |
| Argentina           | 1990 | 0.816301 | 0.592396 |
| Argentina           | 1991 | 0.81505  | 0.589561 |
| Argentina           | 1992 | 0.809108 | 0.582187 |
| Argentina           | 1993 | 0.820178 | 0.585302 |
| Argentina           | 1994 | 0.835615 | 0.593134 |
| Argentina           | 1995 | 0.852727 | 0.599872 |
| Argentina           | 1996 | 0.864933 | 0.604446 |
| Argentina           | 1997 | 0.887958 | 0.615809 |
| Argentina           | 1998 | 0.911821 | 0.626255 |
| Argentina           | 1999 | 0.926667 | 0.630847 |
| Argentina           | 2000 | 0.937797 | 0.633938 |

|    |           |      |          |          |
|----|-----------|------|----------|----------|
| 1  |           |      |          |          |
| 2  |           |      |          |          |
| 3  |           |      |          |          |
| 4  |           |      |          |          |
| 5  | Argentina | 2001 | 0.936522 | 0.629952 |
| 6  | Argentina | 2002 | 0.926919 | 0.620389 |
| 7  | Argentina | 2003 | 0.93253  | 0.619629 |
| 8  | Argentina | 2004 | 0.932059 | 0.61577  |
| 9  | Argentina | 2005 | 0.927467 | 0.611552 |
| 10 | Argentina | 2006 | 0.939197 | 0.617824 |
| 11 | Argentina | 2007 | 0.941492 | 0.617118 |
| 12 | Argentina | 2008 | 0.95441  | 0.62448  |
| 13 | Argentina | 2009 | 0.959719 | 0.625646 |
| 14 | Argentina | 2010 | 0.973276 | 0.629635 |
| 15 | Argentina | 2011 | 0.975477 | 0.628524 |
| 16 | Argentina | 2012 | 0.967782 | 0.622803 |
| 17 | Argentina | 2013 | 0.976495 | 0.626864 |
| 18 | Argentina | 2014 | 0.98453  | 0.630903 |
| 19 | Argentina | 2015 | 0.977509 | 0.626764 |
| 20 | Argentina | 2016 | 0.966372 | 0.620702 |
| 21 | Argentina | 2017 | 0.958121 | 0.617106 |
| 22 | Argentina | 2018 | 0.958598 | 0.622691 |
| 23 | Argentina | 2019 | 0.954191 | 0.623212 |
| 24 | Armenia   | 1990 | 0.780068 | 0.518728 |
| 25 | Armenia   | 1991 | 0.765191 | 0.508548 |
| 26 | Armenia   | 1992 | 0.777493 | 0.518524 |
| 27 | Armenia   | 1993 | 0.769502 | 0.514966 |
| 28 | Armenia   | 1994 | 0.767158 | 0.520619 |
| 29 | Armenia   | 1995 | 0.837447 | 0.570209 |
| 30 |           |      |          |          |
| 31 |           |      |          |          |
| 32 |           |      |          |          |
| 33 |           |      |          |          |
| 34 |           |      |          |          |
| 35 |           |      |          |          |
| 36 |           |      |          |          |
| 37 |           |      |          |          |
| 38 |           |      |          |          |
| 39 |           |      |          |          |
| 40 |           |      |          |          |
| 41 |           |      |          |          |
| 42 |           |      |          |          |
| 43 |           |      |          |          |
| 44 |           |      |          |          |
| 45 |           |      |          |          |
| 46 |           |      |          |          |

|           |      |          |          |
|-----------|------|----------|----------|
| Armenia   | 1996 | 0.883948 | 0.61161  |
| Armenia   | 1997 | 0.932501 | 0.658905 |
| Armenia   | 1998 | 0.992186 | 0.709891 |
| Armenia   | 1999 | 0.977642 | 0.704145 |
| Armenia   | 2000 | 0.989377 | 0.713448 |
| Armenia   | 2001 | 0.993407 | 0.722184 |
| Armenia   | 2002 | 0.975439 | 0.707534 |
| Armenia   | 2003 | 0.984779 | 0.705606 |
| Armenia   | 2004 | 0.973642 | 0.687817 |
| Armenia   | 2005 | 0.955851 | 0.670541 |
| Armenia   | 2006 | 0.928028 | 0.650275 |
| Armenia   | 2007 | 1.000884 | 0.697835 |
| Armenia   | 2008 | 0.930024 | 0.654575 |
| Armenia   | 2009 | 0.907739 | 0.639381 |
| Armenia   | 2010 | 0.891967 | 0.618215 |
| Armenia   | 2011 | 0.858252 | 0.593996 |
| Armenia   | 2012 | 0.895746 | 0.620641 |
| Armenia   | 2013 | 0.90243  | 0.62339  |
| Armenia   | 2014 | 0.879924 | 0.604729 |
| Armenia   | 2015 | 0.827098 | 0.568261 |
| Armenia   | 2016 | 0.836569 | 0.574202 |
| Armenia   | 2017 | 0.838073 | 0.573061 |
| Armenia   | 2018 | 0.837492 | 0.569781 |
| Armenia   | 2019 | 0.833053 | 0.566864 |
| Australia | 1990 | 1.294494 | 0.755478 |

1  
2  
3  
4  
5  
6  
7  
8  
9  
10  
11  
12  
13  
14  
15  
16  
17  
18  
19  
20  
21  
22  
23  
24  
25  
26  
27  
28  
29  
30  
31  
32  
33  
34  
35  
36  
37  
38  
39  
40  
41  
42  
43  
44  
45  
46

|           |      |          |          |
|-----------|------|----------|----------|
| Australia | 1991 | 1.288997 | 0.756474 |
| Australia | 1992 | 1.268926 | 0.745579 |
| Australia | 1993 | 1.241153 | 0.728202 |
| Australia | 1994 | 1.226829 | 0.71809  |
| Australia | 1995 | 1.231699 | 0.722381 |
| Australia | 1996 | 1.205226 | 0.709841 |
| Australia | 1997 | 1.191066 | 0.708118 |
| Australia | 1998 | 1.152601 | 0.688628 |
| Australia | 1999 | 1.152189 | 0.689831 |
| Australia | 2000 | 1.138176 | 0.683865 |
| Australia | 2001 | 1.12561  | 0.679441 |
| Australia | 2002 | 1.117703 | 0.674985 |
| Australia | 2003 | 1.095849 | 0.664528 |
| Australia | 2004 | 1.115103 | 0.677657 |
| Australia | 2005 | 1.135883 | 0.692902 |
| Australia | 2006 | 1.143659 | 0.700868 |
| Australia | 2007 | 1.154737 | 0.713041 |
| Australia | 2008 | 1.155029 | 0.717956 |
| Australia | 2009 | 1.164055 | 0.73019  |
| Australia | 2010 | 1.152713 | 0.728706 |
| Australia | 2011 | 1.141979 | 0.729099 |
| Australia | 2012 | 1.137162 | 0.734577 |
| Australia | 2013 | 1.125903 | 0.736751 |
| Australia | 2014 | 1.120436 | 0.740431 |
| Australia | 2015 | 1.10876  | 0.740356 |

|           |      |          |          |
|-----------|------|----------|----------|
| Australia | 2016 | 1.102751 | 0.742331 |
| Australia | 2017 | 1.080546 | 0.734664 |
| Australia | 2018 | 1.068638 | 0.734484 |
| Australia | 2019 | 1.053569 | 0.730815 |
| Austria   | 1990 | 1.516235 | 0.715717 |
| Austria   | 1991 | 1.500515 | 0.705711 |
| Austria   | 1992 | 1.491132 | 0.697389 |
| Austria   | 1993 | 1.491922 | 0.696126 |
| Austria   | 1994 | 1.498083 | 0.695299 |
| Austria   | 1995 | 1.517538 | 0.698785 |
| Austria   | 1996 | 1.50472  | 0.689712 |
| Austria   | 1997 | 1.501237 | 0.682791 |
| Austria   | 1998 | 1.494367 | 0.680545 |
| Austria   | 1999 | 1.525297 | 0.695688 |
| Austria   | 2000 | 1.552982 | 0.710282 |
| Austria   | 2001 | 1.556454 | 0.717181 |
| Austria   | 2002 | 1.552057 | 0.722238 |
| Austria   | 2003 | 1.575332 | 0.743031 |
| Austria   | 2004 | 1.543781 | 0.734121 |
| Austria   | 2005 | 1.566323 | 0.744065 |
| Austria   | 2006 | 1.565154 | 0.746048 |
| Austria   | 2007 | 1.574945 | 0.754747 |
| Austria   | 2008 | 1.579287 | 0.761531 |
| Austria   | 2009 | 1.5496   | 0.756153 |
| Austria   | 2010 | 1.565489 | 0.765797 |



|    |            |      |          |          |
|----|------------|------|----------|----------|
| 1  |            |      |          |          |
| 2  |            |      |          |          |
| 3  |            |      |          |          |
| 4  |            |      |          |          |
| 5  | Austria    | 2011 | 1.588252 | 0.779744 |
| 6  | Austria    | 2012 | 1.601134 | 0.789644 |
| 7  | Austria    | 2013 | 1.61478  | 0.803998 |
| 8  | Austria    | 2014 | 1.618171 | 0.816704 |
| 9  | Austria    | 2015 | 1.585412 | 0.805686 |
| 10 | Austria    | 2016 | 1.587994 | 0.814803 |
| 11 | Austria    | 2017 | 1.567843 | 0.81588  |
| 12 | Austria    | 2018 | 1.545369 | 0.82056  |
| 13 | Austria    | 2019 | 1.510565 | 0.817641 |
| 14 | Azerbaijan | 1990 | 0.884919 | 0.65096  |
| 15 | Azerbaijan | 1991 | 0.863564 | 0.647523 |
| 16 | Azerbaijan | 1992 | 0.804415 | 0.631196 |
| 17 | Azerbaijan | 1993 | 0.807115 | 0.640708 |
| 18 | Azerbaijan | 1994 | 0.824097 | 0.657869 |
| 19 | Azerbaijan | 1995 | 0.899597 | 0.689805 |
| 20 | Azerbaijan | 1996 | 0.926688 | 0.699384 |
| 21 | Azerbaijan | 1997 | 0.933708 | 0.708992 |
| 22 | Azerbaijan | 1998 | 0.951881 | 0.72596  |
| 23 | Azerbaijan | 1999 | 0.959192 | 0.7351   |
| 24 | Azerbaijan | 2000 | 0.953873 | 0.735509 |
| 25 | Azerbaijan | 2001 | 0.94505  | 0.732781 |
| 26 | Azerbaijan | 2002 | 0.929063 | 0.726587 |
| 27 | Azerbaijan | 2003 | 0.922196 | 0.729547 |
| 28 | Azerbaijan | 2004 | 0.911869 | 0.736815 |
| 29 | Azerbaijan | 2005 | 0.903185 | 0.741571 |
| 30 |            |      |          |          |
| 31 |            |      |          |          |
| 32 |            |      |          |          |
| 33 |            |      |          |          |
| 34 |            |      |          |          |
| 35 |            |      |          |          |
| 36 |            |      |          |          |
| 37 |            |      |          |          |
| 38 |            |      |          |          |
| 39 |            |      |          |          |
| 40 |            |      |          |          |
| 41 |            |      |          |          |
| 42 |            |      |          |          |
| 43 |            |      |          |          |
| 44 |            |      |          |          |
| 45 |            |      |          |          |
| 46 |            |      |          |          |

|            |      |          |          |
|------------|------|----------|----------|
| Azerbaijan | 2006 | 0.897948 | 0.739822 |
| Azerbaijan | 2007 | 0.893294 | 0.736339 |
| Azerbaijan | 2008 | 0.88655  | 0.739216 |
| Azerbaijan | 2009 | 0.895969 | 0.749957 |
| Azerbaijan | 2010 | 0.897182 | 0.756723 |
| Azerbaijan | 2011 | 0.886579 | 0.749297 |
| Azerbaijan | 2012 | 0.889392 | 0.748078 |
| Azerbaijan | 2013 | 0.896214 | 0.759684 |
| Azerbaijan | 2014 | 0.915751 | 0.771163 |
| Azerbaijan | 2015 | 0.928454 | 0.781904 |
| Azerbaijan | 2016 | 0.941756 | 0.786452 |
| Azerbaijan | 2017 | 0.948794 | 0.792003 |
| Azerbaijan | 2018 | 0.959219 | 0.807247 |
| Azerbaijan | 2019 | 0.964069 | 0.81359  |
| Bahamas    | 1990 | 0.86923  | 0.637024 |
| Bahamas    | 1991 | 0.873246 | 0.641249 |
| Bahamas    | 1992 | 0.886863 | 0.654543 |
| Bahamas    | 1993 | 0.874838 | 0.651853 |
| Bahamas    | 1994 | 0.865065 | 0.646329 |
| Bahamas    | 1995 | 0.858317 | 0.644723 |
| Bahamas    | 1996 | 0.882475 | 0.662296 |
| Bahamas    | 1997 | 0.890227 | 0.668356 |
| Bahamas    | 1998 | 0.896911 | 0.667434 |
| Bahamas    | 1999 | 0.913152 | 0.670192 |
| Bahamas    | 2000 | 0.946792 | 0.688855 |

|         |      |          |          |
|---------|------|----------|----------|
| Bahamas | 2001 | 0.933287 | 0.683256 |
| Bahamas | 2002 | 0.961431 | 0.708425 |
| Bahamas | 2003 | 0.980276 | 0.723078 |
| Bahamas | 2004 | 0.969473 | 0.729096 |
| Bahamas | 2005 | 0.976416 | 0.747939 |
| Bahamas | 2006 | 0.965569 | 0.746845 |
| Bahamas | 2007 | 0.959604 | 0.750593 |
| Bahamas | 2008 | 0.937636 | 0.735607 |
| Bahamas | 2009 | 0.95849  | 0.756095 |
| Bahamas | 2010 | 0.962004 | 0.755122 |
| Bahamas | 2011 | 0.94786  | 0.745734 |
| Bahamas | 2012 | 0.940035 | 0.743227 |
| Bahamas | 2013 | 0.993174 | 0.800607 |
| Bahamas | 2014 | 0.966604 | 0.786467 |
| Bahamas | 2015 | 0.93935  | 0.758471 |
| Bahamas | 2016 | 0.934359 | 0.754261 |
| Bahamas | 2017 | 0.929223 | 0.75145  |
| Bahamas | 2018 | 0.912342 | 0.733095 |
| Bahamas | 2019 | 0.901126 | 0.718165 |
| Bahrain | 1990 | 0.96846  | 1.011246 |
| Bahrain | 1991 | 0.955936 | 0.993367 |
| Bahrain | 1992 | 0.958204 | 1.008735 |
| Bahrain | 1993 | 0.960542 | 1.032361 |
| Bahrain | 1994 | 0.914769 | 0.98154  |
| Bahrain | 1995 | 0.867259 | 0.918159 |

|            |      |          |          |
|------------|------|----------|----------|
| Bahrain    | 1996 | 0.880086 | 0.927939 |
| Bahrain    | 1997 | 0.841479 | 0.867421 |
| Bahrain    | 1998 | 0.897658 | 0.909906 |
| Bahrain    | 1999 | 0.990692 | 1.012986 |
| Bahrain    | 2000 | 0.997978 | 1.079099 |
| Bahrain    | 2001 | 0.962072 | 1.099497 |
| Bahrain    | 2002 | 0.944778 | 1.025992 |
| Bahrain    | 2003 | 0.88681  | 0.932096 |
| Bahrain    | 2004 | 0.893684 | 0.94323  |
| Bahrain    | 2005 | 0.879997 | 0.951966 |
| Bahrain    | 2006 | 0.845168 | 0.936137 |
| Bahrain    | 2007 | 0.816137 | 0.921743 |
| Bahrain    | 2008 | 0.771081 | 0.894059 |
| Bahrain    | 2009 | 0.739982 | 0.877059 |
| Bahrain    | 2010 | 0.703531 | 0.858101 |
| Bahrain    | 2011 | 0.690148 | 0.841018 |
| Bahrain    | 2012 | 0.696111 | 0.81503  |
| Bahrain    | 2013 | 0.724384 | 0.856791 |
| Bahrain    | 2014 | 0.754134 | 0.915374 |
| Bahrain    | 2015 | 0.761763 | 0.942064 |
| Bahrain    | 2016 | 0.781626 | 0.985433 |
| Bahrain    | 2017 | 0.787411 | 1.010453 |
| Bahrain    | 2018 | 0.761454 | 0.999448 |
| Bahrain    | 2019 | 0.75058  | 1.006894 |
| Bangladesh | 1990 | 0.3804   | 0.716382 |

1  
2  
3  
4  
5  
6  
7  
8  
9  
10  
11  
12  
13  
14  
15  
16  
17  
18  
19  
20  
21  
22  
23  
24  
25  
26  
27  
28  
29  
30  
31  
32  
33  
34  
35  
36  
37  
38  
39  
40  
41  
42  
43  
44  
45  
46

|            |      |          |          |
|------------|------|----------|----------|
| Bangladesh | 1991 | 0.375512 | 0.70697  |
| Bangladesh | 1992 | 0.395376 | 0.732929 |
| Bangladesh | 1993 | 0.404917 | 0.739799 |
| Bangladesh | 1994 | 0.4091   | 0.741698 |
| Bangladesh | 1995 | 0.419216 | 0.749634 |
| Bangladesh | 1996 | 0.415382 | 0.737888 |
| Bangladesh | 1997 | 0.41797  | 0.73412  |
| Bangladesh | 1998 | 0.43435  | 0.780599 |
| Bangladesh | 1999 | 0.454088 | 0.839102 |
| Bangladesh | 2000 | 0.453657 | 0.843641 |
| Bangladesh | 2001 | 0.459795 | 0.853859 |
| Bangladesh | 2002 | 0.467849 | 0.862316 |
| Bangladesh | 2003 | 0.464491 | 0.839155 |
| Bangladesh | 2004 | 0.462154 | 0.815733 |
| Bangladesh | 2005 | 0.466528 | 0.798544 |
| Bangladesh | 2006 | 0.46469  | 0.773923 |
| Bangladesh | 2007 | 0.454664 | 0.734806 |
| Bangladesh | 2008 | 0.464322 | 0.733483 |
| Bangladesh | 2009 | 0.490683 | 0.758337 |
| Bangladesh | 2010 | 0.52175  | 0.778736 |
| Bangladesh | 2011 | 0.542118 | 0.797312 |
| Bangladesh | 2012 | 0.565715 | 0.822096 |
| Bangladesh | 2013 | 0.586354 | 0.836184 |
| Bangladesh | 2014 | 0.60748  | 0.848881 |
| Bangladesh | 2015 | 0.637512 | 0.868537 |

|    |            |      |          |          |
|----|------------|------|----------|----------|
| 1  |            |      |          |          |
| 2  |            |      |          |          |
| 3  |            |      |          |          |
| 4  |            |      |          |          |
| 5  | Bangladesh | 2016 | 0.660278 | 0.882671 |
| 6  | Bangladesh | 2017 | 0.678338 | 0.88952  |
| 7  | Bangladesh | 2018 | 0.698971 | 0.899008 |
| 8  | Bangladesh | 2019 | 0.718894 | 0.907048 |
| 9  | Barbados   | 1990 | 0.894527 | 0.616642 |
| 10 | Barbados   | 1991 | 0.905157 | 0.626068 |
| 11 | Barbados   | 1992 | 0.886093 | 0.614058 |
| 12 | Barbados   | 1993 | 0.840365 | 0.584046 |
| 13 | Barbados   | 1994 | 0.798121 | 0.552412 |
| 14 | Barbados   | 1995 | 0.797847 | 0.547842 |
| 15 | Barbados   | 1996 | 0.802923 | 0.548148 |
| 16 | Barbados   | 1997 | 0.829481 | 0.563764 |
| 17 | Barbados   | 1998 | 0.91285  | 0.619466 |
| 18 | Barbados   | 1999 | 1.051021 | 0.713134 |
| 19 | Barbados   | 2000 | 1.129813 | 0.771219 |
| 20 | Barbados   | 2001 | 1.164329 | 0.804694 |
| 21 | Barbados   | 2002 | 1.098412 | 0.766947 |
| 22 | Barbados   | 2003 | 1.060014 | 0.743981 |
| 23 | Barbados   | 2004 | 1.049906 | 0.73631  |
| 24 | Barbados   | 2005 | 1.035049 | 0.730984 |
| 25 | Barbados   | 2006 | 1.025381 | 0.726048 |
| 26 | Barbados   | 2007 | 1.03494  | 0.730463 |
| 27 | Barbados   | 2008 | 1.071119 | 0.755906 |
| 28 | Barbados   | 2009 | 1.186422 | 0.840113 |
| 29 | Barbados   | 2010 | 1.20559  | 0.861409 |
| 30 |            |      |          |          |
| 31 |            |      |          |          |
| 32 |            |      |          |          |
| 33 |            |      |          |          |
| 34 |            |      |          |          |
| 35 |            |      |          |          |
| 36 |            |      |          |          |
| 37 |            |      |          |          |
| 38 |            |      |          |          |
| 39 |            |      |          |          |
| 40 |            |      |          |          |
| 41 |            |      |          |          |
| 42 |            |      |          |          |
| 43 |            |      |          |          |
| 44 |            |      |          |          |
| 45 |            |      |          |          |
| 46 |            |      |          |          |

|    |          |      |          |          |
|----|----------|------|----------|----------|
| 1  |          |      |          |          |
| 2  |          |      |          |          |
| 3  |          |      |          |          |
| 4  |          |      |          |          |
| 5  | Barbados | 2011 | 1.256207 | 0.903078 |
| 6  | Barbados | 2012 | 1.232002 | 0.894855 |
| 7  | Barbados | 2013 | 1.244512 | 0.910245 |
| 8  | Barbados | 2014 | 1.226329 | 0.90563  |
| 9  | Barbados | 2015 | 1.219095 | 0.909021 |
| 10 | Barbados | 2016 | 1.20731  | 0.908776 |
| 11 | Barbados | 2017 | 1.18224  | 0.898411 |
| 12 | Barbados | 2018 | 1.136632 | 0.87408  |
| 13 | Barbados | 2019 | 1.057898 | 0.823784 |
| 14 | Belarus  | 1990 | 1.222737 | 0.546785 |
| 15 | Belarus  | 1991 | 1.222589 | 0.542306 |
| 16 | Belarus  | 1992 | 1.222354 | 0.541995 |
| 17 | Belarus  | 1993 | 1.194195 | 0.528192 |
| 18 | Belarus  | 1994 | 1.198027 | 0.525786 |
| 19 | Belarus  | 1995 | 1.190682 | 0.524236 |
| 20 | Belarus  | 1996 | 1.19779  | 0.529672 |
| 21 | Belarus  | 1997 | 1.201862 | 0.530403 |
| 22 | Belarus  | 1998 | 1.180566 | 0.522256 |
| 23 | Belarus  | 1999 | 1.17349  | 0.525554 |
| 24 | Belarus  | 2000 | 1.181038 | 0.537008 |
| 25 | Belarus  | 2001 | 1.11243  | 0.527535 |
| 26 | Belarus  | 2002 | 0.992516 | 0.514932 |
| 27 | Belarus  | 2003 | 0.965662 | 0.512927 |
| 28 | Belarus  | 2004 | 0.987739 | 0.51748  |
| 29 | Belarus  | 2005 | 0.949344 | 0.490265 |
| 30 |          |      |          |          |
| 31 |          |      |          |          |
| 32 |          |      |          |          |
| 33 |          |      |          |          |
| 34 |          |      |          |          |
| 35 |          |      |          |          |
| 36 |          |      |          |          |
| 37 |          |      |          |          |
| 38 |          |      |          |          |
| 39 |          |      |          |          |
| 40 |          |      |          |          |
| 41 |          |      |          |          |
| 42 |          |      |          |          |
| 43 |          |      |          |          |
| 44 |          |      |          |          |
| 45 |          |      |          |          |
| 46 |          |      |          |          |

|    |         |      |          |          |
|----|---------|------|----------|----------|
| 1  |         |      |          |          |
| 2  |         |      |          |          |
| 3  |         |      |          |          |
| 4  |         |      |          |          |
| 5  | Belarus | 2006 | 0.967082 | 0.492058 |
| 6  | Belarus | 2007 | 1.016222 | 0.523081 |
| 7  | Belarus | 2008 | 0.997675 | 0.511675 |
| 8  | Belarus | 2009 | 1.034343 | 0.52553  |
| 9  | Belarus | 2010 | 1.035253 | 0.522242 |
| 10 | Belarus | 2011 | 1.052963 | 0.526143 |
| 11 | Belarus | 2012 | 1.118591 | 0.540565 |
| 12 | Belarus | 2013 | 1.163733 | 0.552405 |
| 13 | Belarus | 2014 | 1.170396 | 0.54707  |
| 14 | Belarus | 2015 | 1.17895  | 0.546572 |
| 15 | Belarus | 2016 | 1.200354 | 0.553718 |
| 16 | Belarus | 2017 | 1.181    | 0.545909 |
| 17 | Belarus | 2018 | 1.181577 | 0.547002 |
| 18 | Belarus | 2019 | 1.173258 | 0.544368 |
| 19 | Belgium | 1990 | 1.421385 | 0.740877 |
| 20 | Belgium | 1991 | 1.423942 | 0.735281 |
| 21 | Belgium | 1992 | 1.445789 | 0.734188 |
| 22 | Belgium | 1993 | 1.462333 | 0.731138 |
| 23 | Belgium | 1994 | 1.49978  | 0.74798  |
| 24 | Belgium | 1995 | 1.496972 | 0.743446 |
| 25 | Belgium | 1996 | 1.496832 | 0.734692 |
| 26 | Belgium | 1997 | 1.509634 | 0.737004 |
| 27 | Belgium | 1998 | 1.514908 | 0.74002  |
| 28 | Belgium | 1999 | 1.502728 | 0.733028 |
| 29 | Belgium | 2000 | 1.557667 | 0.760407 |
| 30 |         |      |          |          |
| 31 |         |      |          |          |
| 32 |         |      |          |          |
| 33 |         |      |          |          |
| 34 |         |      |          |          |
| 35 |         |      |          |          |
| 36 |         |      |          |          |
| 37 |         |      |          |          |
| 38 |         |      |          |          |
| 39 |         |      |          |          |
| 40 |         |      |          |          |
| 41 |         |      |          |          |
| 42 |         |      |          |          |
| 43 |         |      |          |          |
| 44 |         |      |          |          |
| 45 |         |      |          |          |
| 46 |         |      |          |          |



1  
2  
3  
4  
5  
6  
7  
8  
9  
10  
11  
12  
13  
14  
15  
16  
17  
18  
19  
20  
21  
22  
23  
24  
25  
26  
27  
28  
29  
30  
31  
32  
33  
34  
35  
36  
37  
38  
39  
40  
41  
42  
43  
44  
45  
46

|         |      |          |          |
|---------|------|----------|----------|
| Belgium | 2001 | 1.583938 | 0.775911 |
| Belgium | 2002 | 1.586992 | 0.779042 |
| Belgium | 2003 | 1.581673 | 0.780405 |
| Belgium | 2004 | 1.568962 | 0.781184 |
| Belgium | 2005 | 1.5535   | 0.78059  |
| Belgium | 2006 | 1.536952 | 0.778674 |
| Belgium | 2007 | 1.518508 | 0.773984 |
| Belgium | 2008 | 1.485609 | 0.766927 |
| Belgium | 2009 | 1.472726 | 0.767742 |
| Belgium | 2010 | 1.455233 | 0.765906 |
| Belgium | 2011 | 1.438783 | 0.760722 |
| Belgium | 2012 | 1.407827 | 0.747317 |
| Belgium | 2013 | 1.420968 | 0.757718 |
| Belgium | 2014 | 1.426814 | 0.762059 |
| Belgium | 2015 | 1.453753 | 0.777867 |
| Belgium | 2016 | 1.443727 | 0.774551 |
| Belgium | 2017 | 1.418192 | 0.768017 |
| Belgium | 2018 | 1.412215 | 0.771966 |
| Belgium | 2019 | 1.395084 | 0.770581 |
| Belize  | 1990 | 1.00662  | 0.972825 |
| Belize  | 1991 | 0.965362 | 0.94683  |
| Belize  | 1992 | 0.931144 | 0.91186  |
| Belize  | 1993 | 0.932714 | 0.918929 |
| Belize  | 1994 | 0.931709 | 0.919944 |
| Belize  | 1995 | 0.88969  | 0.890978 |

|    |        |      |          |          |
|----|--------|------|----------|----------|
| 1  |        |      |          |          |
| 2  |        |      |          |          |
| 3  |        |      |          |          |
| 4  |        |      |          |          |
| 5  | Belize | 1996 | 0.867909 | 0.868761 |
| 6  | Belize | 1997 | 0.814316 | 0.808436 |
| 7  | Belize | 1998 | 0.749212 | 0.736919 |
| 8  | Belize | 1999 | 0.714264 | 0.689447 |
| 9  | Belize | 2000 | 0.743064 | 0.711691 |
| 10 | Belize | 2001 | 0.79908  | 0.763506 |
| 11 | Belize | 2002 | 0.851249 | 0.81938  |
| 12 | Belize | 2003 | 0.884077 | 0.854598 |
| 13 | Belize | 2004 | 0.886352 | 0.861362 |
| 14 | Belize | 2005 | 0.904799 | 0.880318 |
| 15 | Belize | 2006 | 0.936253 | 0.920596 |
| 16 | Belize | 2007 | 0.939889 | 0.93118  |
| 17 | Belize | 2008 | 0.921785 | 0.919071 |
| 18 | Belize | 2009 | 0.920857 | 0.923895 |
| 19 | Belize | 2010 | 0.915009 | 0.919982 |
| 20 | Belize | 2011 | 0.925972 | 0.936544 |
| 21 | Belize | 2012 | 0.928028 | 0.938017 |
| 22 | Belize | 2013 | 0.940011 | 0.951449 |
| 23 | Belize | 2014 | 0.926192 | 0.934737 |
| 24 | Belize | 2015 | 0.870335 | 0.87185  |
| 25 | Belize | 2016 | 0.849205 | 0.852208 |
| 26 | Belize | 2017 | 0.845053 | 0.848611 |
| 27 | Belize | 2018 | 0.837958 | 0.836727 |
| 28 | Belize | 2019 | 0.830969 | 0.825455 |
| 29 | Benin  | 1990 | 0.79431  | 0.718407 |
| 30 |        |      |          |          |
| 31 |        |      |          |          |
| 32 |        |      |          |          |
| 33 |        |      |          |          |
| 34 |        |      |          |          |
| 35 |        |      |          |          |
| 36 |        |      |          |          |
| 37 |        |      |          |          |
| 38 |        |      |          |          |
| 39 |        |      |          |          |
| 40 |        |      |          |          |
| 41 |        |      |          |          |
| 42 |        |      |          |          |
| 43 |        |      |          |          |
| 44 |        |      |          |          |
| 45 |        |      |          |          |
| 46 |        |      |          |          |

|    |       |      |          |          |
|----|-------|------|----------|----------|
| 1  |       |      |          |          |
| 2  |       |      |          |          |
| 3  |       |      |          |          |
| 4  |       |      |          |          |
| 5  | Benin | 1991 | 0.787919 | 0.71165  |
| 6  | Benin | 1992 | 0.789963 | 0.712579 |
| 7  | Benin | 1993 | 0.792025 | 0.710205 |
| 8  | Benin | 1994 | 0.794905 | 0.70809  |
| 9  | Benin | 1995 | 0.79705  | 0.707537 |
| 10 | Benin | 1996 | 0.797238 | 0.702469 |
| 11 | Benin | 1997 | 0.79723  | 0.69874  |
| 12 | Benin | 1998 | 0.792817 | 0.690638 |
| 13 | Benin | 1999 | 0.787169 | 0.680281 |
| 14 | Benin | 2000 | 0.789476 | 0.67662  |
| 15 | Benin | 2001 | 0.791888 | 0.674468 |
| 16 | Benin | 2002 | 0.795861 | 0.672453 |
| 17 | Benin | 2003 | 0.805334 | 0.676195 |
| 18 | Benin | 2004 | 0.820154 | 0.684018 |
| 19 | Benin | 2005 | 0.837154 | 0.694794 |
| 20 | Benin | 2006 | 0.854647 | 0.70472  |
| 21 | Benin | 2007 | 0.870698 | 0.715176 |
| 22 | Benin | 2008 | 0.864989 | 0.708258 |
| 23 | Benin | 2009 | 0.861007 | 0.704984 |
| 24 | Benin | 2010 | 0.856749 | 0.700102 |
| 25 | Benin | 2011 | 0.848411 | 0.694153 |
| 26 | Benin | 2012 | 0.842619 | 0.6896   |
| 27 | Benin | 2013 | 0.831281 | 0.682766 |
| 28 | Benin | 2014 | 0.834141 | 0.686071 |
| 29 | Benin | 2015 | 0.836716 | 0.687831 |
| 30 |       |      |          |          |
| 31 |       |      |          |          |
| 32 |       |      |          |          |
| 33 |       |      |          |          |
| 34 |       |      |          |          |
| 35 |       |      |          |          |
| 36 |       |      |          |          |
| 37 |       |      |          |          |
| 38 |       |      |          |          |
| 39 |       |      |          |          |
| 40 |       |      |          |          |
| 41 |       |      |          |          |
| 42 |       |      |          |          |
| 43 |       |      |          |          |
| 44 |       |      |          |          |
| 45 |       |      |          |          |
| 46 |       |      |          |          |

|    |         |      |          |          |
|----|---------|------|----------|----------|
| 1  |         |      |          |          |
| 2  |         |      |          |          |
| 3  |         |      |          |          |
| 4  |         |      |          |          |
| 5  | Benin   | 2016 | 0.841937 | 0.693924 |
| 6  | Benin   | 2017 | 0.845774 | 0.698568 |
| 7  | Benin   | 2018 | 0.84839  | 0.702366 |
| 8  | Benin   | 2019 | 0.84808  | 0.705069 |
| 9  |         |      |          |          |
| 10 | Bermuda | 1990 | 0.754029 | 0.536264 |
| 11 | Bermuda | 1991 | 0.779454 | 0.553886 |
| 12 | Bermuda | 1992 | 0.840547 | 0.599338 |
| 13 | Bermuda | 1993 | 0.854096 | 0.607478 |
| 14 | Bermuda | 1994 | 0.872814 | 0.618957 |
| 15 | Bermuda | 1995 | 0.898129 | 0.634928 |
| 16 | Bermuda | 1996 | 0.888039 | 0.626096 |
| 17 | Bermuda | 1997 | 0.889982 | 0.625837 |
| 18 | Bermuda | 1998 | 0.898389 | 0.629455 |
| 19 | Bermuda | 1999 | 0.901327 | 0.628074 |
| 20 | Bermuda | 2000 | 0.917436 | 0.635426 |
| 21 | Bermuda | 2001 | 0.930333 | 0.644094 |
| 22 | Bermuda | 2002 | 0.916068 | 0.634163 |
| 23 | Bermuda | 2003 | 0.872629 | 0.604624 |
| 24 | Bermuda | 2004 | 0.847269 | 0.587719 |
| 25 | Bermuda | 2005 | 0.818464 | 0.567361 |
| 26 | Bermuda | 2006 | 0.787899 | 0.546584 |
| 27 | Bermuda | 2007 | 0.77141  | 0.533994 |
| 28 | Bermuda | 2008 | 0.766299 | 0.528829 |
| 29 | Bermuda | 2009 | 0.771124 | 0.5311   |
| 30 | Bermuda | 2010 | 0.759957 | 0.523274 |
| 31 |         |      |          |          |
| 32 |         |      |          |          |
| 33 |         |      |          |          |
| 34 |         |      |          |          |
| 35 |         |      |          |          |
| 36 |         |      |          |          |
| 37 |         |      |          |          |
| 38 |         |      |          |          |
| 39 |         |      |          |          |
| 40 |         |      |          |          |
| 41 |         |      |          |          |
| 42 |         |      |          |          |
| 43 |         |      |          |          |
| 44 |         |      |          |          |
| 45 |         |      |          |          |
| 46 |         |      |          |          |

1  
2  
3  
4  
5  
6  
7  
8  
9  
10  
11  
12  
13  
14  
15  
16  
17  
18  
19  
20  
21  
22  
23  
24  
25  
26  
27  
28  
29  
30  
31  
32  
33  
34  
35  
36  
37  
38  
39  
40  
41  
42  
43  
44  
45  
46

|         |      |          |          |
|---------|------|----------|----------|
| Bermuda | 2011 | 0.75285  | 0.518281 |
| Bermuda | 2012 | 0.746253 | 0.51245  |
| Bermuda | 2013 | 0.749626 | 0.513518 |
| Bermuda | 2014 | 0.757856 | 0.518891 |
| Bermuda | 2015 | 0.769205 | 0.52558  |
| Bermuda | 2016 | 0.777422 | 0.531834 |
| Bermuda | 2017 | 0.777963 | 0.532703 |
| Bermuda | 2018 | 0.776396 | 0.531267 |
| Bermuda | 2019 | 0.774579 | 0.529411 |
| Bhutan  | 1990 | 1.150997 | 0.961563 |
| Bhutan  | 1991 | 1.159768 | 0.976396 |
| Bhutan  | 1992 | 1.161489 | 0.988481 |
| Bhutan  | 1993 | 1.162582 | 1.002648 |
| Bhutan  | 1994 | 1.16165  | 1.015731 |
| Bhutan  | 1995 | 1.161533 | 1.029975 |
| Bhutan  | 1996 | 1.155882 | 1.038013 |
| Bhutan  | 1997 | 1.14839  | 1.044638 |
| Bhutan  | 1998 | 1.132276 | 1.043871 |
| Bhutan  | 1999 | 1.117843 | 1.044833 |
| Bhutan  | 2000 | 1.104612 | 1.044609 |
| Bhutan  | 2001 | 1.082835 | 1.036621 |
| Bhutan  | 2002 | 1.060601 | 1.028499 |
| Bhutan  | 2003 | 1.048045 | 1.026816 |
| Bhutan  | 2004 | 1.048342 | 1.036155 |
| Bhutan  | 2005 | 1.045514 | 1.041306 |

|                                  |      |          |          |
|----------------------------------|------|----------|----------|
| Bhutan                           | 2006 | 1.040212 | 1.045284 |
| Bhutan                           | 2007 | 1.04562  | 1.054329 |
| Bhutan                           | 2008 | 1.020866 | 1.035328 |
| Bhutan                           | 2009 | 0.990419 | 1.00997  |
| Bhutan                           | 2010 | 0.976659 | 0.999512 |
| Bhutan                           | 2011 | 0.963328 | 0.988538 |
| Bhutan                           | 2012 | 0.954794 | 0.981532 |
| Bhutan                           | 2013 | 0.951871 | 0.978607 |
| Bhutan                           | 2014 | 0.951886 | 0.977927 |
| Bhutan                           | 2015 | 0.944963 | 0.969948 |
| Bhutan                           | 2016 | 0.93875  | 0.962066 |
| Bhutan                           | 2017 | 0.941255 | 0.962716 |
| Bhutan                           | 2018 | 0.945337 | 0.964172 |
| Bhutan                           | 2019 | 0.95056  | 0.966948 |
| Bolivia (Plurinational State of) | 1990 | 0.961256 | 0.803475 |
| Bolivia (Plurinational State of) | 1991 | 0.974811 | 0.817495 |
| Bolivia (Plurinational State of) | 1992 | 1.002636 | 0.843273 |
| Bolivia (Plurinational State of) | 1993 | 1.017767 | 0.858119 |
| Bolivia (Plurinational State of) | 1994 | 1.033256 | 0.87403  |
| Bolivia (Plurinational State of) | 1995 | 1.024883 | 0.870068 |
| Bolivia (Plurinational State of) | 1996 | 1.017566 | 0.866427 |
| Bolivia (Plurinational State of) | 1997 | 1.007971 | 0.861273 |
| Bolivia (Plurinational State of) | 1998 | 0.984129 | 0.841985 |
| Bolivia (Plurinational State of) | 1999 | 0.966015 | 0.827632 |
| Bolivia (Plurinational State of) | 2000 | 0.962713 | 0.824518 |

1  
2  
3  
4  
5  
6  
7  
8  
9  
10  
11  
12  
13  
14  
15  
16  
17  
18  
19  
20  
21  
22  
23  
24  
25  
26  
27  
28  
29  
30  
31  
32  
33  
34  
35  
36  
37  
38  
39  
40  
41  
42  
43  
44  
45  
46

|                                  |      |          |          |
|----------------------------------|------|----------|----------|
| Bolivia (Plurinational State of) | 2001 | 0.958932 | 0.820473 |
| Bolivia (Plurinational State of) | 2002 | 0.976256 | 0.835383 |
| Bolivia (Plurinational State of) | 2003 | 0.98302  | 0.842998 |
| Bolivia (Plurinational State of) | 2004 | 0.994413 | 0.853175 |
| Bolivia (Plurinational State of) | 2005 | 1.000176 | 0.857717 |
| Bolivia (Plurinational State of) | 2006 | 0.994393 | 0.853639 |
| Bolivia (Plurinational State of) | 2007 | 1.012508 | 0.870734 |
| Bolivia (Plurinational State of) | 2008 | 1.012945 | 0.872046 |
| Bolivia (Plurinational State of) | 2009 | 1.014013 | 0.874569 |
| Bolivia (Plurinational State of) | 2010 | 1.020693 | 0.882007 |
| Bolivia (Plurinational State of) | 2011 | 1.0303   | 0.892378 |
| Bolivia (Plurinational State of) | 2012 | 1.042369 | 0.905194 |
| Bolivia (Plurinational State of) | 2013 | 1.032939 | 0.899283 |
| Bolivia (Plurinational State of) | 2014 | 1.009051 | 0.880472 |
| Bolivia (Plurinational State of) | 2015 | 1.012061 | 0.885248 |
| Bolivia (Plurinational State of) | 2016 | 1.029472 | 0.902983 |
| Bolivia (Plurinational State of) | 2017 | 1.025379 | 0.901278 |
| Bolivia (Plurinational State of) | 2018 | 1.020638 | 0.898737 |
| Bolivia (Plurinational State of) | 2019 | 1.018462 | 0.897773 |
| Bosnia and Herzegovina           | 1990 | 1.29983  | 0.970983 |
| Bosnia and Herzegovina           | 1991 | 1.288569 | 0.978089 |
| Bosnia and Herzegovina           | 1992 | 1.355309 | 1.027289 |
| Bosnia and Herzegovina           | 1993 | 1.329285 | 0.98292  |
| Bosnia and Herzegovina           | 1994 | 1.34116  | 0.988002 |
| Bosnia and Herzegovina           | 1995 | 1.337425 | 0.976078 |

|                        |      |          |          |
|------------------------|------|----------|----------|
| Bosnia and Herzegovina | 1996 | 1.330841 | 0.969336 |
| Bosnia and Herzegovina | 1997 | 1.386711 | 1.048084 |
| Bosnia and Herzegovina | 1998 | 1.325447 | 0.989462 |
| Bosnia and Herzegovina | 1999 | 1.299408 | 0.931218 |
| Bosnia and Herzegovina | 2000 | 1.218634 | 0.856607 |
| Bosnia and Herzegovina | 2001 | 1.246342 | 0.884627 |
| Bosnia and Herzegovina | 2002 | 1.214282 | 0.851942 |
| Bosnia and Herzegovina | 2003 | 1.13905  | 0.783318 |
| Bosnia and Herzegovina | 2004 | 1.143951 | 0.790536 |
| Bosnia and Herzegovina | 2005 | 1.040577 | 0.726236 |
| Bosnia and Herzegovina | 2006 | 1.06114  | 0.738709 |
| Bosnia and Herzegovina | 2007 | 1.0373   | 0.726447 |
| Bosnia and Herzegovina | 2008 | 1.018065 | 0.713553 |
| Bosnia and Herzegovina | 2009 | 1.009822 | 0.716932 |
| Bosnia and Herzegovina | 2010 | 1.0141   | 0.719194 |
| Bosnia and Herzegovina | 2011 | 0.981583 | 0.69969  |
| Bosnia and Herzegovina | 2012 | 1.005197 | 0.710447 |
| Bosnia and Herzegovina | 2013 | 1.013019 | 0.708952 |
| Bosnia and Herzegovina | 2014 | 1.038881 | 0.725823 |
| Bosnia and Herzegovina | 2015 | 1.049397 | 0.736441 |
| Bosnia and Herzegovina | 2016 | 1.040546 | 0.735288 |
| Bosnia and Herzegovina | 2017 | 1.040503 | 0.737686 |
| Bosnia and Herzegovina | 2018 | 1.04249  | 0.738539 |
| Bosnia and Herzegovina | 2019 | 1.043485 | 0.74054  |
| Botswana               | 1990 | 0.537137 | 0.414065 |



1  
2  
3  
4  
5  
6  
7  
8  
9  
10  
11  
12  
13  
14  
15  
16  
17  
18  
19  
20  
21  
22  
23  
24  
25  
26  
27  
28  
29  
30  
31  
32  
33  
34  
35  
36  
37  
38  
39  
40  
41  
42  
43  
44  
45  
46

|          |      |          |          |
|----------|------|----------|----------|
| Botswana | 1991 | 0.529932 | 0.411447 |
| Botswana | 1992 | 0.518595 | 0.406089 |
| Botswana | 1993 | 0.500924 | 0.397237 |
| Botswana | 1994 | 0.475532 | 0.382303 |
| Botswana | 1995 | 0.445387 | 0.362409 |
| Botswana | 1996 | 0.411066 | 0.337684 |
| Botswana | 1997 | 0.38692  | 0.317997 |
| Botswana | 1998 | 0.388996 | 0.316316 |
| Botswana | 1999 | 0.399472 | 0.320642 |
| Botswana | 2000 | 0.419352 | 0.331758 |
| Botswana | 2001 | 0.440807 | 0.343843 |
| Botswana | 2002 | 0.462907 | 0.35598  |
| Botswana | 2003 | 0.48127  | 0.365153 |
| Botswana | 2004 | 0.485173 | 0.364081 |
| Botswana | 2005 | 0.486513 | 0.361465 |
| Botswana | 2006 | 0.486971 | 0.359767 |
| Botswana | 2007 | 0.517909 | 0.376773 |
| Botswana | 2008 | 0.56281  | 0.404718 |
| Botswana | 2009 | 0.590041 | 0.421971 |
| Botswana | 2010 | 0.61666  | 0.43976  |
| Botswana | 2011 | 0.650044 | 0.462337 |
| Botswana | 2012 | 0.673408 | 0.478454 |
| Botswana | 2013 | 0.698869 | 0.496157 |
| Botswana | 2014 | 0.729034 | 0.517204 |
| Botswana | 2015 | 0.736907 | 0.525176 |

|    |          |      |          |          |
|----|----------|------|----------|----------|
| 1  |          |      |          |          |
| 2  |          |      |          |          |
| 3  |          |      |          |          |
| 4  |          |      |          |          |
| 5  | Botswana | 2016 | 0.736744 | 0.527736 |
| 6  | Botswana | 2017 | 0.741796 | 0.534897 |
| 7  | Botswana | 2018 | 0.745507 | 0.541574 |
| 8  | Botswana | 2019 | 0.749048 | 0.547359 |
| 9  |          |      |          |          |
| 10 | Brazil   | 1990 | 0.868292 | 0.734531 |
| 11 | Brazil   | 1991 | 0.871669 | 0.733028 |
| 12 | Brazil   | 1992 | 0.873059 | 0.730412 |
| 13 | Brazil   | 1993 | 0.870166 | 0.724411 |
| 14 | Brazil   | 1994 | 0.872946 | 0.725148 |
| 15 | Brazil   | 1995 | 0.888112 | 0.736283 |
| 16 | Brazil   | 1996 | 0.901793 | 0.748348 |
| 17 | Brazil   | 1997 | 0.912694 | 0.754577 |
| 18 | Brazil   | 1998 | 0.915702 | 0.754223 |
| 19 | Brazil   | 1999 | 0.920762 | 0.755906 |
| 20 | Brazil   | 2000 | 0.923142 | 0.754715 |
| 21 | Brazil   | 2001 | 0.92368  | 0.75192  |
| 22 | Brazil   | 2002 | 0.926329 | 0.749707 |
| 23 | Brazil   | 2003 | 0.914675 | 0.736203 |
| 24 | Brazil   | 2004 | 0.908924 | 0.728108 |
| 25 | Brazil   | 2005 | 0.909099 | 0.725899 |
| 26 | Brazil   | 2006 | 0.914362 | 0.726873 |
| 27 | Brazil   | 2007 | 0.917005 | 0.725326 |
| 28 | Brazil   | 2008 | 0.919568 | 0.724005 |
| 29 | Brazil   | 2009 | 0.926131 | 0.725645 |
| 30 | Brazil   | 2010 | 0.929564 | 0.724421 |
| 31 |          |      |          |          |
| 32 |          |      |          |          |
| 33 |          |      |          |          |
| 34 |          |      |          |          |
| 35 |          |      |          |          |
| 36 |          |      |          |          |
| 37 |          |      |          |          |
| 38 |          |      |          |          |
| 39 |          |      |          |          |
| 40 |          |      |          |          |
| 41 |          |      |          |          |
| 42 |          |      |          |          |
| 43 |          |      |          |          |
| 44 |          |      |          |          |
| 45 |          |      |          |          |
| 46 |          |      |          |          |

|                   |      |          |          |
|-------------------|------|----------|----------|
| Brazil            | 2011 | 0.929337 | 0.72113  |
| Brazil            | 2012 | 0.932485 | 0.720529 |
| Brazil            | 2013 | 0.929513 | 0.715356 |
| Brazil            | 2014 | 0.928064 | 0.711744 |
| Brazil            | 2015 | 0.93     | 0.710368 |
| Brazil            | 2016 | 0.921374 | 0.701534 |
| Brazil            | 2017 | 0.923842 | 0.701841 |
| Brazil            | 2018 | 0.931119 | 0.708035 |
| Brazil            | 2019 | 0.926425 | 0.704651 |
| Brunei Darussalam | 1990 | 0.730035 | 0.53404  |
| Brunei Darussalam | 1991 | 0.74702  | 0.551392 |
| Brunei Darussalam | 1992 | 0.753832 | 0.561922 |
| Brunei Darussalam | 1993 | 0.761973 | 0.573017 |
| Brunei Darussalam | 1994 | 0.802694 | 0.622696 |
| Brunei Darussalam | 1995 | 0.817759 | 0.648665 |
| Brunei Darussalam | 1996 | 0.850126 | 0.700386 |
| Brunei Darussalam | 1997 | 0.894011 | 0.778129 |
| Brunei Darussalam | 1998 | 0.873648 | 0.765259 |
| Brunei Darussalam | 1999 | 0.871369 | 0.763791 |
| Brunei Darussalam | 2000 | 0.894188 | 0.798016 |
| Brunei Darussalam | 2001 | 0.90963  | 0.83227  |
| Brunei Darussalam | 2002 | 0.886411 | 0.780404 |
| Brunei Darussalam | 2003 | 0.854292 | 0.71243  |
| Brunei Darussalam | 2004 | 0.859174 | 0.715514 |
| Brunei Darussalam | 2005 | 0.84762  | 0.690099 |

|    |                   |      |          |          |
|----|-------------------|------|----------|----------|
| 1  |                   |      |          |          |
| 2  |                   |      |          |          |
| 3  |                   |      |          |          |
| 4  |                   |      |          |          |
| 5  | Brunei Darussalam | 2006 | 0.852917 | 0.685786 |
| 6  | Brunei Darussalam | 2007 | 0.882095 | 0.739274 |
| 7  | Brunei Darussalam | 2008 | 0.862392 | 0.697695 |
| 8  | Brunei Darussalam | 2009 | 0.856274 | 0.659067 |
| 9  | Brunei Darussalam | 2010 | 0.855225 | 0.645933 |
| 10 | Brunei Darussalam | 2011 | 0.874377 | 0.639123 |
| 11 | Brunei Darussalam | 2012 | 0.893294 | 0.618207 |
| 12 | Brunei Darussalam | 2013 | 0.887434 | 0.591531 |
| 13 | Brunei Darussalam | 2014 | 0.889551 | 0.570037 |
| 14 | Brunei Darussalam | 2015 | 0.908183 | 0.567185 |
| 15 | Brunei Darussalam | 2016 | 0.908363 | 0.560784 |
| 16 | Brunei Darussalam | 2017 | 0.899665 | 0.555    |
| 17 | Brunei Darussalam | 2018 | 0.897283 | 0.547615 |
| 18 | Brunei Darussalam | 2019 | 0.897071 | 0.549288 |
| 19 | Bulgaria          | 1990 | 0.784462 | 0.633343 |
| 20 | Bulgaria          | 1991 | 0.8026   | 0.650828 |
| 21 | Bulgaria          | 1992 | 0.791893 | 0.644128 |
| 22 | Bulgaria          | 1993 | 0.768757 | 0.619671 |
| 23 | Bulgaria          | 1994 | 0.766644 | 0.616116 |
| 24 | Bulgaria          | 1995 | 0.784155 | 0.626033 |
| 25 | Bulgaria          | 1996 | 0.792337 | 0.62834  |
| 26 | Bulgaria          | 1997 | 0.81624  | 0.64351  |
| 27 | Bulgaria          | 1998 | 0.810752 | 0.633696 |
| 28 | Bulgaria          | 1999 | 0.84948  | 0.659797 |
| 29 | Bulgaria          | 2000 | 0.827353 | 0.634195 |
| 30 |                   |      |          |          |
| 31 |                   |      |          |          |
| 32 |                   |      |          |          |
| 33 |                   |      |          |          |
| 34 |                   |      |          |          |
| 35 |                   |      |          |          |
| 36 |                   |      |          |          |
| 37 |                   |      |          |          |
| 38 |                   |      |          |          |
| 39 |                   |      |          |          |
| 40 |                   |      |          |          |
| 41 |                   |      |          |          |
| 42 |                   |      |          |          |
| 43 |                   |      |          |          |
| 44 |                   |      |          |          |
| 45 |                   |      |          |          |
| 46 |                   |      |          |          |

1  
2  
3  
4  
5  
6  
7  
8  
9  
10  
11  
12  
13  
14  
15  
16  
17  
18  
19  
20  
21  
22  
23  
24  
25  
26  
27  
28  
29  
30  
31  
32  
33  
34  
35  
36  
37  
38  
39  
40  
41  
42  
43  
44  
45  
46

|              |      |          |          |
|--------------|------|----------|----------|
| Bulgaria     | 2001 | 0.799274 | 0.605875 |
| Bulgaria     | 2002 | 0.784054 | 0.590177 |
| Bulgaria     | 2003 | 0.761885 | 0.573417 |
| Bulgaria     | 2004 | 0.750577 | 0.563872 |
| Bulgaria     | 2005 | 0.737531 | 0.550685 |
| Bulgaria     | 2006 | 0.740673 | 0.551365 |
| Bulgaria     | 2007 | 0.742368 | 0.548454 |
| Bulgaria     | 2008 | 0.735157 | 0.539766 |
| Bulgaria     | 2009 | 0.733233 | 0.536161 |
| Bulgaria     | 2010 | 0.744196 | 0.543393 |
| Bulgaria     | 2011 | 0.738048 | 0.535808 |
| Bulgaria     | 2012 | 0.742174 | 0.534777 |
| Bulgaria     | 2013 | 0.748018 | 0.538745 |
| Bulgaria     | 2014 | 0.757692 | 0.54565  |
| Bulgaria     | 2015 | 0.768527 | 0.55158  |
| Bulgaria     | 2016 | 0.751909 | 0.541118 |
| Bulgaria     | 2017 | 0.748123 | 0.537571 |
| Bulgaria     | 2018 | 0.757731 | 0.540935 |
| Bulgaria     | 2019 | 0.759446 | 0.540909 |
| Burkina Faso | 1990 | 0.829528 | 0.714538 |
| Burkina Faso | 1991 | 0.822189 | 0.708491 |
| Burkina Faso | 1992 | 0.828201 | 0.71154  |
| Burkina Faso | 1993 | 0.826131 | 0.708344 |
| Burkina Faso | 1994 | 0.828671 | 0.709142 |
| Burkina Faso | 1995 | 0.832397 | 0.710774 |

|              |      |          |          |
|--------------|------|----------|----------|
| Burkina Faso | 1996 | 0.840602 | 0.718042 |
| Burkina Faso | 1997 | 0.855196 | 0.729615 |
| Burkina Faso | 1998 | 0.864386 | 0.736372 |
| Burkina Faso | 1999 | 0.878543 | 0.745592 |
| Burkina Faso | 2000 | 0.896482 | 0.757597 |
| Burkina Faso | 2001 | 0.900208 | 0.758025 |
| Burkina Faso | 2002 | 0.911224 | 0.761005 |
| Burkina Faso | 2003 | 0.922792 | 0.770118 |
| Burkina Faso | 2004 | 0.93218  | 0.777212 |
| Burkina Faso | 2005 | 0.936739 | 0.780345 |
| Burkina Faso | 2006 | 0.941423 | 0.78412  |
| Burkina Faso | 2007 | 0.937418 | 0.779712 |
| Burkina Faso | 2008 | 0.932447 | 0.771837 |
| Burkina Faso | 2009 | 0.932103 | 0.767737 |
| Burkina Faso | 2010 | 0.933339 | 0.766071 |
| Burkina Faso | 2011 | 0.936167 | 0.762728 |
| Burkina Faso | 2012 | 0.933527 | 0.758505 |
| Burkina Faso | 2013 | 0.934327 | 0.753482 |
| Burkina Faso | 2014 | 0.946187 | 0.758672 |
| Burkina Faso | 2015 | 0.965308 | 0.770071 |
| Burkina Faso | 2016 | 0.981429 | 0.778676 |
| Burkina Faso | 2017 | 0.997016 | 0.7884   |
| Burkina Faso | 2018 | 1.006615 | 0.794704 |
| Burkina Faso | 2019 | 1.016562 | 0.801219 |
| Burundi      | 1990 | 0.687664 | 0.563286 |

1  
2  
3  
4  
5  
6  
7  
8  
9  
10  
11  
12  
13  
14  
15  
16  
17  
18  
19  
20  
21  
22  
23  
24  
25  
26  
27  
28  
29  
30  
31  
32  
33  
34  
35  
36  
37  
38  
39  
40  
41  
42  
43  
44  
45  
46

|         |      |          |          |
|---------|------|----------|----------|
| Burundi | 1991 | 0.694366 | 0.567374 |
| Burundi | 1992 | 0.699582 | 0.571893 |
| Burundi | 1993 | 0.698081 | 0.573959 |
| Burundi | 1994 | 0.696463 | 0.575131 |
| Burundi | 1995 | 0.698699 | 0.57815  |
| Burundi | 1996 | 0.712302 | 0.591291 |
| Burundi | 1997 | 0.719895 | 0.601894 |
| Burundi | 1998 | 0.728608 | 0.614085 |
| Burundi | 1999 | 0.737929 | 0.625256 |
| Burundi | 2000 | 0.734877 | 0.628305 |
| Burundi | 2001 | 0.734869 | 0.631386 |
| Burundi | 2002 | 0.733492 | 0.633296 |
| Burundi | 2003 | 0.733389 | 0.637925 |
| Burundi | 2004 | 0.729231 | 0.640778 |
| Burundi | 2005 | 0.718246 | 0.63823  |
| Burundi | 2006 | 0.703513 | 0.630502 |
| Burundi | 2007 | 0.683863 | 0.619678 |
| Burundi | 2008 | 0.666624 | 0.612776 |
| Burundi | 2009 | 0.663426 | 0.614655 |
| Burundi | 2010 | 0.660953 | 0.616004 |
| Burundi | 2011 | 0.656466 | 0.616586 |
| Burundi | 2012 | 0.654089 | 0.619867 |
| Burundi | 2013 | 0.652141 | 0.622567 |
| Burundi | 2014 | 0.6494   | 0.625271 |
| Burundi | 2015 | 0.644695 | 0.62811  |

|            |      |          |          |
|------------|------|----------|----------|
| Burundi    | 2016 | 0.636883 | 0.629837 |
| Burundi    | 2017 | 0.631132 | 0.632785 |
| Burundi    | 2018 | 0.628577 | 0.636035 |
| Burundi    | 2019 | 0.624937 | 0.639786 |
| Cabo Verde | 1990 | 0.785566 | 0.5739   |
| Cabo Verde | 1991 | 0.799078 | 0.581168 |
| Cabo Verde | 1992 | 0.800885 | 0.580711 |
| Cabo Verde | 1993 | 0.780252 | 0.565062 |
| Cabo Verde | 1994 | 0.769012 | 0.55496  |
| Cabo Verde | 1995 | 0.760016 | 0.546382 |
| Cabo Verde | 1996 | 0.725456 | 0.51886  |
| Cabo Verde | 1997 | 0.676563 | 0.479908 |
| Cabo Verde | 1998 | 0.676536 | 0.473741 |
| Cabo Verde | 1999 | 0.676218 | 0.467118 |
| Cabo Verde | 2000 | 0.68503  | 0.466719 |
| Cabo Verde | 2001 | 0.686608 | 0.46229  |
| Cabo Verde | 2002 | 0.688755 | 0.458328 |
| Cabo Verde | 2003 | 0.690284 | 0.453906 |
| Cabo Verde | 2004 | 0.687477 | 0.446744 |
| Cabo Verde | 2005 | 0.684518 | 0.439673 |
| Cabo Verde | 2006 | 0.777244 | 0.500204 |
| Cabo Verde | 2007 | 0.816068 | 0.528048 |
| Cabo Verde | 2008 | 0.819805 | 0.532151 |
| Cabo Verde | 2009 | 0.824293 | 0.537742 |
| Cabo Verde | 2010 | 0.83081  | 0.546195 |



1  
2  
3  
4  
5  
6  
7  
8  
9  
10  
11  
12  
13  
14  
15  
16  
17  
18  
19  
20  
21  
22  
23  
24  
25  
26  
27  
28  
29  
30  
31  
32  
33  
34  
35  
36  
37  
38  
39  
40  
41  
42  
43  
44  
45  
46

|            |      |          |          |
|------------|------|----------|----------|
| Cabo Verde | 2011 | 0.853879 | 0.565047 |
| Cabo Verde | 2012 | 0.875334 | 0.583896 |
| Cabo Verde | 2013 | 0.871868 | 0.58662  |
| Cabo Verde | 2014 | 0.904058 | 0.616563 |
| Cabo Verde | 2015 | 0.942277 | 0.652128 |
| Cabo Verde | 2016 | 1.004837 | 0.705484 |
| Cabo Verde | 2017 | 0.957232 | 0.681284 |
| Cabo Verde | 2018 | 0.696343 | 0.470762 |
| Cabo Verde | 2019 | 0.705846 | 0.473874 |
| Cambodia   | 1990 | 1.272435 | 0.929989 |
| Cambodia   | 1991 | 1.277283 | 0.931682 |
| Cambodia   | 1992 | 1.287046 | 0.936978 |
| Cambodia   | 1993 | 1.299802 | 0.944499 |
| Cambodia   | 1994 | 1.311296 | 0.951699 |
| Cambodia   | 1995 | 1.305299 | 0.947258 |
| Cambodia   | 1996 | 1.305278 | 0.945959 |
| Cambodia   | 1997 | 1.294164 | 0.937495 |
| Cambodia   | 1998 | 1.282978 | 0.929409 |
| Cambodia   | 1999 | 1.272036 | 0.922534 |
| Cambodia   | 2000 | 1.259729 | 0.913971 |
| Cambodia   | 2001 | 1.246865 | 0.905562 |
| Cambodia   | 2002 | 1.239166 | 0.900746 |
| Cambodia   | 2003 | 1.227679 | 0.89253  |
| Cambodia   | 2004 | 1.212898 | 0.88247  |
| Cambodia   | 2005 | 1.193716 | 0.869231 |

|    |          |      |          |          |
|----|----------|------|----------|----------|
| 1  |          |      |          |          |
| 2  |          |      |          |          |
| 3  |          |      |          |          |
| 4  |          |      |          |          |
| 5  | Cambodia | 2006 | 1.18145  | 0.860138 |
| 6  | Cambodia | 2007 | 1.164389 | 0.848923 |
| 7  | Cambodia | 2008 | 1.148449 | 0.838274 |
| 8  | Cambodia | 2009 | 1.137969 | 0.830565 |
| 9  | Cambodia | 2010 | 1.134267 | 0.827896 |
| 10 | Cambodia | 2011 | 1.13422  | 0.827352 |
| 11 | Cambodia | 2012 | 1.135837 | 0.828119 |
| 12 | Cambodia | 2013 | 1.140934 | 0.831604 |
| 13 | Cambodia | 2014 | 1.14328  | 0.833467 |
| 14 | Cambodia | 2015 | 1.144017 | 0.833629 |
| 15 | Cambodia | 2016 | 1.146845 | 0.835286 |
| 16 | Cambodia | 2017 | 1.150349 | 0.836871 |
| 17 | Cambodia | 2018 | 1.152662 | 0.837604 |
| 18 | Cambodia | 2019 | 1.155105 | 0.838245 |
| 19 | Cameroon | 1990 | 1.147025 | 1.039542 |
| 20 | Cameroon | 1991 | 1.13009  | 1.023941 |
| 21 | Cameroon | 1992 | 1.11613  | 1.010117 |
| 22 | Cameroon | 1993 | 1.09613  | 0.991193 |
| 23 | Cameroon | 1994 | 1.085801 | 0.980193 |
| 24 | Cameroon | 1995 | 1.066587 | 0.962355 |
| 25 | Cameroon | 1996 | 1.04273  | 0.941254 |
| 26 | Cameroon | 1997 | 1.038881 | 0.934436 |
| 27 | Cameroon | 1998 | 1.030364 | 0.926553 |
| 28 | Cameroon | 1999 | 1.010618 | 0.908515 |
| 29 | Cameroon | 2000 | 0.99371  | 0.892449 |
| 30 |          |      |          |          |
| 31 |          |      |          |          |
| 32 |          |      |          |          |
| 33 |          |      |          |          |
| 34 |          |      |          |          |
| 35 |          |      |          |          |
| 36 |          |      |          |          |
| 37 |          |      |          |          |
| 38 |          |      |          |          |
| 39 |          |      |          |          |
| 40 |          |      |          |          |
| 41 |          |      |          |          |
| 42 |          |      |          |          |
| 43 |          |      |          |          |
| 44 |          |      |          |          |
| 45 |          |      |          |          |
| 46 |          |      |          |          |

|    |          |      |          |          |
|----|----------|------|----------|----------|
| 1  |          |      |          |          |
| 2  |          |      |          |          |
| 3  |          |      |          |          |
| 4  |          |      |          |          |
| 5  | Cameroon | 2001 | 0.973748 | 0.875349 |
| 6  | Cameroon | 2002 | 0.961464 | 0.860027 |
| 7  | Cameroon | 2003 | 0.950572 | 0.851844 |
| 8  | Cameroon | 2004 | 0.939277 | 0.843458 |
| 9  | Cameroon | 2005 | 0.925508 | 0.832964 |
| 10 | Cameroon | 2006 | 0.916299 | 0.824142 |
| 11 | Cameroon | 2007 | 0.904462 | 0.813191 |
| 12 | Cameroon | 2008 | 0.886022 | 0.796672 |
| 13 | Cameroon | 2009 | 0.876197 | 0.787422 |
| 14 | Cameroon | 2010 | 0.879262 | 0.788679 |
| 15 | Cameroon | 2011 | 0.880561 | 0.789209 |
| 16 | Cameroon | 2012 | 0.878504 | 0.786955 |
| 17 | Cameroon | 2013 | 0.876201 | 0.784414 |
| 18 | Cameroon | 2014 | 0.88642  | 0.793444 |
| 19 | Cameroon | 2015 | 0.894119 | 0.799428 |
| 20 | Cameroon | 2016 | 0.901086 | 0.806824 |
| 21 | Cameroon | 2017 | 0.904634 | 0.810746 |
| 22 | Cameroon | 2018 | 0.904815 | 0.812334 |
| 23 | Cameroon | 2019 | 0.906643 | 0.815062 |
| 24 | Canada   | 1990 | 1.071669 | 0.656583 |
| 25 | Canada   | 1991 | 1.068419 | 0.651509 |
| 26 | Canada   | 1992 | 1.072055 | 0.651547 |
| 27 | Canada   | 1993 | 1.062733 | 0.64336  |
| 28 | Canada   | 1994 | 1.071188 | 0.646973 |
| 29 | Canada   | 1995 | 1.056516 | 0.635922 |
| 30 |          |      |          |          |
| 31 |          |      |          |          |
| 32 |          |      |          |          |
| 33 |          |      |          |          |
| 34 |          |      |          |          |
| 35 |          |      |          |          |
| 36 |          |      |          |          |
| 37 |          |      |          |          |
| 38 |          |      |          |          |
| 39 |          |      |          |          |
| 40 |          |      |          |          |
| 41 |          |      |          |          |
| 42 |          |      |          |          |
| 43 |          |      |          |          |
| 44 |          |      |          |          |
| 45 |          |      |          |          |
| 46 |          |      |          |          |

|                          |      |          |          |
|--------------------------|------|----------|----------|
| Canada                   | 1996 | 1.06505  | 0.637783 |
| Canada                   | 1997 | 1.053599 | 0.628887 |
| Canada                   | 1998 | 1.053543 | 0.626099 |
| Canada                   | 1999 | 1.048713 | 0.618933 |
| Canada                   | 2000 | 1.075001 | 0.633436 |
| Canada                   | 2001 | 1.081442 | 0.635703 |
| Canada                   | 2002 | 1.090276 | 0.639234 |
| Canada                   | 2003 | 1.086281 | 0.636843 |
| Canada                   | 2004 | 1.090858 | 0.638593 |
| Canada                   | 2005 | 1.111257 | 0.652645 |
| Canada                   | 2006 | 1.138485 | 0.671429 |
| Canada                   | 2007 | 1.147179 | 0.680731 |
| Canada                   | 2008 | 1.155455 | 0.690482 |
| Canada                   | 2009 | 1.15475  | 0.694508 |
| Canada                   | 2010 | 1.166421 | 0.707449 |
| Canada                   | 2011 | 1.162524 | 0.712348 |
| Canada                   | 2012 | 1.14527  | 0.710073 |
| Canada                   | 2013 | 1.132927 | 0.710844 |
| Canada                   | 2014 | 1.127098 | 0.715051 |
| Canada                   | 2015 | 1.11813  | 0.716868 |
| Canada                   | 2016 | 1.106954 | 0.71676  |
| Canada                   | 2017 | 1.094248 | 0.715128 |
| Canada                   | 2018 | 1.074678 | 0.709354 |
| Canada                   | 2019 | 1.062453 | 0.707807 |
| Central African Republic | 1990 | 0.605335 | 0.494503 |

|                          |      |          |          |
|--------------------------|------|----------|----------|
| Central African Republic | 1991 | 0.595076 | 0.488287 |
| Central African Republic | 1992 | 0.579631 | 0.476163 |
| Central African Republic | 1993 | 0.593358 | 0.485861 |
| Central African Republic | 1994 | 0.597356 | 0.488188 |
| Central African Republic | 1995 | 0.60126  | 0.490392 |
| Central African Republic | 1996 | 0.606962 | 0.494629 |
| Central African Republic | 1997 | 0.606767 | 0.493809 |
| Central African Republic | 1998 | 0.60576  | 0.491861 |
| Central African Republic | 1999 | 0.601875 | 0.487075 |
| Central African Republic | 2000 | 0.599029 | 0.482639 |
| Central African Republic | 2001 | 0.598767 | 0.482322 |
| Central African Republic | 2002 | 0.601461 | 0.484166 |
| Central African Republic | 2003 | 0.60518  | 0.487199 |
| Central African Republic | 2004 | 0.605982 | 0.487695 |
| Central African Republic | 2005 | 0.60574  | 0.486763 |
| Central African Republic | 2006 | 0.606321 | 0.485265 |
| Central African Republic | 2007 | 0.605549 | 0.483734 |
| Central African Republic | 2008 | 0.602208 | 0.479866 |
| Central African Republic | 2009 | 0.602173 | 0.479239 |
| Central African Republic | 2010 | 0.600321 | 0.478502 |
| Central African Republic | 2011 | 0.601359 | 0.479995 |
| Central African Republic | 2012 | 0.604953 | 0.483166 |
| Central African Republic | 2013 | 0.609224 | 0.485905 |
| Central African Republic | 2014 | 0.609242 | 0.485843 |
| Central African Republic | 2015 | 0.606339 | 0.484164 |

|    |                          |      |          |          |
|----|--------------------------|------|----------|----------|
| 1  |                          |      |          |          |
| 2  |                          |      |          |          |
| 3  |                          |      |          |          |
| 4  |                          |      |          |          |
| 5  | Central African Republic | 2016 | 0.601069 | 0.48213  |
| 6  | Central African Republic | 2017 | 0.596947 | 0.480092 |
| 7  | Central African Republic | 2018 | 0.594318 | 0.478991 |
| 8  | Central African Republic | 2019 | 0.592694 | 0.479463 |
| 9  | Chad                     | 1990 | 0.834872 | 0.761775 |
| 10 | Chad                     | 1991 | 0.821838 | 0.752272 |
| 11 | Chad                     | 1992 | 0.80896  | 0.744471 |
| 12 | Chad                     | 1993 | 0.792107 | 0.732762 |
| 13 | Chad                     | 1994 | 0.769123 | 0.714465 |
| 14 | Chad                     | 1995 | 0.753542 | 0.702173 |
| 15 | Chad                     | 1996 | 0.731651 | 0.68299  |
| 16 | Chad                     | 1997 | 0.713377 | 0.666729 |
| 17 | Chad                     | 1998 | 0.700701 | 0.655117 |
| 18 | Chad                     | 1999 | 0.682246 | 0.638162 |
| 19 | Chad                     | 2000 | 0.669872 | 0.626096 |
| 20 | Chad                     | 2001 | 0.662084 | 0.61966  |
| 21 | Chad                     | 2002 | 0.65693  | 0.616713 |
| 22 | Chad                     | 2003 | 0.654422 | 0.618421 |
| 23 | Chad                     | 2004 | 0.644129 | 0.613396 |
| 24 | Chad                     | 2005 | 0.63571  | 0.610532 |
| 25 | Chad                     | 2006 | 0.628836 | 0.607959 |
| 26 | Chad                     | 2007 | 0.622864 | 0.607788 |
| 27 | Chad                     | 2008 | 0.614477 | 0.605515 |
| 28 | Chad                     | 2009 | 0.603446 | 0.603535 |
| 29 | Chad                     | 2010 | 0.597793 | 0.602175 |
| 30 |                          |      |          |          |
| 31 |                          |      |          |          |
| 32 |                          |      |          |          |
| 33 |                          |      |          |          |
| 34 |                          |      |          |          |
| 35 |                          |      |          |          |
| 36 |                          |      |          |          |
| 37 |                          |      |          |          |
| 38 |                          |      |          |          |
| 39 |                          |      |          |          |
| 40 |                          |      |          |          |
| 41 |                          |      |          |          |
| 42 |                          |      |          |          |
| 43 |                          |      |          |          |
| 44 |                          |      |          |          |
| 45 |                          |      |          |          |
| 46 |                          |      |          |          |

|       |      |          |          |
|-------|------|----------|----------|
| Chad  | 2011 | 0.591857 | 0.601036 |
| Chad  | 2012 | 0.586086 | 0.600795 |
| Chad  | 2013 | 0.582037 | 0.600969 |
| Chad  | 2014 | 0.578729 | 0.604162 |
| Chad  | 2015 | 0.577133 | 0.606962 |
| Chad  | 2016 | 0.577592 | 0.611944 |
| Chad  | 2017 | 0.579311 | 0.618026 |
| Chad  | 2018 | 0.579088 | 0.621805 |
| Chad  | 2019 | 0.578632 | 0.626191 |
| Chile | 1990 | 0.975267 | 0.789928 |
| Chile | 1991 | 1.004222 | 0.810795 |
| Chile | 1992 | 1.03789  | 0.832208 |
| Chile | 1993 | 1.027902 | 0.817282 |
| Chile | 1994 | 1.024455 | 0.811473 |
| Chile | 1995 | 1.007339 | 0.788872 |
| Chile | 1996 | 0.980229 | 0.755604 |
| Chile | 1997 | 0.99706  | 0.765156 |
| Chile | 1998 | 1.032587 | 0.788071 |
| Chile | 1999 | 1.05249  | 0.799165 |
| Chile | 2000 | 1.06127  | 0.804204 |
| Chile | 2001 | 1.073648 | 0.813752 |
| Chile | 2002 | 1.076179 | 0.809961 |
| Chile | 2003 | 1.080699 | 0.808243 |
| Chile | 2004 | 1.09034  | 0.810053 |
| Chile | 2005 | 1.098112 | 0.812524 |

|       |      |          |          |
|-------|------|----------|----------|
| Chile | 2006 | 1.101727 | 0.813429 |
| Chile | 2007 | 1.099118 | 0.810954 |
| Chile | 2008 | 1.101981 | 0.816507 |
| Chile | 2009 | 1.087498 | 0.804882 |
| Chile | 2010 | 1.090558 | 0.803135 |
| Chile | 2011 | 1.106878 | 0.813052 |
| Chile | 2012 | 1.114865 | 0.818805 |
| Chile | 2013 | 1.110409 | 0.816162 |
| Chile | 2014 | 1.0971   | 0.804446 |
| Chile | 2015 | 1.100775 | 0.805611 |
| Chile | 2016 | 1.103035 | 0.806088 |
| Chile | 2017 | 1.114846 | 0.814555 |
| Chile | 2018 | 1.11631  | 0.815553 |
| Chile | 2019 | 1.114836 | 0.814624 |
| China | 1990 | 0.967823 | 0.814115 |
| China | 1991 | 0.958559 | 0.806344 |
| China | 1992 | 0.957942 | 0.80596  |
| China | 1993 | 0.964164 | 0.811179 |
| China | 1994 | 0.973764 | 0.813081 |
| China | 1995 | 0.959877 | 0.800819 |
| China | 1996 | 0.957836 | 0.79771  |
| China | 1997 | 0.962476 | 0.799933 |
| China | 1998 | 0.959408 | 0.790422 |
| China | 1999 | 0.962405 | 0.793427 |
| China | 2000 | 0.96278  | 0.800564 |



|          |      |          |          |
|----------|------|----------|----------|
| China    | 2001 | 0.950333 | 0.789064 |
| China    | 2002 | 0.932042 | 0.776288 |
| China    | 2003 | 0.921262 | 0.772159 |
| China    | 2004 | 0.906997 | 0.757937 |
| China    | 2005 | 0.88725  | 0.735528 |
| China    | 2006 | 0.897301 | 0.739151 |
| China    | 2007 | 0.892122 | 0.729779 |
| China    | 2008 | 0.88588  | 0.720897 |
| China    | 2009 | 0.880109 | 0.711189 |
| China    | 2010 | 0.877856 | 0.705003 |
| China    | 2011 | 0.877119 | 0.697836 |
| China    | 2012 | 0.854498 | 0.672527 |
| China    | 2013 | 0.849703 | 0.664253 |
| China    | 2014 | 0.845928 | 0.661064 |
| China    | 2015 | 0.836498 | 0.650847 |
| China    | 2016 | 0.840203 | 0.651806 |
| China    | 2017 | 0.858599 | 0.666526 |
| China    | 2018 | 0.878564 | 0.683378 |
| China    | 2019 | 0.887628 | 0.688388 |
| Colombia | 1990 | 0.92605  | 0.87332  |
| Colombia | 1991 | 0.88317  | 0.835151 |
| Colombia | 1992 | 0.881827 | 0.827676 |
| Colombia | 1993 | 0.897087 | 0.835138 |
| Colombia | 1994 | 0.897415 | 0.830507 |
| Colombia | 1995 | 0.883693 | 0.818259 |

|          |      |          |          |
|----------|------|----------|----------|
| Colombia | 1996 | 0.860237 | 0.790636 |
| Colombia | 1997 | 0.876126 | 0.798379 |
| Colombia | 1998 | 0.887859 | 0.799727 |
| Colombia | 1999 | 0.863474 | 0.772837 |
| Colombia | 2000 | 0.849005 | 0.755909 |
| Colombia | 2001 | 0.850541 | 0.749405 |
| Colombia | 2002 | 0.737513 | 0.644557 |
| Colombia | 2003 | 0.823671 | 0.713566 |
| Colombia | 2004 | 0.815959 | 0.70425  |
| Colombia | 2005 | 0.846694 | 0.725794 |
| Colombia | 2006 | 0.823752 | 0.702385 |
| Colombia | 2007 | 0.834971 | 0.708499 |
| Colombia | 2008 | 0.821626 | 0.69362  |
| Colombia | 2009 | 0.771829 | 0.648857 |
| Colombia | 2010 | 0.78163  | 0.652348 |
| Colombia | 2011 | 0.791119 | 0.65474  |
| Colombia | 2012 | 0.786915 | 0.647334 |
| Colombia | 2013 | 0.795163 | 0.650472 |
| Colombia | 2014 | 0.847073 | 0.690264 |
| Colombia | 2015 | 0.832346 | 0.676081 |
| Colombia | 2016 | 0.829521 | 0.671116 |
| Colombia | 2017 | 0.828961 | 0.667807 |
| Colombia | 2018 | 0.843668 | 0.676432 |
| Colombia | 2019 | 0.843713 | 0.675001 |
| Comoros  | 1990 | 0.733786 | 0.662082 |

|         |      |          |          |
|---------|------|----------|----------|
| Comoros | 1991 | 0.7402   | 0.663758 |
| Comoros | 1992 | 0.745905 | 0.664646 |
| Comoros | 1993 | 0.757544 | 0.670189 |
| Comoros | 1994 | 0.766249 | 0.672645 |
| Comoros | 1995 | 0.775972 | 0.676143 |
| Comoros | 1996 | 0.789989 | 0.682161 |
| Comoros | 1997 | 0.802756 | 0.68778  |
| Comoros | 1998 | 0.828547 | 0.704046 |
| Comoros | 1999 | 0.860904 | 0.725442 |
| Comoros | 2000 | 0.88092  | 0.738351 |
| Comoros | 2001 | 0.907113 | 0.756097 |
| Comoros | 2002 | 0.917167 | 0.761638 |
| Comoros | 2003 | 0.939988 | 0.777236 |
| Comoros | 2004 | 0.947701 | 0.781221 |
| Comoros | 2005 | 0.953186 | 0.787593 |
| Comoros | 2006 | 0.96207  | 0.788326 |
| Comoros | 2007 | 0.950667 | 0.783126 |
| Comoros | 2008 | 0.954273 | 0.785029 |
| Comoros | 2009 | 0.965166 | 0.788867 |
| Comoros | 2010 | 0.983476 | 0.796443 |
| Comoros | 2011 | 0.986429 | 0.798943 |
| Comoros | 2012 | 0.993435 | 0.803484 |
| Comoros | 2013 | 0.994148 | 0.805074 |
| Comoros | 2014 | 0.99033  | 0.809445 |
| Comoros | 2015 | 0.995551 | 0.813129 |

|         |      |          |          |
|---------|------|----------|----------|
| Comoros | 2016 | 1.000726 | 0.815787 |
| Comoros | 2017 | 1.006585 | 0.819901 |
| Comoros | 2018 | 1.010868 | 0.821308 |
| Comoros | 2019 | 1.012969 | 0.822834 |
| Congo   | 1990 | 0.751571 | 0.620385 |
| Congo   | 1991 | 0.757008 | 0.620743 |
| Congo   | 1992 | 0.751454 | 0.61207  |
| Congo   | 1993 | 0.767738 | 0.621074 |
| Congo   | 1994 | 0.793581 | 0.640092 |
| Congo   | 1995 | 0.807649 | 0.649302 |
| Congo   | 1996 | 0.843536 | 0.675503 |
| Congo   | 1997 | 0.849181 | 0.678751 |
| Congo   | 1998 | 0.861181 | 0.681345 |
| Congo   | 1999 | 0.873966 | 0.688289 |
| Congo   | 2000 | 0.887117 | 0.693063 |
| Congo   | 2001 | 0.894852 | 0.695199 |
| Congo   | 2002 | 0.91501  | 0.707194 |
| Congo   | 2003 | 0.938097 | 0.727745 |
| Congo   | 2004 | 0.965721 | 0.749928 |
| Congo   | 2005 | 0.999334 | 0.777948 |
| Congo   | 2006 | 1.01017  | 0.790931 |
| Congo   | 2007 | 1.01219  | 0.799437 |
| Congo   | 2008 | 1.011191 | 0.805224 |
| Congo   | 2009 | 1.001536 | 0.805305 |
| Congo   | 2010 | 1.005744 | 0.814986 |

|              |      |          |          |
|--------------|------|----------|----------|
| Congo        | 2011 | 0.995978 | 0.812365 |
| Congo        | 2012 | 0.976587 | 0.809515 |
| Congo        | 2013 | 0.96994  | 0.812844 |
| Congo        | 2014 | 0.962707 | 0.814701 |
| Congo        | 2015 | 0.950028 | 0.810594 |
| Congo        | 2016 | 0.936194 | 0.807464 |
| Congo        | 2017 | 0.929756 | 0.808413 |
| Congo        | 2018 | 0.918173 | 0.804938 |
| Congo        | 2019 | 0.907093 | 0.801955 |
| Cook Islands | 1990 | 0.731273 | 0.737078 |
| Cook Islands | 1991 | 0.714071 | 0.722799 |
| Cook Islands | 1992 | 0.703288 | 0.713012 |
| Cook Islands | 1993 | 0.694466 | 0.703081 |
| Cook Islands | 1994 | 0.691835 | 0.697671 |
| Cook Islands | 1995 | 0.690798 | 0.693392 |
| Cook Islands | 1996 | 0.692286 | 0.692624 |
| Cook Islands | 1997 | 0.691053 | 0.690664 |
| Cook Islands | 1998 | 0.687318 | 0.687769 |
| Cook Islands | 1999 | 0.678993 | 0.681139 |
| Cook Islands | 2000 | 0.670422 | 0.674048 |
| Cook Islands | 2001 | 0.676639 | 0.680259 |
| Cook Islands | 2002 | 0.677434 | 0.678221 |
| Cook Islands | 2003 | 0.672888 | 0.667111 |
| Cook Islands | 2004 | 0.672924 | 0.657395 |
| Cook Islands | 2005 | 0.660459 | 0.636278 |

|    |              |      |          |          |
|----|--------------|------|----------|----------|
| 1  |              |      |          |          |
| 2  |              |      |          |          |
| 3  |              |      |          |          |
| 4  |              |      |          |          |
| 5  | Cook Islands | 2006 | 0.662874 | 0.630598 |
| 6  | Cook Islands | 2007 | 0.655072 | 0.618395 |
| 7  | Cook Islands | 2008 | 0.655387 | 0.615491 |
| 8  | Cook Islands | 2009 | 0.660637 | 0.619082 |
| 9  | Cook Islands | 2010 | 0.662691 | 0.621673 |
| 10 | Cook Islands | 2011 | 0.64694  | 0.607209 |
| 11 | Cook Islands | 2012 | 0.643794 | 0.603641 |
| 12 | Cook Islands | 2013 | 0.648095 | 0.605316 |
| 13 | Cook Islands | 2014 | 0.648776 | 0.602425 |
| 14 | Cook Islands | 2015 | 0.646748 | 0.597015 |
| 15 | Cook Islands | 2016 | 0.64459  | 0.590916 |
| 16 | Cook Islands | 2017 | 0.657328 | 0.598123 |
| 17 | Cook Islands | 2018 | 0.665537 | 0.601679 |
| 18 | Cook Islands | 2019 | 0.673095 | 0.605095 |
| 19 | Costa Rica   | 1990 | 0.842686 | 0.780245 |
| 20 | Costa Rica   | 1991 | 0.846408 | 0.779555 |
| 21 | Costa Rica   | 1992 | 0.801387 | 0.735808 |
| 22 | Costa Rica   | 1993 | 0.822401 | 0.751924 |
| 23 | Costa Rica   | 1994 | 0.818493 | 0.744542 |
| 24 | Costa Rica   | 1995 | 0.809652 | 0.735454 |
| 25 | Costa Rica   | 1996 | 0.823017 | 0.742523 |
| 26 | Costa Rica   | 1997 | 0.81881  | 0.739022 |
| 27 | Costa Rica   | 1998 | 0.833152 | 0.75157  |
| 28 | Costa Rica   | 1999 | 0.772513 | 0.695838 |
| 29 | Costa Rica   | 2000 | 0.772973 | 0.691908 |
| 30 |              |      |          |          |
| 31 |              |      |          |          |
| 32 |              |      |          |          |
| 33 |              |      |          |          |
| 34 |              |      |          |          |
| 35 |              |      |          |          |
| 36 |              |      |          |          |
| 37 |              |      |          |          |
| 38 |              |      |          |          |
| 39 |              |      |          |          |
| 40 |              |      |          |          |
| 41 |              |      |          |          |
| 42 |              |      |          |          |
| 43 |              |      |          |          |
| 44 |              |      |          |          |
| 45 |              |      |          |          |
| 46 |              |      |          |          |

|            |      |          |          |
|------------|------|----------|----------|
| Costa Rica | 2001 | 0.792404 | 0.706965 |
| Costa Rica | 2002 | 0.785335 | 0.698226 |
| Costa Rica | 2003 | 0.789385 | 0.699126 |
| Costa Rica | 2004 | 0.775158 | 0.685789 |
| Costa Rica | 2005 | 0.823794 | 0.726354 |
| Costa Rica | 2006 | 0.794886 | 0.69863  |
| Costa Rica | 2007 | 0.804319 | 0.704393 |
| Costa Rica | 2008 | 0.802687 | 0.700785 |
| Costa Rica | 2009 | 0.824271 | 0.715522 |
| Costa Rica | 2010 | 0.752826 | 0.65028  |
| Costa Rica | 2011 | 0.779381 | 0.666415 |
| Costa Rica | 2012 | 0.797407 | 0.675406 |
| Costa Rica | 2013 | 0.796876 | 0.669869 |
| Costa Rica | 2014 | 0.79033  | 0.658754 |
| Costa Rica | 2015 | 0.788694 | 0.653029 |
| Costa Rica | 2016 | 0.795657 | 0.658021 |
| Costa Rica | 2017 | 0.805902 | 0.664662 |
| Costa Rica | 2018 | 0.785138 | 0.644119 |
| Costa Rica | 2019 | 0.794065 | 0.647561 |
| Croatia    | 1990 | 1.120185 | 0.65127  |
| Croatia    | 1991 | 1.125968 | 0.653247 |
| Croatia    | 1992 | 1.121772 | 0.655144 |
| Croatia    | 1993 | 1.111291 | 0.645602 |
| Croatia    | 1994 | 1.121473 | 0.65099  |
| Croatia    | 1995 | 1.139708 | 0.659749 |

|         |      |          |          |
|---------|------|----------|----------|
| Croatia | 1996 | 1.161451 | 0.665951 |
| Croatia | 1997 | 1.152629 | 0.651192 |
| Croatia | 1998 | 1.166428 | 0.64639  |
| Croatia | 1999 | 1.196099 | 0.654948 |
| Croatia | 2000 | 1.216367 | 0.660369 |
| Croatia | 2001 | 1.220003 | 0.655333 |
| Croatia | 2002 | 1.248965 | 0.670539 |
| Croatia | 2003 | 1.232678 | 0.662375 |
| Croatia | 2004 | 1.28712  | 0.691856 |
| Croatia | 2005 | 1.241395 | 0.66823  |
| Croatia | 2006 | 1.256257 | 0.676099 |
| Croatia | 2007 | 1.282833 | 0.69208  |
| Croatia | 2008 | 1.256338 | 0.68161  |
| Croatia | 2009 | 1.257667 | 0.683845 |
| Croatia | 2010 | 1.318366 | 0.725261 |
| Croatia | 2011 | 1.290008 | 0.714134 |
| Croatia | 2012 | 1.250825 | 0.693977 |
| Croatia | 2013 | 1.318069 | 0.727072 |
| Croatia | 2014 | 1.304176 | 0.721959 |
| Croatia | 2015 | 1.322415 | 0.740471 |
| Croatia | 2016 | 1.287002 | 0.722383 |
| Croatia | 2017 | 1.265466 | 0.716749 |
| Croatia | 2018 | 1.256311 | 0.71655  |
| Croatia | 2019 | 1.242454 | 0.714384 |
| Cuba    | 1990 | 0.727847 | 0.702803 |



|      |      |          |          |
|------|------|----------|----------|
| Cuba | 1991 | 0.724469 | 0.694605 |
| Cuba | 1992 | 0.729795 | 0.694633 |
| Cuba | 1993 | 0.720995 | 0.682637 |
| Cuba | 1994 | 0.70017  | 0.659501 |
| Cuba | 1995 | 0.738602 | 0.691371 |
| Cuba | 1996 | 0.766014 | 0.714588 |
| Cuba | 1997 | 0.765753 | 0.712793 |
| Cuba | 1998 | 0.800248 | 0.743681 |
| Cuba | 1999 | 0.812952 | 0.753939 |
| Cuba | 2000 | 0.881295 | 0.814171 |
| Cuba | 2001 | 0.959164 | 0.883325 |
| Cuba | 2002 | 0.988012 | 0.90707  |
| Cuba | 2003 | 1.02399  | 0.936121 |
| Cuba | 2004 | 1.061575 | 0.965081 |
| Cuba | 2005 | 1.074199 | 0.973171 |
| Cuba | 2006 | 1.080161 | 0.975409 |
| Cuba | 2007 | 1.094049 | 0.985931 |
| Cuba | 2008 | 1.115955 | 1.001873 |
| Cuba | 2009 | 1.088237 | 0.972591 |
| Cuba | 2010 | 1.080138 | 0.961158 |
| Cuba | 2011 | 1.104658 | 0.980563 |
| Cuba | 2012 | 1.059809 | 0.939556 |
| Cuba | 2013 | 1.057449 | 0.934553 |
| Cuba | 2014 | 1.045602 | 0.920903 |
| Cuba | 2015 | 1.024565 | 0.900839 |

|    |        |      |          |          |
|----|--------|------|----------|----------|
| 1  |        |      |          |          |
| 2  |        |      |          |          |
| 3  |        |      |          |          |
| 4  |        |      |          |          |
| 5  | Cuba   | 2016 | 0.999353 | 0.875106 |
| 6  | Cuba   | 2017 | 0.976223 | 0.851947 |
| 7  | Cuba   | 2018 | 0.979438 | 0.850798 |
| 8  | Cuba   | 2019 | 0.984318 | 0.851479 |
| 9  | Cyprus | 1990 | 0.973492 | 0.995284 |
| 10 | Cyprus | 1991 | 0.870799 | 0.852337 |
| 11 | Cyprus | 1992 | 0.836617 | 0.776383 |
| 12 | Cyprus | 1993 | 0.865602 | 0.768364 |
| 13 | Cyprus | 1994 | 0.894084 | 0.769336 |
| 14 | Cyprus | 1995 | 0.884558 | 0.755664 |
| 15 | Cyprus | 1996 | 0.850063 | 0.727604 |
| 16 | Cyprus | 1997 | 0.836166 | 0.718292 |
| 17 | Cyprus | 1998 | 0.862069 | 0.738631 |
| 18 | Cyprus | 1999 | 0.890677 | 0.7614   |
| 19 | Cyprus | 2000 | 0.839486 | 0.709185 |
| 20 | Cyprus | 2001 | 0.828953 | 0.682359 |
| 21 | Cyprus | 2002 | 0.831988 | 0.672456 |
| 22 | Cyprus | 2003 | 0.888021 | 0.684125 |
| 23 | Cyprus | 2004 | 0.889668 | 0.677149 |
| 24 | Cyprus | 2005 | 0.883011 | 0.659401 |
| 25 | Cyprus | 2006 | 0.876697 | 0.632202 |
| 26 | Cyprus | 2007 | 0.867611 | 0.61137  |
| 27 | Cyprus | 2008 | 0.874585 | 0.601709 |
| 28 | Cyprus | 2009 | 0.842293 | 0.542734 |
| 29 | Cyprus | 2010 | 0.842268 | 0.527126 |
| 30 |        |      |          |          |
| 31 |        |      |          |          |
| 32 |        |      |          |          |
| 33 |        |      |          |          |
| 34 |        |      |          |          |
| 35 |        |      |          |          |
| 36 |        |      |          |          |
| 37 |        |      |          |          |
| 38 |        |      |          |          |
| 39 |        |      |          |          |
| 40 |        |      |          |          |
| 41 |        |      |          |          |
| 42 |        |      |          |          |
| 43 |        |      |          |          |
| 44 |        |      |          |          |
| 45 |        |      |          |          |
| 46 |        |      |          |          |

|    |         |      |          |          |
|----|---------|------|----------|----------|
| 1  |         |      |          |          |
| 2  |         |      |          |          |
| 3  |         |      |          |          |
| 4  |         |      |          |          |
| 5  | Cyprus  | 2011 | 0.902202 | 0.551805 |
| 6  | Cyprus  | 2012 | 0.932618 | 0.566257 |
| 7  | Cyprus  | 2013 | 0.954078 | 0.588914 |
| 8  | Cyprus  | 2014 | 0.981005 | 0.618201 |
| 9  | Cyprus  | 2015 | 0.972019 | 0.633882 |
| 10 | Cyprus  | 2016 | 0.994398 | 0.701614 |
| 11 | Cyprus  | 2017 | 1.049295 | 0.817407 |
| 12 | Cyprus  | 2018 | 1.005187 | 0.80001  |
| 13 | Cyprus  | 2019 | 0.963696 | 0.782896 |
| 14 | Czechia | 1990 | 1.016176 | 0.624468 |
| 15 | Czechia | 1991 | 1.092255 | 0.665403 |
| 16 | Czechia | 1992 | 1.114824 | 0.676432 |
| 17 | Czechia | 1993 | 1.165005 | 0.705793 |
| 18 | Czechia | 1994 | 1.161923 | 0.705491 |
| 19 | Czechia | 1995 | 1.221828 | 0.746068 |
| 20 | Czechia | 1996 | 1.210004 | 0.738504 |
| 21 | Czechia | 1997 | 1.2386   | 0.75613  |
| 22 | Czechia | 1998 | 1.243416 | 0.755395 |
| 23 | Czechia | 1999 | 1.216241 | 0.737046 |
| 24 | Czechia | 2000 | 1.251442 | 0.756081 |
| 25 | Czechia | 2001 | 1.23813  | 0.748034 |
| 26 | Czechia | 2002 | 1.232174 | 0.737573 |
| 27 | Czechia | 2003 | 1.2408   | 0.740963 |
| 28 | Czechia | 2004 | 1.219882 | 0.723872 |
| 29 | Czechia | 2005 | 1.260818 | 0.743677 |
| 30 |         |      |          |          |
| 31 |         |      |          |          |
| 32 |         |      |          |          |
| 33 |         |      |          |          |
| 34 |         |      |          |          |
| 35 |         |      |          |          |
| 36 |         |      |          |          |
| 37 |         |      |          |          |
| 38 |         |      |          |          |
| 39 |         |      |          |          |
| 40 |         |      |          |          |
| 41 |         |      |          |          |
| 42 |         |      |          |          |
| 43 |         |      |          |          |
| 44 |         |      |          |          |
| 45 |         |      |          |          |
| 46 |         |      |          |          |

|                 |      |          |          |
|-----------------|------|----------|----------|
| Czechia         | 2006 | 1.263043 | 0.740681 |
| Czechia         | 2007 | 1.254411 | 0.738889 |
| Czechia         | 2008 | 1.2398   | 0.735183 |
| Czechia         | 2009 | 1.218698 | 0.726824 |
| Czechia         | 2010 | 1.206849 | 0.719868 |
| Czechia         | 2011 | 1.208496 | 0.722033 |
| Czechia         | 2012 | 1.210538 | 0.724006 |
| Czechia         | 2013 | 1.220183 | 0.728389 |
| Czechia         | 2014 | 1.220982 | 0.727287 |
| Czechia         | 2015 | 1.22085  | 0.726128 |
| Czechia         | 2016 | 1.216345 | 0.725895 |
| Czechia         | 2017 | 1.174381 | 0.703135 |
| Czechia         | 2018 | 1.163977 | 0.704178 |
| Czechia         | 2019 | 1.15844  | 0.708733 |
| C Ț te d'Ivoire | 1990 | 0.608796 | 0.660555 |
| C Ț te d'Ivoire | 1991 | 0.595623 | 0.644126 |
| C Ț te d'Ivoire | 1992 | 0.578152 | 0.627977 |
| C Ț te d'Ivoire | 1993 | 0.56919  | 0.618807 |
| C Ț te d'Ivoire | 1994 | 0.557509 | 0.606066 |
| C Ț te d'Ivoire | 1995 | 0.549824 | 0.596539 |
| C Ț te d'Ivoire | 1996 | 0.548132 | 0.592989 |
| C Ț te d'Ivoire | 1997 | 0.552384 | 0.594317 |
| C Ț te d'Ivoire | 1998 | 0.559997 | 0.597753 |
| C Ț te d'Ivoire | 1999 | 0.564649 | 0.599111 |
| C Ț te d'Ivoire | 2000 | 0.571707 | 0.601928 |

|    |                                       |      |          |          |
|----|---------------------------------------|------|----------|----------|
| 1  |                                       |      |          |          |
| 2  |                                       |      |          |          |
| 3  |                                       |      |          |          |
| 4  |                                       |      |          |          |
| 5  | C 么 te d'Ivoire                       | 2001 | 0.585033 | 0.608489 |
| 6  | C 么 te d'Ivoire                       | 2002 | 0.595451 | 0.615232 |
| 7  | C 么 te d'Ivoire                       | 2003 | 0.602649 | 0.618669 |
| 8  | C 么 te d'Ivoire                       | 2004 | 0.604192 | 0.619534 |
| 9  | C 么 te d'Ivoire                       | 2005 | 0.613897 | 0.625708 |
| 10 | C 么 te d'Ivoire                       | 2006 | 0.622914 | 0.631968 |
| 11 | C 么 te d'Ivoire                       | 2007 | 0.625933 | 0.632453 |
| 12 | C 么 te d'Ivoire                       | 2008 | 0.630376 | 0.635391 |
| 13 | C 么 te d'Ivoire                       | 2009 | 0.632111 | 0.63704  |
| 14 | C 么 te d'Ivoire                       | 2010 | 0.629477 | 0.635272 |
| 15 | C 么 te d'Ivoire                       | 2011 | 0.627319 | 0.633461 |
| 16 | C 么 te d'Ivoire                       | 2012 | 0.625624 | 0.632268 |
| 17 | C 么 te d'Ivoire                       | 2013 | 0.623281 | 0.631079 |
| 18 | C 么 te d'Ivoire                       | 2014 | 0.62667  | 0.635978 |
| 19 | C 么 te d'Ivoire                       | 2015 | 0.631361 | 0.641248 |
| 20 | C 么 te d'Ivoire                       | 2016 | 0.635046 | 0.64627  |
| 21 | C 么 te d'Ivoire                       | 2017 | 0.637611 | 0.650224 |
| 22 | C 么 te d'Ivoire                       | 2018 | 0.641324 | 0.658071 |
| 23 | C 么 te d'Ivoire                       | 2019 | 0.643183 | 0.663257 |
| 24 | Democratic People's Republic of Korea | 1990 | 1.519679 | 0.93015  |
| 25 | Democratic People's Republic of Korea | 1991 | 1.517594 | 0.928075 |
| 26 | Democratic People's Republic of Korea | 1992 | 1.515332 | 0.925618 |
| 27 | Democratic People's Republic of Korea | 1993 | 1.511403 | 0.922131 |
| 28 | Democratic People's Republic of Korea | 1994 | 1.508383 | 0.918629 |
| 29 | Democratic People's Republic of Korea | 1995 | 1.50472  | 0.916326 |
| 30 |                                       |      |          |          |
| 31 |                                       |      |          |          |
| 32 |                                       |      |          |          |
| 33 |                                       |      |          |          |
| 34 |                                       |      |          |          |
| 35 |                                       |      |          |          |
| 36 |                                       |      |          |          |
| 37 |                                       |      |          |          |
| 38 |                                       |      |          |          |
| 39 |                                       |      |          |          |
| 40 |                                       |      |          |          |
| 41 |                                       |      |          |          |
| 42 |                                       |      |          |          |
| 43 |                                       |      |          |          |
| 44 |                                       |      |          |          |
| 45 |                                       |      |          |          |
| 46 |                                       |      |          |          |

|    |                                       |      |          |          |
|----|---------------------------------------|------|----------|----------|
| 1  |                                       |      |          |          |
| 2  |                                       |      |          |          |
| 3  |                                       |      |          |          |
| 4  |                                       |      |          |          |
| 5  | Democratic People's Republic of Korea | 1996 | 1.499132 | 0.914125 |
| 6  | Democratic People's Republic of Korea | 1997 | 1.48746  | 0.907333 |
| 7  | Democratic People's Republic of Korea | 1998 | 1.47484  | 0.898221 |
| 8  | Democratic People's Republic of Korea | 1999 | 1.465112 | 0.889807 |
| 9  | Democratic People's Republic of Korea | 2000 | 1.457588 | 0.883    |
| 10 | Democratic People's Republic of Korea | 2001 | 1.449234 | 0.87407  |
| 11 | Democratic People's Republic of Korea | 2002 | 1.439481 | 0.863734 |
| 12 | Democratic People's Republic of Korea | 2003 | 1.428879 | 0.857005 |
| 13 | Democratic People's Republic of Korea | 2004 | 1.420628 | 0.85164  |
| 14 | Democratic People's Republic of Korea | 2005 | 1.413032 | 0.846354 |
| 15 | Democratic People's Republic of Korea | 2006 | 1.408239 | 0.843679 |
| 16 | Democratic People's Republic of Korea | 2007 | 1.404697 | 0.842011 |
| 17 | Democratic People's Republic of Korea | 2008 | 1.404365 | 0.842973 |
| 18 | Democratic People's Republic of Korea | 2009 | 1.405944 | 0.8431   |
| 19 | Democratic People's Republic of Korea | 2010 | 1.404803 | 0.841923 |
| 20 | Democratic People's Republic of Korea | 2011 | 1.398525 | 0.838881 |
| 21 | Democratic People's Republic of Korea | 2012 | 1.386802 | 0.833673 |
| 22 | Democratic People's Republic of Korea | 2013 | 1.371735 | 0.82762  |
| 23 | Democratic People's Republic of Korea | 2014 | 1.353179 | 0.81921  |
| 24 | Democratic People's Republic of Korea | 2015 | 1.335352 | 0.811898 |
| 25 | Democratic People's Republic of Korea | 2016 | 1.318845 | 0.806027 |
| 26 | Democratic People's Republic of Korea | 2017 | 1.307835 | 0.803468 |
| 27 | Democratic People's Republic of Korea | 2018 | 1.299564 | 0.802576 |
| 28 | Democratic People's Republic of Korea | 2019 | 1.295109 | 0.802939 |
| 29 | Democratic Republic of the Congo      | 1990 | 0.725667 | 0.623441 |
| 30 |                                       |      |          |          |
| 31 |                                       |      |          |          |
| 32 |                                       |      |          |          |
| 33 |                                       |      |          |          |
| 34 |                                       |      |          |          |
| 35 |                                       |      |          |          |
| 36 |                                       |      |          |          |
| 37 |                                       |      |          |          |
| 38 |                                       |      |          |          |
| 39 |                                       |      |          |          |
| 40 |                                       |      |          |          |
| 41 |                                       |      |          |          |
| 42 |                                       |      |          |          |
| 43 |                                       |      |          |          |
| 44 |                                       |      |          |          |
| 45 |                                       |      |          |          |
| 46 |                                       |      |          |          |

1  
2  
3  
4  
5  
6  
7  
8  
9  
10  
11  
12  
13  
14  
15  
16  
17  
18  
19  
20  
21  
22  
23  
24  
25  
26  
27  
28  
29  
30  
31  
32  
33  
34  
35  
36  
37  
38  
39  
40  
41  
42  
43  
44  
45  
46

|                                  |      |          |          |
|----------------------------------|------|----------|----------|
| Democratic Republic of the Congo | 1991 | 0.740756 | 0.629281 |
| Democratic Republic of the Congo | 1992 | 0.75213  | 0.632608 |
| Democratic Republic of the Congo | 1993 | 0.766523 | 0.637728 |
| Democratic Republic of the Congo | 1994 | 0.77596  | 0.638698 |
| Democratic Republic of the Congo | 1995 | 0.783725 | 0.63836  |
| Democratic Republic of the Congo | 1996 | 0.809876 | 0.651945 |
| Democratic Republic of the Congo | 1997 | 0.808153 | 0.642786 |
| Democratic Republic of the Congo | 1998 | 0.825377 | 0.648066 |
| Democratic Republic of the Congo | 1999 | 0.839514 | 0.651081 |
| Democratic Republic of the Congo | 2000 | 0.857808 | 0.657211 |
| Democratic Republic of the Congo | 2001 | 0.880893 | 0.668343 |
| Democratic Republic of the Congo | 2002 | 0.900827 | 0.677205 |
| Democratic Republic of the Congo | 2003 | 0.915041 | 0.684614 |
| Democratic Republic of the Congo | 2004 | 0.928388 | 0.689952 |
| Democratic Republic of the Congo | 2005 | 0.935923 | 0.692857 |
| Democratic Republic of the Congo | 2006 | 0.938317 | 0.693584 |
| Democratic Republic of the Congo | 2007 | 0.934732 | 0.69219  |
| Democratic Republic of the Congo | 2008 | 0.927033 | 0.689089 |
| Democratic Republic of the Congo | 2009 | 0.92225  | 0.687671 |
| Democratic Republic of the Congo | 2010 | 0.913491 | 0.68321  |
| Democratic Republic of the Congo | 2011 | 0.903043 | 0.679241 |
| Democratic Republic of the Congo | 2012 | 0.896883 | 0.678318 |
| Democratic Republic of the Congo | 2013 | 0.889759 | 0.677695 |
| Democratic Republic of the Congo | 2014 | 0.884106 | 0.678253 |
| Democratic Republic of the Congo | 2015 | 0.885333 | 0.681047 |

|    |                                  |      |          |          |
|----|----------------------------------|------|----------|----------|
| 1  |                                  |      |          |          |
| 2  |                                  |      |          |          |
| 3  |                                  |      |          |          |
| 4  |                                  |      |          |          |
| 5  | Democratic Republic of the Congo | 2016 | 0.883509 | 0.685571 |
| 6  | Democratic Republic of the Congo | 2017 | 0.883648 | 0.690975 |
| 7  | Democratic Republic of the Congo | 2018 | 0.878558 | 0.693063 |
| 8  | Democratic Republic of the Congo | 2019 | 0.876196 | 0.69748  |
| 9  |                                  |      |          |          |
| 10 | Denmark                          | 1990 | 0.914828 | 0.580452 |
| 11 | Denmark                          | 1991 | 0.912012 | 0.572928 |
| 12 | Denmark                          | 1992 | 0.890685 | 0.554798 |
| 13 | Denmark                          | 1993 | 0.87468  | 0.544928 |
| 14 | Denmark                          | 1994 | 0.831742 | 0.522527 |
| 15 | Denmark                          | 1995 | 0.824691 | 0.520423 |
| 16 | Denmark                          | 1996 | 0.81649  | 0.514111 |
| 17 | Denmark                          | 1997 | 0.821561 | 0.517473 |
| 18 | Denmark                          | 1998 | 0.800373 | 0.502251 |
| 19 | Denmark                          | 1999 | 0.798478 | 0.504149 |
| 20 | Denmark                          | 2000 | 0.814684 | 0.504074 |
| 21 | Denmark                          | 2001 | 0.824117 | 0.502832 |
| 22 | Denmark                          | 2002 | 0.839073 | 0.506498 |
| 23 | Denmark                          | 2003 | 0.834985 | 0.501439 |
| 24 | Denmark                          | 2004 | 0.840014 | 0.504647 |
| 25 | Denmark                          | 2005 | 0.859294 | 0.51366  |
| 26 | Denmark                          | 2006 | 0.872854 | 0.519461 |
| 27 | Denmark                          | 2007 | 0.897032 | 0.531496 |
| 28 | Denmark                          | 2008 | 0.907035 | 0.535438 |
| 29 | Denmark                          | 2009 | 0.901804 | 0.534455 |
| 30 | Denmark                          | 2010 | 0.913237 | 0.543388 |
| 31 |                                  |      |          |          |
| 32 |                                  |      |          |          |
| 33 |                                  |      |          |          |
| 34 |                                  |      |          |          |
| 35 |                                  |      |          |          |
| 36 |                                  |      |          |          |
| 37 |                                  |      |          |          |
| 38 |                                  |      |          |          |
| 39 |                                  |      |          |          |
| 40 |                                  |      |          |          |
| 41 |                                  |      |          |          |
| 42 |                                  |      |          |          |
| 43 |                                  |      |          |          |
| 44 |                                  |      |          |          |
| 45 |                                  |      |          |          |
| 46 |                                  |      |          |          |



1  
2  
3  
4  
5  
6  
7  
8  
9  
10  
11  
12  
13  
14  
15  
16  
17  
18  
19  
20  
21  
22  
23  
24  
25  
26  
27  
28  
29  
30  
31  
32  
33  
34  
35  
36  
37  
38  
39  
40  
41  
42  
43  
44  
45  
46

|          |      |          |          |
|----------|------|----------|----------|
| Denmark  | 2011 | 0.930847 | 0.55667  |
| Denmark  | 2012 | 0.925529 | 0.557666 |
| Denmark  | 2013 | 0.909819 | 0.55261  |
| Denmark  | 2014 | 0.911329 | 0.558367 |
| Denmark  | 2015 | 0.920682 | 0.572028 |
| Denmark  | 2016 | 0.891396 | 0.563705 |
| Denmark  | 2017 | 0.87517  | 0.562369 |
| Denmark  | 2018 | 0.856567 | 0.559299 |
| Denmark  | 2019 | 0.83897  | 0.555753 |
| Djibouti | 1990 | 0.63711  | 0.62949  |
| Djibouti | 1991 | 0.640369 | 0.623249 |
| Djibouti | 1992 | 0.633152 | 0.617298 |
| Djibouti | 1993 | 0.612619 | 0.606712 |
| Djibouti | 1994 | 0.606436 | 0.600977 |
| Djibouti | 1995 | 0.597126 | 0.597611 |
| Djibouti | 1996 | 0.591292 | 0.597983 |
| Djibouti | 1997 | 0.591939 | 0.603648 |
| Djibouti | 1998 | 0.589677 | 0.60793  |
| Djibouti | 1999 | 0.591275 | 0.614159 |
| Djibouti | 2000 | 0.589404 | 0.615726 |
| Djibouti | 2001 | 0.588645 | 0.619655 |
| Djibouti | 2002 | 0.588821 | 0.624743 |
| Djibouti | 2003 | 0.59524  | 0.632076 |
| Djibouti | 2004 | 0.600295 | 0.640742 |
| Djibouti | 2005 | 0.604165 | 0.646974 |

|          |      |          |          |
|----------|------|----------|----------|
| Djibouti | 2006 | 0.607081 | 0.651123 |
| Djibouti | 2007 | 0.59813  | 0.646241 |
| Djibouti | 2008 | 0.592115 | 0.644566 |
| Djibouti | 2009 | 0.593195 | 0.649664 |
| Djibouti | 2010 | 0.596027 | 0.655453 |
| Djibouti | 2011 | 0.597782 | 0.661758 |
| Djibouti | 2012 | 0.601631 | 0.66921  |
| Djibouti | 2013 | 0.607341 | 0.678561 |
| Djibouti | 2014 | 0.609306 | 0.685456 |
| Djibouti | 2015 | 0.613572 | 0.691928 |
| Djibouti | 2016 | 0.616979 | 0.699061 |
| Djibouti | 2017 | 0.620938 | 0.707408 |
| Djibouti | 2018 | 0.622501 | 0.713307 |
| Djibouti | 2019 | 0.623897 | 0.718761 |
| Dominica | 1990 | 1.022575 | 0.68341  |
| Dominica | 1991 | 1.030748 | 0.681536 |
| Dominica | 1992 | 0.966633 | 0.635319 |
| Dominica | 1993 | 0.955614 | 0.621836 |
| Dominica | 1994 | 0.967154 | 0.623203 |
| Dominica | 1995 | 0.971693 | 0.621751 |
| Dominica | 1996 | 0.982772 | 0.625897 |
| Dominica | 1997 | 0.995791 | 0.633172 |
| Dominica | 1998 | 1.014203 | 0.645226 |
| Dominica | 1999 | 1.07042  | 0.681689 |
| Dominica | 2000 | 1.106362 | 0.706969 |

|                    |      |          |          |
|--------------------|------|----------|----------|
| Dominica           | 2001 | 1.133138 | 0.731554 |
| Dominica           | 2002 | 1.144745 | 0.752951 |
| Dominica           | 2003 | 1.130896 | 0.76167  |
| Dominica           | 2004 | 1.100279 | 0.756289 |
| Dominica           | 2005 | 1.098023 | 0.757618 |
| Dominica           | 2006 | 1.097205 | 0.766254 |
| Dominica           | 2007 | 1.086021 | 0.768361 |
| Dominica           | 2008 | 1.059714 | 0.765443 |
| Dominica           | 2009 | 1.039281 | 0.764358 |
| Dominica           | 2010 | 1.017251 | 0.762748 |
| Dominica           | 2011 | 1.00979  | 0.773488 |
| Dominica           | 2012 | 0.988291 | 0.776944 |
| Dominica           | 2013 | 0.972341 | 0.779038 |
| Dominica           | 2014 | 0.951066 | 0.776249 |
| Dominica           | 2015 | 0.929208 | 0.769479 |
| Dominica           | 2016 | 0.924913 | 0.775782 |
| Dominica           | 2017 | 0.916874 | 0.778058 |
| Dominica           | 2018 | 0.909062 | 0.779735 |
| Dominica           | 2019 | 0.902622 | 0.781262 |
| Dominican Republic | 1990 | 0.792257 | 0.775078 |
| Dominican Republic | 1991 | 0.813805 | 0.79193  |
| Dominican Republic | 1992 | 0.834425 | 0.808714 |
| Dominican Republic | 1993 | 0.867692 | 0.836164 |
| Dominican Republic | 1994 | 0.831727 | 0.799803 |
| Dominican Republic | 1995 | 0.788926 | 0.756014 |

|                    |      |          |          |
|--------------------|------|----------|----------|
| Dominican Republic | 1996 | 0.750525 | 0.710374 |
| Dominican Republic | 1997 | 0.727226 | 0.680711 |
| Dominican Republic | 1998 | 0.704717 | 0.653237 |
| Dominican Republic | 1999 | 0.655838 | 0.600255 |
| Dominican Republic | 2000 | 0.667709 | 0.608755 |
| Dominican Republic | 2001 | 0.683421 | 0.621056 |
| Dominican Republic | 2002 | 0.672707 | 0.608319 |
| Dominican Republic | 2003 | 0.688722 | 0.619241 |
| Dominican Republic | 2004 | 0.716078 | 0.641397 |
| Dominican Republic | 2005 | 0.748373 | 0.669059 |
| Dominican Republic | 2006 | 0.755305 | 0.675231 |
| Dominican Republic | 2007 | 0.762239 | 0.680346 |
| Dominican Republic | 2008 | 0.776457 | 0.691661 |
| Dominican Republic | 2009 | 0.795809 | 0.710386 |
| Dominican Republic | 2010 | 0.808009 | 0.727011 |
| Dominican Republic | 2011 | 0.795596 | 0.723439 |
| Dominican Republic | 2012 | 0.780869 | 0.71514  |
| Dominican Republic | 2013 | 0.77778  | 0.715245 |
| Dominican Republic | 2014 | 0.790124 | 0.729196 |
| Dominican Republic | 2015 | 0.802808 | 0.741573 |
| Dominican Republic | 2016 | 0.815963 | 0.755204 |
| Dominican Republic | 2017 | 0.835907 | 0.773302 |
| Dominican Republic | 2018 | 0.852982 | 0.787151 |
| Dominican Republic | 2019 | 0.867118 | 0.7988   |
| Ecuador            | 1990 | 1.004058 | 1.011805 |

|         |      |          |          |
|---------|------|----------|----------|
| Ecuador | 1991 | 0.968923 | 0.969688 |
| Ecuador | 1992 | 1.003831 | 0.998713 |
| Ecuador | 1993 | 0.991662 | 0.981519 |
| Ecuador | 1994 | 0.975175 | 0.96323  |
| Ecuador | 1995 | 0.969265 | 0.958788 |
| Ecuador | 1996 | 0.955254 | 0.945169 |
| Ecuador | 1997 | 0.963522 | 0.948701 |
| Ecuador | 1998 | 0.952234 | 0.929045 |
| Ecuador | 1999 | 0.923097 | 0.898357 |
| Ecuador | 2000 | 0.945688 | 0.918728 |
| Ecuador | 2001 | 0.850152 | 0.82902  |
| Ecuador | 2002 | 0.961827 | 0.929527 |
| Ecuador | 2003 | 1.002522 | 0.961998 |
| Ecuador | 2004 | 0.951695 | 0.910259 |
| Ecuador | 2005 | 0.933601 | 0.891627 |
| Ecuador | 2006 | 0.935124 | 0.891747 |
| Ecuador | 2007 | 0.923045 | 0.875347 |
| Ecuador | 2008 | 0.908829 | 0.848903 |
| Ecuador | 2009 | 0.909745 | 0.838831 |
| Ecuador | 2010 | 0.905887 | 0.830621 |
| Ecuador | 2011 | 0.872038 | 0.795452 |
| Ecuador | 2012 | 0.948539 | 0.857824 |
| Ecuador | 2013 | 0.954923 | 0.857567 |
| Ecuador | 2014 | 0.945461 | 0.846159 |
| Ecuador | 2015 | 0.933084 | 0.834753 |

|         |      |          |          |
|---------|------|----------|----------|
| Ecuador | 2016 | 0.940996 | 0.838891 |
| Ecuador | 2017 | 0.946693 | 0.839503 |
| Ecuador | 2018 | 0.958062 | 0.848115 |
| Ecuador | 2019 | 0.982864 | 0.871573 |
| Egypt   | 1990 | 1.352837 | 1.300901 |
| Egypt   | 1991 | 1.345168 | 1.317427 |
| Egypt   | 1992 | 1.356801 | 1.35033  |
| Egypt   | 1993 | 1.359543 | 1.369332 |
| Egypt   | 1994 | 1.336761 | 1.356111 |
| Egypt   | 1995 | 1.314426 | 1.347094 |
| Egypt   | 1996 | 1.356722 | 1.410277 |
| Egypt   | 1997 | 1.367379 | 1.441698 |
| Egypt   | 1998 | 1.367158 | 1.459711 |
| Egypt   | 1999 | 1.357297 | 1.482505 |
| Egypt   | 2000 | 1.355486 | 1.547564 |
| Egypt   | 2001 | 1.340398 | 1.572534 |
| Egypt   | 2002 | 1.300644 | 1.537725 |
| Egypt   | 2003 | 1.241502 | 1.444409 |
| Egypt   | 2004 | 1.231767 | 1.42514  |
| Egypt   | 2005 | 1.259757 | 1.48129  |
| Egypt   | 2006 | 1.273849 | 1.56127  |
| Egypt   | 2007 | 1.241724 | 1.559132 |
| Egypt   | 2008 | 1.2281   | 1.558302 |
| Egypt   | 2009 | 1.221783 | 1.566194 |
| Egypt   | 2010 | 1.223014 | 1.588974 |

1  
2  
3  
4  
5  
6  
7  
8  
9  
10  
11  
12  
13  
14  
15  
16  
17  
18  
19  
20  
21  
22  
23  
24  
25  
26  
27  
28  
29  
30  
31  
32  
33  
34  
35  
36  
37  
38  
39  
40  
41  
42  
43  
44  
45  
46

|             |      |          |          |
|-------------|------|----------|----------|
| Egypt       | 2011 | 1.166152 | 1.543971 |
| Egypt       | 2012 | 1.181251 | 1.56277  |
| Egypt       | 2013 | 1.128811 | 1.5249   |
| Egypt       | 2014 | 1.142337 | 1.587852 |
| Egypt       | 2015 | 1.165619 | 1.642986 |
| Egypt       | 2016 | 1.160821 | 1.652987 |
| Egypt       | 2017 | 1.148174 | 1.63138  |
| Egypt       | 2018 | 1.137364 | 1.622527 |
| Egypt       | 2019 | 1.124721 | 1.598394 |
| El Salvador | 1990 | 0.73088  | 0.628185 |
| El Salvador | 1991 | 0.70667  | 0.605372 |
| El Salvador | 1992 | 0.706118 | 0.602843 |
| El Salvador | 1993 | 0.690439 | 0.588379 |
| El Salvador | 1994 | 0.691847 | 0.586128 |
| El Salvador | 1995 | 0.625846 | 0.525309 |
| El Salvador | 1996 | 0.678738 | 0.566622 |
| El Salvador | 1997 | 0.642916 | 0.534002 |
| El Salvador | 1998 | 0.567219 | 0.466982 |
| El Salvador | 1999 | 0.592851 | 0.484268 |
| El Salvador | 2000 | 0.547509 | 0.443736 |
| El Salvador | 2001 | 0.570958 | 0.459772 |
| El Salvador | 2002 | 0.57284  | 0.458034 |
| El Salvador | 2003 | 0.540174 | 0.428803 |
| El Salvador | 2004 | 0.519341 | 0.408988 |
| El Salvador | 2005 | 0.506918 | 0.396288 |

|    |                   |      |          |          |
|----|-------------------|------|----------|----------|
| 1  |                   |      |          |          |
| 2  |                   |      |          |          |
| 3  |                   |      |          |          |
| 4  |                   |      |          |          |
| 5  | El Salvador       | 2006 | 0.491691 | 0.381601 |
| 6  | El Salvador       | 2007 | 0.506517 | 0.390121 |
| 7  | El Salvador       | 2008 | 0.5161   | 0.394159 |
| 8  | El Salvador       | 2009 | 0.523686 | 0.396446 |
| 9  | El Salvador       | 2010 | 0.551921 | 0.415391 |
| 10 | El Salvador       | 2011 | 0.554047 | 0.414798 |
| 11 | El Salvador       | 2012 | 0.581725 | 0.432742 |
| 12 | El Salvador       | 2013 | 0.60464  | 0.447815 |
| 13 | El Salvador       | 2014 | 0.563794 | 0.416177 |
| 14 | El Salvador       | 2015 | 0.565509 | 0.415662 |
| 15 | El Salvador       | 2016 | 0.560112 | 0.409023 |
| 16 | El Salvador       | 2017 | 0.573525 | 0.415772 |
| 17 | El Salvador       | 2018 | 0.589898 | 0.425152 |
| 18 | El Salvador       | 2019 | 0.588189 | 0.420935 |
| 19 | Equatorial Guinea | 1990 | 0.633973 | 0.475046 |
| 20 | Equatorial Guinea | 1991 | 0.643732 | 0.476437 |
| 21 | Equatorial Guinea | 1992 | 0.648953 | 0.474689 |
| 22 | Equatorial Guinea | 1993 | 0.667183 | 0.482076 |
| 23 | Equatorial Guinea | 1994 | 0.685891 | 0.489868 |
| 24 | Equatorial Guinea | 1995 | 0.695666 | 0.493196 |
| 25 | Equatorial Guinea | 1996 | 0.719499 | 0.505742 |
| 26 | Equatorial Guinea | 1997 | 0.726417 | 0.506651 |
| 27 | Equatorial Guinea | 1998 | 0.743037 | 0.514358 |
| 28 | Equatorial Guinea | 1999 | 0.75764  | 0.522421 |
| 29 | Equatorial Guinea | 2000 | 0.771162 | 0.530608 |
| 30 |                   |      |          |          |
| 31 |                   |      |          |          |
| 32 |                   |      |          |          |
| 33 |                   |      |          |          |
| 34 |                   |      |          |          |
| 35 |                   |      |          |          |
| 36 |                   |      |          |          |
| 37 |                   |      |          |          |
| 38 |                   |      |          |          |
| 39 |                   |      |          |          |
| 40 |                   |      |          |          |
| 41 |                   |      |          |          |
| 42 |                   |      |          |          |
| 43 |                   |      |          |          |
| 44 |                   |      |          |          |
| 45 |                   |      |          |          |
| 46 |                   |      |          |          |



1  
2  
3  
4  
5  
6  
7  
8  
9  
10  
11  
12  
13  
14  
15  
16  
17  
18  
19  
20  
21  
22  
23  
24  
25  
26  
27  
28  
29  
30  
31  
32  
33  
34  
35  
36  
37  
38  
39  
40  
41  
42  
43  
44  
45  
46

|                   |      |          |          |
|-------------------|------|----------|----------|
| Equatorial Guinea | 2001 | 0.78625  | 0.541806 |
| Equatorial Guinea | 2002 | 0.813222 | 0.560839 |
| Equatorial Guinea | 2003 | 0.844645 | 0.586309 |
| Equatorial Guinea | 2004 | 0.864957 | 0.605754 |
| Equatorial Guinea | 2005 | 0.883082 | 0.624017 |
| Equatorial Guinea | 2006 | 0.89857  | 0.641249 |
| Equatorial Guinea | 2007 | 0.903298 | 0.651933 |
| Equatorial Guinea | 2008 | 0.921692 | 0.668859 |
| Equatorial Guinea | 2009 | 0.937131 | 0.689382 |
| Equatorial Guinea | 2010 | 0.954428 | 0.707902 |
| Equatorial Guinea | 2011 | 0.94896  | 0.713287 |
| Equatorial Guinea | 2012 | 0.934341 | 0.710454 |
| Equatorial Guinea | 2013 | 0.911668 | 0.701174 |
| Equatorial Guinea | 2014 | 0.904311 | 0.702942 |
| Equatorial Guinea | 2015 | 0.913769 | 0.712517 |
| Equatorial Guinea | 2016 | 0.908977 | 0.71704  |
| Equatorial Guinea | 2017 | 0.899726 | 0.715847 |
| Equatorial Guinea | 2018 | 0.895166 | 0.716091 |
| Equatorial Guinea | 2019 | 0.892762 | 0.716859 |
| Eritrea           | 1990 | 0.677516 | 0.486014 |
| Eritrea           | 1991 | 0.66837  | 0.481683 |
| Eritrea           | 1992 | 0.653672 | 0.476384 |
| Eritrea           | 1993 | 0.635299 | 0.468895 |
| Eritrea           | 1994 | 0.617765 | 0.463212 |
| Eritrea           | 1995 | 0.585629 | 0.44997  |

|         |      |          |          |
|---------|------|----------|----------|
| Eritrea | 1996 | 0.592799 | 0.455702 |
| Eritrea | 1997 | 0.604464 | 0.46541  |
| Eritrea | 1998 | 0.622404 | 0.477271 |
| Eritrea | 1999 | 0.635233 | 0.488692 |
| Eritrea | 2000 | 0.652666 | 0.502612 |
| Eritrea | 2001 | 0.672426 | 0.51557  |
| Eritrea | 2002 | 0.682087 | 0.528655 |
| Eritrea | 2003 | 0.696141 | 0.540144 |
| Eritrea | 2004 | 0.706811 | 0.548242 |
| Eritrea | 2005 | 0.717387 | 0.555826 |
| Eritrea | 2006 | 0.721666 | 0.559545 |
| Eritrea | 2007 | 0.726562 | 0.563659 |
| Eritrea | 2008 | 0.729562 | 0.567179 |
| Eritrea | 2009 | 0.733471 | 0.571313 |
| Eritrea | 2010 | 0.736993 | 0.57369  |
| Eritrea | 2011 | 0.747012 | 0.581633 |
| Eritrea | 2012 | 0.75857  | 0.592977 |
| Eritrea | 2013 | 0.770296 | 0.603493 |
| Eritrea | 2014 | 0.780923 | 0.612417 |
| Eritrea | 2015 | 0.787631 | 0.620088 |
| Eritrea | 2016 | 0.794511 | 0.628143 |
| Eritrea | 2017 | 0.800615 | 0.636744 |
| Eritrea | 2018 | 0.801815 | 0.641395 |
| Eritrea | 2019 | 0.803849 | 0.647501 |
| Estonia | 1990 | 1.274667 | 0.544356 |

|    |         |      |          |          |
|----|---------|------|----------|----------|
| 1  |         |      |          |          |
| 2  |         |      |          |          |
| 3  |         |      |          |          |
| 4  |         |      |          |          |
| 5  | Estonia | 1991 | 1.290002 | 0.556613 |
| 6  | Estonia | 1992 | 1.239721 | 0.541388 |
| 7  | Estonia | 1993 | 1.200974 | 0.542798 |
| 8  | Estonia | 1994 | 1.151173 | 0.550592 |
| 9  | Estonia | 1995 | 1.128166 | 0.54486  |
| 10 | Estonia | 1996 | 1.176935 | 0.562217 |
| 11 | Estonia | 1997 | 1.14876  | 0.552321 |
| 12 | Estonia | 1998 | 1.1261   | 0.544524 |
| 13 | Estonia | 1999 | 1.166972 | 0.555235 |
| 14 | Estonia | 2000 | 1.255561 | 0.597795 |
| 15 | Estonia | 2001 | 1.252541 | 0.599208 |
| 16 | Estonia | 2002 | 1.205019 | 0.568907 |
| 17 | Estonia | 2003 | 1.249495 | 0.580201 |
| 18 | Estonia | 2004 | 1.197993 | 0.548705 |
| 19 | Estonia | 2005 | 1.175965 | 0.531529 |
| 20 | Estonia | 2006 | 1.137999 | 0.513165 |
| 21 | Estonia | 2007 | 1.110521 | 0.499568 |
| 22 | Estonia | 2008 | 1.187032 | 0.526966 |
| 23 | Estonia | 2009 | 1.18254  | 0.520329 |
| 24 | Estonia | 2010 | 1.25962  | 0.543306 |
| 25 | Estonia | 2011 | 1.367921 | 0.587629 |
| 26 | Estonia | 2012 | 1.43354  | 0.605071 |
| 27 | Estonia | 2013 | 1.638015 | 0.678218 |
| 28 | Estonia | 2014 | 1.681019 | 0.688145 |
| 29 | Estonia | 2015 | 1.90245  | 0.76673  |
| 30 |         |      |          |          |
| 31 |         |      |          |          |
| 32 |         |      |          |          |
| 33 |         |      |          |          |
| 34 |         |      |          |          |
| 35 |         |      |          |          |
| 36 |         |      |          |          |
| 37 |         |      |          |          |
| 38 |         |      |          |          |
| 39 |         |      |          |          |
| 40 |         |      |          |          |
| 41 |         |      |          |          |
| 42 |         |      |          |          |
| 43 |         |      |          |          |
| 44 |         |      |          |          |
| 45 |         |      |          |          |
| 46 |         |      |          |          |

|          |      |          |          |
|----------|------|----------|----------|
| Estonia  | 2016 | 1.966618 | 0.787203 |
| Estonia  | 2017 | 1.978323 | 0.797514 |
| Estonia  | 2018 | 1.945837 | 0.792401 |
| Estonia  | 2019 | 1.91689  | 0.789282 |
| Eswatini | 1990 | 0.643432 | 0.445885 |
| Eswatini | 1991 | 0.655902 | 0.454929 |
| Eswatini | 1992 | 0.663034 | 0.459787 |
| Eswatini | 1993 | 0.659477 | 0.458163 |
| Eswatini | 1994 | 0.641934 | 0.450227 |
| Eswatini | 1995 | 0.629765 | 0.446376 |
| Eswatini | 1996 | 0.592986 | 0.428342 |
| Eswatini | 1997 | 0.575288 | 0.419633 |
| Eswatini | 1998 | 0.56769  | 0.418709 |
| Eswatini | 1999 | 0.58138  | 0.430021 |
| Eswatini | 2000 | 0.615204 | 0.455989 |
| Eswatini | 2001 | 0.622836 | 0.464538 |
| Eswatini | 2002 | 0.648366 | 0.482734 |
| Eswatini | 2003 | 0.645587 | 0.482052 |
| Eswatini | 2004 | 0.637776 | 0.475359 |
| Eswatini | 2005 | 0.637936 | 0.473051 |
| Eswatini | 2006 | 0.619484 | 0.459317 |
| Eswatini | 2007 | 0.596666 | 0.442398 |
| Eswatini | 2008 | 0.56799  | 0.420904 |
| Eswatini | 2009 | 0.549777 | 0.405457 |
| Eswatini | 2010 | 0.532729 | 0.390103 |

1  
2  
3  
4  
5  
6  
7  
8  
9  
10  
11  
12  
13  
14  
15  
16  
17  
18  
19  
20  
21  
22  
23  
24  
25  
26  
27  
28  
29  
30  
31  
32  
33  
34  
35  
36  
37  
38  
39  
40  
41  
42  
43  
44  
45  
46

|          |      |          |          |
|----------|------|----------|----------|
| Eswatini | 2011 | 0.519468 | 0.377501 |
| Eswatini | 2012 | 0.512695 | 0.369766 |
| Eswatini | 2013 | 0.511534 | 0.36584  |
| Eswatini | 2014 | 0.513582 | 0.364059 |
| Eswatini | 2015 | 0.512443 | 0.360656 |
| Eswatini | 2016 | 0.510467 | 0.35706  |
| Eswatini | 2017 | 0.514681 | 0.357329 |
| Eswatini | 2018 | 0.519338 | 0.357931 |
| Eswatini | 2019 | 0.524167 | 0.358968 |
| Ethiopia | 1990 | 0.720756 | 0.703844 |
| Ethiopia | 1991 | 0.715509 | 0.706314 |
| Ethiopia | 1992 | 0.718831 | 0.717897 |
| Ethiopia | 1993 | 0.720067 | 0.728498 |
| Ethiopia | 1994 | 0.721361 | 0.73772  |
| Ethiopia | 1995 | 0.720699 | 0.743548 |
| Ethiopia | 1996 | 0.720125 | 0.749094 |
| Ethiopia | 1997 | 0.718258 | 0.753969 |
| Ethiopia | 1998 | 0.724515 | 0.767056 |
| Ethiopia | 1999 | 0.728246 | 0.775891 |
| Ethiopia | 2000 | 0.71538  | 0.766805 |
| Ethiopia | 2001 | 0.705973 | 0.758366 |
| Ethiopia | 2002 | 0.699858 | 0.754009 |
| Ethiopia | 2003 | 0.692711 | 0.749821 |
| Ethiopia | 2004 | 0.689158 | 0.749999 |
| Ethiopia | 2005 | 0.690604 | 0.752846 |

|          |      |          |          |
|----------|------|----------|----------|
| Ethiopia | 2006 | 0.682452 | 0.745788 |
| Ethiopia | 2007 | 0.671544 | 0.734216 |
| Ethiopia | 2008 | 0.659778 | 0.722532 |
| Ethiopia | 2009 | 0.65182  | 0.715305 |
| Ethiopia | 2010 | 0.643618 | 0.708825 |
| Ethiopia | 2011 | 0.641285 | 0.705564 |
| Ethiopia | 2012 | 0.633994 | 0.697198 |
| Ethiopia | 2013 | 0.62824  | 0.691475 |
| Ethiopia | 2014 | 0.626243 | 0.687038 |
| Ethiopia | 2015 | 0.625936 | 0.68562  |
| Ethiopia | 2016 | 0.629331 | 0.686995 |
| Ethiopia | 2017 | 0.638242 | 0.693243 |
| Ethiopia | 2018 | 0.645523 | 0.699145 |
| Ethiopia | 2019 | 0.651966 | 0.705008 |
| Fiji     | 1990 | 0.73655  | 0.628208 |
| Fiji     | 1991 | 0.723556 | 0.608009 |
| Fiji     | 1992 | 0.714756 | 0.592527 |
| Fiji     | 1993 | 0.705691 | 0.578871 |
| Fiji     | 1994 | 0.69546  | 0.563871 |
| Fiji     | 1995 | 0.691654 | 0.557138 |
| Fiji     | 1996 | 0.700723 | 0.561307 |
| Fiji     | 1997 | 0.704771 | 0.562422 |
| Fiji     | 1998 | 0.706182 | 0.563969 |
| Fiji     | 1999 | 0.687221 | 0.548343 |
| Fiji     | 2000 | 0.689676 | 0.54438  |

1  
2  
3  
4  
5  
6  
7  
8  
9  
10  
11  
12  
13  
14  
15  
16  
17  
18  
19  
20  
21  
22  
23  
24  
25  
26  
27  
28  
29  
30  
31  
32  
33  
34  
35  
36  
37  
38  
39  
40  
41  
42  
43  
44  
45  
46

|         |      |          |          |
|---------|------|----------|----------|
| Fiji    | 2001 | 0.674743 | 0.523954 |
| Fiji    | 2002 | 0.714503 | 0.533768 |
| Fiji    | 2003 | 0.766211 | 0.56517  |
| Fiji    | 2004 | 0.772718 | 0.564366 |
| Fiji    | 2005 | 0.738173 | 0.546633 |
| Fiji    | 2006 | 0.729158 | 0.534349 |
| Fiji    | 2007 | 0.744471 | 0.528667 |
| Fiji    | 2008 | 0.779592 | 0.571697 |
| Fiji    | 2009 | 0.799191 | 0.589837 |
| Fiji    | 2010 | 0.774052 | 0.569211 |
| Fiji    | 2011 | 0.744256 | 0.551047 |
| Fiji    | 2012 | 0.721319 | 0.541473 |
| Fiji    | 2013 | 0.719478 | 0.54105  |
| Fiji    | 2014 | 0.721526 | 0.53809  |
| Fiji    | 2015 | 0.728084 | 0.540392 |
| Fiji    | 2016 | 0.734806 | 0.543516 |
| Fiji    | 2017 | 0.741654 | 0.545391 |
| Fiji    | 2018 | 0.748133 | 0.547693 |
| Fiji    | 2019 | 0.754193 | 0.549577 |
| Finland | 1990 | 1.369762 | 0.651588 |
| Finland | 1991 | 1.404089 | 0.664806 |
| Finland | 1992 | 1.447397 | 0.683359 |
| Finland | 1993 | 1.473253 | 0.693502 |
| Finland | 1994 | 1.479108 | 0.699452 |
| Finland | 1995 | 1.437902 | 0.685172 |

|    |         |      |          |          |
|----|---------|------|----------|----------|
| 1  |         |      |          |          |
| 2  |         |      |          |          |
| 3  |         |      |          |          |
| 4  |         |      |          |          |
| 5  | Finland | 1996 | 1.4051   | 0.675676 |
| 6  | Finland | 1997 | 1.369332 | 0.663419 |
| 7  | Finland | 1998 | 1.273109 | 0.620794 |
| 8  | Finland | 1999 | 1.23956  | 0.605483 |
| 9  | Finland | 2000 | 1.255896 | 0.613356 |
| 10 | Finland | 2001 | 1.225525 | 0.599665 |
| 11 | Finland | 2002 | 1.211362 | 0.593411 |
| 12 | Finland | 2003 | 1.235058 | 0.606439 |
| 13 | Finland | 2004 | 1.240611 | 0.615839 |
| 14 | Finland | 2005 | 1.268837 | 0.630773 |
| 15 | Finland | 2006 | 1.315871 | 0.655994 |
| 16 | Finland | 2007 | 1.334793 | 0.667858 |
| 17 | Finland | 2008 | 1.346856 | 0.675729 |
| 18 | Finland | 2009 | 1.349785 | 0.681902 |
| 19 | Finland | 2010 | 1.368822 | 0.693519 |
| 20 | Finland | 2011 | 1.41426  | 0.719419 |
| 21 | Finland | 2012 | 1.442101 | 0.737073 |
| 22 | Finland | 2013 | 1.456253 | 0.75094  |
| 23 | Finland | 2014 | 1.463376 | 0.761748 |
| 24 | Finland | 2015 | 1.504316 | 0.790889 |
| 25 | Finland | 2016 | 1.486986 | 0.792614 |
| 26 | Finland | 2017 | 1.435595 | 0.779339 |
| 27 | Finland | 2018 | 1.41599  | 0.781929 |
| 28 | Finland | 2019 | 1.386159 | 0.777876 |
| 29 | France  | 1990 | 1.124202 | 0.523527 |
| 30 |         |      |          |          |
| 31 |         |      |          |          |
| 32 |         |      |          |          |
| 33 |         |      |          |          |
| 34 |         |      |          |          |
| 35 |         |      |          |          |
| 36 |         |      |          |          |
| 37 |         |      |          |          |
| 38 |         |      |          |          |
| 39 |         |      |          |          |
| 40 |         |      |          |          |
| 41 |         |      |          |          |
| 42 |         |      |          |          |
| 43 |         |      |          |          |
| 44 |         |      |          |          |
| 45 |         |      |          |          |
| 46 |         |      |          |          |



1  
2  
3  
4  
5  
6  
7  
8  
9  
10  
11  
12  
13  
14  
15  
16  
17  
18  
19  
20  
21  
22  
23  
24  
25  
26  
27  
28  
29  
30  
31  
32  
33  
34  
35  
36  
37  
38  
39  
40  
41  
42  
43  
44  
45  
46

|        |      |          |          |
|--------|------|----------|----------|
| France | 1991 | 1.122316 | 0.524504 |
| France | 1992 | 1.12034  | 0.524787 |
| France | 1993 | 1.117802 | 0.526191 |
| France | 1994 | 1.118268 | 0.528797 |
| France | 1995 | 1.112993 | 0.527024 |
| France | 1996 | 1.101909 | 0.522307 |
| France | 1997 | 1.105504 | 0.522596 |
| France | 1998 | 1.107177 | 0.530535 |
| France | 1999 | 1.10903  | 0.534938 |
| France | 2000 | 1.107854 | 0.537168 |
| France | 2001 | 1.110105 | 0.543565 |
| France | 2002 | 1.102    | 0.545481 |
| France | 2003 | 1.084393 | 0.542172 |
| France | 2004 | 1.077414 | 0.54228  |
| France | 2005 | 1.06193  | 0.535116 |
| France | 2006 | 1.067723 | 0.539183 |
| France | 2007 | 1.075779 | 0.545688 |
| France | 2008 | 1.090466 | 0.555471 |
| France | 2009 | 1.07957  | 0.551918 |
| France | 2010 | 1.086085 | 0.553398 |
| France | 2011 | 1.095191 | 0.55705  |
| France | 2012 | 1.104754 | 0.562202 |
| France | 2013 | 1.102879 | 0.564467 |
| France | 2014 | 1.10743  | 0.570799 |
| France | 2015 | 1.089102 | 0.563704 |

|        |      |          |          |
|--------|------|----------|----------|
| France | 2016 | 1.076047 | 0.555978 |
| France | 2017 | 1.062053 | 0.548646 |
| France | 2018 | 1.078987 | 0.558974 |
| France | 2019 | 1.072237 | 0.558669 |
| Gabon  | 1990 | 0.663018 | 0.510695 |
| Gabon  | 1991 | 0.671655 | 0.519702 |
| Gabon  | 1992 | 0.671388 | 0.52192  |
| Gabon  | 1993 | 0.685336 | 0.532449 |
| Gabon  | 1994 | 0.707166 | 0.549661 |
| Gabon  | 1995 | 0.711069 | 0.555824 |
| Gabon  | 1996 | 0.747609 | 0.582971 |
| Gabon  | 1997 | 0.769173 | 0.598567 |
| Gabon  | 1998 | 0.796265 | 0.617671 |
| Gabon  | 1999 | 0.831864 | 0.641644 |
| Gabon  | 2000 | 0.848369 | 0.653986 |
| Gabon  | 2001 | 0.876541 | 0.676621 |
| Gabon  | 2002 | 0.887885 | 0.685029 |
| Gabon  | 2003 | 0.917659 | 0.709144 |
| Gabon  | 2004 | 0.940511 | 0.72639  |
| Gabon  | 2005 | 0.941471 | 0.727273 |
| Gabon  | 2006 | 0.957229 | 0.739157 |
| Gabon  | 2007 | 0.939534 | 0.730543 |
| Gabon  | 2008 | 0.943992 | 0.736346 |
| Gabon  | 2009 | 0.937137 | 0.731371 |
| Gabon  | 2010 | 0.928266 | 0.72189  |

|    |        |      |          |          |
|----|--------|------|----------|----------|
| 5  | Gabon  | 2011 | 0.931747 | 0.725053 |
| 6  | Gabon  | 2012 | 0.920242 | 0.718091 |
| 7  | Gabon  | 2013 | 0.907997 | 0.709801 |
| 8  | Gabon  | 2014 | 0.913089 | 0.712937 |
| 9  | Gabon  | 2015 | 0.921649 | 0.71807  |
| 10 | Gabon  | 2016 | 0.920729 | 0.721385 |
| 11 | Gabon  | 2017 | 0.921713 | 0.725495 |
| 12 | Gabon  | 2018 | 0.922917 | 0.729617 |
| 13 | Gabon  | 2019 | 0.923103 | 0.73276  |
| 14 | Gambia | 1990 | 0.755805 | 0.755747 |
| 15 | Gambia | 1991 | 0.756823 | 0.756088 |
| 16 | Gambia | 1992 | 0.758184 | 0.75924  |
| 17 | Gambia | 1993 | 0.758936 | 0.757261 |
| 18 | Gambia | 1994 | 0.755326 | 0.750572 |
| 19 | Gambia | 1995 | 0.753686 | 0.753222 |
| 20 | Gambia | 1996 | 0.751364 | 0.743599 |
| 21 | Gambia | 1997 | 0.749738 | 0.739091 |
| 22 | Gambia | 1998 | 0.750354 | 0.73916  |
| 23 | Gambia | 1999 | 0.743484 | 0.732456 |
| 24 | Gambia | 2000 | 0.74646  | 0.72468  |
| 25 | Gambia | 2001 | 0.746679 | 0.717698 |
| 26 | Gambia | 2002 | 0.747766 | 0.711503 |
| 27 | Gambia | 2003 | 0.752355 | 0.712861 |
| 28 | Gambia | 2004 | 0.755842 | 0.713817 |
| 29 | Gambia | 2005 | 0.755955 | 0.71042  |

|         |      |          |          |
|---------|------|----------|----------|
| Gambia  | 2006 | 0.757416 | 0.705952 |
| Gambia  | 2007 | 0.75523  | 0.700773 |
| Gambia  | 2008 | 0.754458 | 0.692666 |
| Gambia  | 2009 | 0.752537 | 0.689476 |
| Gambia  | 2010 | 0.753068 | 0.686471 |
| Gambia  | 2011 | 0.755772 | 0.679598 |
| Gambia  | 2012 | 0.759236 | 0.680795 |
| Gambia  | 2013 | 0.756697 | 0.679521 |
| Gambia  | 2014 | 0.763619 | 0.690755 |
| Gambia  | 2015 | 0.769482 | 0.692325 |
| Gambia  | 2016 | 0.773885 | 0.699811 |
| Gambia  | 2017 | 0.778738 | 0.706126 |
| Gambia  | 2018 | 0.781179 | 0.70658  |
| Gambia  | 2019 | 0.783745 | 0.708702 |
| Georgia | 1990 | 0.890262 | 0.542133 |
| Georgia | 1991 | 0.872831 | 0.536789 |
| Georgia | 1992 | 0.850246 | 0.525619 |
| Georgia | 1993 | 0.863035 | 0.531854 |
| Georgia | 1994 | 0.862277 | 0.535854 |
| Georgia | 1995 | 0.840688 | 0.527101 |
| Georgia | 1996 | 0.842497 | 0.532042 |
| Georgia | 1997 | 0.82724  | 0.521857 |
| Georgia | 1998 | 0.793438 | 0.501139 |
| Georgia | 1999 | 0.801938 | 0.500857 |
| Georgia | 2000 | 0.879865 | 0.543389 |

|         |      |          |          |
|---------|------|----------|----------|
| Georgia | 2001 | 0.899387 | 0.565607 |
| Georgia | 2002 | 0.884306 | 0.551759 |
| Georgia | 2003 | 0.910865 | 0.563177 |
| Georgia | 2004 | 0.933848 | 0.577696 |
| Georgia | 2005 | 0.978952 | 0.607314 |
| Georgia | 2006 | 0.962763 | 0.605212 |
| Georgia | 2007 | 0.930799 | 0.599638 |
| Georgia | 2008 | 0.915016 | 0.592516 |
| Georgia | 2009 | 0.943313 | 0.605152 |
| Georgia | 2010 | 0.947623 | 0.596383 |
| Georgia | 2011 | 0.95614  | 0.599604 |
| Georgia | 2012 | 0.978096 | 0.606573 |
| Georgia | 2013 | 1.014494 | 0.623579 |
| Georgia | 2014 | 0.991503 | 0.604425 |
| Georgia | 2015 | 0.965315 | 0.584449 |
| Georgia | 2016 | 0.950849 | 0.575343 |
| Georgia | 2017 | 0.947486 | 0.573143 |
| Georgia | 2018 | 0.940168 | 0.571439 |
| Georgia | 2019 | 0.93624  | 0.569532 |
| Germany | 1990 | 1.487969 | 0.738576 |
| Germany | 1991 | 1.466275 | 0.722103 |
| Germany | 1992 | 1.461023 | 0.715904 |
| Germany | 1993 | 1.449296 | 0.70554  |
| Germany | 1994 | 1.444447 | 0.697681 |
| Germany | 1995 | 1.444922 | 0.689009 |

|         |      |          |          |
|---------|------|----------|----------|
| Germany | 1996 | 1.453565 | 0.686347 |
| Germany | 1997 | 1.483836 | 0.696893 |
| Germany | 1998 | 1.514594 | 0.710752 |
| Germany | 1999 | 1.533725 | 0.718637 |
| Germany | 2000 | 1.553591 | 0.722254 |
| Germany | 2001 | 1.573124 | 0.730431 |
| Germany | 2002 | 1.582824 | 0.736649 |
| Germany | 2003 | 1.574148 | 0.73842  |
| Germany | 2004 | 1.599898 | 0.756378 |
| Germany | 2005 | 1.612897 | 0.768233 |
| Germany | 2006 | 1.602888 | 0.772032 |
| Germany | 2007 | 1.593446 | 0.782936 |
| Germany | 2008 | 1.578264 | 0.792426 |
| Germany | 2009 | 1.556308 | 0.796146 |
| Germany | 2010 | 1.52725  | 0.787571 |
| Germany | 2011 | 1.537922 | 0.783764 |
| Germany | 2012 | 1.527116 | 0.781158 |
| Germany | 2013 | 1.517234 | 0.781468 |
| Germany | 2014 | 1.517122 | 0.78274  |
| Germany | 2015 | 1.509834 | 0.785566 |
| Germany | 2016 | 1.518061 | 0.798449 |
| Germany | 2017 | 1.476666 | 0.804041 |
| Germany | 2018 | 1.444126 | 0.80565  |
| Germany | 2019 | 1.416778 | 0.808654 |
| Ghana   | 1990 | 1.389388 | 1.181071 |

1  
2  
3  
4  
5  
6  
7  
8  
9  
10  
11  
12  
13  
14  
15  
16  
17  
18  
19  
20  
21  
22  
23  
24  
25  
26  
27  
28  
29  
30  
31  
32  
33  
34  
35  
36  
37  
38  
39  
40  
41  
42  
43  
44  
45  
46

|       |      |          |          |
|-------|------|----------|----------|
| Ghana | 1991 | 1.395297 | 1.186086 |
| Ghana | 1992 | 1.406856 | 1.198388 |
| Ghana | 1993 | 1.408088 | 1.203505 |
| Ghana | 1994 | 1.396314 | 1.196408 |
| Ghana | 1995 | 1.382803 | 1.186929 |
| Ghana | 1996 | 1.372057 | 1.179342 |
| Ghana | 1997 | 1.34008  | 1.155532 |
| Ghana | 1998 | 1.304774 | 1.127515 |
| Ghana | 1999 | 1.250913 | 1.082697 |
| Ghana | 2000 | 1.228704 | 1.061556 |
| Ghana | 2001 | 1.221506 | 1.049951 |
| Ghana | 2002 | 1.201741 | 1.027726 |
| Ghana | 2003 | 1.174967 | 1.001459 |
| Ghana | 2004 | 1.13319  | 0.962102 |
| Ghana | 2005 | 1.104291 | 0.932732 |
| Ghana | 2006 | 1.079481 | 0.906283 |
| Ghana | 2007 | 1.070195 | 0.892958 |
| Ghana | 2008 | 1.057559 | 0.875779 |
| Ghana | 2009 | 1.052341 | 0.864954 |
| Ghana | 2010 | 1.05498  | 0.860277 |
| Ghana | 2011 | 1.049814 | 0.85044  |
| Ghana | 2012 | 1.043791 | 0.839396 |
| Ghana | 2013 | 1.043172 | 0.832323 |
| Ghana | 2014 | 1.057851 | 0.837805 |
| Ghana | 2015 | 1.068515 | 0.839101 |

|    |        |      |          |          |
|----|--------|------|----------|----------|
| 1  |        |      |          |          |
| 2  |        |      |          |          |
| 3  |        |      |          |          |
| 4  |        |      |          |          |
| 5  | Ghana  | 2016 | 1.087431 | 0.848637 |
| 6  | Ghana  | 2017 | 1.108864 | 0.860005 |
| 7  | Ghana  | 2018 | 1.125883 | 0.868676 |
| 8  | Ghana  | 2019 | 1.142967 | 0.877856 |
| 9  |        |      |          |          |
| 10 | Greece | 1990 | 1.161016 | 0.870098 |
| 11 | Greece | 1991 | 1.167773 | 0.882825 |
| 12 | Greece | 1992 | 1.161076 | 0.883274 |
| 13 | Greece | 1993 | 1.161909 | 0.888873 |
| 14 | Greece | 1994 | 1.167579 | 0.899013 |
| 15 | Greece | 1995 | 1.161049 | 0.897684 |
| 16 | Greece | 1996 | 1.147164 | 0.891019 |
| 17 | Greece | 1997 | 1.144252 | 0.892744 |
| 18 | Greece | 1998 | 1.149091 | 0.900029 |
| 19 | Greece | 1999 | 1.119722 | 0.880614 |
| 20 | Greece | 2000 | 1.101564 | 0.871094 |
| 21 | Greece | 2001 | 1.115135 | 0.886731 |
| 22 | Greece | 2002 | 1.140613 | 0.916072 |
| 23 | Greece | 2003 | 1.15732  | 0.940811 |
| 24 | Greece | 2004 | 1.159749 | 0.955428 |
| 25 | Greece | 2005 | 1.163923 | 0.972318 |
| 26 | Greece | 2006 | 1.182637 | 0.993248 |
| 27 | Greece | 2007 | 1.175831 | 0.97592  |
| 28 | Greece | 2008 | 1.190464 | 0.969062 |
| 29 | Greece | 2009 | 1.153453 | 0.941996 |
| 30 | Greece | 2010 | 1.136643 | 0.928388 |
| 31 |        |      |          |          |
| 32 |        |      |          |          |
| 33 |        |      |          |          |
| 34 |        |      |          |          |
| 35 |        |      |          |          |
| 36 |        |      |          |          |
| 37 |        |      |          |          |
| 38 |        |      |          |          |
| 39 |        |      |          |          |
| 40 |        |      |          |          |
| 41 |        |      |          |          |
| 42 |        |      |          |          |
| 43 |        |      |          |          |
| 44 |        |      |          |          |
| 45 |        |      |          |          |
| 46 |        |      |          |          |



1  
2  
3  
4  
5  
6  
7  
8  
9  
10  
11  
12  
13  
14  
15  
16  
17  
18  
19  
20  
21  
22  
23  
24  
25  
26  
27  
28  
29  
30  
31  
32  
33  
34  
35  
36  
37  
38  
39  
40  
41  
42  
43  
44  
45  
46

|           |      |          |          |
|-----------|------|----------|----------|
| Greece    | 2011 | 1.105891 | 0.892206 |
| Greece    | 2012 | 1.086592 | 0.867041 |
| Greece    | 2013 | 1.079777 | 0.850836 |
| Greece    | 2014 | 1.04619  | 0.814348 |
| Greece    | 2015 | 1.030625 | 0.789385 |
| Greece    | 2016 | 1.028167 | 0.775855 |
| Greece    | 2017 | 1.037304 | 0.773643 |
| Greece    | 2018 | 1.091329 | 0.802598 |
| Greece    | 2019 | 1.105053 | 0.80773  |
| Greenland | 1990 | 0.849346 | 0.693694 |
| Greenland | 1991 | 0.859043 | 0.699506 |
| Greenland | 1992 | 0.874645 | 0.708875 |
| Greenland | 1993 | 1.013236 | 0.83206  |
| Greenland | 1994 | 1.037787 | 0.873406 |
| Greenland | 1995 | 1.033608 | 0.886208 |
| Greenland | 1996 | 1.060839 | 0.925261 |
| Greenland | 1997 | 1.091328 | 0.971297 |
| Greenland | 1998 | 1.046899 | 0.961443 |
| Greenland | 1999 | 0.997845 | 0.942449 |
| Greenland | 2000 | 0.94211  | 0.901702 |
| Greenland | 2001 | 0.936488 | 0.907813 |
| Greenland | 2002 | 0.927296 | 0.904154 |
| Greenland | 2003 | 0.835465 | 0.819147 |
| Greenland | 2004 | 0.69175  | 0.688599 |
| Greenland | 2005 | 0.709612 | 0.700803 |

|           |      |          |          |
|-----------|------|----------|----------|
| Greenland | 2006 | 0.706598 | 0.692802 |
| Greenland | 2007 | 0.705793 | 0.686308 |
| Greenland | 2008 | 0.700539 | 0.680087 |
| Greenland | 2009 | 0.683503 | 0.668978 |
| Greenland | 2010 | 0.672699 | 0.652435 |
| Greenland | 2011 | 0.660619 | 0.635534 |
| Greenland | 2012 | 0.635943 | 0.609095 |
| Greenland | 2013 | 0.625224 | 0.595312 |
| Greenland | 2014 | 0.621571 | 0.594696 |
| Greenland | 2015 | 0.622625 | 0.590524 |
| Greenland | 2016 | 0.63024  | 0.59461  |
| Greenland | 2017 | 0.631927 | 0.596305 |
| Greenland | 2018 | 0.636475 | 0.598319 |
| Greenland | 2019 | 0.633015 | 0.600239 |
| Grenada   | 1990 | 0.797821 | 0.554947 |
| Grenada   | 1991 | 0.791908 | 0.547582 |
| Grenada   | 1992 | 0.797965 | 0.545611 |
| Grenada   | 1993 | 0.866844 | 0.585903 |
| Grenada   | 1994 | 0.868726 | 0.585653 |
| Grenada   | 1995 | 0.866269 | 0.584739 |
| Grenada   | 1996 | 0.831677 | 0.564078 |
| Grenada   | 1997 | 0.811707 | 0.552665 |
| Grenada   | 1998 | 0.799312 | 0.544226 |
| Grenada   | 1999 | 0.688282 | 0.455645 |
| Grenada   | 2000 | 0.68774  | 0.439827 |

1  
2  
3  
4  
5  
6  
7  
8  
9  
10  
11  
12  
13  
14  
15  
16  
17  
18  
19  
20  
21  
22  
23  
24  
25  
26  
27  
28  
29  
30  
31  
32  
33  
34  
35  
36  
37  
38  
39  
40  
41  
42  
43  
44  
45  
46

|         |      |          |          |
|---------|------|----------|----------|
| Grenada | 2001 | 0.702495 | 0.43759  |
| Grenada | 2002 | 0.711655 | 0.432377 |
| Grenada | 2003 | 0.71962  | 0.428494 |
| Grenada | 2004 | 0.732755 | 0.430247 |
| Grenada | 2005 | 0.760413 | 0.437206 |
| Grenada | 2006 | 0.78936  | 0.443967 |
| Grenada | 2007 | 0.822661 | 0.462776 |
| Grenada | 2008 | 0.842693 | 0.483301 |
| Grenada | 2009 | 0.882412 | 0.508339 |
| Grenada | 2010 | 0.903844 | 0.527307 |
| Grenada | 2011 | 0.928404 | 0.573847 |
| Grenada | 2012 | 1.001204 | 0.718206 |
| Grenada | 2013 | 0.981917 | 0.7194   |
| Grenada | 2014 | 0.951772 | 0.711073 |
| Grenada | 2015 | 0.919374 | 0.703207 |
| Grenada | 2016 | 0.859129 | 0.659112 |
| Grenada | 2017 | 0.835568 | 0.652602 |
| Grenada | 2018 | 0.826236 | 0.657412 |
| Grenada | 2019 | 0.810856 | 0.655619 |
| Guam    | 1990 | 1.204419 | 1.189679 |
| Guam    | 1991 | 1.208766 | 1.188058 |
| Guam    | 1992 | 1.195287 | 1.167342 |
| Guam    | 1993 | 1.16717  | 1.105228 |
| Guam    | 1994 | 1.107875 | 1.004316 |
| Guam    | 1995 | 1.172072 | 1.084015 |

|           |      |          |          |
|-----------|------|----------|----------|
| Guam      | 1996 | 1.186921 | 1.127987 |
| Guam      | 1997 | 1.133647 | 1.085355 |
| Guam      | 1998 | 1.1296   | 1.075936 |
| Guam      | 1999 | 1.158874 | 1.091652 |
| Guam      | 2000 | 1.174389 | 1.100938 |
| Guam      | 2001 | 1.203948 | 1.136096 |
| Guam      | 2002 | 1.200842 | 1.132682 |
| Guam      | 2003 | 1.238955 | 1.160038 |
| Guam      | 2004 | 1.113806 | 1.021279 |
| Guam      | 2005 | 0.964523 | 0.850896 |
| Guam      | 2006 | 0.944381 | 0.819772 |
| Guam      | 2007 | 0.929106 | 0.797947 |
| Guam      | 2008 | 0.923572 | 0.78604  |
| Guam      | 2009 | 0.931624 | 0.788499 |
| Guam      | 2010 | 0.940753 | 0.797387 |
| Guam      | 2011 | 0.956968 | 0.812158 |
| Guam      | 2012 | 0.983131 | 0.836726 |
| Guam      | 2013 | 1.004146 | 0.860112 |
| Guam      | 2014 | 1.001106 | 0.863148 |
| Guam      | 2015 | 1.003953 | 0.86564  |
| Guam      | 2016 | 0.994553 | 0.85511  |
| Guam      | 2017 | 1.009881 | 0.866865 |
| Guam      | 2018 | 1.025338 | 0.885139 |
| Guam      | 2019 | 1.062923 | 0.918484 |
| Guatemala | 1990 | 0.953023 | 0.953895 |

|           |      |          |          |
|-----------|------|----------|----------|
| Guatemala | 1991 | 0.933729 | 0.929254 |
| Guatemala | 1992 | 0.92926  | 0.918512 |
| Guatemala | 1993 | 0.914013 | 0.90221  |
| Guatemala | 1994 | 0.896312 | 0.885135 |
| Guatemala | 1995 | 0.890006 | 0.871973 |
| Guatemala | 1996 | 0.901921 | 0.86863  |
| Guatemala | 1997 | 0.899852 | 0.857182 |
| Guatemala | 1998 | 0.872046 | 0.812846 |
| Guatemala | 1999 | 0.865173 | 0.791137 |
| Guatemala | 2000 | 0.863256 | 0.781043 |
| Guatemala | 2001 | 0.820782 | 0.743524 |
| Guatemala | 2002 | 0.83644  | 0.740421 |
| Guatemala | 2003 | 0.84415  | 0.738636 |
| Guatemala | 2004 | 0.843046 | 0.720606 |
| Guatemala | 2005 | 0.838576 | 0.707155 |
| Guatemala | 2006 | 0.856915 | 0.71003  |
| Guatemala | 2007 | 0.868494 | 0.712748 |
| Guatemala | 2008 | 0.88503  | 0.714982 |
| Guatemala | 2009 | 0.910003 | 0.728899 |
| Guatemala | 2010 | 0.930968 | 0.739534 |
| Guatemala | 2011 | 0.943079 | 0.746912 |
| Guatemala | 2012 | 0.956022 | 0.754441 |
| Guatemala | 2013 | 0.95592  | 0.752758 |
| Guatemala | 2014 | 0.970023 | 0.757865 |
| Guatemala | 2015 | 0.969041 | 0.752183 |

|               |      |          |          |
|---------------|------|----------|----------|
| Guatemala     | 2016 | 0.983854 | 0.758866 |
| Guatemala     | 2017 | 0.994562 | 0.768067 |
| Guatemala     | 2018 | 0.99077  | 0.763013 |
| Guatemala     | 2019 | 0.995586 | 0.764309 |
| Guinea-Bissau | 1990 | 0.748122 | 0.670412 |
| Guinea-Bissau | 1991 | 0.75664  | 0.671111 |
| Guinea-Bissau | 1992 | 0.764453 | 0.671795 |
| Guinea-Bissau | 1993 | 0.770896 | 0.671429 |
| Guinea-Bissau | 1994 | 0.775841 | 0.67024  |
| Guinea-Bissau | 1995 | 0.778009 | 0.667293 |
| Guinea-Bissau | 1996 | 0.781511 | 0.664792 |
| Guinea-Bissau | 1997 | 0.784534 | 0.662213 |
| Guinea-Bissau | 1998 | 0.781983 | 0.655103 |
| Guinea-Bissau | 1999 | 0.773202 | 0.643304 |
| Guinea-Bissau | 2000 | 0.774928 | 0.639101 |
| Guinea-Bissau | 2001 | 0.769671 | 0.63055  |
| Guinea-Bissau | 2002 | 0.776817 | 0.632411 |
| Guinea-Bissau | 2003 | 0.783424 | 0.634572 |
| Guinea-Bissau | 2004 | 0.781804 | 0.630986 |
| Guinea-Bissau | 2005 | 0.777461 | 0.625183 |
| Guinea-Bissau | 2006 | 0.785814 | 0.629214 |
| Guinea-Bissau | 2007 | 0.790956 | 0.63183  |
| Guinea-Bissau | 2008 | 0.789619 | 0.630173 |
| Guinea-Bissau | 2009 | 0.791031 | 0.630407 |
| Guinea-Bissau | 2010 | 0.788492 | 0.627204 |

1  
2  
3  
4  
5  
6  
7  
8  
9  
10  
11  
12  
13  
14  
15  
16  
17  
18  
19  
20  
21  
22  
23  
24  
25  
26  
27  
28  
29  
30  
31  
32  
33  
34  
35  
36  
37  
38  
39  
40  
41  
42  
43  
44  
45  
46

|               |      |          |          |
|---------------|------|----------|----------|
| Guinea-Bissau | 2011 | 0.780258 | 0.621232 |
| Guinea-Bissau | 2012 | 0.77979  | 0.621828 |
| Guinea-Bissau | 2013 | 0.775523 | 0.619504 |
| Guinea-Bissau | 2014 | 0.781231 | 0.623934 |
| Guinea-Bissau | 2015 | 0.785211 | 0.627208 |
| Guinea-Bissau | 2016 | 0.790123 | 0.632173 |
| Guinea-Bissau | 2017 | 0.794982 | 0.636694 |
| Guinea-Bissau | 2018 | 0.794557 | 0.636869 |
| Guinea-Bissau | 2019 | 0.79691  | 0.639962 |
| Guinea        | 1990 | 1.106482 | 1.06805  |
| Guinea        | 1991 | 1.101821 | 1.062402 |
| Guinea        | 1992 | 1.092566 | 1.051668 |
| Guinea        | 1993 | 1.079614 | 1.036735 |
| Guinea        | 1994 | 1.063496 | 1.018359 |
| Guinea        | 1995 | 1.044157 | 0.994427 |
| Guinea        | 1996 | 1.023563 | 0.970226 |
| Guinea        | 1997 | 1.003974 | 0.94782  |
| Guinea        | 1998 | 0.984752 | 0.924564 |
| Guinea        | 1999 | 0.959149 | 0.894479 |
| Guinea        | 2000 | 0.948271 | 0.875656 |
| Guinea        | 2001 | 0.93673  | 0.86105  |
| Guinea        | 2002 | 0.926789 | 0.848561 |
| Guinea        | 2003 | 0.921873 | 0.840532 |
| Guinea        | 2004 | 0.914807 | 0.83004  |
| Guinea        | 2005 | 0.909379 | 0.821056 |

|        |      |          |          |
|--------|------|----------|----------|
| Guinea | 2006 | 0.897855 | 0.809873 |
| Guinea | 2007 | 0.88313  | 0.797058 |
| Guinea | 2008 | 0.8682   | 0.784253 |
| Guinea | 2009 | 0.856308 | 0.774402 |
| Guinea | 2010 | 0.844945 | 0.765219 |
| Guinea | 2011 | 0.838392 | 0.761209 |
| Guinea | 2012 | 0.832401 | 0.75916  |
| Guinea | 2013 | 0.825926 | 0.757267 |
| Guinea | 2014 | 0.825605 | 0.761087 |
| Guinea | 2015 | 0.827532 | 0.766111 |
| Guinea | 2016 | 0.830462 | 0.774096 |
| Guinea | 2017 | 0.833695 | 0.783024 |
| Guinea | 2018 | 0.834033 | 0.789338 |
| Guinea | 2019 | 0.836231 | 0.796133 |
| Guyana | 1990 | 0.804795 | 0.730845 |
| Guyana | 1991 | 0.825743 | 0.745172 |
| Guyana | 1992 | 0.815942 | 0.730925 |
| Guyana | 1993 | 0.815344 | 0.715393 |
| Guyana | 1994 | 0.833385 | 0.730953 |
| Guyana | 1995 | 0.82273  | 0.725093 |
| Guyana | 1996 | 0.826799 | 0.72395  |
| Guyana | 1997 | 0.801758 | 0.710721 |
| Guyana | 1998 | 0.804478 | 0.710939 |
| Guyana | 1999 | 0.816289 | 0.717467 |
| Guyana | 2000 | 0.851078 | 0.75824  |



|        |      |          |          |
|--------|------|----------|----------|
| Guyana | 2001 | 0.856085 | 0.770243 |
| Guyana | 2002 | 0.868114 | 0.792286 |
| Guyana | 2003 | 0.88199  | 0.808553 |
| Guyana | 2004 | 0.881747 | 0.805175 |
| Guyana | 2005 | 0.876973 | 0.799695 |
| Guyana | 2006 | 0.86259  | 0.785305 |
| Guyana | 2007 | 0.871755 | 0.796174 |
| Guyana | 2008 | 0.866064 | 0.79292  |
| Guyana | 2009 | 0.856384 | 0.776095 |
| Guyana | 2010 | 0.870928 | 0.791752 |
| Guyana | 2011 | 0.864618 | 0.787339 |
| Guyana | 2012 | 0.858249 | 0.769835 |
| Guyana | 2013 | 0.868019 | 0.754845 |
| Guyana | 2014 | 0.883459 | 0.756936 |
| Guyana | 2015 | 0.904528 | 0.783773 |
| Guyana | 2016 | 0.909773 | 0.785122 |
| Guyana | 2017 | 0.907778 | 0.779852 |
| Guyana | 2018 | 0.916706 | 0.792253 |
| Guyana | 2019 | 0.917252 | 0.792395 |
| Haiti  | 1990 | 0.848252 | 0.694669 |
| Haiti  | 1991 | 0.851834 | 0.699622 |
| Haiti  | 1992 | 0.858366 | 0.705985 |
| Haiti  | 1993 | 0.868323 | 0.715498 |
| Haiti  | 1994 | 0.889488 | 0.733226 |
| Haiti  | 1995 | 0.884666 | 0.730909 |

|          |      |          |          |
|----------|------|----------|----------|
| Haiti    | 1996 | 0.885902 | 0.73329  |
| Haiti    | 1997 | 0.88977  | 0.737561 |
| Haiti    | 1998 | 0.897728 | 0.746391 |
| Haiti    | 1999 | 0.918178 | 0.763662 |
| Haiti    | 2000 | 0.933843 | 0.777576 |
| Haiti    | 2001 | 0.952387 | 0.793799 |
| Haiti    | 2002 | 0.965378 | 0.805915 |
| Haiti    | 2003 | 0.979128 | 0.818581 |
| Haiti    | 2004 | 0.996137 | 0.833853 |
| Haiti    | 2005 | 1.011615 | 0.848181 |
| Haiti    | 2006 | 1.003287 | 0.843106 |
| Haiti    | 2007 | 0.991817 | 0.835123 |
| Haiti    | 2008 | 0.977956 | 0.825209 |
| Haiti    | 2009 | 0.969319 | 0.818318 |
| Haiti    | 2010 | 0.971384 | 0.814256 |
| Haiti    | 2011 | 0.977353 | 0.812342 |
| Haiti    | 2012 | 0.970589 | 0.807299 |
| Haiti    | 2013 | 0.964412 | 0.801409 |
| Haiti    | 2014 | 0.961933 | 0.797931 |
| Haiti    | 2015 | 0.961316 | 0.795943 |
| Haiti    | 2016 | 0.958705 | 0.793089 |
| Haiti    | 2017 | 0.953425 | 0.7883   |
| Haiti    | 2018 | 0.949688 | 0.78419  |
| Haiti    | 2019 | 0.950462 | 0.784143 |
| Honduras | 1990 | 0.931423 | 0.792876 |

1  
2  
3  
4  
5  
6  
7  
8  
9  
10  
11  
12  
13  
14  
15  
16  
17  
18  
19  
20  
21  
22  
23  
24  
25  
26  
27  
28  
29  
30  
31  
32  
33  
34  
35  
36  
37  
38  
39  
40  
41  
42  
43  
44  
45  
46

|          |      |          |          |
|----------|------|----------|----------|
| Honduras | 1991 | 0.893526 | 0.757388 |
| Honduras | 1992 | 0.98682  | 0.839842 |
| Honduras | 1993 | 0.96852  | 0.824803 |
| Honduras | 1994 | 0.959285 | 0.818048 |
| Honduras | 1995 | 1.132512 | 0.982388 |
| Honduras | 1996 | 1.204171 | 1.080562 |
| Honduras | 1997 | 1.196654 | 1.084657 |
| Honduras | 1998 | 1.188782 | 1.087144 |
| Honduras | 1999 | 1.177838 | 1.086961 |
| Honduras | 2000 | 1.167179 | 1.085797 |
| Honduras | 2001 | 1.166044 | 1.09074  |
| Honduras | 2002 | 1.190753 | 1.118393 |
| Honduras | 2003 | 1.220312 | 1.149288 |
| Honduras | 2004 | 1.21409  | 1.147758 |
| Honduras | 2005 | 1.210856 | 1.145859 |
| Honduras | 2006 | 1.206554 | 1.142104 |
| Honduras | 2007 | 1.201772 | 1.137077 |
| Honduras | 2008 | 1.193002 | 1.129034 |
| Honduras | 2009 | 1.17622  | 1.114785 |
| Honduras | 2010 | 1.158652 | 1.099057 |
| Honduras | 2011 | 1.132415 | 1.071005 |
| Honduras | 2012 | 1.049605 | 0.966428 |
| Honduras | 2013 | 1.061289 | 0.964852 |
| Honduras | 2014 | 1.072882 | 0.964053 |
| Honduras | 2015 | 1.084842 | 0.9635   |

|          |      |          |          |
|----------|------|----------|----------|
| Honduras | 2016 | 1.097255 | 0.964191 |
| Honduras | 2017 | 1.113633 | 0.969835 |
| Honduras | 2018 | 1.133398 | 0.979179 |
| Honduras | 2019 | 1.150707 | 0.987235 |
| Hungary  | 1990 | 1.248905 | 0.783216 |
| Hungary  | 1991 | 1.273197 | 0.788897 |
| Hungary  | 1992 | 1.235009 | 0.764683 |
| Hungary  | 1993 | 1.231176 | 0.75623  |
| Hungary  | 1994 | 1.207315 | 0.733594 |
| Hungary  | 1995 | 1.224856 | 0.735564 |
| Hungary  | 1996 | 1.257931 | 0.743862 |
| Hungary  | 1997 | 1.308379 | 0.767016 |
| Hungary  | 1998 | 1.328475 | 0.772198 |
| Hungary  | 1999 | 1.338323 | 0.77329  |
| Hungary  | 2000 | 1.35984  | 0.776331 |
| Hungary  | 2001 | 1.359909 | 0.773614 |
| Hungary  | 2002 | 1.345923 | 0.763105 |
| Hungary  | 2003 | 1.355023 | 0.763996 |
| Hungary  | 2004 | 1.373922 | 0.770584 |
| Hungary  | 2005 | 1.367215 | 0.760508 |
| Hungary  | 2006 | 1.414381 | 0.777394 |
| Hungary  | 2007 | 1.476528 | 0.803333 |
| Hungary  | 2008 | 1.536635 | 0.823527 |
| Hungary  | 2009 | 1.559169 | 0.826695 |
| Hungary  | 2010 | 1.632679 | 0.854821 |

|         |      |          |          |
|---------|------|----------|----------|
| Hungary | 2011 | 1.687514 | 0.88035  |
| Hungary | 2012 | 1.701139 | 0.882161 |
| Hungary | 2013 | 1.757902 | 0.906339 |
| Hungary | 2014 | 1.755502 | 0.906485 |
| Hungary | 2015 | 1.78418  | 0.922637 |
| Hungary | 2016 | 1.735478 | 0.893355 |
| Hungary | 2017 | 1.75693  | 0.901822 |
| Hungary | 2018 | 1.744163 | 0.896852 |
| Hungary | 2019 | 1.776262 | 0.914186 |
| Iceland | 1990 | 0.893067 | 0.617346 |
| Iceland | 1991 | 0.898833 | 0.619624 |
| Iceland | 1992 | 0.904815 | 0.624484 |
| Iceland | 1993 | 0.906251 | 0.624472 |
| Iceland | 1994 | 0.900378 | 0.620242 |
| Iceland | 1995 | 0.886218 | 0.609419 |
| Iceland | 1996 | 0.865607 | 0.592359 |
| Iceland | 1997 | 0.86581  | 0.590292 |
| Iceland | 1998 | 0.87148  | 0.58898  |
| Iceland | 1999 | 0.88968  | 0.596646 |
| Iceland | 2000 | 0.939133 | 0.627518 |
| Iceland | 2001 | 0.946968 | 0.636139 |
| Iceland | 2002 | 0.918585 | 0.619865 |
| Iceland | 2003 | 0.932633 | 0.628488 |
| Iceland | 2004 | 0.943794 | 0.63412  |
| Iceland | 2005 | 0.920771 | 0.620702 |

|    |         |      |          |          |
|----|---------|------|----------|----------|
| 1  |         |      |          |          |
| 2  |         |      |          |          |
| 3  |         |      |          |          |
| 4  |         |      |          |          |
| 5  | Iceland | 2006 | 0.875513 | 0.592684 |
| 6  | Iceland | 2007 | 0.828134 | 0.560027 |
| 7  | Iceland | 2008 | 0.813439 | 0.547711 |
| 8  | Iceland | 2009 | 0.797623 | 0.532781 |
| 9  | Iceland | 2010 | 0.792424 | 0.527124 |
| 10 | Iceland | 2011 | 0.797199 | 0.526861 |
| 11 | Iceland | 2012 | 0.781397 | 0.512562 |
| 12 | Iceland | 2013 | 0.816639 | 0.53432  |
| 13 | Iceland | 2014 | 0.891672 | 0.581795 |
| 14 | Iceland | 2015 | 0.868086 | 0.571245 |
| 15 | Iceland | 2016 | 0.841589 | 0.554825 |
| 16 | Iceland | 2017 | 0.799747 | 0.529264 |
| 17 | Iceland | 2018 | 0.791315 | 0.524633 |
| 18 | Iceland | 2019 | 0.793979 | 0.527376 |
| 19 | India   | 1990 | 0.67198  | 0.651392 |
| 20 | India   | 1991 | 0.664991 | 0.649046 |
| 21 | India   | 1992 | 0.677239 | 0.659893 |
| 22 | India   | 1993 | 0.668435 | 0.653609 |
| 23 | India   | 1994 | 0.664197 | 0.64799  |
| 24 | India   | 1995 | 0.665584 | 0.647018 |
| 25 | India   | 1996 | 0.664089 | 0.640755 |
| 26 | India   | 1997 | 0.665254 | 0.640588 |
| 27 | India   | 1998 | 0.672932 | 0.647828 |
| 28 | India   | 1999 | 0.667927 | 0.643606 |
| 29 | India   | 2000 | 0.650053 | 0.62195  |
| 30 |         |      |          |          |
| 31 |         |      |          |          |
| 32 |         |      |          |          |
| 33 |         |      |          |          |
| 34 |         |      |          |          |
| 35 |         |      |          |          |
| 36 |         |      |          |          |
| 37 |         |      |          |          |
| 38 |         |      |          |          |
| 39 |         |      |          |          |
| 40 |         |      |          |          |
| 41 |         |      |          |          |
| 42 |         |      |          |          |
| 43 |         |      |          |          |
| 44 |         |      |          |          |
| 45 |         |      |          |          |
| 46 |         |      |          |          |

1  
2  
3  
4  
5  
6  
7  
8  
9  
10  
11  
12  
13  
14  
15  
16  
17  
18  
19  
20  
21  
22  
23  
24  
25  
26  
27  
28  
29  
30  
31  
32  
33  
34  
35  
36  
37  
38  
39  
40  
41  
42  
43  
44  
45  
46

|           |      |          |          |
|-----------|------|----------|----------|
| India     | 2001 | 0.648807 | 0.6203   |
| India     | 2002 | 0.645959 | 0.616526 |
| India     | 2003 | 0.627599 | 0.596667 |
| India     | 2004 | 0.61961  | 0.587071 |
| India     | 2005 | 0.617428 | 0.584254 |
| India     | 2006 | 0.621215 | 0.591136 |
| India     | 2007 | 0.62422  | 0.595923 |
| India     | 2008 | 0.614686 | 0.585389 |
| India     | 2009 | 0.615543 | 0.579393 |
| India     | 2010 | 0.627674 | 0.58403  |
| India     | 2011 | 0.631651 | 0.587956 |
| India     | 2012 | 0.643951 | 0.600207 |
| India     | 2013 | 0.668672 | 0.612078 |
| India     | 2014 | 0.697766 | 0.627543 |
| India     | 2015 | 0.726946 | 0.655171 |
| India     | 2016 | 0.727723 | 0.661042 |
| India     | 2017 | 0.728097 | 0.663525 |
| India     | 2018 | 0.72818  | 0.659649 |
| India     | 2019 | 0.732114 | 0.664084 |
| Indonesia | 1990 | 0.904475 | 0.805626 |
| Indonesia | 1991 | 0.89592  | 0.79993  |
| Indonesia | 1992 | 0.891139 | 0.796224 |
| Indonesia | 1993 | 0.896197 | 0.800503 |
| Indonesia | 1994 | 0.901232 | 0.804676 |
| Indonesia | 1995 | 0.910442 | 0.812309 |

|                            |      |          |          |
|----------------------------|------|----------|----------|
| Indonesia                  | 1996 | 0.920734 | 0.822294 |
| Indonesia                  | 1997 | 0.925581 | 0.826452 |
| Indonesia                  | 1998 | 0.926823 | 0.827526 |
| Indonesia                  | 1999 | 0.927296 | 0.82819  |
| Indonesia                  | 2000 | 0.921737 | 0.824503 |
| Indonesia                  | 2001 | 0.909081 | 0.815638 |
| Indonesia                  | 2002 | 0.901911 | 0.810925 |
| Indonesia                  | 2003 | 0.900123 | 0.810677 |
| Indonesia                  | 2004 | 0.895603 | 0.807667 |
| Indonesia                  | 2005 | 0.891928 | 0.804423 |
| Indonesia                  | 2006 | 0.887582 | 0.802247 |
| Indonesia                  | 2007 | 0.88547  | 0.801573 |
| Indonesia                  | 2008 | 0.871184 | 0.787266 |
| Indonesia                  | 2009 | 0.857157 | 0.773813 |
| Indonesia                  | 2010 | 0.84432  | 0.761141 |
| Indonesia                  | 2011 | 0.825542 | 0.744336 |
| Indonesia                  | 2012 | 0.794104 | 0.715721 |
| Indonesia                  | 2013 | 0.771454 | 0.694276 |
| Indonesia                  | 2014 | 0.746281 | 0.67051  |
| Indonesia                  | 2015 | 0.731324 | 0.656279 |
| Indonesia                  | 2016 | 0.726472 | 0.653465 |
| Indonesia                  | 2017 | 0.727428 | 0.654714 |
| Indonesia                  | 2018 | 0.726543 | 0.654163 |
| Indonesia                  | 2019 | 0.725323 | 0.653072 |
| Iran (Islamic Republic of) | 1990 | 0.846309 | 0.884767 |



|                            |      |          |          |
|----------------------------|------|----------|----------|
| Iran (Islamic Republic of) | 1991 | 0.850062 | 0.895933 |
| Iran (Islamic Republic of) | 1992 | 0.845513 | 0.897431 |
| Iran (Islamic Republic of) | 1993 | 0.850854 | 0.909371 |
| Iran (Islamic Republic of) | 1994 | 0.846549 | 0.911123 |
| Iran (Islamic Republic of) | 1995 | 0.850514 | 0.921504 |
| Iran (Islamic Republic of) | 1996 | 0.865414 | 0.943133 |
| Iran (Islamic Republic of) | 1997 | 0.868181 | 0.951728 |
| Iran (Islamic Republic of) | 1998 | 0.872144 | 0.960851 |
| Iran (Islamic Republic of) | 1999 | 0.866475 | 0.958325 |
| Iran (Islamic Republic of) | 2000 | 0.887477 | 0.985288 |
| Iran (Islamic Republic of) | 2001 | 0.899208 | 1.00184  |
| Iran (Islamic Republic of) | 2002 | 0.886266 | 0.98971  |
| Iran (Islamic Republic of) | 2003 | 0.872632 | 0.974236 |
| Iran (Islamic Republic of) | 2004 | 0.871049 | 0.970715 |
| Iran (Islamic Republic of) | 2005 | 0.871362 | 0.967471 |
| Iran (Islamic Republic of) | 2006 | 0.858624 | 0.948691 |
| Iran (Islamic Republic of) | 2007 | 0.840085 | 0.919136 |
| Iran (Islamic Republic of) | 2008 | 0.829588 | 0.900372 |
| Iran (Islamic Republic of) | 2009 | 0.824816 | 0.888598 |
| Iran (Islamic Republic of) | 2010 | 0.826351 | 0.879267 |
| Iran (Islamic Republic of) | 2011 | 0.825291 | 0.871341 |
| Iran (Islamic Republic of) | 2012 | 0.823102 | 0.865946 |
| Iran (Islamic Republic of) | 2013 | 0.839203 | 0.883214 |
| Iran (Islamic Republic of) | 2014 | 0.858072 | 0.903726 |
| Iran (Islamic Republic of) | 2015 | 0.87411  | 0.919495 |

|    |                            |      |          |          |
|----|----------------------------|------|----------|----------|
| 1  |                            |      |          |          |
| 2  |                            |      |          |          |
| 3  |                            |      |          |          |
| 4  |                            |      |          |          |
| 5  | Iran (Islamic Republic of) | 2016 | 0.89088  | 0.937536 |
| 6  | Iran (Islamic Republic of) | 2017 | 0.901889 | 0.949128 |
| 7  | Iran (Islamic Republic of) | 2018 | 0.906975 | 0.953392 |
| 8  | Iran (Islamic Republic of) | 2019 | 0.915692 | 0.961205 |
| 9  |                            |      |          |          |
| 10 | Iraq                       | 1990 | 1.038715 | 0.921613 |
| 11 | Iraq                       | 1991 | 1.028035 | 0.91066  |
| 12 | Iraq                       | 1992 | 1.015177 | 0.901312 |
| 13 | Iraq                       | 1993 | 0.996418 | 0.884872 |
| 14 | Iraq                       | 1994 | 0.978218 | 0.864977 |
| 15 | Iraq                       | 1995 | 0.970719 | 0.857555 |
| 16 | Iraq                       | 1996 | 0.96171  | 0.847265 |
| 17 | Iraq                       | 1997 | 0.947098 | 0.832703 |
| 18 | Iraq                       | 1998 | 0.932334 | 0.819284 |
| 19 | Iraq                       | 1999 | 0.923562 | 0.811365 |
| 20 | Iraq                       | 2000 | 0.916529 | 0.805188 |
| 21 | Iraq                       | 2001 | 0.912447 | 0.800956 |
| 22 | Iraq                       | 2002 | 0.91232  | 0.799917 |
| 23 | Iraq                       | 2003 | 0.912054 | 0.799067 |
| 24 | Iraq                       | 2004 | 0.919368 | 0.806158 |
| 25 | Iraq                       | 2005 | 0.923599 | 0.808822 |
| 26 | Iraq                       | 2006 | 0.932396 | 0.814381 |
| 27 | Iraq                       | 2007 | 0.932736 | 0.812761 |
| 28 | Iraq                       | 2008 | 0.928361 | 0.808737 |
| 29 | Iraq                       | 2009 | 0.91609  | 0.797203 |
| 30 | Iraq                       | 2010 | 0.898317 | 0.779174 |
| 31 |                            |      |          |          |
| 32 |                            |      |          |          |
| 33 |                            |      |          |          |
| 34 |                            |      |          |          |
| 35 |                            |      |          |          |
| 36 |                            |      |          |          |
| 37 |                            |      |          |          |
| 38 |                            |      |          |          |
| 39 |                            |      |          |          |
| 40 |                            |      |          |          |
| 41 |                            |      |          |          |
| 42 |                            |      |          |          |
| 43 |                            |      |          |          |
| 44 |                            |      |          |          |
| 45 |                            |      |          |          |
| 46 |                            |      |          |          |

|         |      |          |          |
|---------|------|----------|----------|
| Iraq    | 2011 | 0.886643 | 0.769248 |
| Iraq    | 2012 | 0.873397 | 0.75733  |
| Iraq    | 2013 | 0.859141 | 0.744408 |
| Iraq    | 2014 | 0.849341 | 0.734867 |
| Iraq    | 2015 | 0.848791 | 0.733316 |
| Iraq    | 2016 | 0.849734 | 0.733889 |
| Iraq    | 2017 | 0.850296 | 0.733783 |
| Iraq    | 2018 | 0.838897 | 0.725088 |
| Iraq    | 2019 | 0.823535 | 0.707666 |
| Ireland | 1990 | 0.990332 | 0.642532 |
| Ireland | 1991 | 1.01067  | 0.652745 |
| Ireland | 1992 | 1.005023 | 0.645801 |
| Ireland | 1993 | 0.997892 | 0.639265 |
| Ireland | 1994 | 1.016307 | 0.644885 |
| Ireland | 1995 | 1.014649 | 0.636152 |
| Ireland | 1996 | 1.000293 | 0.620096 |
| Ireland | 1997 | 1.020021 | 0.631417 |
| Ireland | 1998 | 1.031917 | 0.637105 |
| Ireland | 1999 | 1.024805 | 0.629057 |
| Ireland | 2000 | 1.008419 | 0.613226 |
| Ireland | 2001 | 1.019148 | 0.611967 |
| Ireland | 2002 | 1.021805 | 0.615345 |
| Ireland | 2003 | 1.021697 | 0.61487  |
| Ireland | 2004 | 1.005065 | 0.60004  |
| Ireland | 2005 | 1.045104 | 0.620705 |

|         |      |          |          |
|---------|------|----------|----------|
| Ireland | 2006 | 1.067788 | 0.636154 |
| Ireland | 2007 | 1.052256 | 0.630424 |
| Ireland | 2008 | 1.038694 | 0.625566 |
| Ireland | 2009 | 1.017066 | 0.619329 |
| Ireland | 2010 | 1.018538 | 0.623428 |
| Ireland | 2011 | 1.012795 | 0.627264 |
| Ireland | 2012 | 0.975791 | 0.606707 |
| Ireland | 2013 | 0.943072 | 0.590724 |
| Ireland | 2014 | 0.941779 | 0.595064 |
| Ireland | 2015 | 0.952201 | 0.609346 |
| Ireland | 2016 | 0.942132 | 0.61169  |
| Ireland | 2017 | 0.933334 | 0.615757 |
| Ireland | 2018 | 0.93453  | 0.626241 |
| Ireland | 2019 | 0.920745 | 0.626484 |
| Israel  | 1990 | 0.94219  | 0.786904 |
| Israel  | 1991 | 0.919965 | 0.762573 |
| Israel  | 1992 | 0.917957 | 0.753597 |
| Israel  | 1993 | 0.919162 | 0.74611  |
| Israel  | 1994 | 0.919964 | 0.740401 |
| Israel  | 1995 | 0.89525  | 0.714392 |
| Israel  | 1996 | 0.885476 | 0.706356 |
| Israel  | 1997 | 0.869098 | 0.688093 |
| Israel  | 1998 | 0.857361 | 0.667378 |
| Israel  | 1999 | 0.855316 | 0.658138 |
| Israel  | 2000 | 0.841052 | 0.644188 |

|    |        |      |          |          |
|----|--------|------|----------|----------|
| 1  |        |      |          |          |
| 2  |        |      |          |          |
| 3  |        |      |          |          |
| 4  |        |      |          |          |
| 5  | Israel | 2001 | 0.848966 | 0.6474   |
| 6  | Israel | 2002 | 0.849254 | 0.644365 |
| 7  | Israel | 2003 | 0.849257 | 0.639475 |
| 8  | Israel | 2004 | 0.858922 | 0.643102 |
| 9  | Israel | 2005 | 0.861348 | 0.642839 |
| 10 | Israel | 2006 | 0.870257 | 0.648499 |
| 11 | Israel | 2007 | 0.877613 | 0.649739 |
| 12 | Israel | 2008 | 0.887024 | 0.649546 |
| 13 | Israel | 2009 | 0.903354 | 0.655117 |
| 14 | Israel | 2010 | 0.894466 | 0.645255 |
| 15 | Israel | 2011 | 0.916316 | 0.659221 |
| 16 | Israel | 2012 | 0.908112 | 0.649691 |
| 17 | Israel | 2013 | 0.919164 | 0.653967 |
| 18 | Israel | 2014 | 0.917547 | 0.649284 |
| 19 | Israel | 2015 | 0.902198 | 0.636174 |
| 20 | Israel | 2016 | 0.931438 | 0.657062 |
| 21 | Israel | 2017 | 0.929475 | 0.656012 |
| 22 | Israel | 2018 | 0.923335 | 0.653248 |
| 23 | Israel | 2019 | 0.923192 | 0.655589 |
| 24 | Italy  | 1990 | 1.090376 | 0.643927 |
| 25 | Italy  | 1991 | 1.081423 | 0.637552 |
| 26 | Italy  | 1992 | 1.078447 | 0.634752 |
| 27 | Italy  | 1993 | 1.088728 | 0.638461 |
| 28 | Italy  | 1994 | 1.092486 | 0.639173 |
| 29 | Italy  | 1995 | 1.104435 | 0.642915 |
| 30 |        |      |          |          |
| 31 |        |      |          |          |
| 32 |        |      |          |          |
| 33 |        |      |          |          |
| 34 |        |      |          |          |
| 35 |        |      |          |          |
| 36 |        |      |          |          |
| 37 |        |      |          |          |
| 38 |        |      |          |          |
| 39 |        |      |          |          |
| 40 |        |      |          |          |
| 41 |        |      |          |          |
| 42 |        |      |          |          |
| 43 |        |      |          |          |
| 44 |        |      |          |          |
| 45 |        |      |          |          |
| 46 |        |      |          |          |

|         |      |          |          |
|---------|------|----------|----------|
| Italy   | 1996 | 1.115154 | 0.644873 |
| Italy   | 1997 | 1.121742 | 0.644068 |
| Italy   | 1998 | 1.130953 | 0.645348 |
| Italy   | 1999 | 1.141682 | 0.646889 |
| Italy   | 2000 | 1.166232 | 0.654341 |
| Italy   | 2001 | 1.182466 | 0.657137 |
| Italy   | 2002 | 1.207321 | 0.66463  |
| Italy   | 2003 | 1.209099 | 0.6605   |
| Italy   | 2004 | 1.216337 | 0.660522 |
| Italy   | 2005 | 1.211844 | 0.651899 |
| Italy   | 2006 | 1.208596 | 0.644847 |
| Italy   | 2007 | 1.210034 | 0.642825 |
| Italy   | 2008 | 1.223902 | 0.648972 |
| Italy   | 2009 | 1.227047 | 0.651423 |
| Italy   | 2010 | 1.241487 | 0.658229 |
| Italy   | 2011 | 1.256087 | 0.66503  |
| Italy   | 2012 | 1.269111 | 0.672045 |
| Italy   | 2013 | 1.262556 | 0.669897 |
| Italy   | 2014 | 1.259651 | 0.670649 |
| Italy   | 2015 | 1.248791 | 0.665998 |
| Italy   | 2016 | 1.241213 | 0.662825 |
| Italy   | 2017 | 1.220767 | 0.657356 |
| Italy   | 2018 | 1.222834 | 0.665099 |
| Italy   | 2019 | 1.210609 | 0.666333 |
| Jamaica | 1990 | 0.636078 | 0.518682 |

|         |      |          |          |
|---------|------|----------|----------|
| Jamaica | 1991 | 0.692646 | 0.56671  |
| Jamaica | 1992 | 0.687608 | 0.56459  |
| Jamaica | 1993 | 0.690036 | 0.566605 |
| Jamaica | 1994 | 0.708948 | 0.583474 |
| Jamaica | 1995 | 0.731778 | 0.602656 |
| Jamaica | 1996 | 0.755209 | 0.621615 |
| Jamaica | 1997 | 0.780986 | 0.641921 |
| Jamaica | 1998 | 0.780952 | 0.642028 |
| Jamaica | 1999 | 0.813121 | 0.665991 |
| Jamaica | 2000 | 0.899106 | 0.732146 |
| Jamaica | 2001 | 0.899379 | 0.732191 |
| Jamaica | 2002 | 0.891943 | 0.735452 |
| Jamaica | 2003 | 0.881381 | 0.726775 |
| Jamaica | 2004 | 0.900935 | 0.744511 |
| Jamaica | 2005 | 0.913895 | 0.76107  |
| Jamaica | 2006 | 0.88166  | 0.736568 |
| Jamaica | 2007 | 0.74946  | 0.632214 |
| Jamaica | 2008 | 0.637378 | 0.539676 |
| Jamaica | 2009 | 0.588224 | 0.494132 |
| Jamaica | 2010 | 0.715381 | 0.601316 |
| Jamaica | 2011 | 0.647498 | 0.544749 |
| Jamaica | 2012 | 0.7813   | 0.660719 |
| Jamaica | 2013 | 0.79124  | 0.671617 |
| Jamaica | 2014 | 0.762489 | 0.646836 |
| Jamaica | 2015 | 0.756701 | 0.64138  |

|         |      |          |          |
|---------|------|----------|----------|
| Jamaica | 2016 | 0.739837 | 0.632018 |
| Jamaica | 2017 | 0.737952 | 0.631909 |
| Jamaica | 2018 | 0.739624 | 0.63439  |
| Jamaica | 2019 | 0.76193  | 0.654431 |
| Japan   | 1990 | 1.071062 | 0.680444 |
| Japan   | 1991 | 1.070475 | 0.67287  |
| Japan   | 1992 | 1.076246 | 0.669168 |
| Japan   | 1993 | 1.085941 | 0.668386 |
| Japan   | 1994 | 1.096482 | 0.668363 |
| Japan   | 1995 | 1.098415 | 0.665185 |
| Japan   | 1996 | 1.116045 | 0.671318 |
| Japan   | 1997 | 1.116951 | 0.666228 |
| Japan   | 1998 | 1.100232 | 0.650244 |
| Japan   | 1999 | 1.085048 | 0.634718 |
| Japan   | 2000 | 1.077853 | 0.623941 |
| Japan   | 2001 | 1.078097 | 0.617512 |
| Japan   | 2002 | 1.081282 | 0.611892 |
| Japan   | 2003 | 1.076595 | 0.602602 |
| Japan   | 2004 | 1.086712 | 0.601979 |
| Japan   | 2005 | 1.079257 | 0.590908 |
| Japan   | 2006 | 1.089796 | 0.590608 |
| Japan   | 2007 | 1.081004 | 0.581309 |
| Japan   | 2008 | 1.068997 | 0.570964 |
| Japan   | 2009 | 1.047886 | 0.557176 |
| Japan   | 2010 | 1.039781 | 0.550218 |



1  
2  
3  
4  
5  
6  
7  
8  
9  
10  
11  
12  
13  
14  
15  
16  
17  
18  
19  
20  
21  
22  
23  
24  
25  
26  
27  
28  
29  
30  
31  
32  
33  
34  
35  
36  
37  
38  
39  
40  
41  
42  
43  
44  
45  
46

|        |      |          |          |
|--------|------|----------|----------|
| Japan  | 2011 | 1.059746 | 0.558397 |
| Japan  | 2012 | 1.071226 | 0.562936 |
| Japan  | 2013 | 1.081946 | 0.568402 |
| Japan  | 2014 | 1.09023  | 0.573894 |
| Japan  | 2015 | 1.09495  | 0.573838 |
| Japan  | 2016 | 1.105279 | 0.578573 |
| Japan  | 2017 | 1.106388 | 0.579657 |
| Japan  | 2018 | 1.120202 | 0.588741 |
| Japan  | 2019 | 1.123565 | 0.592949 |
| Jordan | 1990 | 1.243774 | 1.278353 |
| Jordan | 1991 | 1.271979 | 1.323684 |
| Jordan | 1992 | 1.212918 | 1.282366 |
| Jordan | 1993 | 1.233106 | 1.313997 |
| Jordan | 1994 | 1.211054 | 1.303852 |
| Jordan | 1995 | 1.231809 | 1.332617 |
| Jordan | 1996 | 1.284041 | 1.392659 |
| Jordan | 1997 | 1.287126 | 1.406764 |
| Jordan | 1998 | 1.308754 | 1.439609 |
| Jordan | 1999 | 1.333204 | 1.476799 |
| Jordan | 2000 | 1.358915 | 1.522114 |
| Jordan | 2001 | 1.404458 | 1.596437 |
| Jordan | 2002 | 1.427616 | 1.644192 |
| Jordan | 2003 | 1.421953 | 1.638204 |
| Jordan | 2004 | 1.479769 | 1.729284 |
| Jordan | 2005 | 1.497596 | 1.826894 |

|            |      |          |          |
|------------|------|----------|----------|
| Jordan     | 2006 | 1.443136 | 1.794166 |
| Jordan     | 2007 | 1.234151 | 1.483146 |
| Jordan     | 2008 | 1.106929 | 1.285829 |
| Jordan     | 2009 | 1.019138 | 1.165059 |
| Jordan     | 2010 | 0.948687 | 1.067889 |
| Jordan     | 2011 | 0.940285 | 1.066222 |
| Jordan     | 2012 | 0.951527 | 1.102951 |
| Jordan     | 2013 | 0.966647 | 1.159036 |
| Jordan     | 2014 | 0.973437 | 1.182669 |
| Jordan     | 2015 | 0.936691 | 1.117044 |
| Jordan     | 2016 | 0.952236 | 1.138096 |
| Jordan     | 2017 | 0.970198 | 1.166857 |
| Jordan     | 2018 | 0.973143 | 1.154724 |
| Jordan     | 2019 | 0.982615 | 1.164998 |
| Kazakhstan | 1990 | 0.999933 | 0.671258 |
| Kazakhstan | 1991 | 0.981541 | 0.660741 |
| Kazakhstan | 1992 | 0.97938  | 0.666346 |
| Kazakhstan | 1993 | 0.981365 | 0.670065 |
| Kazakhstan | 1994 | 0.974429 | 0.669119 |
| Kazakhstan | 1995 | 0.950401 | 0.661327 |
| Kazakhstan | 1996 | 0.930785 | 0.656143 |
| Kazakhstan | 1997 | 0.943874 | 0.664252 |
| Kazakhstan | 1998 | 0.935451 | 0.657537 |
| Kazakhstan | 1999 | 0.926939 | 0.650073 |
| Kazakhstan | 2000 | 0.886229 | 0.629965 |

|            |      |          |          |
|------------|------|----------|----------|
| Kazakhstan | 2001 | 0.881548 | 0.629943 |
| Kazakhstan | 2002 | 0.869182 | 0.618695 |
| Kazakhstan | 2003 | 0.840973 | 0.59763  |
| Kazakhstan | 2004 | 0.821565 | 0.586984 |
| Kazakhstan | 2005 | 0.821461 | 0.589292 |
| Kazakhstan | 2006 | 0.811659 | 0.58123  |
| Kazakhstan | 2007 | 0.818429 | 0.578066 |
| Kazakhstan | 2008 | 0.839521 | 0.583216 |
| Kazakhstan | 2009 | 0.85267  | 0.585487 |
| Kazakhstan | 2010 | 0.851782 | 0.57773  |
| Kazakhstan | 2011 | 0.848325 | 0.564973 |
| Kazakhstan | 2012 | 0.849505 | 0.555703 |
| Kazakhstan | 2013 | 0.851565 | 0.5504   |
| Kazakhstan | 2014 | 0.822531 | 0.523314 |
| Kazakhstan | 2015 | 0.844378 | 0.529259 |
| Kazakhstan | 2016 | 0.839327 | 0.522411 |
| Kazakhstan | 2017 | 0.844597 | 0.520727 |
| Kazakhstan | 2018 | 0.828471 | 0.515002 |
| Kazakhstan | 2019 | 0.852281 | 0.536614 |
| Kenya      | 1990 | 0.707017 | 0.669507 |
| Kenya      | 1991 | 0.695049 | 0.65375  |
| Kenya      | 1992 | 0.684015 | 0.637947 |
| Kenya      | 1993 | 0.671695 | 0.620169 |
| Kenya      | 1994 | 0.665955 | 0.607842 |
| Kenya      | 1995 | 0.656889 | 0.59345  |

|          |      |          |          |
|----------|------|----------|----------|
| Kenya    | 1996 | 0.646414 | 0.578509 |
| Kenya    | 1997 | 0.645358 | 0.571636 |
| Kenya    | 1998 | 0.63756  | 0.559602 |
| Kenya    | 1999 | 0.632168 | 0.549598 |
| Kenya    | 2000 | 0.629263 | 0.542961 |
| Kenya    | 2001 | 0.63245  | 0.542569 |
| Kenya    | 2002 | 0.638176 | 0.545642 |
| Kenya    | 2003 | 0.642005 | 0.548332 |
| Kenya    | 2004 | 0.640791 | 0.547412 |
| Kenya    | 2005 | 0.640905 | 0.546741 |
| Kenya    | 2006 | 0.638279 | 0.544025 |
| Kenya    | 2007 | 0.639843 | 0.544383 |
| Kenya    | 2008 | 0.641193 | 0.544797 |
| Kenya    | 2009 | 0.64706  | 0.549628 |
| Kenya    | 2010 | 0.662556 | 0.562322 |
| Kenya    | 2011 | 0.682387 | 0.578683 |
| Kenya    | 2012 | 0.703185 | 0.596299 |
| Kenya    | 2013 | 0.725656 | 0.615121 |
| Kenya    | 2014 | 0.743482 | 0.63115  |
| Kenya    | 2015 | 0.759326 | 0.646749 |
| Kenya    | 2016 | 0.766795 | 0.655746 |
| Kenya    | 2017 | 0.775255 | 0.665895 |
| Kenya    | 2018 | 0.781453 | 0.675112 |
| Kenya    | 2019 | 0.784901 | 0.682011 |
| Kiribati | 1990 | 1.4921   | 1.196769 |

|          |      |          |          |
|----------|------|----------|----------|
| Kiribati | 1991 | 1.456679 | 1.172151 |
| Kiribati | 1992 | 1.426989 | 1.152817 |
| Kiribati | 1993 | 1.399922 | 1.134295 |
| Kiribati | 1994 | 1.379383 | 1.119111 |
| Kiribati | 1995 | 1.357045 | 1.1003   |
| Kiribati | 1996 | 1.342688 | 1.088594 |
| Kiribati | 1997 | 1.337935 | 1.081264 |
| Kiribati | 1998 | 1.335628 | 1.075184 |
| Kiribati | 1999 | 1.338924 | 1.073275 |
| Kiribati | 2000 | 1.334341 | 1.064826 |
| Kiribati | 2001 | 1.330727 | 1.059429 |
| Kiribati | 2002 | 1.334753 | 1.061153 |
| Kiribati | 2003 | 1.344028 | 1.068185 |
| Kiribati | 2004 | 1.360788 | 1.08068  |
| Kiribati | 2005 | 1.358904 | 1.078589 |
| Kiribati | 2006 | 1.337353 | 1.06056  |
| Kiribati | 2007 | 1.308545 | 1.039539 |
| Kiribati | 2008 | 1.284763 | 1.019264 |
| Kiribati | 2009 | 1.261421 | 0.998717 |
| Kiribati | 2010 | 1.244095 | 0.982611 |
| Kiribati | 2011 | 1.224451 | 0.964273 |
| Kiribati | 2012 | 1.203869 | 0.946504 |
| Kiribati | 2013 | 1.187289 | 0.931639 |
| Kiribati | 2014 | 1.173134 | 0.918956 |
| Kiribati | 2015 | 1.174871 | 0.919107 |

|    |          |      |          |          |
|----|----------|------|----------|----------|
| 1  |          |      |          |          |
| 2  |          |      |          |          |
| 3  |          |      |          |          |
| 4  |          |      |          |          |
| 5  | Kiribati | 2016 | 1.184607 | 0.925399 |
| 6  | Kiribati | 2017 | 1.193378 | 0.931678 |
| 7  | Kiribati | 2018 | 1.19579  | 0.933418 |
| 8  | Kiribati | 2019 | 1.197517 | 0.934093 |
| 9  | Kuwait   | 1990 | 0.906022 | 1.255995 |
| 10 | Kuwait   | 1991 | 0.892059 | 1.282196 |
| 11 | Kuwait   | 1992 | 0.885625 | 1.259416 |
| 12 | Kuwait   | 1993 | 0.768031 | 1.079664 |
| 13 | Kuwait   | 1994 | 0.721014 | 1.029666 |
| 14 | Kuwait   | 1995 | 0.703499 | 1.018502 |
| 15 | Kuwait   | 1996 | 0.72527  | 1.063488 |
| 16 | Kuwait   | 1997 | 0.668915 | 1.014207 |
| 17 | Kuwait   | 1998 | 0.704428 | 1.07427  |
| 18 | Kuwait   | 1999 | 0.635082 | 0.968802 |
| 19 | Kuwait   | 2000 | 0.636471 | 0.973544 |
| 20 | Kuwait   | 2001 | 0.77434  | 1.188986 |
| 21 | Kuwait   | 2002 | 0.694942 | 1.096564 |
| 22 | Kuwait   | 2003 | 0.673842 | 1.081392 |
| 23 | Kuwait   | 2004 | 0.653702 | 1.044354 |
| 24 | Kuwait   | 2005 | 0.61209  | 0.973403 |
| 25 | Kuwait   | 2006 | 0.597222 | 0.957241 |
| 26 | Kuwait   | 2007 | 0.649274 | 1.040845 |
| 27 | Kuwait   | 2008 | 0.671105 | 1.096313 |
| 28 | Kuwait   | 2009 | 0.757462 | 1.216108 |
| 29 | Kuwait   | 2010 | 0.839781 | 1.32464  |
| 30 |          |      |          |          |
| 31 |          |      |          |          |
| 32 |          |      |          |          |
| 33 |          |      |          |          |
| 34 |          |      |          |          |
| 35 |          |      |          |          |
| 36 |          |      |          |          |
| 37 |          |      |          |          |
| 38 |          |      |          |          |
| 39 |          |      |          |          |
| 40 |          |      |          |          |
| 41 |          |      |          |          |
| 42 |          |      |          |          |
| 43 |          |      |          |          |
| 44 |          |      |          |          |
| 45 |          |      |          |          |
| 46 |          |      |          |          |

|    |            |      |          |          |
|----|------------|------|----------|----------|
| 1  |            |      |          |          |
| 2  |            |      |          |          |
| 3  |            |      |          |          |
| 4  |            |      |          |          |
| 5  | Kuwait     | 2011 | 0.862705 | 1.35794  |
| 6  | Kuwait     | 2012 | 0.814298 | 1.283671 |
| 7  | Kuwait     | 2013 | 0.814568 | 1.285124 |
| 8  | Kuwait     | 2014 | 0.84126  | 1.300564 |
| 9  | Kuwait     | 2015 | 0.767129 | 1.168468 |
| 10 | Kuwait     | 2016 | 0.739668 | 1.118587 |
| 11 | Kuwait     | 2017 | 0.726698 | 1.081906 |
| 12 | Kuwait     | 2018 | 0.713715 | 1.056145 |
| 13 | Kuwait     | 2019 | 0.723676 | 1.037296 |
| 14 | Kyrgyzstan | 1990 | 0.891951 | 0.672838 |
| 15 | Kyrgyzstan | 1991 | 0.908612 | 0.691176 |
| 16 | Kyrgyzstan | 1992 | 0.898784 | 0.681623 |
| 17 | Kyrgyzstan | 1993 | 0.850417 | 0.650437 |
| 18 | Kyrgyzstan | 1994 | 0.82783  | 0.639884 |
| 19 | Kyrgyzstan | 1995 | 0.837243 | 0.653969 |
| 20 | Kyrgyzstan | 1996 | 0.834809 | 0.650548 |
| 21 | Kyrgyzstan | 1997 | 0.819205 | 0.637971 |
| 22 | Kyrgyzstan | 1998 | 0.831842 | 0.648076 |
| 23 | Kyrgyzstan | 1999 | 0.840267 | 0.664432 |
| 24 | Kyrgyzstan | 2000 | 0.844168 | 0.661815 |
| 25 | Kyrgyzstan | 2001 | 0.830856 | 0.658922 |
| 26 | Kyrgyzstan | 2002 | 0.828249 | 0.667975 |
| 27 | Kyrgyzstan | 2003 | 0.824127 | 0.67254  |
| 28 | Kyrgyzstan | 2004 | 0.810225 | 0.669459 |
| 29 | Kyrgyzstan | 2005 | 0.806345 | 0.668711 |
| 30 |            |      |          |          |
| 31 |            |      |          |          |
| 32 |            |      |          |          |
| 33 |            |      |          |          |
| 34 |            |      |          |          |
| 35 |            |      |          |          |
| 36 |            |      |          |          |
| 37 |            |      |          |          |
| 38 |            |      |          |          |
| 39 |            |      |          |          |
| 40 |            |      |          |          |
| 41 |            |      |          |          |
| 42 |            |      |          |          |
| 43 |            |      |          |          |
| 44 |            |      |          |          |
| 45 |            |      |          |          |
| 46 |            |      |          |          |

|                                  |      |          |          |
|----------------------------------|------|----------|----------|
| Kyrgyzstan                       | 2006 | 0.770748 | 0.64556  |
| Kyrgyzstan                       | 2007 | 0.755731 | 0.63405  |
| Kyrgyzstan                       | 2008 | 0.784272 | 0.65742  |
| Kyrgyzstan                       | 2009 | 0.81073  | 0.67425  |
| Kyrgyzstan                       | 2010 | 0.817755 | 0.685054 |
| Kyrgyzstan                       | 2011 | 0.840219 | 0.711408 |
| Kyrgyzstan                       | 2012 | 0.841235 | 0.716805 |
| Kyrgyzstan                       | 2013 | 0.84349  | 0.720402 |
| Kyrgyzstan                       | 2014 | 0.842241 | 0.705299 |
| Kyrgyzstan                       | 2015 | 0.860066 | 0.70151  |
| Kyrgyzstan                       | 2016 | 0.874609 | 0.704633 |
| Kyrgyzstan                       | 2017 | 0.849871 | 0.684358 |
| Kyrgyzstan                       | 2018 | 0.841746 | 0.687493 |
| Kyrgyzstan                       | 2019 | 0.83568  | 0.684807 |
| Lao People's Democratic Republic | 1990 | 1.080257 | 0.904518 |
| Lao People's Democratic Republic | 1991 | 1.079338 | 0.906014 |
| Lao People's Democratic Republic | 1992 | 1.08287  | 0.911731 |
| Lao People's Democratic Republic | 1993 | 1.084715 | 0.916095 |
| Lao People's Democratic Republic | 1994 | 1.087379 | 0.920926 |
| Lao People's Democratic Republic | 1995 | 1.087375 | 0.922831 |
| Lao People's Democratic Republic | 1996 | 1.079552 | 0.918976 |
| Lao People's Democratic Republic | 1997 | 1.072371 | 0.91556  |
| Lao People's Democratic Republic | 1998 | 1.058718 | 0.906658 |
| Lao People's Democratic Republic | 1999 | 1.052176 | 0.902857 |
| Lao People's Democratic Republic | 2000 | 1.036378 | 0.890862 |



|                                  |      |          |          |
|----------------------------------|------|----------|----------|
| Lao People's Democratic Republic | 2001 | 1.02433  | 0.883273 |
| Lao People's Democratic Republic | 2002 | 1.015382 | 0.87784  |
| Lao People's Democratic Republic | 2003 | 1.002093 | 0.869322 |
| Lao People's Democratic Republic | 2004 | 0.99141  | 0.862162 |
| Lao People's Democratic Republic | 2005 | 0.983924 | 0.856121 |
| Lao People's Democratic Republic | 2006 | 0.974171 | 0.850443 |
| Lao People's Democratic Republic | 2007 | 0.969745 | 0.848823 |
| Lao People's Democratic Republic | 2008 | 0.968779 | 0.849477 |
| Lao People's Democratic Republic | 2009 | 0.964921 | 0.846846 |
| Lao People's Democratic Republic | 2010 | 0.962207 | 0.843804 |
| Lao People's Democratic Republic | 2011 | 0.957551 | 0.841215 |
| Lao People's Democratic Republic | 2012 | 0.951021 | 0.838007 |
| Lao People's Democratic Republic | 2013 | 0.947474 | 0.837311 |
| Lao People's Democratic Republic | 2014 | 0.942958 | 0.835606 |
| Lao People's Democratic Republic | 2015 | 0.939503 | 0.833335 |
| Lao People's Democratic Republic | 2016 | 0.936031 | 0.833099 |
| Lao People's Democratic Republic | 2017 | 0.933775 | 0.833237 |
| Lao People's Democratic Republic | 2018 | 0.929921 | 0.831474 |
| Lao People's Democratic Republic | 2019 | 0.927608 | 0.831059 |
| Latvia                           | 1990 | 1.205006 | 0.533461 |
| Latvia                           | 1991 | 1.183017 | 0.522451 |
| Latvia                           | 1992 | 1.1596   | 0.513471 |
| Latvia                           | 1993 | 1.091711 | 0.49012  |
| Latvia                           | 1994 | 1.035137 | 0.470417 |
| Latvia                           | 1995 | 1.061499 | 0.481214 |

|         |      |          |          |
|---------|------|----------|----------|
| Latvia  | 1996 | 1.062243 | 0.487466 |
| Latvia  | 1997 | 1.055513 | 0.488382 |
| Latvia  | 1998 | 1.044571 | 0.489392 |
| Latvia  | 1999 | 1.049745 | 0.491657 |
| Latvia  | 2000 | 1.060367 | 0.490885 |
| Latvia  | 2001 | 1.058915 | 0.492391 |
| Latvia  | 2002 | 1.072686 | 0.496717 |
| Latvia  | 2003 | 1.191884 | 0.544692 |
| Latvia  | 2004 | 1.183538 | 0.544267 |
| Latvia  | 2005 | 1.135283 | 0.525288 |
| Latvia  | 2006 | 1.180254 | 0.548254 |
| Latvia  | 2007 | 1.191916 | 0.549398 |
| Latvia  | 2008 | 1.338475 | 0.604078 |
| Latvia  | 2009 | 1.473186 | 0.665503 |
| Latvia  | 2010 | 1.605934 | 0.719695 |
| Latvia  | 2011 | 1.734377 | 0.76653  |
| Latvia  | 2012 | 1.736977 | 0.761187 |
| Latvia  | 2013 | 1.795712 | 0.787659 |
| Latvia  | 2014 | 1.727391 | 0.755626 |
| Latvia  | 2015 | 1.815508 | 0.792721 |
| Latvia  | 2016 | 1.870149 | 0.814017 |
| Latvia  | 2017 | 1.84377  | 0.808288 |
| Latvia  | 2018 | 1.800032 | 0.794765 |
| Latvia  | 2019 | 1.764838 | 0.785235 |
| Lebanon | 1990 | 1.071467 | 0.981764 |

|    |         |      |          |          |
|----|---------|------|----------|----------|
| 1  |         |      |          |          |
| 2  |         |      |          |          |
| 3  |         |      |          |          |
| 4  |         |      |          |          |
| 5  | Lebanon | 1991 | 1.096284 | 1.005245 |
| 6  | Lebanon | 1992 | 1.107116 | 1.018167 |
| 7  | Lebanon | 1993 | 1.116366 | 1.030655 |
| 8  | Lebanon | 1994 | 1.123867 | 1.0433   |
| 9  | Lebanon | 1995 | 1.145438 | 1.068906 |
| 10 | Lebanon | 1996 | 1.152793 | 1.082827 |
| 11 | Lebanon | 1997 | 1.150313 | 1.087767 |
| 12 | Lebanon | 1998 | 1.160116 | 1.103824 |
| 13 | Lebanon | 1999 | 1.142017 | 1.095643 |
| 14 | Lebanon | 2000 | 1.136071 | 1.09651  |
| 15 | Lebanon | 2001 | 1.119939 | 1.087568 |
| 16 | Lebanon | 2002 | 1.108308 | 1.081466 |
| 17 | Lebanon | 2003 | 1.095733 | 1.073018 |
| 18 | Lebanon | 2004 | 1.071111 | 1.051902 |
| 19 | Lebanon | 2005 | 1.050357 | 1.031778 |
| 20 | Lebanon | 2006 | 1.030823 | 1.01005  |
| 21 | Lebanon | 2007 | 1.013675 | 0.987874 |
| 22 | Lebanon | 2008 | 1.001423 | 0.968311 |
| 23 | Lebanon | 2009 | 1.001269 | 0.95813  |
| 24 | Lebanon | 2010 | 1.011659 | 0.956166 |
| 25 | Lebanon | 2011 | 1.014475 | 0.945418 |
| 26 | Lebanon | 2012 | 1.01685  | 0.933202 |
| 27 | Lebanon | 2013 | 1.030695 | 0.93028  |
| 28 | Lebanon | 2014 | 1.053575 | 0.933731 |
| 29 | Lebanon | 2015 | 1.083446 | 0.942194 |
| 30 |         |      |          |          |
| 31 |         |      |          |          |
| 32 |         |      |          |          |
| 33 |         |      |          |          |
| 34 |         |      |          |          |
| 35 |         |      |          |          |
| 36 |         |      |          |          |
| 37 |         |      |          |          |
| 38 |         |      |          |          |
| 39 |         |      |          |          |
| 40 |         |      |          |          |
| 41 |         |      |          |          |
| 42 |         |      |          |          |
| 43 |         |      |          |          |
| 44 |         |      |          |          |
| 45 |         |      |          |          |
| 46 |         |      |          |          |

|    |         |      |          |          |
|----|---------|------|----------|----------|
| 1  |         |      |          |          |
| 2  |         |      |          |          |
| 3  |         |      |          |          |
| 4  |         |      |          |          |
| 5  | Lebanon | 2016 | 1.11331  | 0.94979  |
| 6  | Lebanon | 2017 | 1.146106 | 0.959078 |
| 7  | Lebanon | 2018 | 1.180669 | 0.969818 |
| 8  | Lebanon | 2019 | 1.214408 | 0.980276 |
| 9  | Lebanon | 2019 | 1.214408 | 0.980276 |
| 10 | Lesotho | 1990 | 0.547406 | 0.365938 |
| 11 | Lesotho | 1991 | 0.542313 | 0.361697 |
| 12 | Lesotho | 1992 | 0.533141 | 0.355213 |
| 13 | Lesotho | 1992 | 0.533141 | 0.355213 |
| 14 | Lesotho | 1993 | 0.52431  | 0.348481 |
| 15 | Lesotho | 1994 | 0.507527 | 0.337316 |
| 16 | Lesotho | 1994 | 0.507527 | 0.337316 |
| 17 | Lesotho | 1995 | 0.487595 | 0.323129 |
| 18 | Lesotho | 1996 | 0.460489 | 0.303582 |
| 19 | Lesotho | 1997 | 0.433845 | 0.283866 |
| 20 | Lesotho | 1997 | 0.433845 | 0.283866 |
| 21 | Lesotho | 1998 | 0.4568   | 0.296374 |
| 22 | Lesotho | 1999 | 0.483221 | 0.311493 |
| 23 | Lesotho | 1999 | 0.483221 | 0.311493 |
| 24 | Lesotho | 2000 | 0.541543 | 0.347625 |
| 25 | Lesotho | 2001 | 0.554774 | 0.355842 |
| 26 | Lesotho | 2002 | 0.580648 | 0.372819 |
| 27 | Lesotho | 2002 | 0.580648 | 0.372819 |
| 28 | Lesotho | 2003 | 0.628877 | 0.403491 |
| 29 | Lesotho | 2004 | 0.639428 | 0.412443 |
| 30 | Lesotho | 2005 | 0.656144 | 0.4243   |
| 31 | Lesotho | 2005 | 0.656144 | 0.4243   |
| 32 | Lesotho | 2006 | 0.657785 | 0.427168 |
| 33 | Lesotho | 2007 | 0.674236 | 0.438252 |
| 34 | Lesotho | 2008 | 0.701223 | 0.456121 |
| 35 | Lesotho | 2008 | 0.701223 | 0.456121 |
| 36 | Lesotho | 2009 | 0.707365 | 0.462249 |
| 37 | Lesotho | 2010 | 0.71764  | 0.471142 |
| 38 |         |      |          |          |
| 39 |         |      |          |          |
| 40 |         |      |          |          |
| 41 |         |      |          |          |
| 42 |         |      |          |          |
| 43 |         |      |          |          |
| 44 |         |      |          |          |
| 45 |         |      |          |          |
| 46 |         |      |          |          |

|         |      |          |          |
|---------|------|----------|----------|
| Lesotho | 2011 | 0.721541 | 0.476297 |
| Lesotho | 2012 | 0.738423 | 0.489759 |
| Lesotho | 2013 | 0.742987 | 0.495743 |
| Lesotho | 2014 | 0.740565 | 0.497532 |
| Lesotho | 2015 | 0.735094 | 0.496563 |
| Lesotho | 2016 | 0.722892 | 0.490841 |
| Lesotho | 2017 | 0.711107 | 0.4857   |
| Lesotho | 2018 | 0.705235 | 0.48378  |
| Lesotho | 2019 | 0.705917 | 0.485671 |
| Liberia | 1990 | 0.9085   | 0.996005 |
| Liberia | 1991 | 0.911296 | 0.998861 |
| Liberia | 1992 | 0.925106 | 1.011605 |
| Liberia | 1993 | 0.924282 | 1.008222 |
| Liberia | 1994 | 0.917343 | 0.998056 |
| Liberia | 1995 | 0.913325 | 0.981736 |
| Liberia | 1996 | 0.878938 | 0.937608 |
| Liberia | 1997 | 0.869847 | 0.918023 |
| Liberia | 1998 | 0.850108 | 0.894908 |
| Liberia | 1999 | 0.838556 | 0.881561 |
| Liberia | 2000 | 0.849539 | 0.884162 |
| Liberia | 2001 | 0.86329  | 0.889863 |
| Liberia | 2002 | 0.885972 | 0.907093 |
| Liberia | 2003 | 0.88833  | 0.908553 |
| Liberia | 2004 | 0.899159 | 0.919208 |
| Liberia | 2005 | 0.912469 | 0.924308 |

|         |      |          |          |
|---------|------|----------|----------|
| Liberia | 2006 | 0.92007  | 0.923942 |
| Liberia | 2007 | 0.924098 | 0.921404 |
| Liberia | 2008 | 0.926949 | 0.929499 |
| Liberia | 2009 | 0.922828 | 0.930079 |
| Liberia | 2010 | 0.930016 | 0.935905 |
| Liberia | 2011 | 0.941819 | 0.945008 |
| Liberia | 2012 | 0.942946 | 0.943157 |
| Liberia | 2013 | 0.938623 | 0.938907 |
| Liberia | 2014 | 0.940143 | 0.942135 |
| Liberia | 2015 | 0.942099 | 0.941489 |
| Liberia | 2016 | 0.950782 | 0.94713  |
| Liberia | 2017 | 0.957875 | 0.950271 |
| Liberia | 2018 | 0.960514 | 0.9517   |
| Liberia | 2019 | 0.96058  | 0.953451 |
| Libya   | 1990 | 1.055999 | 1.102401 |
| Libya   | 1991 | 1.061455 | 1.107185 |
| Libya   | 1992 | 1.031746 | 1.074807 |
| Libya   | 1993 | 1.021858 | 1.061961 |
| Libya   | 1994 | 1.014832 | 1.051481 |
| Libya   | 1995 | 1.008831 | 1.042201 |
| Libya   | 1996 | 1.016403 | 1.048683 |
| Libya   | 1997 | 1.000094 | 1.031347 |
| Libya   | 1998 | 0.991815 | 1.025339 |
| Libya   | 1999 | 0.982479 | 1.020405 |
| Libya   | 2000 | 0.97538  | 1.013309 |

|           |      |          |          |
|-----------|------|----------|----------|
| Libya     | 2001 | 0.934374 | 0.965433 |
| Libya     | 2002 | 0.904144 | 0.92635  |
| Libya     | 2003 | 0.899903 | 0.916303 |
| Libya     | 2004 | 0.962226 | 0.97716  |
| Libya     | 2005 | 1.003809 | 1.021942 |
| Libya     | 2006 | 1.022    | 1.036288 |
| Libya     | 2007 | 1.116889 | 1.122346 |
| Libya     | 2008 | 1.143164 | 1.149181 |
| Libya     | 2009 | 1.226991 | 1.228515 |
| Libya     | 2010 | 1.20636  | 1.206442 |
| Libya     | 2011 | 1.189759 | 1.190245 |
| Libya     | 2012 | 1.216209 | 1.220529 |
| Libya     | 2013 | 1.219613 | 1.224468 |
| Libya     | 2014 | 1.214545 | 1.220811 |
| Libya     | 2015 | 1.225026 | 1.231131 |
| Libya     | 2016 | 1.228146 | 1.234103 |
| Libya     | 2017 | 1.223734 | 1.228194 |
| Libya     | 2018 | 1.220224 | 1.223662 |
| Libya     | 2019 | 1.214728 | 1.216594 |
| Lithuania | 1990 | 0.971313 | 0.540179 |
| Lithuania | 1991 | 0.985477 | 0.54626  |
| Lithuania | 1992 | 0.989442 | 0.546932 |
| Lithuania | 1993 | 0.949626 | 0.53415  |
| Lithuania | 1994 | 0.96797  | 0.550823 |
| Lithuania | 1995 | 1.00168  | 0.568811 |

|            |      |          |          |
|------------|------|----------|----------|
| Lithuania  | 1996 | 1.019597 | 0.571551 |
| Lithuania  | 1997 | 1.05621  | 0.584609 |
| Lithuania  | 1998 | 1.055637 | 0.581885 |
| Lithuania  | 1999 | 1.050745 | 0.578728 |
| Lithuania  | 2000 | 1.057401 | 0.578423 |
| Lithuania  | 2001 | 1.067042 | 0.580847 |
| Lithuania  | 2002 | 1.080398 | 0.579941 |
| Lithuania  | 2003 | 1.136544 | 0.606356 |
| Lithuania  | 2004 | 1.103524 | 0.587737 |
| Lithuania  | 2005 | 1.084225 | 0.579263 |
| Lithuania  | 2006 | 1.113196 | 0.594664 |
| Lithuania  | 2007 | 1.096276 | 0.583299 |
| Lithuania  | 2008 | 1.198771 | 0.624744 |
| Lithuania  | 2009 | 1.229255 | 0.622287 |
| Lithuania  | 2010 | 1.21543  | 0.605984 |
| Lithuania  | 2011 | 1.22594  | 0.611089 |
| Lithuania  | 2012 | 1.243841 | 0.615975 |
| Lithuania  | 2013 | 1.228526 | 0.60492  |
| Lithuania  | 2014 | 1.242323 | 0.608617 |
| Lithuania  | 2015 | 1.266152 | 0.620736 |
| Lithuania  | 2016 | 1.250372 | 0.614161 |
| Lithuania  | 2017 | 1.337779 | 0.654176 |
| Lithuania  | 2018 | 1.319187 | 0.645546 |
| Lithuania  | 2019 | 1.350657 | 0.661003 |
| Luxembourg | 1990 | 1.393482 | 0.713825 |



|            |      |          |          |
|------------|------|----------|----------|
| Luxembourg | 1991 | 1.405872 | 0.718466 |
| Luxembourg | 1992 | 1.45974  | 0.741392 |
| Luxembourg | 1993 | 1.457165 | 0.737255 |
| Luxembourg | 1994 | 1.465173 | 0.734587 |
| Luxembourg | 1995 | 1.498477 | 0.746412 |
| Luxembourg | 1996 | 1.532323 | 0.762892 |
| Luxembourg | 1997 | 1.541765 | 0.767401 |
| Luxembourg | 1998 | 1.53696  | 0.763833 |
| Luxembourg | 1999 | 1.557634 | 0.771755 |
| Luxembourg | 2000 | 1.583232 | 0.780806 |
| Luxembourg | 2001 | 1.629875 | 0.804553 |
| Luxembourg | 2002 | 1.58333  | 0.786575 |
| Luxembourg | 2003 | 1.541825 | 0.764156 |
| Luxembourg | 2004 | 1.542719 | 0.759595 |
| Luxembourg | 2005 | 1.564119 | 0.7683   |
| Luxembourg | 2006 | 1.568078 | 0.772499 |
| Luxembourg | 2007 | 1.574228 | 0.78169  |
| Luxembourg | 2008 | 1.559942 | 0.780138 |
| Luxembourg | 2009 | 1.486968 | 0.747579 |
| Luxembourg | 2010 | 1.461338 | 0.738203 |
| Luxembourg | 2011 | 1.483877 | 0.760491 |
| Luxembourg | 2012 | 1.434736 | 0.751165 |
| Luxembourg | 2013 | 1.437263 | 0.769188 |
| Luxembourg | 2014 | 1.436678 | 0.781738 |
| Luxembourg | 2015 | 1.449766 | 0.795169 |

|    |            |      |          |          |
|----|------------|------|----------|----------|
| 1  |            |      |          |          |
| 2  |            |      |          |          |
| 3  |            |      |          |          |
| 4  |            |      |          |          |
| 5  | Luxembourg | 2016 | 1.452105 | 0.803893 |
| 6  | Luxembourg | 2017 | 1.424215 | 0.802565 |
| 7  | Luxembourg | 2018 | 1.395836 | 0.799804 |
| 8  | Luxembourg | 2019 | 1.372174 | 0.796658 |
| 9  |            |      |          |          |
| 10 | Madagascar | 1990 | 0.654498 | 0.630902 |
| 11 | Madagascar | 1991 | 0.665058 | 0.636322 |
| 12 | Madagascar | 1992 | 0.679494 | 0.646495 |
| 13 | Madagascar | 1993 | 0.674667 | 0.639008 |
| 14 | Madagascar | 1994 | 0.673359 | 0.633825 |
| 15 | Madagascar | 1995 | 0.672929 | 0.631342 |
| 16 | Madagascar | 1996 | 0.669081 | 0.625767 |
| 17 | Madagascar | 1997 | 0.68748  | 0.638721 |
| 18 | Madagascar | 1998 | 0.690612 | 0.638743 |
| 19 | Madagascar | 1999 | 0.690685 | 0.635064 |
| 20 | Madagascar | 2000 | 0.704869 | 0.643978 |
| 21 | Madagascar | 2001 | 0.712433 | 0.64898  |
| 22 | Madagascar | 2002 | 0.730031 | 0.662803 |
| 23 | Madagascar | 2003 | 0.730674 | 0.662693 |
| 24 | Madagascar | 2004 | 0.739866 | 0.667256 |
| 25 | Madagascar | 2005 | 0.736319 | 0.660275 |
| 26 | Madagascar | 2006 | 0.730087 | 0.65173  |
| 27 | Madagascar | 2007 | 0.726425 | 0.64593  |
| 28 | Madagascar | 2008 | 0.72202  | 0.640593 |
| 29 | Madagascar | 2009 | 0.728877 | 0.645161 |
| 30 | Madagascar | 2010 | 0.734435 | 0.649298 |
| 31 |            |      |          |          |
| 32 |            |      |          |          |
| 33 |            |      |          |          |
| 34 |            |      |          |          |
| 35 |            |      |          |          |
| 36 |            |      |          |          |
| 37 |            |      |          |          |
| 38 |            |      |          |          |
| 39 |            |      |          |          |
| 40 |            |      |          |          |
| 41 |            |      |          |          |
| 42 |            |      |          |          |
| 43 |            |      |          |          |
| 44 |            |      |          |          |
| 45 |            |      |          |          |
| 46 |            |      |          |          |

1  
2  
3  
4  
5  
6  
7  
8  
9  
10  
11  
12  
13  
14  
15  
16  
17  
18  
19  
20  
21  
22  
23  
24  
25  
26  
27  
28  
29  
30  
31  
32  
33  
34  
35  
36  
37  
38  
39  
40  
41  
42  
43  
44  
45  
46

|            |      |          |          |
|------------|------|----------|----------|
| Madagascar | 2011 | 0.741916 | 0.654738 |
| Madagascar | 2012 | 0.749575 | 0.661406 |
| Madagascar | 2013 | 0.756602 | 0.668668 |
| Madagascar | 2014 | 0.764441 | 0.6762   |
| Madagascar | 2015 | 0.770191 | 0.682863 |
| Madagascar | 2016 | 0.774117 | 0.690311 |
| Madagascar | 2017 | 0.779615 | 0.698152 |
| Madagascar | 2018 | 0.78173  | 0.702984 |
| Madagascar | 2019 | 0.783939 | 0.70848  |
| Malawi     | 1990 | 0.863324 | 0.714457 |
| Malawi     | 1991 | 0.838268 | 0.692198 |
| Malawi     | 1992 | 0.814011 | 0.670492 |
| Malawi     | 1993 | 0.796118 | 0.651846 |
| Malawi     | 1994 | 0.780322 | 0.635558 |
| Malawi     | 1995 | 0.762866 | 0.621129 |
| Malawi     | 1996 | 0.748306 | 0.610385 |
| Malawi     | 1997 | 0.734158 | 0.599556 |
| Malawi     | 1998 | 0.72624  | 0.593395 |
| Malawi     | 1999 | 0.724455 | 0.586929 |
| Malawi     | 2000 | 0.715552 | 0.575648 |
| Malawi     | 2001 | 0.705807 | 0.565471 |
| Malawi     | 2002 | 0.70057  | 0.558742 |
| Malawi     | 2003 | 0.700275 | 0.556185 |
| Malawi     | 2004 | 0.690505 | 0.54759  |
| Malawi     | 2005 | 0.684543 | 0.540365 |

|    |          |      |          |          |
|----|----------|------|----------|----------|
| 1  | Malawi   | 2006 | 0.682796 | 0.534722 |
| 2  | Malawi   | 2007 | 0.686828 | 0.535867 |
| 3  | Malawi   | 2008 | 0.697033 | 0.54052  |
| 4  | Malawi   | 2009 | 0.707276 | 0.54586  |
| 5  | Malawi   | 2010 | 0.71033  | 0.546968 |
| 6  | Malawi   | 2011 | 0.714983 | 0.54886  |
| 7  | Malawi   | 2012 | 0.724143 | 0.555918 |
| 8  | Malawi   | 2013 | 0.733413 | 0.563464 |
| 9  | Malawi   | 2014 | 0.737841 | 0.569168 |
| 10 | Malawi   | 2015 | 0.74575  | 0.576821 |
| 11 | Malawi   | 2016 | 0.748773 | 0.583159 |
| 12 | Malawi   | 2017 | 0.754559 | 0.591801 |
| 13 | Malawi   | 2018 | 0.760637 | 0.599123 |
| 14 | Malawi   | 2019 | 0.765263 | 0.605597 |
| 15 | Malaysia | 1990 | 0.819196 | 0.788761 |
| 16 | Malaysia | 1991 | 0.846018 | 0.816191 |
| 17 | Malaysia | 1992 | 0.886443 | 0.853191 |
| 18 | Malaysia | 1993 | 0.94471  | 0.913312 |
| 19 | Malaysia | 1994 | 0.975225 | 0.954186 |
| 20 | Malaysia | 1995 | 0.982179 | 0.948723 |
| 21 | Malaysia | 1996 | 0.950804 | 0.889981 |
| 22 | Malaysia | 1997 | 0.965724 | 0.902726 |
| 23 | Malaysia | 1998 | 1.026153 | 0.991537 |
| 24 | Malaysia | 1999 | 1.047448 | 1.026159 |
| 25 | Malaysia | 2000 | 1.034293 | 1.007025 |

|    |          |      |          |          |
|----|----------|------|----------|----------|
| 1  |          |      |          |          |
| 2  |          |      |          |          |
| 3  |          |      |          |          |
| 4  |          |      |          |          |
| 5  | Malaysia | 2001 | 1.027312 | 0.987668 |
| 6  | Malaysia | 2002 | 1.078764 | 1.04399  |
| 7  | Malaysia | 2003 | 1.063797 | 1.039922 |
| 8  | Malaysia | 2004 | 1.060262 | 1.061847 |
| 9  | Malaysia | 2005 | 1.066861 | 1.080876 |
| 10 | Malaysia | 2006 | 1.07099  | 1.094214 |
| 11 | Malaysia | 2007 | 1.072336 | 1.107498 |
| 12 | Malaysia | 2008 | 1.059789 | 1.110449 |
| 13 | Malaysia | 2009 | 1.063617 | 1.123318 |
| 14 | Malaysia | 2010 | 1.057671 | 1.11054  |
| 15 | Malaysia | 2011 | 1.04982  | 1.098519 |
| 16 | Malaysia | 2012 | 1.067402 | 1.137766 |
| 17 | Malaysia | 2013 | 1.064808 | 1.180301 |
| 18 | Malaysia | 2014 | 1.056546 | 1.179    |
| 19 | Malaysia | 2015 | 1.053687 | 1.173967 |
| 20 | Malaysia | 2016 | 1.045563 | 1.136786 |
| 21 | Malaysia | 2017 | 1.04171  | 1.122423 |
| 22 | Malaysia | 2018 | 1.044457 | 1.117039 |
| 23 | Malaysia | 2019 | 1.041762 | 1.08757  |
| 24 | Maldives | 1990 | 0.963518 | 1.206453 |
| 25 | Maldives | 1991 | 0.972691 | 1.238021 |
| 26 | Maldives | 1992 | 0.98505  | 1.276931 |
| 27 | Maldives | 1993 | 0.95509  | 1.239805 |
| 28 | Maldives | 1994 | 0.900192 | 1.140108 |
| 29 | Maldives | 1995 | 0.914347 | 1.166679 |
| 30 |          |      |          |          |
| 31 |          |      |          |          |
| 32 |          |      |          |          |
| 33 |          |      |          |          |
| 34 |          |      |          |          |
| 35 |          |      |          |          |
| 36 |          |      |          |          |
| 37 |          |      |          |          |
| 38 |          |      |          |          |
| 39 |          |      |          |          |
| 40 |          |      |          |          |
| 41 |          |      |          |          |
| 42 |          |      |          |          |
| 43 |          |      |          |          |
| 44 |          |      |          |          |
| 45 |          |      |          |          |
| 46 |          |      |          |          |

|          |      |          |          |
|----------|------|----------|----------|
| Maldives | 1996 | 0.962101 | 1.260357 |
| Maldives | 1997 | 0.99324  | 1.318302 |
| Maldives | 1998 | 0.950574 | 1.23224  |
| Maldives | 1999 | 0.950123 | 1.207546 |
| Maldives | 2000 | 0.963335 | 1.233702 |
| Maldives | 2001 | 0.952392 | 1.219721 |
| Maldives | 2002 | 0.85437  | 1.079451 |
| Maldives | 2003 | 0.855313 | 1.076779 |
| Maldives | 2004 | 0.863548 | 1.078919 |
| Maldives | 2005 | 0.867198 | 1.075533 |
| Maldives | 2006 | 0.878145 | 1.082157 |
| Maldives | 2007 | 0.896513 | 1.09889  |
| Maldives | 2008 | 0.915916 | 1.116226 |
| Maldives | 2009 | 0.944785 | 1.145004 |
| Maldives | 2010 | 0.961791 | 1.162282 |
| Maldives | 2011 | 0.957437 | 1.155309 |
| Maldives | 2012 | 0.951009 | 1.149364 |
| Maldives | 2013 | 0.938156 | 1.13562  |
| Maldives | 2014 | 0.919664 | 1.11528  |
| Maldives | 2015 | 0.897286 | 1.09207  |
| Maldives | 2016 | 0.902015 | 1.100388 |
| Maldives | 2017 | 0.903999 | 1.105606 |
| Maldives | 2018 | 0.905796 | 1.110964 |
| Maldives | 2019 | 0.90613  | 1.11559  |
| Mali     | 1990 | 1.052152 | 0.960348 |

|    |      |      |          |          |
|----|------|------|----------|----------|
| 1  |      |      |          |          |
| 2  |      |      |          |          |
| 3  |      |      |          |          |
| 4  |      |      |          |          |
| 5  | Mali | 1991 | 1.049099 | 0.963432 |
| 6  | Mali | 1992 | 1.04031  | 0.962519 |
| 7  | Mali | 1993 | 1.024426 | 0.95587  |
| 8  | Mali | 1994 | 1.014837 | 0.953214 |
| 9  | Mali | 1995 | 1.01442  | 0.958046 |
| 10 | Mali | 1996 | 1.009798 | 0.959951 |
| 11 | Mali | 1997 | 1.013619 | 0.970303 |
| 12 | Mali | 1998 | 1.006038 | 0.969867 |
| 13 | Mali | 1999 | 0.988446 | 0.959086 |
| 14 | Mali | 2000 | 0.979709 | 0.955419 |
| 15 | Mali | 2001 | 0.967442 | 0.950056 |
| 16 | Mali | 2002 | 0.956589 | 0.943906 |
| 17 | Mali | 2003 | 0.948678 | 0.941863 |
| 18 | Mali | 2004 | 0.931661 | 0.929066 |
| 19 | Mali | 2005 | 0.920049 | 0.920402 |
| 20 | Mali | 2006 | 0.912475 | 0.915756 |
| 21 | Mali | 2007 | 0.896128 | 0.902561 |
| 22 | Mali | 2008 | 0.880758 | 0.889383 |
| 23 | Mali | 2009 | 0.8671   | 0.8774   |
| 24 | Mali | 2010 | 0.862463 | 0.874125 |
| 25 | Mali | 2011 | 0.861756 | 0.875638 |
| 26 | Mali | 2012 | 0.860395 | 0.876241 |
| 27 | Mali | 2013 | 0.852067 | 0.868954 |
| 28 | Mali | 2014 | 0.849678 | 0.868136 |
| 29 | Mali | 2015 | 0.842445 | 0.862383 |
| 30 |      |      |          |          |
| 31 |      |      |          |          |
| 32 |      |      |          |          |
| 33 |      |      |          |          |
| 34 |      |      |          |          |
| 35 |      |      |          |          |
| 36 |      |      |          |          |
| 37 |      |      |          |          |
| 38 |      |      |          |          |
| 39 |      |      |          |          |
| 40 |      |      |          |          |
| 41 |      |      |          |          |
| 42 |      |      |          |          |
| 43 |      |      |          |          |
| 44 |      |      |          |          |
| 45 |      |      |          |          |
| 46 |      |      |          |          |

|       |      |          |          |
|-------|------|----------|----------|
| Mali  | 2016 | 0.832439 | 0.855942 |
| Mali  | 2017 | 0.822786 | 0.849405 |
| Mali  | 2018 | 0.827136 | 0.855255 |
| Mali  | 2019 | 0.830844 | 0.85997  |
| Malta | 1990 | 1.008276 | 0.651471 |
| Malta | 1991 | 1.030094 | 0.651632 |
| Malta | 1992 | 1.060652 | 0.662053 |
| Malta | 1993 | 1.091122 | 0.675794 |
| Malta | 1994 | 1.154814 | 0.722773 |
| Malta | 1995 | 1.172958 | 0.735947 |
| Malta | 1996 | 1.138106 | 0.716251 |
| Malta | 1997 | 1.119391 | 0.702479 |
| Malta | 1998 | 1.163283 | 0.728761 |
| Malta | 1999 | 1.16292  | 0.731829 |
| Malta | 2000 | 1.163634 | 0.732145 |
| Malta | 2001 | 1.136787 | 0.714885 |
| Malta | 2002 | 1.094725 | 0.687322 |
| Malta | 2003 | 1.085162 | 0.685129 |
| Malta | 2004 | 1.089569 | 0.692118 |
| Malta | 2005 | 1.035043 | 0.659262 |
| Malta | 2006 | 1.047596 | 0.668544 |
| Malta | 2007 | 1.038632 | 0.664038 |
| Malta | 2008 | 1.016727 | 0.651006 |
| Malta | 2009 | 1.034098 | 0.663307 |
| Malta | 2010 | 1.009965 | 0.647124 |



|    |                  |      |          |          |
|----|------------------|------|----------|----------|
| 1  |                  |      |          |          |
| 2  |                  |      |          |          |
| 3  |                  |      |          |          |
| 4  |                  |      |          |          |
| 5  | Malta            | 2011 | 1.002912 | 0.643467 |
| 6  | Malta            | 2012 | 1.017241 | 0.650393 |
| 7  | Malta            | 2013 | 1.027006 | 0.65451  |
| 8  | Malta            | 2014 | 1.031116 | 0.659429 |
| 9  | Malta            | 2015 | 1.140398 | 0.725348 |
| 10 | Malta            | 2016 | 1.132609 | 0.72308  |
| 11 | Malta            | 2017 | 1.126121 | 0.720151 |
| 12 | Malta            | 2018 | 1.114579 | 0.716802 |
| 13 | Malta            | 2019 | 1.098586 | 0.713248 |
| 14 | Marshall Islands | 1990 | 0.829497 | 0.73961  |
| 15 | Marshall Islands | 1991 | 0.84873  | 0.754036 |
| 16 | Marshall Islands | 1992 | 0.862116 | 0.764425 |
| 17 | Marshall Islands | 1993 | 0.895229 | 0.794611 |
| 18 | Marshall Islands | 1994 | 1.000765 | 0.922647 |
| 19 | Marshall Islands | 1995 | 1.014702 | 0.941943 |
| 20 | Marshall Islands | 1996 | 1.041135 | 0.970383 |
| 21 | Marshall Islands | 1997 | 1.044842 | 0.980008 |
| 22 | Marshall Islands | 1998 | 1.04679  | 0.986713 |
| 23 | Marshall Islands | 1999 | 1.041891 | 0.986813 |
| 24 | Marshall Islands | 2000 | 1.037892 | 0.986503 |
| 25 | Marshall Islands | 2001 | 1.034632 | 0.986928 |
| 26 | Marshall Islands | 2002 | 1.035458 | 0.991621 |
| 27 | Marshall Islands | 2003 | 1.033946 | 0.994506 |
| 28 | Marshall Islands | 2004 | 1.043391 | 1.007015 |
| 29 | Marshall Islands | 2005 | 1.033638 | 1.00178  |
| 30 |                  |      |          |          |
| 31 |                  |      |          |          |
| 32 |                  |      |          |          |
| 33 |                  |      |          |          |
| 34 |                  |      |          |          |
| 35 |                  |      |          |          |
| 36 |                  |      |          |          |
| 37 |                  |      |          |          |
| 38 |                  |      |          |          |
| 39 |                  |      |          |          |
| 40 |                  |      |          |          |
| 41 |                  |      |          |          |
| 42 |                  |      |          |          |
| 43 |                  |      |          |          |
| 44 |                  |      |          |          |
| 45 |                  |      |          |          |
| 46 |                  |      |          |          |

|    |                  |      |          |          |
|----|------------------|------|----------|----------|
| 1  |                  |      |          |          |
| 2  |                  |      |          |          |
| 3  |                  |      |          |          |
| 4  |                  |      |          |          |
| 5  | Marshall Islands | 2006 | 1.024225 | 0.996898 |
| 6  | Marshall Islands | 2007 | 1.005892 | 0.982809 |
| 7  | Marshall Islands | 2008 | 0.989552 | 0.970255 |
| 8  | Marshall Islands | 2009 | 0.978998 | 0.962731 |
| 9  | Marshall Islands | 2010 | 0.973948 | 0.960239 |
| 10 | Marshall Islands | 2011 | 0.966812 | 0.954487 |
| 11 | Marshall Islands | 2012 | 0.960175 | 0.948971 |
| 12 | Marshall Islands | 2013 | 0.955867 | 0.945321 |
| 13 | Marshall Islands | 2014 | 0.950784 | 0.939663 |
| 14 | Marshall Islands | 2015 | 0.947166 | 0.936217 |
| 15 | Marshall Islands | 2016 | 0.946444 | 0.934338 |
| 16 | Marshall Islands | 2017 | 0.948871 | 0.935285 |
| 17 | Marshall Islands | 2018 | 0.94816  | 0.933495 |
| 18 | Marshall Islands | 2019 | 0.948073 | 0.931827 |
| 19 | Mauritania       | 1990 | 1.292419 | 1.123301 |
| 20 | Mauritania       | 1991 | 1.304114 | 1.144613 |
| 21 | Mauritania       | 1992 | 1.311313 | 1.163473 |
| 22 | Mauritania       | 1993 | 1.316344 | 1.181659 |
| 23 | Mauritania       | 1994 | 1.321783 | 1.193751 |
| 24 | Mauritania       | 1995 | 1.330612 | 1.208804 |
| 25 | Mauritania       | 1996 | 1.334792 | 1.220411 |
| 26 | Mauritania       | 1997 | 1.337735 | 1.23014  |
| 27 | Mauritania       | 1998 | 1.342861 | 1.23923  |
| 28 | Mauritania       | 1999 | 1.355719 | 1.257931 |
| 29 | Mauritania       | 2000 | 1.354422 | 1.266274 |
| 30 |                  |      |          |          |
| 31 |                  |      |          |          |
| 32 |                  |      |          |          |
| 33 |                  |      |          |          |
| 34 |                  |      |          |          |
| 35 |                  |      |          |          |
| 36 |                  |      |          |          |
| 37 |                  |      |          |          |
| 38 |                  |      |          |          |
| 39 |                  |      |          |          |
| 40 |                  |      |          |          |
| 41 |                  |      |          |          |
| 42 |                  |      |          |          |
| 43 |                  |      |          |          |
| 44 |                  |      |          |          |
| 45 |                  |      |          |          |
| 46 |                  |      |          |          |

|    |            |      |          |          |
|----|------------|------|----------|----------|
| 1  |            |      |          |          |
| 2  |            |      |          |          |
| 3  |            |      |          |          |
| 4  |            |      |          |          |
| 5  | Mauritania | 2001 | 1.338039 | 1.263431 |
| 6  | Mauritania | 2002 | 1.326071 | 1.263031 |
| 7  | Mauritania | 2003 | 1.32429  | 1.269958 |
| 8  | Mauritania | 2004 | 1.312932 | 1.26527  |
| 9  | Mauritania | 2005 | 1.308692 | 1.266842 |
| 10 | Mauritania | 2006 | 1.304456 | 1.274066 |
| 11 | Mauritania | 2007 | 1.286568 | 1.263329 |
| 12 | Mauritania | 2008 | 1.259677 | 1.245972 |
| 13 | Mauritania | 2009 | 1.226907 | 1.223864 |
| 14 | Mauritania | 2010 | 1.206542 | 1.21002  |
| 15 | Mauritania | 2011 | 1.194471 | 1.198175 |
| 16 | Mauritania | 2012 | 1.18269  | 1.187555 |
| 17 | Mauritania | 2013 | 1.170872 | 1.180314 |
| 18 | Mauritania | 2014 | 1.181396 | 1.189417 |
| 19 | Mauritania | 2015 | 1.185942 | 1.195127 |
| 20 | Mauritania | 2016 | 1.190154 | 1.203213 |
| 21 | Mauritania | 2017 | 1.186943 | 1.204661 |
| 22 | Mauritania | 2018 | 1.18427  | 1.206028 |
| 23 | Mauritania | 2019 | 1.182881 | 1.204325 |
| 24 | Mauritania | 2019 | 1.182881 | 1.204325 |
| 25 | Mauritania | 2019 | 1.182881 | 1.204325 |
| 26 | Mauritania | 2019 | 1.182881 | 1.204325 |
| 27 | Mauritania | 2019 | 1.182881 | 1.204325 |
| 28 | Mauritania | 2019 | 1.182881 | 1.204325 |
| 29 | Mauritania | 2019 | 1.182881 | 1.204325 |
| 30 | Mauritania | 2019 | 1.182881 | 1.204325 |
| 31 | Mauritius  | 1990 | 0.93321  | 0.754336 |
| 32 | Mauritius  | 1991 | 0.950503 | 0.755029 |
| 33 | Mauritius  | 1992 | 1.044833 | 0.830833 |
| 34 | Mauritius  | 1993 | 0.972502 | 0.775092 |
| 35 | Mauritius  | 1994 | 0.996268 | 0.7839   |
| 36 | Mauritius  | 1995 | 0.988114 | 0.789355 |
| 37 | Mauritius  | 1995 | 0.988114 | 0.789355 |
| 38 |            |      |          |          |
| 39 |            |      |          |          |
| 40 |            |      |          |          |
| 41 |            |      |          |          |
| 42 |            |      |          |          |
| 43 |            |      |          |          |
| 44 |            |      |          |          |
| 45 |            |      |          |          |
| 46 |            |      |          |          |

|           |      |          |          |
|-----------|------|----------|----------|
| Mauritius | 1996 | 0.923973 | 0.738861 |
| Mauritius | 1997 | 0.899823 | 0.699261 |
| Mauritius | 1998 | 0.910683 | 0.702415 |
| Mauritius | 1999 | 0.928566 | 0.717855 |
| Mauritius | 2000 | 0.995053 | 0.77431  |
| Mauritius | 2001 | 0.979239 | 0.769047 |
| Mauritius | 2002 | 0.899328 | 0.7055   |
| Mauritius | 2003 | 0.943053 | 0.733968 |
| Mauritius | 2004 | 0.925262 | 0.723859 |
| Mauritius | 2005 | 0.92733  | 0.727248 |
| Mauritius | 2006 | 0.942548 | 0.745284 |
| Mauritius | 2007 | 0.934733 | 0.753928 |
| Mauritius | 2008 | 0.902499 | 0.735209 |
| Mauritius | 2009 | 0.855919 | 0.696554 |
| Mauritius | 2010 | 0.884717 | 0.710758 |
| Mauritius | 2011 | 0.843754 | 0.678107 |
| Mauritius | 2012 | 0.895397 | 0.714052 |
| Mauritius | 2013 | 0.870548 | 0.695416 |
| Mauritius | 2014 | 0.872555 | 0.701738 |
| Mauritius | 2015 | 0.849229 | 0.685232 |
| Mauritius | 2016 | 0.828713 | 0.669571 |
| Mauritius | 2017 | 0.889327 | 0.717066 |
| Mauritius | 2018 | 0.873638 | 0.706288 |
| Mauritius | 2019 | 0.865816 | 0.699819 |
| Mexico    | 1990 | 1.078398 | 1.048632 |

1  
2  
3  
4  
5  
6  
7  
8  
9  
10  
11  
12  
13  
14  
15  
16  
17  
18  
19  
20  
21  
22  
23  
24  
25  
26  
27  
28  
29  
30  
31  
32  
33  
34  
35  
36  
37  
38  
39  
40  
41  
42  
43  
44  
45  
46

|        |      |          |          |
|--------|------|----------|----------|
| Mexico | 1991 | 1.075019 | 1.040023 |
| Mexico | 1992 | 1.086669 | 1.043003 |
| Mexico | 1993 | 1.091016 | 1.040778 |
| Mexico | 1994 | 1.082324 | 1.027802 |
| Mexico | 1995 | 1.095406 | 1.033573 |
| Mexico | 1996 | 1.094571 | 1.026731 |
| Mexico | 1997 | 1.094724 | 1.022765 |
| Mexico | 1998 | 1.102235 | 1.022629 |
| Mexico | 1999 | 1.120489 | 1.033242 |
| Mexico | 2000 | 1.097268 | 1.009582 |
| Mexico | 2001 | 1.101573 | 1.009819 |
| Mexico | 2002 | 1.080918 | 0.987715 |
| Mexico | 2003 | 1.074058 | 0.97873  |
| Mexico | 2004 | 1.071029 | 0.974993 |
| Mexico | 2005 | 1.053626 | 0.959082 |
| Mexico | 2006 | 1.049174 | 0.953395 |
| Mexico | 2007 | 1.047691 | 0.950921 |
| Mexico | 2008 | 1.020609 | 0.923375 |
| Mexico | 2009 | 1.031489 | 0.928038 |
| Mexico | 2010 | 1.033104 | 0.92865  |
| Mexico | 2011 | 1.016719 | 0.911677 |
| Mexico | 2012 | 1.010454 | 0.902523 |
| Mexico | 2013 | 0.984236 | 0.875506 |
| Mexico | 2014 | 0.978046 | 0.867256 |
| Mexico | 2015 | 0.960093 | 0.848844 |

|                                  |      |          |          |
|----------------------------------|------|----------|----------|
| Mexico                           | 2016 | 0.946389 | 0.834406 |
| Mexico                           | 2017 | 0.919663 | 0.808347 |
| Mexico                           | 2018 | 0.92066  | 0.806294 |
| Mexico                           | 2019 | 0.912661 | 0.794804 |
| Micronesia (Federated States of) | 1990 | 1.044948 | 0.976014 |
| Micronesia (Federated States of) | 1991 | 1.063367 | 0.987065 |
| Micronesia (Federated States of) | 1992 | 1.085287 | 1.00053  |
| Micronesia (Federated States of) | 1993 | 1.104225 | 1.010412 |
| Micronesia (Federated States of) | 1994 | 1.127485 | 1.023454 |
| Micronesia (Federated States of) | 1995 | 1.154087 | 1.039054 |
| Micronesia (Federated States of) | 1996 | 1.175387 | 1.049479 |
| Micronesia (Federated States of) | 1997 | 1.192982 | 1.057541 |
| Micronesia (Federated States of) | 1998 | 1.205251 | 1.061571 |
| Micronesia (Federated States of) | 1999 | 1.216182 | 1.065192 |
| Micronesia (Federated States of) | 2000 | 1.22136  | 1.064296 |
| Micronesia (Federated States of) | 2001 | 1.227829 | 1.06496  |
| Micronesia (Federated States of) | 2002 | 1.23739  | 1.069029 |
| Micronesia (Federated States of) | 2003 | 1.224554 | 1.054574 |
| Micronesia (Federated States of) | 2004 | 1.221401 | 1.049043 |
| Micronesia (Federated States of) | 2005 | 1.212073 | 1.039666 |
| Micronesia (Federated States of) | 2006 | 1.227931 | 1.050787 |
| Micronesia (Federated States of) | 2007 | 1.19562  | 1.021078 |
| Micronesia (Federated States of) | 2008 | 1.162752 | 0.99167  |
| Micronesia (Federated States of) | 2009 | 1.129838 | 0.96289  |
| Micronesia (Federated States of) | 2010 | 1.101329 | 0.937482 |

|    |                                  |      |          |          |
|----|----------------------------------|------|----------|----------|
| 1  |                                  |      |          |          |
| 2  |                                  |      |          |          |
| 3  |                                  |      |          |          |
| 4  |                                  |      |          |          |
| 5  | Micronesia (Federated States of) | 2011 | 1.064706 | 0.907    |
| 6  | Micronesia (Federated States of) | 2012 | 1.034839 | 0.882568 |
| 7  | Micronesia (Federated States of) | 2013 | 1.009272 | 0.861923 |
| 8  | Micronesia (Federated States of) | 2014 | 0.988996 | 0.845971 |
| 9  | Micronesia (Federated States of) | 2015 | 0.97729  | 0.835961 |
| 10 | Micronesia (Federated States of) | 2016 | 0.962942 | 0.825061 |
| 11 | Micronesia (Federated States of) | 2017 | 0.959648 | 0.823572 |
| 12 | Micronesia (Federated States of) | 2018 | 0.955921 | 0.821916 |
| 13 | Micronesia (Federated States of) | 2019 | 0.951491 | 0.819525 |
| 14 | Monaco                           | 1990 | 0.925141 | 0.509605 |
| 15 | Monaco                           | 1991 | 0.927871 | 0.511247 |
| 16 | Monaco                           | 1992 | 0.935894 | 0.515033 |
| 17 | Monaco                           | 1993 | 0.947152 | 0.520603 |
| 18 | Monaco                           | 1994 | 0.958841 | 0.52651  |
| 19 | Monaco                           | 1995 | 0.968499 | 0.532215 |
| 20 | Monaco                           | 1996 | 0.976394 | 0.538766 |
| 21 | Monaco                           | 1997 | 0.991226 | 0.548622 |
| 22 | Monaco                           | 1998 | 1.010798 | 0.560403 |
| 23 | Monaco                           | 1999 | 1.034407 | 0.573567 |
| 24 | Monaco                           | 2000 | 1.055584 | 0.586374 |
| 25 | Monaco                           | 2001 | 1.068534 | 0.59852  |
| 26 | Monaco                           | 2002 | 1.075324 | 0.609122 |
| 27 | Monaco                           | 2003 | 1.081212 | 0.620175 |
| 28 | Monaco                           | 2004 | 1.086635 | 0.630366 |
| 29 | Monaco                           | 2005 | 1.088433 | 0.639145 |
| 30 |                                  |      |          |          |
| 31 |                                  |      |          |          |
| 32 |                                  |      |          |          |
| 33 |                                  |      |          |          |
| 34 |                                  |      |          |          |
| 35 |                                  |      |          |          |
| 36 |                                  |      |          |          |
| 37 |                                  |      |          |          |
| 38 |                                  |      |          |          |
| 39 |                                  |      |          |          |
| 40 |                                  |      |          |          |
| 41 |                                  |      |          |          |
| 42 |                                  |      |          |          |
| 43 |                                  |      |          |          |
| 44 |                                  |      |          |          |
| 45 |                                  |      |          |          |
| 46 |                                  |      |          |          |

|    |          |      |          |          |
|----|----------|------|----------|----------|
| 1  |          |      |          |          |
| 2  |          |      |          |          |
| 3  |          |      |          |          |
| 4  |          |      |          |          |
| 5  | Monaco   | 2006 | 1.082645 | 0.645151 |
| 6  | Monaco   | 2007 | 1.070951 | 0.648902 |
| 7  | Monaco   | 2008 | 1.059886 | 0.653042 |
| 8  | Monaco   | 2009 | 1.054282 | 0.658945 |
| 9  | Monaco   | 2010 | 1.052876 | 0.666098 |
| 10 | Monaco   | 2011 | 1.050548 | 0.672052 |
| 11 | Monaco   | 2012 | 1.046823 | 0.678352 |
| 12 | Monaco   | 2013 | 1.03124  | 0.674487 |
| 13 | Monaco   | 2014 | 1.025477 | 0.675192 |
| 14 | Monaco   | 2015 | 1.022501 | 0.676323 |
| 15 | Monaco   | 2016 | 1.017735 | 0.675253 |
| 16 | Monaco   | 2017 | 1.011475 | 0.673635 |
| 17 | Monaco   | 2018 | 1.004845 | 0.672659 |
| 18 | Monaco   | 2019 | 0.997704 | 0.670993 |
| 19 | Mongolia | 1990 | 1.068489 | 0.837677 |
| 20 | Mongolia | 1991 | 1.083221 | 0.846939 |
| 21 | Mongolia | 1992 | 1.081256 | 0.854461 |
| 22 | Mongolia | 1993 | 1.092407 | 0.854763 |
| 23 | Mongolia | 1994 | 1.087824 | 0.850761 |
| 24 | Mongolia | 1995 | 1.079002 | 0.852306 |
| 25 | Mongolia | 1996 | 1.060124 | 0.840739 |
| 26 | Mongolia | 1997 | 1.082339 | 0.856448 |
| 27 | Mongolia | 1998 | 1.074045 | 0.833624 |
| 28 | Mongolia | 1999 | 1.084455 | 0.837111 |
| 29 | Mongolia | 2000 | 1.047604 | 0.821764 |
| 30 |          |      |          |          |
| 31 |          |      |          |          |
| 32 |          |      |          |          |
| 33 |          |      |          |          |
| 34 |          |      |          |          |
| 35 |          |      |          |          |
| 36 |          |      |          |          |
| 37 |          |      |          |          |
| 38 |          |      |          |          |
| 39 |          |      |          |          |
| 40 |          |      |          |          |
| 41 |          |      |          |          |
| 42 |          |      |          |          |
| 43 |          |      |          |          |
| 44 |          |      |          |          |
| 45 |          |      |          |          |
| 46 |          |      |          |          |



|            |      |          |          |
|------------|------|----------|----------|
| Mongolia   | 2001 | 0.976921 | 0.761449 |
| Mongolia   | 2002 | 0.921562 | 0.715086 |
| Mongolia   | 2003 | 0.882353 | 0.687733 |
| Mongolia   | 2004 | 0.854392 | 0.675443 |
| Mongolia   | 2005 | 0.832971 | 0.664011 |
| Mongolia   | 2006 | 0.833794 | 0.662218 |
| Mongolia   | 2007 | 0.823721 | 0.663589 |
| Mongolia   | 2008 | 0.819758 | 0.675399 |
| Mongolia   | 2009 | 0.832738 | 0.69269  |
| Mongolia   | 2010 | 0.825495 | 0.676345 |
| Mongolia   | 2011 | 0.81695  | 0.665265 |
| Mongolia   | 2012 | 0.819276 | 0.684519 |
| Mongolia   | 2013 | 0.808343 | 0.682186 |
| Mongolia   | 2014 | 0.795602 | 0.677174 |
| Mongolia   | 2015 | 0.795543 | 0.676357 |
| Mongolia   | 2016 | 0.790086 | 0.663606 |
| Mongolia   | 2017 | 0.794348 | 0.661505 |
| Mongolia   | 2018 | 0.793758 | 0.653293 |
| Mongolia   | 2019 | 0.788673 | 0.633037 |
| Montenegro | 1990 | 0.730016 | 0.531763 |
| Montenegro | 1991 | 0.733277 | 0.528923 |
| Montenegro | 1992 | 0.752784 | 0.539443 |
| Montenegro | 1993 | 0.760196 | 0.546079 |
| Montenegro | 1994 | 0.793137 | 0.571782 |
| Montenegro | 1995 | 0.803658 | 0.58153  |

|    |            |      |          |          |
|----|------------|------|----------|----------|
| 1  |            |      |          |          |
| 2  |            |      |          |          |
| 3  |            |      |          |          |
| 4  |            |      |          |          |
| 5  | Montenegro | 1996 | 0.816688 | 0.593459 |
| 6  | Montenegro | 1997 | 0.803945 | 0.587557 |
| 7  | Montenegro | 1998 | 0.800749 | 0.587413 |
| 8  | Montenegro | 1999 | 0.806197 | 0.590958 |
| 9  | Montenegro | 2000 | 0.831277 | 0.61343  |
| 10 | Montenegro | 2001 | 0.83478  | 0.624572 |
| 11 | Montenegro | 2002 | 0.812396 | 0.611387 |
| 12 | Montenegro | 2003 | 0.800159 | 0.604112 |
| 13 | Montenegro | 2004 | 0.776479 | 0.583612 |
| 14 | Montenegro | 2005 | 0.749911 | 0.558299 |
| 15 | Montenegro | 2006 | 0.761925 | 0.567128 |
| 16 | Montenegro | 2007 | 0.800333 | 0.592415 |
| 17 | Montenegro | 2008 | 0.829676 | 0.616523 |
| 18 | Montenegro | 2009 | 0.849739 | 0.637266 |
| 19 | Montenegro | 2010 | 0.862346 | 0.649889 |
| 20 | Montenegro | 2011 | 0.845212 | 0.642788 |
| 21 | Montenegro | 2012 | 0.851893 | 0.648937 |
| 22 | Montenegro | 2013 | 0.843268 | 0.645223 |
| 23 | Montenegro | 2014 | 0.848705 | 0.651204 |
| 24 | Montenegro | 2015 | 0.842623 | 0.641021 |
| 25 | Montenegro | 2016 | 0.809543 | 0.606147 |
| 26 | Montenegro | 2017 | 0.802626 | 0.594613 |
| 27 | Montenegro | 2018 | 0.825529 | 0.60972  |
| 28 | Montenegro | 2019 | 0.810302 | 0.592792 |
| 29 | Morocco    | 1990 | 0.99491  | 0.878909 |
| 30 |            |      |          |          |
| 31 |            |      |          |          |
| 32 |            |      |          |          |
| 33 |            |      |          |          |
| 34 |            |      |          |          |
| 35 |            |      |          |          |
| 36 |            |      |          |          |
| 37 |            |      |          |          |
| 38 |            |      |          |          |
| 39 |            |      |          |          |
| 40 |            |      |          |          |
| 41 |            |      |          |          |
| 42 |            |      |          |          |
| 43 |            |      |          |          |
| 44 |            |      |          |          |
| 45 |            |      |          |          |
| 46 |            |      |          |          |

|         |      |          |          |
|---------|------|----------|----------|
| Morocco | 1991 | 0.991678 | 0.881717 |
| Morocco | 1992 | 0.946036 | 0.847594 |
| Morocco | 1993 | 0.935928 | 0.840068 |
| Morocco | 1994 | 0.94912  | 0.849024 |
| Morocco | 1995 | 0.952789 | 0.849879 |
| Morocco | 1996 | 0.973631 | 0.873777 |
| Morocco | 1997 | 0.987708 | 0.885371 |
| Morocco | 1998 | 0.96864  | 0.862799 |
| Morocco | 1999 | 0.966075 | 0.851575 |
| Morocco | 2000 | 1.027192 | 0.934749 |
| Morocco | 2001 | 1.1055   | 1.039632 |
| Morocco | 2002 | 1.172219 | 1.105859 |
| Morocco | 2003 | 1.178042 | 1.112077 |
| Morocco | 2004 | 1.210291 | 1.158825 |
| Morocco | 2005 | 1.232854 | 1.193653 |
| Morocco | 2006 | 1.241772 | 1.213695 |
| Morocco | 2007 | 1.25736  | 1.236321 |
| Morocco | 2008 | 1.258971 | 1.247946 |
| Morocco | 2009 | 1.258156 | 1.25791  |
| Morocco | 2010 | 1.260311 | 1.270169 |
| Morocco | 2011 | 1.257748 | 1.277081 |
| Morocco | 2012 | 1.235274 | 1.256931 |
| Morocco | 2013 | 1.049889 | 1.040043 |
| Morocco | 2014 | 1.068511 | 1.042004 |
| Morocco | 2015 | 1.085833 | 1.043414 |

|            |      |          |          |
|------------|------|----------|----------|
| Morocco    | 2016 | 1.097535 | 1.040243 |
| Morocco    | 2017 | 1.107104 | 1.035671 |
| Morocco    | 2018 | 1.112476 | 1.03045  |
| Morocco    | 2019 | 1.116306 | 1.025441 |
| Mozambique | 1990 | 0.7455   | 0.632955 |
| Mozambique | 1991 | 0.740092 | 0.623329 |
| Mozambique | 1992 | 0.735712 | 0.617705 |
| Mozambique | 1993 | 0.723898 | 0.608977 |
| Mozambique | 1994 | 0.719732 | 0.605701 |
| Mozambique | 1995 | 0.713228 | 0.598496 |
| Mozambique | 1996 | 0.714012 | 0.596174 |
| Mozambique | 1997 | 0.715332 | 0.594212 |
| Mozambique | 1998 | 0.710254 | 0.587737 |
| Mozambique | 1999 | 0.702769 | 0.579659 |
| Mozambique | 2000 | 0.692727 | 0.56899  |
| Mozambique | 2001 | 0.678268 | 0.555227 |
| Mozambique | 2002 | 0.669768 | 0.545593 |
| Mozambique | 2003 | 0.664322 | 0.539428 |
| Mozambique | 2004 | 0.664309 | 0.538267 |
| Mozambique | 2005 | 0.67067  | 0.543276 |
| Mozambique | 2006 | 0.666668 | 0.537137 |
| Mozambique | 2007 | 0.666481 | 0.536097 |
| Mozambique | 2008 | 0.66311  | 0.534174 |
| Mozambique | 2009 | 0.663878 | 0.535535 |
| Mozambique | 2010 | 0.664697 | 0.536946 |

1  
2  
3  
4  
5  
6  
7  
8  
9  
10  
11  
12  
13  
14  
15  
16  
17  
18  
19  
20  
21  
22  
23  
24  
25  
26  
27  
28  
29  
30  
31  
32  
33  
34  
35  
36  
37  
38  
39  
40  
41  
42  
43  
44  
45  
46

|            |      |          |          |
|------------|------|----------|----------|
| Mozambique | 2011 | 0.665384 | 0.538654 |
| Mozambique | 2012 | 0.666639 | 0.540631 |
| Mozambique | 2013 | 0.667253 | 0.542927 |
| Mozambique | 2014 | 0.670594 | 0.547312 |
| Mozambique | 2015 | 0.676028 | 0.553124 |
| Mozambique | 2016 | 0.678167 | 0.557826 |
| Mozambique | 2017 | 0.68422  | 0.56494  |
| Mozambique | 2018 | 0.686623 | 0.567848 |
| Mozambique | 2019 | 0.689936 | 0.571072 |
| Myanmar    | 1990 | 1.18372  | 0.956469 |
| Myanmar    | 1991 | 1.186191 | 0.955607 |
| Myanmar    | 1992 | 1.19093  | 0.957006 |
| Myanmar    | 1993 | 1.194359 | 0.957396 |
| Myanmar    | 1994 | 1.1991   | 0.959002 |
| Myanmar    | 1995 | 1.201551 | 0.957968 |
| Myanmar    | 1996 | 1.201112 | 0.955698 |
| Myanmar    | 1997 | 1.200431 | 0.953416 |
| Myanmar    | 1998 | 1.201065 | 0.952161 |
| Myanmar    | 1999 | 1.200264 | 0.950136 |
| Myanmar    | 2000 | 1.205709 | 0.953426 |
| Myanmar    | 2001 | 1.200051 | 0.949125 |
| Myanmar    | 2002 | 1.197862 | 0.947276 |
| Myanmar    | 2003 | 1.20639  | 0.952919 |
| Myanmar    | 2004 | 1.192564 | 0.942485 |
| Myanmar    | 2005 | 1.178545 | 0.930368 |

|    |         |      |          |          |
|----|---------|------|----------|----------|
| 1  |         |      |          |          |
| 2  |         |      |          |          |
| 3  |         |      |          |          |
| 4  |         |      |          |          |
| 5  | Myanmar | 2006 | 1.17357  | 0.924872 |
| 6  | Myanmar | 2007 | 1.161685 | 0.914034 |
| 7  | Myanmar | 2008 | 1.150781 | 0.9032   |
| 8  | Myanmar | 2009 | 1.127682 | 0.883668 |
| 9  | Myanmar | 2010 | 1.099544 | 0.859687 |
| 10 | Myanmar | 2011 | 1.071159 | 0.835402 |
| 11 | Myanmar | 2012 | 1.05088  | 0.816291 |
| 12 | Myanmar | 2013 | 1.050014 | 0.812047 |
| 13 | Myanmar | 2014 | 1.048675 | 0.807729 |
| 14 | Myanmar | 2015 | 1.048365 | 0.80387  |
| 15 | Myanmar | 2016 | 1.049722 | 0.801738 |
| 16 | Myanmar | 2017 | 1.060853 | 0.807818 |
| 17 | Myanmar | 2018 | 1.06684  | 0.8106   |
| 18 | Myanmar | 2019 | 1.070598 | 0.810062 |
| 19 | Namibia | 1990 | 0.520952 | 0.414139 |
| 20 | Namibia | 1991 | 0.518697 | 0.41023  |
| 21 | Namibia | 1992 | 0.514996 | 0.405404 |
| 22 | Namibia | 1993 | 0.516465 | 0.404232 |
| 23 | Namibia | 1994 | 0.514588 | 0.401503 |
| 24 | Namibia | 1995 | 0.514977 | 0.400811 |
| 25 | Namibia | 1996 | 0.512347 | 0.398035 |
| 26 | Namibia | 1997 | 0.520707 | 0.40232  |
| 27 | Namibia | 1998 | 0.528704 | 0.406669 |
| 28 | Namibia | 1999 | 0.536913 | 0.411569 |
| 29 | Namibia | 2000 | 0.542403 | 0.414466 |
| 30 |         |      |          |          |
| 31 |         |      |          |          |
| 32 |         |      |          |          |
| 33 |         |      |          |          |
| 34 |         |      |          |          |
| 35 |         |      |          |          |
| 36 |         |      |          |          |
| 37 |         |      |          |          |
| 38 |         |      |          |          |
| 39 |         |      |          |          |
| 40 |         |      |          |          |
| 41 |         |      |          |          |
| 42 |         |      |          |          |
| 43 |         |      |          |          |
| 44 |         |      |          |          |
| 45 |         |      |          |          |
| 46 |         |      |          |          |

1  
2  
3  
4  
5  
6  
7  
8  
9  
10  
11  
12  
13  
14  
15  
16  
17  
18  
19  
20  
21  
22  
23  
24  
25  
26  
27  
28  
29  
30  
31  
32  
33  
34  
35  
36  
37  
38  
39  
40  
41  
42  
43  
44  
45  
46

|         |      |          |          |
|---------|------|----------|----------|
| Namibia | 2001 | 0.536134 | 0.40849  |
| Namibia | 2002 | 0.535634 | 0.406544 |
| Namibia | 2003 | 0.527334 | 0.398785 |
| Namibia | 2004 | 0.515515 | 0.38807  |
| Namibia | 2005 | 0.50934  | 0.380508 |
| Namibia | 2006 | 0.512883 | 0.379323 |
| Namibia | 2007 | 0.520243 | 0.380621 |
| Namibia | 2008 | 0.525957 | 0.380947 |
| Namibia | 2009 | 0.537255 | 0.385315 |
| Namibia | 2010 | 0.542963 | 0.386363 |
| Namibia | 2011 | 0.547274 | 0.385731 |
| Namibia | 2012 | 0.562226 | 0.393271 |
| Namibia | 2013 | 0.570154 | 0.396655 |
| Namibia | 2014 | 0.579949 | 0.402086 |
| Namibia | 2015 | 0.589423 | 0.407695 |
| Namibia | 2016 | 0.596258 | 0.411905 |
| Namibia | 2017 | 0.601077 | 0.414841 |
| Namibia | 2018 | 0.606703 | 0.418179 |
| Namibia | 2019 | 0.61335  | 0.422065 |
| Nauru   | 1990 | 0.841129 | 0.90935  |
| Nauru   | 1991 | 0.836849 | 0.90501  |
| Nauru   | 1992 | 0.838949 | 0.908351 |
| Nauru   | 1993 | 0.81655  | 0.888291 |
| Nauru   | 1994 | 0.827685 | 0.897083 |
| Nauru   | 1995 | 0.825315 | 0.892624 |

|       |      |          |          |
|-------|------|----------|----------|
| Nauru | 1996 | 0.835952 | 0.896632 |
| Nauru | 1997 | 0.847038 | 0.900004 |
| Nauru | 1998 | 0.859692 | 0.901619 |
| Nauru | 1999 | 0.855559 | 0.887218 |
| Nauru | 2000 | 0.855925 | 0.875318 |
| Nauru | 2001 | 0.857772 | 0.863824 |
| Nauru | 2002 | 0.845386 | 0.844801 |
| Nauru | 2003 | 0.839563 | 0.830172 |
| Nauru | 2004 | 0.843791 | 0.82551  |
| Nauru | 2005 | 0.830454 | 0.805166 |
| Nauru | 2006 | 0.821763 | 0.78876  |
| Nauru | 2007 | 0.806174 | 0.767626 |
| Nauru | 2008 | 0.793628 | 0.750901 |
| Nauru | 2009 | 0.787585 | 0.740255 |
| Nauru | 2010 | 0.783428 | 0.733114 |
| Nauru | 2011 | 0.782513 | 0.727983 |
| Nauru | 2012 | 0.78002  | 0.722149 |
| Nauru | 2013 | 0.779317 | 0.718327 |
| Nauru | 2014 | 0.776438 | 0.713153 |
| Nauru | 2015 | 0.78012  | 0.712964 |
| Nauru | 2016 | 0.786155 | 0.71382  |
| Nauru | 2017 | 0.797984 | 0.719267 |
| Nauru | 2018 | 0.809922 | 0.723824 |
| Nauru | 2019 | 0.822037 | 0.727821 |
| Nepal | 1990 | 1.006487 | 0.88658  |



1  
2  
3  
4  
5  
6  
7  
8  
9  
10  
11  
12  
13  
14  
15  
16  
17  
18  
19  
20  
21  
22  
23  
24  
25  
26  
27  
28  
29  
30  
31  
32  
33  
34  
35  
36  
37  
38  
39  
40  
41  
42  
43  
44  
45  
46

|       |      |          |          |
|-------|------|----------|----------|
| Nepal | 1991 | 1.008787 | 0.889125 |
| Nepal | 1992 | 1.017032 | 0.897647 |
| Nepal | 1993 | 1.009764 | 0.893959 |
| Nepal | 1994 | 0.999923 | 0.887975 |
| Nepal | 1995 | 0.980684 | 0.874587 |
| Nepal | 1996 | 0.960356 | 0.859834 |
| Nepal | 1997 | 0.932334 | 0.838205 |
| Nepal | 1998 | 0.9169   | 0.826599 |
| Nepal | 1999 | 0.913889 | 0.824936 |
| Nepal | 2000 | 0.891626 | 0.807733 |
| Nepal | 2001 | 0.885184 | 0.803387 |
| Nepal | 2002 | 0.88509  | 0.80353  |
| Nepal | 2003 | 0.886223 | 0.804379 |
| Nepal | 2004 | 0.88261  | 0.801964 |
| Nepal | 2005 | 0.88549  | 0.803022 |
| Nepal | 2006 | 0.885284 | 0.802625 |
| Nepal | 2007 | 0.895269 | 0.810404 |
| Nepal | 2008 | 0.906467 | 0.818901 |
| Nepal | 2009 | 0.920021 | 0.829422 |
| Nepal | 2010 | 0.946883 | 0.850073 |
| Nepal | 2011 | 0.956762 | 0.857514 |
| Nepal | 2012 | 0.976914 | 0.871798 |
| Nepal | 2013 | 0.994293 | 0.883126 |
| Nepal | 2014 | 1.016476 | 0.898038 |
| Nepal | 2015 | 1.035396 | 0.907818 |

|    |             |      |          |          |
|----|-------------|------|----------|----------|
| 1  |             |      |          |          |
| 2  |             |      |          |          |
| 3  |             |      |          |          |
| 4  |             |      |          |          |
| 5  | Nepal       | 2016 | 1.049671 | 0.914186 |
| 6  | Nepal       | 2017 | 1.063584 | 0.920054 |
| 7  | Nepal       | 2018 | 1.076166 | 0.92446  |
| 8  | Nepal       | 2019 | 1.087308 | 0.926945 |
| 9  | Nepal       | 2019 | 1.087308 | 0.926945 |
| 10 | Netherlands | 1990 | 1.447557 | 0.744821 |
| 11 | Netherlands | 1991 | 1.476313 | 0.748788 |
| 12 | Netherlands | 1992 | 1.479029 | 0.741339 |
| 13 | Netherlands | 1993 | 1.466228 | 0.727559 |
| 14 | Netherlands | 1994 | 1.509769 | 0.744292 |
| 15 | Netherlands | 1995 | 1.525182 | 0.750735 |
| 16 | Netherlands | 1996 | 1.511319 | 0.746839 |
| 17 | Netherlands | 1997 | 1.502871 | 0.745412 |
| 18 | Netherlands | 1998 | 1.468095 | 0.728972 |
| 19 | Netherlands | 1999 | 1.439072 | 0.71541  |
| 20 | Netherlands | 2000 | 1.39814  | 0.697868 |
| 21 | Netherlands | 2001 | 1.413555 | 0.709338 |
| 22 | Netherlands | 2002 | 1.425754 | 0.719386 |
| 23 | Netherlands | 2003 | 1.388924 | 0.704545 |
| 24 | Netherlands | 2004 | 1.400944 | 0.709384 |
| 25 | Netherlands | 2005 | 1.401287 | 0.709922 |
| 26 | Netherlands | 2006 | 1.401839 | 0.710847 |
| 27 | Netherlands | 2007 | 1.402669 | 0.714385 |
| 28 | Netherlands | 2008 | 1.406942 | 0.72216  |
| 29 | Netherlands | 2009 | 1.40736  | 0.727049 |
| 30 | Netherlands | 2010 | 1.421272 | 0.736793 |
| 31 |             |      |          |          |
| 32 |             |      |          |          |
| 33 |             |      |          |          |
| 34 |             |      |          |          |
| 35 |             |      |          |          |
| 36 |             |      |          |          |
| 37 |             |      |          |          |
| 38 |             |      |          |          |
| 39 |             |      |          |          |
| 40 |             |      |          |          |
| 41 |             |      |          |          |
| 42 |             |      |          |          |
| 43 |             |      |          |          |
| 44 |             |      |          |          |
| 45 |             |      |          |          |
| 46 |             |      |          |          |

1  
2  
3  
4  
5  
6  
7  
8  
9  
10  
11  
12  
13  
14  
15  
16  
17  
18  
19  
20  
21  
22  
23  
24  
25  
26  
27  
28  
29  
30  
31  
32  
33  
34  
35  
36  
37  
38  
39  
40  
41  
42  
43  
44  
45  
46

|             |      |          |          |
|-------------|------|----------|----------|
| Netherlands | 2011 | 1.446806 | 0.757099 |
| Netherlands | 2012 | 1.442136 | 0.762483 |
| Netherlands | 2013 | 1.430792 | 0.767487 |
| Netherlands | 2014 | 1.440957 | 0.786282 |
| Netherlands | 2015 | 1.412873 | 0.785196 |
| Netherlands | 2016 | 1.402363 | 0.791495 |
| Netherlands | 2017 | 1.364227 | 0.786008 |
| Netherlands | 2018 | 1.345275 | 0.792336 |
| Netherlands | 2019 | 1.31752  | 0.791067 |
| New Zealand | 1990 | 1.066192 | 0.705987 |
| New Zealand | 1991 | 1.063794 | 0.698293 |
| New Zealand | 1992 | 0.993804 | 0.647648 |
| New Zealand | 1993 | 0.990158 | 0.641685 |
| New Zealand | 1994 | 0.975831 | 0.628564 |
| New Zealand | 1995 | 0.987665 | 0.632708 |
| New Zealand | 1996 | 1.006324 | 0.639629 |
| New Zealand | 1997 | 0.977481 | 0.622835 |
| New Zealand | 1998 | 0.981552 | 0.627138 |
| New Zealand | 1999 | 0.975372 | 0.624972 |
| New Zealand | 2000 | 0.962181 | 0.62377  |
| New Zealand | 2001 | 0.943874 | 0.613128 |
| New Zealand | 2002 | 0.97546  | 0.637451 |
| New Zealand | 2003 | 0.971302 | 0.637979 |
| New Zealand | 2004 | 0.993113 | 0.655944 |
| New Zealand | 2005 | 0.992803 | 0.66123  |

|    |             |      |          |          |
|----|-------------|------|----------|----------|
| 1  |             |      |          |          |
| 2  |             |      |          |          |
| 3  |             |      |          |          |
| 4  |             |      |          |          |
| 5  | New Zealand | 2006 | 0.984374 | 0.661881 |
| 6  | New Zealand | 2007 | 0.956275 | 0.65261  |
| 7  | New Zealand | 2008 | 0.960295 | 0.664472 |
| 8  | New Zealand | 2009 | 0.944662 | 0.656956 |
| 9  | New Zealand | 2010 | 0.959474 | 0.671581 |
| 10 | New Zealand | 2011 | 0.954743 | 0.674297 |
| 11 | New Zealand | 2012 | 0.930048 | 0.664193 |
| 12 | New Zealand | 2013 | 0.924215 | 0.667159 |
| 13 | New Zealand | 2014 | 0.91942  | 0.665934 |
| 14 | New Zealand | 2015 | 0.941312 | 0.687821 |
| 15 | New Zealand | 2016 | 0.929588 | 0.68481  |
| 16 | New Zealand | 2017 | 0.927328 | 0.689256 |
| 17 | New Zealand | 2018 | 0.893293 | 0.670898 |
| 18 | New Zealand | 2019 | 0.881984 | 0.667259 |
| 19 | Nicaragua   | 1990 | 0.522688 | 0.397753 |
| 20 | Nicaragua   | 1991 | 0.514671 | 0.395575 |
| 21 | Nicaragua   | 1992 | 0.515144 | 0.395474 |
| 22 | Nicaragua   | 1993 | 0.52376  | 0.401308 |
| 23 | Nicaragua   | 1994 | 0.495389 | 0.382344 |
| 24 | Nicaragua   | 1995 | 0.657199 | 0.544353 |
| 25 | Nicaragua   | 1996 | 0.644636 | 0.542242 |
| 26 | Nicaragua   | 1997 | 0.630431 | 0.535664 |
| 27 | Nicaragua   | 1998 | 0.618795 | 0.531651 |
| 28 | Nicaragua   | 1999 | 0.572153 | 0.497733 |
| 29 | Nicaragua   | 2000 | 0.578434 | 0.508295 |
| 30 |             |      |          |          |
| 31 |             |      |          |          |
| 32 |             |      |          |          |
| 33 |             |      |          |          |
| 34 |             |      |          |          |
| 35 |             |      |          |          |
| 36 |             |      |          |          |
| 37 |             |      |          |          |
| 38 |             |      |          |          |
| 39 |             |      |          |          |
| 40 |             |      |          |          |
| 41 |             |      |          |          |
| 42 |             |      |          |          |
| 43 |             |      |          |          |
| 44 |             |      |          |          |
| 45 |             |      |          |          |
| 46 |             |      |          |          |

|           |      |          |          |
|-----------|------|----------|----------|
| Nicaragua | 2001 | 0.593106 | 0.527615 |
| Nicaragua | 2002 | 0.583986 | 0.525227 |
| Nicaragua | 2003 | 0.551447 | 0.49958  |
| Nicaragua | 2004 | 0.557455 | 0.50602  |
| Nicaragua | 2005 | 0.538036 | 0.48986  |
| Nicaragua | 2006 | 0.52597  | 0.477105 |
| Nicaragua | 2007 | 0.544361 | 0.49303  |
| Nicaragua | 2008 | 0.539564 | 0.48876  |
| Nicaragua | 2009 | 0.545132 | 0.49153  |
| Nicaragua | 2010 | 0.550934 | 0.493435 |
| Nicaragua | 2011 | 0.535405 | 0.477532 |
| Nicaragua | 2012 | 0.522062 | 0.46299  |
| Nicaragua | 2013 | 0.524102 | 0.460842 |
| Nicaragua | 2014 | 0.537312 | 0.467204 |
| Nicaragua | 2015 | 0.557047 | 0.479269 |
| Nicaragua | 2016 | 0.541955 | 0.463483 |
| Nicaragua | 2017 | 0.558139 | 0.471183 |
| Nicaragua | 2018 | 0.560598 | 0.468403 |
| Nicaragua | 2019 | 0.562831 | 0.466458 |
| Niger     | 1990 | 0.810415 | 0.758079 |
| Niger     | 1991 | 0.826226 | 0.773965 |
| Niger     | 1992 | 0.838852 | 0.788117 |
| Niger     | 1993 | 0.845358 | 0.798159 |
| Niger     | 1994 | 0.855762 | 0.808671 |
| Niger     | 1995 | 0.860737 | 0.809156 |

|    |         |      |          |          |
|----|---------|------|----------|----------|
| 1  |         |      |          |          |
| 2  |         |      |          |          |
| 3  |         |      |          |          |
| 4  |         |      |          |          |
| 5  | Niger   | 1996 | 0.856771 | 0.807281 |
| 6  | Niger   | 1997 | 0.855472 | 0.806414 |
| 7  | Niger   | 1998 | 0.843432 | 0.798485 |
| 8  | Niger   | 1999 | 0.828745 | 0.782915 |
| 9  | Niger   | 2000 | 0.819592 | 0.771369 |
| 10 | Niger   | 2001 | 0.806746 | 0.759651 |
| 11 | Niger   | 2002 | 0.797001 | 0.752312 |
| 12 | Niger   | 2003 | 0.787058 | 0.746425 |
| 13 | Niger   | 2004 | 0.775544 | 0.739366 |
| 14 | Niger   | 2005 | 0.766949 | 0.727909 |
| 15 | Niger   | 2006 | 0.756655 | 0.71908  |
| 16 | Niger   | 2007 | 0.750941 | 0.711134 |
| 17 | Niger   | 2008 | 0.743702 | 0.704064 |
| 18 | Niger   | 2009 | 0.735897 | 0.69378  |
| 19 | Niger   | 2010 | 0.727739 | 0.684338 |
| 20 | Niger   | 2011 | 0.726785 | 0.678833 |
| 21 | Niger   | 2012 | 0.724445 | 0.674636 |
| 22 | Niger   | 2013 | 0.718303 | 0.669687 |
| 23 | Niger   | 2014 | 0.722409 | 0.67305  |
| 24 | Niger   | 2015 | 0.724784 | 0.671592 |
| 25 | Niger   | 2016 | 0.724831 | 0.672213 |
| 26 | Niger   | 2017 | 0.726952 | 0.673326 |
| 27 | Niger   | 2018 | 0.721766 | 0.673434 |
| 28 | Niger   | 2019 | 0.724118 | 0.675679 |
| 29 | Nigeria | 1990 | 0.942702 | 0.872561 |
| 30 |         |      |          |          |
| 31 |         |      |          |          |
| 32 |         |      |          |          |
| 33 |         |      |          |          |
| 34 |         |      |          |          |
| 35 |         |      |          |          |
| 36 |         |      |          |          |
| 37 |         |      |          |          |
| 38 |         |      |          |          |
| 39 |         |      |          |          |
| 40 |         |      |          |          |
| 41 |         |      |          |          |
| 42 |         |      |          |          |
| 43 |         |      |          |          |
| 44 |         |      |          |          |
| 45 |         |      |          |          |
| 46 |         |      |          |          |

1  
2  
3  
4  
5  
6  
7  
8  
9  
10  
11  
12  
13  
14  
15  
16  
17  
18  
19  
20  
21  
22  
23  
24  
25  
26  
27  
28  
29  
30  
31  
32  
33  
34  
35  
36  
37  
38  
39  
40  
41  
42  
43  
44  
45  
46

|         |      |          |          |
|---------|------|----------|----------|
| Nigeria | 1991 | 0.934436 | 0.872282 |
| Nigeria | 1992 | 0.924894 | 0.872943 |
| Nigeria | 1993 | 0.914077 | 0.870767 |
| Nigeria | 1994 | 0.906826 | 0.871447 |
| Nigeria | 1995 | 0.895881 | 0.866064 |
| Nigeria | 1996 | 0.885105 | 0.861683 |
| Nigeria | 1997 | 0.881762 | 0.864812 |
| Nigeria | 1998 | 0.87083  | 0.860374 |
| Nigeria | 1999 | 0.852298 | 0.847813 |
| Nigeria | 2000 | 0.834291 | 0.834275 |
| Nigeria | 2001 | 0.819429 | 0.824864 |
| Nigeria | 2002 | 0.807634 | 0.81888  |
| Nigeria | 2003 | 0.793461 | 0.811085 |
| Nigeria | 2004 | 0.783844 | 0.806558 |
| Nigeria | 2005 | 0.771572 | 0.797225 |
| Nigeria | 2006 | 0.765569 | 0.792637 |
| Nigeria | 2007 | 0.759324 | 0.78688  |
| Nigeria | 2008 | 0.75287  | 0.779753 |
| Nigeria | 2009 | 0.745507 | 0.769981 |
| Nigeria | 2010 | 0.736712 | 0.759652 |
| Nigeria | 2011 | 0.734046 | 0.753786 |
| Nigeria | 2012 | 0.737838 | 0.751281 |
| Nigeria | 2013 | 0.734996 | 0.740608 |
| Nigeria | 2014 | 0.742661 | 0.740121 |
| Nigeria | 2015 | 0.754025 | 0.743835 |

|    |         |      |          |          |
|----|---------|------|----------|----------|
| 1  |         |      |          |          |
| 2  |         |      |          |          |
| 3  |         |      |          |          |
| 4  |         |      |          |          |
| 5  | Nigeria | 2016 | 0.763335 | 0.745167 |
| 6  | Nigeria | 2017 | 0.778616 | 0.75156  |
| 7  | Nigeria | 2018 | 0.793522 | 0.757511 |
| 8  | Nigeria | 2019 | 0.810217 | 0.764132 |
| 9  | Niue    | 1990 | 1.190231 | 0.775411 |
| 10 | Niue    | 1991 | 1.194033 | 0.789915 |
| 11 | Niue    | 1992 | 1.207319 | 0.812242 |
| 12 | Niue    | 1993 | 1.20373  | 0.823011 |
| 13 | Niue    | 1994 | 1.178585 | 0.817084 |
| 14 | Niue    | 1995 | 1.157887 | 0.813367 |
| 15 | Niue    | 1996 | 1.143385 | 0.814647 |
| 16 | Niue    | 1997 | 1.133241 | 0.820008 |
| 17 | Niue    | 1998 | 1.099876 | 0.807742 |
| 18 | Niue    | 1999 | 1.073953 | 0.798718 |
| 19 | Niue    | 2000 | 1.048715 | 0.788429 |
| 20 | Niue    | 2001 | 1.012068 | 0.767538 |
| 21 | Niue    | 2002 | 1.005777 | 0.76615  |
| 22 | Niue    | 2003 | 0.992871 | 0.757578 |
| 23 | Niue    | 2004 | 1.011142 | 0.772571 |
| 24 | Niue    | 2005 | 0.978883 | 0.747352 |
| 25 | Niue    | 2006 | 0.972596 | 0.743419 |
| 26 | Niue    | 2007 | 0.95894  | 0.733977 |
| 27 | Niue    | 2008 | 0.95539  | 0.73326  |
| 28 | Niue    | 2009 | 0.939876 | 0.721684 |
| 29 | Niue    | 2010 | 0.926776 | 0.71016  |
| 30 |         |      |          |          |
| 31 |         |      |          |          |
| 32 |         |      |          |          |
| 33 |         |      |          |          |
| 34 |         |      |          |          |
| 35 |         |      |          |          |
| 36 |         |      |          |          |
| 37 |         |      |          |          |
| 38 |         |      |          |          |
| 39 |         |      |          |          |
| 40 |         |      |          |          |
| 41 |         |      |          |          |
| 42 |         |      |          |          |
| 43 |         |      |          |          |
| 44 |         |      |          |          |
| 45 |         |      |          |          |
| 46 |         |      |          |          |



1  
2  
3  
4  
5  
6  
7  
8  
9  
10  
11  
12  
13  
14  
15  
16  
17  
18  
19  
20  
21  
22  
23  
24  
25  
26  
27  
28  
29  
30  
31  
32  
33  
34  
35  
36  
37  
38  
39  
40  
41  
42  
43  
44  
45  
46

|                 |      |          |          |
|-----------------|------|----------|----------|
| Niue            | 2011 | 0.91639  | 0.701185 |
| Niue            | 2012 | 0.907389 | 0.69404  |
| Niue            | 2013 | 0.901788 | 0.689627 |
| Niue            | 2014 | 0.895694 | 0.683761 |
| Niue            | 2015 | 0.894766 | 0.680007 |
| Niue            | 2016 | 0.892505 | 0.676161 |
| Niue            | 2017 | 0.893889 | 0.676244 |
| Niue            | 2018 | 0.890768 | 0.674944 |
| Niue            | 2019 | 0.887772 | 0.673264 |
| North Macedonia | 1990 | 0.680204 | 0.58975  |
| North Macedonia | 1991 | 0.68378  | 0.5956   |
| North Macedonia | 1992 | 0.664624 | 0.571964 |
| North Macedonia | 1993 | 0.644703 | 0.547151 |
| North Macedonia | 1994 | 0.663149 | 0.555907 |
| North Macedonia | 1995 | 0.671096 | 0.552266 |
| North Macedonia | 1996 | 0.695813 | 0.563928 |
| North Macedonia | 1997 | 0.741597 | 0.594207 |
| North Macedonia | 1998 | 0.771646 | 0.617339 |
| North Macedonia | 1999 | 0.777685 | 0.616422 |
| North Macedonia | 2000 | 0.797954 | 0.622484 |
| North Macedonia | 2001 | 0.778443 | 0.606375 |
| North Macedonia | 2002 | 0.749492 | 0.587121 |
| North Macedonia | 2003 | 0.769429 | 0.60026  |
| North Macedonia | 2004 | 0.792515 | 0.614197 |
| North Macedonia | 2005 | 0.783544 | 0.610202 |

|    |                          |      |          |          |
|----|--------------------------|------|----------|----------|
| 1  |                          |      |          |          |
| 2  |                          |      |          |          |
| 3  |                          |      |          |          |
| 4  |                          |      |          |          |
| 5  | North Macedonia          | 2006 | 0.767706 | 0.60037  |
| 6  | North Macedonia          | 2007 | 0.791232 | 0.612007 |
| 7  | North Macedonia          | 2008 | 0.790856 | 0.612737 |
| 8  | North Macedonia          | 2009 | 0.763725 | 0.598462 |
| 9  | North Macedonia          | 2010 | 0.778915 | 0.614822 |
| 10 | North Macedonia          | 2011 | 0.793147 | 0.637721 |
| 11 | North Macedonia          | 2012 | 0.811289 | 0.66772  |
| 12 | North Macedonia          | 2013 | 0.780544 | 0.642134 |
| 13 | North Macedonia          | 2014 | 0.776893 | 0.636497 |
| 14 | North Macedonia          | 2015 | 0.799244 | 0.654666 |
| 15 | North Macedonia          | 2016 | 0.786323 | 0.643621 |
| 16 | North Macedonia          | 2017 | 0.788026 | 0.643868 |
| 17 | North Macedonia          | 2018 | 0.795756 | 0.652467 |
| 18 | North Macedonia          | 2019 | 0.797522 | 0.654678 |
| 19 | Northern Mariana Islands | 1990 | 0.904061 | 1.155126 |
| 20 | Northern Mariana Islands | 1991 | 0.908144 | 1.156065 |
| 21 | Northern Mariana Islands | 1992 | 0.940581 | 1.169589 |
| 22 | Northern Mariana Islands | 1993 | 0.975433 | 1.173898 |
| 23 | Northern Mariana Islands | 1994 | 1.002007 | 1.17191  |
| 24 | Northern Mariana Islands | 1995 | 1.003151 | 1.154852 |
| 25 | Northern Mariana Islands | 1996 | 0.987202 | 1.126734 |
| 26 | Northern Mariana Islands | 1997 | 0.968009 | 1.097328 |
| 27 | Northern Mariana Islands | 1998 | 0.947527 | 1.065921 |
| 28 | Northern Mariana Islands | 1999 | 0.959593 | 1.066621 |
| 29 | Northern Mariana Islands | 2000 | 0.952837 | 1.060532 |
| 30 |                          |      |          |          |
| 31 |                          |      |          |          |
| 32 |                          |      |          |          |
| 33 |                          |      |          |          |
| 34 |                          |      |          |          |
| 35 |                          |      |          |          |
| 36 |                          |      |          |          |
| 37 |                          |      |          |          |
| 38 |                          |      |          |          |
| 39 |                          |      |          |          |
| 40 |                          |      |          |          |
| 41 |                          |      |          |          |
| 42 |                          |      |          |          |
| 43 |                          |      |          |          |
| 44 |                          |      |          |          |
| 45 |                          |      |          |          |
| 46 |                          |      |          |          |

1  
2  
3  
4  
5  
6  
7  
8  
9  
10  
11  
12  
13  
14  
15  
16  
17  
18  
19  
20  
21  
22  
23  
24  
25  
26  
27  
28  
29  
30  
31  
32  
33  
34  
35  
36  
37  
38  
39  
40  
41  
42  
43  
44  
45  
46

|                          |      |          |          |
|--------------------------|------|----------|----------|
| Northern Mariana Islands | 2001 | 0.991994 | 1.099375 |
| Northern Mariana Islands | 2002 | 0.987834 | 1.094556 |
| Northern Mariana Islands | 2003 | 0.979144 | 1.077003 |
| Northern Mariana Islands | 2004 | 0.978766 | 1.061672 |
| Northern Mariana Islands | 2005 | 0.955494 | 1.027025 |
| Northern Mariana Islands | 2006 | 0.935982 | 1.000809 |
| Northern Mariana Islands | 2007 | 0.897664 | 0.960032 |
| Northern Mariana Islands | 2008 | 0.864887 | 0.927883 |
| Northern Mariana Islands | 2009 | 0.838403 | 0.903614 |
| Northern Mariana Islands | 2010 | 0.815518 | 0.876638 |
| Northern Mariana Islands | 2011 | 0.817938 | 0.865424 |
| Northern Mariana Islands | 2012 | 0.827228 | 0.851935 |
| Northern Mariana Islands | 2013 | 0.852758 | 0.850358 |
| Northern Mariana Islands | 2014 | 0.875267 | 0.849207 |
| Northern Mariana Islands | 2015 | 0.888178 | 0.851222 |
| Northern Mariana Islands | 2016 | 0.885488 | 0.844042 |
| Northern Mariana Islands | 2017 | 0.888524 | 0.842979 |
| Northern Mariana Islands | 2018 | 0.887991 | 0.841535 |
| Northern Mariana Islands | 2019 | 0.885281 | 0.840043 |
| Norway                   | 1990 | 0.75453  | 0.444114 |
| Norway                   | 1991 | 0.76261  | 0.443497 |
| Norway                   | 1992 | 0.753197 | 0.43253  |
| Norway                   | 1993 | 0.762236 | 0.431351 |
| Norway                   | 1994 | 0.781039 | 0.438624 |
| Norway                   | 1995 | 0.763202 | 0.424597 |

|        |      |          |          |
|--------|------|----------|----------|
| Norway | 1996 | 0.758874 | 0.419658 |
| Norway | 1997 | 0.75473  | 0.412952 |
| Norway | 1998 | 0.774382 | 0.420472 |
| Norway | 1999 | 0.804349 | 0.433843 |
| Norway | 2000 | 0.825601 | 0.441517 |
| Norway | 2001 | 0.853106 | 0.453431 |
| Norway | 2002 | 0.867374 | 0.459636 |
| Norway | 2003 | 0.880328 | 0.464835 |
| Norway | 2004 | 0.889531 | 0.470566 |
| Norway | 2005 | 0.89659  | 0.476656 |
| Norway | 2006 | 0.922606 | 0.490047 |
| Norway | 2007 | 0.907665 | 0.483353 |
| Norway | 2008 | 0.911053 | 0.485221 |
| Norway | 2009 | 0.928439 | 0.497259 |
| Norway | 2010 | 0.935386 | 0.504449 |
| Norway | 2011 | 0.92996  | 0.505624 |
| Norway | 2012 | 0.945872 | 0.517948 |
| Norway | 2013 | 0.94377  | 0.523526 |
| Norway | 2014 | 0.921463 | 0.517737 |
| Norway | 2015 | 0.916327 | 0.521282 |
| Norway | 2016 | 0.921739 | 0.532769 |
| Norway | 2017 | 0.936924 | 0.549344 |
| Norway | 2018 | 0.918215 | 0.550188 |
| Norway | 2019 | 0.878137 | 0.537045 |
| Oman   | 1990 | 0.979395 | 0.855588 |

|      |      |          |          |
|------|------|----------|----------|
| Oman | 1991 | 0.973416 | 0.875397 |
| Oman | 1992 | 0.949128 | 0.87044  |
| Oman | 1993 | 0.928445 | 0.864161 |
| Oman | 1994 | 0.918156 | 0.861888 |
| Oman | 1995 | 0.904759 | 0.858133 |
| Oman | 1996 | 0.87801  | 0.851048 |
| Oman | 1997 | 0.854061 | 0.839597 |
| Oman | 1998 | 0.840761 | 0.832031 |
| Oman | 1999 | 0.837351 | 0.831819 |
| Oman | 2000 | 0.834719 | 0.835971 |
| Oman | 2001 | 0.827618 | 0.842637 |
| Oman | 2002 | 0.836788 | 0.865047 |
| Oman | 2003 | 0.845547 | 0.873422 |
| Oman | 2004 | 0.855899 | 0.869597 |
| Oman | 2005 | 0.876488 | 0.894328 |
| Oman | 2006 | 0.881398 | 0.931667 |
| Oman | 2007 | 0.83088  | 0.881098 |
| Oman | 2008 | 0.794738 | 0.829971 |
| Oman | 2009 | 0.813201 | 0.848894 |
| Oman | 2010 | 0.846076 | 0.885023 |
| Oman | 2011 | 0.828041 | 0.880499 |
| Oman | 2012 | 0.795644 | 0.823064 |
| Oman | 2013 | 0.786745 | 0.844324 |
| Oman | 2014 | 0.832188 | 0.90246  |
| Oman | 2015 | 0.831518 | 0.871769 |

|          |      |          |          |
|----------|------|----------|----------|
| Oman     | 2016 | 0.822027 | 0.839947 |
| Oman     | 2017 | 0.850428 | 0.847046 |
| Oman     | 2018 | 0.903009 | 0.894798 |
| Oman     | 2019 | 0.928841 | 0.907248 |
| Pakistan | 1990 | 0.769579 | 0.859356 |
| Pakistan | 1991 | 0.77647  | 0.861193 |
| Pakistan | 1992 | 0.790828 | 0.870807 |
| Pakistan | 1993 | 0.795747 | 0.870075 |
| Pakistan | 1994 | 0.805727 | 0.87484  |
| Pakistan | 1995 | 0.818759 | 0.883548 |
| Pakistan | 1996 | 0.825433 | 0.884969 |
| Pakistan | 1997 | 0.83398  | 0.887684 |
| Pakistan | 1998 | 0.842863 | 0.891115 |
| Pakistan | 1999 | 0.855256 | 0.899086 |
| Pakistan | 2000 | 0.86957  | 0.91118  |
| Pakistan | 2001 | 0.872852 | 0.911187 |
| Pakistan | 2002 | 0.871058 | 0.904883 |
| Pakistan | 2003 | 0.880193 | 0.910245 |
| Pakistan | 2004 | 0.877101 | 0.904079 |
| Pakistan | 2005 | 0.872892 | 0.897924 |
| Pakistan | 2006 | 0.872655 | 0.894325 |
| Pakistan | 2007 | 0.872149 | 0.891288 |
| Pakistan | 2008 | 0.875317 | 0.890402 |
| Pakistan | 2009 | 0.878341 | 0.890376 |
| Pakistan | 2010 | 0.878473 | 0.888904 |

1  
2  
3  
4  
5  
6  
7  
8  
9  
10  
11  
12  
13  
14  
15  
16  
17  
18  
19  
20  
21  
22  
23  
24  
25  
26  
27  
28  
29  
30  
31  
32  
33  
34  
35  
36  
37  
38  
39  
40  
41  
42  
43  
44  
45  
46

|          |      |          |          |
|----------|------|----------|----------|
| Pakistan | 2011 | 0.877758 | 0.884423 |
| Pakistan | 2012 | 0.873696 | 0.878442 |
| Pakistan | 2013 | 0.883067 | 0.885333 |
| Pakistan | 2014 | 0.882844 | 0.883889 |
| Pakistan | 2015 | 0.881913 | 0.881605 |
| Pakistan | 2016 | 0.881354 | 0.879779 |
| Pakistan | 2017 | 0.883992 | 0.881982 |
| Pakistan | 2018 | 0.88619  | 0.884133 |
| Pakistan | 2019 | 0.889084 | 0.887167 |
| Palau    | 1990 | 0.590726 | 0.567074 |
| Palau    | 1991 | 0.592484 | 0.570484 |
| Palau    | 1992 | 0.597138 | 0.577494 |
| Palau    | 1993 | 0.598439 | 0.583652 |
| Palau    | 1994 | 0.607683 | 0.594125 |
| Palau    | 1995 | 0.602122 | 0.598155 |
| Palau    | 1996 | 0.594922 | 0.602471 |
| Palau    | 1997 | 0.583794 | 0.605164 |
| Palau    | 1998 | 0.569959 | 0.607432 |
| Palau    | 1999 | 0.552715 | 0.606219 |
| Palau    | 2000 | 0.535765 | 0.600872 |
| Palau    | 2001 | 0.527349 | 0.594391 |
| Palau    | 2002 | 0.528002 | 0.591384 |
| Palau    | 2003 | 0.527773 | 0.584654 |
| Palau    | 2004 | 0.551456 | 0.599923 |
| Palau    | 2005 | 0.561114 | 0.60323  |

|    |           |      |          |          |
|----|-----------|------|----------|----------|
| 1  |           |      |          |          |
| 2  |           |      |          |          |
| 3  |           |      |          |          |
| 4  |           |      |          |          |
| 5  | Palau     | 2006 | 0.560422 | 0.591128 |
| 6  | Palau     | 2007 | 0.553735 | 0.574366 |
| 7  | Palau     | 2008 | 0.548002 | 0.561176 |
| 8  | Palau     | 2009 | 0.544165 | 0.552275 |
| 9  | Palau     | 2010 | 0.540527 | 0.545934 |
| 10 | Palau     | 2011 | 0.537092 | 0.540225 |
| 11 | Palau     | 2012 | 0.533922 | 0.535625 |
| 12 | Palau     | 2013 | 0.533608 | 0.534197 |
| 13 | Palau     | 2014 | 0.531007 | 0.530978 |
| 14 | Palau     | 2015 | 0.529723 | 0.529574 |
| 15 | Palau     | 2016 | 0.529932 | 0.529197 |
| 16 | Palau     | 2017 | 0.533105 | 0.531537 |
| 17 | Palau     | 2018 | 0.535611 | 0.532533 |
| 18 | Palau     | 2019 | 0.538439 | 0.532765 |
| 19 | Palestine | 1990 | 1.096766 | 0.844508 |
| 20 | Palestine | 1991 | 1.091591 | 0.837304 |
| 21 | Palestine | 1992 | 1.084402 | 0.829288 |
| 22 | Palestine | 1993 | 1.079099 | 0.822787 |
| 23 | Palestine | 1994 | 1.078678 | 0.820767 |
| 24 | Palestine | 1995 | 1.07913  | 0.819914 |
| 25 | Palestine | 1996 | 1.078497 | 0.818714 |
| 26 | Palestine | 1997 | 1.046346 | 0.793599 |
| 27 | Palestine | 1998 | 1.00854  | 0.764127 |
| 28 | Palestine | 1999 | 0.968609 | 0.734114 |
| 29 | Palestine | 2000 | 0.941176 | 0.712675 |
| 30 |           |      |          |          |
| 31 |           |      |          |          |
| 32 |           |      |          |          |
| 33 |           |      |          |          |
| 34 |           |      |          |          |
| 35 |           |      |          |          |
| 36 |           |      |          |          |
| 37 |           |      |          |          |
| 38 |           |      |          |          |
| 39 |           |      |          |          |
| 40 |           |      |          |          |
| 41 |           |      |          |          |
| 42 |           |      |          |          |
| 43 |           |      |          |          |
| 44 |           |      |          |          |
| 45 |           |      |          |          |
| 46 |           |      |          |          |



1  
2  
3  
4  
5  
6  
7  
8  
9  
10  
11  
12  
13  
14  
15  
16  
17  
18  
19  
20  
21  
22  
23  
24  
25  
26  
27  
28  
29  
30  
31  
32  
33  
34  
35  
36  
37  
38  
39  
40  
41  
42  
43  
44  
45  
46

|           |      |          |          |
|-----------|------|----------|----------|
| Palestine | 2001 | 0.911024 | 0.687406 |
| Palestine | 2002 | 0.883868 | 0.663667 |
| Palestine | 2003 | 0.868165 | 0.64945  |
| Palestine | 2004 | 0.866073 | 0.644743 |
| Palestine | 2005 | 0.862481 | 0.641533 |
| Palestine | 2006 | 0.86778  | 0.645021 |
| Palestine | 2007 | 0.888549 | 0.660241 |
| Palestine | 2008 | 0.918877 | 0.687188 |
| Palestine | 2009 | 0.938756 | 0.70351  |
| Palestine | 2010 | 0.97194  | 0.724081 |
| Palestine | 2011 | 0.972628 | 0.724938 |
| Palestine | 2012 | 0.957763 | 0.721228 |
| Palestine | 2013 | 0.962405 | 0.732859 |
| Palestine | 2014 | 0.945347 | 0.721619 |
| Palestine | 2015 | 0.981757 | 0.74991  |
| Palestine | 2016 | 1.030033 | 0.788183 |
| Palestine | 2017 | 1.031354 | 0.790637 |
| Palestine | 2018 | 1.009338 | 0.781943 |
| Palestine | 2019 | 1.007945 | 0.795501 |
| Panama    | 1990 | 0.684806 | 0.673883 |
| Panama    | 1991 | 0.662354 | 0.648572 |
| Panama    | 1992 | 0.682867 | 0.663984 |
| Panama    | 1993 | 0.622521 | 0.60272  |
| Panama    | 1994 | 0.632837 | 0.60781  |
| Panama    | 1995 | 0.609146 | 0.578484 |

|                  |      |          |          |
|------------------|------|----------|----------|
| Panama           | 1996 | 0.649564 | 0.611483 |
| Panama           | 1997 | 0.695155 | 0.650684 |
| Panama           | 1998 | 0.755965 | 0.707313 |
| Panama           | 1999 | 0.726618 | 0.67976  |
| Panama           | 2000 | 0.755907 | 0.704044 |
| Panama           | 2001 | 0.753036 | 0.698864 |
| Panama           | 2002 | 0.744099 | 0.687659 |
| Panama           | 2003 | 0.745748 | 0.685298 |
| Panama           | 2004 | 0.776886 | 0.713745 |
| Panama           | 2005 | 0.74812  | 0.688865 |
| Panama           | 2006 | 0.721141 | 0.662738 |
| Panama           | 2007 | 0.704199 | 0.645755 |
| Panama           | 2008 | 0.673904 | 0.615725 |
| Panama           | 2009 | 0.672603 | 0.61248  |
| Panama           | 2010 | 0.660371 | 0.597237 |
| Panama           | 2011 | 0.680747 | 0.613704 |
| Panama           | 2012 | 0.671265 | 0.603026 |
| Panama           | 2013 | 0.709723 | 0.637278 |
| Panama           | 2014 | 0.703626 | 0.631    |
| Panama           | 2015 | 0.696567 | 0.623082 |
| Panama           | 2016 | 0.695587 | 0.620452 |
| Panama           | 2017 | 0.686796 | 0.611485 |
| Panama           | 2018 | 0.70711  | 0.629843 |
| Panama           | 2019 | 0.702706 | 0.625932 |
| Papua New Guinea | 1990 | 0.510353 | 0.520489 |

|                  |      |          |          |
|------------------|------|----------|----------|
| Papua New Guinea | 1991 | 0.507586 | 0.517922 |
| Papua New Guinea | 1992 | 0.507342 | 0.516734 |
| Papua New Guinea | 1993 | 0.505816 | 0.514488 |
| Papua New Guinea | 1994 | 0.504687 | 0.513087 |
| Papua New Guinea | 1995 | 0.503742 | 0.512226 |
| Papua New Guinea | 1996 | 0.507201 | 0.51616  |
| Papua New Guinea | 1997 | 0.510876 | 0.518938 |
| Papua New Guinea | 1998 | 0.51547  | 0.522528 |
| Papua New Guinea | 1999 | 0.518813 | 0.525667 |
| Papua New Guinea | 2000 | 0.520481 | 0.527957 |
| Papua New Guinea | 2001 | 0.520252 | 0.52839  |
| Papua New Guinea | 2002 | 0.521909 | 0.529584 |
| Papua New Guinea | 2003 | 0.522595 | 0.530408 |
| Papua New Guinea | 2004 | 0.523892 | 0.532711 |
| Papua New Guinea | 2005 | 0.520392 | 0.530805 |
| Papua New Guinea | 2006 | 0.522667 | 0.534894 |
| Papua New Guinea | 2007 | 0.521963 | 0.535709 |
| Papua New Guinea | 2008 | 0.515748 | 0.531163 |
| Papua New Guinea | 2009 | 0.51058  | 0.528153 |
| Papua New Guinea | 2010 | 0.50998  | 0.528219 |
| Papua New Guinea | 2011 | 0.504127 | 0.522987 |
| Papua New Guinea | 2012 | 0.499902 | 0.520138 |
| Papua New Guinea | 2013 | 0.494541 | 0.517163 |
| Papua New Guinea | 2014 | 0.490763 | 0.51518  |
| Papua New Guinea | 2015 | 0.490012 | 0.516154 |

|                  |      |          |          |
|------------------|------|----------|----------|
| Papua New Guinea | 2016 | 0.488799 | 0.517054 |
| Papua New Guinea | 2017 | 0.489673 | 0.518489 |
| Papua New Guinea | 2018 | 0.488274 | 0.517236 |
| Papua New Guinea | 2019 | 0.487062 | 0.516906 |
| Paraguay         | 1990 | 0.87285  | 0.733251 |
| Paraguay         | 1991 | 0.871421 | 0.73538  |
| Paraguay         | 1992 | 0.861984 | 0.731253 |
| Paraguay         | 1993 | 0.893227 | 0.763558 |
| Paraguay         | 1994 | 0.874891 | 0.750756 |
| Paraguay         | 1995 | 0.891905 | 0.767908 |
| Paraguay         | 1996 | 0.894482 | 0.771026 |
| Paraguay         | 1997 | 0.90991  | 0.786707 |
| Paraguay         | 1998 | 0.891224 | 0.772082 |
| Paraguay         | 1999 | 0.892023 | 0.776159 |
| Paraguay         | 2000 | 0.908794 | 0.790837 |
| Paraguay         | 2001 | 0.900237 | 0.782912 |
| Paraguay         | 2002 | 0.900709 | 0.784708 |
| Paraguay         | 2003 | 0.899833 | 0.784946 |
| Paraguay         | 2004 | 0.905188 | 0.78769  |
| Paraguay         | 2005 | 0.906572 | 0.78923  |
| Paraguay         | 2006 | 0.919604 | 0.800699 |
| Paraguay         | 2007 | 0.895242 | 0.778963 |
| Paraguay         | 2008 | 0.8998   | 0.782922 |
| Paraguay         | 2009 | 0.887053 | 0.770607 |
| Paraguay         | 2010 | 0.889014 | 0.769331 |

|    |          |      |          |          |
|----|----------|------|----------|----------|
| 1  |          |      |          |          |
| 2  |          |      |          |          |
| 3  |          |      |          |          |
| 4  |          |      |          |          |
| 5  | Paraguay | 2011 | 0.893574 | 0.772361 |
| 6  | Paraguay | 2012 | 0.880004 | 0.758167 |
| 7  | Paraguay | 2013 | 0.894597 | 0.76836  |
| 8  | Paraguay | 2014 | 0.863302 | 0.743413 |
| 9  | Paraguay | 2015 | 0.829355 | 0.715781 |
| 10 | Paraguay | 2016 | 0.841111 | 0.72518  |
| 11 | Paraguay | 2017 | 0.843696 | 0.726201 |
| 12 | Paraguay | 2018 | 0.843366 | 0.725494 |
| 13 | Paraguay | 2019 | 0.836684 | 0.71842  |
| 14 | Peru     | 1990 | 0.913601 | 0.863955 |
| 15 | Peru     | 1991 | 1.00472  | 0.948777 |
| 16 | Peru     | 1992 | 1.044879 | 0.98688  |
| 17 | Peru     | 1993 | 1.027759 | 0.970272 |
| 18 | Peru     | 1994 | 1.115356 | 1.054376 |
| 19 | Peru     | 1995 | 1.156215 | 1.097468 |
| 20 | Peru     | 1996 | 1.083906 | 1.03572  |
| 21 | Peru     | 1997 | 1.079265 | 1.033944 |
| 22 | Peru     | 1998 | 1.084938 | 1.038903 |
| 23 | Peru     | 1999 | 1.053269 | 1.008394 |
| 24 | Peru     | 2000 | 1.05003  | 1.00284  |
| 25 | Peru     | 2001 | 1.015949 | 0.966888 |
| 26 | Peru     | 2002 | 1.021084 | 0.968834 |
| 27 | Peru     | 2003 | 1.050852 | 0.995309 |
| 28 | Peru     | 2004 | 1.010514 | 0.953906 |
| 29 | Peru     | 2005 | 1.011217 | 0.949196 |
| 30 |          |      |          |          |
| 31 |          |      |          |          |
| 32 |          |      |          |          |
| 33 |          |      |          |          |
| 34 |          |      |          |          |
| 35 |          |      |          |          |
| 36 |          |      |          |          |
| 37 |          |      |          |          |
| 38 |          |      |          |          |
| 39 |          |      |          |          |
| 40 |          |      |          |          |
| 41 |          |      |          |          |
| 42 |          |      |          |          |
| 43 |          |      |          |          |
| 44 |          |      |          |          |
| 45 |          |      |          |          |
| 46 |          |      |          |          |

|             |      |          |          |
|-------------|------|----------|----------|
| Peru        | 2006 | 0.971567 | 0.907069 |
| Peru        | 2007 | 0.93459  | 0.868534 |
| Peru        | 2008 | 0.964408 | 0.891577 |
| Peru        | 2009 | 1.005513 | 0.925821 |
| Peru        | 2010 | 1.016288 | 0.931538 |
| Peru        | 2011 | 1.030177 | 0.940505 |
| Peru        | 2012 | 1.051711 | 0.956412 |
| Peru        | 2013 | 1.058485 | 0.95881  |
| Peru        | 2014 | 1.067343 | 0.963477 |
| Peru        | 2015 | 1.06634  | 0.959772 |
| Peru        | 2016 | 1.074129 | 0.96437  |
| Peru        | 2017 | 1.089316 | 0.975806 |
| Peru        | 2018 | 1.098656 | 0.982166 |
| Peru        | 2019 | 1.110745 | 0.990734 |
| Philippines | 1990 | 0.895381 | 0.902283 |
| Philippines | 1991 | 0.880509 | 0.883263 |
| Philippines | 1992 | 0.881702 | 0.876569 |
| Philippines | 1993 | 0.877133 | 0.864402 |
| Philippines | 1994 | 0.86956  | 0.85266  |
| Philippines | 1995 | 0.87258  | 0.852439 |
| Philippines | 1996 | 0.866278 | 0.838327 |
| Philippines | 1997 | 0.8542   | 0.812544 |
| Philippines | 1998 | 0.847416 | 0.798709 |
| Philippines | 1999 | 0.848855 | 0.801611 |
| Philippines | 2000 | 0.854486 | 0.804787 |

|             |      |          |          |
|-------------|------|----------|----------|
| Philippines | 2001 | 0.854201 | 0.80103  |
| Philippines | 2002 | 0.85769  | 0.80353  |
| Philippines | 2003 | 0.847201 | 0.792661 |
| Philippines | 2004 | 0.843162 | 0.788747 |
| Philippines | 2005 | 0.841734 | 0.787366 |
| Philippines | 2006 | 0.834808 | 0.780353 |
| Philippines | 2007 | 0.832589 | 0.775666 |
| Philippines | 2008 | 0.838592 | 0.777601 |
| Philippines | 2009 | 0.835108 | 0.770345 |
| Philippines | 2010 | 0.829964 | 0.764372 |
| Philippines | 2011 | 0.827424 | 0.758476 |
| Philippines | 2012 | 0.838945 | 0.763847 |
| Philippines | 2013 | 0.85046  | 0.770959 |
| Philippines | 2014 | 0.840941 | 0.760785 |
| Philippines | 2015 | 0.845221 | 0.761678 |
| Philippines | 2016 | 0.843903 | 0.758905 |
| Philippines | 2017 | 0.852911 | 0.768268 |
| Philippines | 2018 | 0.858187 | 0.773633 |
| Philippines | 2019 | 0.859915 | 0.775107 |
| Poland      | 1990 | 0.917881 | 0.594086 |
| Poland      | 1991 | 0.90409  | 0.580834 |
| Poland      | 1992 | 0.919908 | 0.58486  |
| Poland      | 1993 | 0.946987 | 0.594748 |
| Poland      | 1994 | 0.960281 | 0.600366 |
| Poland      | 1995 | 0.958064 | 0.595011 |

|          |      |          |          |
|----------|------|----------|----------|
| Poland   | 1996 | 0.985587 | 0.604305 |
| Poland   | 1997 | 0.999282 | 0.608044 |
| Poland   | 1998 | 1.016292 | 0.611599 |
| Poland   | 1999 | 1.025894 | 0.611673 |
| Poland   | 2000 | 1.053107 | 0.615915 |
| Poland   | 2001 | 1.045756 | 0.604648 |
| Poland   | 2002 | 1.042927 | 0.59748  |
| Poland   | 2003 | 1.038911 | 0.591794 |
| Poland   | 2004 | 1.041969 | 0.592438 |
| Poland   | 2005 | 1.070954 | 0.608519 |
| Poland   | 2006 | 1.101807 | 0.627874 |
| Poland   | 2007 | 1.126684 | 0.643817 |
| Poland   | 2008 | 1.09441  | 0.626611 |
| Poland   | 2009 | 1.086273 | 0.622186 |
| Poland   | 2010 | 1.050341 | 0.600421 |
| Poland   | 2011 | 1.022768 | 0.5837   |
| Poland   | 2012 | 1.045657 | 0.594587 |
| Poland   | 2013 | 1.06034  | 0.600538 |
| Poland   | 2014 | 1.095376 | 0.617875 |
| Poland   | 2015 | 1.090725 | 0.612589 |
| Poland   | 2016 | 1.085856 | 0.609823 |
| Poland   | 2017 | 1.063426 | 0.59996  |
| Poland   | 2018 | 1.053713 | 0.59652  |
| Poland   | 2019 | 1.043147 | 0.59288  |
| Portugal | 1990 | 0.884262 | 0.543926 |



|          |      |          |          |
|----------|------|----------|----------|
| Portugal | 1991 | 0.890398 | 0.549614 |
| Portugal | 1992 | 0.887748 | 0.548645 |
| Portugal | 1993 | 0.905257 | 0.559067 |
| Portugal | 1994 | 0.934888 | 0.578709 |
| Portugal | 1995 | 0.954761 | 0.593079 |
| Portugal | 1996 | 0.955694 | 0.595236 |
| Portugal | 1997 | 0.983491 | 0.612126 |
| Portugal | 1998 | 0.9847   | 0.611874 |
| Portugal | 1999 | 0.994401 | 0.611865 |
| Portugal | 2000 | 1.014619 | 0.622443 |
| Portugal | 2001 | 1.023922 | 0.627747 |
| Portugal | 2002 | 1.046333 | 0.641815 |
| Portugal | 2003 | 1.071809 | 0.658259 |
| Portugal | 2004 | 1.082705 | 0.665587 |
| Portugal | 2005 | 1.100718 | 0.675084 |
| Portugal | 2006 | 1.117627 | 0.682107 |
| Portugal | 2007 | 1.12877  | 0.685484 |
| Portugal | 2008 | 1.135725 | 0.684655 |
| Portugal | 2009 | 1.158093 | 0.693652 |
| Portugal | 2010 | 1.181695 | 0.701173 |
| Portugal | 2011 | 1.212089 | 0.712886 |
| Portugal | 2012 | 1.214154 | 0.709169 |
| Portugal | 2013 | 1.223854 | 0.710161 |
| Portugal | 2014 | 1.23894  | 0.71278  |
| Portugal | 2015 | 1.253346 | 0.718468 |

|             |      |          |          |
|-------------|------|----------|----------|
| Portugal    | 2016 | 1.250497 | 0.714503 |
| Portugal    | 2017 | 1.242519 | 0.710662 |
| Portugal    | 2018 | 1.247566 | 0.715337 |
| Portugal    | 2019 | 1.242236 | 0.713636 |
| Puerto Rico | 1990 | 0.80275  | 0.669891 |
| Puerto Rico | 1991 | 0.809018 | 0.669491 |
| Puerto Rico | 1992 | 0.805713 | 0.661874 |
| Puerto Rico | 1993 | 0.80907  | 0.659305 |
| Puerto Rico | 1994 | 0.823879 | 0.665447 |
| Puerto Rico | 1995 | 0.795614 | 0.637683 |
| Puerto Rico | 1996 | 0.821616 | 0.653485 |
| Puerto Rico | 1997 | 0.806042 | 0.636572 |
| Puerto Rico | 1998 | 0.783507 | 0.61465  |
| Puerto Rico | 1999 | 0.830368 | 0.646628 |
| Puerto Rico | 2000 | 0.847044 | 0.655127 |
| Puerto Rico | 2001 | 0.813541 | 0.623902 |
| Puerto Rico | 2002 | 0.837027 | 0.636125 |
| Puerto Rico | 2003 | 0.849227 | 0.641471 |
| Puerto Rico | 2004 | 0.851207 | 0.638502 |
| Puerto Rico | 2005 | 0.819532 | 0.609731 |
| Puerto Rico | 2006 | 0.828059 | 0.610677 |
| Puerto Rico | 2007 | 0.851411 | 0.623053 |
| Puerto Rico | 2008 | 0.870717 | 0.634801 |
| Puerto Rico | 2009 | 0.835635 | 0.606872 |
| Puerto Rico | 2010 | 0.873679 | 0.632793 |

|             |      |          |          |
|-------------|------|----------|----------|
| Puerto Rico | 2011 | 0.865857 | 0.627258 |
| Puerto Rico | 2012 | 0.864947 | 0.620861 |
| Puerto Rico | 2013 | 0.87645  | 0.628923 |
| Puerto Rico | 2014 | 0.887603 | 0.635695 |
| Puerto Rico | 2015 | 0.868531 | 0.617416 |
| Puerto Rico | 2016 | 0.888741 | 0.631972 |
| Puerto Rico | 2017 | 0.888622 | 0.629582 |
| Puerto Rico | 2018 | 0.911225 | 0.642743 |
| Puerto Rico | 2019 | 0.924823 | 0.650285 |
| Qatar       | 1990 | 0.952955 | 1.265583 |
| Qatar       | 1991 | 0.901362 | 1.196006 |
| Qatar       | 1992 | 0.878474 | 1.194201 |
| Qatar       | 1993 | 0.898298 | 1.317721 |
| Qatar       | 1994 | 0.910554 | 1.544928 |
| Qatar       | 1995 | 0.875373 | 1.597969 |
| Qatar       | 1996 | 0.813587 | 1.370316 |
| Qatar       | 1997 | 0.763374 | 1.260175 |
| Qatar       | 1998 | 0.741687 | 1.250523 |
| Qatar       | 1999 | 0.752939 | 1.33758  |
| Qatar       | 2000 | 0.763105 | 1.470088 |
| Qatar       | 2001 | 0.776966 | 1.566502 |
| Qatar       | 2002 | 0.775655 | 1.635752 |
| Qatar       | 2003 | 0.76026  | 1.672719 |
| Qatar       | 2004 | 0.769387 | 1.81363  |
| Qatar       | 2005 | 0.780175 | 1.889947 |

|    |                   |      |          |          |
|----|-------------------|------|----------|----------|
| 1  |                   |      |          |          |
| 2  |                   |      |          |          |
| 3  |                   |      |          |          |
| 4  |                   |      |          |          |
| 5  | Qatar             | 2006 | 0.75546  | 1.899169 |
| 6  | Qatar             | 2007 | 0.740074 | 1.926302 |
| 7  | Qatar             | 2008 | 0.708016 | 1.953539 |
| 8  | Qatar             | 2009 | 0.686412 | 2.077397 |
| 9  | Qatar             | 2010 | 0.675395 | 2.109451 |
| 10 | Qatar             | 2011 | 0.652704 | 2.009032 |
| 11 | Qatar             | 2012 | 0.635437 | 1.934902 |
| 12 | Qatar             | 2013 | 0.645644 | 1.98802  |
| 13 | Qatar             | 2014 | 0.649426 | 1.950938 |
| 14 | Qatar             | 2015 | 0.59925  | 1.734004 |
| 15 | Qatar             | 2016 | 0.609361 | 1.770803 |
| 16 | Qatar             | 2017 | 0.624812 | 1.811416 |
| 17 | Qatar             | 2018 | 0.631227 | 1.877501 |
| 18 | Qatar             | 2019 | 0.623123 | 1.904559 |
| 19 | Republic of Korea | 1990 | 0.857258 | 0.549206 |
| 20 | Republic of Korea | 1991 | 0.875952 | 0.551973 |
| 21 | Republic of Korea | 1992 | 0.905363 | 0.563273 |
| 22 | Republic of Korea | 1993 | 0.922645 | 0.569835 |
| 23 | Republic of Korea | 1994 | 0.927687 | 0.567936 |
| 24 | Republic of Korea | 1995 | 0.968644 | 0.600595 |
| 25 | Republic of Korea | 1996 | 0.983011 | 0.618658 |
| 26 | Republic of Korea | 1997 | 1.005261 | 0.628044 |
| 27 | Republic of Korea | 1998 | 1.022196 | 0.634332 |
| 28 | Republic of Korea | 1999 | 1.047436 | 0.6421   |
| 29 | Republic of Korea | 2000 | 1.072308 | 0.652147 |
| 30 |                   |      |          |          |
| 31 |                   |      |          |          |
| 32 |                   |      |          |          |
| 33 |                   |      |          |          |
| 34 |                   |      |          |          |
| 35 |                   |      |          |          |
| 36 |                   |      |          |          |
| 37 |                   |      |          |          |
| 38 |                   |      |          |          |
| 39 |                   |      |          |          |
| 40 |                   |      |          |          |
| 41 |                   |      |          |          |
| 42 |                   |      |          |          |
| 43 |                   |      |          |          |
| 44 |                   |      |          |          |
| 45 |                   |      |          |          |
| 46 |                   |      |          |          |

1  
2  
3  
4  
5  
6  
7  
8  
9  
10  
11  
12  
13  
14  
15  
16  
17  
18  
19  
20  
21  
22  
23  
24  
25  
26  
27  
28  
29  
30  
31  
32  
33  
34  
35  
36  
37  
38  
39  
40  
41  
42  
43  
44  
45  
46

|                     |      |          |          |
|---------------------|------|----------|----------|
| Republic of Korea   | 2001 | 1.084258 | 0.656648 |
| Republic of Korea   | 2002 | 1.098332 | 0.660852 |
| Republic of Korea   | 2003 | 1.097612 | 0.658917 |
| Republic of Korea   | 2004 | 1.07524  | 0.647505 |
| Republic of Korea   | 2005 | 1.071843 | 0.64214  |
| Republic of Korea   | 2006 | 1.053906 | 0.631558 |
| Republic of Korea   | 2007 | 1.044885 | 0.623151 |
| Republic of Korea   | 2008 | 1.029952 | 0.613718 |
| Republic of Korea   | 2009 | 1.024996 | 0.609758 |
| Republic of Korea   | 2010 | 1.018097 | 0.600666 |
| Republic of Korea   | 2011 | 1.014423 | 0.595254 |
| Republic of Korea   | 2012 | 1.014457 | 0.594651 |
| Republic of Korea   | 2013 | 1.016761 | 0.598625 |
| Republic of Korea   | 2014 | 1.009222 | 0.597557 |
| Republic of Korea   | 2015 | 1.013167 | 0.598706 |
| Republic of Korea   | 2016 | 1.015444 | 0.601958 |
| Republic of Korea   | 2017 | 1.00616  | 0.602647 |
| Republic of Korea   | 2018 | 1.025879 | 0.621714 |
| Republic of Korea   | 2019 | 1.022686 | 0.625971 |
| Republic of Moldova | 1990 | 0.848599 | 0.515396 |
| Republic of Moldova | 1991 | 0.818752 | 0.511245 |
| Republic of Moldova | 1992 | 0.812354 | 0.508411 |
| Republic of Moldova | 1993 | 0.824758 | 0.520016 |
| Republic of Moldova | 1994 | 0.758844 | 0.496269 |
| Republic of Moldova | 1995 | 0.723716 | 0.482553 |

|    |                     |      |          |          |
|----|---------------------|------|----------|----------|
| 1  |                     |      |          |          |
| 2  |                     |      |          |          |
| 3  |                     |      |          |          |
| 4  |                     |      |          |          |
| 5  | Republic of Moldova | 1996 | 0.715793 | 0.47752  |
| 6  | Republic of Moldova | 1997 | 0.74865  | 0.492646 |
| 7  | Republic of Moldova | 1998 | 0.729586 | 0.478633 |
| 8  | Republic of Moldova | 1999 | 0.75475  | 0.494013 |
| 9  | Republic of Moldova | 2000 | 0.786413 | 0.514092 |
| 10 | Republic of Moldova | 2001 | 0.805144 | 0.526969 |
| 11 | Republic of Moldova | 2002 | 0.881436 | 0.580425 |
| 12 | Republic of Moldova | 2003 | 0.920664 | 0.606418 |
| 13 | Republic of Moldova | 2004 | 0.883634 | 0.573869 |
| 14 | Republic of Moldova | 2005 | 0.825192 | 0.541935 |
| 15 | Republic of Moldova | 2006 | 0.878413 | 0.571388 |
| 16 | Republic of Moldova | 2007 | 0.941002 | 0.612718 |
| 17 | Republic of Moldova | 2008 | 0.957584 | 0.626718 |
| 18 | Republic of Moldova | 2009 | 0.965352 | 0.637306 |
| 19 | Republic of Moldova | 2010 | 0.955516 | 0.637033 |
| 20 | Republic of Moldova | 2011 | 0.986443 | 0.647917 |
| 21 | Republic of Moldova | 2012 | 1.008266 | 0.659343 |
| 22 | Republic of Moldova | 2013 | 1.062256 | 0.694627 |
| 23 | Republic of Moldova | 2014 | 1.059157 | 0.69576  |
| 24 | Republic of Moldova | 2015 | 1.00229  | 0.644196 |
| 25 | Republic of Moldova | 2016 | 1.059686 | 0.666742 |
| 26 | Republic of Moldova | 2017 | 1.114566 | 0.69188  |
| 27 | Republic of Moldova | 2018 | 1.082026 | 0.672992 |
| 28 | Republic of Moldova | 2019 | 1.044547 | 0.651103 |
| 29 | Romania             | 1990 | 1.079553 | 0.866268 |
| 30 |                     |      |          |          |
| 31 |                     |      |          |          |
| 32 |                     |      |          |          |
| 33 |                     |      |          |          |
| 34 |                     |      |          |          |
| 35 |                     |      |          |          |
| 36 |                     |      |          |          |
| 37 |                     |      |          |          |
| 38 |                     |      |          |          |
| 39 |                     |      |          |          |
| 40 |                     |      |          |          |
| 41 |                     |      |          |          |
| 42 |                     |      |          |          |
| 43 |                     |      |          |          |
| 44 |                     |      |          |          |
| 45 |                     |      |          |          |
| 46 |                     |      |          |          |

1  
2  
3  
4  
5  
6  
7  
8  
9  
10  
11  
12  
13  
14  
15  
16  
17  
18  
19  
20  
21  
22  
23  
24  
25  
26  
27  
28  
29  
30  
31  
32  
33  
34  
35  
36  
37  
38  
39  
40  
41  
42  
43  
44  
45  
46

|         |      |          |          |
|---------|------|----------|----------|
| Romania | 1991 | 1.086222 | 0.862351 |
| Romania | 1992 | 1.046153 | 0.826138 |
| Romania | 1993 | 1.029617 | 0.80953  |
| Romania | 1994 | 1.012606 | 0.792177 |
| Romania | 1995 | 1.000688 | 0.777709 |
| Romania | 1996 | 0.983609 | 0.758064 |
| Romania | 1997 | 0.959848 | 0.733464 |
| Romania | 1998 | 0.981335 | 0.736681 |
| Romania | 1999 | 0.997782 | 0.738726 |
| Romania | 2000 | 0.994107 | 0.73164  |
| Romania | 2001 | 0.956077 | 0.70287  |
| Romania | 2002 | 0.951443 | 0.694438 |
| Romania | 2003 | 0.945295 | 0.685769 |
| Romania | 2004 | 0.936806 | 0.672382 |
| Romania | 2005 | 0.962369 | 0.686111 |
| Romania | 2006 | 0.981261 | 0.695823 |
| Romania | 2007 | 1.005379 | 0.708652 |
| Romania | 2008 | 0.989066 | 0.694823 |
| Romania | 2009 | 0.998743 | 0.697203 |
| Romania | 2010 | 0.99074  | 0.686144 |
| Romania | 2011 | 1.001066 | 0.685511 |
| Romania | 2012 | 0.997056 | 0.677662 |
| Romania | 2013 | 1.01578  | 0.685032 |
| Romania | 2014 | 1.005041 | 0.674832 |
| Romania | 2015 | 1.007222 | 0.673017 |

|                    |      |          |          |
|--------------------|------|----------|----------|
| Romania            | 2016 | 1.00319  | 0.668504 |
| Romania            | 2017 | 1.008839 | 0.671674 |
| Romania            | 2018 | 1.002935 | 0.667179 |
| Romania            | 2019 | 1.007882 | 0.667713 |
| Russian Federation | 1990 | 1.237604 | 0.690445 |
| Russian Federation | 1991 | 1.240021 | 0.696266 |
| Russian Federation | 1992 | 1.175419 | 0.674369 |
| Russian Federation | 1993 | 1.095619 | 0.649003 |
| Russian Federation | 1994 | 1.066959 | 0.643526 |
| Russian Federation | 1995 | 1.088154 | 0.651418 |
| Russian Federation | 1996 | 1.13313  | 0.665031 |
| Russian Federation | 1997 | 1.192142 | 0.685413 |
| Russian Federation | 1998 | 1.203965 | 0.68899  |
| Russian Federation | 1999 | 1.163027 | 0.676473 |
| Russian Federation | 2000 | 1.12748  | 0.660553 |
| Russian Federation | 2001 | 1.143098 | 0.666437 |
| Russian Federation | 2002 | 1.151992 | 0.668583 |
| Russian Federation | 2003 | 1.154748 | 0.670397 |
| Russian Federation | 2004 | 1.162412 | 0.672801 |
| Russian Federation | 2005 | 1.157706 | 0.672401 |
| Russian Federation | 2006 | 1.19925  | 0.68176  |
| Russian Federation | 2007 | 1.232211 | 0.690174 |
| Russian Federation | 2008 | 1.223246 | 0.681691 |
| Russian Federation | 2009 | 1.255663 | 0.690114 |
| Russian Federation | 2010 | 1.250566 | 0.683559 |



|    |                    |      |          |          |
|----|--------------------|------|----------|----------|
| 1  |                    |      |          |          |
| 2  |                    |      |          |          |
| 3  |                    |      |          |          |
| 4  |                    |      |          |          |
| 5  | Russian Federation | 2011 | 1.286702 | 0.694845 |
| 6  | Russian Federation | 2012 | 1.295215 | 0.692835 |
| 7  | Russian Federation | 2013 | 1.305034 | 0.693218 |
| 8  | Russian Federation | 2014 | 1.302006 | 0.689733 |
| 9  | Russian Federation | 2015 | 1.334409 | 0.703311 |
| 10 | Russian Federation | 2016 | 1.344511 | 0.707135 |
| 11 | Russian Federation | 2017 | 1.394103 | 0.731382 |
| 12 | Russian Federation | 2018 | 1.394549 | 0.735282 |
| 13 | Russian Federation | 2019 | 1.381232 | 0.732034 |
| 14 | Russian Federation | 2019 | 1.381232 | 0.732034 |
| 15 | Russian Federation | 2019 | 1.381232 | 0.732034 |
| 16 | Russian Federation | 2019 | 1.381232 | 0.732034 |
| 17 | Rwanda             | 1990 | 0.824395 | 0.650032 |
| 18 | Rwanda             | 1991 | 0.81081  | 0.639775 |
| 19 | Rwanda             | 1992 | 0.782385 | 0.617991 |
| 20 | Rwanda             | 1993 | 0.760105 | 0.601291 |
| 21 | Rwanda             | 1994 | 0.756358 | 0.581929 |
| 22 | Rwanda             | 1995 | 0.759429 | 0.566516 |
| 23 | Rwanda             | 1996 | 0.759521 | 0.566825 |
| 24 | Rwanda             | 1997 | 0.765052 | 0.5693   |
| 25 | Rwanda             | 1998 | 0.787475 | 0.580555 |
| 26 | Rwanda             | 1999 | 0.816803 | 0.597427 |
| 27 | Rwanda             | 2000 | 0.829663 | 0.603649 |
| 28 | Rwanda             | 2001 | 0.843068 | 0.611413 |
| 29 | Rwanda             | 2002 | 0.852925 | 0.615855 |
| 30 | Rwanda             | 2003 | 0.865838 | 0.623707 |
| 31 | Rwanda             | 2004 | 0.873066 | 0.62669  |
| 32 | Rwanda             | 2005 | 0.876651 | 0.629256 |
| 33 |                    |      |          |          |
| 34 |                    |      |          |          |
| 35 |                    |      |          |          |
| 36 |                    |      |          |          |
| 37 |                    |      |          |          |
| 38 |                    |      |          |          |
| 39 |                    |      |          |          |
| 40 |                    |      |          |          |
| 41 |                    |      |          |          |
| 42 |                    |      |          |          |
| 43 |                    |      |          |          |
| 44 |                    |      |          |          |
| 45 |                    |      |          |          |
| 46 |                    |      |          |          |

|                       |      |          |          |
|-----------------------|------|----------|----------|
| Rwanda                | 2006 | 0.874617 | 0.628897 |
| Rwanda                | 2007 | 0.878535 | 0.630917 |
| Rwanda                | 2008 | 0.887536 | 0.635571 |
| Rwanda                | 2009 | 0.895936 | 0.641741 |
| Rwanda                | 2010 | 0.908779 | 0.649458 |
| Rwanda                | 2011 | 0.918745 | 0.656101 |
| Rwanda                | 2012 | 0.926945 | 0.661974 |
| Rwanda                | 2013 | 0.939974 | 0.672839 |
| Rwanda                | 2014 | 0.956287 | 0.683731 |
| Rwanda                | 2015 | 0.969773 | 0.693098 |
| Rwanda                | 2016 | 0.978654 | 0.701247 |
| Rwanda                | 2017 | 0.990168 | 0.711922 |
| Rwanda                | 2018 | 0.998336 | 0.721102 |
| Rwanda                | 2019 | 1.006308 | 0.729699 |
| Saint Kitts and Nevis | 1990 | 0.977618 | 0.720692 |
| Saint Kitts and Nevis | 1991 | 0.777526 | 0.583399 |
| Saint Kitts and Nevis | 1992 | 0.785881 | 0.582392 |
| Saint Kitts and Nevis | 1993 | 0.805116 | 0.592521 |
| Saint Kitts and Nevis | 1994 | 0.839028 | 0.608603 |
| Saint Kitts and Nevis | 1995 | 0.876303 | 0.63063  |
| Saint Kitts and Nevis | 1996 | 0.864655 | 0.621258 |
| Saint Kitts and Nevis | 1997 | 0.863032 | 0.618292 |
| Saint Kitts and Nevis | 1998 | 0.870163 | 0.623277 |
| Saint Kitts and Nevis | 1999 | 0.883872 | 0.634954 |
| Saint Kitts and Nevis | 2000 | 0.915314 | 0.659458 |

|    |                       |      |          |          |
|----|-----------------------|------|----------|----------|
| 1  |                       |      |          |          |
| 2  |                       |      |          |          |
| 3  |                       |      |          |          |
| 4  |                       |      |          |          |
| 5  | Saint Kitts and Nevis | 2001 | 0.928859 | 0.671865 |
| 6  | Saint Kitts and Nevis | 2002 | 0.937404 | 0.681404 |
| 7  | Saint Kitts and Nevis | 2003 | 0.933207 | 0.684634 |
| 8  | Saint Kitts and Nevis | 2004 | 0.939514 | 0.703626 |
| 9  | Saint Kitts and Nevis | 2005 | 0.924993 | 0.701387 |
| 10 | Saint Kitts and Nevis | 2006 | 0.919201 | 0.70406  |
| 11 | Saint Kitts and Nevis | 2007 | 0.915181 | 0.707981 |
| 12 | Saint Kitts and Nevis | 2008 | 0.952305 | 0.723867 |
| 13 | Saint Kitts and Nevis | 2009 | 0.968373 | 0.732117 |
| 14 | Saint Kitts and Nevis | 2010 | 0.954543 | 0.723024 |
| 15 | Saint Kitts and Nevis | 2011 | 0.948111 | 0.715818 |
| 16 | Saint Kitts and Nevis | 2012 | 0.924673 | 0.698322 |
| 17 | Saint Kitts and Nevis | 2013 | 0.918237 | 0.695838 |
| 18 | Saint Kitts and Nevis | 2014 | 0.906135 | 0.692654 |
| 19 | Saint Kitts and Nevis | 2015 | 0.881642 | 0.680331 |
| 20 | Saint Kitts and Nevis | 2016 | 0.867707 | 0.674668 |
| 21 | Saint Kitts and Nevis | 2017 | 0.850948 | 0.666632 |
| 22 | Saint Kitts and Nevis | 2018 | 0.831812 | 0.66427  |
| 23 | Saint Kitts and Nevis | 2019 | 0.750426 | 0.666059 |
| 24 | Saint Lucia           | 1990 | 0.820367 | 0.585517 |
| 25 | Saint Lucia           | 1991 | 0.834488 | 0.602001 |
| 26 | Saint Lucia           | 1992 | 0.850757 | 0.616906 |
| 27 | Saint Lucia           | 1993 | 0.849089 | 0.617068 |
| 28 | Saint Lucia           | 1994 | 0.839079 | 0.615244 |
| 29 | Saint Lucia           | 1995 | 0.835752 | 0.620428 |
| 30 |                       |      |          |          |
| 31 |                       |      |          |          |
| 32 |                       |      |          |          |
| 33 |                       |      |          |          |
| 34 |                       |      |          |          |
| 35 |                       |      |          |          |
| 36 |                       |      |          |          |
| 37 |                       |      |          |          |
| 38 |                       |      |          |          |
| 39 |                       |      |          |          |
| 40 |                       |      |          |          |
| 41 |                       |      |          |          |
| 42 |                       |      |          |          |
| 43 |                       |      |          |          |
| 44 |                       |      |          |          |
| 45 |                       |      |          |          |
| 46 |                       |      |          |          |

|    |                                  |      |          |          |
|----|----------------------------------|------|----------|----------|
| 1  |                                  |      |          |          |
| 2  |                                  |      |          |          |
| 3  |                                  |      |          |          |
| 4  |                                  |      |          |          |
| 5  | Saint Lucia                      | 1996 | 0.802615 | 0.604438 |
| 6  | Saint Lucia                      | 1997 | 0.774274 | 0.589376 |
| 7  | Saint Lucia                      | 1998 | 0.782389 | 0.602523 |
| 8  | Saint Lucia                      | 1999 | 0.790826 | 0.617421 |
| 9  | Saint Lucia                      | 2000 | 0.790218 | 0.620439 |
| 10 | Saint Lucia                      | 2001 | 0.777224 | 0.604588 |
| 11 | Saint Lucia                      | 2002 | 0.758923 | 0.587237 |
| 12 | Saint Lucia                      | 2003 | 0.760145 | 0.586709 |
| 13 | Saint Lucia                      | 2004 | 0.775105 | 0.596586 |
| 14 | Saint Lucia                      | 2005 | 0.798511 | 0.615856 |
| 15 | Saint Lucia                      | 2006 | 0.810371 | 0.630761 |
| 16 | Saint Lucia                      | 2007 | 0.751768 | 0.58511  |
| 17 | Saint Lucia                      | 2008 | 0.741994 | 0.577525 |
| 18 | Saint Lucia                      | 2009 | 0.750507 | 0.586573 |
| 19 | Saint Lucia                      | 2010 | 0.760554 | 0.601201 |
| 20 | Saint Lucia                      | 2011 | 0.809689 | 0.64893  |
| 21 | Saint Lucia                      | 2012 | 0.822286 | 0.664903 |
| 22 | Saint Lucia                      | 2013 | 0.799342 | 0.645977 |
| 23 | Saint Lucia                      | 2014 | 0.801771 | 0.650044 |
| 24 | Saint Lucia                      | 2015 | 0.793431 | 0.646977 |
| 25 | Saint Lucia                      | 2016 | 0.788999 | 0.642229 |
| 26 | Saint Lucia                      | 2017 | 0.784017 | 0.638882 |
| 27 | Saint Lucia                      | 2018 | 0.780336 | 0.636198 |
| 28 | Saint Lucia                      | 2019 | 0.778887 | 0.635259 |
| 29 | Saint Vincent and the Grenadines | 1990 | 1.055811 | 0.779191 |
| 30 |                                  |      |          |          |
| 31 |                                  |      |          |          |
| 32 |                                  |      |          |          |
| 33 |                                  |      |          |          |
| 34 |                                  |      |          |          |
| 35 |                                  |      |          |          |
| 36 |                                  |      |          |          |
| 37 |                                  |      |          |          |
| 38 |                                  |      |          |          |
| 39 |                                  |      |          |          |
| 40 |                                  |      |          |          |
| 41 |                                  |      |          |          |
| 42 |                                  |      |          |          |
| 43 |                                  |      |          |          |
| 44 |                                  |      |          |          |
| 45 |                                  |      |          |          |
| 46 |                                  |      |          |          |

|    |                                  |      |          |          |
|----|----------------------------------|------|----------|----------|
| 1  |                                  |      |          |          |
| 2  |                                  |      |          |          |
| 3  |                                  |      |          |          |
| 4  |                                  |      |          |          |
| 5  | Saint Vincent and the Grenadines | 1991 | 1.060365 | 0.797731 |
| 6  | Saint Vincent and the Grenadines | 1992 | 1.059923 | 0.810912 |
| 7  | Saint Vincent and the Grenadines | 1993 | 1.059589 | 0.821744 |
| 8  | Saint Vincent and the Grenadines | 1994 | 1.069537 | 0.844344 |
| 9  | Saint Vincent and the Grenadines | 1995 | 0.990095 | 0.786788 |
| 10 | Saint Vincent and the Grenadines | 1996 | 0.92571  | 0.739108 |
| 11 | Saint Vincent and the Grenadines | 1997 | 0.894478 | 0.717007 |
| 12 | Saint Vincent and the Grenadines | 1998 | 0.881609 | 0.708572 |
| 13 | Saint Vincent and the Grenadines | 1999 | 0.895191 | 0.717596 |
| 14 | Saint Vincent and the Grenadines | 2000 | 0.906901 | 0.727819 |
| 15 | Saint Vincent and the Grenadines | 2001 | 0.941204 | 0.766283 |
| 16 | Saint Vincent and the Grenadines | 2002 | 0.931621 | 0.760813 |
| 17 | Saint Vincent and the Grenadines | 2003 | 0.921101 | 0.754886 |
| 18 | Saint Vincent and the Grenadines | 2004 | 0.923713 | 0.758606 |
| 19 | Saint Vincent and the Grenadines | 2005 | 0.929897 | 0.771784 |
| 20 | Saint Vincent and the Grenadines | 2006 | 0.913858 | 0.763832 |
| 21 | Saint Vincent and the Grenadines | 2007 | 0.919976 | 0.775243 |
| 22 | Saint Vincent and the Grenadines | 2008 | 0.938457 | 0.802308 |
| 23 | Saint Vincent and the Grenadines | 2009 | 0.962495 | 0.834135 |
| 24 | Saint Vincent and the Grenadines | 2010 | 0.971071 | 0.849322 |
| 25 | Saint Vincent and the Grenadines | 2011 | 0.979049 | 0.865898 |
| 26 | Saint Vincent and the Grenadines | 2012 | 0.956986 | 0.863578 |
| 27 | Saint Vincent and the Grenadines | 2013 | 0.933168 | 0.860723 |
| 28 | Saint Vincent and the Grenadines | 2014 | 0.921409 | 0.863582 |
| 29 | Saint Vincent and the Grenadines | 2015 | 0.907507 | 0.86158  |
| 30 |                                  |      |          |          |
| 31 |                                  |      |          |          |
| 32 |                                  |      |          |          |
| 33 |                                  |      |          |          |
| 34 |                                  |      |          |          |
| 35 |                                  |      |          |          |
| 36 |                                  |      |          |          |
| 37 |                                  |      |          |          |
| 38 |                                  |      |          |          |
| 39 |                                  |      |          |          |
| 40 |                                  |      |          |          |
| 41 |                                  |      |          |          |
| 42 |                                  |      |          |          |
| 43 |                                  |      |          |          |
| 44 |                                  |      |          |          |
| 45 |                                  |      |          |          |
| 46 |                                  |      |          |          |

|    |                                  |      |          |          |
|----|----------------------------------|------|----------|----------|
| 1  |                                  |      |          |          |
| 2  |                                  |      |          |          |
| 3  |                                  |      |          |          |
| 4  |                                  |      |          |          |
| 5  | Saint Vincent and the Grenadines | 2016 | 0.873985 | 0.842537 |
| 6  | Saint Vincent and the Grenadines | 2017 | 0.859361 | 0.837012 |
| 7  | Saint Vincent and the Grenadines | 2018 | 0.845672 | 0.830576 |
| 8  | Saint Vincent and the Grenadines | 2019 | 0.833823 | 0.82454  |
| 9  |                                  |      |          |          |
| 10 | Samoa                            | 1990 | 0.980132 | 0.843734 |
| 11 | Samoa                            | 1991 | 1.000796 | 0.860756 |
| 12 | Samoa                            | 1992 | 1.023771 | 0.880098 |
| 13 | Samoa                            | 1993 | 1.031447 | 0.887633 |
| 14 | Samoa                            | 1994 | 1.049276 | 0.904544 |
| 15 | Samoa                            | 1995 | 1.068083 | 0.922056 |
| 16 | Samoa                            | 1996 | 1.09226  | 0.944345 |
| 17 | Samoa                            | 1997 | 1.116858 | 0.967899 |
| 18 | Samoa                            | 1998 | 1.143322 | 0.993029 |
| 19 | Samoa                            | 1999 | 1.164018 | 1.012467 |
| 20 | Samoa                            | 2000 | 1.177392 | 1.024988 |
| 21 | Samoa                            | 2001 | 1.172274 | 1.021756 |
| 22 | Samoa                            | 2002 | 1.173842 | 1.024537 |
| 23 | Samoa                            | 2003 | 1.149307 | 1.003549 |
| 24 | Samoa                            | 2004 | 1.138468 | 0.993735 |
| 25 | Samoa                            | 2005 | 1.108915 | 0.967133 |
| 26 | Samoa                            | 2006 | 1.073711 | 0.93589  |
| 27 | Samoa                            | 2007 | 1.042902 | 0.907576 |
| 28 | Samoa                            | 2008 | 1.016908 | 0.884179 |
| 29 | Samoa                            | 2009 | 0.997005 | 0.866721 |
| 30 | Samoa                            | 2010 | 0.976604 | 0.849334 |
| 31 |                                  |      |          |          |
| 32 |                                  |      |          |          |
| 33 |                                  |      |          |          |
| 34 |                                  |      |          |          |
| 35 |                                  |      |          |          |
| 36 |                                  |      |          |          |
| 37 |                                  |      |          |          |
| 38 |                                  |      |          |          |
| 39 |                                  |      |          |          |
| 40 |                                  |      |          |          |
| 41 |                                  |      |          |          |
| 42 |                                  |      |          |          |
| 43 |                                  |      |          |          |
| 44 |                                  |      |          |          |
| 45 |                                  |      |          |          |
| 46 |                                  |      |          |          |

1  
2  
3  
4  
5  
6  
7  
8  
9  
10  
11  
12  
13  
14  
15  
16  
17  
18  
19  
20  
21  
22  
23  
24  
25  
26  
27  
28  
29  
30  
31  
32  
33  
34  
35  
36  
37  
38  
39  
40  
41  
42  
43  
44  
45  
46

|            |      |          |          |
|------------|------|----------|----------|
| Samoa      | 2011 | 0.979265 | 0.852803 |
| Samoa      | 2012 | 0.968264 | 0.845265 |
| Samoa      | 2013 | 0.953319 | 0.834396 |
| Samoa      | 2014 | 0.945781 | 0.83022  |
| Samoa      | 2015 | 0.951454 | 0.837853 |
| Samoa      | 2016 | 0.955475 | 0.844459 |
| Samoa      | 2017 | 0.95904  | 0.851083 |
| Samoa      | 2018 | 0.959346 | 0.855019 |
| Samoa      | 2019 | 0.959927 | 0.859111 |
| San Marino | 1990 | 1.040527 | 0.662137 |
| San Marino | 1991 | 1.034054 | 0.656258 |
| San Marino | 1992 | 1.028794 | 0.650989 |
| San Marino | 1993 | 1.017848 | 0.641779 |
| San Marino | 1994 | 1.014914 | 0.637147 |
| San Marino | 1995 | 1.022855 | 0.638643 |
| San Marino | 1996 | 1.013723 | 0.629773 |
| San Marino | 1997 | 1.0178   | 0.629635 |
| San Marino | 1998 | 1.035194 | 0.637541 |
| San Marino | 1999 | 1.043112 | 0.639273 |
| San Marino | 2000 | 1.061203 | 0.647772 |
| San Marino | 2001 | 1.10068  | 0.670472 |
| San Marino | 2002 | 1.14621  | 0.698311 |
| San Marino | 2003 | 1.202461 | 0.735765 |
| San Marino | 2004 | 1.23389  | 0.760178 |
| San Marino | 2005 | 1.268334 | 0.786763 |

|                       |      |          |          |
|-----------------------|------|----------|----------|
| San Marino            | 2006 | 1.273335 | 0.794871 |
| San Marino            | 2007 | 1.275614 | 0.800868 |
| San Marino            | 2008 | 1.277743 | 0.806368 |
| San Marino            | 2009 | 1.28295  | 0.813942 |
| San Marino            | 2010 | 1.285141 | 0.819464 |
| San Marino            | 2011 | 1.287608 | 0.82488  |
| San Marino            | 2012 | 1.291652 | 0.831402 |
| San Marino            | 2013 | 1.289952 | 0.834102 |
| San Marino            | 2014 | 1.286467 | 0.835325 |
| San Marino            | 2015 | 1.283363 | 0.83659  |
| San Marino            | 2016 | 1.277029 | 0.835106 |
| San Marino            | 2017 | 1.264401 | 0.829351 |
| San Marino            | 2018 | 1.251972 | 0.823236 |
| San Marino            | 2019 | 1.24039  | 0.817325 |
| Sao Tome and Principe | 1990 | 1.091374 | 0.933524 |
| Sao Tome and Principe | 1991 | 1.113804 | 0.953047 |
| Sao Tome and Principe | 1992 | 1.139972 | 0.980625 |
| Sao Tome and Principe | 1993 | 1.215059 | 1.081878 |
| Sao Tome and Principe | 1994 | 1.239155 | 1.109895 |
| Sao Tome and Principe | 1995 | 1.238259 | 1.114617 |
| Sao Tome and Principe | 1996 | 1.244594 | 1.125181 |
| Sao Tome and Principe | 1997 | 1.254845 | 1.138117 |
| Sao Tome and Principe | 1998 | 1.258592 | 1.1408   |
| Sao Tome and Principe | 1999 | 1.273254 | 1.152136 |
| Sao Tome and Principe | 2000 | 1.308013 | 1.172362 |



|    |                       |      |          |          |
|----|-----------------------|------|----------|----------|
| 1  |                       |      |          |          |
| 2  |                       |      |          |          |
| 3  |                       |      |          |          |
| 4  |                       |      |          |          |
| 5  | Sao Tome and Principe | 2001 | 1.29916  | 1.159733 |
| 6  | Sao Tome and Principe | 2002 | 1.282631 | 1.149629 |
| 7  | Sao Tome and Principe | 2003 | 1.269253 | 1.131711 |
| 8  | Sao Tome and Principe | 2004 | 1.255308 | 1.12558  |
| 9  | Sao Tome and Principe | 2005 | 1.212922 | 1.088347 |
| 10 | Sao Tome and Principe | 2006 | 1.221649 | 1.093759 |
| 11 | Sao Tome and Principe | 2007 | 1.246116 | 1.111153 |
| 12 | Sao Tome and Principe | 2008 | 1.226771 | 1.095035 |
| 13 | Sao Tome and Principe | 2009 | 1.23417  | 1.099047 |
| 14 | Sao Tome and Principe | 2010 | 1.258555 | 1.117148 |
| 15 | Sao Tome and Principe | 2011 | 1.232555 | 1.096997 |
| 16 | Sao Tome and Principe | 2012 | 1.205056 | 1.075871 |
| 17 | Sao Tome and Principe | 2013 | 1.198096 | 1.069787 |
| 18 | Sao Tome and Principe | 2014 | 1.213287 | 1.080153 |
| 19 | Sao Tome and Principe | 2015 | 1.213986 | 1.080881 |
| 20 | Sao Tome and Principe | 2016 | 1.216079 | 1.082527 |
| 21 | Sao Tome and Principe | 2017 | 1.219651 | 1.086355 |
| 22 | Sao Tome and Principe | 2018 | 1.220924 | 1.08889  |
| 23 | Sao Tome and Principe | 2019 | 1.219127 | 1.08909  |
| 24 | Saudi Arabia          | 1990 | 0.695398 | 0.829786 |
| 25 | Saudi Arabia          | 1991 | 0.712169 | 0.854348 |
| 26 | Saudi Arabia          | 1992 | 0.719496 | 0.867184 |
| 27 | Saudi Arabia          | 1993 | 0.727002 | 0.878748 |
| 28 | Saudi Arabia          | 1994 | 0.742709 | 0.898777 |
| 29 | Saudi Arabia          | 1995 | 0.761874 | 0.922789 |
| 30 |                       |      |          |          |
| 31 |                       |      |          |          |
| 32 |                       |      |          |          |
| 33 |                       |      |          |          |
| 34 |                       |      |          |          |
| 35 |                       |      |          |          |
| 36 |                       |      |          |          |
| 37 |                       |      |          |          |
| 38 |                       |      |          |          |
| 39 |                       |      |          |          |
| 40 |                       |      |          |          |
| 41 |                       |      |          |          |
| 42 |                       |      |          |          |
| 43 |                       |      |          |          |
| 44 |                       |      |          |          |
| 45 |                       |      |          |          |
| 46 |                       |      |          |          |

|    |              |      |          |          |
|----|--------------|------|----------|----------|
| 1  |              |      |          |          |
| 2  |              |      |          |          |
| 3  |              |      |          |          |
| 4  |              |      |          |          |
| 5  | Saudi Arabia | 1996 | 0.784305 | 0.947356 |
| 6  | Saudi Arabia | 1997 | 0.804263 | 0.967726 |
| 7  | Saudi Arabia | 1998 | 0.810679 | 0.973063 |
| 8  | Saudi Arabia | 1999 | 0.816395 | 0.976741 |
| 9  | Saudi Arabia | 2000 | 0.820477 | 0.983554 |
| 10 | Saudi Arabia | 2001 | 0.821211 | 0.976888 |
| 11 | Saudi Arabia | 2002 | 0.827178 | 0.977433 |
| 12 | Saudi Arabia | 2003 | 0.822493 | 0.962185 |
| 13 | Saudi Arabia | 2004 | 0.821679 | 0.95553  |
| 14 | Saudi Arabia | 2005 | 0.815244 | 0.948694 |
| 15 | Saudi Arabia | 2006 | 0.810154 | 0.94029  |
| 16 | Saudi Arabia | 2007 | 0.800765 | 0.931723 |
| 17 | Saudi Arabia | 2008 | 0.786844 | 0.922069 |
| 18 | Saudi Arabia | 2009 | 0.772323 | 0.91303  |
| 19 | Saudi Arabia | 2010 | 0.76119  | 0.911913 |
| 20 | Saudi Arabia | 2011 | 0.745556 | 0.899816 |
| 21 | Saudi Arabia | 2012 | 0.73911  | 0.89891  |
| 22 | Saudi Arabia | 2013 | 0.736146 | 0.907402 |
| 23 | Saudi Arabia | 2014 | 0.739157 | 0.923105 |
| 24 | Saudi Arabia | 2015 | 0.740954 | 0.940363 |
| 25 | Saudi Arabia | 2016 | 0.745207 | 0.95483  |
| 26 | Saudi Arabia | 2017 | 0.752481 | 0.975445 |
| 27 | Saudi Arabia | 2018 | 0.758989 | 0.995576 |
| 28 | Saudi Arabia | 2019 | 0.763422 | 1.013679 |
| 29 | Senegal      | 1990 | 0.884747 | 0.858724 |
| 30 |              |      |          |          |
| 31 |              |      |          |          |
| 32 |              |      |          |          |
| 33 |              |      |          |          |
| 34 |              |      |          |          |
| 35 |              |      |          |          |
| 36 |              |      |          |          |
| 37 |              |      |          |          |
| 38 |              |      |          |          |
| 39 |              |      |          |          |
| 40 |              |      |          |          |
| 41 |              |      |          |          |
| 42 |              |      |          |          |
| 43 |              |      |          |          |
| 44 |              |      |          |          |
| 45 |              |      |          |          |
| 46 |              |      |          |          |

|         |      |          |          |
|---------|------|----------|----------|
| Senegal | 1991 | 0.891844 | 0.862058 |
| Senegal | 1992 | 0.896679 | 0.863392 |
| Senegal | 1993 | 0.898105 | 0.862398 |
| Senegal | 1994 | 0.899111 | 0.862183 |
| Senegal | 1995 | 0.899343 | 0.859763 |
| Senegal | 1996 | 0.898532 | 0.857803 |
| Senegal | 1997 | 0.886586 | 0.844268 |
| Senegal | 1998 | 0.88376  | 0.840365 |
| Senegal | 1999 | 0.881527 | 0.836596 |
| Senegal | 2000 | 0.879275 | 0.831594 |
| Senegal | 2001 | 0.872506 | 0.825969 |
| Senegal | 2002 | 0.870204 | 0.822799 |
| Senegal | 2003 | 0.873973 | 0.821234 |
| Senegal | 2004 | 0.850079 | 0.798413 |
| Senegal | 2005 | 0.827835 | 0.77646  |
| Senegal | 2006 | 0.808141 | 0.756535 |
| Senegal | 2007 | 0.794045 | 0.741842 |
| Senegal | 2008 | 0.77887  | 0.72756  |
| Senegal | 2009 | 0.767907 | 0.716548 |
| Senegal | 2010 | 0.767865 | 0.711673 |
| Senegal | 2011 | 0.767131 | 0.709302 |
| Senegal | 2012 | 0.765409 | 0.707099 |
| Senegal | 2013 | 0.761534 | 0.704161 |
| Senegal | 2014 | 0.764675 | 0.707866 |
| Senegal | 2015 | 0.770795 | 0.712137 |

|    |         |      |          |          |
|----|---------|------|----------|----------|
| 1  |         |      |          |          |
| 2  |         |      |          |          |
| 3  |         |      |          |          |
| 4  |         |      |          |          |
| 5  | Senegal | 2016 | 0.779506 | 0.720298 |
| 6  | Senegal | 2017 | 0.787654 | 0.727948 |
| 7  | Senegal | 2018 | 0.79524  | 0.735888 |
| 8  | Senegal | 2019 | 0.802915 | 0.743064 |
| 9  |         |      |          |          |
| 10 | Serbia  | 1990 | 0.73799  | 0.603061 |
| 11 | Serbia  | 1991 | 0.751915 | 0.61215  |
| 12 | Serbia  | 1992 | 0.745895 | 0.598418 |
| 13 | Serbia  | 1993 | 0.766901 | 0.611856 |
| 14 | Serbia  | 1994 | 0.781888 | 0.620647 |
| 15 | Serbia  | 1995 | 0.792746 | 0.626364 |
| 16 | Serbia  | 1996 | 0.802507 | 0.635855 |
| 17 | Serbia  | 1997 | 0.815138 | 0.652642 |
| 18 | Serbia  | 1998 | 0.778837 | 0.621888 |
| 19 | Serbia  | 1999 | 0.794648 | 0.623776 |
| 20 | Serbia  | 2000 | 0.769534 | 0.605957 |
| 21 | Serbia  | 2001 | 0.77247  | 0.605364 |
| 22 | Serbia  | 2002 | 0.734907 | 0.574323 |
| 23 | Serbia  | 2003 | 0.746359 | 0.581392 |
| 24 | Serbia  | 2004 | 0.746084 | 0.578442 |
| 25 | Serbia  | 2005 | 0.760475 | 0.588941 |
| 26 | Serbia  | 2006 | 0.76393  | 0.589334 |
| 27 | Serbia  | 2007 | 0.77937  | 0.595466 |
| 28 | Serbia  | 2008 | 0.801348 | 0.61088  |
| 29 | Serbia  | 2009 | 0.83196  | 0.636222 |
| 30 | Serbia  | 2010 | 0.852949 | 0.653777 |
| 31 |         |      |          |          |
| 32 |         |      |          |          |
| 33 |         |      |          |          |
| 34 |         |      |          |          |
| 35 |         |      |          |          |
| 36 |         |      |          |          |
| 37 |         |      |          |          |
| 38 |         |      |          |          |
| 39 |         |      |          |          |
| 40 |         |      |          |          |
| 41 |         |      |          |          |
| 42 |         |      |          |          |
| 43 |         |      |          |          |
| 44 |         |      |          |          |
| 45 |         |      |          |          |
| 46 |         |      |          |          |

|            |      |          |          |
|------------|------|----------|----------|
| Serbia     | 2011 | 0.863156 | 0.660403 |
| Serbia     | 2012 | 0.88227  | 0.670731 |
| Serbia     | 2013 | 0.853039 | 0.639376 |
| Serbia     | 2014 | 0.87394  | 0.650601 |
| Serbia     | 2015 | 0.899328 | 0.670437 |
| Serbia     | 2016 | 0.926887 | 0.690613 |
| Serbia     | 2017 | 0.925711 | 0.690169 |
| Serbia     | 2018 | 0.933605 | 0.693648 |
| Serbia     | 2019 | 0.933707 | 0.696426 |
| Seychelles | 1990 | 1.017107 | 0.702428 |
| Seychelles | 1991 | 1.020898 | 0.697742 |
| Seychelles | 1992 | 1.022397 | 0.693457 |
| Seychelles | 1993 | 1.02782  | 0.692034 |
| Seychelles | 1994 | 1.017442 | 0.68456  |
| Seychelles | 1995 | 1.016606 | 0.679526 |
| Seychelles | 1996 | 1.045304 | 0.695115 |
| Seychelles | 1997 | 1.092161 | 0.725276 |
| Seychelles | 1998 | 1.128929 | 0.75104  |
| Seychelles | 1999 | 1.142566 | 0.765246 |
| Seychelles | 2000 | 1.186127 | 0.802943 |
| Seychelles | 2001 | 1.202158 | 0.822396 |
| Seychelles | 2002 | 1.188011 | 0.82041  |
| Seychelles | 2003 | 1.171268 | 0.813173 |
| Seychelles | 2004 | 1.209464 | 0.842131 |
| Seychelles | 2005 | 1.169282 | 0.805472 |

|              |      |          |          |
|--------------|------|----------|----------|
| Seychelles   | 2006 | 1.185979 | 0.818787 |
| Seychelles   | 2007 | 1.214313 | 0.845111 |
| Seychelles   | 2008 | 1.2311   | 0.859386 |
| Seychelles   | 2009 | 1.197098 | 0.834808 |
| Seychelles   | 2010 | 1.212228 | 0.867157 |
| Seychelles   | 2011 | 1.228304 | 0.902733 |
| Seychelles   | 2012 | 1.192854 | 0.880645 |
| Seychelles   | 2013 | 1.216633 | 0.907188 |
| Seychelles   | 2014 | 1.212517 | 0.925165 |
| Seychelles   | 2015 | 1.169363 | 0.915602 |
| Seychelles   | 2016 | 1.134994 | 0.909444 |
| Seychelles   | 2017 | 1.109851 | 0.89732  |
| Seychelles   | 2018 | 1.097048 | 0.897572 |
| Seychelles   | 2019 | 1.082504 | 0.898742 |
| Sierra Leone | 1990 | 0.787919 | 0.795377 |
| Sierra Leone | 1991 | 0.790962 | 0.792612 |
| Sierra Leone | 1992 | 0.792598 | 0.791321 |
| Sierra Leone | 1993 | 0.792881 | 0.789444 |
| Sierra Leone | 1994 | 0.810527 | 0.795239 |
| Sierra Leone | 1995 | 0.815354 | 0.795979 |
| Sierra Leone | 1996 | 0.830066 | 0.804332 |
| Sierra Leone | 1997 | 0.84446  | 0.812131 |
| Sierra Leone | 1998 | 0.851017 | 0.812806 |
| Sierra Leone | 1999 | 0.863143 | 0.810965 |
| Sierra Leone | 2000 | 0.867725 | 0.81152  |

1  
2  
3  
4  
5  
6  
7  
8  
9  
10  
11  
12  
13  
14  
15  
16  
17  
18  
19  
20  
21  
22  
23  
24  
25  
26  
27  
28  
29  
30  
31  
32  
33  
34  
35  
36  
37  
38  
39  
40  
41  
42  
43  
44  
45  
46

|              |      |          |          |
|--------------|------|----------|----------|
| Sierra Leone | 2001 | 0.870057 | 0.807892 |
| Sierra Leone | 2002 | 0.88269  | 0.814524 |
| Sierra Leone | 2003 | 0.887295 | 0.814107 |
| Sierra Leone | 2004 | 0.904772 | 0.819484 |
| Sierra Leone | 2005 | 0.902009 | 0.816075 |
| Sierra Leone | 2006 | 0.904874 | 0.816248 |
| Sierra Leone | 2007 | 0.908455 | 0.817708 |
| Sierra Leone | 2008 | 0.9111   | 0.81823  |
| Sierra Leone | 2009 | 0.916357 | 0.819564 |
| Sierra Leone | 2010 | 0.905713 | 0.815749 |
| Sierra Leone | 2011 | 0.90687  | 0.815569 |
| Sierra Leone | 2012 | 0.900591 | 0.815611 |
| Sierra Leone | 2013 | 0.898045 | 0.816791 |
| Sierra Leone | 2014 | 0.901668 | 0.824467 |
| Sierra Leone | 2015 | 0.894141 | 0.823506 |
| Sierra Leone | 2016 | 0.895925 | 0.830446 |
| Sierra Leone | 2017 | 0.895543 | 0.833929 |
| Sierra Leone | 2018 | 0.89368  | 0.835265 |
| Sierra Leone | 2019 | 0.891018 | 0.836793 |
| Singapore    | 1990 | 1.163438 | 0.899451 |
| Singapore    | 1991 | 1.129393 | 0.881363 |
| Singapore    | 1992 | 1.153563 | 0.921822 |
| Singapore    | 1993 | 1.116385 | 0.896281 |
| Singapore    | 1994 | 1.076889 | 0.845189 |
| Singapore    | 1995 | 1.050864 | 0.825318 |

|           |      |          |          |
|-----------|------|----------|----------|
| Singapore | 1996 | 1.071672 | 0.841391 |
| Singapore | 1997 | 1.106303 | 0.867415 |
| Singapore | 1998 | 1.083205 | 0.853333 |
| Singapore | 1999 | 1.096735 | 0.864456 |
| Singapore | 2000 | 1.107024 | 0.8751   |
| Singapore | 2001 | 1.12114  | 0.885171 |
| Singapore | 2002 | 1.135497 | 0.893845 |
| Singapore | 2003 | 1.181337 | 0.921314 |
| Singapore | 2004 | 1.240904 | 0.956691 |
| Singapore | 2005 | 1.124899 | 0.861722 |
| Singapore | 2006 | 1.140442 | 0.868721 |
| Singapore | 2007 | 1.129855 | 0.864193 |
| Singapore | 2008 | 1.16467  | 0.901644 |
| Singapore | 2009 | 1.191044 | 0.920265 |
| Singapore | 2010 | 1.184357 | 0.90915  |
| Singapore | 2011 | 1.179199 | 0.910006 |
| Singapore | 2012 | 1.200217 | 0.933094 |
| Singapore | 2013 | 1.208179 | 0.949316 |
| Singapore | 2014 | 1.211514 | 0.953871 |
| Singapore | 2015 | 1.211928 | 0.960929 |
| Singapore | 2016 | 1.199671 | 0.951955 |
| Singapore | 2017 | 1.233326 | 0.968313 |
| Singapore | 2018 | 1.219639 | 0.959599 |
| Singapore | 2019 | 1.250283 | 0.991418 |
| Slovakia  | 1990 | 0.944649 | 0.647308 |



1  
2  
3  
4  
5  
6  
7  
8  
9  
10  
11  
12  
13  
14  
15  
16  
17  
18  
19  
20  
21  
22  
23  
24  
25  
26  
27  
28  
29  
30  
31  
32  
33  
34  
35  
36  
37  
38  
39  
40  
41  
42  
43  
44  
45  
46

|          |      |          |          |
|----------|------|----------|----------|
| Slovakia | 1991 | 0.976455 | 0.663918 |
| Slovakia | 1992 | 0.955654 | 0.644376 |
| Slovakia | 1993 | 0.995726 | 0.665691 |
| Slovakia | 1994 | 1.009351 | 0.670677 |
| Slovakia | 1995 | 1.017436 | 0.674329 |
| Slovakia | 1996 | 1.009444 | 0.668133 |
| Slovakia | 1997 | 1.04119  | 0.687493 |
| Slovakia | 1998 | 0.992929 | 0.652283 |
| Slovakia | 1999 | 1.009819 | 0.657257 |
| Slovakia | 2000 | 0.975233 | 0.628247 |
| Slovakia | 2001 | 1.011914 | 0.645803 |
| Slovakia | 2002 | 0.985897 | 0.625087 |
| Slovakia | 2003 | 1.008043 | 0.633926 |
| Slovakia | 2004 | 1.051345 | 0.654676 |
| Slovakia | 2005 | 1.036508 | 0.64108  |
| Slovakia | 2006 | 1.062665 | 0.651686 |
| Slovakia | 2007 | 1.109865 | 0.678383 |
| Slovakia | 2008 | 1.093175 | 0.663884 |
| Slovakia | 2009 | 1.159077 | 0.696465 |
| Slovakia | 2010 | 1.148256 | 0.682306 |
| Slovakia | 2011 | 1.191118 | 0.703254 |
| Slovakia | 2012 | 1.21351  | 0.711767 |
| Slovakia | 2013 | 1.232331 | 0.720047 |
| Slovakia | 2014 | 1.222608 | 0.714766 |
| Slovakia | 2015 | 1.233158 | 0.725429 |

|    |          |      |          |          |
|----|----------|------|----------|----------|
| 1  |          |      |          |          |
| 2  |          |      |          |          |
| 3  |          |      |          |          |
| 4  |          |      |          |          |
| 5  | Slovakia | 2016 | 1.258443 | 0.742765 |
| 6  | Slovakia | 2017 | 1.250698 | 0.743898 |
| 7  | Slovakia | 2018 | 1.27032  | 0.760949 |
| 8  | Slovakia | 2019 | 1.267158 | 0.765874 |
| 9  |          |      |          |          |
| 10 | Slovenia | 1990 | 1.394688 | 0.780119 |
| 11 | Slovenia | 1991 | 1.410467 | 0.783523 |
| 12 | Slovenia | 1992 | 1.400783 | 0.768944 |
| 13 | Slovenia | 1993 | 1.378885 | 0.753192 |
| 14 | Slovenia | 1994 | 1.367196 | 0.740969 |
| 15 | Slovenia | 1995 | 1.317961 | 0.708775 |
| 16 | Slovenia | 1996 | 1.350995 | 0.720329 |
| 17 | Slovenia | 1997 | 1.295705 | 0.687694 |
| 18 | Slovenia | 1998 | 1.251271 | 0.658323 |
| 19 | Slovenia | 1999 | 1.262306 | 0.65755  |
| 20 | Slovenia | 2000 | 1.298258 | 0.663913 |
| 21 | Slovenia | 2001 | 1.266181 | 0.640215 |
| 22 | Slovenia | 2002 | 1.25989  | 0.622485 |
| 23 | Slovenia | 2003 | 1.165627 | 0.569175 |
| 24 | Slovenia | 2004 | 1.286114 | 0.622716 |
| 25 | Slovenia | 2005 | 1.400384 | 0.668478 |
| 26 | Slovenia | 2006 | 1.322378 | 0.627958 |
| 27 | Slovenia | 2007 | 1.411386 | 0.663917 |
| 28 | Slovenia | 2008 | 1.384634 | 0.647061 |
| 29 | Slovenia | 2009 | 1.44464  | 0.669581 |
| 30 | Slovenia | 2010 | 1.445478 | 0.668507 |
| 31 |          |      |          |          |
| 32 |          |      |          |          |
| 33 |          |      |          |          |
| 34 |          |      |          |          |
| 35 |          |      |          |          |
| 36 |          |      |          |          |
| 37 |          |      |          |          |
| 38 |          |      |          |          |
| 39 |          |      |          |          |
| 40 |          |      |          |          |
| 41 |          |      |          |          |
| 42 |          |      |          |          |
| 43 |          |      |          |          |
| 44 |          |      |          |          |
| 45 |          |      |          |          |
| 46 |          |      |          |          |

1  
2  
3  
4  
5  
6  
7  
8  
9  
10  
11  
12  
13  
14  
15  
16  
17  
18  
19  
20  
21  
22  
23  
24  
25  
26  
27  
28  
29  
30  
31  
32  
33  
34  
35  
36  
37  
38  
39  
40  
41  
42  
43  
44  
45  
46

|                 |      |          |          |
|-----------------|------|----------|----------|
| Slovenia        | 2011 | 1.438805 | 0.663727 |
| Slovenia        | 2012 | 1.439959 | 0.665578 |
| Slovenia        | 2013 | 1.378243 | 0.641181 |
| Slovenia        | 2014 | 1.367799 | 0.636246 |
| Slovenia        | 2015 | 1.284322 | 0.602005 |
| Slovenia        | 2016 | 1.278014 | 0.603165 |
| Slovenia        | 2017 | 1.264785 | 0.601053 |
| Slovenia        | 2018 | 1.263189 | 0.607731 |
| Slovenia        | 2019 | 1.258858 | 0.612691 |
| Solomon Islands | 1990 | 1.037928 | 1.144353 |
| Solomon Islands | 1991 | 1.044417 | 1.148198 |
| Solomon Islands | 1992 | 1.056013 | 1.156976 |
| Solomon Islands | 1993 | 1.066592 | 1.164159 |
| Solomon Islands | 1994 | 1.081983 | 1.175924 |
| Solomon Islands | 1995 | 1.097222 | 1.188241 |
| Solomon Islands | 1996 | 1.117544 | 1.206361 |
| Solomon Islands | 1997 | 1.138033 | 1.223701 |
| Solomon Islands | 1998 | 1.159552 | 1.241819 |
| Solomon Islands | 1999 | 1.178626 | 1.257071 |
| Solomon Islands | 2000 | 1.186507 | 1.258405 |
| Solomon Islands | 2001 | 1.182493 | 1.246874 |
| Solomon Islands | 2002 | 1.179042 | 1.236279 |
| Solomon Islands | 2003 | 1.182097 | 1.232562 |
| Solomon Islands | 2004 | 1.190252 | 1.233961 |
| Solomon Islands | 2005 | 1.191227 | 1.229107 |

|                 |      |          |          |
|-----------------|------|----------|----------|
| Solomon Islands | 2006 | 1.175755 | 1.207357 |
| Solomon Islands | 2007 | 1.14858  | 1.174414 |
| Solomon Islands | 2008 | 1.102099 | 1.123378 |
| Solomon Islands | 2009 | 1.094535 | 1.111581 |
| Solomon Islands | 2010 | 1.074319 | 1.088844 |
| Solomon Islands | 2011 | 1.065332 | 1.078571 |
| Solomon Islands | 2012 | 1.049638 | 1.061376 |
| Solomon Islands | 2013 | 1.034952 | 1.044876 |
| Solomon Islands | 2014 | 1.026433 | 1.034451 |
| Solomon Islands | 2015 | 1.016654 | 1.022379 |
| Solomon Islands | 2016 | 1.007093 | 1.010933 |
| Solomon Islands | 2017 | 0.991614 | 0.993079 |
| Solomon Islands | 2018 | 0.970301 | 0.971456 |
| Solomon Islands | 2019 | 0.977609 | 0.976166 |
| Somalia         | 1990 | 0.750322 | 0.611496 |
| Somalia         | 1991 | 0.74324  | 0.601044 |
| Somalia         | 1992 | 0.728936 | 0.588467 |
| Somalia         | 1993 | 0.714142 | 0.574841 |
| Somalia         | 1994 | 0.705603 | 0.566449 |
| Somalia         | 1995 | 0.699071 | 0.560185 |
| Somalia         | 1996 | 0.704283 | 0.563338 |
| Somalia         | 1997 | 0.712917 | 0.569484 |
| Somalia         | 1998 | 0.723135 | 0.5768   |
| Somalia         | 1999 | 0.733781 | 0.58339  |
| Somalia         | 2000 | 0.743    | 0.588414 |

1  
2  
3  
4  
5  
6  
7  
8  
9  
10  
11  
12  
13  
14  
15  
16  
17  
18  
19  
20  
21  
22  
23  
24  
25  
26  
27  
28  
29  
30  
31  
32  
33  
34  
35  
36  
37  
38  
39  
40  
41  
42  
43  
44  
45  
46

|              |      |          |          |
|--------------|------|----------|----------|
| Somalia      | 2001 | 0.755732 | 0.596479 |
| Somalia      | 2002 | 0.769071 | 0.604926 |
| Somalia      | 2003 | 0.784596 | 0.615255 |
| Somalia      | 2004 | 0.799497 | 0.62424  |
| Somalia      | 2005 | 0.813829 | 0.632367 |
| Somalia      | 2006 | 0.821399 | 0.634753 |
| Somalia      | 2007 | 0.832464 | 0.639935 |
| Somalia      | 2008 | 0.844469 | 0.644877 |
| Somalia      | 2009 | 0.85818  | 0.653139 |
| Somalia      | 2010 | 0.85573  | 0.64884  |
| Somalia      | 2011 | 0.853771 | 0.646719 |
| Somalia      | 2012 | 0.851149 | 0.646331 |
| Somalia      | 2013 | 0.850363 | 0.64823  |
| Somalia      | 2014 | 0.848187 | 0.649933 |
| Somalia      | 2015 | 0.846803 | 0.652619 |
| Somalia      | 2016 | 0.845299 | 0.654947 |
| Somalia      | 2017 | 0.842177 | 0.656193 |
| Somalia      | 2018 | 0.839293 | 0.655624 |
| Somalia      | 2019 | 0.839583 | 0.657314 |
| South Africa | 1990 | 0.872624 | 0.604062 |
| South Africa | 1991 | 0.844694 | 0.582752 |
| South Africa | 1992 | 0.912175 | 0.626358 |
| South Africa | 1993 | 0.863401 | 0.593813 |
| South Africa | 1994 | 0.89675  | 0.613044 |
| South Africa | 1995 | 0.800476 | 0.54839  |

|    |              |      |          |          |
|----|--------------|------|----------|----------|
| 1  |              |      |          |          |
| 2  |              |      |          |          |
| 3  |              |      |          |          |
| 4  |              |      |          |          |
| 5  | South Africa | 1996 | 0.806957 | 0.550274 |
| 6  | South Africa | 1997 | 0.857876 | 0.580401 |
| 7  | South Africa | 1998 | 0.839139 | 0.565984 |
| 8  | South Africa | 1999 | 0.862781 | 0.575683 |
| 9  | South Africa | 2000 | 0.883991 | 0.586252 |
| 10 | South Africa | 2001 | 0.882307 | 0.581695 |
| 11 | South Africa | 2002 | 0.886612 | 0.581614 |
| 12 | South Africa | 2003 | 0.883797 | 0.577566 |
| 13 | South Africa | 2004 | 0.881778 | 0.576085 |
| 14 | South Africa | 2005 | 0.876284 | 0.573943 |
| 15 | South Africa | 2006 | 0.875827 | 0.572977 |
| 16 | South Africa | 2007 | 0.865365 | 0.567608 |
| 17 | South Africa | 2008 | 0.86076  | 0.56512  |
| 18 | South Africa | 2009 | 0.858824 | 0.563312 |
| 19 | South Africa | 2010 | 0.859822 | 0.560691 |
| 20 | South Africa | 2011 | 0.874497 | 0.566917 |
| 21 | South Africa | 2012 | 0.883077 | 0.573793 |
| 22 | South Africa | 2013 | 0.891229 | 0.580179 |
| 23 | South Africa | 2014 | 0.904752 | 0.590606 |
| 24 | South Africa | 2015 | 0.907736 | 0.594396 |
| 25 | South Africa | 2016 | 0.90994  | 0.594798 |
| 26 | South Africa | 2017 | 0.893752 | 0.587799 |
| 27 | South Africa | 2018 | 0.874707 | 0.580501 |
| 28 | South Africa | 2019 | 0.872436 | 0.582659 |
| 29 | South Africa | 2019 | 0.872436 | 0.582659 |
| 30 | South Africa | 2019 | 0.872436 | 0.582659 |
| 31 | South Africa | 2019 | 0.872436 | 0.582659 |
| 32 | South Africa | 2019 | 0.872436 | 0.582659 |
| 33 | South Africa | 2019 | 0.872436 | 0.582659 |
| 34 | South Africa | 2019 | 0.872436 | 0.582659 |
| 35 | South Africa | 2019 | 0.872436 | 0.582659 |
| 36 | South Africa | 2019 | 0.872436 | 0.582659 |
| 37 | South Sudan  | 1990 | 0.617642 | 0.646117 |
| 38 |              |      |          |          |
| 39 |              |      |          |          |
| 40 |              |      |          |          |
| 41 |              |      |          |          |
| 42 |              |      |          |          |
| 43 |              |      |          |          |
| 44 |              |      |          |          |
| 45 |              |      |          |          |
| 46 |              |      |          |          |

|    |             |      |          |          |
|----|-------------|------|----------|----------|
| 1  |             |      |          |          |
| 2  |             |      |          |          |
| 3  |             |      |          |          |
| 4  |             |      |          |          |
| 5  | South Sudan | 1991 | 0.608182 | 0.639096 |
| 6  | South Sudan | 1992 | 0.59649  | 0.630499 |
| 7  | South Sudan | 1993 | 0.583919 | 0.620618 |
| 8  | South Sudan | 1994 | 0.575092 | 0.614212 |
| 9  | South Sudan | 1995 | 0.56239  | 0.606514 |
| 10 | South Sudan | 1996 | 0.563369 | 0.609884 |
| 11 | South Sudan | 1997 | 0.563668 | 0.611578 |
| 12 | South Sudan | 1998 | 0.567632 | 0.617846 |
| 13 | South Sudan | 1999 | 0.571434 | 0.623961 |
| 14 | South Sudan | 2000 | 0.574652 | 0.628503 |
| 15 | South Sudan | 2001 | 0.579118 | 0.634668 |
| 16 | South Sudan | 2002 | 0.583072 | 0.639749 |
| 17 | South Sudan | 2003 | 0.588461 | 0.647561 |
| 18 | South Sudan | 2004 | 0.592934 | 0.651815 |
| 19 | South Sudan | 2005 | 0.600938 | 0.657757 |
| 20 | South Sudan | 2006 | 0.602378 | 0.65759  |
| 21 | South Sudan | 2007 | 0.601339 | 0.654603 |
| 22 | South Sudan | 2008 | 0.600134 | 0.650473 |
| 23 | South Sudan | 2009 | 0.605369 | 0.654527 |
| 24 | South Sudan | 2010 | 0.609132 | 0.657795 |
| 25 | South Sudan | 2011 | 0.617707 | 0.666383 |
| 26 | South Sudan | 2012 | 0.626237 | 0.674514 |
| 27 | South Sudan | 2013 | 0.637096 | 0.682281 |
| 28 | South Sudan | 2014 | 0.646201 | 0.689662 |
| 29 | South Sudan | 2015 | 0.658325 | 0.698963 |
| 30 |             |      |          |          |
| 31 |             |      |          |          |
| 32 |             |      |          |          |
| 33 |             |      |          |          |
| 34 |             |      |          |          |
| 35 |             |      |          |          |
| 36 |             |      |          |          |
| 37 |             |      |          |          |
| 38 |             |      |          |          |
| 39 |             |      |          |          |
| 40 |             |      |          |          |
| 41 |             |      |          |          |
| 42 |             |      |          |          |
| 43 |             |      |          |          |
| 44 |             |      |          |          |
| 45 |             |      |          |          |
| 46 |             |      |          |          |

|    |             |      |          |          |
|----|-------------|------|----------|----------|
| 1  |             |      |          |          |
| 2  |             |      |          |          |
| 3  |             |      |          |          |
| 4  |             |      |          |          |
| 5  | South Sudan | 2016 | 0.66504  | 0.704405 |
| 6  | South Sudan | 2017 | 0.668702 | 0.710524 |
| 7  | South Sudan | 2018 | 0.674969 | 0.717543 |
| 8  | South Sudan | 2019 | 0.681735 | 0.723315 |
| 9  |             |      |          |          |
| 10 | Spain       | 1990 | 1.141463 | 0.683647 |
| 11 | Spain       | 1991 | 1.147613 | 0.682843 |
| 12 | Spain       | 1992 | 1.158914 | 0.68726  |
| 13 | Spain       | 1993 | 1.175718 | 0.693078 |
| 14 | Spain       | 1994 | 1.192094 | 0.698995 |
| 15 | Spain       | 1995 | 1.19173  | 0.693909 |
| 16 | Spain       | 1996 | 1.207036 | 0.697607 |
| 17 | Spain       | 1997 | 1.226235 | 0.7048   |
| 18 | Spain       | 1998 | 1.217732 | 0.695168 |
| 19 | Spain       | 1999 | 1.20048  | 0.682673 |
| 20 | Spain       | 2000 | 1.228318 | 0.693744 |
| 21 | Spain       | 2001 | 1.242731 | 0.698067 |
| 22 | Spain       | 2002 | 1.238513 | 0.693436 |
| 23 | Spain       | 2003 | 1.246203 | 0.693896 |
| 24 | Spain       | 2004 | 1.251368 | 0.694341 |
| 25 | Spain       | 2005 | 1.253901 | 0.692857 |
| 26 | Spain       | 2006 | 1.261916 | 0.693236 |
| 27 | Spain       | 2007 | 1.25726  | 0.689482 |
| 28 | Spain       | 2008 | 1.266641 | 0.690584 |
| 29 | Spain       | 2009 | 1.271022 | 0.691003 |
| 30 | Spain       | 2010 | 1.264498 | 0.682622 |
| 31 |             |      |          |          |
| 32 |             |      |          |          |
| 33 |             |      |          |          |
| 34 |             |      |          |          |
| 35 |             |      |          |          |
| 36 |             |      |          |          |
| 37 |             |      |          |          |
| 38 |             |      |          |          |
| 39 |             |      |          |          |
| 40 |             |      |          |          |
| 41 |             |      |          |          |
| 42 |             |      |          |          |
| 43 |             |      |          |          |
| 44 |             |      |          |          |
| 45 |             |      |          |          |
| 46 |             |      |          |          |



1  
2  
3  
4  
5  
6  
7  
8  
9  
10  
11  
12  
13  
14  
15  
16  
17  
18  
19  
20  
21  
22  
23  
24  
25  
26  
27  
28  
29  
30  
31  
32  
33  
34  
35  
36  
37  
38  
39  
40  
41  
42  
43  
44  
45  
46

|           |      |          |          |
|-----------|------|----------|----------|
| Spain     | 2011 | 1.291473 | 0.694299 |
| Spain     | 2012 | 1.314847 | 0.704675 |
| Spain     | 2013 | 1.344507 | 0.71982  |
| Spain     | 2014 | 1.360219 | 0.725666 |
| Spain     | 2015 | 1.372704 | 0.730595 |
| Spain     | 2016 | 1.381235 | 0.734868 |
| Spain     | 2017 | 1.36967  | 0.731334 |
| Spain     | 2018 | 1.393998 | 0.747474 |
| Spain     | 2019 | 1.395263 | 0.752339 |
| Sri Lanka | 1990 | 0.565329 | 0.584802 |
| Sri Lanka | 1991 | 0.578904 | 0.591445 |
| Sri Lanka | 1992 | 0.585931 | 0.589963 |
| Sri Lanka | 1993 | 0.613223 | 0.609778 |
| Sri Lanka | 1994 | 0.622568 | 0.615605 |
| Sri Lanka | 1995 | 0.602386 | 0.593602 |
| Sri Lanka | 1996 | 0.63306  | 0.6159   |
| Sri Lanka | 1997 | 0.659262 | 0.633113 |
| Sri Lanka | 1998 | 0.676796 | 0.64036  |
| Sri Lanka | 1999 | 0.692609 | 0.64573  |
| Sri Lanka | 2000 | 0.697856 | 0.645993 |
| Sri Lanka | 2001 | 0.702683 | 0.642068 |
| Sri Lanka | 2002 | 0.734883 | 0.662004 |
| Sri Lanka | 2003 | 0.748233 | 0.669226 |
| Sri Lanka | 2004 | 0.782674 | 0.693991 |
| Sri Lanka | 2005 | 0.793452 | 0.698699 |

|           |      |          |          |
|-----------|------|----------|----------|
| Sri Lanka | 2006 | 0.819849 | 0.71548  |
| Sri Lanka | 2007 | 0.814719 | 0.702651 |
| Sri Lanka | 2008 | 0.806527 | 0.685378 |
| Sri Lanka | 2009 | 0.883706 | 0.741235 |
| Sri Lanka | 2010 | 0.855375 | 0.717334 |
| Sri Lanka | 2011 | 0.818618 | 0.683409 |
| Sri Lanka | 2012 | 0.786608 | 0.649113 |
| Sri Lanka | 2013 | 0.801781 | 0.655676 |
| Sri Lanka | 2014 | 0.796339 | 0.645695 |
| Sri Lanka | 2015 | 0.801576 | 0.645614 |
| Sri Lanka | 2016 | 0.807734 | 0.645914 |
| Sri Lanka | 2017 | 0.816588 | 0.648192 |
| Sri Lanka | 2018 | 0.838493 | 0.661592 |
| Sri Lanka | 2019 | 0.845783 | 0.662182 |
| Sudan     | 1990 | 0.915215 | 0.883364 |
| Sudan     | 1991 | 0.89466  | 0.868908 |
| Sudan     | 1992 | 0.88086  | 0.859938 |
| Sudan     | 1993 | 0.868571 | 0.852353 |
| Sudan     | 1994 | 0.862812 | 0.850964 |
| Sudan     | 1995 | 0.858514 | 0.851763 |
| Sudan     | 1996 | 0.854869 | 0.853362 |
| Sudan     | 1997 | 0.848693 | 0.851978 |
| Sudan     | 1998 | 0.841506 | 0.849976 |
| Sudan     | 1999 | 0.8354   | 0.848705 |
| Sudan     | 2000 | 0.832796 | 0.850843 |

|          |      |          |          |
|----------|------|----------|----------|
| Sudan    | 2001 | 0.834451 | 0.85806  |
| Sudan    | 2002 | 0.832769 | 0.861836 |
| Sudan    | 2003 | 0.833939 | 0.869412 |
| Sudan    | 2004 | 0.839011 | 0.879915 |
| Sudan    | 2005 | 0.849835 | 0.89299  |
| Sudan    | 2006 | 0.838268 | 0.884609 |
| Sudan    | 2007 | 0.824546 | 0.874958 |
| Sudan    | 2008 | 0.810984 | 0.865859 |
| Sudan    | 2009 | 0.802669 | 0.861309 |
| Sudan    | 2010 | 0.796912 | 0.861204 |
| Sudan    | 2011 | 0.795754 | 0.865036 |
| Sudan    | 2012 | 0.79713  | 0.870054 |
| Sudan    | 2013 | 0.8      | 0.877201 |
| Sudan    | 2014 | 0.808748 | 0.88856  |
| Sudan    | 2015 | 0.816839 | 0.901218 |
| Sudan    | 2016 | 0.822954 | 0.911158 |
| Sudan    | 2017 | 0.829787 | 0.921163 |
| Sudan    | 2018 | 0.833647 | 0.928108 |
| Sudan    | 2019 | 0.836752 | 0.93243  |
| Suriname | 1990 | 0.787543 | 0.676472 |
| Suriname | 1991 | 0.773625 | 0.664525 |
| Suriname | 1992 | 0.762927 | 0.657532 |
| Suriname | 1993 | 0.735734 | 0.635602 |
| Suriname | 1994 | 0.730993 | 0.63073  |
| Suriname | 1995 | 0.749511 | 0.643204 |

|          |      |          |          |
|----------|------|----------|----------|
| Suriname | 1996 | 0.753184 | 0.648987 |
| Suriname | 1997 | 0.72162  | 0.620651 |
| Suriname | 1998 | 0.689955 | 0.59407  |
| Suriname | 1999 | 0.717914 | 0.623254 |
| Suriname | 2000 | 0.729871 | 0.626825 |
| Suriname | 2001 | 0.739779 | 0.625425 |
| Suriname | 2002 | 0.768182 | 0.652205 |
| Suriname | 2003 | 0.759013 | 0.647365 |
| Suriname | 2004 | 0.789716 | 0.673453 |
| Suriname | 2005 | 0.792861 | 0.669835 |
| Suriname | 2006 | 0.809596 | 0.685651 |
| Suriname | 2007 | 0.794531 | 0.673183 |
| Suriname | 2008 | 0.783635 | 0.659421 |
| Suriname | 2009 | 0.795851 | 0.66849  |
| Suriname | 2010 | 0.777593 | 0.653797 |
| Suriname | 2011 | 0.790986 | 0.667096 |
| Suriname | 2012 | 0.803316 | 0.677208 |
| Suriname | 2013 | 0.781261 | 0.653612 |
| Suriname | 2014 | 0.786669 | 0.651621 |
| Suriname | 2015 | 0.81729  | 0.675948 |
| Suriname | 2016 | 0.837001 | 0.69061  |
| Suriname | 2017 | 0.845809 | 0.696292 |
| Suriname | 2018 | 0.857382 | 0.703866 |
| Suriname | 2019 | 0.874242 | 0.715426 |
| Sweden   | 1990 | 0.754326 | 0.463779 |

|        |      |          |          |
|--------|------|----------|----------|
| Sweden | 1991 | 0.743543 | 0.454427 |
| Sweden | 1992 | 0.750763 | 0.455035 |
| Sweden | 1993 | 0.739427 | 0.445076 |
| Sweden | 1994 | 0.745978 | 0.44729  |
| Sweden | 1995 | 0.748424 | 0.448184 |
| Sweden | 1996 | 0.781246 | 0.465371 |
| Sweden | 1997 | 0.792434 | 0.470712 |
| Sweden | 1998 | 0.797746 | 0.471452 |
| Sweden | 1999 | 0.810983 | 0.477167 |
| Sweden | 2000 | 0.846597 | 0.497609 |
| Sweden | 2001 | 0.846216 | 0.497371 |
| Sweden | 2002 | 0.854622 | 0.502943 |
| Sweden | 2003 | 0.852701 | 0.503031 |
| Sweden | 2004 | 0.849916 | 0.501095 |
| Sweden | 2005 | 0.861536 | 0.509177 |
| Sweden | 2006 | 0.895253 | 0.529417 |
| Sweden | 2007 | 0.912485 | 0.538504 |
| Sweden | 2008 | 0.914439 | 0.542118 |
| Sweden | 2009 | 0.913988 | 0.54386  |
| Sweden | 2010 | 0.939152 | 0.560356 |
| Sweden | 2011 | 0.944867 | 0.567629 |
| Sweden | 2012 | 0.948257 | 0.574409 |
| Sweden | 2013 | 0.960872 | 0.587228 |
| Sweden | 2014 | 0.971413 | 0.598792 |
| Sweden | 2015 | 0.963536 | 0.59731  |

|             |      |          |          |
|-------------|------|----------|----------|
| Sweden      | 2016 | 0.968405 | 0.604055 |
| Sweden      | 2017 | 0.963346 | 0.608837 |
| Sweden      | 2018 | 0.949485 | 0.613392 |
| Sweden      | 2019 | 0.9058   | 0.598532 |
| Switzerland | 1990 | 1.062104 | 0.561863 |
| Switzerland | 1991 | 1.085297 | 0.574003 |
| Switzerland | 1992 | 1.118409 | 0.592365 |
| Switzerland | 1993 | 1.151731 | 0.609078 |
| Switzerland | 1994 | 1.192699 | 0.630941 |
| Switzerland | 1995 | 1.214237 | 0.642122 |
| Switzerland | 1996 | 1.241375 | 0.653118 |
| Switzerland | 1997 | 1.258971 | 0.662246 |
| Switzerland | 1998 | 1.265703 | 0.664328 |
| Switzerland | 1999 | 1.290294 | 0.675357 |
| Switzerland | 2000 | 1.342631 | 0.69972  |
| Switzerland | 2001 | 1.37058  | 0.709901 |
| Switzerland | 2002 | 1.38254  | 0.715449 |
| Switzerland | 2003 | 1.407761 | 0.727    |
| Switzerland | 2004 | 1.433706 | 0.740367 |
| Switzerland | 2005 | 1.469206 | 0.757813 |
| Switzerland | 2006 | 1.471483 | 0.759842 |
| Switzerland | 2007 | 1.473616 | 0.761116 |
| Switzerland | 2008 | 1.497778 | 0.778024 |
| Switzerland | 2009 | 1.497785 | 0.78351  |
| Switzerland | 2010 | 1.481958 | 0.781891 |

1  
2  
3  
4  
5  
6  
7  
8  
9  
10  
11  
12  
13  
14  
15  
16  
17  
18  
19  
20  
21  
22  
23  
24  
25  
26  
27  
28  
29  
30  
31  
32  
33  
34  
35  
36  
37  
38  
39  
40  
41  
42  
43  
44  
45  
46

|                      |      |          |          |
|----------------------|------|----------|----------|
| Switzerland          | 2011 | 1.467667 | 0.77742  |
| Switzerland          | 2012 | 1.488953 | 0.789545 |
| Switzerland          | 2013 | 1.487406 | 0.790652 |
| Switzerland          | 2014 | 1.488658 | 0.792981 |
| Switzerland          | 2015 | 1.465689 | 0.780309 |
| Switzerland          | 2016 | 1.478698 | 0.796645 |
| Switzerland          | 2017 | 1.447048 | 0.795428 |
| Switzerland          | 2018 | 1.438361 | 0.801749 |
| Switzerland          | 2019 | 1.413788 | 0.800998 |
| Syrian Arab Republic | 1990 | 0.917479 | 1.018136 |
| Syrian Arab Republic | 1991 | 0.91471  | 1.035383 |
| Syrian Arab Republic | 1992 | 0.91309  | 1.052004 |
| Syrian Arab Republic | 1993 | 0.888644 | 1.046973 |
| Syrian Arab Republic | 1994 | 0.905732 | 1.091777 |
| Syrian Arab Republic | 1995 | 0.9339   | 1.155488 |
| Syrian Arab Republic | 1996 | 0.935203 | 1.179075 |
| Syrian Arab Republic | 1997 | 0.926363 | 1.188127 |
| Syrian Arab Republic | 1998 | 0.940655 | 1.218168 |
| Syrian Arab Republic | 1999 | 0.924891 | 1.217608 |
| Syrian Arab Republic | 2000 | 0.917348 | 1.226316 |
| Syrian Arab Republic | 2001 | 0.901886 | 1.202629 |
| Syrian Arab Republic | 2002 | 0.891482 | 1.176015 |
| Syrian Arab Republic | 2003 | 0.877832 | 1.168175 |
| Syrian Arab Republic | 2004 | 0.894141 | 1.205428 |
| Syrian Arab Republic | 2005 | 0.891503 | 1.221358 |

|                            |      |          |          |
|----------------------------|------|----------|----------|
| Syrian Arab Republic       | 2006 | 0.89491  | 1.244382 |
| Syrian Arab Republic       | 2007 | 0.875609 | 1.230146 |
| Syrian Arab Republic       | 2008 | 0.854031 | 1.180682 |
| Syrian Arab Republic       | 2009 | 0.870141 | 1.206509 |
| Syrian Arab Republic       | 2010 | 0.909359 | 1.261294 |
| Syrian Arab Republic       | 2011 | 0.9272   | 1.277259 |
| Syrian Arab Republic       | 2012 | 0.939035 | 1.265399 |
| Syrian Arab Republic       | 2013 | 0.958657 | 1.276741 |
| Syrian Arab Republic       | 2014 | 0.975687 | 1.28192  |
| Syrian Arab Republic       | 2015 | 0.986622 | 1.266201 |
| Syrian Arab Republic       | 2016 | 0.993034 | 1.255924 |
| Syrian Arab Republic       | 2017 | 0.998276 | 1.248525 |
| Syrian Arab Republic       | 2018 | 1.004023 | 1.245232 |
| Syrian Arab Republic       | 2019 | 1.005204 | 1.238992 |
| Taiwan (Province of China) | 1990 | 0.985425 | 1.011569 |
| Taiwan (Province of China) | 1991 | 0.995354 | 1.029026 |
| Taiwan (Province of China) | 1992 | 0.985887 | 1.02406  |
| Taiwan (Province of China) | 1993 | 0.989273 | 1.033343 |
| Taiwan (Province of China) | 1994 | 0.954842 | 1.005088 |
| Taiwan (Province of China) | 1995 | 0.961873 | 1.010782 |
| Taiwan (Province of China) | 1996 | 0.968368 | 1.020645 |
| Taiwan (Province of China) | 1997 | 0.964296 | 1.015286 |
| Taiwan (Province of China) | 1998 | 0.979169 | 1.027264 |
| Taiwan (Province of China) | 1999 | 1.002197 | 1.050918 |
| Taiwan (Province of China) | 2000 | 1.009383 | 1.056412 |



1  
2  
3  
4  
5  
6  
7  
8  
9  
10  
11  
12  
13  
14  
15  
16  
17  
18  
19  
20  
21  
22  
23  
24  
25  
26  
27  
28  
29  
30  
31  
32  
33  
34  
35  
36  
37  
38  
39  
40  
41  
42  
43  
44  
45  
46

|                            |      |          |          |
|----------------------------|------|----------|----------|
| Taiwan (Province of China) | 2001 | 1.009354 | 1.054034 |
| Taiwan (Province of China) | 2002 | 1.006938 | 1.043543 |
| Taiwan (Province of China) | 2003 | 1.017283 | 1.046037 |
| Taiwan (Province of China) | 2004 | 0.985298 | 1.009895 |
| Taiwan (Province of China) | 2005 | 0.980931 | 0.996768 |
| Taiwan (Province of China) | 2006 | 0.960976 | 0.966534 |
| Taiwan (Province of China) | 2007 | 0.981744 | 0.975252 |
| Taiwan (Province of China) | 2008 | 0.983518 | 0.965808 |
| Taiwan (Province of China) | 2009 | 0.999055 | 0.974124 |
| Taiwan (Province of China) | 2010 | 1.015987 | 0.975085 |
| Taiwan (Province of China) | 2011 | 0.98816  | 0.932321 |
| Taiwan (Province of China) | 2012 | 1.011285 | 0.935788 |
| Taiwan (Province of China) | 2013 | 1.014673 | 0.921141 |
| Taiwan (Province of China) | 2014 | 1.017774 | 0.913073 |
| Taiwan (Province of China) | 2015 | 1.017308 | 0.894752 |
| Taiwan (Province of China) | 2016 | 1.028637 | 0.885786 |
| Taiwan (Province of China) | 2017 | 1.049592 | 0.8845   |
| Taiwan (Province of China) | 2018 | 1.075771 | 0.889571 |
| Taiwan (Province of China) | 2019 | 1.085295 | 0.890293 |
| Tajikistan                 | 1990 | 1.073056 | 0.767723 |
| Tajikistan                 | 1991 | 1.087627 | 0.781103 |
| Tajikistan                 | 1992 | 1.074775 | 0.788456 |
| Tajikistan                 | 1993 | 1.104223 | 0.815629 |
| Tajikistan                 | 1994 | 1.111487 | 0.817704 |
| Tajikistan                 | 1995 | 1.082798 | 0.781517 |

|            |      |          |          |
|------------|------|----------|----------|
| Tajikistan | 1996 | 0.997321 | 0.703395 |
| Tajikistan | 1997 | 1.021929 | 0.708641 |
| Tajikistan | 1998 | 1.09509  | 0.757133 |
| Tajikistan | 1999 | 1.097986 | 0.769817 |
| Tajikistan | 2000 | 1.075764 | 0.773095 |
| Tajikistan | 2001 | 1.058164 | 0.766786 |
| Tajikistan | 2002 | 0.994554 | 0.740537 |
| Tajikistan | 2003 | 0.967197 | 0.738701 |
| Tajikistan | 2004 | 0.958714 | 0.745795 |
| Tajikistan | 2005 | 0.927086 | 0.725698 |
| Tajikistan | 2006 | 0.886752 | 0.692502 |
| Tajikistan | 2007 | 0.862094 | 0.673144 |
| Tajikistan | 2008 | 0.850079 | 0.661517 |
| Tajikistan | 2009 | 0.847407 | 0.659561 |
| Tajikistan | 2010 | 0.845459 | 0.657416 |
| Tajikistan | 2011 | 0.850017 | 0.665894 |
| Tajikistan | 2012 | 0.844328 | 0.666285 |
| Tajikistan | 2013 | 0.828206 | 0.64234  |
| Tajikistan | 2014 | 0.821117 | 0.634306 |
| Tajikistan | 2015 | 0.821088 | 0.630952 |
| Tajikistan | 2016 | 0.82218  | 0.628012 |
| Tajikistan | 2017 | 0.840047 | 0.6362   |
| Tajikistan | 2018 | 0.858145 | 0.653595 |
| Tajikistan | 2019 | 0.86892  | 0.663584 |
| Thailand   | 1990 | 0.681059 | 0.588169 |

|    |          |      |          |          |
|----|----------|------|----------|----------|
| 1  |          |      |          |          |
| 2  |          |      |          |          |
| 3  |          |      |          |          |
| 4  |          |      |          |          |
| 5  | Thailand | 1991 | 0.680018 | 0.593022 |
| 6  | Thailand | 1992 | 0.670693 | 0.590228 |
| 7  | Thailand | 1993 | 0.657486 | 0.586194 |
| 8  | Thailand | 1994 | 0.642782 | 0.582624 |
| 9  | Thailand | 1995 | 0.629929 | 0.578302 |
| 10 | Thailand | 1996 | 0.647371 | 0.596895 |
| 11 | Thailand | 1997 | 0.687893 | 0.630446 |
| 12 | Thailand | 1998 | 0.706685 | 0.61792  |
| 13 | Thailand | 1999 | 0.762966 | 0.658819 |
| 14 | Thailand | 2000 | 0.841298 | 0.719716 |
| 15 | Thailand | 2001 | 0.932113 | 0.799463 |
| 16 | Thailand | 2002 | 1.033857 | 0.882983 |
| 17 | Thailand | 2003 | 1.098239 | 0.934802 |
| 18 | Thailand | 2004 | 1.172291 | 0.993394 |
| 19 | Thailand | 2005 | 1.228727 | 1.038246 |
| 20 | Thailand | 2006 | 1.247513 | 1.050587 |
| 21 | Thailand | 2007 | 1.266169 | 1.065646 |
| 22 | Thailand | 2008 | 1.276799 | 1.071992 |
| 23 | Thailand | 2009 | 1.271683 | 1.063155 |
| 24 | Thailand | 2010 | 1.270152 | 1.059761 |
| 25 | Thailand | 2011 | 1.247955 | 1.040133 |
| 26 | Thailand | 2012 | 1.227875 | 1.01986  |
| 27 | Thailand | 2013 | 1.211694 | 1.00092  |
| 28 | Thailand | 2014 | 1.194524 | 0.980393 |
| 29 | Thailand | 2015 | 1.165776 | 0.949129 |
| 30 |          |      |          |          |
| 31 |          |      |          |          |
| 32 |          |      |          |          |
| 33 |          |      |          |          |
| 34 |          |      |          |          |
| 35 |          |      |          |          |
| 36 |          |      |          |          |
| 37 |          |      |          |          |
| 38 |          |      |          |          |
| 39 |          |      |          |          |
| 40 |          |      |          |          |
| 41 |          |      |          |          |
| 42 |          |      |          |          |
| 43 |          |      |          |          |
| 44 |          |      |          |          |
| 45 |          |      |          |          |
| 46 |          |      |          |          |

|    |             |      |          |          |
|----|-------------|------|----------|----------|
| 1  |             |      |          |          |
| 2  |             |      |          |          |
| 3  |             |      |          |          |
| 4  |             |      |          |          |
| 5  | Thailand    | 2016 | 1.156813 | 0.934726 |
| 6  | Thailand    | 2017 | 1.164108 | 0.932472 |
| 7  | Thailand    | 2018 | 1.183666 | 0.940038 |
| 8  | Thailand    | 2019 | 1.203826 | 0.949717 |
| 9  |             |      |          |          |
| 10 | Timor-Leste | 1990 | 1.196681 | 1.155464 |
| 11 | Timor-Leste | 1991 | 1.183547 | 1.14905  |
| 12 | Timor-Leste | 1992 | 1.181926 | 1.153336 |
| 13 | Timor-Leste | 1993 | 1.18303  | 1.159541 |
| 14 | Timor-Leste | 1994 | 1.182152 | 1.16208  |
| 15 | Timor-Leste | 1995 | 1.180636 | 1.156541 |
| 16 | Timor-Leste | 1996 | 1.170038 | 1.148286 |
| 17 | Timor-Leste | 1997 | 1.164627 | 1.146855 |
| 18 | Timor-Leste | 1998 | 1.154785 | 1.144469 |
| 19 | Timor-Leste | 1999 | 1.124982 | 1.120679 |
| 20 | Timor-Leste | 2000 | 1.09484  | 1.088144 |
| 21 | Timor-Leste | 2001 | 1.068454 | 1.065474 |
| 22 | Timor-Leste | 2002 | 1.044813 | 1.045044 |
| 23 | Timor-Leste | 2003 | 1.021296 | 1.023366 |
| 24 | Timor-Leste | 2004 | 1.004261 | 1.007189 |
| 25 | Timor-Leste | 2005 | 0.995047 | 0.99295  |
| 26 | Timor-Leste | 2006 | 0.983217 | 0.979306 |
| 27 | Timor-Leste | 2007 | 0.97809  | 0.972303 |
| 28 | Timor-Leste | 2008 | 0.972901 | 0.96515  |
| 29 | Timor-Leste | 2009 | 0.958798 | 0.950179 |
| 30 | Timor-Leste | 2010 | 0.946263 | 0.931787 |
| 31 |             |      |          |          |
| 32 |             |      |          |          |
| 33 |             |      |          |          |
| 34 |             |      |          |          |
| 35 |             |      |          |          |
| 36 |             |      |          |          |
| 37 |             |      |          |          |
| 38 |             |      |          |          |
| 39 |             |      |          |          |
| 40 |             |      |          |          |
| 41 |             |      |          |          |
| 42 |             |      |          |          |
| 43 |             |      |          |          |
| 44 |             |      |          |          |
| 45 |             |      |          |          |
| 46 |             |      |          |          |

1  
2  
3  
4  
5  
6  
7  
8  
9  
10  
11  
12  
13  
14  
15  
16  
17  
18  
19  
20  
21  
22  
23  
24  
25  
26  
27  
28  
29  
30  
31  
32  
33  
34  
35  
36  
37  
38  
39  
40  
41  
42  
43  
44  
45  
46

|             |      |          |          |
|-------------|------|----------|----------|
| Timor-Leste | 2011 | 0.944849 | 0.929167 |
| Timor-Leste | 2012 | 0.937733 | 0.922057 |
| Timor-Leste | 2013 | 0.933499 | 0.917589 |
| Timor-Leste | 2014 | 0.93137  | 0.915053 |
| Timor-Leste | 2015 | 0.931167 | 0.907643 |
| Timor-Leste | 2016 | 0.928885 | 0.902893 |
| Timor-Leste | 2017 | 0.923472 | 0.896569 |
| Timor-Leste | 2018 | 0.919177 | 0.891868 |
| Timor-Leste | 2019 | 0.914942 | 0.887747 |
| Togo        | 1990 | 0.962346 | 0.830838 |
| Togo        | 1991 | 0.950342 | 0.818605 |
| Togo        | 1992 | 0.930765 | 0.801384 |
| Togo        | 1993 | 0.906439 | 0.7784   |
| Togo        | 1994 | 0.88443  | 0.755182 |
| Togo        | 1995 | 0.860386 | 0.73047  |
| Togo        | 1996 | 0.836479 | 0.708339 |
| Togo        | 1997 | 0.828206 | 0.695167 |
| Togo        | 1998 | 0.809561 | 0.674108 |
| Togo        | 1999 | 0.790023 | 0.656131 |
| Togo        | 2000 | 0.780961 | 0.645704 |
| Togo        | 2001 | 0.770827 | 0.6343   |
| Togo        | 2002 | 0.774135 | 0.631214 |
| Togo        | 2003 | 0.770561 | 0.623609 |
| Togo        | 2004 | 0.764903 | 0.614684 |
| Togo        | 2005 | 0.761828 | 0.607812 |

|         |      |          |          |
|---------|------|----------|----------|
| Togo    | 2006 | 0.761196 | 0.602424 |
| Togo    | 2007 | 0.771884 | 0.603577 |
| Togo    | 2008 | 0.773679 | 0.597014 |
| Togo    | 2009 | 0.777731 | 0.597059 |
| Togo    | 2010 | 0.780742 | 0.597078 |
| Togo    | 2011 | 0.791777 | 0.600911 |
| Togo    | 2012 | 0.807868 | 0.605235 |
| Togo    | 2013 | 0.817276 | 0.606995 |
| Togo    | 2014 | 0.824303 | 0.612965 |
| Togo    | 2015 | 0.831794 | 0.618577 |
| Togo    | 2016 | 0.842748 | 0.627372 |
| Togo    | 2017 | 0.857032 | 0.634987 |
| Togo    | 2018 | 0.871302 | 0.642024 |
| Togo    | 2019 | 0.880134 | 0.6488   |
| Tokelau | 1990 | 1.654136 | 1.365381 |
| Tokelau | 1991 | 1.642666 | 1.35864  |
| Tokelau | 1992 | 1.620669 | 1.35639  |
| Tokelau | 1993 | 1.593963 | 1.351673 |
| Tokelau | 1994 | 1.576672 | 1.351523 |
| Tokelau | 1995 | 1.567959 | 1.352706 |
| Tokelau | 1996 | 1.573466 | 1.356843 |
| Tokelau | 1997 | 1.591125 | 1.360109 |
| Tokelau | 1998 | 1.621783 | 1.361206 |
| Tokelau | 1999 | 1.651438 | 1.353628 |
| Tokelau | 2000 | 1.677927 | 1.343664 |

|         |      |          |          |
|---------|------|----------|----------|
| Tokelau | 2001 | 1.68679  | 1.32952  |
| Tokelau | 2002 | 1.678846 | 1.323954 |
| Tokelau | 2003 | 1.646445 | 1.313106 |
| Tokelau | 2004 | 1.619364 | 1.314728 |
| Tokelau | 2005 | 1.551954 | 1.285902 |
| Tokelau | 2006 | 1.493012 | 1.260807 |
| Tokelau | 2007 | 1.434987 | 1.228593 |
| Tokelau | 2008 | 1.397422 | 1.202485 |
| Tokelau | 2009 | 1.37992  | 1.185755 |
| Tokelau | 2010 | 1.373876 | 1.178019 |
| Tokelau | 2011 | 1.361942 | 1.171336 |
| Tokelau | 2012 | 1.345399 | 1.168842 |
| Tokelau | 2013 | 1.328842 | 1.169288 |
| Tokelau | 2014 | 1.305957 | 1.165686 |
| Tokelau | 2015 | 1.28582  | 1.16589  |
| Tokelau | 2016 | 1.265894 | 1.168574 |
| Tokelau | 2017 | 1.255581 | 1.18055  |
| Tokelau | 2018 | 1.248531 | 1.189306 |
| Tokelau | 2019 | 1.245695 | 1.197551 |
| Tonga   | 1990 | 1.137947 | 0.954422 |
| Tonga   | 1991 | 1.150946 | 0.963223 |
| Tonga   | 1992 | 1.153805 | 0.956807 |
| Tonga   | 1993 | 1.175571 | 0.972467 |
| Tonga   | 1994 | 1.198633 | 0.991896 |
| Tonga   | 1995 | 1.222674 | 1.012158 |

|                     |      |          |          |
|---------------------|------|----------|----------|
| Tonga               | 1996 | 1.214661 | 1.004611 |
| Tonga               | 1997 | 1.215995 | 1.005481 |
| Tonga               | 1998 | 1.184864 | 0.982384 |
| Tonga               | 1999 | 1.116171 | 0.924504 |
| Tonga               | 2000 | 1.092365 | 0.89794  |
| Tonga               | 2001 | 1.072194 | 0.876573 |
| Tonga               | 2002 | 1.025257 | 0.834568 |
| Tonga               | 2003 | 0.987728 | 0.798999 |
| Tonga               | 2004 | 0.996284 | 0.801134 |
| Tonga               | 2005 | 1.010378 | 0.812375 |
| Tonga               | 2006 | 0.959076 | 0.770036 |
| Tonga               | 2007 | 0.91288  | 0.731886 |
| Tonga               | 2008 | 0.87431  | 0.699518 |
| Tonga               | 2009 | 0.844102 | 0.673292 |
| Tonga               | 2010 | 0.824036 | 0.655058 |
| Tonga               | 2011 | 0.811065 | 0.642886 |
| Tonga               | 2012 | 0.803065 | 0.634647 |
| Tonga               | 2013 | 0.79368  | 0.625524 |
| Tonga               | 2014 | 0.789094 | 0.620129 |
| Tonga               | 2015 | 0.790241 | 0.619271 |
| Tonga               | 2016 | 0.79346  | 0.620084 |
| Tonga               | 2017 | 0.803721 | 0.626275 |
| Tonga               | 2018 | 0.811761 | 0.630899 |
| Tonga               | 2019 | 0.819439 | 0.635363 |
| Trinidad and Tobago | 1990 | 0.600964 | 0.489801 |



1  
2  
3  
4  
5  
6  
7  
8  
9  
10  
11  
12  
13  
14  
15  
16  
17  
18  
19  
20  
21  
22  
23  
24  
25  
26  
27  
28  
29  
30  
31  
32  
33  
34  
35  
36  
37  
38  
39  
40  
41  
42  
43  
44  
45  
46

|                     |      |          |          |
|---------------------|------|----------|----------|
| Trinidad and Tobago | 1991 | 0.627662 | 0.515626 |
| Trinidad and Tobago | 1992 | 0.606567 | 0.504513 |
| Trinidad and Tobago | 1993 | 0.64273  | 0.535968 |
| Trinidad and Tobago | 1994 | 0.643704 | 0.538284 |
| Trinidad and Tobago | 1995 | 0.699835 | 0.588405 |
| Trinidad and Tobago | 1996 | 0.630826 | 0.534858 |
| Trinidad and Tobago | 1997 | 0.670581 | 0.56774  |
| Trinidad and Tobago | 1998 | 0.668419 | 0.570753 |
| Trinidad and Tobago | 1999 | 0.693004 | 0.596655 |
| Trinidad and Tobago | 2000 | 0.721773 | 0.621557 |
| Trinidad and Tobago | 2001 | 0.707633 | 0.612719 |
| Trinidad and Tobago | 2002 | 0.708067 | 0.617553 |
| Trinidad and Tobago | 2003 | 0.702159 | 0.617369 |
| Trinidad and Tobago | 2004 | 0.719421 | 0.631428 |
| Trinidad and Tobago | 2005 | 0.697426 | 0.612803 |
| Trinidad and Tobago | 2006 | 0.752942 | 0.660694 |
| Trinidad and Tobago | 2007 | 0.769876 | 0.675302 |
| Trinidad and Tobago | 2008 | 0.726015 | 0.637953 |
| Trinidad and Tobago | 2009 | 0.751312 | 0.6574   |
| Trinidad and Tobago | 2010 | 0.747563 | 0.654669 |
| Trinidad and Tobago | 2011 | 0.748961 | 0.657407 |
| Trinidad and Tobago | 2012 | 0.758825 | 0.666719 |
| Trinidad and Tobago | 2013 | 0.75465  | 0.661016 |
| Trinidad and Tobago | 2014 | 0.74257  | 0.650544 |
| Trinidad and Tobago | 2015 | 0.728443 | 0.637884 |

|                     |      |          |          |
|---------------------|------|----------|----------|
| Trinidad and Tobago | 2016 | 0.714285 | 0.622822 |
| Trinidad and Tobago | 2017 | 0.708588 | 0.617215 |
| Trinidad and Tobago | 2018 | 0.705777 | 0.614191 |
| Trinidad and Tobago | 2019 | 0.700642 | 0.609275 |
| Tunisia             | 1990 | 0.922362 | 0.92216  |
| Tunisia             | 1991 | 0.91466  | 0.908992 |
| Tunisia             | 1992 | 0.909486 | 0.907232 |
| Tunisia             | 1993 | 0.893286 | 0.890379 |
| Tunisia             | 1994 | 0.889422 | 0.885243 |
| Tunisia             | 1995 | 0.915137 | 0.907174 |
| Tunisia             | 1996 | 0.915833 | 0.904284 |
| Tunisia             | 1997 | 0.911858 | 0.905111 |
| Tunisia             | 1998 | 0.906945 | 0.898084 |
| Tunisia             | 1999 | 0.902886 | 0.889968 |
| Tunisia             | 2000 | 0.895207 | 0.874845 |
| Tunisia             | 2001 | 0.896714 | 0.870498 |
| Tunisia             | 2002 | 0.901627 | 0.869276 |
| Tunisia             | 2003 | 0.896903 | 0.853638 |
| Tunisia             | 2004 | 0.907776 | 0.856652 |
| Tunisia             | 2005 | 0.920709 | 0.861737 |
| Tunisia             | 2006 | 0.929556 | 0.86298  |
| Tunisia             | 2007 | 0.942838 | 0.870231 |
| Tunisia             | 2008 | 0.955568 | 0.877671 |
| Tunisia             | 2009 | 0.960409 | 0.877045 |
| Tunisia             | 2010 | 0.968509 | 0.879379 |

|    |         |      |          |          |
|----|---------|------|----------|----------|
| 1  |         |      |          |          |
| 2  |         |      |          |          |
| 3  |         |      |          |          |
| 4  |         |      |          |          |
| 5  | Tunisia | 2011 | 0.982912 | 0.888732 |
| 6  | Tunisia | 2012 | 0.990537 | 0.890952 |
| 7  | Tunisia | 2013 | 1.002731 | 0.897425 |
| 8  | Tunisia | 2014 | 1.014181 | 0.903306 |
| 9  | Tunisia | 2015 | 1.026315 | 0.91006  |
| 10 | Tunisia | 2016 | 1.03649  | 0.914533 |
| 11 | Tunisia | 2017 | 1.04578  | 0.918231 |
| 12 | Tunisia | 2018 | 1.05692  | 0.925188 |
| 13 | Tunisia | 2019 | 1.070279 | 0.935564 |
| 14 | Turkey  | 1990 | 0.882338 | 0.747628 |
| 15 | Turkey  | 1991 | 0.923351 | 0.791123 |
| 16 | Turkey  | 1992 | 0.923977 | 0.795548 |
| 17 | Turkey  | 1993 | 0.926172 | 0.800107 |
| 18 | Turkey  | 1994 | 0.950114 | 0.827933 |
| 19 | Turkey  | 1995 | 0.9474   | 0.825339 |
| 20 | Turkey  | 1996 | 0.922129 | 0.799142 |
| 21 | Turkey  | 1997 | 0.877222 | 0.74673  |
| 22 | Turkey  | 1998 | 0.865027 | 0.727694 |
| 23 | Turkey  | 1999 | 0.904444 | 0.768061 |
| 24 | Turkey  | 2000 | 0.915587 | 0.780539 |
| 25 | Turkey  | 2001 | 0.842519 | 0.690307 |
| 26 | Turkey  | 2002 | 0.776753 | 0.607787 |
| 27 | Turkey  | 2003 | 0.77808  | 0.597431 |
| 28 | Turkey  | 2004 | 0.785448 | 0.592462 |
| 29 | Turkey  | 2005 | 0.826471 | 0.620965 |
| 30 |         |      |          |          |
| 31 |         |      |          |          |
| 32 |         |      |          |          |
| 33 |         |      |          |          |
| 34 |         |      |          |          |
| 35 |         |      |          |          |
| 36 |         |      |          |          |
| 37 |         |      |          |          |
| 38 |         |      |          |          |
| 39 |         |      |          |          |
| 40 |         |      |          |          |
| 41 |         |      |          |          |
| 42 |         |      |          |          |
| 43 |         |      |          |          |
| 44 |         |      |          |          |
| 45 |         |      |          |          |
| 46 |         |      |          |          |

|              |      |          |          |
|--------------|------|----------|----------|
| Turkey       | 2006 | 0.899691 | 0.676278 |
| Turkey       | 2007 | 0.989343 | 0.75242  |
| Turkey       | 2008 | 1.072288 | 0.831128 |
| Turkey       | 2009 | 1.07198  | 0.851161 |
| Turkey       | 2010 | 1.058503 | 0.849826 |
| Turkey       | 2011 | 1.045949 | 0.845235 |
| Turkey       | 2012 | 1.043623 | 0.847286 |
| Turkey       | 2013 | 1.048438 | 0.855723 |
| Turkey       | 2014 | 1.041235 | 0.848401 |
| Turkey       | 2015 | 1.054692 | 0.857405 |
| Turkey       | 2016 | 1.081499 | 0.880422 |
| Turkey       | 2017 | 1.101105 | 0.900345 |
| Turkey       | 2018 | 1.116604 | 0.915779 |
| Turkey       | 2019 | 1.122    | 0.920632 |
| Turkmenistan | 1990 | 1.024385 | 0.767814 |
| Turkmenistan | 1991 | 1.045253 | 0.777121 |
| Turkmenistan | 1992 | 1.073674 | 0.808289 |
| Turkmenistan | 1993 | 1.021469 | 0.770932 |
| Turkmenistan | 1994 | 0.985844 | 0.746882 |
| Turkmenistan | 1995 | 0.97205  | 0.741217 |
| Turkmenistan | 1996 | 0.92706  | 0.713066 |
| Turkmenistan | 1997 | 0.900121 | 0.699398 |
| Turkmenistan | 1998 | 0.849848 | 0.6639   |
| Turkmenistan | 1999 | 0.840053 | 0.656002 |
| Turkmenistan | 2000 | 0.836794 | 0.655332 |

1  
2  
3  
4  
5  
6  
7  
8  
9  
10  
11  
12  
13  
14  
15  
16  
17  
18  
19  
20  
21  
22  
23  
24  
25  
26  
27  
28  
29  
30  
31  
32  
33  
34  
35  
36  
37  
38  
39  
40  
41  
42  
43  
44  
45  
46

|              |      |          |          |
|--------------|------|----------|----------|
| Turkmenistan | 2001 | 0.85116  | 0.669704 |
| Turkmenistan | 2002 | 0.841139 | 0.66648  |
| Turkmenistan | 2003 | 0.803498 | 0.640381 |
| Turkmenistan | 2004 | 0.779975 | 0.625078 |
| Turkmenistan | 2005 | 0.77615  | 0.626214 |
| Turkmenistan | 2006 | 0.78764  | 0.638138 |
| Turkmenistan | 2007 | 0.762627 | 0.622647 |
| Turkmenistan | 2008 | 0.768426 | 0.627439 |
| Turkmenistan | 2009 | 0.78346  | 0.63939  |
| Turkmenistan | 2010 | 0.784212 | 0.642602 |
| Turkmenistan | 2011 | 0.800166 | 0.659001 |
| Turkmenistan | 2012 | 0.804281 | 0.665747 |
| Turkmenistan | 2013 | 0.75502  | 0.629872 |
| Turkmenistan | 2014 | 0.730527 | 0.612734 |
| Turkmenistan | 2015 | 0.700143 | 0.590465 |
| Turkmenistan | 2016 | 0.706254 | 0.596266 |
| Turkmenistan | 2017 | 0.704075 | 0.595532 |
| Turkmenistan | 2018 | 0.696381 | 0.58806  |
| Turkmenistan | 2019 | 0.694862 | 0.587712 |
| Tuvalu       | 1990 | 1.28414  | 0.882899 |
| Tuvalu       | 1991 | 1.271231 | 0.881089 |
| Tuvalu       | 1992 | 1.266315 | 0.883443 |
| Tuvalu       | 1993 | 1.277371 | 0.895488 |
| Tuvalu       | 1994 | 1.270392 | 0.895911 |
| Tuvalu       | 1995 | 1.282723 | 0.910113 |

|        |      |          |          |
|--------|------|----------|----------|
| Tuvalu | 1996 | 1.28478  | 0.918413 |
| Tuvalu | 1997 | 1.283959 | 0.924284 |
| Tuvalu | 1998 | 1.26629  | 0.918439 |
| Tuvalu | 1999 | 1.265058 | 0.923673 |
| Tuvalu | 2000 | 1.27034  | 0.933788 |
| Tuvalu | 2001 | 1.248973 | 0.927207 |
| Tuvalu | 2002 | 1.230434 | 0.923587 |
| Tuvalu | 2003 | 1.209399 | 0.917821 |
| Tuvalu | 2004 | 1.19759  | 0.918897 |
| Tuvalu | 2005 | 1.160623 | 0.900505 |
| Tuvalu | 2006 | 1.128669 | 0.885957 |
| Tuvalu | 2007 | 1.088976 | 0.86284  |
| Tuvalu | 2008 | 1.055329 | 0.843309 |
| Tuvalu | 2009 | 1.029277 | 0.829027 |
| Tuvalu | 2010 | 1.0103   | 0.819353 |
| Tuvalu | 2011 | 0.990434 | 0.809332 |
| Tuvalu | 2012 | 0.972895 | 0.800738 |
| Tuvalu | 2013 | 0.958254 | 0.793897 |
| Tuvalu | 2014 | 0.943162 | 0.785966 |
| Tuvalu | 2015 | 0.932401 | 0.780965 |
| Tuvalu | 2016 | 0.922036 | 0.777291 |
| Tuvalu | 2017 | 0.917452 | 0.777446 |
| Tuvalu | 2018 | 0.911409 | 0.776202 |
| Tuvalu | 2019 | 0.904083 | 0.774402 |
| Uganda | 1990 | 0.548236 | 0.504404 |

|        |      |          |          |
|--------|------|----------|----------|
| Uganda | 1991 | 0.54013  | 0.490464 |
| Uganda | 1992 | 0.536199 | 0.480626 |
| Uganda | 1993 | 0.535278 | 0.47393  |
| Uganda | 1994 | 0.53796  | 0.471558 |
| Uganda | 1995 | 0.539955 | 0.468542 |
| Uganda | 1996 | 0.54526  | 0.469057 |
| Uganda | 1997 | 0.557288 | 0.474044 |
| Uganda | 1998 | 0.574814 | 0.482678 |
| Uganda | 1999 | 0.592851 | 0.492126 |
| Uganda | 2000 | 0.61163  | 0.502468 |
| Uganda | 2001 | 0.625378 | 0.50938  |
| Uganda | 2002 | 0.635621 | 0.514315 |
| Uganda | 2003 | 0.640481 | 0.516736 |
| Uganda | 2004 | 0.646589 | 0.518975 |
| Uganda | 2005 | 0.650511 | 0.520499 |
| Uganda | 2006 | 0.647978 | 0.517671 |
| Uganda | 2007 | 0.639278 | 0.511191 |
| Uganda | 2008 | 0.630149 | 0.504185 |
| Uganda | 2009 | 0.628857 | 0.503771 |
| Uganda | 2010 | 0.634139 | 0.506062 |
| Uganda | 2011 | 0.637465 | 0.508293 |
| Uganda | 2012 | 0.645277 | 0.514361 |
| Uganda | 2013 | 0.659301 | 0.522239 |
| Uganda | 2014 | 0.668866 | 0.527592 |
| Uganda | 2015 | 0.675581 | 0.531943 |

|         |      |          |          |
|---------|------|----------|----------|
| Uganda  | 2016 | 0.680967 | 0.534655 |
| Uganda  | 2017 | 0.68842  | 0.542143 |
| Uganda  | 2018 | 0.697821 | 0.550123 |
| Uganda  | 2019 | 0.70498  | 0.556486 |
| Ukraine | 1990 | 1.26884  | 0.535379 |
| Ukraine | 1991 | 1.265186 | 0.53084  |
| Ukraine | 1992 | 1.259455 | 0.527745 |
| Ukraine | 1993 | 1.283322 | 0.535352 |
| Ukraine | 1994 | 1.266652 | 0.530396 |
| Ukraine | 1995 | 1.223648 | 0.518507 |
| Ukraine | 1996 | 1.228618 | 0.517985 |
| Ukraine | 1997 | 1.257429 | 0.526083 |
| Ukraine | 1998 | 1.284121 | 0.532463 |
| Ukraine | 1999 | 1.261957 | 0.528379 |
| Ukraine | 2000 | 1.222739 | 0.518315 |
| Ukraine | 2001 | 1.218068 | 0.524698 |
| Ukraine | 2002 | 1.187573 | 0.52938  |
| Ukraine | 2003 | 1.17885  | 0.542352 |
| Ukraine | 2004 | 1.125673 | 0.539554 |
| Ukraine | 2005 | 1.059571 | 0.529521 |
| Ukraine | 2006 | 1.058946 | 0.534629 |
| Ukraine | 2007 | 1.027918 | 0.531838 |
| Ukraine | 2008 | 1.014702 | 0.529647 |
| Ukraine | 2009 | 1.082432 | 0.551625 |
| Ukraine | 2010 | 1.100984 | 0.556521 |



1  
2  
3  
4  
5  
6  
7  
8  
9  
10  
11  
12  
13  
14  
15  
16  
17  
18  
19  
20  
21  
22  
23  
24  
25  
26  
27  
28  
29  
30  
31  
32  
33  
34  
35  
36  
37  
38  
39  
40  
41  
42  
43  
44  
45  
46

|                      |      |          |          |
|----------------------|------|----------|----------|
| Ukraine              | 2011 | 1.11073  | 0.562062 |
| Ukraine              | 2012 | 1.116488 | 0.569273 |
| Ukraine              | 2013 | 1.124589 | 0.579758 |
| Ukraine              | 2014 | 1.152312 | 0.594726 |
| Ukraine              | 2015 | 1.004352 | 0.550619 |
| Ukraine              | 2016 | 1.038161 | 0.568166 |
| Ukraine              | 2017 | 1.040673 | 0.563753 |
| Ukraine              | 2018 | 1.031214 | 0.550653 |
| Ukraine              | 2019 | 1.034153 | 0.548031 |
| United Arab Emirates | 1990 | 0.508775 | 1.055819 |
| United Arab Emirates | 1991 | 0.503032 | 1.069792 |
| United Arab Emirates | 1992 | 0.488118 | 1.067824 |
| United Arab Emirates | 1993 | 0.474784 | 1.069098 |
| United Arab Emirates | 1994 | 0.469924 | 1.103837 |
| United Arab Emirates | 1995 | 0.458375 | 1.106888 |
| United Arab Emirates | 1996 | 0.453324 | 1.114917 |
| United Arab Emirates | 1997 | 0.449076 | 1.143774 |
| United Arab Emirates | 1998 | 0.443761 | 1.145591 |
| United Arab Emirates | 1999 | 0.438082 | 1.140382 |
| United Arab Emirates | 2000 | 0.423761 | 1.063493 |
| United Arab Emirates | 2001 | 0.423709 | 1.065669 |
| United Arab Emirates | 2002 | 0.421871 | 1.066846 |
| United Arab Emirates | 2003 | 0.469095 | 1.226409 |
| United Arab Emirates | 2004 | 0.51104  | 1.461019 |
| United Arab Emirates | 2005 | 0.502397 | 1.530846 |

|                      |      |          |          |
|----------------------|------|----------|----------|
| United Arab Emirates | 2006 | 0.484336 | 1.642268 |
| United Arab Emirates | 2007 | 0.455707 | 1.872718 |
| United Arab Emirates | 2008 | 0.414353 | 1.915966 |
| United Arab Emirates | 2009 | 0.386944 | 1.959882 |
| United Arab Emirates | 2010 | 0.377203 | 1.975313 |
| United Arab Emirates | 2011 | 0.372044 | 2.007443 |
| United Arab Emirates | 2012 | 0.369703 | 2.035482 |
| United Arab Emirates | 2013 | 0.353789 | 1.824708 |
| United Arab Emirates | 2014 | 0.302003 | 1.068639 |
| United Arab Emirates | 2015 | 0.308823 | 1.083892 |
| United Arab Emirates | 2016 | 0.313736 | 1.095106 |
| United Arab Emirates | 2017 | 0.317355 | 1.102036 |
| United Arab Emirates | 2018 | 0.322685 | 1.113433 |
| United Arab Emirates | 2019 | 0.328024 | 1.123091 |
| United Kingdom       | 1990 | 1.193318 | 0.623683 |
| United Kingdom       | 1991 | 1.185042 | 0.617732 |
| United Kingdom       | 1992 | 1.191903 | 0.620316 |
| United Kingdom       | 1993 | 1.18015  | 0.616627 |
| United Kingdom       | 1994 | 1.184645 | 0.623098 |
| United Kingdom       | 1995 | 1.165368 | 0.618961 |
| United Kingdom       | 1996 | 1.162815 | 0.622685 |
| United Kingdom       | 1997 | 1.162376 | 0.626324 |
| United Kingdom       | 1998 | 1.151615 | 0.626223 |
| United Kingdom       | 1999 | 1.132918 | 0.618551 |
| United Kingdom       | 2000 | 1.133772 | 0.621896 |

|                             |      |          |          |
|-----------------------------|------|----------|----------|
| United Kingdom              | 2001 | 1.125533 | 0.620902 |
| United Kingdom              | 2002 | 1.116016 | 0.619005 |
| United Kingdom              | 2003 | 1.130571 | 0.631655 |
| United Kingdom              | 2004 | 1.141036 | 0.64618  |
| United Kingdom              | 2005 | 1.149652 | 0.659761 |
| United Kingdom              | 2006 | 1.140951 | 0.661428 |
| United Kingdom              | 2007 | 1.151446 | 0.673374 |
| United Kingdom              | 2008 | 1.158662 | 0.683882 |
| United Kingdom              | 2009 | 1.170397 | 0.694055 |
| United Kingdom              | 2010 | 1.196585 | 0.709307 |
| United Kingdom              | 2011 | 1.225876 | 0.723568 |
| United Kingdom              | 2012 | 1.252109 | 0.736999 |
| United Kingdom              | 2013 | 1.261349 | 0.746707 |
| United Kingdom              | 2014 | 1.272174 | 0.763126 |
| United Kingdom              | 2015 | 1.2565   | 0.769459 |
| United Kingdom              | 2016 | 1.240504 | 0.775236 |
| United Kingdom              | 2017 | 1.21352  | 0.77185  |
| United Kingdom              | 2018 | 1.186146 | 0.766796 |
| United Kingdom              | 2019 | 1.164712 | 0.764333 |
| United Republic of Tanzania | 1990 | 0.781522 | 0.703391 |
| United Republic of Tanzania | 1991 | 0.770668 | 0.692076 |
| United Republic of Tanzania | 1992 | 0.762312 | 0.682524 |
| United Republic of Tanzania | 1993 | 0.757432 | 0.675606 |
| United Republic of Tanzania | 1994 | 0.754777 | 0.669585 |
| United Republic of Tanzania | 1995 | 0.754556 | 0.665336 |

|                             |      |          |          |
|-----------------------------|------|----------|----------|
| United Republic of Tanzania | 1996 | 0.753179 | 0.660656 |
| United Republic of Tanzania | 1997 | 0.755772 | 0.65939  |
| United Republic of Tanzania | 1998 | 0.762045 | 0.661406 |
| United Republic of Tanzania | 1999 | 0.758868 | 0.656168 |
| United Republic of Tanzania | 2000 | 0.75477  | 0.650069 |
| United Republic of Tanzania | 2001 | 0.761333 | 0.652433 |
| United Republic of Tanzania | 2002 | 0.775263 | 0.660039 |
| United Republic of Tanzania | 2003 | 0.799231 | 0.675537 |
| United Republic of Tanzania | 2004 | 0.817084 | 0.687831 |
| United Republic of Tanzania | 2005 | 0.833331 | 0.699574 |
| United Republic of Tanzania | 2006 | 0.849816 | 0.70961  |
| United Republic of Tanzania | 2007 | 0.863137 | 0.718822 |
| United Republic of Tanzania | 2008 | 0.871853 | 0.726302 |
| United Republic of Tanzania | 2009 | 0.88892  | 0.738823 |
| United Republic of Tanzania | 2010 | 0.911233 | 0.758888 |
| United Republic of Tanzania | 2011 | 0.934464 | 0.780506 |
| United Republic of Tanzania | 2012 | 0.944435 | 0.790545 |
| United Republic of Tanzania | 2013 | 0.95813  | 0.803793 |
| United Republic of Tanzania | 2014 | 0.961943 | 0.812238 |
| United Republic of Tanzania | 2015 | 0.967976 | 0.817986 |
| United Republic of Tanzania | 2016 | 0.970737 | 0.825863 |
| United Republic of Tanzania | 2017 | 0.976471 | 0.836559 |
| United Republic of Tanzania | 2018 | 0.97822  | 0.842363 |
| United Republic of Tanzania | 2019 | 0.979223 | 0.848354 |
| United States of America    | 1990 | 1.121959 | 0.673713 |

1  
2  
3  
4  
5  
6  
7  
8  
9  
10  
11  
12  
13  
14  
15  
16  
17  
18  
19  
20  
21  
22  
23  
24  
25  
26  
27  
28  
29  
30  
31  
32  
33  
34  
35  
36  
37  
38  
39  
40  
41  
42  
43  
44  
45  
46

|                          |      |          |          |
|--------------------------|------|----------|----------|
| United States of America | 1991 | 1.121152 | 0.673792 |
| United States of America | 1992 | 1.118823 | 0.672728 |
| United States of America | 1993 | 1.117914 | 0.672485 |
| United States of America | 1994 | 1.127135 | 0.678043 |
| United States of America | 1995 | 1.130951 | 0.681682 |
| United States of America | 1996 | 1.147801 | 0.692919 |
| United States of America | 1997 | 1.160897 | 0.703666 |
| United States of America | 1998 | 1.167934 | 0.711278 |
| United States of America | 1999 | 1.175995 | 0.721325 |
| United States of America | 2000 | 1.185469 | 0.731829 |
| United States of America | 2001 | 1.184596 | 0.736947 |
| United States of America | 2002 | 1.166022 | 0.730166 |
| United States of America | 2003 | 1.156228 | 0.729609 |
| United States of America | 2004 | 1.162079 | 0.737919 |
| United States of America | 2005 | 1.161446 | 0.741989 |
| United States of America | 2006 | 1.170441 | 0.752624 |
| United States of America | 2007 | 1.176848 | 0.761583 |
| United States of America | 2008 | 1.157902 | 0.754912 |
| United States of America | 2009 | 1.137414 | 0.747998 |
| United States of America | 2010 | 1.112516 | 0.737069 |
| United States of America | 2011 | 1.100105 | 0.735527 |
| United States of America | 2012 | 1.079197 | 0.728297 |
| United States of America | 2013 | 1.052712 | 0.717797 |
| United States of America | 2014 | 1.045775 | 0.71982  |
| United States of America | 2015 | 1.036761 | 0.720233 |

|                              |      |          |          |
|------------------------------|------|----------|----------|
| United States of America     | 2016 | 1.018288 | 0.714376 |
| United States of America     | 2017 | 0.997852 | 0.705882 |
| United States of America     | 2018 | 0.970738 | 0.689814 |
| United States of America     | 2019 | 0.99178  | 0.704414 |
| United States Virgin Islands | 1990 | 0.873088 | 0.721712 |
| United States Virgin Islands | 1991 | 0.874237 | 0.725185 |
| United States Virgin Islands | 1992 | 0.870862 | 0.721844 |
| United States Virgin Islands | 1993 | 0.870139 | 0.720392 |
| United States Virgin Islands | 1994 | 0.875963 | 0.723101 |
| United States Virgin Islands | 1995 | 0.910227 | 0.749649 |
| United States Virgin Islands | 1996 | 0.91449  | 0.749982 |
| United States Virgin Islands | 1997 | 0.925431 | 0.756183 |
| United States Virgin Islands | 1998 | 0.934782 | 0.760012 |
| United States Virgin Islands | 1999 | 0.930633 | 0.751762 |
| United States Virgin Islands | 2000 | 0.956607 | 0.762725 |
| United States Virgin Islands | 2001 | 0.955895 | 0.760227 |
| United States Virgin Islands | 2002 | 0.959703 | 0.761204 |
| United States Virgin Islands | 2003 | 0.960362 | 0.761988 |
| United States Virgin Islands | 2004 | 0.96685  | 0.766782 |
| United States Virgin Islands | 2005 | 0.964826 | 0.766372 |
| United States Virgin Islands | 2006 | 0.926507 | 0.744328 |
| United States Virgin Islands | 2007 | 0.733662 | 0.621569 |
| United States Virgin Islands | 2008 | 0.734813 | 0.619853 |
| United States Virgin Islands | 2009 | 0.740848 | 0.622809 |
| United States Virgin Islands | 2010 | 0.746643 | 0.624255 |

1  
2  
3  
4  
5  
6  
7  
8  
9  
10  
11  
12  
13  
14  
15  
16  
17  
18  
19  
20  
21  
22  
23  
24  
25  
26  
27  
28  
29  
30  
31  
32  
33  
34  
35  
36  
37  
38  
39  
40  
41  
42  
43  
44  
45  
46

|                              |      |          |          |
|------------------------------|------|----------|----------|
| United States Virgin Islands | 2011 | 0.748312 | 0.62212  |
| United States Virgin Islands | 2012 | 0.74953  | 0.619269 |
| United States Virgin Islands | 2013 | 0.748915 | 0.614179 |
| United States Virgin Islands | 2014 | 0.746855 | 0.60744  |
| United States Virgin Islands | 2015 | 0.742282 | 0.598189 |
| United States Virgin Islands | 2016 | 0.742383 | 0.591309 |
| United States Virgin Islands | 2017 | 0.750479 | 0.590251 |
| United States Virgin Islands | 2018 | 0.761021 | 0.590597 |
| United States Virgin Islands | 2019 | 0.771097 | 0.590125 |
| Uruguay                      | 1990 | 0.787892 | 0.531212 |
| Uruguay                      | 1991 | 0.815435 | 0.545513 |
| Uruguay                      | 1992 | 0.792603 | 0.529812 |
| Uruguay                      | 1993 | 0.792372 | 0.527085 |
| Uruguay                      | 1994 | 0.782112 | 0.517604 |
| Uruguay                      | 1995 | 0.776781 | 0.509406 |
| Uruguay                      | 1996 | 0.77837  | 0.508201 |
| Uruguay                      | 1997 | 0.800527 | 0.519526 |
| Uruguay                      | 1998 | 0.786886 | 0.508517 |
| Uruguay                      | 1999 | 0.810708 | 0.520204 |
| Uruguay                      | 2000 | 0.821543 | 0.525213 |
| Uruguay                      | 2001 | 0.846287 | 0.538567 |
| Uruguay                      | 2002 | 0.836056 | 0.528477 |
| Uruguay                      | 2003 | 0.864479 | 0.540434 |
| Uruguay                      | 2004 | 0.894154 | 0.553194 |
| Uruguay                      | 2005 | 0.908873 | 0.560506 |

|            |      |          |          |
|------------|------|----------|----------|
| Uruguay    | 2006 | 0.913924 | 0.560684 |
| Uruguay    | 2007 | 0.904512 | 0.551885 |
| Uruguay    | 2008 | 0.924715 | 0.562482 |
| Uruguay    | 2009 | 0.912966 | 0.55148  |
| Uruguay    | 2010 | 0.93959  | 0.561935 |
| Uruguay    | 2011 | 0.962523 | 0.566127 |
| Uruguay    | 2012 | 0.976484 | 0.571097 |
| Uruguay    | 2013 | 0.988945 | 0.57691  |
| Uruguay    | 2014 | 0.996598 | 0.579124 |
| Uruguay    | 2015 | 1.013463 | 0.586803 |
| Uruguay    | 2016 | 1.039523 | 0.59868  |
| Uruguay    | 2017 | 1.031497 | 0.593876 |
| Uruguay    | 2018 | 1.024607 | 0.589103 |
| Uruguay    | 2019 | 1.020814 | 0.586969 |
| Uzbekistan | 1990 | 1.053712 | 0.850642 |
| Uzbekistan | 1991 | 1.058001 | 0.854141 |
| Uzbekistan | 1992 | 1.078785 | 0.8679   |
| Uzbekistan | 1993 | 1.066371 | 0.853702 |
| Uzbekistan | 1994 | 1.030576 | 0.826133 |
| Uzbekistan | 1995 | 0.981071 | 0.793016 |
| Uzbekistan | 1996 | 0.943412 | 0.769216 |
| Uzbekistan | 1997 | 0.952693 | 0.779594 |
| Uzbekistan | 1998 | 0.966792 | 0.790835 |
| Uzbekistan | 1999 | 0.943803 | 0.773295 |
| Uzbekistan | 2000 | 0.917629 | 0.749618 |



1  
2  
3  
4  
5  
6  
7  
8  
9  
10  
11  
12  
13  
14  
15  
16  
17  
18  
19  
20  
21  
22  
23  
24  
25  
26  
27  
28  
29  
30  
31  
32  
33  
34  
35  
36  
37  
38  
39  
40  
41  
42  
43  
44  
45  
46

|            |      |          |          |
|------------|------|----------|----------|
| Uzbekistan | 2001 | 0.899862 | 0.73214  |
| Uzbekistan | 2002 | 0.894435 | 0.723247 |
| Uzbekistan | 2003 | 0.892522 | 0.716783 |
| Uzbekistan | 2004 | 0.89648  | 0.716733 |
| Uzbekistan | 2005 | 0.897849 | 0.728357 |
| Uzbekistan | 2006 | 0.887354 | 0.723319 |
| Uzbekistan | 2007 | 0.879009 | 0.725456 |
| Uzbekistan | 2008 | 0.868701 | 0.718806 |
| Uzbekistan | 2009 | 0.865821 | 0.718362 |
| Uzbekistan | 2010 | 0.876619 | 0.731268 |
| Uzbekistan | 2011 | 0.865302 | 0.727632 |
| Uzbekistan | 2012 | 0.862568 | 0.731741 |
| Uzbekistan | 2013 | 0.856119 | 0.730918 |
| Uzbekistan | 2014 | 0.845965 | 0.724626 |
| Uzbekistan | 2015 | 0.845181 | 0.726931 |
| Uzbekistan | 2016 | 0.839304 | 0.728291 |
| Uzbekistan | 2017 | 0.838265 | 0.723642 |
| Uzbekistan | 2018 | 0.835082 | 0.719203 |
| Uzbekistan | 2019 | 0.831718 | 0.71384  |
| Vanuatu    | 1990 | 0.924689 | 1.062804 |
| Vanuatu    | 1991 | 0.959062 | 1.090159 |
| Vanuatu    | 1992 | 0.992102 | 1.11732  |
| Vanuatu    | 1993 | 1.015954 | 1.136811 |
| Vanuatu    | 1994 | 1.050027 | 1.165347 |
| Vanuatu    | 1995 | 1.057606 | 1.170658 |

|    |                                    |      |          |          |
|----|------------------------------------|------|----------|----------|
| 1  |                                    |      |          |          |
| 2  |                                    |      |          |          |
| 3  |                                    |      |          |          |
| 4  |                                    |      |          |          |
| 5  | Vanuatu                            | 1996 | 1.075089 | 1.181653 |
| 6  | Vanuatu                            | 1997 | 1.081546 | 1.182417 |
| 7  | Vanuatu                            | 1998 | 1.087602 | 1.181903 |
| 8  | Vanuatu                            | 1999 | 1.083482 | 1.169205 |
| 9  | Vanuatu                            | 2000 | 1.055304 | 1.134576 |
| 10 | Vanuatu                            | 2001 | 1.03525  | 1.103403 |
| 11 | Vanuatu                            | 2002 | 0.979033 | 1.042508 |
| 12 | Vanuatu                            | 2003 | 0.939    | 0.996405 |
| 13 | Vanuatu                            | 2004 | 0.932133 | 0.979734 |
| 14 | Vanuatu                            | 2005 | 0.931551 | 0.967699 |
| 15 | Vanuatu                            | 2006 | 0.933997 | 0.962733 |
| 16 | Vanuatu                            | 2007 | 0.937084 | 0.957964 |
| 17 | Vanuatu                            | 2008 | 0.939521 | 0.955358 |
| 18 | Vanuatu                            | 2009 | 0.939143 | 0.952518 |
| 19 | Vanuatu                            | 2010 | 0.938401 | 0.95149  |
| 20 | Vanuatu                            | 2011 | 0.947135 | 0.960747 |
| 21 | Vanuatu                            | 2012 | 0.945052 | 0.960552 |
| 22 | Vanuatu                            | 2013 | 0.941907 | 0.960476 |
| 23 | Vanuatu                            | 2014 | 0.930911 | 0.952544 |
| 24 | Vanuatu                            | 2015 | 0.923052 | 0.947129 |
| 25 | Vanuatu                            | 2016 | 0.912979 | 0.93965  |
| 26 | Vanuatu                            | 2017 | 0.911947 | 0.940753 |
| 27 | Vanuatu                            | 2018 | 0.909456 | 0.940258 |
| 28 | Vanuatu                            | 2019 | 0.90635  | 0.939138 |
| 29 | Venezuela (Bolivarian Republic of) | 1990 | 0.816605 | 0.702689 |
| 30 |                                    |      |          |          |
| 31 |                                    |      |          |          |
| 32 |                                    |      |          |          |
| 33 |                                    |      |          |          |
| 34 |                                    |      |          |          |
| 35 |                                    |      |          |          |
| 36 |                                    |      |          |          |
| 37 |                                    |      |          |          |
| 38 |                                    |      |          |          |
| 39 |                                    |      |          |          |
| 40 |                                    |      |          |          |
| 41 |                                    |      |          |          |
| 42 |                                    |      |          |          |
| 43 |                                    |      |          |          |
| 44 |                                    |      |          |          |
| 45 |                                    |      |          |          |
| 46 |                                    |      |          |          |

|                                    |      |          |          |
|------------------------------------|------|----------|----------|
| Venezuela (Bolivarian Republic of) | 1991 | 0.804698 | 0.693203 |
| Venezuela (Bolivarian Republic of) | 1992 | 0.798843 | 0.686705 |
| Venezuela (Bolivarian Republic of) | 1993 | 0.757611 | 0.641868 |
| Venezuela (Bolivarian Republic of) | 1994 | 0.773954 | 0.64284  |
| Venezuela (Bolivarian Republic of) | 1995 | 0.78569  | 0.650344 |
| Venezuela (Bolivarian Republic of) | 1996 | 0.827465 | 0.689124 |
| Venezuela (Bolivarian Republic of) | 1997 | 0.859391 | 0.715852 |
| Venezuela (Bolivarian Republic of) | 1998 | 0.810625 | 0.676084 |
| Venezuela (Bolivarian Republic of) | 1999 | 0.831487 | 0.694345 |
| Venezuela (Bolivarian Republic of) | 2000 | 0.803139 | 0.671118 |
| Venezuela (Bolivarian Republic of) | 2001 | 0.799291 | 0.667806 |
| Venezuela (Bolivarian Republic of) | 2002 | 0.827619 | 0.684559 |
| Venezuela (Bolivarian Republic of) | 2003 | 0.765497 | 0.632291 |
| Venezuela (Bolivarian Republic of) | 2004 | 0.775109 | 0.637159 |
| Venezuela (Bolivarian Republic of) | 2005 | 0.759502 | 0.621158 |
| Venezuela (Bolivarian Republic of) | 2006 | 0.708105 | 0.576335 |
| Venezuela (Bolivarian Republic of) | 2007 | 0.670884 | 0.544186 |
| Venezuela (Bolivarian Republic of) | 2008 | 0.667097 | 0.540119 |
| Venezuela (Bolivarian Republic of) | 2009 | 0.678994 | 0.548394 |
| Venezuela (Bolivarian Republic of) | 2010 | 0.768656 | 0.622094 |
| Venezuela (Bolivarian Republic of) | 2011 | 0.78214  | 0.635776 |
| Venezuela (Bolivarian Republic of) | 2012 | 0.752834 | 0.615282 |
| Venezuela (Bolivarian Republic of) | 2013 | 0.769992 | 0.630856 |
| Venezuela (Bolivarian Republic of) | 2014 | 0.884428 | 0.726306 |
| Venezuela (Bolivarian Republic of) | 2015 | 0.880047 | 0.72823  |

|                                    |      |          |          |
|------------------------------------|------|----------|----------|
| Venezuela (Bolivarian Republic of) | 2016 | 0.860449 | 0.71614  |
| Venezuela (Bolivarian Republic of) | 2017 | 0.828765 | 0.692569 |
| Venezuela (Bolivarian Republic of) | 2018 | 0.805853 | 0.675996 |
| Venezuela (Bolivarian Republic of) | 2019 | 0.785368 | 0.659536 |
| Viet Nam                           | 1990 | 1.930348 | 1.258255 |
| Viet Nam                           | 1991 | 1.895754 | 1.240529 |
| Viet Nam                           | 1992 | 1.868496 | 1.226206 |
| Viet Nam                           | 1993 | 1.841509 | 1.210638 |
| Viet Nam                           | 1994 | 1.813586 | 1.193323 |
| Viet Nam                           | 1995 | 1.782829 | 1.172882 |
| Viet Nam                           | 1996 | 1.743699 | 1.147006 |
| Viet Nam                           | 1997 | 1.709193 | 1.122924 |
| Viet Nam                           | 1998 | 1.672772 | 1.096766 |
| Viet Nam                           | 1999 | 1.63651  | 1.070041 |
| Viet Nam                           | 2000 | 1.579058 | 1.030261 |
| Viet Nam                           | 2001 | 1.521513 | 0.993379 |
| Viet Nam                           | 2002 | 1.47358  | 0.962    |
| Viet Nam                           | 2003 | 1.431813 | 0.932566 |
| Viet Nam                           | 2004 | 1.392316 | 0.903543 |
| Viet Nam                           | 2005 | 1.353006 | 0.874162 |
| Viet Nam                           | 2006 | 1.337065 | 0.859607 |
| Viet Nam                           | 2007 | 1.324604 | 0.850056 |
| Viet Nam                           | 2008 | 1.323289 | 0.849737 |
| Viet Nam                           | 2009 | 1.321261 | 0.852674 |
| Viet Nam                           | 2010 | 1.328771 | 0.860246 |

1  
2  
3  
4  
5  
6  
7  
8  
9  
10  
11  
12  
13  
14  
15  
16  
17  
18  
19  
20  
21  
22  
23  
24  
25  
26  
27  
28  
29  
30  
31  
32  
33  
34  
35  
36  
37  
38  
39  
40  
41  
42  
43  
44  
45  
46

|          |      |          |          |
|----------|------|----------|----------|
| Viet Nam | 2011 | 1.341013 | 0.87573  |
| Viet Nam | 2012 | 1.354551 | 0.89126  |
| Viet Nam | 2013 | 1.369053 | 0.906847 |
| Viet Nam | 2014 | 1.387531 | 0.923227 |
| Viet Nam | 2015 | 1.409908 | 0.938181 |
| Viet Nam | 2016 | 1.431575 | 0.953848 |
| Viet Nam | 2017 | 1.459148 | 0.972659 |
| Viet Nam | 2018 | 1.486234 | 0.990891 |
| Viet Nam | 2019 | 1.508687 | 1.006537 |
| Yemen    | 1990 | 0.981841 | 0.746822 |
| Yemen    | 1991 | 0.968788 | 0.745728 |
| Yemen    | 1992 | 0.950842 | 0.740663 |
| Yemen    | 1993 | 0.932491 | 0.735044 |
| Yemen    | 1994 | 0.913991 | 0.729153 |
| Yemen    | 1995 | 0.904266 | 0.730324 |
| Yemen    | 1996 | 0.896218 | 0.731679 |
| Yemen    | 1997 | 0.882889 | 0.728787 |
| Yemen    | 1998 | 0.870341 | 0.726354 |
| Yemen    | 1999 | 0.857908 | 0.723453 |
| Yemen    | 2000 | 0.847074 | 0.721681 |
| Yemen    | 2001 | 0.837908 | 0.720832 |
| Yemen    | 2002 | 0.832844 | 0.720939 |
| Yemen    | 2003 | 0.82958  | 0.723923 |
| Yemen    | 2004 | 0.828547 | 0.727283 |
| Yemen    | 2005 | 0.830121 | 0.733911 |

|        |      |          |          |
|--------|------|----------|----------|
| Yemen  | 2006 | 0.829255 | 0.735995 |
| Yemen  | 2007 | 0.83175  | 0.740204 |
| Yemen  | 2008 | 0.832213 | 0.742458 |
| Yemen  | 2009 | 0.832872 | 0.745576 |
| Yemen  | 2010 | 0.835204 | 0.752401 |
| Yemen  | 2011 | 0.845055 | 0.763452 |
| Yemen  | 2012 | 0.853337 | 0.773794 |
| Yemen  | 2013 | 0.862728 | 0.784063 |
| Yemen  | 2014 | 0.869438 | 0.792211 |
| Yemen  | 2015 | 0.873679 | 0.798236 |
| Yemen  | 2016 | 0.879447 | 0.80375  |
| Yemen  | 2017 | 0.885689 | 0.808814 |
| Yemen  | 2018 | 0.891526 | 0.812253 |
| Yemen  | 2019 | 0.897097 | 0.814499 |
| Zambia | 1990 | 0.874025 | 0.844793 |
| Zambia | 1991 | 0.860211 | 0.835418 |
| Zambia | 1992 | 0.844285 | 0.825868 |
| Zambia | 1993 | 0.821036 | 0.808517 |
| Zambia | 1994 | 0.809962 | 0.801534 |
| Zambia | 1995 | 0.79626  | 0.791593 |
| Zambia | 1996 | 0.782948 | 0.782316 |
| Zambia | 1997 | 0.766796 | 0.76913  |
| Zambia | 1998 | 0.750685 | 0.754682 |
| Zambia | 1999 | 0.732818 | 0.737519 |
| Zambia | 2000 | 0.707935 | 0.712561 |

|          |      |          |          |
|----------|------|----------|----------|
| Zambia   | 2001 | 0.693031 | 0.695964 |
| Zambia   | 2002 | 0.677749 | 0.678508 |
| Zambia   | 2003 | 0.667889 | 0.664051 |
| Zambia   | 2004 | 0.659869 | 0.648766 |
| Zambia   | 2005 | 0.655895 | 0.638442 |
| Zambia   | 2006 | 0.660793 | 0.637345 |
| Zambia   | 2007 | 0.659858 | 0.631617 |
| Zambia   | 2008 | 0.660439 | 0.627202 |
| Zambia   | 2009 | 0.667305 | 0.629889 |
| Zambia   | 2010 | 0.679315 | 0.637493 |
| Zambia   | 2011 | 0.69254  | 0.647015 |
| Zambia   | 2012 | 0.707016 | 0.658908 |
| Zambia   | 2013 | 0.720994 | 0.669655 |
| Zambia   | 2014 | 0.729531 | 0.67707  |
| Zambia   | 2015 | 0.735597 | 0.683088 |
| Zambia   | 2016 | 0.741109 | 0.689189 |
| Zambia   | 2017 | 0.749312 | 0.697265 |
| Zambia   | 2018 | 0.752969 | 0.70141  |
| Zambia   | 2019 | 0.759635 | 0.707038 |
| Zimbabwe | 1990 | 0.661655 | 0.555791 |
| Zimbabwe | 1991 | 0.640232 | 0.541326 |
| Zimbabwe | 1992 | 0.610999 | 0.522021 |
| Zimbabwe | 1993 | 0.567077 | 0.49111  |
| Zimbabwe | 1994 | 0.515934 | 0.449828 |
| Zimbabwe | 1995 | 0.461896 | 0.404784 |

|          |      |          |          |
|----------|------|----------|----------|
| Zimbabwe | 1996 | 0.418462 | 0.364105 |
| Zimbabwe | 1997 | 0.392742 | 0.335841 |
| Zimbabwe | 1998 | 0.414159 | 0.346022 |
| Zimbabwe | 1999 | 0.449094 | 0.366171 |
| Zimbabwe | 2000 | 0.487121 | 0.389527 |
| Zimbabwe | 2001 | 0.512585 | 0.40252  |
| Zimbabwe | 2002 | 0.54821  | 0.423934 |
| Zimbabwe | 2003 | 0.584949 | 0.445465 |
| Zimbabwe | 2004 | 0.618119 | 0.464381 |
| Zimbabwe | 2005 | 0.616168 | 0.459484 |
| Zimbabwe | 2006 | 0.640547 | 0.473186 |
| Zimbabwe | 2007 | 0.658688 | 0.483898 |
| Zimbabwe | 2008 | 0.694945 | 0.507221 |
| Zimbabwe | 2009 | 0.7293   | 0.52948  |
| Zimbabwe | 2010 | 0.733864 | 0.532571 |
| Zimbabwe | 2011 | 0.724001 | 0.525821 |
| Zimbabwe | 2012 | 0.727939 | 0.527944 |
| Zimbabwe | 2013 | 0.739323 | 0.534652 |
| Zimbabwe | 2014 | 0.759521 | 0.547145 |
| Zimbabwe | 2015 | 0.758458 | 0.546135 |
| Zimbabwe | 2016 | 0.756162 | 0.544612 |
| Zimbabwe | 2017 | 0.757829 | 0.544924 |
| Zimbabwe | 2018 | 0.757228 | 0.54387  |
| Zimbabwe | 2019 | 0.757349 | 0.543382 |



## STROBE Statement—checklist of items that should be included in reports of observational studies

|                              | Item No                                                                                                                                                                                                                                                                                                   | Recommendation                                                                                                                                                                                                                                                                                                                                                                                                                                                         | Page No |
|------------------------------|-----------------------------------------------------------------------------------------------------------------------------------------------------------------------------------------------------------------------------------------------------------------------------------------------------------|------------------------------------------------------------------------------------------------------------------------------------------------------------------------------------------------------------------------------------------------------------------------------------------------------------------------------------------------------------------------------------------------------------------------------------------------------------------------|---------|
| <b>Title and abstract</b>    | 1                                                                                                                                                                                                                                                                                                         | (a) Indicate the study's design with a commonly used term in the title or the abstract                                                                                                                                                                                                                                                                                                                                                                                 | 2       |
|                              |                                                                                                                                                                                                                                                                                                           | (b) Provide in the abstract an informative and balanced summary of what was done and what was found                                                                                                                                                                                                                                                                                                                                                                    | 2       |
| <b>Introduction</b>          |                                                                                                                                                                                                                                                                                                           |                                                                                                                                                                                                                                                                                                                                                                                                                                                                        |         |
| Background/rationale         | 2                                                                                                                                                                                                                                                                                                         | Explain the scientific background and rationale for the investigation being reported                                                                                                                                                                                                                                                                                                                                                                                   | 4       |
| Objectives                   | 3                                                                                                                                                                                                                                                                                                         | State specific objectives, including any prespecified hypotheses                                                                                                                                                                                                                                                                                                                                                                                                       | 4       |
| <b>Methods</b>               |                                                                                                                                                                                                                                                                                                           |                                                                                                                                                                                                                                                                                                                                                                                                                                                                        |         |
| Study design                 | 4                                                                                                                                                                                                                                                                                                         | Present key elements of study design early in the paper                                                                                                                                                                                                                                                                                                                                                                                                                | 4       |
| Setting                      | 5                                                                                                                                                                                                                                                                                                         | Describe the setting, locations, and relevant dates, including periods of recruitment, exposure, follow-up, and data collection                                                                                                                                                                                                                                                                                                                                        | 4       |
| Participants                 | 6                                                                                                                                                                                                                                                                                                         | (a) <i>Cohort study</i> —Give the eligibility criteria, and the sources and methods of selection of participants. Describe methods of follow-up<br><i>Case-control study</i> —Give the eligibility criteria, and the sources and methods of case ascertainment and control selection. Give the rationale for the choice of cases and controls<br><i>Cross-sectional study</i> —Give the eligibility criteria, and the sources and methods of selection of participants | 4       |
|                              |                                                                                                                                                                                                                                                                                                           | (b) <i>Cohort study</i> —For matched studies, give matching criteria and number of exposed and unexposed<br><i>Case-control study</i> —For matched studies, give matching criteria and the number of controls per case                                                                                                                                                                                                                                                 | NA      |
| Variables                    | 7                                                                                                                                                                                                                                                                                                         | Clearly define all outcomes, exposures, predictors, potential confounders, and effect modifiers. Give diagnostic criteria, if applicable                                                                                                                                                                                                                                                                                                                               | NA      |
| Data sources/<br>measurement | 8*                                                                                                                                                                                                                                                                                                        | For each variable of interest, give sources of data and details of methods of assessment (measurement). Describe comparability of assessment methods if there is more than one group                                                                                                                                                                                                                                                                                   | 4       |
| Bias                         | 9                                                                                                                                                                                                                                                                                                         | Describe any efforts to address potential sources of bias                                                                                                                                                                                                                                                                                                                                                                                                              | NA      |
| Study size                   | 10                                                                                                                                                                                                                                                                                                        | Explain how the study size was arrived at                                                                                                                                                                                                                                                                                                                                                                                                                              | NA      |
| Quantitative variables       | 11                                                                                                                                                                                                                                                                                                        | Explain how quantitative variables were handled in the analyses. If applicable, describe which groupings were chosen and why                                                                                                                                                                                                                                                                                                                                           | NA      |
| Statistical methods          | 12                                                                                                                                                                                                                                                                                                        | (a) Describe all statistical methods, including those used to control for confounding                                                                                                                                                                                                                                                                                                                                                                                  | 4, 5    |
|                              |                                                                                                                                                                                                                                                                                                           | (b) Describe any methods used to examine subgroups and interactions                                                                                                                                                                                                                                                                                                                                                                                                    | 4, 5    |
|                              | (c) Explain how missing data were addressed                                                                                                                                                                                                                                                               | NA                                                                                                                                                                                                                                                                                                                                                                                                                                                                     |         |
|                              | (d) <i>Cohort study</i> —If applicable, explain how loss to follow-up was addressed<br><i>Case-control study</i> —If applicable, explain how matching of cases and controls was addressed<br><i>Cross-sectional study</i> —If applicable, describe analytical methods taking account of sampling strategy | NA                                                                                                                                                                                                                                                                                                                                                                                                                                                                     |         |
|                              | (e) Describe any sensitivity analyses                                                                                                                                                                                                                                                                     | NA                                                                                                                                                                                                                                                                                                                                                                                                                                                                     |         |

Continued on next page

| <b>Results</b>           |     |                                                                                                                                                                                                              |      |
|--------------------------|-----|--------------------------------------------------------------------------------------------------------------------------------------------------------------------------------------------------------------|------|
| Participants             | 13* | (a) Report numbers of individuals at each stage of study—eg numbers potentially eligible, examined for eligibility, confirmed eligible, included in the study, completing follow-up, and analysed            | 5, 6 |
|                          |     | (b) Give reasons for non-participation at each stage                                                                                                                                                         | NA   |
|                          |     | (c) Consider use of a flow diagram                                                                                                                                                                           | NA   |
| Descriptive data         | 14* | (a) Give characteristics of study participants (eg demographic, clinical, social) and information on exposures and potential confounders                                                                     | 5, 6 |
|                          |     | (b) Indicate number of participants with missing data for each variable of interest                                                                                                                          | NA   |
|                          |     | (c) <i>Cohort study</i> —Summarise follow-up time (eg, average and total amount)                                                                                                                             | NA   |
| Outcome data             | 15* | <i>Cohort study</i> —Report numbers of outcome events or summary measures over time                                                                                                                          | 5    |
|                          |     | <i>Case-control study</i> —Report numbers in each exposure category, or summary measures of exposure                                                                                                         | NA   |
|                          |     | <i>Cross-sectional study</i> —Report numbers of outcome events or summary measures                                                                                                                           | NA   |
| Main results             | 16  | (a) Give unadjusted estimates and, if applicable, confounder-adjusted estimates and their precision (eg, 95% confidence interval). Make clear which confounders were adjusted for and why they were included | 5-8  |
|                          |     | (b) Report category boundaries when continuous variables were categorized                                                                                                                                    | NA   |
|                          |     | (c) If relevant, consider translating estimates of relative risk into absolute risk for a meaningful time period                                                                                             | NA   |
| Other analyses           | 17  | Report other analyses done—eg analyses of subgroups and interactions, and sensitivity analyses                                                                                                               | NA   |
| <b>Discussion</b>        |     |                                                                                                                                                                                                              |      |
| Key results              | 18  | Summarise key results with reference to study objectives                                                                                                                                                     | 5-8  |
| Limitations              | 19  | Discuss limitations of the study, taking into account sources of potential bias or imprecision. Discuss both direction and magnitude of any potential bias                                                   | 10   |
| Interpretation           | 20  | Give a cautious overall interpretation of results considering objectives, limitations, multiplicity of analyses, results from similar studies, and other relevant evidence                                   | 10   |
| Generalisability         | 21  | Discuss the generalisability (external validity) of the study results                                                                                                                                        | 8-10 |
| <b>Other information</b> |     |                                                                                                                                                                                                              |      |
| Funding                  | 22  | Give the source of funding and the role of the funders for the present study and, if applicable, for the original study on which the present article is based                                                | 11   |

\*Give information separately for cases and controls in case-control studies and, if applicable, for exposed and unexposed groups in cohort and cross-sectional studies.

**Note:** An Explanation and Elaboration article discusses each checklist item and gives methodological background and published examples of transparent reporting. The STROBE checklist is best used in conjunction with this article (freely available on the Web sites of PLoS Medicine at <http://www.plosmedicine.org/>, Annals of Internal Medicine at <http://www.annals.org/>, and Epidemiology at <http://www.epidem.com/>). Information on the STROBE Initiative is available at [www.strobe-statement.org](http://www.strobe-statement.org).
