# Supplementary material for: Secular trends of epidemiologic patterns of chronic kidney disease over three decades: an updated analysis of the Global Burden of Disease Study 2019
Source: PubMed Central journal article supplement — BMJ Open. 2023 Mar 17;13(3):e064540. doi: 10.1136/bmjopen-2022-064540 (PMC10030786; doi:10.1136/bmjopen-2022-064540), 2023-03-17
Supplement: bmjopen-2022-064540supp001.pdf [file bmjopen-2022-064540supp001.pdf]

# Global Death Burden of Chronic Kidney Disease from 1990 to 2019

**Supplemental figure 1. Numbers of prevalence, incidence and DALYs of CKD in global and SDI areas in 1990 and 2019. DALYs, disability-adjusted life years.**

**Supplemental figure 2. The rank change of death numbers, ASDR, ASPR, ASR-DALYs, ASR-YLLs and ASR- YLDs of CKD from 1990 to 2019. DALYs, disability-adjusted life years. YLLs, years of life lost prematurely. YLDs, years lived with disability. ASDR, age-standardized death rate (per 100,000 population). ASPR, age-standardized prevalence rate (per 100,000 population). ASR-DALYs, age-standardized DALYs rate (per 100,000 population). ASR-YLLs, age-standardized YLLs rate (per 100,000 population). ASR-YLDs, age-standardized YLDs rate (per 100,000 population).**

**Supplemental figure 3. Temporal trends of ASDR, ASIR, ASPR, ASR-DALYs, ASR-YLLs and ASR- YLDs of CKD by genders from 1990 to 2019. DALYs, disability-adjusted life years. YLLs, years of life lost prematurely. YLDs, years lived with disability. ASDR, age-standardized death rate (per 100,000 population). ASPR, age-standardized prevalence rate (per 100,000 population). ASIR, age-standardized incidence rate (per 100,000 population). ASR-DALYs, age-standardized DALYs rate (per 100,000 population). ASR-YLLs, age-standardized YLLs rate (per 100,000 population). ASR-YLDs, age-standardized YLDs rate (per 100,000 population).**

**Supplemental figure 4. Relationship between ASR of prevalence, incidence and DALYs, with SDI from 1990 to 2019.**

**Supplemental figure 5. The proportions of death numbers in India, China and America in global.**

**Supplemental table 1. Prevalence cases and age-standardized prevalence rate (ASPR) of chronic kidney disease in 1990 and 2019, and the temporal trends**

from 1990 to 2019 in global and regions.

**Supplemental table 2. Incidence cases and age-standardized incidence rate (ASIR) of chronic kidney disease in 1990 and 2019, and the temporal trends from 1990 to 2019 in global and regions.**

**Supplemental table 3. DALYs and age-standardized DALYs rate (ASR-DALYs) of chronic kidney disease in 1990 and 2019, and the temporal trends from 1990 to 2019 in global and regions.**

**Supplemental table 4. Deaths and age-standardized death rate (ASDR) of chronic kidney disease in 1990 and 2019, and the temporal trends from 1990 to 2019 in 204 countries.**

**Supplemental table 5. Death cases ratio between females to males and age-standardized death rate (ASDR) ratio between females to males in 21 geographic regions from 1990 to 2019 in 21 regions.**

**Supplemental table 6. Death cases ratio between females to males and age-standardized death rate (ASDR) ratio between females to males in 204 countries and territories from 1990 to 2019 in 204 countries.**

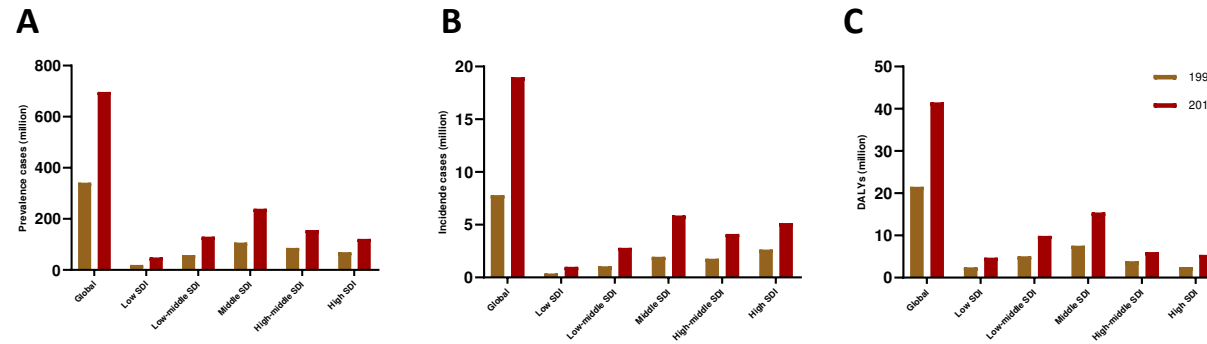

Supplemental figure 1. Numbers of prevalence, incidence and DALYs of CKD in global and SDI areas in 1990 and 2019. DALYs, disability-adjusted life years.

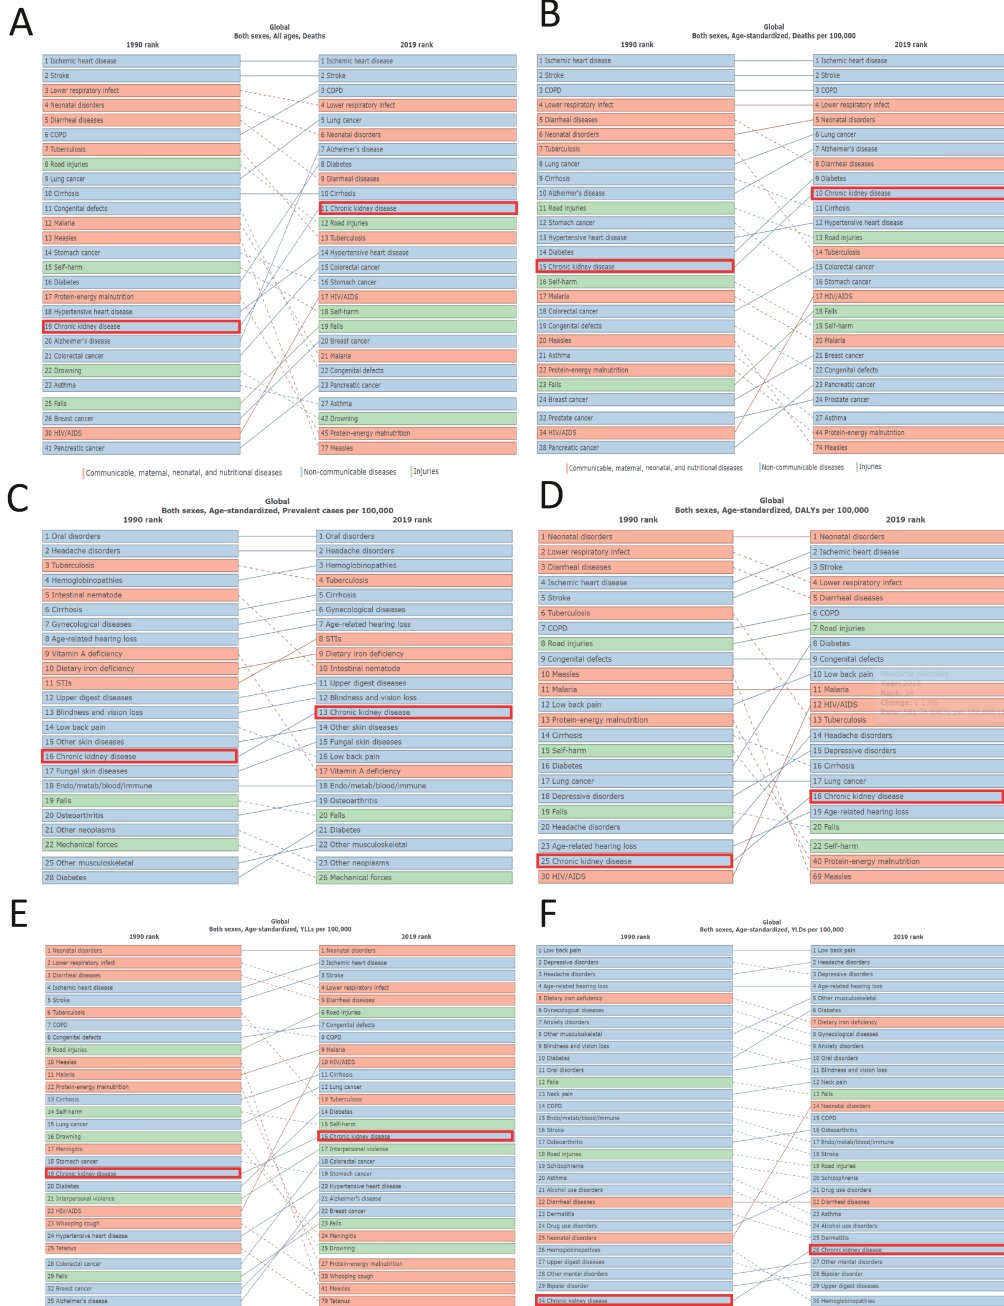

**Supplemental figure 2. The rank change of death numbers, ASDR, ASPR, ASR-DALYs, ASR-YLLs and ASR- YLDs of CKD from 1990 to 2019.** DALYs, disability-adjusted life years. YLLs, years of life lost prematurely. YLDs, years lived with disability. ASDR, age-standardized death rate (per 100,000 population). ASPR, age-standardized prevalence rate (per 100,000 population). ASR-DALYs, age-standardized DALYs rate (per 100,000 population). ASR-YLLs, age-standardized YLLs rate (per 100,000 population). ASR-YLDs, age-standardized YLDs rate (per 100,000 population).

Both

ASDR

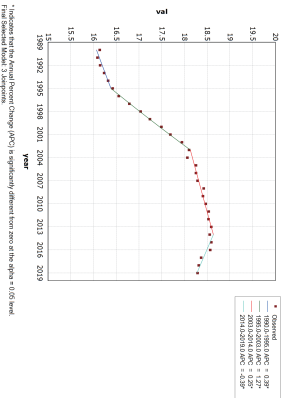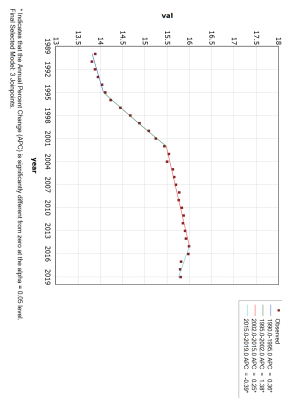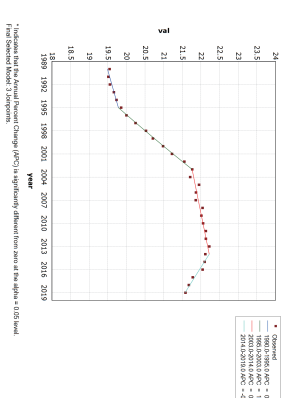

ASIR

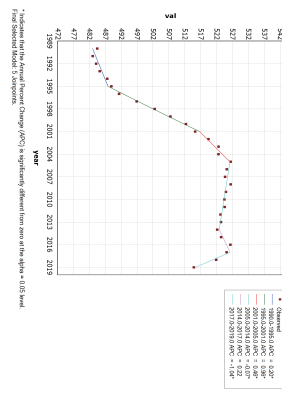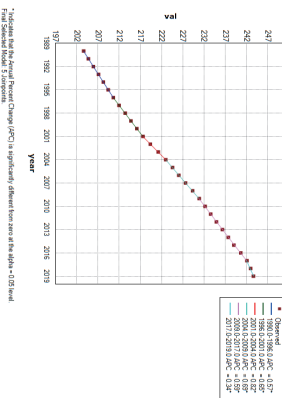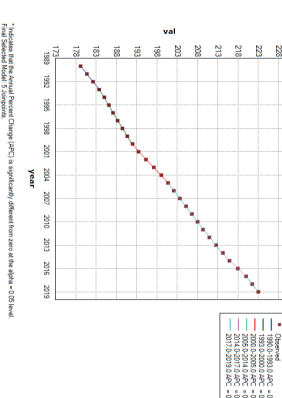

ASPR

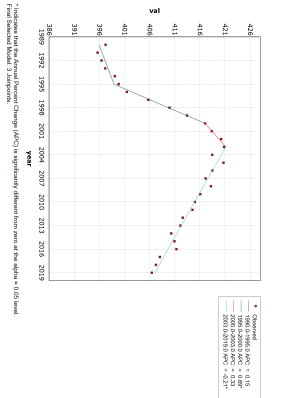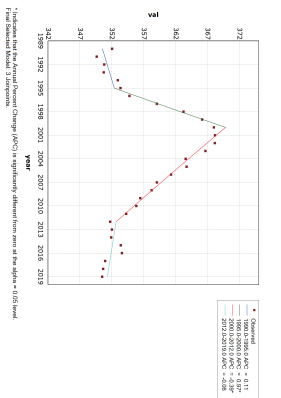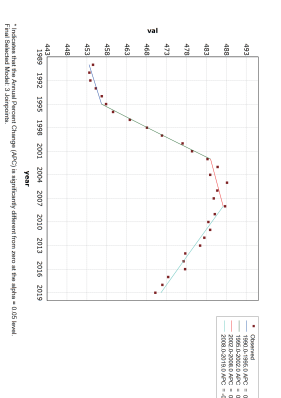

ASR-DALYS

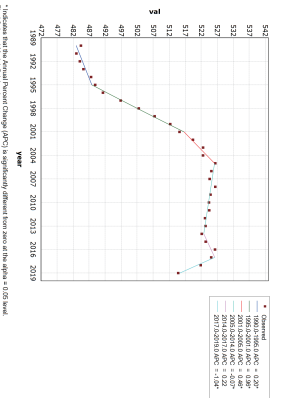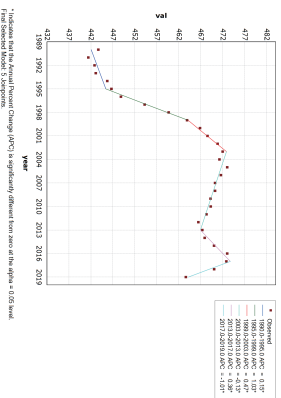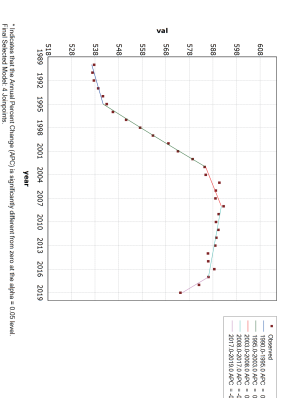

ASR-YLLS

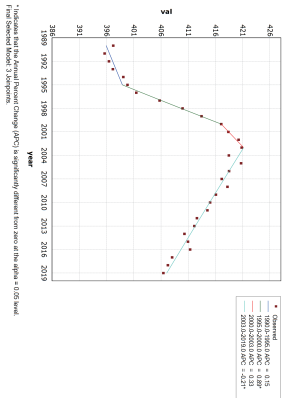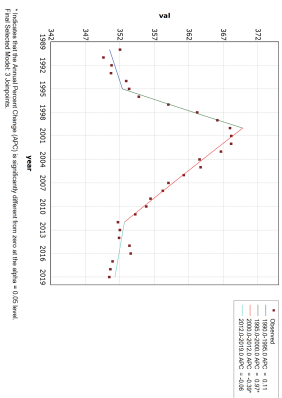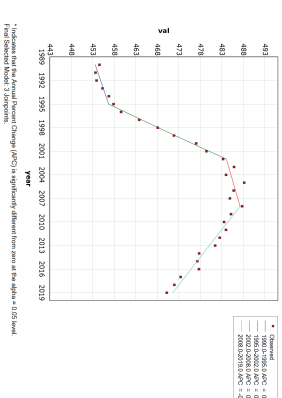

ASR-YLDs

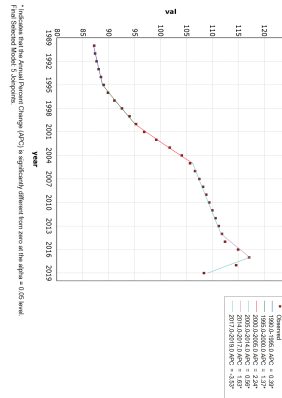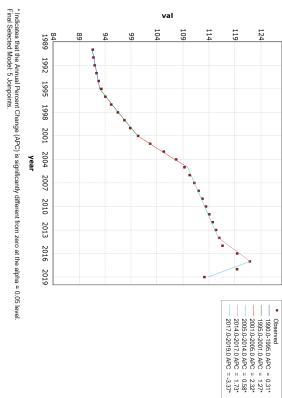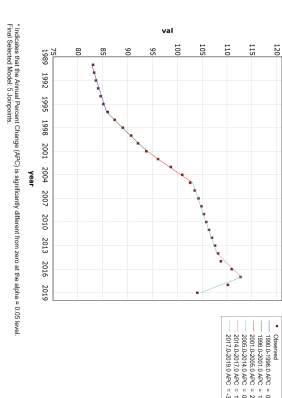

\*Indicates that the Annual Percent Change (APC) is significantly different from zero at the alpha = 0.05 level. Final Selected Model: 3. 3. 3. 3. 3.

\*Indicates that the Annual Percent Change (APC) is significantly different from zero at the alpha = 0.05 level. Final Selected Model: 3. 3. 3. 3. 3.

\*Indicates that the Annual Percent Change (APC) is significantly different from zero at the alpha = 0.05 level. Final Selected Model: 3. 3. 3. 3. 3.

**Supplemental figure 3. Temporal trends of ASDR, ASIR, ASPR, ASR-DALYs, ASR-YLLs and ASR- YLDs of CKD by genders from 1990 to 2019.** DALYs, disability-adjusted life years. YLLs, years of life lost prematurely. YLDs, years lived with disability. ASDR, age-standardized death rate (per 100,000 population). ASPR, age-standardized prevalence rate (per 100,000 population). ASIR, age-standardized incidence rate (per 100,000 population). ASR-DALYs, age-standardized DALYs rate (per 100,000 population). ASR-YLLs, age-standardized YLLs rate (per 100,000 population). ASR-YLDs, age-standardized YLDs rate (per 100,000 population).

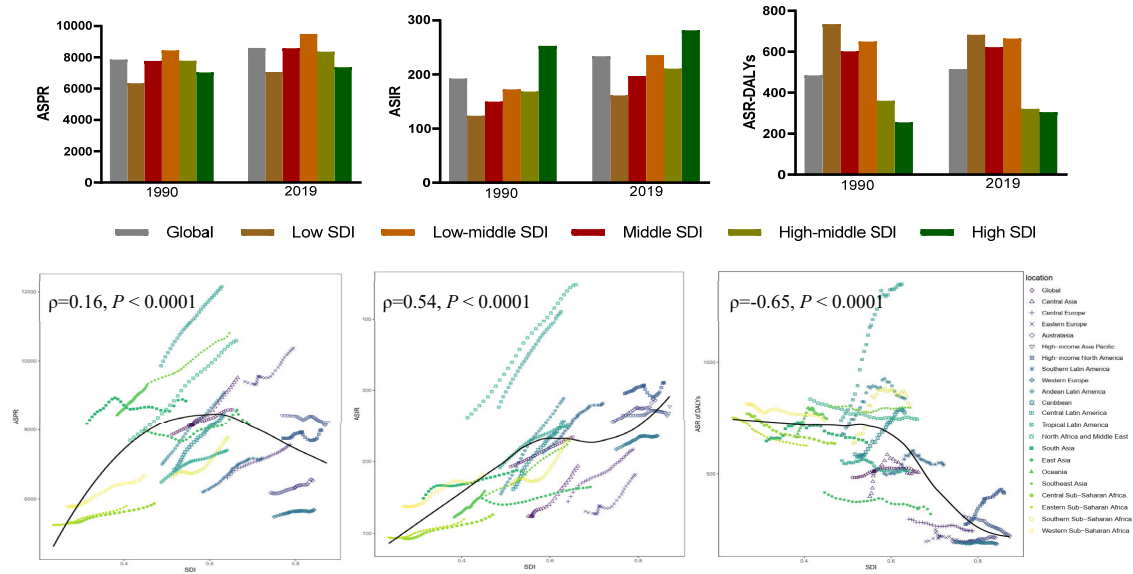

Supplemental figure 4. Relationship between ASR of prevalence, incidence and DALYs, with SDI from 1990 to 2019.



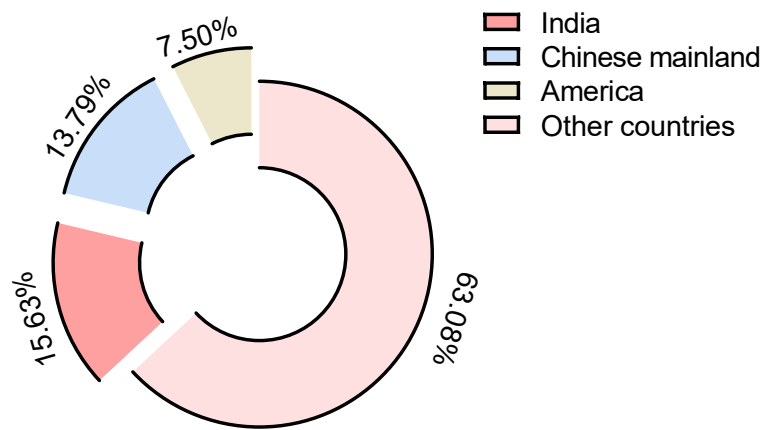

Supplemental figure 5. The proportions of death numbers in India, China and America in global.

**Supplemental table 1. Prevalence cases and age-standardized prevalence rate (ASPR) of chronic kidney disease in 1990 and 2019, and the temporal trends from 1990 to 2019 in global and regions.**

| Characteristics               | 1990                                 |                           | 2019                                 |                            | 1990-2019             |
|-------------------------------|--------------------------------------|---------------------------|--------------------------------------|----------------------------|-----------------------|
|                               | Prevalence cases (*10 <sup>6</sup> ) | ASPR per 100,000          | Prevalence cases (*10 <sup>6</sup> ) | ASPR per 100,000           | EAPC of ASPR (95% CI) |
|                               | (95% UI)                             | population (95% UI)       | (95% UI)                             | population (95% UI)        |                       |
| Global                        | 341.67 (316.59-366107.7)             | 7855.83 (7300.33-8372.66) | 697.29 (650.05-741080.75)            | 8596.21 (8015.74-9125.28)  | 0.32 (0.32 to 0.33)   |
| <b>Gender</b>                 |                                      |                           |                                      |                            |                       |
| Males                         | 153.14 (141.72-164.63)               | 7349.01 (6823.3-7842.18)  | 314.32 (292.96-334.84)               | 8109.77 (7572.96-8608.03)  | 0.69 (0.68 to 0.7)    |
| Females                       | 188.52 (174.87-201.34)               | 8305.89 (7710.48-8854.59) | 382.98 (356.75-406.65)               | 9049.82 (8425.02-9616.13)  | 0.69 (0.68 to 0.7)    |
| <b>Sociodemographic index</b> |                                      |                           |                                      |                            |                       |
| Low                           | 19.74 (18.26-21321.4)                | 6338.15 (5882.6-6789.29)  | 48.7 (45.05-52510.46)                | 7057.41 (6568.24-7529.2)   | 0.34 (0.32 to 0.36)   |
| Low-middle                    | 58.61 (54.03-63338.25)               | 7766.83 (7198.66-8314.67) | 130.15 (120.81-139501.25)            | 8579.86 (7996.24-9142.82)  | 0.25 (0.21 to 0.29)   |
| Middle                        | 107.24 (98.79-115911.52)             | 8440.84 (7808.66-9019.18) | 239.88 (222.64-256277.84)            | 9491.19 (8838.42-10086.19) | 0.48 (0.45 to 0.5)    |
| High-middle                   | 86.19 (79.75-92396.6)                | 7781.68 (7221.18-8317.69) | 156.23 (145.42-166645.78)            | 8350.95 (7763.91-8901.8)   | 0.32 (0.29 to 0.34)   |
| High                          | 69.73 (64.86-74222.57)               | 7026.65 (6533.72-7475.58) | 121.95 (114.53-129214.01)            | 7364.77 (6889.24-7796.06)  | 0.12 (0.09 to 0.14)   |
| <b>21 GBD regions</b>         |                                      |                           |                                      |                            |                       |
| Central Asia                  | 4.45 (4.11-4803.7)                   | 8137.03 (7524.1-8741.66)  | 8.15 (7.51-8784.58)                  | 9524.26 (8802.23-10175.81) | 0.59 (0.53 to 0.65)   |

|                              |                        |                            |                           |                              |                       |
|------------------------------|------------------------|----------------------------|---------------------------|------------------------------|-----------------------|
| Central Europe               | 9.15 (8.44-9807.35)    | 6605.48 (6109.43-7070.96)  | 13.57 (12.65-14461.73)    | 7564.59 (7024.38-8040.5)     | 0.42 (0.4 to 0.44)    |
| Eastern Europe               | 24.38 (22.55-26323.67) | 9409.89 (8700.06-10160.11) | 30.13 (27.96-32292.36)    | 10377.83 (9616.95-11142.47)  | 0.39 (0.34 to 0.44)   |
| Australasia                  | 1.41 (1.33-1487.37)    | 6177.9 (5831.64-6510.55)   | 2.95 (2.77-3128.02)       | 6532.01 (6133.49-6925.11)    | 0.22 (0.2 to 0.23)    |
| High-income Asia Pacific     | 16.55 (15.42-17679.41) | 8433.41 (7860.45-8971.08)  | 31 (29.12-32934.31)       | 8231.15 (7714.65-8729.32)    | -0.1 (-0.12 to -0.08) |
| High-income North America    | 26.23 (24.33-28067.57) | 7750.33 (7175.26-8252.76)  | 43.98 (41.11-46803.08)    | 7982.58 (7433.75-8484.6)     | 0.03 (-0.02 to 0.08)  |
| Southern Latin America       | 2.85 (2.66-3038.14)    | 6199.61 (5786.14-6591)     | 5.72 (5.38-6077.58)       | 7174.32 (6750.95-7629.01)    | 0.54 (0.49 to 0.59)   |
| Western Europe               | 29.05 (27.04-30993.2)  | 5488.94 (5116.7-5832.82)   | 45.44 (42.65-48233.7)     | 5690.53 (5326.14-6020.93)    | 0.08 (0.06 to 0.1)    |
| Andean Latin America         | 1.76 (1.52-2061.21)    | 7004.76 (6076.38-8070.59)  | 5.32 (4.71-6069.48)       | 9101.2 (8067.32-10290.91)    | 0.93 (0.91 to 0.94)   |
| Caribbean                    | 1.97 (1.84-2108.93)    | 6840.61 (6371.07-7299.12)  | 4.29 (4.03-4568.68)       | 8457.06 (7927.23-8994.33)    | 0.74 (0.7 to 0.78)    |
| Central Latin America        | 10.31 (9.55-11027.08)  | 9865 (9168.77-10521.68)    | 29.53 (27.68-31265.59)    | 12139.27 (11377.05-12843.88) | 0.68 (0.64 to 0.71)   |
| Tropical Latin America       | 7.08 (6.58-7550.26)    | 6482.97 (6054.23-6886)     | 17.9 (16.76-18992.36)     | 7399.15 (6923.65-7835.63)    | 0.42 (0.39 to 0.45)   |
| North Africa and Middle East | 15.77 (14.73-16764.82) | 7697.07 (7182.72-8168.78)  | 49.8 (46.52-52818.54)     | 10589.67 (9930.4-11229.54)   | 1.17 (1.13 to 1.22)   |
| South Asia                   | 60.22 (55.46-65289.02) | 8186.89 (7582.95-8782.32)  | 139.51 (128.99-150327.5)  | 8847.66 (8206.45-9453.58)    | 0.11 (0.03 to 0.18)   |
| East Asia                    | 82.94 (76.25-90185.75) | 7989.69 (7377.2-8599.68)   | 156.84 (144.51-169062.38) | 8180.65 (7568.21-8798.3)     | 0.29 (0.2 to 0.37)    |
| Oceania                      | 0.36 (0.33-391.33)     | 8440.17 (7784.51-9111.81)  | 0.9 (0.82-974.96)         | 9296.4 (8596.13-9971.06)     | 0.3 (0.29 to 0.31)    |

---

|                             |                        |                            |                        |                             |                     |
|-----------------------------|------------------------|----------------------------|------------------------|-----------------------------|---------------------|
| Southeast Asia              | 31.01 (28.51-33656.96) | 9351.48 (8661.82-10057.66) | 71.14 (65.94-76348.22) | 10803.4 (10057.32-11534.34) | 0.5 (0.49 to 0.52)  |
| Central Sub-Saharan Africa  | 1.69 (1.55-1841.1)     | 5306.9 (4899.19-5732.96)   | 4.52 (4.16-4907.57)    | 5867.73 (5434.29-6284.81)   | 0.36 (0.32 to 0.39) |
| Eastern Sub-Saharan Africa  | 5.54 (5.12-5997.22)    | 5254.32 (4862.09-5638.51)  | 13.92 (12.84-15065.98) | 5800.09 (5395.2-6210.24)    | 0.36 (0.33 to 0.38) |
| Southern Sub-Saharan Africa | 2.3 (2.13-2464.83)     | 6633.49 (6172.65-7075.02)  | 5.02 (4.66-5366.22)    | 7769.91 (7260.61-8261.86)   | 0.53 (0.45 to 0.61) |
| Western Sub-Saharan Africa  | 6.64 (6.16-7139.44)    | 5768.63 (5363.39-6151.96)  | 17.67 (16.4-18953.01)  | 6678.91 (6225.96-7102.83)   | 0.56 (0.52 to 0.59) |

---

**Supplemental table 2. Incidence cases and age-standardized incidence rate (ASIR) of chronic kidney disease in 1990 and 2019, and the temporal trends from 1990 to 2019 in global and regions.**

| Characteristics               | 1990                                |                        | 2019                                |                        | 1990-2019             |
|-------------------------------|-------------------------------------|------------------------|-------------------------------------|------------------------|-----------------------|
|                               | Incidence cases (*10 <sup>6</sup> ) | ASIR per 100,000       | Incidence cases (*10 <sup>6</sup> ) | ASIR per 100,000       | EAPC of ASIR (95% CI) |
|                               | (95% UI)                            | population (95% UI)    | (95% UI)                            | population (95% UI)    |                       |
| Global                        | 7.8 (7.17-8485.39)                  | 192.45 (177.31-209.05) | 18.99 (17.56-20518.16)              | 233.65 (216.56-252.31) | 0.69 (0.68 to 0.7)    |
| <b>Gender</b>                 |                                     |                        |                                     |                        |                       |
| Males                         | 3.36 (3.09-3.65)                    | 179.21 (164.8-194.74)  | 8.51 (7.84-9.23)                    | 223.02 (206.07-241.18) | 0.69 (0.68 to 0.7)    |
| Females                       | 4.44 (4.08-4.84)                    | 203.64 (187.5-221.38)  | 10.47 (9.7-11.32)                   | 243.63 (225.94-262.66) | 0.69 (0.68 to 0.7)    |
| <b>Sociodemographic index</b> |                                     |                        |                                     |                        |                       |
| Low                           | 0.37 (0.34-398.17)                  | 123.72 (114.25-133.97) | 1.01 (0.93-1085.2)                  | 161.24 (148.07-175.64) | 0.95 (0.92 to 0.99)   |
| Low-middle                    | 1.05 (0.97-1139.39)                 | 149.68 (137.38-162.87) | 2.81 (2.58-3056.52)                 | 197.07 (181.51-214.36) | 0.91 (0.87 to 0.95)   |
| Middle                        | 1.95 (1.79-2127.2)                  | 172.4 (157.74-188.79)  | 5.87 (5.4-6373.37)                  | 235.71 (218.23-254.87) | 1.17 (1.14 to 1.2)    |
| High-middle                   | 1.78 (1.63-1952.09)                 | 168.37 (154.83-183.45) | 4.13 (3.8-4493.35)                  | 210.65 (194.34-228.37) | 0.89 (0.86 to 0.92)   |
| High                          | 2.64 (2.41-2883.51)                 | 252.66 (232.46-274.36) | 5.15 (4.75-5569.87)                 | 281.67 (260.21-303.81) | 0.28 (0.24 to 0.32)   |
| <b>21 GBD regions</b>         |                                     |                        |                                     |                        |                       |
| Central Asia                  | 0.07 (0.06-75.25)                   | 123.99 (113.45-135.88) | 0.16 (0.15-178.53)                  | 193.3 (176.73-211.27)  | 1.69 (1.52 to 1.87)   |

|                              |                     |                        |                     |                        |                      |
|------------------------------|---------------------|------------------------|---------------------|------------------------|----------------------|
| Central Europe               | 0.21 (0.19-229.95)  | 144.36 (131.43-158.87) | 0.44 (0.4-481.17)   | 216.5 (197.99-236.75)  | 1.21 (1.12 to 1.3)   |
| Eastern Europe               | 0.34 (0.3-370.22)   | 130.48 (119.44-142.71) | 0.54 (0.49-599.18)  | 181.85 (166.07-199.03) | 1.32 (1.15 to 1.49)  |
| Australasia                  | 0.06 (0.06-65.23)   | 254.5 (240.37-269.78)  | 0.14 (0.13-153.73)  | 286.14 (264.78-308.93) | 0.37 (0.33 to 0.41)  |
| High-income Asia Pacific     | 0.53 (0.49-577.29)  | 265.13 (244.47-287.79) | 1.21 (1.11-1315.46) | 277.51 (255.67-300.82) | 0.08 (0.04 to 0.13)  |
| High-income North America    | 1.04 (0.94-1140.52) | 295.47 (270.34-323.33) | 1.89 (1.73-2062.59) | 310.44 (284.74-336.3)  | 0.03 (-0.05 to 0.12) |
| Southern Latin America       | 0.1 (0.09-106.64)   | 211.66 (193.13-230.93) | 0.23 (0.22-253.7)   | 282.02 (260.12-304.6)  | 1.02 (0.93 to 1.1)   |
| Western Europe               | 1.28 (1.16-1410.45) | 216.75 (198.62-236.36) | 2.16 (1.99-2344.51) | 235.6 (216.93-254.91)  | 0.25 (0.2 to 0.3)    |
| Andean Latin America         | 0.04 (0.03-38.3)    | 154.8 (142.57-167.62)  | 0.16 (0.15-175.89)  | 288.34 (264.91-311.21) | 2.2 (2.09 to 2.3)    |
| Caribbean                    | 0.04 (0.04-48.74)   | 161.46 (148.31-176.22) | 0.13 (0.12-141.71)  | 256.39 (237.73-277)    | 1.58 (1.48 to 1.68)  |
| Central Latin America        | 0.27 (0.25-292.01)  | 276.65 (252.64-304.54) | 0.99 (0.93-1060.8)  | 409.61 (383.06-437.91) | 1.29 (1.21 to 1.36)  |
| Tropical Latin America       | 0.19 (0.18-210.14)  | 191.28 (176.52-209.33) | 0.6 (0.56-655.92)   | 250.85 (233.24-272.18) | 0.89 (0.82 to 0.96)  |
| North Africa and Middle East | 0.51 (0.47-550.25)  | 261.9 (240.97-285.91)  | 2.03 (1.88-2202.72) | 447.48 (415.13-482.83) | 1.97 (1.87 to 2.08)  |
| South Asia                   | 1.01 (0.93-1104.53) | 148.9 (136.4-162.57)   | 2.67 (2.43-2918.85) | 181.87 (165.91-198.75) | 0.61 (0.54 to 0.68)  |
| East Asia                    | 1.33 (1.21-1465.64) | 148.49 (135.05-163.27) | 3.27 (2.98-3599.05) | 164.52 (150.62-179.18) | 0.61 (0.51 to 0.7)   |
| Oceania                      | 0 (0-5.25)          | 122.53 (112.38-133.56) | 0.01 (0.01-14.89)   | 158.68 (145.3-172.89)  | 0.79 (0.74 to 0.84)  |



---

|                             |                    |                        |                     |                        |                     |
|-----------------------------|--------------------|------------------------|---------------------|------------------------|---------------------|
| Southeast Asia              | 0.45 (0.42-491.19) | 152.65 (140.55-165.93) | 1.43 (1.31-1547.89) | 227.98 (210.24-246.38) | 1.4 (1.37 to 1.44)  |
| Central Sub-Saharan Africa  | 0.03 (0.03-30.16)  | 93.07 (86.17-100.24)   | 0.08 (0.08-89.02)   | 125.99 (115.7-136.67)  | 1.11 (1.01 to 1.2)  |
| Eastern Sub-Saharan Africa  | 0.09 (0.09-99.99)  | 94.39 (87.18-102.21)   | 0.24 (0.22-258.06)  | 119.54 (109.76-130.11) | 0.86 (0.78 to 0.93) |
| Southern Sub-Saharan Africa | 0.05 (0.05-57.56)  | 168.63 (154.1-184.7)   | 0.14 (0.13-149.6)   | 231.14 (212.43-251.73) | 1.04 (0.85 to 1.23) |
| Western Sub-Saharan Africa  | 0.16 (0.15-168.99) | 137.2 (126.96-148.29)  | 0.44 (0.41-470.76)  | 181.8 (167.29-197.54)  | 1.13 (1.01 to 1.24) |

---

**Supplemental table 3. DALYs and age-standardized DALYs rate (ASR-DALYs) of chronic kidney disease in 1990 and 2019, and the temporal trends from 1990 to 2019 in global and regions.**

| Characteristics               | 1990                               |                                           | 2019                               |                                           | 1990-2019                  |
|-------------------------------|------------------------------------|-------------------------------------------|------------------------------------|-------------------------------------------|----------------------------|
|                               | DALYs (*10 <sup>6</sup> ) (95% UI) | ASR-DALYs per 100,000 population (95% UI) | DALYs (*10 <sup>6</sup> ) (95% UI) | ASR-DALYs per 100,000 population (95% UI) | EAPC of ASR-DALYs (95% CI) |
| Global                        | 21.5 (20.04-23065.78)              | 484.46 (452.28-518.67)                    | 41.54 (38.29-45037.86)             | 514.86 (474.91-558.86)                    | 0.31 (0.23 to 0.38)        |
| <b>Gender</b>                 |                                    |                                           |                                    |                                           |                            |
| Males                         | 11.2 (10.4-12.15)                  | 537.61 (499.52-580.01)                    | 21.98 (20.14-23.97)                | 574.23 (527.52-625.27)                    | 0.35 (0.27 to 0.43)        |
| Females                       | 10.3 (9.46-11.22)                  | 443.69 (409.36-481.56)                    | 19.56 (17.7-21.47)                 | 463.61 (419.34-509.95)                    | 0.21 (0.15 to 0.28)        |
| <b>Sociodemographic index</b> |                                    |                                           |                                    |                                           |                            |
| Low                           | 2.45 (2.18-2728.52)                | 734.23 (667.32-804.58)                    | 4.73 (4.21-5276.93)                | 682.18 (615.56-752.04)                    | -0.24 (-0.28 to -0.21)     |
| Low-middle                    | 5.05 (4.56-5598.22)                | 649.9 (591.82-714.59)                     | 9.91 (8.98-10820.22)               | 664.18 (603.21-723.92)                    | 0.1 (0 to 0.21)            |
| Middle                        | 7.55 (7.02-8112.98)                | 601.87 (560.14-645.51)                    | 15.44 (14.17-16837.37)             | 621.93 (570.74-676.64)                    | 0.27 (0.21 to 0.33)        |
| High-middle                   | 3.89 (3.6-4213.22)                 | 360.16 (332.75-390.43)                    | 6.05 (5.49-6665.14)                | 320.68 (290.18-353.73)                    | -0.36 (-0.46 to -0.27)     |
| High                          | 2.54 (2.33-2787.23)                | 254.32 (232.26-279.43)                    | 5.38 (4.87-5884.31)                | 304.13 (274.09-335.44)                    | 0.8 (0.72 to 0.89)         |
| <b>21 GBD regions</b>         |                                    |                                           |                                    |                                           |                            |
| Central Asia                  | 0.23 (0.22-256.33)                 | 397.89 (367.64-442.65)                    | 0.43 (0.39-481.73)                 | 506.72 (456.51-562.2)                     | 0.48 (0.16 to 0.79)        |

|                              |                     |                        |                     |                           |                        |
|------------------------------|---------------------|------------------------|---------------------|---------------------------|------------------------|
| Central Europe               | 0.41 (0.38-437.53)  | 297.3 (278.39-317.88)  | 0.46 (0.4-523.54)   | 243.84 (212.01-278.04)    | -0.62 (-0.69 to -0.55) |
| Eastern Europe               | 0.49 (0.45-547.25)  | 197 (177.48-218.85)    | 0.56 (0.49-638.34)  | 196.77 (170.51-224.02)    | -0.51 (-0.73 to -0.28) |
| Australasia                  | 0.04 (0.04-48.98)   | 196.75 (180.03-215.38) | 0.1 (0.09-115.71)   | 214.3 (191.2-238.39)      | 0.45 (0.4 to 0.5)      |
| High-income Asia Pacific     | 0.59 (0.55-642.57)  | 310.61 (285.7-334.9)   | 0.96 (0.84-1067.61) | 218.58 (192.71-243.9)     | -1.16 (-1.21 to -1.1)  |
| High-income North America    | 0.93 (0.85-1032.34) | 273.54 (247.51-303.34) | 2.42 (2.22-2641.09) | 413.63 (379.73-450.68)    | 1.69 (1.51 to 1.88)    |
| Southern Latin America       | 0.23 (0.22-245.13)  | 501.82 (472.93-530.86) | 0.44 (0.41-472.11)  | 540.08 (500.88-579.63)    | 0.25 (0.02 to 0.48)    |
| Western Europe               | 1.08 (0.99-1188.03) | 197.18 (179.66-216.97) | 1.75 (1.56-1921.1)  | 186.58 (166.88-208.38)    | -0.04 (-0.09 to 0.02)  |
| Andean Latin America         | 0.18 (0.17-196.15)  | 680.42 (626.59-742.08) | 0.48 (0.4-564.87)   | 836.34 (704.25-981.59)    | 0.84 (0.59 to 1.1)     |
| Caribbean                    | 0.17 (0.16-189.99)  | 587 (541.65-647.03)    | 0.39 (0.34-454.01)  | 774.89 (668-896.08)       | 1.32 (1.22 to 1.42)    |
| Central Latin America        | 0.78 (0.72-840.29)  | 739.23 (689.04-794.6)  | 3.28 (2.92-3697.82) | 1348.14 (1203.58-1521.61) | 2.3 (2.01 to 2.59)     |
| Tropical Latin America       | 0.61 (0.58-650.99)  | 559.23 (528.14-592.5)  | 1.24 (1.15-1332.95) | 513.36 (476.05-553.4)     | -0.37 (-0.46 to -0.29) |
| North Africa and Middle East | 1.77 (1.62-1930.04) | 834.93 (762.27-947.15) | 3.38 (2.92-3897.91) | 744.36 (646.14-851.75)    | -0.37 (-0.43 to -0.31) |
| South Asia                   | 4.69 (4.05-5324.9)  | 647.1 (557.75-731.83)  | 9.89 (8.8-11052.83) | 640.65 (568.76-715.48)    | -0.06 (-0.24 to 0.11)  |
| East Asia                    | 4.2 (3.73-4664.95)  | 416.47 (371.77-461.55) | 6.21 (5.36-7049.94) | 320.44 (277.88-362.19)    | -0.58 (-0.68 to -0.48) |
| Oceania                      | 0.03 (0.02-32.15)   | 664.24 (581.19-758.07) | 0.07 (0.06-83.48)   | 747.22 (629.25-880.16)    | 0.27 (0.09 to 0.44)    |

---

|                             |                     |                        |                     |                        |                        |
|-----------------------------|---------------------|------------------------|---------------------|------------------------|------------------------|
| Southeast Asia              | 2.7 (2.49-2945.17)  | 806.56 (741.95-875.79) | 5.11 (4.61-5673.54) | 796.69 (720.03-881.21) | -0.02 (-0.07 to 0.03)  |
| Central Sub-Saharan Africa  | 0.26 (0.22-303.29)  | 769.07 (656.59-891.05) | 0.46 (0.37-563.41)  | 635.98 (510.34-766.78) | -0.73 (-0.77 to -0.7)  |
| Eastern Sub-Saharan Africa  | 0.84 (0.71-949.63)  | 752.43 (668.49-837.88) | 1.4 (1.21-1581.03)  | 626.45 (557.9-698.14)  | -0.73 (-0.77 to -0.69) |
| Southern Sub-Saharan Africa | 0.22 (0.2-249.55)   | 636.93 (576.23-723.35) | 0.5 (0.45-545.96)   | 803.81 (733.62-878.51) | 0.94 (0.63 to 1.25)    |
| Western Sub-Saharan Africa  | 1.03 (0.87-1218.24) | 813.99 (702.78-957.03) | 2.01 (1.67-2371.3)  | 738.79 (627.78-857.08) | -0.27 (-0.3 to -0.23)  |

---

**Supplemental table 4. Deaths and age-standardized death rate (ASDR) of chronic kidney disease in 1990 and 2019, and the temporal trends from 1990 to 2019 in 204 countries.**

| location            | Death cases in 1990 (*10 <sup>3</sup> ) | ASDR in 1990 (per 100,000 population) | Death cases in 2019 (*10 <sup>3</sup> ) | ASDR in 2019 (per 100,000 population) | EAPC of ASDR from 1990 to 2019 |
|---------------------|-----------------------------------------|---------------------------------------|-----------------------------------------|---------------------------------------|--------------------------------|
| Afghanistan         | 3.71 (2.82-5.06)                        | 55.94 (42.01-81.56)                   | 5.64 (4.33-7.92)                        | 49.37 (37.14-74.78)                   | -0.33 (-0.37 to -0.28)         |
| Albania             | 0.24 (0.22-0.26)                        | 11.53 (10.65-12.4)                    | 0.33 (0.25-0.42)                        | 8.24 (6.22-10.66)                     | -1.1 (-1.34 to -0.86)          |
| Algeria             | 3.56 (2.74-4.96)                        | 38.73 (30.35-52.07)                   | 8.2 (6.35-10.89)                        | 31.57 (24.78-41.16)                   | -0.5 (-0.67 to -0.33)          |
| American Samoa      | 0.01 (0.01-0.01)                        | 40.55 (34.26-46.31)                   | 0.03 (0.02-0.03)                        | 59.34 (51.03-69)                      | 1.41 (1.28 to 1.55)            |
| Andorra             | 0 (0-0.01)                              | 11.21 (8.79-14.36)                    | 0.02 (0.01-0.02)                        | 9.86 (7.46-12.24)                     | -0.39 (-0.57 to -0.2)          |
| Angola              | 1.06 (0.76-1.34)                        | 27.03 (19.77-33.28)                   | 2.46 (1.73-3.16)                        | 24.77 (17.36-31.37)                   | -0.37 (-0.42 to -0.33)         |
| Antigua and Barbuda | 0.01 (0.01-0.02)                        | 26.3 (23.81-28.66)                    | 0.04 (0.03-0.04)                        | 39.05 (33.55-45.31)                   | 1.69 (1.48 to 1.91)            |
| Argentina           | 7.13 (6.72-7.54)                        | 23.49 (22.02-24.9)                    | 15.66 (14.21-17.05)                     | 28.36 (25.83-30.9)                    | 0.57 (0.27 to 0.88)            |
| Armenia             | 0.07 (0.06-0.07)                        | 3.03 (2.76-3.3)                       | 0.45 (0.38-0.52)                        | 11.35 (9.53-13.22)                    | 4.65 (4.33 to 4.97)            |
| Australia           | 1.71 (1.56-1.83)                        | 9.49 (8.57-10.15)                     | 5.21 (4.29-5.89)                        | 10.75 (9.03-12.08)                    | 0.62 (0.51 to 0.74)            |

|                                  |                  |                     |                     |                     |                        |
|----------------------------------|------------------|---------------------|---------------------|---------------------|------------------------|
| Austria                          | 0.74 (0.68-0.79) | 6.13 (5.62-6.53)    | 3.37 (2.86-3.73)    | 14.87 (12.79-16.36) | 4.46 (3.94 to 4.98)    |
| Azerbaijan                       | 0.53 (0.47-0.59) | 9.6 (8.55-10.9)     | 1.39 (1.16-1.63)    | 17.85 (14.56-20.65) | 2.69 (2.23 to 3.16)    |
| Bahamas                          | 0.04 (0.03-0.04) | 24.48 (22.11-26.99) | 0.11 (0.09-0.14)    | 30.35 (24.98-36.57) | 1.14 (0.98 to 1.3)     |
| Bahrain                          | 0.04 (0.04-0.05) | 38.45 (31.97-46.81) | 0.18 (0.14-0.22)    | 34.82 (27.94-42.19) | -0.09 (-0.63 to 0.45)  |
| Bangladesh                       | 7.7 (5.05-9.75)  | 13.66 (10.12-16.55) | 12.78 (10.18-15.68) | 10.9 (8.74-13.31)   | -0.56 (-0.91 to -0.2)  |
| Barbados                         | 0.05 (0.05-0.06) | 18.45 (17.07-19.95) | 0.12 (0.1-0.14)     | 25.66 (21.37-30.06) | 1.14 (0.93 to 1.35)    |
| Belarus                          | 0.28 (0.26-0.29) | 2.32 (2.15-2.46)    | 0.5 (0.4-0.62)      | 3.2 (2.57-3.97)     | 1.48 (0.93 to 2.04)    |
| Belgium                          | 1.42 (1.3-1.53)  | 9.13 (8.31-9.81)    | 2.96 (2.5-3.34)     | 9.89 (8.49-11.03)   | 0.38 (0.28 to 0.48)    |
| Belize                           | 0.02 (0.02-0.02) | 22.74 (20.41-25.07) | 0.11 (0.1-0.13)     | 40.49 (35.02-46.66) | 2.2 (1.72 to 2.69)     |
| Benin                            | 0.75 (0.64-0.87) | 35.15 (30.27-40.77) | 1.58 (1.19-2.06)    | 32.41 (25.19-40.64) | -0.15 (-0.23 to -0.07) |
| Bermuda                          | 0.01 (0.01-0.01) | 16.94 (15.52-18.34) | 0.02 (0.02-0.02)    | 14.55 (12.11-17.38) | -0.18 (-0.35 to -0.01) |
| Bhutan                           | 0.06 (0.04-0.08) | 22.36 (14.86-31.31) | 0.15 (0.1-0.19)     | 28.1 (20.41-35.31)  | 0.86 (0.81 to 0.91)    |
| Bolivia (Plurinational State of) | 1.23 (1.02-1.52) | 39.15 (32.12-49.14) | 4.42 (3.41-5.56)    | 55.89 (43.24-69.91) | 1.3 (1.23 to 1.38)     |

|                          |                    |                     |                     |                     |                        |
|--------------------------|--------------------|---------------------|---------------------|---------------------|------------------------|
| Bosnia and Herzegovina   | 0.34 (0.32-0.36)   | 9.3 (8.68-9.91)     | 0.66 (0.53-0.8)     | 11.56 (9.29-14.09)  | 0.8 (0.55 to 1.05)     |
| Botswana                 | 0.14 (0.1-0.19)    | 27.26 (20.38-37.49) | 0.44 (0.31-0.61)    | 37.05 (26.41-49.7)  | 0.64 (0.29 to 0.99)    |
| Brazil                   | 16.25 (15.53-16.8) | 19.48 (18.27-20.26) | 42.34 (38.66-44.67) | 18.6 (16.9-19.66)   | -0.09 (-0.17 to -0.02) |
| Brunei Darussalam        | 0.03 (0.03-0.03)   | 36.65 (32.22-41.02) | 0.08 (0.07-0.09)    | 37 (32.83-41.35)    | 0.74 (0.49 to 0.99)    |
| Bulgaria                 | 0.75 (0.7-0.79)    | 6.89 (6.49-7.29)    | 1.95 (1.58-2.38)    | 14.23 (11.57-17.43) | 2.68 (2.32 to 3.05)    |
| Burkina Faso             | 1.25 (1.03-1.48)   | 30.19 (25.23-35.72) | 2.82 (2.28-3.4)     | 30.98 (25.71-36.7)  | 0.03 (-0.07 to 0.13)   |
| Burundi                  | 0.74 (0.58-0.94)   | 31.09 (24.22-39.09) | 1.04 (0.81-1.33)    | 25.11 (19.84-31.23) | -1 (-1.1 to -0.9)      |
| Cabo Verde               | 0.04 (0.03-0.04)   | 15.38 (13.65-18.09) | 0.1 (0.09-0.12)     | 24.42 (21.5-27.42)  | 0.8 (0.48 to 1.12)     |
| Cambodia                 | 1.17 (0.97-1.38)   | 23.11 (19.27-27.26) | 2.19 (1.77-2.6)     | 19.77 (16.16-22.88) | -0.64 (-0.73 to -0.56) |
| Cameroon                 | 1.93 (1.49-2.38)   | 46.32 (35.64-56.56) | 4.78 (3.53-6.3)     | 42.01 (31.74-53.82) | -0.29 (-0.36 to -0.22) |
| Canada                   | 2.64 (2.38-2.83)   | 8.44 (7.58-9.05)    | 7.5 (6.43-8.41)     | 9.67 (8.4-10.78)    | 0.22 (0.1 to 0.34)     |
| Central African Republic | 0.36 (0.27-0.45)   | 31.47 (23.87-38.91) | 0.65 (0.48-0.86)    | 31.44 (23.07-40.76) | 0.05 (-0.07 to 0.16)   |
| Chad                     | 0.92 (0.71-1.28)   | 31.71 (24.21-44.14) | 1.82 (1.36-2.4)     | 31.47 (24.21-40.94) | 0.04 (-0.05 to 0.14)   |



|                                       |                     |                     |                        |                     |                        |
|---------------------------------------|---------------------|---------------------|------------------------|---------------------|------------------------|
| Chile                                 | 1.35 (1.28-1.42)    | 15.12 (14.14-15.91) | 5.04 (4.47-5.49)       | 21.2 (18.81-23.09)  | 1.54 (1.18 to 1.91)    |
| China                                 | 98.61 (86.8-111.08) | 12.98 (11.52-14.53) | 196.73 (168.24-224.68) | 11.23 (9.63-12.77)  | -0.21 (-0.32 to -0.09) |
| Colombia                              | 3.56 (3.35-3.74)    | 21.24 (19.51-22.52) | 9.5 (7.33-11.97)       | 17.48 (13.59-22.1)  | -0.65 (-0.81 to -0.5)  |
| Comoros                               | 0.06 (0.04-0.08)    | 28.88 (19.76-36.55) | 0.12 (0.1-0.14)        | 26.32 (22.01-31.51) | -0.51 (-0.64 to -0.38) |
| Congo                                 | 0.37 (0.26-0.46)    | 36.99 (26.02-46.61) | 0.7 (0.48-0.92)        | 31.9 (21.82-40.63)  | -0.68 (-0.79 to -0.56) |
| Cook Islands                          | 0 (0-0)             | 23.6 (19.81-27.56)  | 0.01 (0.01-0.01)       | 29.72 (24.86-35)    | 0.99 (0.9 to 1.07)     |
| Costa Rica                            | 0.26 (0.24-0.27)    | 14.97 (13.7-16.1)   | 1.37 (1.08-1.71)       | 26.61 (20.83-33.09) | 1.89 (1.41 to 2.37)    |
| Croatia                               | 0.43 (0.39-0.46)    | 7.27 (6.69-7.85)    | 0.92 (0.74-1.14)       | 9.7 (7.84-11.9)     | 0.93 (0.56 to 1.3)     |
| Cuba                                  | 0.82 (0.77-0.86)    | 7.98 (7.53-8.38)    | 2.73 (2.24-3.32)       | 14.43 (11.8-17.53)  | 2.61 (2.35 to 2.86)    |
| Cyprus                                | 0.18 (0.16-0.21)    | 33.7 (29.01-39.16)  | 0.33 (0.29-0.38)       | 20.62 (17.88-23.26) | -2.01 (-2.19 to -1.83) |
| Czechia                               | 1.08 (1.03-1.13)    | 8.09 (7.7-8.44)     | 1.32 (1.07-1.56)       | 6 (4.88-7.14)       | -0.94 (-1.08 to -0.8)  |
| Democratic People's Republic of Korea | 2.38 (1.86-2.97)    | 15.72 (12.48-19.16) | 4.32 (3.51-5.28)       | 14.24 (11.58-17.26) | -0.28 (-0.41 to -0.14) |
| Democratic Republic of the Congo      | 4.42 (3.69-5.24)    | 30.47 (25.83-35.58) | 8.03 (6.4-9.93)        | 24.79 (19.49-30.7)  | -0.81 (-0.85 to -0.77) |

|                    |                  |                     |                     |                     |                       |
|--------------------|------------------|---------------------|---------------------|---------------------|-----------------------|
| Denmark            | 0.37 (0.34-0.4)  | 4.43 (4.05-4.75)    | 1.13 (0.98-1.26)    | 8.8 (7.65-9.71)     | 2.37 (1.93 to 2.8)    |
| Djibouti           | 0.03 (0.02-0.04) | 23.64 (17.63-30.82) | 0.14 (0.1-0.18)     | 28.41 (22.57-36.87) | 0.58 (0.48 to 0.68)   |
| Dominica           | 0.03 (0.02-0.03) | 35.66 (32.01-39.51) | 0.04 (0.04-0.05)    | 48.01 (39.68-57.88) | 1.35 (1.23 to 1.47)   |
| Dominican Republic | 0.58 (0.52-0.65) | 15.07 (13.33-16.88) | 2.28 (1.69-3.04)    | 24.98 (18.71-33.09) | 2.79 (2.47 to 3.12)   |
| Ecuador            | 1.09 (1.02-1.15) | 20.77 (19.27-22.14) | 6.91 (5.55-8.62)    | 50.48 (40.61-62.49) | 3.43 (2.76 to 4.11)   |
| Egypt              | 9.72 (6.8-11.83) | 39.39 (27.32-49.32) | 21.98 (12.86-31.56) | 43.93 (26.96-61.79) | 0.54 (0.44 to 0.64)   |
| El Salvador        | 0.62 (0.58-0.67) | 20.12 (18.68-21.65) | 4.08 (3.09-5.23)    | 67.31 (50.85-86.63) | 4.43 (3.7 to 5.16)    |
| Equatorial Guinea  | 0.06 (0.04-0.07) | 29.32 (21.77-37.03) | 0.14 (0.1-0.19)     | 32.78 (23.73-43.75) | 0.54 (0.39 to 0.69)   |
| Eritrea            | 0.25 (0.17-0.34) | 24.73 (15.94-35.35) | 0.66 (0.45-0.92)    | 27.87 (19.48-38.08) | 0.3 (0.14 to 0.46)    |
| Estonia            | 0.05 (0.05-0.06) | 2.72 (2.52-2.94)    | 0.35 (0.28-0.43)    | 11.33 (9.07-13.93)  | 5.36 (4.91 to 5.81)   |
| Eswatini           | 0.1 (0.08-0.13)  | 37.13 (29.77-45.05) | 0.27 (0.19-0.36)    | 51.29 (37.88-66.11) | 1.28 (0.67 to 1.89)   |
| Ethiopia           | 7.86 (6.41-9.38) | 39.59 (32.49-46.12) | 9.86 (8.58-11.29)   | 26.17 (22.48-30.08) | -1.62 (-1.7 to -1.55) |
| Fiji               | 0.12 (0.09-0.14) | 34.34 (28.19-43.41) | 0.29 (0.23-0.37)    | 46.74 (37.81-57.1)  | 0.55 (0.17 to 0.93)   |

|           |                  |                     |                     |                     |                        |
|-----------|------------------|---------------------|---------------------|---------------------|------------------------|
| Finland   | 0.21 (0.2-0.23)  | 3.08 (2.8-3.3)      | 0.71 (0.59-0.79)    | 4.69 (4.01-5.26)    | 2.13 (1.9 to 2.37)     |
| France    | 7.12 (6.35-7.72) | 7.99 (7.12-8.64)    | 12.7 (10.29-14.62)  | 6.59 (5.48-7.46)    | -0.39 (-0.52 to -0.26) |
| Gabon     | 0.18 (0.13-0.23) | 35.51 (25.47-44.37) | 0.37 (0.23-0.48)    | 41.2 (25.46-53.69)  | 0.46 (0.25 to 0.67)    |
| Gambia    | 0.11 (0.08-0.14) | 31.8 (25.23-39.71)  | 0.31 (0.24-0.39)    | 33.3 (27.05-40.97)  | 0.1 (-0.01 to 0.22)    |
| Georgia   | 0.35 (0.31-0.39) | 6.2 (5.54-6.88)     | 0.71 (0.59-0.82)    | 11.89 (9.98-13.83)  | 3.59 (2.83 to 4.35)    |
| Germany   | 9.35 (8.69-9.9)  | 7.04 (6.55-7.43)    | 35.22 (30.38-39.03) | 14.7 (12.69-16.19)  | 3.54 (3.2 to 3.89)     |
| Ghana     | 1.66 (1.25-2.22) | 27.97 (21.27-36.97) | 4.68 (3.38-5.96)    | 31.79 (23.14-39.85) | 0.55 (0.44 to 0.66)    |
| Greece    | 2.95 (2.71-3.17) | 20.63 (18.81-22.08) | 4.6 (4.02-5.09)     | 14.96 (13.36-16.41) | -1.62 (-2.08 to -1.16) |
| Greenland | 0 (0-0)          | 13.2 (11.48-15.22)  | 0.01 (0.01-0.01)    | 13.87 (11.51-16.31) | 0.22 (0.11 to 0.34)    |
| Grenada   | 0.03 (0.02-0.03) | 34.89 (31.52-38.34) | 0.05 (0.04-0.06)    | 47.49 (41.83-52.74) | 1.47 (1.3 to 1.64)     |
| Guam      | 0.01 (0.01-0.02) | 24.88 (21.94-27.8)  | 0.06 (0.05-0.07)    | 29.97 (25.2-35.61)  | 0.9 (0.61 to 1.19)     |
| Guatemala | 1.14 (1.02-1.27) | 32.23 (28.9-35.79)  | 6.02 (4.81-7.5)     | 57.06 (46.4-70.3)   | 2.65 (2.29 to 3.01)    |
| Guinea    | 1.25 (1.01-1.59) | 37.28 (30.01-47.69) | 1.93 (1.51-2.42)    | 34.24 (27.19-42.48) | -0.1 (-0.17 to -0.02)  |

|                            |                      |                     |                        |                     |                        |
|----------------------------|----------------------|---------------------|------------------------|---------------------|------------------------|
| Guinea-Bissau              | 0.21 (0.17-0.27)     | 50.78 (40.95-61.44) | 0.29 (0.23-0.36)       | 40.52 (32.1-49.72)  | -0.74 (-0.78 to -0.7)  |
| Guyana                     | 0.11 (0.1-0.13)      | 29.17 (25.4-33.04)  | 0.28 (0.22-0.36)       | 47.17 (37.07-58.98) | 2.38 (2.15 to 2.61)    |
| Haiti                      | 1.18 (0.91-1.64)     | 34.39 (26-50.81)    | 2.37 (1.67-3.61)       | 34.33 (24.49-52.97) | 0.32 (0.18 to 0.47)    |
| Honduras                   | 0.56 (0.45-0.78)     | 26.05 (20.21-38.44) | 3.16 (2.57-4.03)       | 55.87 (45.6-71.19)  | 3.09 (2.81 to 3.37)    |
| Hungary                    | 0.78 (0.74-0.82)     | 5.84 (5.51-6.11)    | 1.82 (1.52-2.17)       | 8.92 (7.43-10.6)    | 2.57 (2.18 to 2.97)    |
| Iceland                    | 0.01 (0.01-0.01)     | 4.19 (3.74-4.58)    | 0.03 (0.03-0.04)       | 4.98 (4.14-5.69)    | 0.89 (0.75 to 1.03)    |
| India                      | 92.81 (79.36-104.72) | 22.76 (19.35-25.79) | 222.92 (191.55-258.59) | 20.92 (17.98-24.08) | -0.55 (-0.77 to -0.33) |
| Indonesia                  | 22.38 (20.04-24.93)  | 21.08 (18.79-23.69) | 42.13 (35.88-48.3)     | 20.95 (17.92-23.36) | 0 (-0.13 to 0.12)      |
| Iran (Islamic Republic of) | 5.27 (4.82-5.77)     | 24.11 (21.79-28.8)  | 12.55 (11.38-13.41)    | 19.77 (17.77-21.21) | -0.89 (-0.98 to -0.79) |
| Iraq                       | 3.46 (2.82-4.48)     | 46.27 (37.12-61.87) | 7.89 (6.16-10.08)      | 41.86 (33.19-53.49) | -0.42 (-0.48 to -0.35) |
| Ireland                    | 0.42 (0.39-0.44)     | 10.95 (10.02-11.65) | 0.7 (0.59-0.79)        | 8.89 (7.57-9.94)    | -0.71 (-0.79 to -0.64) |
| Israel                     | 0.96 (0.88-1.02)     | 21.9 (19.96-23.41)  | 2.76 (2.37-3.06)       | 21.48 (18.66-23.71) | 0.28 (-0.04 to 0.6)    |
| Italy                      | 8.39 (7.89-8.68)     | 9.78 (9.09-10.16)   | 16.51 (13.88-18.05)    | 8.6 (7.37-9.33)     | -0.17 (-0.31 to -0.04) |

|                                  |                     |                     |                     |                     |                        |
|----------------------------------|---------------------|---------------------|---------------------|---------------------|------------------------|
| Ivory Coast                      | 1.57 (1.27-1.87)    | 40.34 (33.8-47.23)  | 3.43 (2.59-4.33)    | 34.73 (28.03-42.22) | -0.61 (-0.73 to -0.49) |
| Jamaica                          | 0.43 (0.39-0.46)    | 23.34 (21.34-24.93) | 0.94 (0.76-1.15)    | 30.23 (24.24-37.39) | 0.3 (-0.21 to 0.82)    |
| Japan                            | 19.48 (17.92-20.33) | 12.85 (11.7-13.48)  | 45.32 (35.35-51.15) | 8.87 (7.24-9.83)    | -1.44 (-1.54 to -1.34) |
| Jordan                           | 0.44 (0.37-0.51)    | 40.92 (34.47-48.38) | 1.81 (1.52-2.15)    | 36.65 (30.74-43.21) | -0.28 (-0.4 to -0.15)  |
| Kazakhstan                       | 0.97 (0.91-1.05)    | 7.34 (6.89-7.89)    | 1.87 (1.64-2.13)    | 11.79 (10.31-13.3)  | 1.12 (0.79 to 1.45)    |
| Kenya                            | 1.62 (1.36-1.94)    | 20.91 (17.39-25.31) | 4.76 (3.99-5.64)    | 25.35 (21.47-29.6)  | 0.75 (0.67 to 0.82)    |
| Kiribati                         | 0.02 (0.01-0.02)    | 44.1 (36.16-52.87)  | 0.04 (0.03-0.05)    | 56.87 (43.53-72.81) | 0.6 (0.19 to 1.02)     |
| Kuwait                           | 0.14 (0.12-0.15)    | 27.67 (23.81-30.52) | 0.32 (0.27-0.39)    | 16.18 (13.28-19.5)  | -2.21 (-2.93 to -1.48) |
| Kyrgyzstan                       | 0.43 (0.39-0.47)    | 12.46 (11.34-13.65) | 0.49 (0.42-0.56)    | 9.8 (8.54-11.16)    | -1.37 (-1.82 to -0.93) |
| Lao People's Democratic Republic | 1.08 (0.85-1.35)    | 50.84 (39.68-64.92) | 1.71 (1.31-2.18)    | 41.81 (32.97-51.98) | -0.85 (-0.92 to -0.78) |
| Latvia                           | 0.08 (0.07-0.08)    | 2.33 (2.17-2.5)     | 0.26 (0.22-0.32)    | 6.22 (5.25-7.5)     | 4.52 (4 to 5.05)       |
| Lebanon                          | 0.62 (0.52-0.75)    | 32.44 (27.01-39.57) | 1.18 (0.85-1.53)    | 23.32 (16.78-30.26) | -1.11 (-1.25 to -0.97) |
| Lesotho                          | 0.22 (0.18-0.28)    | 24.49 (20.02-29.91) | 0.56 (0.4-0.73)     | 49.32 (35.95-62.73) | 3.04 (2.73 to 3.35)    |

|                  |                  |                     |                  |                     |                        |
|------------------|------------------|---------------------|------------------|---------------------|------------------------|
| Liberia          | 0.45 (0.37-0.55) | 41.82 (35.14-51.43) | 0.65 (0.47-0.9)  | 33.14 (25.24-45.08) | -0.58 (-0.85 to -0.32) |
| Libya            | 0.52 (0.4-0.66)  | 29.75 (22.44-39.08) | 1.37 (0.92-1.86) | 30.37 (20.49-41.27) | 0.33 (0.15 to 0.5)     |
| Lithuania        | 0.12 (0.11-0.12) | 2.66 (2.46-2.84)    | 0.26 (0.22-0.31) | 4.37 (3.64-5.24)    | 1.2 (0.62 to 1.78)     |
| Luxembourg       | 0.05 (0.05-0.06) | 10.12 (9.11-10.94)  | 0.12 (0.1-0.14)  | 10.19 (8.48-11.88)  | 0.23 (0.02 to 0.44)    |
| Madagascar       | 1.2 (0.94-1.49)  | 22.91 (17.82-29.06) | 1.94 (1.49-2.54) | 20.34 (15.74-26.54) | -0.49 (-0.56 to -0.42) |
| Malawi           | 1.04 (0.83-1.21) | 27.48 (23.76-31.57) | 1.78 (1.46-2.15) | 26.24 (21.93-31.13) | -0.28 (-0.42 to -0.14) |
| Malaysia         | 2.18 (2.01-2.37) | 24.78 (22.57-27.13) | 6.11 (4.87-7.45) | 25.56 (20.44-31)    | -0.47 (-0.73 to -0.22) |
| Maldives         | 0.04 (0.04-0.05) | 57.41 (49.94-68.83) | 0.09 (0.07-0.1)  | 33.8 (27.82-39.77)  | -2.22 (-2.46 to -1.97) |
| Mali             | 1.52 (1.21-1.91) | 37.05 (29.91-46.42) | 2.7 (2.07-3.46)  | 31.19 (25-38.82)    | -0.45 (-0.61 to -0.29) |
| Malta            | 0.05 (0.05-0.06) | 13.49 (12.13-14.67) | 0.11 (0.09-0.12) | 10.34 (8.85-11.81)  | -0.93 (-1.14 to -0.72) |
| Marshall Islands | 0.01 (0.01-0.01) | 39.58 (31.44-51.85) | 0.02 (0.01-0.02) | 53.39 (39.7-72.05)  | 1.04 (0.78 to 1.3)     |
| Mauritania       | 0.45 (0.38-0.53) | 47.02 (39-55.12)    | 0.59 (0.44-0.76) | 30.91 (23.68-38.57) | -1.45 (-1.52 to -1.37) |
| Mauritius        | 0.31 (0.29-0.33) | 44.68 (41.91-47.57) | 1.26 (1.03-1.53) | 75.03 (61.8-90.76)  | 2.09 (1.74 to 2.45)    |

|                                  |                     |                     |                    |                     |                        |
|----------------------------------|---------------------|---------------------|--------------------|---------------------|------------------------|
| Mexico                           | 12.18 (11.63-12.52) | 30.65 (28.76-31.74) | 72.54 (62.59-82.5) | 63.67 (55.02-72.25) | 2.85 (2.43 to 3.27)    |
| Micronesia (Federated States of) | 0.02 (0.02-0.03)    | 49.5 (39.15-64.24)  | 0.05 (0.03-0.06)   | 77.21 (57.56-97.54) | 1.45 (1.05 to 1.84)    |
| Monaco                           | 0 (0-0)             | 4.16 (3.41-4.99)    | 0.01 (0.01-0.01)   | 6.28 (5.16-7.39)    | 1.83 (1.41 to 2.26)    |
| Mongolia                         | 0.39 (0.33-0.46)    | 35.49 (30.53-41)    | 0.39 (0.31-0.5)    | 17.81 (14.41-22.12) | -3.6 (-4.07 to -3.12)  |
| Montenegro                       | 0.07 (0.07-0.08)    | 12.43 (11.17-13.87) | 0.13 (0.11-0.15)   | 13.82 (11.6-16.13)  | 0.55 (0.38 to 0.72)    |
| Morocco                          | 3.55 (3.03-4.63)    | 29.43 (24.56-41.35) | 9.32 (7.16-11.84)  | 35.84 (27.87-46.25) | 0.76 (0.62 to 0.89)    |
| Mozambique                       | 1.24 (1.02-1.52)    | 22.84 (18.92-28.33) | 2.64 (2.08-3.28)   | 25.87 (21.06-32.1)  | 0.5 (0.37 to 0.63)     |
| Myanmar                          | 7.64 (5.94-9.5)     | 30.76 (24.01-38.16) | 11.55 (9.73-13.96) | 26.84 (23.21-32.3)  | -0.53 (-0.65 to -0.41) |
| Namibia                          | 0.18 (0.13-0.24)    | 27.85 (20.88-37.4)  | 0.35 (0.25-0.49)   | 27.4 (20-38.41)     | -0.39 (-0.75 to -0.02) |
| Nauru                            | 0 (0-0)             | 49.17 (38.1-60.09)  | 0 (0-0)            | 66.61 (49.13-82.46) | 0.93 (0.61 to 1.25)    |
| Nepal                            | 1.73 (1.27-2.25)    | 18.15 (13.34-24.47) | 5.11 (3.58-6.71)   | 25.06 (17.71-32.79) | 1.23 (0.94 to 1.53)    |
| Netherlands                      | 1.68 (1.48-1.82)    | 8.42 (7.37-9.15)    | 3.78 (3.23-4.22)   | 9.8 (8.42-10.92)    | 0.67 (0.59 to 0.75)    |
| New Zealand                      | 0.31 (0.28-0.33)    | 8.26 (7.56-8.83)    | 0.91 (0.79-1)      | 10.82 (9.52-11.82)  | 1.04 (0.82 to 1.27)    |

|                          |                     |                     |                     |                     |                       |
|--------------------------|---------------------|---------------------|---------------------|---------------------|-----------------------|
| Nicaragua                | 0.61 (0.57-0.65)    | 37.62 (34.76-40.75) | 3.48 (2.87-4.09)    | 83.24 (69.57-96.75) | 3.14 (2.79 to 3.49)   |
| Niger                    | 1.07 (0.84-1.35)    | 35.2 (27.55-44.12)  | 2.2 (1.61-2.91)     | 28.69 (22.39-36.04) | -0.66 (-0.73 to -0.6) |
| Nigeria                  | 11.66 (9.42-14.85)  | 27.69 (22.51-35.07) | 20.04 (15.89-25.09) | 24.84 (20.27-30.37) | -0.3 (-0.36 to -0.23) |
| Niue                     | 0 (0-0)             | 35.72 (28.03-44.02) | 0 (0-0)             | 47.39 (34.47-59.33) | 0.85 (0.59 to 1.12)   |
| North Macedonia          | 0.19 (0.18-0.22)    | 11.25 (10.27-12.72) | 0.36 (0.29-0.45)    | 12.72 (10.34-15.66) | 0.3 (0.07 to 0.54)    |
| Northern Mariana Islands | 0.01 (0.01-0.01)    | 45.65 (39.08-54.81) | 0.02 (0.02-0.03)    | 56.84 (48.66-65.02) | 0.95 (0.85 to 1.06)   |
| Norway                   | 0.34 (0.31-0.36)    | 4.55 (4.2-4.77)     | 0.78 (0.67-0.84)    | 6.69 (5.84-7.25)    | 1.49 (1.18 to 1.8)    |
| Oman                     | 0.08 (0.06-0.11)    | 16.82 (12.93-22.29) | 0.2 (0.17-0.23)     | 19.85 (17.05-22.82) | 0.98 (0.78 to 1.17)   |
| Pakistan                 | 15.21 (11.34-20.54) | 26.34 (19.51-35.91) | 44.39 (32.45-56.53) | 39.88 (29.74-50.88) | 1.43 (1.17 to 1.7)    |
| Palau                    | 0.01 (0-0.01)       | 54.63 (45.05-68.31) | 0.01 (0.01-0.02)    | 69.74 (56.33-84.64) | 0.79 (0.59 to 1)      |
| Palestine                | 0.39 (0.31-0.48)    | 46.81 (37.83-57.37) | 0.65 (0.55-0.75)    | 33.58 (28.52-38.58) | -0.86 (-1.11 to -0.6) |
| Panama                   | 0.22 (0.2-0.24)     | 14.61 (13.34-15.73) | 1.15 (0.9-1.46)     | 27.39 (21.28-34.63) | 2.25 (1.89 to 2.61)   |
| Papua New Guinea         | 0.25 (0.2-0.31)     | 12.19 (9.8-14.71)   | 0.74 (0.56-0.95)    | 14.36 (11.09-17.95) | 0.51 (0.36 to 0.65)   |



|                       |                    |                     |                     |                     |                        |
|-----------------------|--------------------|---------------------|---------------------|---------------------|------------------------|
| Paraguay              | 0.34 (0.3-0.37)    | 15.41 (13.63-17.13) | 1.88 (1.46-2.4)     | 34.76 (27.05-44.15) | 3.48 (3.24 to 3.71)    |
| Peru                  | 2.92 (2.59-3.3)    | 24.09 (21.15-27.33) | 8.04 (5.92-10.44)   | 24.72 (18.22-32.03) | 0.19 (-0.04 to 0.42)   |
| Philippines           | 10.41 (9.42-11.48) | 38.22 (34.49-42.3)  | 33.36 (27.88-39.55) | 44.7 (37.65-52.35)  | 0.92 (0.66 to 1.18)    |
| Poland                | 4.41 (4.25-4.53)   | 10.66 (10.2-10.95)  | 4.7 (3.97-5.59)     | 6.5 (5.49-7.73)     | -1.96 (-2.39 to -1.53) |
| Portugal              | 1.58 (1.49-1.67)   | 12.57 (11.77-13.3)  | 4.07 (3.45-4.51)    | 13.48 (11.55-14.86) | 0.38 (-0.07 to 0.84)   |
| Puerto Rico           | 0.99 (0.93-1.05)   | 28.44 (26.47-30.11) | 2.06 (1.6-2.59)     | 26.89 (21.12-34.09) | 0.4 (0.08 to 0.72)     |
| Qatar                 | 0.03 (0.02-0.04)   | 48.93 (38.41-84.35) | 0.13 (0.1-0.17)     | 45.88 (37.09-55.98) | 0.07 (-0.19 to 0.33)   |
| Republic of Korea     | 3.12 (2.97-3.33)   | 12.08 (11.28-12.97) | 7.98 (6.93-8.86)    | 9.56 (8.27-10.64)   | -0.56 (-0.65 to -0.47) |
| Republic of Moldova   | 0.1 (0.09-0.11)    | 2.87 (2.67-3.05)    | 0.25 (0.21-0.28)    | 4.46 (3.88-5.03)    | 1.53 (1.2 to 1.85)     |
| Romania               | 2.59 (2.47-2.69)   | 10.43 (9.94-10.84)  | 3.04 (2.55-3.61)    | 7.98 (6.68-9.46)    | -0.52 (-1.04 to 0)     |
| Russian Federation    | 9.02 (8.79-9.32)   | 5.47 (5.29-5.63)    | 11.65 (10.16-13.13) | 5.17 (4.52-5.82)    | -0.89 (-1.21 to -0.57) |
| Rwanda                | 0.93 (0.76-1.1)    | 32.51 (27.17-38.51) | 1.27 (0.99-1.56)    | 24.68 (19.41-29.96) | -1.65 (-1.93 to -1.37) |
| Saint Kitts and Nevis | 0.02 (0.02-0.02)   | 48.81 (44.79-53.28) | 0.03 (0.03-0.04)    | 53.07 (44.4-61.71)  | 0.73 (0.55 to 0.91)    |

|                                  |                  |                     |                  |                     |                        |
|----------------------------------|------------------|---------------------|------------------|---------------------|------------------------|
| Saint Lucia                      | 0.03 (0.02-0.03) | 31.56 (29.14-33.94) | 0.07 (0.06-0.08) | 34.59 (28.97-40.83) | 0.39 (0.16 to 0.62)    |
| Saint Vincent and the Grenadines | 0.02 (0.02-0.02) | 25.51 (23.01-27.92) | 0.05 (0.04-0.05) | 36.54 (31.68-42.06) | 1.55 (1.32 to 1.78)    |
| Samoa                            | 0.03 (0.02-0.04) | 37.95 (30.01-47.78) | 0.06 (0.05-0.08) | 44.6 (36.37-54.81)  | 0.47 (0.26 to 0.68)    |
| San Marino                       | 0 (0-0)          | 4.05 (3.41-4.74)    | 0 (0-0.01)       | 5.09 (3.52-6.82)    | 1.51 (1.24 to 1.77)    |
| Sao Tome and Principe            | 0.03 (0.02-0.03) | 43.51 (36.27-49.57) | 0.05 (0.04-0.06) | 51.3 (40.4-59.87)   | 0.48 (0.36 to 0.6)     |
| Saudi Arabia                     | 2.48 (1.93-3.1)  | 47.9 (37.69-59.35)  | 6.93 (5.45-8.55) | 52.88 (42.82-63.11) | 0.58 (0.35 to 0.81)    |
| Senegal                          | 1.33 (1.04-1.71) | 41.68 (33.28-53.19) | 2.45 (1.89-3.22) | 34.93 (27.7-45.06)  | -0.54 (-0.67 to -0.42) |
| Serbia                           | 1.42 (1.28-1.67) | 14 (12.58-16.3)     | 2.52 (2.05-3)    | 16.34 (13.34-19.38) | 0.83 (0.66 to 1)       |
| Seychelles                       | 0.02 (0.01-0.02) | 29.87 (26.45-33.1)  | 0.04 (0.04-0.05) | 44.43 (38.76-49.83) | 0.9 (0.52 to 1.29)     |
| Sierra Leone                     | 0.64 (0.51-0.79) | 32.65 (26.08-39.62) | 1.04 (0.79-1.33) | 28.55 (22.85-35.84) | -0.28 (-0.36 to -0.2)  |
| Singapore                        | 0.31 (0.29-0.33) | 15.54 (14.57-16.4)  | 0.76 (0.66-0.83) | 10.51 (9.09-11.55)  | -0.38 (-0.94 to 0.18)  |
| Slovakia                         | 0.69 (0.64-0.74) | 11.86 (11.06-12.74) | 0.76 (0.6-0.93)  | 8.42 (6.73-10.33)   | -1.05 (-1.13 to -0.96) |
| Slovenia                         | 0.15 (0.12-0.19) | 6.5 (5.14-8.02)     | 0.26 (0.2-0.33)  | 4.99 (3.91-6.36)    | -0.16 (-0.44 to 0.13)  |

|                            |                  |                     |                     |                     |                        |
|----------------------------|------------------|---------------------|---------------------|---------------------|------------------------|
| Solomon Islands            | 0.07 (0.05-0.09) | 41.92 (31.97-57.06) | 0.09 (0.07-0.11)    | 25.15 (20.72-29.99) | -1.94 (-2.35 to -1.53) |
| Somalia                    | 0.76 (0.57-0.96) | 31.28 (23.57-39.61) | 1.88 (1.43-2.5)     | 29.63 (22.61-39.38) | -0.06 (-0.11 to -0.01) |
| South Africa               | 4.61 (4.25-5.07) | 22 (20.07-24.29)    | 12.35 (11.41-13.22) | 31.02 (28.44-33.22) | 1.29 (0.9 to 1.68)     |
| South Sudan                | 0.65 (0.48-0.83) | 27.62 (20.27-35.67) | 0.93 (0.69-1.25)    | 27.22 (20.38-35.97) | -0.06 (-0.09 to -0.02) |
| Spain                      | 7.68 (6.91-8.29) | 14.79 (13.28-15.99) | 14.65 (12.08-16.74) | 11.06 (9.33-12.49)  | -0.87 (-0.94 to -0.8)  |
| Sri Lanka                  | 2.49 (2.21-2.74) | 25.27 (22.31-27.99) | 5.56 (4.15-7.26)    | 24.09 (18.08-31.21) | -0.11 (-0.51 to 0.28)  |
| Sudan                      | 2.61 (2.06-3.46) | 28.53 (22.13-40.32) | 4.75 (3.37-7.17)    | 28.39 (20.33-44.3)  | 0.05 (-0.04 to 0.14)   |
| Suriname                   | 0.07 (0.07-0.08) | 28.55 (25.56-30.97) | 0.26 (0.22-0.31)    | 45.34 (37.97-53.46) | 1.67 (1.38 to 1.96)    |
| Sweden                     | 0.65 (0.59-0.69) | 3.93 (3.59-4.17)    | 2 (1.68-2.21)       | 7.5 (6.43-8.23)     | 2.55 (2.42 to 2.67)    |
| Switzerland                | 0.61 (0.54-0.66) | 5.43 (4.84-5.87)    | 2.22 (1.82-2.52)    | 9.49 (7.91-10.75)   | 2.76 (2.5 to 3.03)     |
| Syrian Arab Republic       | 1.95 (1.61-2.37) | 36.99 (30.44-46.13) | 2.66 (2.07-3.42)    | 27.78 (22.07-34.58) | -1.65 (-1.95 to -1.34) |
| Taiwan (Province of China) | 3.33 (3.14-3.53) | 26.1 (24.33-27.84)  | 8.25 (6.51-10.33)   | 20.47 (16.14-25.73) | -0.94 (-1.1 to -0.79)  |
| Tajikistan                 | 0.1 (0.1-0.11)   | 3.18 (2.94-3.47)    | 0.4 (0.33-0.49)     | 9.4 (7.8-11.25)     | 4.07 (3.7 to 4.45)     |

|                      |                    |                     |                     |                     |                        |
|----------------------|--------------------|---------------------|---------------------|---------------------|------------------------|
| Thailand             | 9.77 (8.63-11.15)  | 29.2 (25.83-33.3)   | 27.45 (21.01-35.47) | 27.94 (21.36-35.99) | -0.38 (-0.48 to -0.28) |
| Timor-Leste          | 0.09 (0.07-0.12)   | 31.54 (24.73-42.46) | 0.23 (0.17-0.3)     | 31.3 (24.09-39.75)  | -0.04 (-0.24 to 0.15)  |
| Togo                 | 0.43 (0.35-0.54)   | 34.23 (28.17-42.73) | 1 (0.79-1.27)       | 30.2 (24.51-37.23)  | -0.43 (-0.47 to -0.39) |
| Tokelau              | 0 (0-0)            | 32.9 (25.7-42.75)   | 0 (0-0)             | 40.42 (31.37-54.02) | 0.67 (0.44 to 0.9)     |
| Tonga                | 0.01 (0.01-0.02)   | 28.56 (23.31-37.54) | 0.03 (0.03-0.04)    | 41.51 (33.11-54.56) | 1.25 (0.87 to 1.63)    |
| Trinidad and Tobago  | 0.18 (0.16-0.19)   | 21.8 (20.39-23.17)  | 0.62 (0.46-0.8)     | 34.37 (25.88-44.38) | 2 (1.76 to 2.25)       |
| Tunisia              | 1.03 (0.88-1.23)   | 24.28 (20.58-29.37) | 2.63 (1.88-3.49)    | 23.62 (16.87-31.07) | -0.12 (-0.16 to -0.09) |
| Turkey               | 11.61 (9.54-15.85) | 35.19 (28.26-50.25) | 19.19 (15.49-23.48) | 23.48 (18.99-28.71) | -1.28 (-1.59 to -0.97) |
| Turkmenistan         | 0.31 (0.29-0.33)   | 13.45 (12.55-14.37) | 0.71 (0.58-0.9)     | 17.38 (14.16-21.64) | 0.34 (0.03 to 0.65)    |
| Tuvalu               | 0 (0-0)            | 38.58 (30.62-49.14) | 0 (0-0.01)          | 48.67 (35.96-66.59) | 0.78 (0.56 to 0.99)    |
| Uganda               | 1.55 (1.2-1.94)    | 25.22 (19.55-31.82) | 3.39 (2.62-4.26)    | 25.81 (20.58-31.71) | -0.19 (-0.32 to -0.05) |
| Ukraine              | 1.41 (1.34-1.47)   | 2.29 (2.15-2.39)    | 2.66 (2.28-3.07)    | 3.86 (3.31-4.47)    | 2.18 (1.89 to 2.47)    |
| United Arab Emirates | 0.21 (0.16-0.26)   | 61.23 (37.47-75.7)  | 1.43 (0.91-2.26)    | 48.09 (29.07-73.62) | -0.82 (-1.4 to -0.24)  |

|                                    |                    |                     |                       |                     |                        |
|------------------------------------|--------------------|---------------------|-----------------------|---------------------|------------------------|
| United Kingdom                     | 4.97 (4.64-5.15)   | 5.41 (5.03-5.63)    | 7.78 (6.85-8.33)      | 5.29 (4.7-5.64)     | 0.38 (0.12 to 0.64)    |
| United Republic of Tanzania        | 2.75 (2.31-3.27)   | 26.7 (22.58-32.2)   | 6.23 (5.26-7.36)      | 27.3 (23.17-31.68)  | 0.13 (0.05 to 0.2)     |
| United States of America           | 33.1 (30.49-34.45) | 9.94 (9.18-10.34)   | 106.95 (95.86-114.38) | 17.77 (16.12-18.91) | 2.43 (2.22 to 2.63)    |
| United States Virgin Islands       | 0.02 (0.01-0.02)   | 21.34 (18.16-24.86) | 0.05 (0.04-0.06)      | 30.18 (25.88-34.3)  | 1.76 (1.53 to 1.99)    |
| Uruguay                            | 0.51 (0.47-0.54)   | 13.21 (12.24-14.02) | 0.99 (0.87-1.09)      | 15.9 (14.15-17.4)   | 0.94 (0.8 to 1.09)     |
| Uzbekistan                         | 1.89 (1.64-2.52)   | 14.76 (12.61-20.49) | 3.97 (3.33-4.67)      | 19.85 (17.05-22.89) | 0.69 (-0.1 to 1.5)     |
| Vanuatu                            | 0.02 (0.01-0.02)   | 26.09 (18.67-35.84) | 0.07 (0.05-0.09)      | 43.38 (32.55-57.97) | 1.91 (1.78 to 2.04)    |
| Venezuela (Bolivarian Republic of) | 1.55 (1.46-1.64)   | 16.19 (15.07-17.25) | 10.41 (7.89-13.43)    | 36.77 (27.88-47.38) | 2.43 (1.94 to 2.92)    |
| Viet Nam                           | 11.03 (8.95-13.56) | 29.05 (23.77-35.4)  | 21.48 (16.68-25.81)   | 26.62 (20.89-31.76) | -0.38 (-0.85 to 0.09)  |
| Yemen                              | 1.15 (0.86-1.54)   | 24.8 (18.61-34.23)  | 2.68 (2.05-3.54)      | 23.19 (18.02-30.53) | -0.26 (-0.33 to -0.18) |
| Zambia                             | 0.95 (0.81-1.11)   | 32.83 (27.31-38.79) | 1.93 (1.55-2.4)       | 30.81 (25.1-37.46)  | -0.48 (-0.66 to -0.3)  |
| Zimbabwe                           | 0.92 (0.7-1.36)    | 25.95 (20.13-37.57) | 2.29 (1.66-3.38)      | 37.07 (27.36-55.38) | 1.55 (1.21 to 1.89)    |

**Supplemental table 5. Death cases ratio between females to males and age-standardized death rate (ASDR) ratio between females to males in 21 geographic regions from 1990 to 2019 in 21 regions.**

| location             | year | Ratio of female to male death cases | Ratio of female ASDR to male ASDR |
|----------------------|------|-------------------------------------|-----------------------------------|
| Andean Latin America | 1990 | 0.942869                            | 0.890741                          |
| Andean Latin America | 1991 | 0.989165                            | 0.932389                          |
| Andean Latin America | 1992 | 1.02563                             | 0.967065                          |
| Andean Latin America | 1993 | 1.016962                            | 0.958297                          |
| Andean Latin America | 1994 | 1.061313                            | 1.001181                          |
| Andean Latin America | 1995 | 1.077537                            | 1.019983                          |
| Andean Latin America | 1996 | 1.032404                            | 0.980159                          |
| Andean Latin America | 1997 | 1.030348                            | 0.978622                          |
| Andean Latin America | 1998 | 1.022574                            | 0.969425                          |
| Andean Latin America | 1999 | 0.992515                            | 0.940177                          |

|                      |      |          |          |
|----------------------|------|----------|----------|
| Andean Latin America | 2000 | 0.997206 | 0.943015 |
| Andean Latin America | 2001 | 0.947616 | 0.894712 |
| Andean Latin America | 2002 | 0.990555 | 0.931385 |
| Andean Latin America | 2003 | 1.019051 | 0.956351 |
| Andean Latin America | 2004 | 0.985019 | 0.922183 |
| Andean Latin America | 2005 | 0.978694 | 0.912562 |
| Andean Latin America | 2006 | 0.961884 | 0.892727 |
| Andean Latin America | 2007 | 0.945709 | 0.874394 |
| Andean Latin America | 2008 | 0.952065 | 0.876611 |
| Andean Latin America | 2009 | 0.97062  | 0.890118 |
| Andean Latin America | 2010 | 0.975539 | 0.890804 |
| Andean Latin America | 2011 | 0.970379 | 0.882799 |
| Andean Latin America | 2012 | 1.010809 | 0.91578  |

|                      |      |          |          |
|----------------------|------|----------|----------|
| Andean Latin America | 2013 | 1.013769 | 0.915689 |
| Andean Latin America | 2014 | 1.008176 | 0.908392 |
| Andean Latin America | 2015 | 1.003827 | 0.902681 |
| Andean Latin America | 2016 | 1.013695 | 0.90961  |
| Andean Latin America | 2017 | 1.021095 | 0.915073 |
| Andean Latin America | 2018 | 1.028281 | 0.920944 |
| Andean Latin America | 2019 | 1.042441 | 0.933531 |
| Australasia          | 1990 | 1.256436 | 0.749952 |
| Australasia          | 1991 | 1.251345 | 0.749596 |
| Australasia          | 1992 | 1.221065 | 0.731598 |
| Australasia          | 1993 | 1.197424 | 0.715706 |
| Australasia          | 1994 | 1.184041 | 0.705074 |
| Australasia          | 1995 | 1.189314 | 0.708414 |



|             |      |          |          |
|-------------|------|----------|----------|
| Australasia | 1996 | 1.171815 | 0.699034 |
| Australasia | 1997 | 1.154972 | 0.694376 |
| Australasia | 1998 | 1.125176 | 0.679026 |
| Australasia | 1999 | 1.123    | 0.679313 |
| Australasia | 2000 | 1.107004 | 0.67342  |
| Australasia | 2001 | 1.092594 | 0.667626 |
| Australasia | 2002 | 1.09213  | 0.668502 |
| Australasia | 2003 | 1.073556 | 0.660159 |
| Australasia | 2004 | 1.093004 | 0.674235 |
| Australasia | 2005 | 1.109953 | 0.687767 |
| Australasia | 2006 | 1.11501  | 0.694533 |
| Australasia | 2007 | 1.119263 | 0.702944 |
| Australasia | 2008 | 1.12093  | 0.709291 |

|             |      |          |          |
|-------------|------|----------|----------|
| Australasia | 2009 | 1.12578  | 0.717931 |
| Australasia | 2010 | 1.119825 | 0.719347 |
| Australasia | 2011 | 1.110324 | 0.720219 |
| Australasia | 2012 | 1.102299 | 0.723081 |
| Australasia | 2013 | 1.092797 | 0.725804 |
| Australasia | 2014 | 1.087757 | 0.72868  |
| Australasia | 2015 | 1.082458 | 0.732461 |
| Australasia | 2016 | 1.075631 | 0.733734 |
| Australasia | 2017 | 1.056633 | 0.72804  |
| Australasia | 2018 | 1.040454 | 0.72481  |
| Australasia | 2019 | 1.025964 | 0.721186 |
| Caribbean   | 1990 | 0.778203 | 0.705687 |
| Caribbean   | 1991 | 0.789518 | 0.714482 |

|           |      |          |          |
|-----------|------|----------|----------|
| Caribbean | 1992 | 0.790374 | 0.71231  |
| Caribbean | 1993 | 0.795133 | 0.714068 |
| Caribbean | 1994 | 0.794694 | 0.711298 |
| Caribbean | 1995 | 0.795712 | 0.709507 |
| Caribbean | 1996 | 0.799616 | 0.710759 |
| Caribbean | 1997 | 0.797003 | 0.706666 |
| Caribbean | 1998 | 0.795225 | 0.702657 |
| Caribbean | 1999 | 0.806613 | 0.710478 |
| Caribbean | 2000 | 0.84186  | 0.739455 |
| Caribbean | 2001 | 0.85681  | 0.751266 |
| Caribbean | 2002 | 0.865068 | 0.757623 |
| Caribbean | 2003 | 0.877107 | 0.766409 |
| Caribbean | 2004 | 0.894996 | 0.780393 |

|           |      |          |          |
|-----------|------|----------|----------|
| Caribbean | 2005 | 0.901407 | 0.785161 |
| Caribbean | 2006 | 0.90325  | 0.786336 |
| Caribbean | 2007 | 0.896328 | 0.779649 |
| Caribbean | 2008 | 0.888385 | 0.771347 |
| Caribbean | 2009 | 0.877739 | 0.760608 |
| Caribbean | 2010 | 0.902529 | 0.780843 |
| Caribbean | 2011 | 0.894764 | 0.774198 |
| Caribbean | 2012 | 0.897262 | 0.776873 |
| Caribbean | 2013 | 0.897109 | 0.776448 |
| Caribbean | 2014 | 0.895273 | 0.774364 |
| Caribbean | 2015 | 0.890096 | 0.769517 |
| Caribbean | 2016 | 0.888374 | 0.767038 |
| Caribbean | 2017 | 0.887092 | 0.764536 |

|              |      |          |          |
|--------------|------|----------|----------|
| Caribbean    | 2018 | 0.894349 | 0.768945 |
| Caribbean    | 2019 | 0.900884 | 0.773334 |
| Central Asia | 1990 | 0.993776 | 0.730286 |
| Central Asia | 1991 | 0.991773 | 0.731194 |
| Central Asia | 1992 | 0.989487 | 0.735739 |
| Central Asia | 1993 | 0.982871 | 0.732542 |
| Central Asia | 1994 | 0.967481 | 0.724436 |
| Central Asia | 1995 | 0.953222 | 0.716344 |
| Central Asia | 1996 | 0.932845 | 0.703873 |
| Central Asia | 1997 | 0.939018 | 0.708663 |
| Central Asia | 1998 | 0.942864 | 0.711008 |
| Central Asia | 1999 | 0.93285  | 0.706787 |
| Central Asia | 2000 | 0.914752 | 0.697569 |

|              |      |          |          |
|--------------|------|----------|----------|
| Central Asia | 2001 | 0.90155  | 0.688619 |
| Central Asia | 2002 | 0.889552 | 0.67599  |
| Central Asia | 2003 | 0.880783 | 0.667315 |
| Central Asia | 2004 | 0.876683 | 0.667546 |
| Central Asia | 2005 | 0.878457 | 0.676155 |
| Central Asia | 2006 | 0.867182 | 0.670221 |
| Central Asia | 2007 | 0.861093 | 0.665534 |
| Central Asia | 2008 | 0.858393 | 0.661361 |
| Central Asia | 2009 | 0.865353 | 0.664304 |
| Central Asia | 2010 | 0.870146 | 0.66312  |
| Central Asia | 2011 | 0.864532 | 0.659123 |
| Central Asia | 2012 | 0.866978 | 0.660768 |
| Central Asia | 2013 | 0.863849 | 0.658662 |

|                |      |          |          |
|----------------|------|----------|----------|
| Central Asia   | 2014 | 0.851903 | 0.644534 |
| Central Asia   | 2015 | 0.851577 | 0.639005 |
| Central Asia   | 2016 | 0.849903 | 0.637999 |
| Central Asia   | 2017 | 0.850543 | 0.637766 |
| Central Asia   | 2018 | 0.846082 | 0.636936 |
| Central Asia   | 2019 | 0.848602 | 0.64247  |
| Central Europe | 1990 | 0.955491 | 0.661719 |
| Central Europe | 1991 | 0.961364 | 0.663657 |
| Central Europe | 1992 | 0.957234 | 0.658579 |
| Central Europe | 1993 | 0.965166 | 0.660903 |
| Central Europe | 1994 | 0.966613 | 0.660389 |
| Central Europe | 1995 | 0.971466 | 0.661423 |
| Central Europe | 1996 | 0.979487 | 0.662808 |

|                |      |          |          |
|----------------|------|----------|----------|
| Central Europe | 1997 | 0.989711 | 0.667123 |
| Central Europe | 1998 | 0.99268  | 0.662612 |
| Central Europe | 1999 | 1.007421 | 0.665519 |
| Central Europe | 2000 | 1.009404 | 0.66032  |
| Central Europe | 2001 | 1.001136 | 0.650922 |
| Central Europe | 2002 | 0.99002  | 0.639423 |
| Central Europe | 2003 | 0.985822 | 0.633371 |
| Central Europe | 2004 | 0.987337 | 0.630977 |
| Central Europe | 2005 | 0.996463 | 0.635996 |
| Central Europe | 2006 | 1.012738 | 0.645361 |
| Central Europe | 2007 | 1.033613 | 0.65755  |
| Central Europe | 2008 | 1.022364 | 0.649222 |
| Central Europe | 2009 | 1.028734 | 0.651344 |



|                       |      |          |          |
|-----------------------|------|----------|----------|
| Central Europe        | 2010 | 1.028359 | 0.649302 |
| Central Europe        | 2011 | 1.026432 | 0.646255 |
| Central Europe        | 2012 | 1.039093 | 0.651483 |
| Central Europe        | 2013 | 1.047601 | 0.653682 |
| Central Europe        | 2014 | 1.058371 | 0.659537 |
| Central Europe        | 2015 | 1.069497 | 0.665303 |
| Central Europe        | 2016 | 1.065577 | 0.663071 |
| Central Europe        | 2017 | 1.059955 | 0.660605 |
| Central Europe        | 2018 | 1.058167 | 0.660511 |
| Central Europe        | 2019 | 1.056385 | 0.660778 |
| Central Latin America | 1990 | 0.977794 | 0.906047 |
| Central Latin America | 1991 | 0.960958 | 0.88965  |
| Central Latin America | 1992 | 0.96836  | 0.891993 |

|                       |      |          |          |
|-----------------------|------|----------|----------|
| Central Latin America | 1993 | 0.96676  | 0.885486 |
| Central Latin America | 1994 | 0.960737 | 0.875372 |
| Central Latin America | 1995 | 0.974102 | 0.885237 |
| Central Latin America | 1996 | 0.980331 | 0.887809 |
| Central Latin America | 1997 | 0.986228 | 0.890212 |
| Central Latin America | 1998 | 0.984161 | 0.884764 |
| Central Latin America | 1999 | 0.993865 | 0.890436 |
| Central Latin America | 2000 | 0.974373 | 0.871688 |
| Central Latin America | 2001 | 0.977773 | 0.871958 |
| Central Latin America | 2002 | 0.955348 | 0.848128 |
| Central Latin America | 2003 | 0.953418 | 0.84444  |
| Central Latin America | 2004 | 0.949965 | 0.839949 |
| Central Latin America | 2005 | 0.94173  | 0.832021 |

|                       |      |          |          |
|-----------------------|------|----------|----------|
| Central Latin America | 2006 | 0.929669 | 0.819435 |
| Central Latin America | 2007 | 0.928761 | 0.817536 |
| Central Latin America | 2008 | 0.913732 | 0.801903 |
| Central Latin America | 2009 | 0.918766 | 0.802136 |
| Central Latin America | 2010 | 0.932299 | 0.811422 |
| Central Latin America | 2011 | 0.923423 | 0.801163 |
| Central Latin America | 2012 | 0.916951 | 0.792063 |
| Central Latin America | 2013 | 0.906908 | 0.780367 |
| Central Latin America | 2014 | 0.915868 | 0.78579  |
| Central Latin America | 2015 | 0.904761 | 0.774169 |
| Central Latin America | 2016 | 0.894395 | 0.763281 |
| Central Latin America | 2017 | 0.878355 | 0.747275 |
| Central Latin America | 2018 | 0.879571 | 0.745725 |

|                            |      |          |          |
|----------------------------|------|----------|----------|
| Central Latin America      | 2019 | 0.873385 | 0.737332 |
| Central Sub-Saharan Africa | 1990 | 0.683461 | 0.582902 |
| Central Sub-Saharan Africa | 1991 | 0.694933 | 0.587758 |
| Central Sub-Saharan Africa | 1992 | 0.702424 | 0.589793 |
| Central Sub-Saharan Africa | 1993 | 0.714943 | 0.595657 |
| Central Sub-Saharan Africa | 1994 | 0.724653 | 0.59941  |
| Central Sub-Saharan Africa | 1995 | 0.732751 | 0.601448 |
| Central Sub-Saharan Africa | 1996 | 0.756166 | 0.614733 |
| Central Sub-Saharan Africa | 1997 | 0.757363 | 0.61014  |
| Central Sub-Saharan Africa | 1998 | 0.770799 | 0.615205 |
| Central Sub-Saharan Africa | 1999 | 0.783386 | 0.61934  |
| Central Sub-Saharan Africa | 2000 | 0.797995 | 0.624623 |
| Central Sub-Saharan Africa | 2001 | 0.813766 | 0.632481 |

|                            |      |          |          |
|----------------------------|------|----------|----------|
| Central Sub-Saharan Africa | 2002 | 0.833085 | 0.642304 |
| Central Sub-Saharan Africa | 2003 | 0.848224 | 0.65191  |
| Central Sub-Saharan Africa | 2004 | 0.857761 | 0.656619 |
| Central Sub-Saharan Africa | 2005 | 0.863588 | 0.659505 |
| Central Sub-Saharan Africa | 2006 | 0.861856 | 0.658283 |
| Central Sub-Saharan Africa | 2007 | 0.855563 | 0.655166 |
| Central Sub-Saharan Africa | 2008 | 0.851145 | 0.653598 |
| Central Sub-Saharan Africa | 2009 | 0.845802 | 0.651726 |
| Central Sub-Saharan Africa | 2010 | 0.838533 | 0.647863 |
| Central Sub-Saharan Africa | 2011 | 0.83013  | 0.644303 |
| Central Sub-Saharan Africa | 2012 | 0.823208 | 0.641886 |
| Central Sub-Saharan Africa | 2013 | 0.81738  | 0.640355 |
| Central Sub-Saharan Africa | 2014 | 0.813554 | 0.640249 |

|                            |      |          |          |
|----------------------------|------|----------|----------|
| Central Sub-Saharan Africa | 2015 | 0.81476  | 0.642448 |
| Central Sub-Saharan Africa | 2016 | 0.815014 | 0.646596 |
| Central Sub-Saharan Africa | 2017 | 0.815435 | 0.651542 |
| Central Sub-Saharan Africa | 2018 | 0.813046 | 0.653874 |
| Central Sub-Saharan Africa | 2019 | 0.812155 | 0.657802 |
| East Asia                  | 1990 | 0.978254 | 0.818335 |
| East Asia                  | 1991 | 0.969935 | 0.811948 |
| East Asia                  | 1992 | 0.969225 | 0.811294 |
| East Asia                  | 1993 | 0.975501 | 0.816535 |
| East Asia                  | 1994 | 0.983547 | 0.817634 |
| East Asia                  | 1995 | 0.970594 | 0.806198 |
| East Asia                  | 1996 | 0.968826 | 0.803903 |
| East Asia                  | 1997 | 0.972998 | 0.805497 |

|           |      |          |          |
|-----------|------|----------|----------|
| East Asia | 1998 | 0.970348 | 0.796676 |
| East Asia | 1999 | 0.973644 | 0.800535 |
| East Asia | 2000 | 0.973907 | 0.806971 |
| East Asia | 2001 | 0.961738 | 0.796409 |
| East Asia | 2002 | 0.943917 | 0.783934 |
| East Asia | 2003 | 0.933697 | 0.779517 |
| East Asia | 2004 | 0.918842 | 0.76399  |
| East Asia | 2005 | 0.899777 | 0.742355 |
| East Asia | 2006 | 0.909001 | 0.745431 |
| East Asia | 2007 | 0.904869 | 0.737149 |
| East Asia | 2008 | 0.898908 | 0.729162 |
| East Asia | 2009 | 0.893633 | 0.720614 |
| East Asia | 2010 | 0.891647 | 0.714709 |

|                |      |          |          |
|----------------|------|----------|----------|
| East Asia      | 2011 | 0.88997  | 0.706791 |
| East Asia      | 2012 | 0.868837 | 0.683317 |
| East Asia      | 2013 | 0.864019 | 0.674571 |
| East Asia      | 2014 | 0.860397 | 0.670162 |
| East Asia      | 2015 | 0.851087 | 0.659093 |
| East Asia      | 2016 | 0.854883 | 0.658215 |
| East Asia      | 2017 | 0.873032 | 0.671291 |
| East Asia      | 2018 | 0.892832 | 0.68718  |
| East Asia      | 2019 | 0.901698 | 0.691723 |
| Eastern Europe | 1990 | 1.23365  | 0.659579 |
| Eastern Europe | 1991 | 1.234032 | 0.661635 |
| Eastern Europe | 1992 | 1.179967 | 0.645697 |
| Eastern Europe | 1993 | 1.111938 | 0.629129 |



|                |      |          |          |
|----------------|------|----------|----------|
| Eastern Europe | 1994 | 1.083014 | 0.624362 |
| Eastern Europe | 1995 | 1.097775 | 0.626929 |
| Eastern Europe | 1996 | 1.136801 | 0.636876 |
| Eastern Europe | 1997 | 1.189719 | 0.652769 |
| Eastern Europe | 1998 | 1.200466 | 0.655556 |
| Eastern Europe | 1999 | 1.165156 | 0.646959 |
| Eastern Europe | 2000 | 1.133588 | 0.634773 |
| Eastern Europe | 2001 | 1.144775 | 0.639602 |
| Eastern Europe | 2002 | 1.145428 | 0.641292 |
| Eastern Europe | 2003 | 1.148307 | 0.645278 |
| Eastern Europe | 2004 | 1.147171 | 0.643072 |
| Eastern Europe | 2005 | 1.129964 | 0.635679 |
| Eastern Europe | 2006 | 1.160568 | 0.640647 |

|                |      |          |          |
|----------------|------|----------|----------|
| Eastern Europe | 2007 | 1.178074 | 0.645161 |
| Eastern Europe | 2008 | 1.173178 | 0.640809 |
| Eastern Europe | 2009 | 1.213267 | 0.652961 |
| Eastern Europe | 2010 | 1.216113 | 0.651057 |
| Eastern Europe | 2011 | 1.24856  | 0.661311 |
| Eastern Europe | 2012 | 1.26107  | 0.663132 |
| Eastern Europe | 2013 | 1.276739 | 0.668352 |
| Eastern Europe | 2014 | 1.282237 | 0.669976 |
| Eastern Europe | 2015 | 1.273576 | 0.668279 |
| Eastern Europe | 2016 | 1.293772 | 0.676652 |
| Eastern Europe | 2017 | 1.330071 | 0.693054 |
| Eastern Europe | 2018 | 1.325354 | 0.691408 |
| Eastern Europe | 2019 | 1.316541 | 0.688636 |

|                            |      |          |          |
|----------------------------|------|----------|----------|
| Eastern Sub-Saharan Africa | 1990 | 0.723735 | 0.659766 |
| Eastern Sub-Saharan Africa | 1991 | 0.716556 | 0.652735 |
| Eastern Sub-Saharan Africa | 1992 | 0.71224  | 0.648871 |
| Eastern Sub-Saharan Africa | 1993 | 0.705678 | 0.643593 |
| Eastern Sub-Saharan Africa | 1994 | 0.702762 | 0.640668 |
| Eastern Sub-Saharan Africa | 1995 | 0.698844 | 0.636628 |
| Eastern Sub-Saharan Africa | 1996 | 0.697362 | 0.635147 |
| Eastern Sub-Saharan Africa | 1997 | 0.698754 | 0.636152 |
| Eastern Sub-Saharan Africa | 1998 | 0.702868 | 0.639227 |
| Eastern Sub-Saharan Africa | 1999 | 0.705082 | 0.639977 |
| Eastern Sub-Saharan Africa | 2000 | 0.700715 | 0.635388 |
| Eastern Sub-Saharan Africa | 2001 | 0.699235 | 0.632593 |
| Eastern Sub-Saharan Africa | 2002 | 0.700728 | 0.632842 |

|                            |      |          |          |
|----------------------------|------|----------|----------|
| Eastern Sub-Saharan Africa | 2003 | 0.702876 | 0.634288 |
| Eastern Sub-Saharan Africa | 2004 | 0.704983 | 0.635906 |
| Eastern Sub-Saharan Africa | 2005 | 0.708518 | 0.638477 |
| Eastern Sub-Saharan Africa | 2006 | 0.707323 | 0.63662  |
| Eastern Sub-Saharan Africa | 2007 | 0.705661 | 0.634556 |
| Eastern Sub-Saharan Africa | 2008 | 0.703491 | 0.632789 |
| Eastern Sub-Saharan Africa | 2009 | 0.706474 | 0.635204 |
| Eastern Sub-Saharan Africa | 2010 | 0.711105 | 0.639797 |
| Eastern Sub-Saharan Africa | 2011 | 0.718351 | 0.646421 |
| Eastern Sub-Saharan Africa | 2012 | 0.723635 | 0.651391 |
| Eastern Sub-Saharan Africa | 2013 | 0.730521 | 0.657747 |
| Eastern Sub-Saharan Africa | 2014 | 0.735582 | 0.663012 |
| Eastern Sub-Saharan Africa | 2015 | 0.741687 | 0.668864 |

|                            |      |          |          |
|----------------------------|------|----------|----------|
| Eastern Sub-Saharan Africa | 2016 | 0.745789 | 0.673767 |
| Eastern Sub-Saharan Africa | 2017 | 0.752803 | 0.681804 |
| Eastern Sub-Saharan Africa | 2018 | 0.757852 | 0.687995 |
| Eastern Sub-Saharan Africa | 2019 | 0.762287 | 0.693751 |
| High-income Asia Pacific   | 1990 | 1.039751 | 0.667137 |
| High-income Asia Pacific   | 1991 | 1.043418 | 0.661266 |
| High-income Asia Pacific   | 1992 | 1.054406 | 0.660081 |
| High-income Asia Pacific   | 1993 | 1.065479 | 0.660206 |
| High-income Asia Pacific   | 1994 | 1.074912 | 0.660328 |
| High-income Asia Pacific   | 1995 | 1.08229  | 0.66066  |
| High-income Asia Pacific   | 1996 | 1.099512 | 0.667777 |
| High-income Asia Pacific   | 1997 | 1.103374 | 0.665346 |
| High-income Asia Pacific   | 1998 | 1.090814 | 0.652463 |

|                          |      |          |          |
|--------------------------|------|----------|----------|
| High-income Asia Pacific | 1999 | 1.080631 | 0.640419 |
| High-income Asia Pacific | 2000 | 1.077246 | 0.633324 |
| High-income Asia Pacific | 2001 | 1.078976 | 0.628989 |
| High-income Asia Pacific | 2002 | 1.083506 | 0.625751 |
| High-income Asia Pacific | 2003 | 1.079641 | 0.618161 |
| High-income Asia Pacific | 2004 | 1.086294 | 0.616881 |
| High-income Asia Pacific | 2005 | 1.078453 | 0.606349 |
| High-income Asia Pacific | 2006 | 1.085594 | 0.604766 |
| High-income Asia Pacific | 2007 | 1.076784 | 0.596348 |
| High-income Asia Pacific | 2008 | 1.064816 | 0.586519 |
| High-income Asia Pacific | 2009 | 1.046166 | 0.57464  |
| High-income Asia Pacific | 2010 | 1.038285 | 0.567576 |
| High-income Asia Pacific | 2011 | 1.055017 | 0.574227 |

|                           |      |          |          |
|---------------------------|------|----------|----------|
| High-income Asia Pacific  | 2012 | 1.065024 | 0.578891 |
| High-income Asia Pacific  | 2013 | 1.07446  | 0.584658 |
| High-income Asia Pacific  | 2014 | 1.080257 | 0.589475 |
| High-income Asia Pacific  | 2015 | 1.084531 | 0.590498 |
| High-income Asia Pacific  | 2016 | 1.093062 | 0.595518 |
| High-income Asia Pacific  | 2017 | 1.092684 | 0.597114 |
| High-income Asia Pacific  | 2018 | 1.106932 | 0.607797 |
| High-income Asia Pacific  | 2019 | 1.109359 | 0.612461 |
| High-income North America | 1990 | 1.118132 | 0.672668 |
| High-income North America | 1991 | 1.117006 | 0.672201 |
| High-income North America | 1992 | 1.115077 | 0.671045 |
| High-income North America | 1993 | 1.113464 | 0.670112 |
| High-income North America | 1994 | 1.122594 | 0.675419 |

|                           |      |          |          |
|---------------------------|------|----------|----------|
| High-income North America | 1995 | 1.124872 | 0.677823 |
| High-income North America | 1996 | 1.141051 | 0.688329 |
| High-income North America | 1997 | 1.152169 | 0.697537 |
| High-income North America | 1998 | 1.158742 | 0.704401 |
| High-income North America | 1999 | 1.166107 | 0.713378 |
| High-income North America | 2000 | 1.177151 | 0.724467 |
| High-income North America | 2001 | 1.177024 | 0.729607 |
| High-income North America | 2002 | 1.16057  | 0.723799 |
| High-income North America | 2003 | 1.151264 | 0.723251 |
| High-income North America | 2004 | 1.157041 | 0.731177 |
| High-income North America | 2005 | 1.157996 | 0.736166 |
| High-income North America | 2006 | 1.168287 | 0.747508 |
| High-income North America | 2007 | 1.174861 | 0.756554 |



|                              |      |          |          |
|------------------------------|------|----------|----------|
| High-income North America    | 2008 | 1.157709 | 0.751119 |
| High-income North America    | 2009 | 1.138461 | 0.745004 |
| High-income North America    | 2010 | 1.115781 | 0.735584 |
| High-income North America    | 2011 | 1.103844 | 0.734535 |
| High-income North America    | 2012 | 1.083181 | 0.727639 |
| High-income North America    | 2013 | 1.057522 | 0.717919 |
| High-income North America    | 2014 | 1.05067  | 0.720224 |
| High-income North America    | 2015 | 1.041592 | 0.720859 |
| High-income North America    | 2016 | 1.023499 | 0.715467 |
| High-income North America    | 2017 | 1.003664 | 0.707465 |
| High-income North America    | 2018 | 0.977158 | 0.692149 |
| High-income North America    | 2019 | 0.996235 | 0.70587  |
| North Africa and Middle East | 1990 | 0.992053 | 0.929902 |

|                              |      |          |          |
|------------------------------|------|----------|----------|
| North Africa and Middle East | 1991 | 0.999587 | 0.945749 |
| North Africa and Middle East | 1992 | 0.9933   | 0.945798 |
| North Africa and Middle East | 1993 | 0.991348 | 0.94837  |
| North Africa and Middle East | 1994 | 0.994314 | 0.95637  |
| North Africa and Middle East | 1995 | 0.992249 | 0.956899 |
| North Africa and Middle East | 1996 | 0.997432 | 0.963296 |
| North Africa and Middle East | 1997 | 0.988848 | 0.952588 |
| North Africa and Middle East | 1998 | 0.984311 | 0.946822 |
| North Africa and Middle East | 1999 | 0.989991 | 0.956975 |
| North Africa and Middle East | 2000 | 0.99719  | 0.973325 |
| North Africa and Middle East | 2001 | 0.988859 | 0.958619 |
| North Africa and Middle East | 2002 | 0.972092 | 0.932539 |
| North Africa and Middle East | 2003 | 0.965162 | 0.921957 |

|                              |      |          |          |
|------------------------------|------|----------|----------|
| North Africa and Middle East | 2004 | 0.972897 | 0.926071 |
| North Africa and Middle East | 2005 | 0.989718 | 0.947247 |
| North Africa and Middle East | 2006 | 1.004557 | 0.974732 |
| North Africa and Middle East | 2007 | 1.01095  | 0.99362  |
| North Africa and Middle East | 2008 | 1.017714 | 1.012304 |
| North Africa and Middle East | 2009 | 1.015727 | 1.017749 |
| North Africa and Middle East | 2010 | 1.014014 | 1.01966  |
| North Africa and Middle East | 2011 | 1.001629 | 1.011346 |
| North Africa and Middle East | 2012 | 1.002972 | 1.013633 |
| North Africa and Middle East | 2013 | 0.984389 | 0.993935 |
| North Africa and Middle East | 2014 | 0.990925 | 1.001141 |
| North Africa and Middle East | 2015 | 1.002549 | 1.012016 |
| North Africa and Middle East | 2016 | 1.010398 | 1.021392 |

|                              |      |          |          |
|------------------------------|------|----------|----------|
| North Africa and Middle East | 2017 | 1.014892 | 1.02737  |
| North Africa and Middle East | 2018 | 1.018101 | 1.032525 |
| North Africa and Middle East | 2019 | 1.017794 | 1.032346 |
| Oceania                      | 1990 | 0.714981 | 0.712764 |
| Oceania                      | 1991 | 0.713966 | 0.709276 |
| Oceania                      | 1992 | 0.715391 | 0.707661 |
| Oceania                      | 1993 | 0.716127 | 0.705628 |
| Oceania                      | 1994 | 0.717851 | 0.704957 |
| Oceania                      | 1995 | 0.720437 | 0.708679 |
| Oceania                      | 1996 | 0.728436 | 0.718749 |
| Oceania                      | 1997 | 0.73471  | 0.724774 |
| Oceania                      | 1998 | 0.74027  | 0.731    |
| Oceania                      | 1999 | 0.740747 | 0.73015  |

|         |      |          |          |
|---------|------|----------|----------|
| Oceania | 2000 | 0.739459 | 0.729167 |
| Oceania | 2001 | 0.732115 | 0.724288 |
| Oceania | 2002 | 0.737227 | 0.727466 |
| Oceania | 2003 | 0.745093 | 0.73641  |
| Oceania | 2004 | 0.743631 | 0.734994 |
| Oceania | 2005 | 0.727771 | 0.719476 |
| Oceania | 2006 | 0.721573 | 0.712822 |
| Oceania | 2007 | 0.715807 | 0.705716 |
| Oceania | 2008 | 0.711278 | 0.705836 |
| Oceania | 2009 | 0.708497 | 0.704765 |
| Oceania | 2010 | 0.697016 | 0.695086 |
| Oceania | 2011 | 0.685978 | 0.686528 |
| Oceania | 2012 | 0.677235 | 0.68009  |

|            |      |          |          |
|------------|------|----------|----------|
| Oceania    | 2013 | 0.672653 | 0.677716 |
| Oceania    | 2014 | 0.668907 | 0.674571 |
| Oceania    | 2015 | 0.668124 | 0.67487  |
| Oceania    | 2016 | 0.667828 | 0.674982 |
| Oceania    | 2017 | 0.664246 | 0.672026 |
| Oceania    | 2018 | 0.659172 | 0.669561 |
| Oceania    | 2019 | 0.660332 | 0.672439 |
| South Asia | 1990 | 0.66507  | 0.698583 |
| South Asia | 1991 | 0.661937 | 0.69396  |
| South Asia | 1992 | 0.675911 | 0.704971 |
| South Asia | 1993 | 0.671216 | 0.699226 |
| South Asia | 1994 | 0.670005 | 0.695142 |
| South Asia | 1995 | 0.673903 | 0.695892 |

|            |      |          |          |
|------------|------|----------|----------|
| South Asia | 1996 | 0.673456 | 0.689668 |
| South Asia | 1997 | 0.675591 | 0.688244 |
| South Asia | 1998 | 0.68373  | 0.697407 |
| South Asia | 1999 | 0.682567 | 0.698546 |
| South Asia | 2000 | 0.669169 | 0.681507 |
| South Asia | 2001 | 0.669284 | 0.679742 |
| South Asia | 2002 | 0.667592 | 0.676094 |
| South Asia | 2003 | 0.654533 | 0.65867  |
| South Asia | 2004 | 0.648943 | 0.64878  |
| South Asia | 2005 | 0.646784 | 0.643141 |
| South Asia | 2006 | 0.64926  | 0.645759 |
| South Asia | 2007 | 0.650865 | 0.646551 |
| South Asia | 2008 | 0.644718 | 0.637315 |

|                |      |          |          |
|----------------|------|----------|----------|
| South Asia     | 2009 | 0.648902 | 0.634807 |
| South Asia     | 2010 | 0.661674 | 0.639831 |
| South Asia     | 2011 | 0.666136 | 0.642593 |
| South Asia     | 2012 | 0.677551 | 0.653581 |
| South Asia     | 2013 | 0.700175 | 0.664938 |
| South Asia     | 2014 | 0.725503 | 0.679458 |
| South Asia     | 2015 | 0.75062  | 0.703432 |
| South Asia     | 2016 | 0.752504 | 0.708796 |
| South Asia     | 2017 | 0.754074 | 0.711262 |
| South Asia     | 2018 | 0.755202 | 0.708314 |
| South Asia     | 2019 | 0.759717 | 0.712613 |
| Southeast Asia | 1990 | 0.996027 | 0.865118 |
| Southeast Asia | 1991 | 0.986435 | 0.857618 |



|                |      |          |          |
|----------------|------|----------|----------|
| Southeast Asia | 1992 | 0.979521 | 0.851068 |
| Southeast Asia | 1993 | 0.975002 | 0.847726 |
| Southeast Asia | 1994 | 0.966841 | 0.841815 |
| Southeast Asia | 1995 | 0.959653 | 0.8355   |
| Southeast Asia | 1996 | 0.958879 | 0.833157 |
| Southeast Asia | 1997 | 0.967228 | 0.835268 |
| Southeast Asia | 1998 | 0.968374 | 0.828115 |
| Southeast Asia | 1999 | 0.974419 | 0.832331 |
| Southeast Asia | 2000 | 0.982661 | 0.837888 |
| Southeast Asia | 2001 | 0.989978 | 0.845043 |
| Southeast Asia | 2002 | 1.00304  | 0.857111 |
| Southeast Asia | 2003 | 1.00702  | 0.86077  |
| Southeast Asia | 2004 | 1.010903 | 0.865647 |

|                |      |          |          |
|----------------|------|----------|----------|
| Southeast Asia | 2005 | 1.009594 | 0.864883 |
| Southeast Asia | 2006 | 1.006894 | 0.863283 |
| Southeast Asia | 2007 | 1.004802 | 0.862165 |
| Southeast Asia | 2008 | 0.998931 | 0.857502 |
| Southeast Asia | 2009 | 0.993168 | 0.853077 |
| Southeast Asia | 2010 | 0.985052 | 0.846161 |
| Southeast Asia | 2011 | 0.972286 | 0.836049 |
| Southeast Asia | 2012 | 0.961676 | 0.827129 |
| Southeast Asia | 2013 | 0.957614 | 0.824501 |
| Southeast Asia | 2014 | 0.947844 | 0.816169 |
| Southeast Asia | 2015 | 0.944072 | 0.811403 |
| Southeast Asia | 2016 | 0.944548 | 0.810911 |
| Southeast Asia | 2017 | 0.954061 | 0.817224 |

|                        |      |          |          |
|------------------------|------|----------|----------|
| Southeast Asia         | 2018 | 0.963672 | 0.823881 |
| Southeast Asia         | 2019 | 0.970656 | 0.827904 |
| Southern Latin America | 1990 | 0.836852 | 0.615026 |
| Southern Latin America | 1991 | 0.840997 | 0.616255 |
| Southern Latin America | 1992 | 0.838523 | 0.611796 |
| Southern Latin America | 1993 | 0.846781 | 0.613563 |
| Southern Latin America | 1994 | 0.858913 | 0.620038 |
| Southern Latin America | 1995 | 0.870687 | 0.623389 |
| Southern Latin America | 1996 | 0.877568 | 0.623542 |
| Southern Latin America | 1997 | 0.900245 | 0.635494 |
| Southern Latin America | 1998 | 0.924286 | 0.646916 |
| Southern Latin America | 1999 | 0.940666 | 0.653284 |
| Southern Latin America | 2000 | 0.951995 | 0.657239 |

|                        |      |          |          |
|------------------------|------|----------|----------|
| Southern Latin America | 2001 | 0.954878 | 0.65674  |
| Southern Latin America | 2002 | 0.947038 | 0.648019 |
| Southern Latin America | 2003 | 0.954421 | 0.648565 |
| Southern Latin America | 2004 | 0.958557 | 0.647573 |
| Southern Latin America | 2005 | 0.957894 | 0.645642 |
| Southern Latin America | 2006 | 0.968127 | 0.651186 |
| Southern Latin America | 2007 | 0.96893  | 0.649748 |
| Southern Latin America | 2008 | 0.980789 | 0.657073 |
| Southern Latin America | 2009 | 0.982553 | 0.65619  |
| Southern Latin America | 2010 | 0.995161 | 0.660136 |
| Southern Latin America | 2011 | 1.000659 | 0.661048 |
| Southern Latin America | 2012 | 0.997452 | 0.658189 |
| Southern Latin America | 2013 | 1.004457 | 0.661778 |

|                             |      |          |          |
|-----------------------------|------|----------|----------|
| Southern Latin America      | 2014 | 1.008837 | 0.663532 |
| Southern Latin America      | 2015 | 1.005479 | 0.661634 |
| Southern Latin America      | 2016 | 0.998337 | 0.657825 |
| Southern Latin America      | 2017 | 0.994391 | 0.65736  |
| Southern Latin America      | 2018 | 0.995722 | 0.662491 |
| Southern Latin America      | 2019 | 0.992334 | 0.66318  |
| Southern Sub-Saharan Africa | 1990 | 0.799727 | 0.566804 |
| Southern Sub-Saharan Africa | 1991 | 0.776829 | 0.54927  |
| Southern Sub-Saharan Africa | 1992 | 0.820106 | 0.577714 |
| Southern Sub-Saharan Africa | 1993 | 0.774803 | 0.54824  |
| Southern Sub-Saharan Africa | 1994 | 0.788186 | 0.555732 |
| Southern Sub-Saharan Africa | 1995 | 0.709621 | 0.502163 |
| Southern Sub-Saharan Africa | 1996 | 0.706395 | 0.498609 |

|                             |      |          |          |
|-----------------------------|------|----------|----------|
| Southern Sub-Saharan Africa | 1997 | 0.742709 | 0.519068 |
| Southern Sub-Saharan Africa | 1998 | 0.733636 | 0.510162 |
| Southern Sub-Saharan Africa | 1999 | 0.753431 | 0.518147 |
| Southern Sub-Saharan Africa | 2000 | 0.778592 | 0.531112 |
| Southern Sub-Saharan Africa | 2001 | 0.780906 | 0.52916  |
| Southern Sub-Saharan Africa | 2002 | 0.791602 | 0.532937 |
| Southern Sub-Saharan Africa | 2003 | 0.798728 | 0.534572 |
| Southern Sub-Saharan Africa | 2004 | 0.802828 | 0.536106 |
| Southern Sub-Saharan Africa | 2005 | 0.800053 | 0.534634 |
| Southern Sub-Saharan Africa | 2006 | 0.805583 | 0.537221 |
| Southern Sub-Saharan Africa | 2007 | 0.802574 | 0.536309 |
| Southern Sub-Saharan Africa | 2008 | 0.807065 | 0.539654 |
| Southern Sub-Saharan Africa | 2009 | 0.812728 | 0.542922 |

|                             |      |          |          |
|-----------------------------|------|----------|----------|
| Southern Sub-Saharan Africa | 2010 | 0.815654 | 0.542544 |
| Southern Sub-Saharan Africa | 2011 | 0.825888 | 0.547379 |
| Southern Sub-Saharan Africa | 2012 | 0.83456  | 0.554376 |
| Southern Sub-Saharan Africa | 2013 | 0.843888 | 0.56142  |
| Southern Sub-Saharan Africa | 2014 | 0.858826 | 0.572506 |
| Southern Sub-Saharan Africa | 2015 | 0.861626 | 0.576232 |
| Southern Sub-Saharan Africa | 2016 | 0.862458 | 0.57647  |
| Southern Sub-Saharan Africa | 2017 | 0.850199 | 0.571158 |
| Southern Sub-Saharan Africa | 2018 | 0.834525 | 0.564877 |
| Southern Sub-Saharan Africa | 2019 | 0.832604 | 0.566608 |
| Tropical Latin America      | 1990 | 0.868384 | 0.734218 |
| Tropical Latin America      | 1991 | 0.871664 | 0.732863 |
| Tropical Latin America      | 1992 | 0.872822 | 0.730195 |

|                        |      |          |          |
|------------------------|------|----------|----------|
| Tropical Latin America | 1993 | 0.870659 | 0.725086 |
| Tropical Latin America | 1994 | 0.872989 | 0.725556 |
| Tropical Latin America | 1995 | 0.8882   | 0.736898 |
| Tropical Latin America | 1996 | 0.90161  | 0.748706 |
| Tropical Latin America | 1997 | 0.912623 | 0.755214 |
| Tropical Latin America | 1998 | 0.915054 | 0.754469 |
| Tropical Latin America | 1999 | 0.919973 | 0.756125 |
| Tropical Latin America | 2000 | 0.92274  | 0.755265 |
| Tropical Latin America | 2001 | 0.92301  | 0.75235  |
| Tropical Latin America | 2002 | 0.925579 | 0.750251 |
| Tropical Latin America | 2003 | 0.914222 | 0.737044 |
| Tropical Latin America | 2004 | 0.908803 | 0.729144 |
| Tropical Latin America | 2005 | 0.909014 | 0.726955 |



|                        |      |          |          |
|------------------------|------|----------|----------|
| Tropical Latin America | 2006 | 0.914548 | 0.728219 |
| Tropical Latin America | 2007 | 0.91622  | 0.726039 |
| Tropical Latin America | 2008 | 0.918839 | 0.724886 |
| Tropical Latin America | 2009 | 0.924596 | 0.725983 |
| Tropical Latin America | 2010 | 0.927897 | 0.724711 |
| Tropical Latin America | 2011 | 0.927844 | 0.721599 |
| Tropical Latin America | 2012 | 0.930201 | 0.720433 |
| Tropical Latin America | 2013 | 0.92795  | 0.715936 |
| Tropical Latin America | 2014 | 0.925154 | 0.711512 |
| Tropical Latin America | 2015 | 0.925393 | 0.70904  |
| Tropical Latin America | 2016 | 0.917662 | 0.700946 |
| Tropical Latin America | 2017 | 0.92015  | 0.701317 |
| Tropical Latin America | 2018 | 0.927136 | 0.707273 |

|                        |      |          |          |
|------------------------|------|----------|----------|
| Tropical Latin America | 2019 | 0.922426 | 0.703827 |
| Western Europe         | 1990 | 1.187221 | 0.636881 |
| Western Europe         | 1991 | 1.17978  | 0.631171 |
| Western Europe         | 1992 | 1.179064 | 0.629347 |
| Western Europe         | 1993 | 1.181449 | 0.629072 |
| Western Europe         | 1994 | 1.189826 | 0.632836 |
| Western Europe         | 1995 | 1.191172 | 0.631937 |
| Western Europe         | 1996 | 1.195132 | 0.632473 |
| Western Europe         | 1997 | 1.206631 | 0.637573 |
| Western Europe         | 1998 | 1.213062 | 0.641914 |
| Western Europe         | 1999 | 1.216683 | 0.643583 |
| Western Europe         | 2000 | 1.234761 | 0.651178 |
| Western Europe         | 2001 | 1.2483   | 0.658031 |

|                |      |          |          |
|----------------|------|----------|----------|
| Western Europe | 2002 | 1.257153 | 0.663607 |
| Western Europe | 2003 | 1.260606 | 0.667379 |
| Western Europe | 2004 | 1.27021  | 0.674738 |
| Western Europe | 2005 | 1.276144 | 0.679276 |
| Western Europe | 2006 | 1.279993 | 0.683381 |
| Western Europe | 2007 | 1.283076 | 0.68944  |
| Western Europe | 2008 | 1.289726 | 0.697937 |
| Western Europe | 2009 | 1.287437 | 0.701796 |
| Western Europe | 2010 | 1.288567 | 0.70405  |
| Western Europe | 2011 | 1.303959 | 0.711458 |
| Western Europe | 2012 | 1.310276 | 0.715725 |
| Western Europe | 2013 | 1.313979 | 0.720856 |
| Western Europe | 2014 | 1.317178 | 0.725604 |

|                            |      |          |          |
|----------------------------|------|----------|----------|
| Western Europe             | 2015 | 1.310931 | 0.726156 |
| Western Europe             | 2016 | 1.310262 | 0.730428 |
| Western Europe             | 2017 | 1.285904 | 0.726461 |
| Western Europe             | 2018 | 1.279483 | 0.731767 |
| Western Europe             | 2019 | 1.263779 | 0.731772 |
| Western Sub-Saharan Africa | 1990 | 0.943231 | 0.876176 |
| Western Sub-Saharan Africa | 1991 | 0.93766  | 0.874746 |
| Western Sub-Saharan Africa | 1992 | 0.931574 | 0.874356 |
| Western Sub-Saharan Africa | 1993 | 0.922468 | 0.87055  |
| Western Sub-Saharan Africa | 1994 | 0.915253 | 0.867589 |
| Western Sub-Saharan Africa | 1995 | 0.906125 | 0.861331 |
| Western Sub-Saharan Africa | 1996 | 0.896934 | 0.855647 |
| Western Sub-Saharan Africa | 1997 | 0.893333 | 0.854683 |

|                            |      |          |          |
|----------------------------|------|----------|----------|
| Western Sub-Saharan Africa | 1998 | 0.884804 | 0.84926  |
| Western Sub-Saharan Africa | 1999 | 0.870291 | 0.83736  |
| Western Sub-Saharan Africa | 2000 | 0.86047  | 0.828306 |
| Western Sub-Saharan Africa | 2001 | 0.852357 | 0.822349 |
| Western Sub-Saharan Africa | 2002 | 0.846533 | 0.817614 |
| Western Sub-Saharan Africa | 2003 | 0.839041 | 0.812645 |
| Western Sub-Saharan Africa | 2004 | 0.830404 | 0.80605  |
| Western Sub-Saharan Africa | 2005 | 0.822259 | 0.798324 |
| Western Sub-Saharan Africa | 2006 | 0.817552 | 0.793607 |
| Western Sub-Saharan Africa | 2007 | 0.812308 | 0.787728 |
| Western Sub-Saharan Africa | 2008 | 0.805224 | 0.779451 |
| Western Sub-Saharan Africa | 2009 | 0.79906  | 0.771461 |
| Western Sub-Saharan Africa | 2010 | 0.794901 | 0.76539  |

|                            |      |          |          |
|----------------------------|------|----------|----------|
| Western Sub-Saharan Africa | 2011 | 0.793234 | 0.761174 |
| Western Sub-Saharan Africa | 2012 | 0.793325 | 0.757741 |
| Western Sub-Saharan Africa | 2013 | 0.790147 | 0.750627 |
| Western Sub-Saharan Africa | 2014 | 0.79643  | 0.752517 |
| Western Sub-Saharan Africa | 2015 | 0.804319 | 0.755615 |
| Western Sub-Saharan Africa | 2016 | 0.812327 | 0.759468 |
| Western Sub-Saharan Africa | 2017 | 0.822265 | 0.764697 |
| Western Sub-Saharan Africa | 2018 | 0.830106 | 0.768468 |
| Western Sub-Saharan Africa | 2019 | 0.839655 | 0.773633 |

**Supplemental table 6. Death cases ratio between females to males and age-standardized death rate (ASDR) ratio between females to males in 204 countries and territories from 1990 to 2019 in 204 countries.**

| location    | year | Ratio of female to male death cases | Ratio of female ASDR to male ASDR |
|-------------|------|-------------------------------------|-----------------------------------|
| Afghanistan | 1990 | 0.961218                            | 0.963112                          |
| Afghanistan | 1991 | 0.961054                            | 0.95357                           |
| Afghanistan | 1992 | 0.957648                            | 0.93756                           |
| Afghanistan | 1993 | 0.960475                            | 0.930057                          |
| Afghanistan | 1994 | 0.965727                            | 0.927966                          |
| Afghanistan | 1995 | 0.967031                            | 0.922941                          |
| Afghanistan | 1996 | 0.96932                             | 0.918637                          |
| Afghanistan | 1997 | 0.969684                            | 0.912595                          |
| Afghanistan | 1998 | 0.972555                            | 0.909395                          |
| Afghanistan | 1999 | 0.980011                            | 0.90888                           |
| Afghanistan | 2000 | 0.985626                            | 0.909379                          |
| Afghanistan | 2001 | 0.993832                            | 0.910933                          |
| Afghanistan | 2002 | 1.000351                            | 0.912563                          |
| Afghanistan | 2003 | 1.015199                            | 0.919405                          |
| Afghanistan | 2004 | 1.036288                            | 0.930023                          |
| Afghanistan | 2005 | 1.050515                            | 0.939235                          |
| Afghanistan | 2006 | 1.060058                            | 0.943996                          |
| Afghanistan | 2007 | 1.06658                             | 0.947329                          |
| Afghanistan | 2008 | 1.078541                            | 0.954077                          |
| Afghanistan | 2009 | 1.09462                             | 0.962852                          |
| Afghanistan | 2010 | 1.110446                            | 0.974819                          |

|             |      |          |          |
|-------------|------|----------|----------|
| Afghanistan | 2011 | 1.121862 | 0.982551 |
| Afghanistan | 2012 | 1.126085 | 0.985505 |
| Afghanistan | 2013 | 1.135187 | 0.991014 |
| Afghanistan | 2014 | 1.143462 | 0.994594 |
| Afghanistan | 2015 | 1.148955 | 1.000242 |
| Afghanistan | 2016 | 1.158044 | 1.008886 |
| Afghanistan | 2017 | 1.170556 | 1.019302 |
| Afghanistan | 2018 | 1.180678 | 1.02524  |
| Afghanistan | 2019 | 1.191846 | 1.032065 |
| Albania     | 1990 | 0.80288  | 0.611067 |
| Albania     | 1991 | 0.824545 | 0.633067 |
| Albania     | 1992 | 0.847876 | 0.64608  |
| Albania     | 1993 | 0.8389   | 0.634173 |
| Albania     | 1994 | 0.851827 | 0.63936  |
| Albania     | 1995 | 0.863218 | 0.645539 |
| Albania     | 1996 | 0.835124 | 0.620725 |
| Albania     | 1997 | 0.820214 | 0.614118 |
| Albania     | 1998 | 0.796342 | 0.603217 |
| Albania     | 1999 | 0.836725 | 0.632571 |
| Albania     | 2000 | 0.801031 | 0.607676 |
| Albania     | 2001 | 0.800875 | 0.612752 |
| Albania     | 2002 | 0.818988 | 0.631664 |
| Albania     | 2003 | 0.829379 | 0.645643 |
| Albania     | 2004 | 0.814148 | 0.640171 |
| Albania     | 2005 | 0.844958 | 0.66871  |



|         |      |          |          |
|---------|------|----------|----------|
| Albania | 2006 | 0.861627 | 0.685951 |
| Albania | 2007 | 0.878193 | 0.701901 |
| Albania | 2008 | 0.873395 | 0.701159 |
| Albania | 2009 | 0.851996 | 0.687584 |
| Albania | 2010 | 0.836195 | 0.676588 |
| Albania | 2011 | 0.829811 | 0.676367 |
| Albania | 2012 | 0.835089 | 0.683686 |
| Albania | 2013 | 0.835903 | 0.687582 |
| Albania | 2014 | 0.819922 | 0.678315 |
| Albania | 2015 | 0.807743 | 0.670891 |
| Albania | 2016 | 0.816522 | 0.677372 |
| Albania | 2017 | 0.824754 | 0.682594 |
| Albania | 2018 | 0.833083 | 0.687361 |
| Albania | 2019 | 0.84051  | 0.691033 |
| Algeria | 1990 | 1.109457 | 1.137995 |
| Algeria | 1991 | 1.109573 | 1.103907 |
| Algeria | 1992 | 1.104276 | 1.086803 |
| Algeria | 1993 | 1.099944 | 1.074033 |
| Algeria | 1994 | 1.107022 | 1.066426 |
| Algeria | 1995 | 1.109373 | 1.065159 |
| Algeria | 1996 | 1.112722 | 1.065549 |
| Algeria | 1997 | 1.105399 | 1.055999 |
| Algeria | 1998 | 1.093316 | 1.043813 |
| Algeria | 1999 | 1.103667 | 1.053381 |
| Algeria | 2000 | 1.110872 | 1.065961 |

|                |      |          |          |
|----------------|------|----------|----------|
| Algeria        | 2001 | 1.113195 | 1.075515 |
| Algeria        | 2002 | 1.11772  | 1.088375 |
| Algeria        | 2003 | 1.119067 | 1.111271 |
| Algeria        | 2004 | 1.136506 | 1.142565 |
| Algeria        | 2005 | 1.14715  | 1.169811 |
| Algeria        | 2006 | 1.15201  | 1.190973 |
| Algeria        | 2007 | 1.155168 | 1.209171 |
| Algeria        | 2008 | 1.15859  | 1.228457 |
| Algeria        | 2009 | 1.163619 | 1.248209 |
| Algeria        | 2010 | 1.177218 | 1.286784 |
| Algeria        | 2011 | 1.186641 | 1.312148 |
| Algeria        | 2012 | 1.189601 | 1.324703 |
| Algeria        | 2013 | 1.204505 | 1.349103 |
| Algeria        | 2014 | 1.219508 | 1.372427 |
| Algeria        | 2015 | 1.223912 | 1.38569  |
| Algeria        | 2016 | 1.212958 | 1.379575 |
| Algeria        | 2017 | 1.211995 | 1.380939 |
| Algeria        | 2018 | 1.241531 | 1.414697 |
| Algeria        | 2019 | 1.249033 | 1.426351 |
| American Samoa | 1990 | 0.612611 | 0.596702 |
| American Samoa | 1991 | 0.61697  | 0.598437 |
| American Samoa | 1992 | 0.631844 | 0.608174 |
| American Samoa | 1993 | 0.653989 | 0.623514 |
| American Samoa | 1994 | 0.681528 | 0.645433 |
| American Samoa | 1995 | 0.704734 | 0.662102 |

|                |      |          |          |
|----------------|------|----------|----------|
| American Samoa | 1996 | 0.730556 | 0.680042 |
| American Samoa | 1997 | 0.750686 | 0.692616 |
| American Samoa | 1998 | 0.768062 | 0.702708 |
| American Samoa | 1999 | 0.803672 | 0.728942 |
| American Samoa | 2000 | 0.82894  | 0.746903 |
| American Samoa | 2001 | 0.858097 | 0.770038 |
| American Samoa | 2002 | 0.853244 | 0.762156 |
| American Samoa | 2003 | 0.879136 | 0.781717 |
| American Samoa | 2004 | 0.893409 | 0.791329 |
| American Samoa | 2005 | 0.864685 | 0.762067 |
| American Samoa | 2006 | 0.856831 | 0.751596 |
| American Samoa | 2007 | 0.840159 | 0.734654 |
| American Samoa | 2008 | 0.82017  | 0.71572  |
| American Samoa | 2009 | 0.807269 | 0.703181 |
| American Samoa | 2010 | 0.797999 | 0.692814 |
| American Samoa | 2011 | 0.806261 | 0.69851  |
| American Samoa | 2012 | 0.825197 | 0.714836 |
| American Samoa | 2013 | 0.829821 | 0.719759 |
| American Samoa | 2014 | 0.829493 | 0.720731 |
| American Samoa | 2015 | 0.835253 | 0.726995 |
| American Samoa | 2016 | 0.834591 | 0.726271 |
| American Samoa | 2017 | 0.83428  | 0.726919 |
| American Samoa | 2018 | 0.833313 | 0.727019 |
| American Samoa | 2019 | 0.832801 | 0.72741  |
| Andorra        | 1990 | 0.788861 | 0.729791 |

|         |      |          |          |
|---------|------|----------|----------|
| Andorra | 1991 | 0.777657 | 0.721833 |
| Andorra | 1992 | 0.786613 | 0.72433  |
| Andorra | 1993 | 0.799267 | 0.736144 |
| Andorra | 1994 | 0.822512 | 0.748494 |
| Andorra | 1995 | 0.815241 | 0.73957  |
| Andorra | 1996 | 0.812205 | 0.734919 |
| Andorra | 1997 | 0.819344 | 0.731837 |
| Andorra | 1998 | 0.822769 | 0.728802 |
| Andorra | 1999 | 0.83361  | 0.726268 |
| Andorra | 2000 | 0.838352 | 0.725112 |
| Andorra | 2001 | 0.84257  | 0.723152 |
| Andorra | 2002 | 0.857376 | 0.721192 |
| Andorra | 2003 | 0.855856 | 0.717126 |
| Andorra | 2004 | 0.880115 | 0.725276 |
| Andorra | 2005 | 0.88978  | 0.727032 |
| Andorra | 2006 | 0.905426 | 0.732969 |
| Andorra | 2007 | 0.920575 | 0.73044  |
| Andorra | 2008 | 0.930871 | 0.739732 |
| Andorra | 2009 | 0.966364 | 0.755799 |
| Andorra | 2010 | 0.984365 | 0.766113 |
| Andorra | 2011 | 1.019081 | 0.772799 |
| Andorra | 2012 | 1.070344 | 0.791319 |
| Andorra | 2013 | 1.089581 | 0.811453 |
| Andorra | 2014 | 1.126724 | 0.832771 |
| Andorra | 2015 | 1.162229 | 0.859118 |

|         |      |          |          |
|---------|------|----------|----------|
| Andorra | 2016 | 1.164998 | 0.860014 |
| Andorra | 2017 | 1.180541 | 0.862883 |
| Andorra | 2018 | 1.169541 | 0.866757 |
| Andorra | 2019 | 1.178874 | 0.871085 |
| Angola  | 1990 | 0.537106 | 0.457811 |
| Angola  | 1991 | 0.544217 | 0.460671 |
| Angola  | 1992 | 0.551135 | 0.46428  |
| Angola  | 1993 | 0.559343 | 0.468348 |
| Angola  | 1994 | 0.567008 | 0.47207  |
| Angola  | 1995 | 0.57392  | 0.474355 |
| Angola  | 1996 | 0.582053 | 0.476191 |
| Angola  | 1997 | 0.592023 | 0.480883 |
| Angola  | 1998 | 0.602272 | 0.487081 |
| Angola  | 1999 | 0.616042 | 0.494658 |
| Angola  | 2000 | 0.625475 | 0.49915  |
| Angola  | 2001 | 0.625067 | 0.497084 |
| Angola  | 2002 | 0.651311 | 0.513815 |
| Angola  | 2003 | 0.668571 | 0.527179 |
| Angola  | 2004 | 0.671047 | 0.528362 |
| Angola  | 2005 | 0.66996  | 0.528374 |
| Angola  | 2006 | 0.653598 | 0.518225 |
| Angola  | 2007 | 0.639537 | 0.508693 |
| Angola  | 2008 | 0.641562 | 0.510323 |
| Angola  | 2009 | 0.636395 | 0.509296 |
| Angola  | 2010 | 0.633737 | 0.507852 |

|                     |      |          |          |
|---------------------|------|----------|----------|
| Angola              | 2011 | 0.627955 | 0.505033 |
| Angola              | 2012 | 0.619494 | 0.500108 |
| Angola              | 2013 | 0.615684 | 0.497491 |
| Angola              | 2014 | 0.611861 | 0.494839 |
| Angola              | 2015 | 0.618424 | 0.500956 |
| Angola              | 2016 | 0.629456 | 0.509579 |
| Angola              | 2017 | 0.635562 | 0.517839 |
| Angola              | 2018 | 0.641232 | 0.523674 |
| Angola              | 2019 | 0.647501 | 0.530396 |
| Antigua and Barbuda | 1990 | 0.666514 | 0.446543 |
| Antigua and Barbuda | 1991 | 0.715685 | 0.478107 |
| Antigua and Barbuda | 1992 | 0.714282 | 0.479608 |
| Antigua and Barbuda | 1993 | 0.732266 | 0.493697 |
| Antigua and Barbuda | 1994 | 0.736436 | 0.499464 |
| Antigua and Barbuda | 1995 | 0.737658 | 0.502559 |
| Antigua and Barbuda | 1996 | 0.834084 | 0.578888 |
| Antigua and Barbuda | 1997 | 0.849233 | 0.599587 |
| Antigua and Barbuda | 1998 | 0.856383 | 0.615655 |
| Antigua and Barbuda | 1999 | 0.86549  | 0.631337 |
| Antigua and Barbuda | 2000 | 0.88497  | 0.654818 |
| Antigua and Barbuda | 2001 | 0.922952 | 0.693046 |
| Antigua and Barbuda | 2002 | 0.937509 | 0.716928 |
| Antigua and Barbuda | 2003 | 0.931884 | 0.725553 |
| Antigua and Barbuda | 2004 | 0.928461 | 0.73322  |
| Antigua and Barbuda | 2005 | 0.915143 | 0.734142 |

|                     |      |          |          |
|---------------------|------|----------|----------|
| Antigua and Barbuda | 2006 | 0.886643 | 0.717462 |
| Antigua and Barbuda | 2007 | 0.737094 | 0.586594 |
| Antigua and Barbuda | 2008 | 0.740284 | 0.585623 |
| Antigua and Barbuda | 2009 | 0.834307 | 0.66124  |
| Antigua and Barbuda | 2010 | 0.855069 | 0.67682  |
| Antigua and Barbuda | 2011 | 0.878277 | 0.69395  |
| Antigua and Barbuda | 2012 | 0.910791 | 0.720486 |
| Antigua and Barbuda | 2013 | 0.946769 | 0.754748 |
| Antigua and Barbuda | 2014 | 0.946533 | 0.756041 |
| Antigua and Barbuda | 2015 | 0.944465 | 0.754486 |
| Antigua and Barbuda | 2016 | 0.949086 | 0.759164 |
| Antigua and Barbuda | 2017 | 0.961636 | 0.775668 |
| Antigua and Barbuda | 2018 | 0.955232 | 0.775363 |
| Antigua and Barbuda | 2019 | 0.938257 | 0.764103 |
| Argentina           | 1990 | 0.816301 | 0.592396 |
| Argentina           | 1991 | 0.81505  | 0.589561 |
| Argentina           | 1992 | 0.809108 | 0.582187 |
| Argentina           | 1993 | 0.820178 | 0.585302 |
| Argentina           | 1994 | 0.835615 | 0.593134 |
| Argentina           | 1995 | 0.852727 | 0.599872 |
| Argentina           | 1996 | 0.864933 | 0.604446 |
| Argentina           | 1997 | 0.887958 | 0.615809 |
| Argentina           | 1998 | 0.911821 | 0.626255 |
| Argentina           | 1999 | 0.926667 | 0.630847 |
| Argentina           | 2000 | 0.937797 | 0.633938 |

|           |      |          |          |
|-----------|------|----------|----------|
| Argentina | 2001 | 0.936522 | 0.629952 |
| Argentina | 2002 | 0.926919 | 0.620389 |
| Argentina | 2003 | 0.93253  | 0.619629 |
| Argentina | 2004 | 0.932059 | 0.61577  |
| Argentina | 2005 | 0.927467 | 0.611552 |
| Argentina | 2006 | 0.939197 | 0.617824 |
| Argentina | 2007 | 0.941492 | 0.617118 |
| Argentina | 2008 | 0.95441  | 0.62448  |
| Argentina | 2009 | 0.959719 | 0.625646 |
| Argentina | 2010 | 0.973276 | 0.629635 |
| Argentina | 2011 | 0.975477 | 0.628524 |
| Argentina | 2012 | 0.967782 | 0.622803 |
| Argentina | 2013 | 0.976495 | 0.626864 |
| Argentina | 2014 | 0.98453  | 0.630903 |
| Argentina | 2015 | 0.977509 | 0.626764 |
| Argentina | 2016 | 0.966372 | 0.620702 |
| Argentina | 2017 | 0.958121 | 0.617106 |
| Argentina | 2018 | 0.958598 | 0.622691 |
| Argentina | 2019 | 0.954191 | 0.623212 |
| Armenia   | 1990 | 0.780068 | 0.518728 |
| Armenia   | 1991 | 0.765191 | 0.508548 |
| Armenia   | 1992 | 0.777493 | 0.518524 |
| Armenia   | 1993 | 0.769502 | 0.514966 |
| Armenia   | 1994 | 0.767158 | 0.520619 |
| Armenia   | 1995 | 0.837447 | 0.570209 |



|           |      |          |          |
|-----------|------|----------|----------|
| Armenia   | 1996 | 0.883948 | 0.61161  |
| Armenia   | 1997 | 0.932501 | 0.658905 |
| Armenia   | 1998 | 0.992186 | 0.709891 |
| Armenia   | 1999 | 0.977642 | 0.704145 |
| Armenia   | 2000 | 0.989377 | 0.713448 |
| Armenia   | 2001 | 0.993407 | 0.722184 |
| Armenia   | 2002 | 0.975439 | 0.707534 |
| Armenia   | 2003 | 0.984779 | 0.705606 |
| Armenia   | 2004 | 0.973642 | 0.687817 |
| Armenia   | 2005 | 0.955851 | 0.670541 |
| Armenia   | 2006 | 0.928028 | 0.650275 |
| Armenia   | 2007 | 1.000884 | 0.697835 |
| Armenia   | 2008 | 0.930024 | 0.654575 |
| Armenia   | 2009 | 0.907739 | 0.639381 |
| Armenia   | 2010 | 0.891967 | 0.618215 |
| Armenia   | 2011 | 0.858252 | 0.593996 |
| Armenia   | 2012 | 0.895746 | 0.620641 |
| Armenia   | 2013 | 0.90243  | 0.62339  |
| Armenia   | 2014 | 0.879924 | 0.604729 |
| Armenia   | 2015 | 0.827098 | 0.568261 |
| Armenia   | 2016 | 0.836569 | 0.574202 |
| Armenia   | 2017 | 0.838073 | 0.573061 |
| Armenia   | 2018 | 0.837492 | 0.569781 |
| Armenia   | 2019 | 0.833053 | 0.566864 |
| Australia | 1990 | 1.294494 | 0.755478 |

|           |      |          |          |
|-----------|------|----------|----------|
| Australia | 1991 | 1.288997 | 0.756474 |
| Australia | 1992 | 1.268926 | 0.745579 |
| Australia | 1993 | 1.241153 | 0.728202 |
| Australia | 1994 | 1.226829 | 0.71809  |
| Australia | 1995 | 1.231699 | 0.722381 |
| Australia | 1996 | 1.205226 | 0.709841 |
| Australia | 1997 | 1.191066 | 0.708118 |
| Australia | 1998 | 1.152601 | 0.688628 |
| Australia | 1999 | 1.152189 | 0.689831 |
| Australia | 2000 | 1.138176 | 0.683865 |
| Australia | 2001 | 1.12561  | 0.679441 |
| Australia | 2002 | 1.117703 | 0.674985 |
| Australia | 2003 | 1.095849 | 0.664528 |
| Australia | 2004 | 1.115103 | 0.677657 |
| Australia | 2005 | 1.135883 | 0.692902 |
| Australia | 2006 | 1.143659 | 0.700868 |
| Australia | 2007 | 1.154737 | 0.713041 |
| Australia | 2008 | 1.155029 | 0.717956 |
| Australia | 2009 | 1.164055 | 0.73019  |
| Australia | 2010 | 1.152713 | 0.728706 |
| Australia | 2011 | 1.141979 | 0.729099 |
| Australia | 2012 | 1.137162 | 0.734577 |
| Australia | 2013 | 1.125903 | 0.736751 |
| Australia | 2014 | 1.120436 | 0.740431 |
| Australia | 2015 | 1.10876  | 0.740356 |

|           |      |          |          |
|-----------|------|----------|----------|
| Australia | 2016 | 1.102751 | 0.742331 |
| Australia | 2017 | 1.080546 | 0.734664 |
| Australia | 2018 | 1.068638 | 0.734484 |
| Australia | 2019 | 1.053569 | 0.730815 |
| Austria   | 1990 | 1.516235 | 0.715717 |
| Austria   | 1991 | 1.500515 | 0.705711 |
| Austria   | 1992 | 1.491132 | 0.697389 |
| Austria   | 1993 | 1.491922 | 0.696126 |
| Austria   | 1994 | 1.498083 | 0.695299 |
| Austria   | 1995 | 1.517538 | 0.698785 |
| Austria   | 1996 | 1.50472  | 0.689712 |
| Austria   | 1997 | 1.501237 | 0.682791 |
| Austria   | 1998 | 1.494367 | 0.680545 |
| Austria   | 1999 | 1.525297 | 0.695688 |
| Austria   | 2000 | 1.552982 | 0.710282 |
| Austria   | 2001 | 1.556454 | 0.717181 |
| Austria   | 2002 | 1.552057 | 0.722238 |
| Austria   | 2003 | 1.575332 | 0.743031 |
| Austria   | 2004 | 1.543781 | 0.734121 |
| Austria   | 2005 | 1.566323 | 0.744065 |
| Austria   | 2006 | 1.565154 | 0.746048 |
| Austria   | 2007 | 1.574945 | 0.754747 |
| Austria   | 2008 | 1.579287 | 0.761531 |
| Austria   | 2009 | 1.5496   | 0.756153 |
| Austria   | 2010 | 1.565489 | 0.765797 |

|            |      |          |          |
|------------|------|----------|----------|
| Austria    | 2011 | 1.588252 | 0.779744 |
| Austria    | 2012 | 1.601134 | 0.789644 |
| Austria    | 2013 | 1.61478  | 0.803998 |
| Austria    | 2014 | 1.618171 | 0.816704 |
| Austria    | 2015 | 1.585412 | 0.805686 |
| Austria    | 2016 | 1.587994 | 0.814803 |
| Austria    | 2017 | 1.567843 | 0.81588  |
| Austria    | 2018 | 1.545369 | 0.82056  |
| Austria    | 2019 | 1.510565 | 0.817641 |
| Azerbaijan | 1990 | 0.884919 | 0.65096  |
| Azerbaijan | 1991 | 0.863564 | 0.647523 |
| Azerbaijan | 1992 | 0.804415 | 0.631196 |
| Azerbaijan | 1993 | 0.807115 | 0.640708 |
| Azerbaijan | 1994 | 0.824097 | 0.657869 |
| Azerbaijan | 1995 | 0.899597 | 0.689805 |
| Azerbaijan | 1996 | 0.926688 | 0.699384 |
| Azerbaijan | 1997 | 0.933708 | 0.708992 |
| Azerbaijan | 1998 | 0.951881 | 0.72596  |
| Azerbaijan | 1999 | 0.959192 | 0.7351   |
| Azerbaijan | 2000 | 0.953873 | 0.735509 |
| Azerbaijan | 2001 | 0.94505  | 0.732781 |
| Azerbaijan | 2002 | 0.929063 | 0.726587 |
| Azerbaijan | 2003 | 0.922196 | 0.729547 |
| Azerbaijan | 2004 | 0.911869 | 0.736815 |
| Azerbaijan | 2005 | 0.903185 | 0.741571 |

|            |      |          |          |
|------------|------|----------|----------|
| Azerbaijan | 2006 | 0.897948 | 0.739822 |
| Azerbaijan | 2007 | 0.893294 | 0.736339 |
| Azerbaijan | 2008 | 0.88655  | 0.739216 |
| Azerbaijan | 2009 | 0.895969 | 0.749957 |
| Azerbaijan | 2010 | 0.897182 | 0.756723 |
| Azerbaijan | 2011 | 0.886579 | 0.749297 |
| Azerbaijan | 2012 | 0.889392 | 0.748078 |
| Azerbaijan | 2013 | 0.896214 | 0.759684 |
| Azerbaijan | 2014 | 0.915751 | 0.771163 |
| Azerbaijan | 2015 | 0.928454 | 0.781904 |
| Azerbaijan | 2016 | 0.941756 | 0.786452 |
| Azerbaijan | 2017 | 0.948794 | 0.792003 |
| Azerbaijan | 2018 | 0.959219 | 0.807247 |
| Azerbaijan | 2019 | 0.964069 | 0.81359  |
| Bahamas    | 1990 | 0.86923  | 0.637024 |
| Bahamas    | 1991 | 0.873246 | 0.641249 |
| Bahamas    | 1992 | 0.886863 | 0.654543 |
| Bahamas    | 1993 | 0.874838 | 0.651853 |
| Bahamas    | 1994 | 0.865065 | 0.646329 |
| Bahamas    | 1995 | 0.858317 | 0.644723 |
| Bahamas    | 1996 | 0.882475 | 0.662296 |
| Bahamas    | 1997 | 0.890227 | 0.668356 |
| Bahamas    | 1998 | 0.896911 | 0.667434 |
| Bahamas    | 1999 | 0.913152 | 0.670192 |
| Bahamas    | 2000 | 0.946792 | 0.688855 |

|         |      |          |          |
|---------|------|----------|----------|
| Bahamas | 2001 | 0.933287 | 0.683256 |
| Bahamas | 2002 | 0.961431 | 0.708425 |
| Bahamas | 2003 | 0.980276 | 0.723078 |
| Bahamas | 2004 | 0.969473 | 0.729096 |
| Bahamas | 2005 | 0.976416 | 0.747939 |
| Bahamas | 2006 | 0.965569 | 0.746845 |
| Bahamas | 2007 | 0.959604 | 0.750593 |
| Bahamas | 2008 | 0.937636 | 0.735607 |
| Bahamas | 2009 | 0.95849  | 0.756095 |
| Bahamas | 2010 | 0.962004 | 0.755122 |
| Bahamas | 2011 | 0.94786  | 0.745734 |
| Bahamas | 2012 | 0.940035 | 0.743227 |
| Bahamas | 2013 | 0.993174 | 0.800607 |
| Bahamas | 2014 | 0.966604 | 0.786467 |
| Bahamas | 2015 | 0.93935  | 0.758471 |
| Bahamas | 2016 | 0.934359 | 0.754261 |
| Bahamas | 2017 | 0.929223 | 0.75145  |
| Bahamas | 2018 | 0.912342 | 0.733095 |
| Bahamas | 2019 | 0.901126 | 0.718165 |
| Bahrain | 1990 | 0.96846  | 1.011246 |
| Bahrain | 1991 | 0.955936 | 0.993367 |
| Bahrain | 1992 | 0.958204 | 1.008735 |
| Bahrain | 1993 | 0.960542 | 1.032361 |
| Bahrain | 1994 | 0.914769 | 0.98154  |
| Bahrain | 1995 | 0.867259 | 0.918159 |

|            |      |          |          |
|------------|------|----------|----------|
| Bahrain    | 1996 | 0.880086 | 0.927939 |
| Bahrain    | 1997 | 0.841479 | 0.867421 |
| Bahrain    | 1998 | 0.897658 | 0.909906 |
| Bahrain    | 1999 | 0.990692 | 1.012986 |
| Bahrain    | 2000 | 0.997978 | 1.079099 |
| Bahrain    | 2001 | 0.962072 | 1.099497 |
| Bahrain    | 2002 | 0.944778 | 1.025992 |
| Bahrain    | 2003 | 0.88681  | 0.932096 |
| Bahrain    | 2004 | 0.893684 | 0.94323  |
| Bahrain    | 2005 | 0.879997 | 0.951966 |
| Bahrain    | 2006 | 0.845168 | 0.936137 |
| Bahrain    | 2007 | 0.816137 | 0.921743 |
| Bahrain    | 2008 | 0.771081 | 0.894059 |
| Bahrain    | 2009 | 0.739982 | 0.877059 |
| Bahrain    | 2010 | 0.703531 | 0.858101 |
| Bahrain    | 2011 | 0.690148 | 0.841018 |
| Bahrain    | 2012 | 0.696111 | 0.81503  |
| Bahrain    | 2013 | 0.724384 | 0.856791 |
| Bahrain    | 2014 | 0.754134 | 0.915374 |
| Bahrain    | 2015 | 0.761763 | 0.942064 |
| Bahrain    | 2016 | 0.781626 | 0.985433 |
| Bahrain    | 2017 | 0.787411 | 1.010453 |
| Bahrain    | 2018 | 0.761454 | 0.999448 |
| Bahrain    | 2019 | 0.75058  | 1.006894 |
| Bangladesh | 1990 | 0.3804   | 0.716382 |

|            |      |          |          |
|------------|------|----------|----------|
| Bangladesh | 1991 | 0.375512 | 0.70697  |
| Bangladesh | 1992 | 0.395376 | 0.732929 |
| Bangladesh | 1993 | 0.404917 | 0.739799 |
| Bangladesh | 1994 | 0.4091   | 0.741698 |
| Bangladesh | 1995 | 0.419216 | 0.749634 |
| Bangladesh | 1996 | 0.415382 | 0.737888 |
| Bangladesh | 1997 | 0.41797  | 0.73412  |
| Bangladesh | 1998 | 0.43435  | 0.780599 |
| Bangladesh | 1999 | 0.454088 | 0.839102 |
| Bangladesh | 2000 | 0.453657 | 0.843641 |
| Bangladesh | 2001 | 0.459795 | 0.853859 |
| Bangladesh | 2002 | 0.467849 | 0.862316 |
| Bangladesh | 2003 | 0.464491 | 0.839155 |
| Bangladesh | 2004 | 0.462154 | 0.815733 |
| Bangladesh | 2005 | 0.466528 | 0.798544 |
| Bangladesh | 2006 | 0.46469  | 0.773923 |
| Bangladesh | 2007 | 0.454664 | 0.734806 |
| Bangladesh | 2008 | 0.464322 | 0.733483 |
| Bangladesh | 2009 | 0.490683 | 0.758337 |
| Bangladesh | 2010 | 0.52175  | 0.778736 |
| Bangladesh | 2011 | 0.542118 | 0.797312 |
| Bangladesh | 2012 | 0.565715 | 0.822096 |
| Bangladesh | 2013 | 0.586354 | 0.836184 |
| Bangladesh | 2014 | 0.60748  | 0.848881 |
| Bangladesh | 2015 | 0.637512 | 0.868537 |



|            |      |          |          |
|------------|------|----------|----------|
| Bangladesh | 2016 | 0.660278 | 0.882671 |
| Bangladesh | 2017 | 0.678338 | 0.88952  |
| Bangladesh | 2018 | 0.698971 | 0.899008 |
| Bangladesh | 2019 | 0.718894 | 0.907048 |
| Barbados   | 1990 | 0.894527 | 0.616642 |
| Barbados   | 1991 | 0.905157 | 0.626068 |
| Barbados   | 1992 | 0.886093 | 0.614058 |
| Barbados   | 1993 | 0.840365 | 0.584046 |
| Barbados   | 1994 | 0.798121 | 0.552412 |
| Barbados   | 1995 | 0.797847 | 0.547842 |
| Barbados   | 1996 | 0.802923 | 0.548148 |
| Barbados   | 1997 | 0.829481 | 0.563764 |
| Barbados   | 1998 | 0.91285  | 0.619466 |
| Barbados   | 1999 | 1.051021 | 0.713134 |
| Barbados   | 2000 | 1.129813 | 0.771219 |
| Barbados   | 2001 | 1.164329 | 0.804694 |
| Barbados   | 2002 | 1.098412 | 0.766947 |
| Barbados   | 2003 | 1.060014 | 0.743981 |
| Barbados   | 2004 | 1.049906 | 0.73631  |
| Barbados   | 2005 | 1.035049 | 0.730984 |
| Barbados   | 2006 | 1.025381 | 0.726048 |
| Barbados   | 2007 | 1.03494  | 0.730463 |
| Barbados   | 2008 | 1.071119 | 0.755906 |
| Barbados   | 2009 | 1.186422 | 0.840113 |
| Barbados   | 2010 | 1.20559  | 0.861409 |

|          |      |          |          |
|----------|------|----------|----------|
| Barbados | 2011 | 1.256207 | 0.903078 |
| Barbados | 2012 | 1.232002 | 0.894855 |
| Barbados | 2013 | 1.244512 | 0.910245 |
| Barbados | 2014 | 1.226329 | 0.90563  |
| Barbados | 2015 | 1.219095 | 0.909021 |
| Barbados | 2016 | 1.20731  | 0.908776 |
| Barbados | 2017 | 1.18224  | 0.898411 |
| Barbados | 2018 | 1.136632 | 0.87408  |
| Barbados | 2019 | 1.057898 | 0.823784 |
| Belarus  | 1990 | 1.222737 | 0.546785 |
| Belarus  | 1991 | 1.222589 | 0.542306 |
| Belarus  | 1992 | 1.222354 | 0.541995 |
| Belarus  | 1993 | 1.194195 | 0.528192 |
| Belarus  | 1994 | 1.198027 | 0.525786 |
| Belarus  | 1995 | 1.190682 | 0.524236 |
| Belarus  | 1996 | 1.19779  | 0.529672 |
| Belarus  | 1997 | 1.201862 | 0.530403 |
| Belarus  | 1998 | 1.180566 | 0.522256 |
| Belarus  | 1999 | 1.17349  | 0.525554 |
| Belarus  | 2000 | 1.181038 | 0.537008 |
| Belarus  | 2001 | 1.11243  | 0.527535 |
| Belarus  | 2002 | 0.992516 | 0.514932 |
| Belarus  | 2003 | 0.965662 | 0.512927 |
| Belarus  | 2004 | 0.987739 | 0.51748  |
| Belarus  | 2005 | 0.949344 | 0.490265 |

|         |      |          |          |
|---------|------|----------|----------|
| Belarus | 2006 | 0.967082 | 0.492058 |
| Belarus | 2007 | 1.016222 | 0.523081 |
| Belarus | 2008 | 0.997675 | 0.511675 |
| Belarus | 2009 | 1.034343 | 0.52553  |
| Belarus | 2010 | 1.035253 | 0.522242 |
| Belarus | 2011 | 1.052963 | 0.526143 |
| Belarus | 2012 | 1.118591 | 0.540565 |
| Belarus | 2013 | 1.163733 | 0.552405 |
| Belarus | 2014 | 1.170396 | 0.54707  |
| Belarus | 2015 | 1.17895  | 0.546572 |
| Belarus | 2016 | 1.200354 | 0.553718 |
| Belarus | 2017 | 1.181    | 0.545909 |
| Belarus | 2018 | 1.181577 | 0.547002 |
| Belarus | 2019 | 1.173258 | 0.544368 |
| Belgium | 1990 | 1.421385 | 0.740877 |
| Belgium | 1991 | 1.423942 | 0.735281 |
| Belgium | 1992 | 1.445789 | 0.734188 |
| Belgium | 1993 | 1.462333 | 0.731138 |
| Belgium | 1994 | 1.49978  | 0.74798  |
| Belgium | 1995 | 1.496972 | 0.743446 |
| Belgium | 1996 | 1.496832 | 0.734692 |
| Belgium | 1997 | 1.509634 | 0.737004 |
| Belgium | 1998 | 1.514908 | 0.74002  |
| Belgium | 1999 | 1.502728 | 0.733028 |
| Belgium | 2000 | 1.557667 | 0.760407 |

|         |      |          |          |
|---------|------|----------|----------|
| Belgium | 2001 | 1.583938 | 0.775911 |
| Belgium | 2002 | 1.586992 | 0.779042 |
| Belgium | 2003 | 1.581673 | 0.780405 |
| Belgium | 2004 | 1.568962 | 0.781184 |
| Belgium | 2005 | 1.5535   | 0.78059  |
| Belgium | 2006 | 1.536952 | 0.778674 |
| Belgium | 2007 | 1.518508 | 0.773984 |
| Belgium | 2008 | 1.485609 | 0.766927 |
| Belgium | 2009 | 1.472726 | 0.767742 |
| Belgium | 2010 | 1.455233 | 0.765906 |
| Belgium | 2011 | 1.438783 | 0.760722 |
| Belgium | 2012 | 1.407827 | 0.747317 |
| Belgium | 2013 | 1.420968 | 0.757718 |
| Belgium | 2014 | 1.426814 | 0.762059 |
| Belgium | 2015 | 1.453753 | 0.777867 |
| Belgium | 2016 | 1.443727 | 0.774551 |
| Belgium | 2017 | 1.418192 | 0.768017 |
| Belgium | 2018 | 1.412215 | 0.771966 |
| Belgium | 2019 | 1.395084 | 0.770581 |
| Belize  | 1990 | 1.00662  | 0.972825 |
| Belize  | 1991 | 0.965362 | 0.94683  |
| Belize  | 1992 | 0.931144 | 0.91186  |
| Belize  | 1993 | 0.932714 | 0.918929 |
| Belize  | 1994 | 0.931709 | 0.919944 |
| Belize  | 1995 | 0.88969  | 0.890978 |

|        |      |          |          |
|--------|------|----------|----------|
| Belize | 1996 | 0.867909 | 0.868761 |
| Belize | 1997 | 0.814316 | 0.808436 |
| Belize | 1998 | 0.749212 | 0.736919 |
| Belize | 1999 | 0.714264 | 0.689447 |
| Belize | 2000 | 0.743064 | 0.711691 |
| Belize | 2001 | 0.79908  | 0.763506 |
| Belize | 2002 | 0.851249 | 0.81938  |
| Belize | 2003 | 0.884077 | 0.854598 |
| Belize | 2004 | 0.886352 | 0.861362 |
| Belize | 2005 | 0.904799 | 0.880318 |
| Belize | 2006 | 0.936253 | 0.920596 |
| Belize | 2007 | 0.939889 | 0.93118  |
| Belize | 2008 | 0.921785 | 0.919071 |
| Belize | 2009 | 0.920857 | 0.923895 |
| Belize | 2010 | 0.915009 | 0.919982 |
| Belize | 2011 | 0.925972 | 0.936544 |
| Belize | 2012 | 0.928028 | 0.938017 |
| Belize | 2013 | 0.940011 | 0.951449 |
| Belize | 2014 | 0.926192 | 0.934737 |
| Belize | 2015 | 0.870335 | 0.87185  |
| Belize | 2016 | 0.849205 | 0.852208 |
| Belize | 2017 | 0.845053 | 0.848611 |
| Belize | 2018 | 0.837958 | 0.836727 |
| Belize | 2019 | 0.830969 | 0.825455 |
| Benin  | 1990 | 0.79431  | 0.718407 |

|       |      |          |          |
|-------|------|----------|----------|
| Benin | 1991 | 0.787919 | 0.71165  |
| Benin | 1992 | 0.789963 | 0.712579 |
| Benin | 1993 | 0.792025 | 0.710205 |
| Benin | 1994 | 0.794905 | 0.70809  |
| Benin | 1995 | 0.79705  | 0.707537 |
| Benin | 1996 | 0.797238 | 0.702469 |
| Benin | 1997 | 0.79723  | 0.69874  |
| Benin | 1998 | 0.792817 | 0.690638 |
| Benin | 1999 | 0.787169 | 0.680281 |
| Benin | 2000 | 0.789476 | 0.67662  |
| Benin | 2001 | 0.791888 | 0.674468 |
| Benin | 2002 | 0.795861 | 0.672453 |
| Benin | 2003 | 0.805334 | 0.676195 |
| Benin | 2004 | 0.820154 | 0.684018 |
| Benin | 2005 | 0.837154 | 0.694794 |
| Benin | 2006 | 0.854647 | 0.70472  |
| Benin | 2007 | 0.870698 | 0.715176 |
| Benin | 2008 | 0.864989 | 0.708258 |
| Benin | 2009 | 0.861007 | 0.704984 |
| Benin | 2010 | 0.856749 | 0.700102 |
| Benin | 2011 | 0.848411 | 0.694153 |
| Benin | 2012 | 0.842619 | 0.6896   |
| Benin | 2013 | 0.831281 | 0.682766 |
| Benin | 2014 | 0.834141 | 0.686071 |
| Benin | 2015 | 0.836716 | 0.687831 |

|         |      |          |          |
|---------|------|----------|----------|
| Benin   | 2016 | 0.841937 | 0.693924 |
| Benin   | 2017 | 0.845774 | 0.698568 |
| Benin   | 2018 | 0.84839  | 0.702366 |
| Benin   | 2019 | 0.84808  | 0.705069 |
| Bermuda | 1990 | 0.754029 | 0.536264 |
| Bermuda | 1991 | 0.779454 | 0.553886 |
| Bermuda | 1992 | 0.840547 | 0.599338 |
| Bermuda | 1993 | 0.854096 | 0.607478 |
| Bermuda | 1994 | 0.872814 | 0.618957 |
| Bermuda | 1995 | 0.898129 | 0.634928 |
| Bermuda | 1996 | 0.888039 | 0.626096 |
| Bermuda | 1997 | 0.889982 | 0.625837 |
| Bermuda | 1998 | 0.898389 | 0.629455 |
| Bermuda | 1999 | 0.901327 | 0.628074 |
| Bermuda | 2000 | 0.917436 | 0.635426 |
| Bermuda | 2001 | 0.930333 | 0.644094 |
| Bermuda | 2002 | 0.916068 | 0.634163 |
| Bermuda | 2003 | 0.872629 | 0.604624 |
| Bermuda | 2004 | 0.847269 | 0.587719 |
| Bermuda | 2005 | 0.818464 | 0.567361 |
| Bermuda | 2006 | 0.787899 | 0.546584 |
| Bermuda | 2007 | 0.77141  | 0.533994 |
| Bermuda | 2008 | 0.766299 | 0.528829 |
| Bermuda | 2009 | 0.771124 | 0.5311   |
| Bermuda | 2010 | 0.759957 | 0.523274 |

|         |      |          |          |
|---------|------|----------|----------|
| Bermuda | 2011 | 0.75285  | 0.518281 |
| Bermuda | 2012 | 0.746253 | 0.51245  |
| Bermuda | 2013 | 0.749626 | 0.513518 |
| Bermuda | 2014 | 0.757856 | 0.518891 |
| Bermuda | 2015 | 0.769205 | 0.52558  |
| Bermuda | 2016 | 0.777422 | 0.531834 |
| Bermuda | 2017 | 0.777963 | 0.532703 |
| Bermuda | 2018 | 0.776396 | 0.531267 |
| Bermuda | 2019 | 0.774579 | 0.529411 |
| Bhutan  | 1990 | 1.150997 | 0.961563 |
| Bhutan  | 1991 | 1.159768 | 0.976396 |
| Bhutan  | 1992 | 1.161489 | 0.988481 |
| Bhutan  | 1993 | 1.162582 | 1.002648 |
| Bhutan  | 1994 | 1.16165  | 1.015731 |
| Bhutan  | 1995 | 1.161533 | 1.029975 |
| Bhutan  | 1996 | 1.155882 | 1.038013 |
| Bhutan  | 1997 | 1.14839  | 1.044638 |
| Bhutan  | 1998 | 1.132276 | 1.043871 |
| Bhutan  | 1999 | 1.117843 | 1.044833 |
| Bhutan  | 2000 | 1.104612 | 1.044609 |
| Bhutan  | 2001 | 1.082835 | 1.036621 |
| Bhutan  | 2002 | 1.060601 | 1.028499 |
| Bhutan  | 2003 | 1.048045 | 1.026816 |
| Bhutan  | 2004 | 1.048342 | 1.036155 |
| Bhutan  | 2005 | 1.045514 | 1.041306 |



|                                  |      |          |          |
|----------------------------------|------|----------|----------|
| Bhutan                           | 2006 | 1.040212 | 1.045284 |
| Bhutan                           | 2007 | 1.04562  | 1.054329 |
| Bhutan                           | 2008 | 1.020866 | 1.035328 |
| Bhutan                           | 2009 | 0.990419 | 1.00997  |
| Bhutan                           | 2010 | 0.976659 | 0.999512 |
| Bhutan                           | 2011 | 0.963328 | 0.988538 |
| Bhutan                           | 2012 | 0.954794 | 0.981532 |
| Bhutan                           | 2013 | 0.951871 | 0.978607 |
| Bhutan                           | 2014 | 0.951886 | 0.977927 |
| Bhutan                           | 2015 | 0.944963 | 0.969948 |
| Bhutan                           | 2016 | 0.93875  | 0.962066 |
| Bhutan                           | 2017 | 0.941255 | 0.962716 |
| Bhutan                           | 2018 | 0.945337 | 0.964172 |
| Bhutan                           | 2019 | 0.95056  | 0.966948 |
| Bolivia (Plurinational State of) | 1990 | 0.961256 | 0.803475 |
| Bolivia (Plurinational State of) | 1991 | 0.974811 | 0.817495 |
| Bolivia (Plurinational State of) | 1992 | 1.002636 | 0.843273 |
| Bolivia (Plurinational State of) | 1993 | 1.017767 | 0.858119 |
| Bolivia (Plurinational State of) | 1994 | 1.033256 | 0.87403  |
| Bolivia (Plurinational State of) | 1995 | 1.024883 | 0.870068 |
| Bolivia (Plurinational State of) | 1996 | 1.017566 | 0.866427 |
| Bolivia (Plurinational State of) | 1997 | 1.007971 | 0.861273 |
| Bolivia (Plurinational State of) | 1998 | 0.984129 | 0.841985 |
| Bolivia (Plurinational State of) | 1999 | 0.966015 | 0.827632 |
| Bolivia (Plurinational State of) | 2000 | 0.962713 | 0.824518 |

|                                  |      |          |          |
|----------------------------------|------|----------|----------|
| Bolivia (Plurinational State of) | 2001 | 0.958932 | 0.820473 |
| Bolivia (Plurinational State of) | 2002 | 0.976256 | 0.835383 |
| Bolivia (Plurinational State of) | 2003 | 0.98302  | 0.842998 |
| Bolivia (Plurinational State of) | 2004 | 0.994413 | 0.853175 |
| Bolivia (Plurinational State of) | 2005 | 1.000176 | 0.857717 |
| Bolivia (Plurinational State of) | 2006 | 0.994393 | 0.853639 |
| Bolivia (Plurinational State of) | 2007 | 1.012508 | 0.870734 |
| Bolivia (Plurinational State of) | 2008 | 1.012945 | 0.872046 |
| Bolivia (Plurinational State of) | 2009 | 1.014013 | 0.874569 |
| Bolivia (Plurinational State of) | 2010 | 1.020693 | 0.882007 |
| Bolivia (Plurinational State of) | 2011 | 1.0303   | 0.892378 |
| Bolivia (Plurinational State of) | 2012 | 1.042369 | 0.905194 |
| Bolivia (Plurinational State of) | 2013 | 1.032939 | 0.899283 |
| Bolivia (Plurinational State of) | 2014 | 1.009051 | 0.880472 |
| Bolivia (Plurinational State of) | 2015 | 1.012061 | 0.885248 |
| Bolivia (Plurinational State of) | 2016 | 1.029472 | 0.902983 |
| Bolivia (Plurinational State of) | 2017 | 1.025379 | 0.901278 |
| Bolivia (Plurinational State of) | 2018 | 1.020638 | 0.898737 |
| Bolivia (Plurinational State of) | 2019 | 1.018462 | 0.897773 |
| Bosnia and Herzegovina           | 1990 | 1.29983  | 0.970983 |
| Bosnia and Herzegovina           | 1991 | 1.288569 | 0.978089 |
| Bosnia and Herzegovina           | 1992 | 1.355309 | 1.027289 |
| Bosnia and Herzegovina           | 1993 | 1.329285 | 0.98292  |
| Bosnia and Herzegovina           | 1994 | 1.34116  | 0.988002 |
| Bosnia and Herzegovina           | 1995 | 1.337425 | 0.976078 |

|                        |      |          |          |
|------------------------|------|----------|----------|
| Bosnia and Herzegovina | 1996 | 1.330841 | 0.969336 |
| Bosnia and Herzegovina | 1997 | 1.386711 | 1.048084 |
| Bosnia and Herzegovina | 1998 | 1.325447 | 0.989462 |
| Bosnia and Herzegovina | 1999 | 1.299408 | 0.931218 |
| Bosnia and Herzegovina | 2000 | 1.218634 | 0.856607 |
| Bosnia and Herzegovina | 2001 | 1.246342 | 0.884627 |
| Bosnia and Herzegovina | 2002 | 1.214282 | 0.851942 |
| Bosnia and Herzegovina | 2003 | 1.13905  | 0.783318 |
| Bosnia and Herzegovina | 2004 | 1.143951 | 0.790536 |
| Bosnia and Herzegovina | 2005 | 1.040577 | 0.726236 |
| Bosnia and Herzegovina | 2006 | 1.06114  | 0.738709 |
| Bosnia and Herzegovina | 2007 | 1.0373   | 0.726447 |
| Bosnia and Herzegovina | 2008 | 1.018065 | 0.713553 |
| Bosnia and Herzegovina | 2009 | 1.009822 | 0.716932 |
| Bosnia and Herzegovina | 2010 | 1.0141   | 0.719194 |
| Bosnia and Herzegovina | 2011 | 0.981583 | 0.69969  |
| Bosnia and Herzegovina | 2012 | 1.005197 | 0.710447 |
| Bosnia and Herzegovina | 2013 | 1.013019 | 0.708952 |
| Bosnia and Herzegovina | 2014 | 1.038881 | 0.725823 |
| Bosnia and Herzegovina | 2015 | 1.049397 | 0.736441 |
| Bosnia and Herzegovina | 2016 | 1.040546 | 0.735288 |
| Bosnia and Herzegovina | 2017 | 1.040503 | 0.737686 |
| Bosnia and Herzegovina | 2018 | 1.04249  | 0.738539 |
| Bosnia and Herzegovina | 2019 | 1.043485 | 0.74054  |
| Botswana               | 1990 | 0.537137 | 0.414065 |

|          |      |          |          |
|----------|------|----------|----------|
| Botswana | 1991 | 0.529932 | 0.411447 |
| Botswana | 1992 | 0.518595 | 0.406089 |
| Botswana | 1993 | 0.500924 | 0.397237 |
| Botswana | 1994 | 0.475532 | 0.382303 |
| Botswana | 1995 | 0.445387 | 0.362409 |
| Botswana | 1996 | 0.411066 | 0.337684 |
| Botswana | 1997 | 0.38692  | 0.317997 |
| Botswana | 1998 | 0.388996 | 0.316316 |
| Botswana | 1999 | 0.399472 | 0.320642 |
| Botswana | 2000 | 0.419352 | 0.331758 |
| Botswana | 2001 | 0.440807 | 0.343843 |
| Botswana | 2002 | 0.462907 | 0.35598  |
| Botswana | 2003 | 0.48127  | 0.365153 |
| Botswana | 2004 | 0.485173 | 0.364081 |
| Botswana | 2005 | 0.486513 | 0.361465 |
| Botswana | 2006 | 0.486971 | 0.359767 |
| Botswana | 2007 | 0.517909 | 0.376773 |
| Botswana | 2008 | 0.56281  | 0.404718 |
| Botswana | 2009 | 0.590041 | 0.421971 |
| Botswana | 2010 | 0.61666  | 0.43976  |
| Botswana | 2011 | 0.650044 | 0.462337 |
| Botswana | 2012 | 0.673408 | 0.478454 |
| Botswana | 2013 | 0.698869 | 0.496157 |
| Botswana | 2014 | 0.729034 | 0.517204 |
| Botswana | 2015 | 0.736907 | 0.525176 |

|          |      |          |          |
|----------|------|----------|----------|
| Botswana | 2016 | 0.736744 | 0.527736 |
| Botswana | 2017 | 0.741796 | 0.534897 |
| Botswana | 2018 | 0.745507 | 0.541574 |
| Botswana | 2019 | 0.749048 | 0.547359 |
| Brazil   | 1990 | 0.868292 | 0.734531 |
| Brazil   | 1991 | 0.871669 | 0.733028 |
| Brazil   | 1992 | 0.873059 | 0.730412 |
| Brazil   | 1993 | 0.870166 | 0.724411 |
| Brazil   | 1994 | 0.872946 | 0.725148 |
| Brazil   | 1995 | 0.888112 | 0.736283 |
| Brazil   | 1996 | 0.901793 | 0.748348 |
| Brazil   | 1997 | 0.912694 | 0.754577 |
| Brazil   | 1998 | 0.915702 | 0.754223 |
| Brazil   | 1999 | 0.920762 | 0.755906 |
| Brazil   | 2000 | 0.923142 | 0.754715 |
| Brazil   | 2001 | 0.92368  | 0.75192  |
| Brazil   | 2002 | 0.926329 | 0.749707 |
| Brazil   | 2003 | 0.914675 | 0.736203 |
| Brazil   | 2004 | 0.908924 | 0.728108 |
| Brazil   | 2005 | 0.909099 | 0.725899 |
| Brazil   | 2006 | 0.914362 | 0.726873 |
| Brazil   | 2007 | 0.917005 | 0.725326 |
| Brazil   | 2008 | 0.919568 | 0.724005 |
| Brazil   | 2009 | 0.926131 | 0.725645 |
| Brazil   | 2010 | 0.929564 | 0.724421 |

|                   |      |          |          |
|-------------------|------|----------|----------|
| Brazil            | 2011 | 0.929337 | 0.72113  |
| Brazil            | 2012 | 0.932485 | 0.720529 |
| Brazil            | 2013 | 0.929513 | 0.715356 |
| Brazil            | 2014 | 0.928064 | 0.711744 |
| Brazil            | 2015 | 0.93     | 0.710368 |
| Brazil            | 2016 | 0.921374 | 0.701534 |
| Brazil            | 2017 | 0.923842 | 0.701841 |
| Brazil            | 2018 | 0.931119 | 0.708035 |
| Brazil            | 2019 | 0.926425 | 0.704651 |
| Brunei Darussalam | 1990 | 0.730035 | 0.53404  |
| Brunei Darussalam | 1991 | 0.74702  | 0.551392 |
| Brunei Darussalam | 1992 | 0.753832 | 0.561922 |
| Brunei Darussalam | 1993 | 0.761973 | 0.573017 |
| Brunei Darussalam | 1994 | 0.802694 | 0.622696 |
| Brunei Darussalam | 1995 | 0.817759 | 0.648665 |
| Brunei Darussalam | 1996 | 0.850126 | 0.700386 |
| Brunei Darussalam | 1997 | 0.894011 | 0.778129 |
| Brunei Darussalam | 1998 | 0.873648 | 0.765259 |
| Brunei Darussalam | 1999 | 0.871369 | 0.763791 |
| Brunei Darussalam | 2000 | 0.894188 | 0.798016 |
| Brunei Darussalam | 2001 | 0.90963  | 0.83227  |
| Brunei Darussalam | 2002 | 0.886411 | 0.780404 |
| Brunei Darussalam | 2003 | 0.854292 | 0.71243  |
| Brunei Darussalam | 2004 | 0.859174 | 0.715514 |
| Brunei Darussalam | 2005 | 0.84762  | 0.690099 |

|                   |      |          |          |
|-------------------|------|----------|----------|
| Brunei Darussalam | 2006 | 0.852917 | 0.685786 |
| Brunei Darussalam | 2007 | 0.882095 | 0.739274 |
| Brunei Darussalam | 2008 | 0.862392 | 0.697695 |
| Brunei Darussalam | 2009 | 0.856274 | 0.659067 |
| Brunei Darussalam | 2010 | 0.855225 | 0.645933 |
| Brunei Darussalam | 2011 | 0.874377 | 0.639123 |
| Brunei Darussalam | 2012 | 0.893294 | 0.618207 |
| Brunei Darussalam | 2013 | 0.887434 | 0.591531 |
| Brunei Darussalam | 2014 | 0.889551 | 0.570037 |
| Brunei Darussalam | 2015 | 0.908183 | 0.567185 |
| Brunei Darussalam | 2016 | 0.908363 | 0.560784 |
| Brunei Darussalam | 2017 | 0.899665 | 0.555    |
| Brunei Darussalam | 2018 | 0.897283 | 0.547615 |
| Brunei Darussalam | 2019 | 0.897071 | 0.549288 |
| Bulgaria          | 1990 | 0.784462 | 0.633343 |
| Bulgaria          | 1991 | 0.8026   | 0.650828 |
| Bulgaria          | 1992 | 0.791893 | 0.644128 |
| Bulgaria          | 1993 | 0.768757 | 0.619671 |
| Bulgaria          | 1994 | 0.766644 | 0.616116 |
| Bulgaria          | 1995 | 0.784155 | 0.626033 |
| Bulgaria          | 1996 | 0.792337 | 0.62834  |
| Bulgaria          | 1997 | 0.81624  | 0.64351  |
| Bulgaria          | 1998 | 0.810752 | 0.633696 |
| Bulgaria          | 1999 | 0.84948  | 0.659797 |
| Bulgaria          | 2000 | 0.827353 | 0.634195 |

|              |      |          |          |
|--------------|------|----------|----------|
| Bulgaria     | 2001 | 0.799274 | 0.605875 |
| Bulgaria     | 2002 | 0.784054 | 0.590177 |
| Bulgaria     | 2003 | 0.761885 | 0.573417 |
| Bulgaria     | 2004 | 0.750577 | 0.563872 |
| Bulgaria     | 2005 | 0.737531 | 0.550685 |
| Bulgaria     | 2006 | 0.740673 | 0.551365 |
| Bulgaria     | 2007 | 0.742368 | 0.548454 |
| Bulgaria     | 2008 | 0.735157 | 0.539766 |
| Bulgaria     | 2009 | 0.733233 | 0.536161 |
| Bulgaria     | 2010 | 0.744196 | 0.543393 |
| Bulgaria     | 2011 | 0.738048 | 0.535808 |
| Bulgaria     | 2012 | 0.742174 | 0.534777 |
| Bulgaria     | 2013 | 0.748018 | 0.538745 |
| Bulgaria     | 2014 | 0.757692 | 0.54565  |
| Bulgaria     | 2015 | 0.768527 | 0.55158  |
| Bulgaria     | 2016 | 0.751909 | 0.541118 |
| Bulgaria     | 2017 | 0.748123 | 0.537571 |
| Bulgaria     | 2018 | 0.757731 | 0.540935 |
| Bulgaria     | 2019 | 0.759446 | 0.540909 |
| Burkina Faso | 1990 | 0.829528 | 0.714538 |
| Burkina Faso | 1991 | 0.822189 | 0.708491 |
| Burkina Faso | 1992 | 0.828201 | 0.71154  |
| Burkina Faso | 1993 | 0.826131 | 0.708344 |
| Burkina Faso | 1994 | 0.828671 | 0.709142 |
| Burkina Faso | 1995 | 0.832397 | 0.710774 |



|              |      |          |          |
|--------------|------|----------|----------|
| Burkina Faso | 1996 | 0.840602 | 0.718042 |
| Burkina Faso | 1997 | 0.855196 | 0.729615 |
| Burkina Faso | 1998 | 0.864386 | 0.736372 |
| Burkina Faso | 1999 | 0.878543 | 0.745592 |
| Burkina Faso | 2000 | 0.896482 | 0.757597 |
| Burkina Faso | 2001 | 0.900208 | 0.758025 |
| Burkina Faso | 2002 | 0.911224 | 0.761005 |
| Burkina Faso | 2003 | 0.922792 | 0.770118 |
| Burkina Faso | 2004 | 0.93218  | 0.777212 |
| Burkina Faso | 2005 | 0.936739 | 0.780345 |
| Burkina Faso | 2006 | 0.941423 | 0.78412  |
| Burkina Faso | 2007 | 0.937418 | 0.779712 |
| Burkina Faso | 2008 | 0.932447 | 0.771837 |
| Burkina Faso | 2009 | 0.932103 | 0.767737 |
| Burkina Faso | 2010 | 0.933339 | 0.766071 |
| Burkina Faso | 2011 | 0.936167 | 0.762728 |
| Burkina Faso | 2012 | 0.933527 | 0.758505 |
| Burkina Faso | 2013 | 0.934327 | 0.753482 |
| Burkina Faso | 2014 | 0.946187 | 0.758672 |
| Burkina Faso | 2015 | 0.965308 | 0.770071 |
| Burkina Faso | 2016 | 0.981429 | 0.778676 |
| Burkina Faso | 2017 | 0.997016 | 0.7884   |
| Burkina Faso | 2018 | 1.006615 | 0.794704 |
| Burkina Faso | 2019 | 1.016562 | 0.801219 |
| Burundi      | 1990 | 0.687664 | 0.563286 |

|         |      |          |          |
|---------|------|----------|----------|
| Burundi | 1991 | 0.694366 | 0.567374 |
| Burundi | 1992 | 0.699582 | 0.571893 |
| Burundi | 1993 | 0.698081 | 0.573959 |
| Burundi | 1994 | 0.696463 | 0.575131 |
| Burundi | 1995 | 0.698699 | 0.57815  |
| Burundi | 1996 | 0.712302 | 0.591291 |
| Burundi | 1997 | 0.719895 | 0.601894 |
| Burundi | 1998 | 0.728608 | 0.614085 |
| Burundi | 1999 | 0.737929 | 0.625256 |
| Burundi | 2000 | 0.734877 | 0.628305 |
| Burundi | 2001 | 0.734869 | 0.631386 |
| Burundi | 2002 | 0.733492 | 0.633296 |
| Burundi | 2003 | 0.733389 | 0.637925 |
| Burundi | 2004 | 0.729231 | 0.640778 |
| Burundi | 2005 | 0.718246 | 0.63823  |
| Burundi | 2006 | 0.703513 | 0.630502 |
| Burundi | 2007 | 0.683863 | 0.619678 |
| Burundi | 2008 | 0.666624 | 0.612776 |
| Burundi | 2009 | 0.663426 | 0.614655 |
| Burundi | 2010 | 0.660953 | 0.616004 |
| Burundi | 2011 | 0.656466 | 0.616586 |
| Burundi | 2012 | 0.654089 | 0.619867 |
| Burundi | 2013 | 0.652141 | 0.622567 |
| Burundi | 2014 | 0.6494   | 0.625271 |
| Burundi | 2015 | 0.644695 | 0.62811  |

|            |      |          |          |
|------------|------|----------|----------|
| Burundi    | 2016 | 0.636883 | 0.629837 |
| Burundi    | 2017 | 0.631132 | 0.632785 |
| Burundi    | 2018 | 0.628577 | 0.636035 |
| Burundi    | 2019 | 0.624937 | 0.639786 |
| Cabo Verde | 1990 | 0.785566 | 0.5739   |
| Cabo Verde | 1991 | 0.799078 | 0.581168 |
| Cabo Verde | 1992 | 0.800885 | 0.580711 |
| Cabo Verde | 1993 | 0.780252 | 0.565062 |
| Cabo Verde | 1994 | 0.769012 | 0.55496  |
| Cabo Verde | 1995 | 0.760016 | 0.546382 |
| Cabo Verde | 1996 | 0.725456 | 0.51886  |
| Cabo Verde | 1997 | 0.676563 | 0.479908 |
| Cabo Verde | 1998 | 0.676536 | 0.473741 |
| Cabo Verde | 1999 | 0.676218 | 0.467118 |
| Cabo Verde | 2000 | 0.68503  | 0.466719 |
| Cabo Verde | 2001 | 0.686608 | 0.46229  |
| Cabo Verde | 2002 | 0.688755 | 0.458328 |
| Cabo Verde | 2003 | 0.690284 | 0.453906 |
| Cabo Verde | 2004 | 0.687477 | 0.446744 |
| Cabo Verde | 2005 | 0.684518 | 0.439673 |
| Cabo Verde | 2006 | 0.777244 | 0.500204 |
| Cabo Verde | 2007 | 0.816068 | 0.528048 |
| Cabo Verde | 2008 | 0.819805 | 0.532151 |
| Cabo Verde | 2009 | 0.824293 | 0.537742 |
| Cabo Verde | 2010 | 0.83081  | 0.546195 |

|            |      |          |          |
|------------|------|----------|----------|
| Cabo Verde | 2011 | 0.853879 | 0.565047 |
| Cabo Verde | 2012 | 0.875334 | 0.583896 |
| Cabo Verde | 2013 | 0.871868 | 0.58662  |
| Cabo Verde | 2014 | 0.904058 | 0.616563 |
| Cabo Verde | 2015 | 0.942277 | 0.652128 |
| Cabo Verde | 2016 | 1.004837 | 0.705484 |
| Cabo Verde | 2017 | 0.957232 | 0.681284 |
| Cabo Verde | 2018 | 0.696343 | 0.470762 |
| Cabo Verde | 2019 | 0.705846 | 0.473874 |
| Cambodia   | 1990 | 1.272435 | 0.929989 |
| Cambodia   | 1991 | 1.277283 | 0.931682 |
| Cambodia   | 1992 | 1.287046 | 0.936978 |
| Cambodia   | 1993 | 1.299802 | 0.944499 |
| Cambodia   | 1994 | 1.311296 | 0.951699 |
| Cambodia   | 1995 | 1.305299 | 0.947258 |
| Cambodia   | 1996 | 1.305278 | 0.945959 |
| Cambodia   | 1997 | 1.294164 | 0.937495 |
| Cambodia   | 1998 | 1.282978 | 0.929409 |
| Cambodia   | 1999 | 1.272036 | 0.922534 |
| Cambodia   | 2000 | 1.259729 | 0.913971 |
| Cambodia   | 2001 | 1.246865 | 0.905562 |
| Cambodia   | 2002 | 1.239166 | 0.900746 |
| Cambodia   | 2003 | 1.227679 | 0.89253  |
| Cambodia   | 2004 | 1.212898 | 0.88247  |
| Cambodia   | 2005 | 1.193716 | 0.869231 |

|          |      |          |          |
|----------|------|----------|----------|
| Cambodia | 2006 | 1.18145  | 0.860138 |
| Cambodia | 2007 | 1.164389 | 0.848923 |
| Cambodia | 2008 | 1.148449 | 0.838274 |
| Cambodia | 2009 | 1.137969 | 0.830565 |
| Cambodia | 2010 | 1.134267 | 0.827896 |
| Cambodia | 2011 | 1.13422  | 0.827352 |
| Cambodia | 2012 | 1.135837 | 0.828119 |
| Cambodia | 2013 | 1.140934 | 0.831604 |
| Cambodia | 2014 | 1.14328  | 0.833467 |
| Cambodia | 2015 | 1.144017 | 0.833629 |
| Cambodia | 2016 | 1.146845 | 0.835286 |
| Cambodia | 2017 | 1.150349 | 0.836871 |
| Cambodia | 2018 | 1.152662 | 0.837604 |
| Cambodia | 2019 | 1.155105 | 0.838245 |
| Cameroon | 1990 | 1.147025 | 1.039542 |
| Cameroon | 1991 | 1.13009  | 1.023941 |
| Cameroon | 1992 | 1.11613  | 1.010117 |
| Cameroon | 1993 | 1.09613  | 0.991193 |
| Cameroon | 1994 | 1.085801 | 0.980193 |
| Cameroon | 1995 | 1.066587 | 0.962355 |
| Cameroon | 1996 | 1.04273  | 0.941254 |
| Cameroon | 1997 | 1.038881 | 0.934436 |
| Cameroon | 1998 | 1.030364 | 0.926553 |
| Cameroon | 1999 | 1.010618 | 0.908515 |
| Cameroon | 2000 | 0.99371  | 0.892449 |

|          |      |          |          |
|----------|------|----------|----------|
| Cameroon | 2001 | 0.973748 | 0.875349 |
| Cameroon | 2002 | 0.961464 | 0.860027 |
| Cameroon | 2003 | 0.950572 | 0.851844 |
| Cameroon | 2004 | 0.939277 | 0.843458 |
| Cameroon | 2005 | 0.925508 | 0.832964 |
| Cameroon | 2006 | 0.916299 | 0.824142 |
| Cameroon | 2007 | 0.904462 | 0.813191 |
| Cameroon | 2008 | 0.886022 | 0.796672 |
| Cameroon | 2009 | 0.876197 | 0.787422 |
| Cameroon | 2010 | 0.879262 | 0.788679 |
| Cameroon | 2011 | 0.880561 | 0.789209 |
| Cameroon | 2012 | 0.878504 | 0.786955 |
| Cameroon | 2013 | 0.876201 | 0.784414 |
| Cameroon | 2014 | 0.88642  | 0.793444 |
| Cameroon | 2015 | 0.894119 | 0.799428 |
| Cameroon | 2016 | 0.901086 | 0.806824 |
| Cameroon | 2017 | 0.904634 | 0.810746 |
| Cameroon | 2018 | 0.904815 | 0.812334 |
| Cameroon | 2019 | 0.906643 | 0.815062 |
| Canada   | 1990 | 1.071669 | 0.656583 |
| Canada   | 1991 | 1.068419 | 0.651509 |
| Canada   | 1992 | 1.072055 | 0.651547 |
| Canada   | 1993 | 1.062733 | 0.64336  |
| Canada   | 1994 | 1.071188 | 0.646973 |
| Canada   | 1995 | 1.056516 | 0.635922 |

|                          |      |          |          |
|--------------------------|------|----------|----------|
| Canada                   | 1996 | 1.06505  | 0.637783 |
| Canada                   | 1997 | 1.053599 | 0.628887 |
| Canada                   | 1998 | 1.053543 | 0.626099 |
| Canada                   | 1999 | 1.048713 | 0.618933 |
| Canada                   | 2000 | 1.075001 | 0.633436 |
| Canada                   | 2001 | 1.081442 | 0.635703 |
| Canada                   | 2002 | 1.090276 | 0.639234 |
| Canada                   | 2003 | 1.086281 | 0.636843 |
| Canada                   | 2004 | 1.090858 | 0.638593 |
| Canada                   | 2005 | 1.111257 | 0.652645 |
| Canada                   | 2006 | 1.138485 | 0.671429 |
| Canada                   | 2007 | 1.147179 | 0.680731 |
| Canada                   | 2008 | 1.155455 | 0.690482 |
| Canada                   | 2009 | 1.15475  | 0.694508 |
| Canada                   | 2010 | 1.166421 | 0.707449 |
| Canada                   | 2011 | 1.162524 | 0.712348 |
| Canada                   | 2012 | 1.14527  | 0.710073 |
| Canada                   | 2013 | 1.132927 | 0.710844 |
| Canada                   | 2014 | 1.127098 | 0.715051 |
| Canada                   | 2015 | 1.11813  | 0.716868 |
| Canada                   | 2016 | 1.106954 | 0.71676  |
| Canada                   | 2017 | 1.094248 | 0.715128 |
| Canada                   | 2018 | 1.074678 | 0.709354 |
| Canada                   | 2019 | 1.062453 | 0.707807 |
| Central African Republic | 1990 | 0.605335 | 0.494503 |

|                          |      |          |          |
|--------------------------|------|----------|----------|
| Central African Republic | 1991 | 0.595076 | 0.488287 |
| Central African Republic | 1992 | 0.579631 | 0.476163 |
| Central African Republic | 1993 | 0.593358 | 0.485861 |
| Central African Republic | 1994 | 0.597356 | 0.488188 |
| Central African Republic | 1995 | 0.60126  | 0.490392 |
| Central African Republic | 1996 | 0.606962 | 0.494629 |
| Central African Republic | 1997 | 0.606767 | 0.493809 |
| Central African Republic | 1998 | 0.60576  | 0.491861 |
| Central African Republic | 1999 | 0.601875 | 0.487075 |
| Central African Republic | 2000 | 0.599029 | 0.482639 |
| Central African Republic | 2001 | 0.598767 | 0.482322 |
| Central African Republic | 2002 | 0.601461 | 0.484166 |
| Central African Republic | 2003 | 0.60518  | 0.487199 |
| Central African Republic | 2004 | 0.605982 | 0.487695 |
| Central African Republic | 2005 | 0.60574  | 0.486763 |
| Central African Republic | 2006 | 0.606321 | 0.485265 |
| Central African Republic | 2007 | 0.605549 | 0.483734 |
| Central African Republic | 2008 | 0.602208 | 0.479866 |
| Central African Republic | 2009 | 0.602173 | 0.479239 |
| Central African Republic | 2010 | 0.600321 | 0.478502 |
| Central African Republic | 2011 | 0.601359 | 0.479995 |
| Central African Republic | 2012 | 0.604953 | 0.483166 |
| Central African Republic | 2013 | 0.609224 | 0.485905 |
| Central African Republic | 2014 | 0.609242 | 0.485843 |
| Central African Republic | 2015 | 0.606339 | 0.484164 |



|                          |      |          |          |
|--------------------------|------|----------|----------|
| Central African Republic | 2016 | 0.601069 | 0.48213  |
| Central African Republic | 2017 | 0.596947 | 0.480092 |
| Central African Republic | 2018 | 0.594318 | 0.478991 |
| Central African Republic | 2019 | 0.592694 | 0.479463 |
| Chad                     | 1990 | 0.834872 | 0.761775 |
| Chad                     | 1991 | 0.821838 | 0.752272 |
| Chad                     | 1992 | 0.80896  | 0.744471 |
| Chad                     | 1993 | 0.792107 | 0.732762 |
| Chad                     | 1994 | 0.769123 | 0.714465 |
| Chad                     | 1995 | 0.753542 | 0.702173 |
| Chad                     | 1996 | 0.731651 | 0.68299  |
| Chad                     | 1997 | 0.713377 | 0.666729 |
| Chad                     | 1998 | 0.700701 | 0.655117 |
| Chad                     | 1999 | 0.682246 | 0.638162 |
| Chad                     | 2000 | 0.669872 | 0.626096 |
| Chad                     | 2001 | 0.662084 | 0.61966  |
| Chad                     | 2002 | 0.65693  | 0.616713 |
| Chad                     | 2003 | 0.654422 | 0.618421 |
| Chad                     | 2004 | 0.644129 | 0.613396 |
| Chad                     | 2005 | 0.63571  | 0.610532 |
| Chad                     | 2006 | 0.628836 | 0.607959 |
| Chad                     | 2007 | 0.622864 | 0.607788 |
| Chad                     | 2008 | 0.614477 | 0.605515 |
| Chad                     | 2009 | 0.603446 | 0.603535 |
| Chad                     | 2010 | 0.597793 | 0.602175 |

|       |      |          |          |
|-------|------|----------|----------|
| Chad  | 2011 | 0.591857 | 0.601036 |
| Chad  | 2012 | 0.586086 | 0.600795 |
| Chad  | 2013 | 0.582037 | 0.600969 |
| Chad  | 2014 | 0.578729 | 0.604162 |
| Chad  | 2015 | 0.577133 | 0.606962 |
| Chad  | 2016 | 0.577592 | 0.611944 |
| Chad  | 2017 | 0.579311 | 0.618026 |
| Chad  | 2018 | 0.579088 | 0.621805 |
| Chad  | 2019 | 0.578632 | 0.626191 |
| Chile | 1990 | 0.975267 | 0.789928 |
| Chile | 1991 | 1.004222 | 0.810795 |
| Chile | 1992 | 1.03789  | 0.832208 |
| Chile | 1993 | 1.027902 | 0.817282 |
| Chile | 1994 | 1.024455 | 0.811473 |
| Chile | 1995 | 1.007339 | 0.788872 |
| Chile | 1996 | 0.980229 | 0.755604 |
| Chile | 1997 | 0.99706  | 0.765156 |
| Chile | 1998 | 1.032587 | 0.788071 |
| Chile | 1999 | 1.05249  | 0.799165 |
| Chile | 2000 | 1.06127  | 0.804204 |
| Chile | 2001 | 1.073648 | 0.813752 |
| Chile | 2002 | 1.076179 | 0.809961 |
| Chile | 2003 | 1.080699 | 0.808243 |
| Chile | 2004 | 1.09034  | 0.810053 |
| Chile | 2005 | 1.098112 | 0.812524 |

|       |      |          |          |
|-------|------|----------|----------|
| Chile | 2006 | 1.101727 | 0.813429 |
| Chile | 2007 | 1.099118 | 0.810954 |
| Chile | 2008 | 1.101981 | 0.816507 |
| Chile | 2009 | 1.087498 | 0.804882 |
| Chile | 2010 | 1.090558 | 0.803135 |
| Chile | 2011 | 1.106878 | 0.813052 |
| Chile | 2012 | 1.114865 | 0.818805 |
| Chile | 2013 | 1.110409 | 0.816162 |
| Chile | 2014 | 1.0971   | 0.804446 |
| Chile | 2015 | 1.100775 | 0.805611 |
| Chile | 2016 | 1.103035 | 0.806088 |
| Chile | 2017 | 1.114846 | 0.814555 |
| Chile | 2018 | 1.11631  | 0.815553 |
| Chile | 2019 | 1.114836 | 0.814624 |
| China | 1990 | 0.967823 | 0.814115 |
| China | 1991 | 0.958559 | 0.806344 |
| China | 1992 | 0.957942 | 0.80596  |
| China | 1993 | 0.964164 | 0.811179 |
| China | 1994 | 0.973764 | 0.813081 |
| China | 1995 | 0.959877 | 0.800819 |
| China | 1996 | 0.957836 | 0.79771  |
| China | 1997 | 0.962476 | 0.799933 |
| China | 1998 | 0.959408 | 0.790422 |
| China | 1999 | 0.962405 | 0.793427 |
| China | 2000 | 0.96278  | 0.800564 |

|          |      |          |          |
|----------|------|----------|----------|
| China    | 2001 | 0.950333 | 0.789064 |
| China    | 2002 | 0.932042 | 0.776288 |
| China    | 2003 | 0.921262 | 0.772159 |
| China    | 2004 | 0.906997 | 0.757937 |
| China    | 2005 | 0.88725  | 0.735528 |
| China    | 2006 | 0.897301 | 0.739151 |
| China    | 2007 | 0.892122 | 0.729779 |
| China    | 2008 | 0.88588  | 0.720897 |
| China    | 2009 | 0.880109 | 0.711189 |
| China    | 2010 | 0.877856 | 0.705003 |
| China    | 2011 | 0.877119 | 0.697836 |
| China    | 2012 | 0.854498 | 0.672527 |
| China    | 2013 | 0.849703 | 0.664253 |
| China    | 2014 | 0.845928 | 0.661064 |
| China    | 2015 | 0.836498 | 0.650847 |
| China    | 2016 | 0.840203 | 0.651806 |
| China    | 2017 | 0.858599 | 0.666526 |
| China    | 2018 | 0.878564 | 0.683378 |
| China    | 2019 | 0.887628 | 0.688388 |
| Colombia | 1990 | 0.92605  | 0.87332  |
| Colombia | 1991 | 0.88317  | 0.835151 |
| Colombia | 1992 | 0.881827 | 0.827676 |
| Colombia | 1993 | 0.897087 | 0.835138 |
| Colombia | 1994 | 0.897415 | 0.830507 |
| Colombia | 1995 | 0.883693 | 0.818259 |

|          |      |          |          |
|----------|------|----------|----------|
| Colombia | 1996 | 0.860237 | 0.790636 |
| Colombia | 1997 | 0.876126 | 0.798379 |
| Colombia | 1998 | 0.887859 | 0.799727 |
| Colombia | 1999 | 0.863474 | 0.772837 |
| Colombia | 2000 | 0.849005 | 0.755909 |
| Colombia | 2001 | 0.850541 | 0.749405 |
| Colombia | 2002 | 0.737513 | 0.644557 |
| Colombia | 2003 | 0.823671 | 0.713566 |
| Colombia | 2004 | 0.815959 | 0.70425  |
| Colombia | 2005 | 0.846694 | 0.725794 |
| Colombia | 2006 | 0.823752 | 0.702385 |
| Colombia | 2007 | 0.834971 | 0.708499 |
| Colombia | 2008 | 0.821626 | 0.69362  |
| Colombia | 2009 | 0.771829 | 0.648857 |
| Colombia | 2010 | 0.78163  | 0.652348 |
| Colombia | 2011 | 0.791119 | 0.65474  |
| Colombia | 2012 | 0.786915 | 0.647334 |
| Colombia | 2013 | 0.795163 | 0.650472 |
| Colombia | 2014 | 0.847073 | 0.690264 |
| Colombia | 2015 | 0.832346 | 0.676081 |
| Colombia | 2016 | 0.829521 | 0.671116 |
| Colombia | 2017 | 0.828961 | 0.667807 |
| Colombia | 2018 | 0.843668 | 0.676432 |
| Colombia | 2019 | 0.843713 | 0.675001 |
| Comoros  | 1990 | 0.733786 | 0.662082 |

|         |      |          |          |
|---------|------|----------|----------|
| Comoros | 1991 | 0.7402   | 0.663758 |
| Comoros | 1992 | 0.745905 | 0.664646 |
| Comoros | 1993 | 0.757544 | 0.670189 |
| Comoros | 1994 | 0.766249 | 0.672645 |
| Comoros | 1995 | 0.775972 | 0.676143 |
| Comoros | 1996 | 0.789989 | 0.682161 |
| Comoros | 1997 | 0.802756 | 0.68778  |
| Comoros | 1998 | 0.828547 | 0.704046 |
| Comoros | 1999 | 0.860904 | 0.725442 |
| Comoros | 2000 | 0.88092  | 0.738351 |
| Comoros | 2001 | 0.907113 | 0.756097 |
| Comoros | 2002 | 0.917167 | 0.761638 |
| Comoros | 2003 | 0.939988 | 0.777236 |
| Comoros | 2004 | 0.947701 | 0.781221 |
| Comoros | 2005 | 0.953186 | 0.787593 |
| Comoros | 2006 | 0.96207  | 0.788326 |
| Comoros | 2007 | 0.950667 | 0.783126 |
| Comoros | 2008 | 0.954273 | 0.785029 |
| Comoros | 2009 | 0.965166 | 0.788867 |
| Comoros | 2010 | 0.983476 | 0.796443 |
| Comoros | 2011 | 0.986429 | 0.798943 |
| Comoros | 2012 | 0.993435 | 0.803484 |
| Comoros | 2013 | 0.994148 | 0.805074 |
| Comoros | 2014 | 0.99033  | 0.809445 |
| Comoros | 2015 | 0.995551 | 0.813129 |

|         |      |          |          |
|---------|------|----------|----------|
| Comoros | 2016 | 1.000726 | 0.815787 |
| Comoros | 2017 | 1.006585 | 0.819901 |
| Comoros | 2018 | 1.010868 | 0.821308 |
| Comoros | 2019 | 1.012969 | 0.822834 |
| Congo   | 1990 | 0.751571 | 0.620385 |
| Congo   | 1991 | 0.757008 | 0.620743 |
| Congo   | 1992 | 0.751454 | 0.61207  |
| Congo   | 1993 | 0.767738 | 0.621074 |
| Congo   | 1994 | 0.793581 | 0.640092 |
| Congo   | 1995 | 0.807649 | 0.649302 |
| Congo   | 1996 | 0.843536 | 0.675503 |
| Congo   | 1997 | 0.849181 | 0.678751 |
| Congo   | 1998 | 0.861181 | 0.681345 |
| Congo   | 1999 | 0.873966 | 0.688289 |
| Congo   | 2000 | 0.887117 | 0.693063 |
| Congo   | 2001 | 0.894852 | 0.695199 |
| Congo   | 2002 | 0.91501  | 0.707194 |
| Congo   | 2003 | 0.938097 | 0.727745 |
| Congo   | 2004 | 0.965721 | 0.749928 |
| Congo   | 2005 | 0.999334 | 0.777948 |
| Congo   | 2006 | 1.01017  | 0.790931 |
| Congo   | 2007 | 1.01219  | 0.799437 |
| Congo   | 2008 | 1.011191 | 0.805224 |
| Congo   | 2009 | 1.001536 | 0.805305 |
| Congo   | 2010 | 1.005744 | 0.814986 |

|              |      |          |          |
|--------------|------|----------|----------|
| Congo        | 2011 | 0.995978 | 0.812365 |
| Congo        | 2012 | 0.976587 | 0.809515 |
| Congo        | 2013 | 0.96994  | 0.812844 |
| Congo        | 2014 | 0.962707 | 0.814701 |
| Congo        | 2015 | 0.950028 | 0.810594 |
| Congo        | 2016 | 0.936194 | 0.807464 |
| Congo        | 2017 | 0.929756 | 0.808413 |
| Congo        | 2018 | 0.918173 | 0.804938 |
| Congo        | 2019 | 0.907093 | 0.801955 |
| Cook Islands | 1990 | 0.731273 | 0.737078 |
| Cook Islands | 1991 | 0.714071 | 0.722799 |
| Cook Islands | 1992 | 0.703288 | 0.713012 |
| Cook Islands | 1993 | 0.694466 | 0.703081 |
| Cook Islands | 1994 | 0.691835 | 0.697671 |
| Cook Islands | 1995 | 0.690798 | 0.693392 |
| Cook Islands | 1996 | 0.692286 | 0.692624 |
| Cook Islands | 1997 | 0.691053 | 0.690664 |
| Cook Islands | 1998 | 0.687318 | 0.687769 |
| Cook Islands | 1999 | 0.678993 | 0.681139 |
| Cook Islands | 2000 | 0.670422 | 0.674048 |
| Cook Islands | 2001 | 0.676639 | 0.680259 |
| Cook Islands | 2002 | 0.677434 | 0.678221 |
| Cook Islands | 2003 | 0.672888 | 0.667111 |
| Cook Islands | 2004 | 0.672924 | 0.657395 |
| Cook Islands | 2005 | 0.660459 | 0.636278 |



|              |      |          |          |
|--------------|------|----------|----------|
| Cook Islands | 2006 | 0.662874 | 0.630598 |
| Cook Islands | 2007 | 0.655072 | 0.618395 |
| Cook Islands | 2008 | 0.655387 | 0.615491 |
| Cook Islands | 2009 | 0.660637 | 0.619082 |
| Cook Islands | 2010 | 0.662691 | 0.621673 |
| Cook Islands | 2011 | 0.64694  | 0.607209 |
| Cook Islands | 2012 | 0.643794 | 0.603641 |
| Cook Islands | 2013 | 0.648095 | 0.605316 |
| Cook Islands | 2014 | 0.648776 | 0.602425 |
| Cook Islands | 2015 | 0.646748 | 0.597015 |
| Cook Islands | 2016 | 0.64459  | 0.590916 |
| Cook Islands | 2017 | 0.657328 | 0.598123 |
| Cook Islands | 2018 | 0.665537 | 0.601679 |
| Cook Islands | 2019 | 0.673095 | 0.605095 |
| Costa Rica   | 1990 | 0.842686 | 0.780245 |
| Costa Rica   | 1991 | 0.846408 | 0.779555 |
| Costa Rica   | 1992 | 0.801387 | 0.735808 |
| Costa Rica   | 1993 | 0.822401 | 0.751924 |
| Costa Rica   | 1994 | 0.818493 | 0.744542 |
| Costa Rica   | 1995 | 0.809652 | 0.735454 |
| Costa Rica   | 1996 | 0.823017 | 0.742523 |
| Costa Rica   | 1997 | 0.81881  | 0.739022 |
| Costa Rica   | 1998 | 0.833152 | 0.75157  |
| Costa Rica   | 1999 | 0.772513 | 0.695838 |
| Costa Rica   | 2000 | 0.772973 | 0.691908 |

|            |      |          |          |
|------------|------|----------|----------|
| Costa Rica | 2001 | 0.792404 | 0.706965 |
| Costa Rica | 2002 | 0.785335 | 0.698226 |
| Costa Rica | 2003 | 0.789385 | 0.699126 |
| Costa Rica | 2004 | 0.775158 | 0.685789 |
| Costa Rica | 2005 | 0.823794 | 0.726354 |
| Costa Rica | 2006 | 0.794886 | 0.69863  |
| Costa Rica | 2007 | 0.804319 | 0.704393 |
| Costa Rica | 2008 | 0.802687 | 0.700785 |
| Costa Rica | 2009 | 0.824271 | 0.715522 |
| Costa Rica | 2010 | 0.752826 | 0.65028  |
| Costa Rica | 2011 | 0.779381 | 0.666415 |
| Costa Rica | 2012 | 0.797407 | 0.675406 |
| Costa Rica | 2013 | 0.796876 | 0.669869 |
| Costa Rica | 2014 | 0.79033  | 0.658754 |
| Costa Rica | 2015 | 0.788694 | 0.653029 |
| Costa Rica | 2016 | 0.795657 | 0.658021 |
| Costa Rica | 2017 | 0.805902 | 0.664662 |
| Costa Rica | 2018 | 0.785138 | 0.644119 |
| Costa Rica | 2019 | 0.794065 | 0.647561 |
| Croatia    | 1990 | 1.120185 | 0.65127  |
| Croatia    | 1991 | 1.125968 | 0.653247 |
| Croatia    | 1992 | 1.121772 | 0.655144 |
| Croatia    | 1993 | 1.111291 | 0.645602 |
| Croatia    | 1994 | 1.121473 | 0.65099  |
| Croatia    | 1995 | 1.139708 | 0.659749 |

|         |      |          |          |
|---------|------|----------|----------|
| Croatia | 1996 | 1.161451 | 0.665951 |
| Croatia | 1997 | 1.152629 | 0.651192 |
| Croatia | 1998 | 1.166428 | 0.64639  |
| Croatia | 1999 | 1.196099 | 0.654948 |
| Croatia | 2000 | 1.216367 | 0.660369 |
| Croatia | 2001 | 1.220003 | 0.655333 |
| Croatia | 2002 | 1.248965 | 0.670539 |
| Croatia | 2003 | 1.232678 | 0.662375 |
| Croatia | 2004 | 1.28712  | 0.691856 |
| Croatia | 2005 | 1.241395 | 0.66823  |
| Croatia | 2006 | 1.256257 | 0.676099 |
| Croatia | 2007 | 1.282833 | 0.69208  |
| Croatia | 2008 | 1.256338 | 0.68161  |
| Croatia | 2009 | 1.257667 | 0.683845 |
| Croatia | 2010 | 1.318366 | 0.725261 |
| Croatia | 2011 | 1.290008 | 0.714134 |
| Croatia | 2012 | 1.250825 | 0.693977 |
| Croatia | 2013 | 1.318069 | 0.727072 |
| Croatia | 2014 | 1.304176 | 0.721959 |
| Croatia | 2015 | 1.322415 | 0.740471 |
| Croatia | 2016 | 1.287002 | 0.722383 |
| Croatia | 2017 | 1.265466 | 0.716749 |
| Croatia | 2018 | 1.256311 | 0.71655  |
| Croatia | 2019 | 1.242454 | 0.714384 |
| Cuba    | 1990 | 0.727847 | 0.702803 |

|      |      |          |          |
|------|------|----------|----------|
| Cuba | 1991 | 0.724469 | 0.694605 |
| Cuba | 1992 | 0.729795 | 0.694633 |
| Cuba | 1993 | 0.720995 | 0.682637 |
| Cuba | 1994 | 0.70017  | 0.659501 |
| Cuba | 1995 | 0.738602 | 0.691371 |
| Cuba | 1996 | 0.766014 | 0.714588 |
| Cuba | 1997 | 0.765753 | 0.712793 |
| Cuba | 1998 | 0.800248 | 0.743681 |
| Cuba | 1999 | 0.812952 | 0.753939 |
| Cuba | 2000 | 0.881295 | 0.814171 |
| Cuba | 2001 | 0.959164 | 0.883325 |
| Cuba | 2002 | 0.988012 | 0.90707  |
| Cuba | 2003 | 1.02399  | 0.936121 |
| Cuba | 2004 | 1.061575 | 0.965081 |
| Cuba | 2005 | 1.074199 | 0.973171 |
| Cuba | 2006 | 1.080161 | 0.975409 |
| Cuba | 2007 | 1.094049 | 0.985931 |
| Cuba | 2008 | 1.115955 | 1.001873 |
| Cuba | 2009 | 1.088237 | 0.972591 |
| Cuba | 2010 | 1.080138 | 0.961158 |
| Cuba | 2011 | 1.104658 | 0.980563 |
| Cuba | 2012 | 1.059809 | 0.939556 |
| Cuba | 2013 | 1.057449 | 0.934553 |
| Cuba | 2014 | 1.045602 | 0.920903 |
| Cuba | 2015 | 1.024565 | 0.900839 |

|        |      |          |          |
|--------|------|----------|----------|
| Cuba   | 2016 | 0.999353 | 0.875106 |
| Cuba   | 2017 | 0.976223 | 0.851947 |
| Cuba   | 2018 | 0.979438 | 0.850798 |
| Cuba   | 2019 | 0.984318 | 0.851479 |
| Cyprus | 1990 | 0.973492 | 0.995284 |
| Cyprus | 1991 | 0.870799 | 0.852337 |
| Cyprus | 1992 | 0.836617 | 0.776383 |
| Cyprus | 1993 | 0.865602 | 0.768364 |
| Cyprus | 1994 | 0.894084 | 0.769336 |
| Cyprus | 1995 | 0.884558 | 0.755664 |
| Cyprus | 1996 | 0.850063 | 0.727604 |
| Cyprus | 1997 | 0.836166 | 0.718292 |
| Cyprus | 1998 | 0.862069 | 0.738631 |
| Cyprus | 1999 | 0.890677 | 0.7614   |
| Cyprus | 2000 | 0.839486 | 0.709185 |
| Cyprus | 2001 | 0.828953 | 0.682359 |
| Cyprus | 2002 | 0.831988 | 0.672456 |
| Cyprus | 2003 | 0.888021 | 0.684125 |
| Cyprus | 2004 | 0.889668 | 0.677149 |
| Cyprus | 2005 | 0.883011 | 0.659401 |
| Cyprus | 2006 | 0.876697 | 0.632202 |
| Cyprus | 2007 | 0.867611 | 0.61137  |
| Cyprus | 2008 | 0.874585 | 0.601709 |
| Cyprus | 2009 | 0.842293 | 0.542734 |
| Cyprus | 2010 | 0.842268 | 0.527126 |

|         |      |          |          |
|---------|------|----------|----------|
| Cyprus  | 2011 | 0.902202 | 0.551805 |
| Cyprus  | 2012 | 0.932618 | 0.566257 |
| Cyprus  | 2013 | 0.954078 | 0.588914 |
| Cyprus  | 2014 | 0.981005 | 0.618201 |
| Cyprus  | 2015 | 0.972019 | 0.633882 |
| Cyprus  | 2016 | 0.994398 | 0.701614 |
| Cyprus  | 2017 | 1.049295 | 0.817407 |
| Cyprus  | 2018 | 1.005187 | 0.80001  |
| Cyprus  | 2019 | 0.963696 | 0.782896 |
| Czechia | 1990 | 1.016176 | 0.624468 |
| Czechia | 1991 | 1.092255 | 0.665403 |
| Czechia | 1992 | 1.114824 | 0.676432 |
| Czechia | 1993 | 1.165005 | 0.705793 |
| Czechia | 1994 | 1.161923 | 0.705491 |
| Czechia | 1995 | 1.221828 | 0.746068 |
| Czechia | 1996 | 1.210004 | 0.738504 |
| Czechia | 1997 | 1.2386   | 0.75613  |
| Czechia | 1998 | 1.243416 | 0.755395 |
| Czechia | 1999 | 1.216241 | 0.737046 |
| Czechia | 2000 | 1.251442 | 0.756081 |
| Czechia | 2001 | 1.23813  | 0.748034 |
| Czechia | 2002 | 1.232174 | 0.737573 |
| Czechia | 2003 | 1.2408   | 0.740963 |
| Czechia | 2004 | 1.219882 | 0.723872 |
| Czechia | 2005 | 1.260818 | 0.743677 |

|                 |      |          |          |
|-----------------|------|----------|----------|
| Czechia         | 2006 | 1.263043 | 0.740681 |
| Czechia         | 2007 | 1.254411 | 0.738889 |
| Czechia         | 2008 | 1.2398   | 0.735183 |
| Czechia         | 2009 | 1.218698 | 0.726824 |
| Czechia         | 2010 | 1.206849 | 0.719868 |
| Czechia         | 2011 | 1.208496 | 0.722033 |
| Czechia         | 2012 | 1.210538 | 0.724006 |
| Czechia         | 2013 | 1.220183 | 0.728389 |
| Czechia         | 2014 | 1.220982 | 0.727287 |
| Czechia         | 2015 | 1.22085  | 0.726128 |
| Czechia         | 2016 | 1.216345 | 0.725895 |
| Czechia         | 2017 | 1.174381 | 0.703135 |
| Czechia         | 2018 | 1.163977 | 0.704178 |
| Czechia         | 2019 | 1.15844  | 0.708733 |
| C Ț te d'Ivoire | 1990 | 0.608796 | 0.660555 |
| C Ț te d'Ivoire | 1991 | 0.595623 | 0.644126 |
| C Ț te d'Ivoire | 1992 | 0.578152 | 0.627977 |
| C Ț te d'Ivoire | 1993 | 0.56919  | 0.618807 |
| C Ț te d'Ivoire | 1994 | 0.557509 | 0.606066 |
| C Ț te d'Ivoire | 1995 | 0.549824 | 0.596539 |
| C Ț te d'Ivoire | 1996 | 0.548132 | 0.592989 |
| C Ț te d'Ivoire | 1997 | 0.552384 | 0.594317 |
| C Ț te d'Ivoire | 1998 | 0.559997 | 0.597753 |
| C Ț te d'Ivoire | 1999 | 0.564649 | 0.599111 |
| C Ț te d'Ivoire | 2000 | 0.571707 | 0.601928 |

|                                       |      |          |          |
|---------------------------------------|------|----------|----------|
| C Ț te d'Ivoire                       | 2001 | 0.585033 | 0.608489 |
| C Ț te d'Ivoire                       | 2002 | 0.595451 | 0.615232 |
| C Ț te d'Ivoire                       | 2003 | 0.602649 | 0.618669 |
| C Ț te d'Ivoire                       | 2004 | 0.604192 | 0.619534 |
| C Ț te d'Ivoire                       | 2005 | 0.613897 | 0.625708 |
| C Ț te d'Ivoire                       | 2006 | 0.622914 | 0.631968 |
| C Ț te d'Ivoire                       | 2007 | 0.625933 | 0.632453 |
| C Ț te d'Ivoire                       | 2008 | 0.630376 | 0.635391 |
| C Ț te d'Ivoire                       | 2009 | 0.632111 | 0.63704  |
| C Ț te d'Ivoire                       | 2010 | 0.629477 | 0.635272 |
| C Ț te d'Ivoire                       | 2011 | 0.627319 | 0.633461 |
| C Ț te d'Ivoire                       | 2012 | 0.625624 | 0.632268 |
| C Ț te d'Ivoire                       | 2013 | 0.623281 | 0.631079 |
| C Ț te d'Ivoire                       | 2014 | 0.62667  | 0.635978 |
| C Ț te d'Ivoire                       | 2015 | 0.631361 | 0.641248 |
| C Ț te d'Ivoire                       | 2016 | 0.635046 | 0.64627  |
| C Ț te d'Ivoire                       | 2017 | 0.637611 | 0.650224 |
| C Ț te d'Ivoire                       | 2018 | 0.641324 | 0.658071 |
| C Ț te d'Ivoire                       | 2019 | 0.643183 | 0.663257 |
| Democratic People's Republic of Korea | 1990 | 1.519679 | 0.93015  |
| Democratic People's Republic of Korea | 1991 | 1.517594 | 0.928075 |
| Democratic People's Republic of Korea | 1992 | 1.515332 | 0.925618 |
| Democratic People's Republic of Korea | 1993 | 1.511403 | 0.922131 |
| Democratic People's Republic of Korea | 1994 | 1.508383 | 0.918629 |
| Democratic People's Republic of Korea | 1995 | 1.50472  | 0.916326 |



|                                       |      |          |          |
|---------------------------------------|------|----------|----------|
| Democratic People's Republic of Korea | 1996 | 1.499132 | 0.914125 |
| Democratic People's Republic of Korea | 1997 | 1.48746  | 0.907333 |
| Democratic People's Republic of Korea | 1998 | 1.47484  | 0.898221 |
| Democratic People's Republic of Korea | 1999 | 1.465112 | 0.889807 |
| Democratic People's Republic of Korea | 2000 | 1.457588 | 0.883    |
| Democratic People's Republic of Korea | 2001 | 1.449234 | 0.87407  |
| Democratic People's Republic of Korea | 2002 | 1.439481 | 0.863734 |
| Democratic People's Republic of Korea | 2003 | 1.428879 | 0.857005 |
| Democratic People's Republic of Korea | 2004 | 1.420628 | 0.85164  |
| Democratic People's Republic of Korea | 2005 | 1.413032 | 0.846354 |
| Democratic People's Republic of Korea | 2006 | 1.408239 | 0.843679 |
| Democratic People's Republic of Korea | 2007 | 1.404697 | 0.842011 |
| Democratic People's Republic of Korea | 2008 | 1.404365 | 0.842973 |
| Democratic People's Republic of Korea | 2009 | 1.405944 | 0.8431   |
| Democratic People's Republic of Korea | 2010 | 1.404803 | 0.841923 |
| Democratic People's Republic of Korea | 2011 | 1.398525 | 0.838881 |
| Democratic People's Republic of Korea | 2012 | 1.386802 | 0.833673 |
| Democratic People's Republic of Korea | 2013 | 1.371735 | 0.82762  |
| Democratic People's Republic of Korea | 2014 | 1.353179 | 0.81921  |
| Democratic People's Republic of Korea | 2015 | 1.335352 | 0.811898 |
| Democratic People's Republic of Korea | 2016 | 1.318845 | 0.806027 |
| Democratic People's Republic of Korea | 2017 | 1.307835 | 0.803468 |
| Democratic People's Republic of Korea | 2018 | 1.299564 | 0.802576 |
| Democratic People's Republic of Korea | 2019 | 1.295109 | 0.802939 |
| Democratic Republic of the Congo      | 1990 | 0.725667 | 0.623441 |

|                                  |      |          |          |
|----------------------------------|------|----------|----------|
| Democratic Republic of the Congo | 1991 | 0.740756 | 0.629281 |
| Democratic Republic of the Congo | 1992 | 0.75213  | 0.632608 |
| Democratic Republic of the Congo | 1993 | 0.766523 | 0.637728 |
| Democratic Republic of the Congo | 1994 | 0.77596  | 0.638698 |
| Democratic Republic of the Congo | 1995 | 0.783725 | 0.63836  |
| Democratic Republic of the Congo | 1996 | 0.809876 | 0.651945 |
| Democratic Republic of the Congo | 1997 | 0.808153 | 0.642786 |
| Democratic Republic of the Congo | 1998 | 0.825377 | 0.648066 |
| Democratic Republic of the Congo | 1999 | 0.839514 | 0.651081 |
| Democratic Republic of the Congo | 2000 | 0.857808 | 0.657211 |
| Democratic Republic of the Congo | 2001 | 0.880893 | 0.668343 |
| Democratic Republic of the Congo | 2002 | 0.900827 | 0.677205 |
| Democratic Republic of the Congo | 2003 | 0.915041 | 0.684614 |
| Democratic Republic of the Congo | 2004 | 0.928388 | 0.689952 |
| Democratic Republic of the Congo | 2005 | 0.935923 | 0.692857 |
| Democratic Republic of the Congo | 2006 | 0.938317 | 0.693584 |
| Democratic Republic of the Congo | 2007 | 0.934732 | 0.69219  |
| Democratic Republic of the Congo | 2008 | 0.927033 | 0.689089 |
| Democratic Republic of the Congo | 2009 | 0.92225  | 0.687671 |
| Democratic Republic of the Congo | 2010 | 0.913491 | 0.68321  |
| Democratic Republic of the Congo | 2011 | 0.903043 | 0.679241 |
| Democratic Republic of the Congo | 2012 | 0.896883 | 0.678318 |
| Democratic Republic of the Congo | 2013 | 0.889759 | 0.677695 |
| Democratic Republic of the Congo | 2014 | 0.884106 | 0.678253 |
| Democratic Republic of the Congo | 2015 | 0.885333 | 0.681047 |

|                                  |      |          |          |
|----------------------------------|------|----------|----------|
| Democratic Republic of the Congo | 2016 | 0.883509 | 0.685571 |
| Democratic Republic of the Congo | 2017 | 0.883648 | 0.690975 |
| Democratic Republic of the Congo | 2018 | 0.878558 | 0.693063 |
| Democratic Republic of the Congo | 2019 | 0.876196 | 0.69748  |
| Denmark                          | 1990 | 0.914828 | 0.580452 |
| Denmark                          | 1991 | 0.912012 | 0.572928 |
| Denmark                          | 1992 | 0.890685 | 0.554798 |
| Denmark                          | 1993 | 0.87468  | 0.544928 |
| Denmark                          | 1994 | 0.831742 | 0.522527 |
| Denmark                          | 1995 | 0.824691 | 0.520423 |
| Denmark                          | 1996 | 0.81649  | 0.514111 |
| Denmark                          | 1997 | 0.821561 | 0.517473 |
| Denmark                          | 1998 | 0.800373 | 0.502251 |
| Denmark                          | 1999 | 0.798478 | 0.504149 |
| Denmark                          | 2000 | 0.814684 | 0.504074 |
| Denmark                          | 2001 | 0.824117 | 0.502832 |
| Denmark                          | 2002 | 0.839073 | 0.506498 |
| Denmark                          | 2003 | 0.834985 | 0.501439 |
| Denmark                          | 2004 | 0.840014 | 0.504647 |
| Denmark                          | 2005 | 0.859294 | 0.51366  |
| Denmark                          | 2006 | 0.872854 | 0.519461 |
| Denmark                          | 2007 | 0.897032 | 0.531496 |
| Denmark                          | 2008 | 0.907035 | 0.535438 |
| Denmark                          | 2009 | 0.901804 | 0.534455 |
| Denmark                          | 2010 | 0.913237 | 0.543388 |

|          |      |          |          |
|----------|------|----------|----------|
| Denmark  | 2011 | 0.930847 | 0.55667  |
| Denmark  | 2012 | 0.925529 | 0.557666 |
| Denmark  | 2013 | 0.909819 | 0.55261  |
| Denmark  | 2014 | 0.911329 | 0.558367 |
| Denmark  | 2015 | 0.920682 | 0.572028 |
| Denmark  | 2016 | 0.891396 | 0.563705 |
| Denmark  | 2017 | 0.87517  | 0.562369 |
| Denmark  | 2018 | 0.856567 | 0.559299 |
| Denmark  | 2019 | 0.83897  | 0.555753 |
| Djibouti | 1990 | 0.63711  | 0.62949  |
| Djibouti | 1991 | 0.640369 | 0.623249 |
| Djibouti | 1992 | 0.633152 | 0.617298 |
| Djibouti | 1993 | 0.612619 | 0.606712 |
| Djibouti | 1994 | 0.606436 | 0.600977 |
| Djibouti | 1995 | 0.597126 | 0.597611 |
| Djibouti | 1996 | 0.591292 | 0.597983 |
| Djibouti | 1997 | 0.591939 | 0.603648 |
| Djibouti | 1998 | 0.589677 | 0.60793  |
| Djibouti | 1999 | 0.591275 | 0.614159 |
| Djibouti | 2000 | 0.589404 | 0.615726 |
| Djibouti | 2001 | 0.588645 | 0.619655 |
| Djibouti | 2002 | 0.588821 | 0.624743 |
| Djibouti | 2003 | 0.59524  | 0.632076 |
| Djibouti | 2004 | 0.600295 | 0.640742 |
| Djibouti | 2005 | 0.604165 | 0.646974 |

|          |      |          |          |
|----------|------|----------|----------|
| Djibouti | 2006 | 0.607081 | 0.651123 |
| Djibouti | 2007 | 0.59813  | 0.646241 |
| Djibouti | 2008 | 0.592115 | 0.644566 |
| Djibouti | 2009 | 0.593195 | 0.649664 |
| Djibouti | 2010 | 0.596027 | 0.655453 |
| Djibouti | 2011 | 0.597782 | 0.661758 |
| Djibouti | 2012 | 0.601631 | 0.66921  |
| Djibouti | 2013 | 0.607341 | 0.678561 |
| Djibouti | 2014 | 0.609306 | 0.685456 |
| Djibouti | 2015 | 0.613572 | 0.691928 |
| Djibouti | 2016 | 0.616979 | 0.699061 |
| Djibouti | 2017 | 0.620938 | 0.707408 |
| Djibouti | 2018 | 0.622501 | 0.713307 |
| Djibouti | 2019 | 0.623897 | 0.718761 |
| Dominica | 1990 | 1.022575 | 0.68341  |
| Dominica | 1991 | 1.030748 | 0.681536 |
| Dominica | 1992 | 0.966633 | 0.635319 |
| Dominica | 1993 | 0.955614 | 0.621836 |
| Dominica | 1994 | 0.967154 | 0.623203 |
| Dominica | 1995 | 0.971693 | 0.621751 |
| Dominica | 1996 | 0.982772 | 0.625897 |
| Dominica | 1997 | 0.995791 | 0.633172 |
| Dominica | 1998 | 1.014203 | 0.645226 |
| Dominica | 1999 | 1.07042  | 0.681689 |
| Dominica | 2000 | 1.106362 | 0.706969 |

|                    |      |          |          |
|--------------------|------|----------|----------|
| Dominica           | 2001 | 1.133138 | 0.731554 |
| Dominica           | 2002 | 1.144745 | 0.752951 |
| Dominica           | 2003 | 1.130896 | 0.76167  |
| Dominica           | 2004 | 1.100279 | 0.756289 |
| Dominica           | 2005 | 1.098023 | 0.757618 |
| Dominica           | 2006 | 1.097205 | 0.766254 |
| Dominica           | 2007 | 1.086021 | 0.768361 |
| Dominica           | 2008 | 1.059714 | 0.765443 |
| Dominica           | 2009 | 1.039281 | 0.764358 |
| Dominica           | 2010 | 1.017251 | 0.762748 |
| Dominica           | 2011 | 1.00979  | 0.773488 |
| Dominica           | 2012 | 0.988291 | 0.776944 |
| Dominica           | 2013 | 0.972341 | 0.779038 |
| Dominica           | 2014 | 0.951066 | 0.776249 |
| Dominica           | 2015 | 0.929208 | 0.769479 |
| Dominica           | 2016 | 0.924913 | 0.775782 |
| Dominica           | 2017 | 0.916874 | 0.778058 |
| Dominica           | 2018 | 0.909062 | 0.779735 |
| Dominica           | 2019 | 0.902622 | 0.781262 |
| Dominican Republic | 1990 | 0.792257 | 0.775078 |
| Dominican Republic | 1991 | 0.813805 | 0.79193  |
| Dominican Republic | 1992 | 0.834425 | 0.808714 |
| Dominican Republic | 1993 | 0.867692 | 0.836164 |
| Dominican Republic | 1994 | 0.831727 | 0.799803 |
| Dominican Republic | 1995 | 0.788926 | 0.756014 |

|                    |      |          |          |
|--------------------|------|----------|----------|
| Dominican Republic | 1996 | 0.750525 | 0.710374 |
| Dominican Republic | 1997 | 0.727226 | 0.680711 |
| Dominican Republic | 1998 | 0.704717 | 0.653237 |
| Dominican Republic | 1999 | 0.655838 | 0.600255 |
| Dominican Republic | 2000 | 0.667709 | 0.608755 |
| Dominican Republic | 2001 | 0.683421 | 0.621056 |
| Dominican Republic | 2002 | 0.672707 | 0.608319 |
| Dominican Republic | 2003 | 0.688722 | 0.619241 |
| Dominican Republic | 2004 | 0.716078 | 0.641397 |
| Dominican Republic | 2005 | 0.748373 | 0.669059 |
| Dominican Republic | 2006 | 0.755305 | 0.675231 |
| Dominican Republic | 2007 | 0.762239 | 0.680346 |
| Dominican Republic | 2008 | 0.776457 | 0.691661 |
| Dominican Republic | 2009 | 0.795809 | 0.710386 |
| Dominican Republic | 2010 | 0.808009 | 0.727011 |
| Dominican Republic | 2011 | 0.795596 | 0.723439 |
| Dominican Republic | 2012 | 0.780869 | 0.71514  |
| Dominican Republic | 2013 | 0.77778  | 0.715245 |
| Dominican Republic | 2014 | 0.790124 | 0.729196 |
| Dominican Republic | 2015 | 0.802808 | 0.741573 |
| Dominican Republic | 2016 | 0.815963 | 0.755204 |
| Dominican Republic | 2017 | 0.835907 | 0.773302 |
| Dominican Republic | 2018 | 0.852982 | 0.787151 |
| Dominican Republic | 2019 | 0.867118 | 0.7988   |
| Ecuador            | 1990 | 1.004058 | 1.011805 |

|         |      |          |          |
|---------|------|----------|----------|
| Ecuador | 1991 | 0.968923 | 0.969688 |
| Ecuador | 1992 | 1.003831 | 0.998713 |
| Ecuador | 1993 | 0.991662 | 0.981519 |
| Ecuador | 1994 | 0.975175 | 0.96323  |
| Ecuador | 1995 | 0.969265 | 0.958788 |
| Ecuador | 1996 | 0.955254 | 0.945169 |
| Ecuador | 1997 | 0.963522 | 0.948701 |
| Ecuador | 1998 | 0.952234 | 0.929045 |
| Ecuador | 1999 | 0.923097 | 0.898357 |
| Ecuador | 2000 | 0.945688 | 0.918728 |
| Ecuador | 2001 | 0.850152 | 0.82902  |
| Ecuador | 2002 | 0.961827 | 0.929527 |
| Ecuador | 2003 | 1.002522 | 0.961998 |
| Ecuador | 2004 | 0.951695 | 0.910259 |
| Ecuador | 2005 | 0.933601 | 0.891627 |
| Ecuador | 2006 | 0.935124 | 0.891747 |
| Ecuador | 2007 | 0.923045 | 0.875347 |
| Ecuador | 2008 | 0.908829 | 0.848903 |
| Ecuador | 2009 | 0.909745 | 0.838831 |
| Ecuador | 2010 | 0.905887 | 0.830621 |
| Ecuador | 2011 | 0.872038 | 0.795452 |
| Ecuador | 2012 | 0.948539 | 0.857824 |
| Ecuador | 2013 | 0.954923 | 0.857567 |
| Ecuador | 2014 | 0.945461 | 0.846159 |
| Ecuador | 2015 | 0.933084 | 0.834753 |



|         |      |          |          |
|---------|------|----------|----------|
| Ecuador | 2016 | 0.940996 | 0.838891 |
| Ecuador | 2017 | 0.946693 | 0.839503 |
| Ecuador | 2018 | 0.958062 | 0.848115 |
| Ecuador | 2019 | 0.982864 | 0.871573 |
| Egypt   | 1990 | 1.352837 | 1.300901 |
| Egypt   | 1991 | 1.345168 | 1.317427 |
| Egypt   | 1992 | 1.356801 | 1.35033  |
| Egypt   | 1993 | 1.359543 | 1.369332 |
| Egypt   | 1994 | 1.336761 | 1.356111 |
| Egypt   | 1995 | 1.314426 | 1.347094 |
| Egypt   | 1996 | 1.356722 | 1.410277 |
| Egypt   | 1997 | 1.367379 | 1.441698 |
| Egypt   | 1998 | 1.367158 | 1.459711 |
| Egypt   | 1999 | 1.357297 | 1.482505 |
| Egypt   | 2000 | 1.355486 | 1.547564 |
| Egypt   | 2001 | 1.340398 | 1.572534 |
| Egypt   | 2002 | 1.300644 | 1.537725 |
| Egypt   | 2003 | 1.241502 | 1.444409 |
| Egypt   | 2004 | 1.231767 | 1.42514  |
| Egypt   | 2005 | 1.259757 | 1.48129  |
| Egypt   | 2006 | 1.273849 | 1.56127  |
| Egypt   | 2007 | 1.241724 | 1.559132 |
| Egypt   | 2008 | 1.2281   | 1.558302 |
| Egypt   | 2009 | 1.221783 | 1.566194 |
| Egypt   | 2010 | 1.223014 | 1.588974 |

|             |      |          |          |
|-------------|------|----------|----------|
| Egypt       | 2011 | 1.166152 | 1.543971 |
| Egypt       | 2012 | 1.181251 | 1.56277  |
| Egypt       | 2013 | 1.128811 | 1.5249   |
| Egypt       | 2014 | 1.142337 | 1.587852 |
| Egypt       | 2015 | 1.165619 | 1.642986 |
| Egypt       | 2016 | 1.160821 | 1.652987 |
| Egypt       | 2017 | 1.148174 | 1.63138  |
| Egypt       | 2018 | 1.137364 | 1.622527 |
| Egypt       | 2019 | 1.124721 | 1.598394 |
| El Salvador | 1990 | 0.73088  | 0.628185 |
| El Salvador | 1991 | 0.70667  | 0.605372 |
| El Salvador | 1992 | 0.706118 | 0.602843 |
| El Salvador | 1993 | 0.690439 | 0.588379 |
| El Salvador | 1994 | 0.691847 | 0.586128 |
| El Salvador | 1995 | 0.625846 | 0.525309 |
| El Salvador | 1996 | 0.678738 | 0.566622 |
| El Salvador | 1997 | 0.642916 | 0.534002 |
| El Salvador | 1998 | 0.567219 | 0.466982 |
| El Salvador | 1999 | 0.592851 | 0.484268 |
| El Salvador | 2000 | 0.547509 | 0.443736 |
| El Salvador | 2001 | 0.570958 | 0.459772 |
| El Salvador | 2002 | 0.57284  | 0.458034 |
| El Salvador | 2003 | 0.540174 | 0.428803 |
| El Salvador | 2004 | 0.519341 | 0.408988 |
| El Salvador | 2005 | 0.506918 | 0.396288 |

|                   |      |          |          |
|-------------------|------|----------|----------|
| El Salvador       | 2006 | 0.491691 | 0.381601 |
| El Salvador       | 2007 | 0.506517 | 0.390121 |
| El Salvador       | 2008 | 0.5161   | 0.394159 |
| El Salvador       | 2009 | 0.523686 | 0.396446 |
| El Salvador       | 2010 | 0.551921 | 0.415391 |
| El Salvador       | 2011 | 0.554047 | 0.414798 |
| El Salvador       | 2012 | 0.581725 | 0.432742 |
| El Salvador       | 2013 | 0.60464  | 0.447815 |
| El Salvador       | 2014 | 0.563794 | 0.416177 |
| El Salvador       | 2015 | 0.565509 | 0.415662 |
| El Salvador       | 2016 | 0.560112 | 0.409023 |
| El Salvador       | 2017 | 0.573525 | 0.415772 |
| El Salvador       | 2018 | 0.589898 | 0.425152 |
| El Salvador       | 2019 | 0.588189 | 0.420935 |
| Equatorial Guinea | 1990 | 0.633973 | 0.475046 |
| Equatorial Guinea | 1991 | 0.643732 | 0.476437 |
| Equatorial Guinea | 1992 | 0.648953 | 0.474689 |
| Equatorial Guinea | 1993 | 0.667183 | 0.482076 |
| Equatorial Guinea | 1994 | 0.685891 | 0.489868 |
| Equatorial Guinea | 1995 | 0.695666 | 0.493196 |
| Equatorial Guinea | 1996 | 0.719499 | 0.505742 |
| Equatorial Guinea | 1997 | 0.726417 | 0.506651 |
| Equatorial Guinea | 1998 | 0.743037 | 0.514358 |
| Equatorial Guinea | 1999 | 0.75764  | 0.522421 |
| Equatorial Guinea | 2000 | 0.771162 | 0.530608 |

|                   |      |          |          |
|-------------------|------|----------|----------|
| Equatorial Guinea | 2001 | 0.78625  | 0.541806 |
| Equatorial Guinea | 2002 | 0.813222 | 0.560839 |
| Equatorial Guinea | 2003 | 0.844645 | 0.586309 |
| Equatorial Guinea | 2004 | 0.864957 | 0.605754 |
| Equatorial Guinea | 2005 | 0.883082 | 0.624017 |
| Equatorial Guinea | 2006 | 0.89857  | 0.641249 |
| Equatorial Guinea | 2007 | 0.903298 | 0.651933 |
| Equatorial Guinea | 2008 | 0.921692 | 0.668859 |
| Equatorial Guinea | 2009 | 0.937131 | 0.689382 |
| Equatorial Guinea | 2010 | 0.954428 | 0.707902 |
| Equatorial Guinea | 2011 | 0.94896  | 0.713287 |
| Equatorial Guinea | 2012 | 0.934341 | 0.710454 |
| Equatorial Guinea | 2013 | 0.911668 | 0.701174 |
| Equatorial Guinea | 2014 | 0.904311 | 0.702942 |
| Equatorial Guinea | 2015 | 0.913769 | 0.712517 |
| Equatorial Guinea | 2016 | 0.908977 | 0.71704  |
| Equatorial Guinea | 2017 | 0.899726 | 0.715847 |
| Equatorial Guinea | 2018 | 0.895166 | 0.716091 |
| Equatorial Guinea | 2019 | 0.892762 | 0.716859 |
| Eritrea           | 1990 | 0.677516 | 0.486014 |
| Eritrea           | 1991 | 0.66837  | 0.481683 |
| Eritrea           | 1992 | 0.653672 | 0.476384 |
| Eritrea           | 1993 | 0.635299 | 0.468895 |
| Eritrea           | 1994 | 0.617765 | 0.463212 |
| Eritrea           | 1995 | 0.585629 | 0.44997  |

|         |      |          |          |
|---------|------|----------|----------|
| Eritrea | 1996 | 0.592799 | 0.455702 |
| Eritrea | 1997 | 0.604464 | 0.46541  |
| Eritrea | 1998 | 0.622404 | 0.477271 |
| Eritrea | 1999 | 0.635233 | 0.488692 |
| Eritrea | 2000 | 0.652666 | 0.502612 |
| Eritrea | 2001 | 0.672426 | 0.51557  |
| Eritrea | 2002 | 0.682087 | 0.528655 |
| Eritrea | 2003 | 0.696141 | 0.540144 |
| Eritrea | 2004 | 0.706811 | 0.548242 |
| Eritrea | 2005 | 0.717387 | 0.555826 |
| Eritrea | 2006 | 0.721666 | 0.559545 |
| Eritrea | 2007 | 0.726562 | 0.563659 |
| Eritrea | 2008 | 0.729562 | 0.567179 |
| Eritrea | 2009 | 0.733471 | 0.571313 |
| Eritrea | 2010 | 0.736993 | 0.57369  |
| Eritrea | 2011 | 0.747012 | 0.581633 |
| Eritrea | 2012 | 0.75857  | 0.592977 |
| Eritrea | 2013 | 0.770296 | 0.603493 |
| Eritrea | 2014 | 0.780923 | 0.612417 |
| Eritrea | 2015 | 0.787631 | 0.620088 |
| Eritrea | 2016 | 0.794511 | 0.628143 |
| Eritrea | 2017 | 0.800615 | 0.636744 |
| Eritrea | 2018 | 0.801815 | 0.641395 |
| Eritrea | 2019 | 0.803849 | 0.647501 |
| Estonia | 1990 | 1.274667 | 0.544356 |

|         |      |          |          |
|---------|------|----------|----------|
| Estonia | 1991 | 1.290002 | 0.556613 |
| Estonia | 1992 | 1.239721 | 0.541388 |
| Estonia | 1993 | 1.200974 | 0.542798 |
| Estonia | 1994 | 1.151173 | 0.550592 |
| Estonia | 1995 | 1.128166 | 0.54486  |
| Estonia | 1996 | 1.176935 | 0.562217 |
| Estonia | 1997 | 1.14876  | 0.552321 |
| Estonia | 1998 | 1.1261   | 0.544524 |
| Estonia | 1999 | 1.166972 | 0.555235 |
| Estonia | 2000 | 1.255561 | 0.597795 |
| Estonia | 2001 | 1.252541 | 0.599208 |
| Estonia | 2002 | 1.205019 | 0.568907 |
| Estonia | 2003 | 1.249495 | 0.580201 |
| Estonia | 2004 | 1.197993 | 0.548705 |
| Estonia | 2005 | 1.175965 | 0.531529 |
| Estonia | 2006 | 1.137999 | 0.513165 |
| Estonia | 2007 | 1.110521 | 0.499568 |
| Estonia | 2008 | 1.187032 | 0.526966 |
| Estonia | 2009 | 1.18254  | 0.520329 |
| Estonia | 2010 | 1.25962  | 0.543306 |
| Estonia | 2011 | 1.367921 | 0.587629 |
| Estonia | 2012 | 1.43354  | 0.605071 |
| Estonia | 2013 | 1.638015 | 0.678218 |
| Estonia | 2014 | 1.681019 | 0.688145 |
| Estonia | 2015 | 1.90245  | 0.76673  |

|          |      |          |          |
|----------|------|----------|----------|
| Estonia  | 2016 | 1.966618 | 0.787203 |
| Estonia  | 2017 | 1.978323 | 0.797514 |
| Estonia  | 2018 | 1.945837 | 0.792401 |
| Estonia  | 2019 | 1.91689  | 0.789282 |
| Eswatini | 1990 | 0.643432 | 0.445885 |
| Eswatini | 1991 | 0.655902 | 0.454929 |
| Eswatini | 1992 | 0.663034 | 0.459787 |
| Eswatini | 1993 | 0.659477 | 0.458163 |
| Eswatini | 1994 | 0.641934 | 0.450227 |
| Eswatini | 1995 | 0.629765 | 0.446376 |
| Eswatini | 1996 | 0.592986 | 0.428342 |
| Eswatini | 1997 | 0.575288 | 0.419633 |
| Eswatini | 1998 | 0.56769  | 0.418709 |
| Eswatini | 1999 | 0.58138  | 0.430021 |
| Eswatini | 2000 | 0.615204 | 0.455989 |
| Eswatini | 2001 | 0.622836 | 0.464538 |
| Eswatini | 2002 | 0.648366 | 0.482734 |
| Eswatini | 2003 | 0.645587 | 0.482052 |
| Eswatini | 2004 | 0.637776 | 0.475359 |
| Eswatini | 2005 | 0.637936 | 0.473051 |
| Eswatini | 2006 | 0.619484 | 0.459317 |
| Eswatini | 2007 | 0.596666 | 0.442398 |
| Eswatini | 2008 | 0.56799  | 0.420904 |
| Eswatini | 2009 | 0.549777 | 0.405457 |
| Eswatini | 2010 | 0.532729 | 0.390103 |

|          |      |          |          |
|----------|------|----------|----------|
| Eswatini | 2011 | 0.519468 | 0.377501 |
| Eswatini | 2012 | 0.512695 | 0.369766 |
| Eswatini | 2013 | 0.511534 | 0.36584  |
| Eswatini | 2014 | 0.513582 | 0.364059 |
| Eswatini | 2015 | 0.512443 | 0.360656 |
| Eswatini | 2016 | 0.510467 | 0.35706  |
| Eswatini | 2017 | 0.514681 | 0.357329 |
| Eswatini | 2018 | 0.519338 | 0.357931 |
| Eswatini | 2019 | 0.524167 | 0.358968 |
| Ethiopia | 1990 | 0.720756 | 0.703844 |
| Ethiopia | 1991 | 0.715509 | 0.706314 |
| Ethiopia | 1992 | 0.718831 | 0.717897 |
| Ethiopia | 1993 | 0.720067 | 0.728498 |
| Ethiopia | 1994 | 0.721361 | 0.73772  |
| Ethiopia | 1995 | 0.720699 | 0.743548 |
| Ethiopia | 1996 | 0.720125 | 0.749094 |
| Ethiopia | 1997 | 0.718258 | 0.753969 |
| Ethiopia | 1998 | 0.724515 | 0.767056 |
| Ethiopia | 1999 | 0.728246 | 0.775891 |
| Ethiopia | 2000 | 0.71538  | 0.766805 |
| Ethiopia | 2001 | 0.705973 | 0.758366 |
| Ethiopia | 2002 | 0.699858 | 0.754009 |
| Ethiopia | 2003 | 0.692711 | 0.749821 |
| Ethiopia | 2004 | 0.689158 | 0.749999 |
| Ethiopia | 2005 | 0.690604 | 0.752846 |



|          |      |          |          |
|----------|------|----------|----------|
| Ethiopia | 2006 | 0.682452 | 0.745788 |
| Ethiopia | 2007 | 0.671544 | 0.734216 |
| Ethiopia | 2008 | 0.659778 | 0.722532 |
| Ethiopia | 2009 | 0.65182  | 0.715305 |
| Ethiopia | 2010 | 0.643618 | 0.708825 |
| Ethiopia | 2011 | 0.641285 | 0.705564 |
| Ethiopia | 2012 | 0.633994 | 0.697198 |
| Ethiopia | 2013 | 0.62824  | 0.691475 |
| Ethiopia | 2014 | 0.626243 | 0.687038 |
| Ethiopia | 2015 | 0.625936 | 0.68562  |
| Ethiopia | 2016 | 0.629331 | 0.686995 |
| Ethiopia | 2017 | 0.638242 | 0.693243 |
| Ethiopia | 2018 | 0.645523 | 0.699145 |
| Ethiopia | 2019 | 0.651966 | 0.705008 |
| Fiji     | 1990 | 0.73655  | 0.628208 |
| Fiji     | 1991 | 0.723556 | 0.608009 |
| Fiji     | 1992 | 0.714756 | 0.592527 |
| Fiji     | 1993 | 0.705691 | 0.578871 |
| Fiji     | 1994 | 0.69546  | 0.563871 |
| Fiji     | 1995 | 0.691654 | 0.557138 |
| Fiji     | 1996 | 0.700723 | 0.561307 |
| Fiji     | 1997 | 0.704771 | 0.562422 |
| Fiji     | 1998 | 0.706182 | 0.563969 |
| Fiji     | 1999 | 0.687221 | 0.548343 |
| Fiji     | 2000 | 0.689676 | 0.54438  |

|         |      |          |          |
|---------|------|----------|----------|
| Fiji    | 2001 | 0.674743 | 0.523954 |
| Fiji    | 2002 | 0.714503 | 0.533768 |
| Fiji    | 2003 | 0.766211 | 0.56517  |
| Fiji    | 2004 | 0.772718 | 0.564366 |
| Fiji    | 2005 | 0.738173 | 0.546633 |
| Fiji    | 2006 | 0.729158 | 0.534349 |
| Fiji    | 2007 | 0.744471 | 0.528667 |
| Fiji    | 2008 | 0.779592 | 0.571697 |
| Fiji    | 2009 | 0.799191 | 0.589837 |
| Fiji    | 2010 | 0.774052 | 0.569211 |
| Fiji    | 2011 | 0.744256 | 0.551047 |
| Fiji    | 2012 | 0.721319 | 0.541473 |
| Fiji    | 2013 | 0.719478 | 0.54105  |
| Fiji    | 2014 | 0.721526 | 0.53809  |
| Fiji    | 2015 | 0.728084 | 0.540392 |
| Fiji    | 2016 | 0.734806 | 0.543516 |
| Fiji    | 2017 | 0.741654 | 0.545391 |
| Fiji    | 2018 | 0.748133 | 0.547693 |
| Fiji    | 2019 | 0.754193 | 0.549577 |
| Finland | 1990 | 1.369762 | 0.651588 |
| Finland | 1991 | 1.404089 | 0.664806 |
| Finland | 1992 | 1.447397 | 0.683359 |
| Finland | 1993 | 1.473253 | 0.693502 |
| Finland | 1994 | 1.479108 | 0.699452 |
| Finland | 1995 | 1.437902 | 0.685172 |

|         |      |          |          |
|---------|------|----------|----------|
| Finland | 1996 | 1.4051   | 0.675676 |
| Finland | 1997 | 1.369332 | 0.663419 |
| Finland | 1998 | 1.273109 | 0.620794 |
| Finland | 1999 | 1.23956  | 0.605483 |
| Finland | 2000 | 1.255896 | 0.613356 |
| Finland | 2001 | 1.225525 | 0.599665 |
| Finland | 2002 | 1.211362 | 0.593411 |
| Finland | 2003 | 1.235058 | 0.606439 |
| Finland | 2004 | 1.240611 | 0.615839 |
| Finland | 2005 | 1.268837 | 0.630773 |
| Finland | 2006 | 1.315871 | 0.655994 |
| Finland | 2007 | 1.334793 | 0.667858 |
| Finland | 2008 | 1.346856 | 0.675729 |
| Finland | 2009 | 1.349785 | 0.681902 |
| Finland | 2010 | 1.368822 | 0.693519 |
| Finland | 2011 | 1.41426  | 0.719419 |
| Finland | 2012 | 1.442101 | 0.737073 |
| Finland | 2013 | 1.456253 | 0.75094  |
| Finland | 2014 | 1.463376 | 0.761748 |
| Finland | 2015 | 1.504316 | 0.790889 |
| Finland | 2016 | 1.486986 | 0.792614 |
| Finland | 2017 | 1.435595 | 0.779339 |
| Finland | 2018 | 1.41599  | 0.781929 |
| Finland | 2019 | 1.386159 | 0.777876 |
| France  | 1990 | 1.124202 | 0.523527 |

|        |      |          |          |
|--------|------|----------|----------|
| France | 1991 | 1.122316 | 0.524504 |
| France | 1992 | 1.12034  | 0.524787 |
| France | 1993 | 1.117802 | 0.526191 |
| France | 1994 | 1.118268 | 0.528797 |
| France | 1995 | 1.112993 | 0.527024 |
| France | 1996 | 1.101909 | 0.522307 |
| France | 1997 | 1.105504 | 0.522596 |
| France | 1998 | 1.107177 | 0.530535 |
| France | 1999 | 1.10903  | 0.534938 |
| France | 2000 | 1.107854 | 0.537168 |
| France | 2001 | 1.110105 | 0.543565 |
| France | 2002 | 1.102    | 0.545481 |
| France | 2003 | 1.084393 | 0.542172 |
| France | 2004 | 1.077414 | 0.54228  |
| France | 2005 | 1.06193  | 0.535116 |
| France | 2006 | 1.067723 | 0.539183 |
| France | 2007 | 1.075779 | 0.545688 |
| France | 2008 | 1.090466 | 0.555471 |
| France | 2009 | 1.07957  | 0.551918 |
| France | 2010 | 1.086085 | 0.553398 |
| France | 2011 | 1.095191 | 0.55705  |
| France | 2012 | 1.104754 | 0.562202 |
| France | 2013 | 1.102879 | 0.564467 |
| France | 2014 | 1.10743  | 0.570799 |
| France | 2015 | 1.089102 | 0.563704 |

|        |      |          |          |
|--------|------|----------|----------|
| France | 2016 | 1.076047 | 0.555978 |
| France | 2017 | 1.062053 | 0.548646 |
| France | 2018 | 1.078987 | 0.558974 |
| France | 2019 | 1.072237 | 0.558669 |
| Gabon  | 1990 | 0.663018 | 0.510695 |
| Gabon  | 1991 | 0.671655 | 0.519702 |
| Gabon  | 1992 | 0.671388 | 0.52192  |
| Gabon  | 1993 | 0.685336 | 0.532449 |
| Gabon  | 1994 | 0.707166 | 0.549661 |
| Gabon  | 1995 | 0.711069 | 0.555824 |
| Gabon  | 1996 | 0.747609 | 0.582971 |
| Gabon  | 1997 | 0.769173 | 0.598567 |
| Gabon  | 1998 | 0.796265 | 0.617671 |
| Gabon  | 1999 | 0.831864 | 0.641644 |
| Gabon  | 2000 | 0.848369 | 0.653986 |
| Gabon  | 2001 | 0.876541 | 0.676621 |
| Gabon  | 2002 | 0.887885 | 0.685029 |
| Gabon  | 2003 | 0.917659 | 0.709144 |
| Gabon  | 2004 | 0.940511 | 0.72639  |
| Gabon  | 2005 | 0.941471 | 0.727273 |
| Gabon  | 2006 | 0.957229 | 0.739157 |
| Gabon  | 2007 | 0.939534 | 0.730543 |
| Gabon  | 2008 | 0.943992 | 0.736346 |
| Gabon  | 2009 | 0.937137 | 0.731371 |
| Gabon  | 2010 | 0.928266 | 0.72189  |

|        |      |          |          |
|--------|------|----------|----------|
| Gabon  | 2011 | 0.931747 | 0.725053 |
| Gabon  | 2012 | 0.920242 | 0.718091 |
| Gabon  | 2013 | 0.907997 | 0.709801 |
| Gabon  | 2014 | 0.913089 | 0.712937 |
| Gabon  | 2015 | 0.921649 | 0.71807  |
| Gabon  | 2016 | 0.920729 | 0.721385 |
| Gabon  | 2017 | 0.921713 | 0.725495 |
| Gabon  | 2018 | 0.922917 | 0.729617 |
| Gabon  | 2019 | 0.923103 | 0.73276  |
| Gambia | 1990 | 0.755805 | 0.755747 |
| Gambia | 1991 | 0.756823 | 0.756088 |
| Gambia | 1992 | 0.758184 | 0.75924  |
| Gambia | 1993 | 0.758936 | 0.757261 |
| Gambia | 1994 | 0.755326 | 0.750572 |
| Gambia | 1995 | 0.753686 | 0.753222 |
| Gambia | 1996 | 0.751364 | 0.743599 |
| Gambia | 1997 | 0.749738 | 0.739091 |
| Gambia | 1998 | 0.750354 | 0.73916  |
| Gambia | 1999 | 0.743484 | 0.732456 |
| Gambia | 2000 | 0.74646  | 0.72468  |
| Gambia | 2001 | 0.746679 | 0.717698 |
| Gambia | 2002 | 0.747766 | 0.711503 |
| Gambia | 2003 | 0.752355 | 0.712861 |
| Gambia | 2004 | 0.755842 | 0.713817 |
| Gambia | 2005 | 0.755955 | 0.71042  |

|         |      |          |          |
|---------|------|----------|----------|
| Gambia  | 2006 | 0.757416 | 0.705952 |
| Gambia  | 2007 | 0.75523  | 0.700773 |
| Gambia  | 2008 | 0.754458 | 0.692666 |
| Gambia  | 2009 | 0.752537 | 0.689476 |
| Gambia  | 2010 | 0.753068 | 0.686471 |
| Gambia  | 2011 | 0.755772 | 0.679598 |
| Gambia  | 2012 | 0.759236 | 0.680795 |
| Gambia  | 2013 | 0.756697 | 0.679521 |
| Gambia  | 2014 | 0.763619 | 0.690755 |
| Gambia  | 2015 | 0.769482 | 0.692325 |
| Gambia  | 2016 | 0.773885 | 0.699811 |
| Gambia  | 2017 | 0.778738 | 0.706126 |
| Gambia  | 2018 | 0.781179 | 0.70658  |
| Gambia  | 2019 | 0.783745 | 0.708702 |
| Georgia | 1990 | 0.890262 | 0.542133 |
| Georgia | 1991 | 0.872831 | 0.536789 |
| Georgia | 1992 | 0.850246 | 0.525619 |
| Georgia | 1993 | 0.863035 | 0.531854 |
| Georgia | 1994 | 0.862277 | 0.535854 |
| Georgia | 1995 | 0.840688 | 0.527101 |
| Georgia | 1996 | 0.842497 | 0.532042 |
| Georgia | 1997 | 0.82724  | 0.521857 |
| Georgia | 1998 | 0.793438 | 0.501139 |
| Georgia | 1999 | 0.801938 | 0.500857 |
| Georgia | 2000 | 0.879865 | 0.543389 |

|         |      |          |          |
|---------|------|----------|----------|
| Georgia | 2001 | 0.899387 | 0.565607 |
| Georgia | 2002 | 0.884306 | 0.551759 |
| Georgia | 2003 | 0.910865 | 0.563177 |
| Georgia | 2004 | 0.933848 | 0.577696 |
| Georgia | 2005 | 0.978952 | 0.607314 |
| Georgia | 2006 | 0.962763 | 0.605212 |
| Georgia | 2007 | 0.930799 | 0.599638 |
| Georgia | 2008 | 0.915016 | 0.592516 |
| Georgia | 2009 | 0.943313 | 0.605152 |
| Georgia | 2010 | 0.947623 | 0.596383 |
| Georgia | 2011 | 0.95614  | 0.599604 |
| Georgia | 2012 | 0.978096 | 0.606573 |
| Georgia | 2013 | 1.014494 | 0.623579 |
| Georgia | 2014 | 0.991503 | 0.604425 |
| Georgia | 2015 | 0.965315 | 0.584449 |
| Georgia | 2016 | 0.950849 | 0.575343 |
| Georgia | 2017 | 0.947486 | 0.573143 |
| Georgia | 2018 | 0.940168 | 0.571439 |
| Georgia | 2019 | 0.93624  | 0.569532 |
| Germany | 1990 | 1.487969 | 0.738576 |
| Germany | 1991 | 1.466275 | 0.722103 |
| Germany | 1992 | 1.461023 | 0.715904 |
| Germany | 1993 | 1.449296 | 0.70554  |
| Germany | 1994 | 1.444447 | 0.697681 |
| Germany | 1995 | 1.444922 | 0.689009 |



|         |      |          |          |
|---------|------|----------|----------|
| Germany | 1996 | 1.453565 | 0.686347 |
| Germany | 1997 | 1.483836 | 0.696893 |
| Germany | 1998 | 1.514594 | 0.710752 |
| Germany | 1999 | 1.533725 | 0.718637 |
| Germany | 2000 | 1.553591 | 0.722254 |
| Germany | 2001 | 1.573124 | 0.730431 |
| Germany | 2002 | 1.582824 | 0.736649 |
| Germany | 2003 | 1.574148 | 0.73842  |
| Germany | 2004 | 1.599898 | 0.756378 |
| Germany | 2005 | 1.612897 | 0.768233 |
| Germany | 2006 | 1.602888 | 0.772032 |
| Germany | 2007 | 1.593446 | 0.782936 |
| Germany | 2008 | 1.578264 | 0.792426 |
| Germany | 2009 | 1.556308 | 0.796146 |
| Germany | 2010 | 1.52725  | 0.787571 |
| Germany | 2011 | 1.537922 | 0.783764 |
| Germany | 2012 | 1.527116 | 0.781158 |
| Germany | 2013 | 1.517234 | 0.781468 |
| Germany | 2014 | 1.517122 | 0.78274  |
| Germany | 2015 | 1.509834 | 0.785566 |
| Germany | 2016 | 1.518061 | 0.798449 |
| Germany | 2017 | 1.476666 | 0.804041 |
| Germany | 2018 | 1.444126 | 0.80565  |
| Germany | 2019 | 1.416778 | 0.808654 |
| Ghana   | 1990 | 1.389388 | 1.181071 |

|       |      |          |          |
|-------|------|----------|----------|
| Ghana | 1991 | 1.395297 | 1.186086 |
| Ghana | 1992 | 1.406856 | 1.198388 |
| Ghana | 1993 | 1.408088 | 1.203505 |
| Ghana | 1994 | 1.396314 | 1.196408 |
| Ghana | 1995 | 1.382803 | 1.186929 |
| Ghana | 1996 | 1.372057 | 1.179342 |
| Ghana | 1997 | 1.34008  | 1.155532 |
| Ghana | 1998 | 1.304774 | 1.127515 |
| Ghana | 1999 | 1.250913 | 1.082697 |
| Ghana | 2000 | 1.228704 | 1.061556 |
| Ghana | 2001 | 1.221506 | 1.049951 |
| Ghana | 2002 | 1.201741 | 1.027726 |
| Ghana | 2003 | 1.174967 | 1.001459 |
| Ghana | 2004 | 1.13319  | 0.962102 |
| Ghana | 2005 | 1.104291 | 0.932732 |
| Ghana | 2006 | 1.079481 | 0.906283 |
| Ghana | 2007 | 1.070195 | 0.892958 |
| Ghana | 2008 | 1.057559 | 0.875779 |
| Ghana | 2009 | 1.052341 | 0.864954 |
| Ghana | 2010 | 1.05498  | 0.860277 |
| Ghana | 2011 | 1.049814 | 0.85044  |
| Ghana | 2012 | 1.043791 | 0.839396 |
| Ghana | 2013 | 1.043172 | 0.832323 |
| Ghana | 2014 | 1.057851 | 0.837805 |
| Ghana | 2015 | 1.068515 | 0.839101 |

|        |      |          |          |
|--------|------|----------|----------|
| Ghana  | 2016 | 1.087431 | 0.848637 |
| Ghana  | 2017 | 1.108864 | 0.860005 |
| Ghana  | 2018 | 1.125883 | 0.868676 |
| Ghana  | 2019 | 1.142967 | 0.877856 |
| Greece | 1990 | 1.161016 | 0.870098 |
| Greece | 1991 | 1.167773 | 0.882825 |
| Greece | 1992 | 1.161076 | 0.883274 |
| Greece | 1993 | 1.161909 | 0.888873 |
| Greece | 1994 | 1.167579 | 0.899013 |
| Greece | 1995 | 1.161049 | 0.897684 |
| Greece | 1996 | 1.147164 | 0.891019 |
| Greece | 1997 | 1.144252 | 0.892744 |
| Greece | 1998 | 1.149091 | 0.900029 |
| Greece | 1999 | 1.119722 | 0.880614 |
| Greece | 2000 | 1.101564 | 0.871094 |
| Greece | 2001 | 1.115135 | 0.886731 |
| Greece | 2002 | 1.140613 | 0.916072 |
| Greece | 2003 | 1.15732  | 0.940811 |
| Greece | 2004 | 1.159749 | 0.955428 |
| Greece | 2005 | 1.163923 | 0.972318 |
| Greece | 2006 | 1.182637 | 0.993248 |
| Greece | 2007 | 1.175831 | 0.97592  |
| Greece | 2008 | 1.190464 | 0.969062 |
| Greece | 2009 | 1.153453 | 0.941996 |
| Greece | 2010 | 1.136643 | 0.928388 |

|           |      |          |          |
|-----------|------|----------|----------|
| Greece    | 2011 | 1.105891 | 0.892206 |
| Greece    | 2012 | 1.086592 | 0.867041 |
| Greece    | 2013 | 1.079777 | 0.850836 |
| Greece    | 2014 | 1.04619  | 0.814348 |
| Greece    | 2015 | 1.030625 | 0.789385 |
| Greece    | 2016 | 1.028167 | 0.775855 |
| Greece    | 2017 | 1.037304 | 0.773643 |
| Greece    | 2018 | 1.091329 | 0.802598 |
| Greece    | 2019 | 1.105053 | 0.80773  |
| Greenland | 1990 | 0.849346 | 0.693694 |
| Greenland | 1991 | 0.859043 | 0.699506 |
| Greenland | 1992 | 0.874645 | 0.708875 |
| Greenland | 1993 | 1.013236 | 0.83206  |
| Greenland | 1994 | 1.037787 | 0.873406 |
| Greenland | 1995 | 1.033608 | 0.886208 |
| Greenland | 1996 | 1.060839 | 0.925261 |
| Greenland | 1997 | 1.091328 | 0.971297 |
| Greenland | 1998 | 1.046899 | 0.961443 |
| Greenland | 1999 | 0.997845 | 0.942449 |
| Greenland | 2000 | 0.94211  | 0.901702 |
| Greenland | 2001 | 0.936488 | 0.907813 |
| Greenland | 2002 | 0.927296 | 0.904154 |
| Greenland | 2003 | 0.835465 | 0.819147 |
| Greenland | 2004 | 0.69175  | 0.688599 |
| Greenland | 2005 | 0.709612 | 0.700803 |

|           |      |          |          |
|-----------|------|----------|----------|
| Greenland | 2006 | 0.706598 | 0.692802 |
| Greenland | 2007 | 0.705793 | 0.686308 |
| Greenland | 2008 | 0.700539 | 0.680087 |
| Greenland | 2009 | 0.683503 | 0.668978 |
| Greenland | 2010 | 0.672699 | 0.652435 |
| Greenland | 2011 | 0.660619 | 0.635534 |
| Greenland | 2012 | 0.635943 | 0.609095 |
| Greenland | 2013 | 0.625224 | 0.595312 |
| Greenland | 2014 | 0.621571 | 0.594696 |
| Greenland | 2015 | 0.622625 | 0.590524 |
| Greenland | 2016 | 0.63024  | 0.59461  |
| Greenland | 2017 | 0.631927 | 0.596305 |
| Greenland | 2018 | 0.636475 | 0.598319 |
| Greenland | 2019 | 0.633015 | 0.600239 |
| Grenada   | 1990 | 0.797821 | 0.554947 |
| Grenada   | 1991 | 0.791908 | 0.547582 |
| Grenada   | 1992 | 0.797965 | 0.545611 |
| Grenada   | 1993 | 0.866844 | 0.585903 |
| Grenada   | 1994 | 0.868726 | 0.585653 |
| Grenada   | 1995 | 0.866269 | 0.584739 |
| Grenada   | 1996 | 0.831677 | 0.564078 |
| Grenada   | 1997 | 0.811707 | 0.552665 |
| Grenada   | 1998 | 0.799312 | 0.544226 |
| Grenada   | 1999 | 0.688282 | 0.455645 |
| Grenada   | 2000 | 0.68774  | 0.439827 |

|         |      |          |          |
|---------|------|----------|----------|
| Grenada | 2001 | 0.702495 | 0.43759  |
| Grenada | 2002 | 0.711655 | 0.432377 |
| Grenada | 2003 | 0.71962  | 0.428494 |
| Grenada | 2004 | 0.732755 | 0.430247 |
| Grenada | 2005 | 0.760413 | 0.437206 |
| Grenada | 2006 | 0.78936  | 0.443967 |
| Grenada | 2007 | 0.822661 | 0.462776 |
| Grenada | 2008 | 0.842693 | 0.483301 |
| Grenada | 2009 | 0.882412 | 0.508339 |
| Grenada | 2010 | 0.903844 | 0.527307 |
| Grenada | 2011 | 0.928404 | 0.573847 |
| Grenada | 2012 | 1.001204 | 0.718206 |
| Grenada | 2013 | 0.981917 | 0.7194   |
| Grenada | 2014 | 0.951772 | 0.711073 |
| Grenada | 2015 | 0.919374 | 0.703207 |
| Grenada | 2016 | 0.859129 | 0.659112 |
| Grenada | 2017 | 0.835568 | 0.652602 |
| Grenada | 2018 | 0.826236 | 0.657412 |
| Grenada | 2019 | 0.810856 | 0.655619 |
| Guam    | 1990 | 1.204419 | 1.189679 |
| Guam    | 1991 | 1.208766 | 1.188058 |
| Guam    | 1992 | 1.195287 | 1.167342 |
| Guam    | 1993 | 1.16717  | 1.105228 |
| Guam    | 1994 | 1.107875 | 1.004316 |
| Guam    | 1995 | 1.172072 | 1.084015 |

|           |      |          |          |
|-----------|------|----------|----------|
| Guam      | 1996 | 1.186921 | 1.127987 |
| Guam      | 1997 | 1.133647 | 1.085355 |
| Guam      | 1998 | 1.1296   | 1.075936 |
| Guam      | 1999 | 1.158874 | 1.091652 |
| Guam      | 2000 | 1.174389 | 1.100938 |
| Guam      | 2001 | 1.203948 | 1.136096 |
| Guam      | 2002 | 1.200842 | 1.132682 |
| Guam      | 2003 | 1.238955 | 1.160038 |
| Guam      | 2004 | 1.113806 | 1.021279 |
| Guam      | 2005 | 0.964523 | 0.850896 |
| Guam      | 2006 | 0.944381 | 0.819772 |
| Guam      | 2007 | 0.929106 | 0.797947 |
| Guam      | 2008 | 0.923572 | 0.78604  |
| Guam      | 2009 | 0.931624 | 0.788499 |
| Guam      | 2010 | 0.940753 | 0.797387 |
| Guam      | 2011 | 0.956968 | 0.812158 |
| Guam      | 2012 | 0.983131 | 0.836726 |
| Guam      | 2013 | 1.004146 | 0.860112 |
| Guam      | 2014 | 1.001106 | 0.863148 |
| Guam      | 2015 | 1.003953 | 0.86564  |
| Guam      | 2016 | 0.994553 | 0.85511  |
| Guam      | 2017 | 1.009881 | 0.866865 |
| Guam      | 2018 | 1.025338 | 0.885139 |
| Guam      | 2019 | 1.062923 | 0.918484 |
| Guatemala | 1990 | 0.953023 | 0.953895 |

|           |      |          |          |
|-----------|------|----------|----------|
| Guatemala | 1991 | 0.933729 | 0.929254 |
| Guatemala | 1992 | 0.92926  | 0.918512 |
| Guatemala | 1993 | 0.914013 | 0.90221  |
| Guatemala | 1994 | 0.896312 | 0.885135 |
| Guatemala | 1995 | 0.890006 | 0.871973 |
| Guatemala | 1996 | 0.901921 | 0.86863  |
| Guatemala | 1997 | 0.899852 | 0.857182 |
| Guatemala | 1998 | 0.872046 | 0.812846 |
| Guatemala | 1999 | 0.865173 | 0.791137 |
| Guatemala | 2000 | 0.863256 | 0.781043 |
| Guatemala | 2001 | 0.820782 | 0.743524 |
| Guatemala | 2002 | 0.83644  | 0.740421 |
| Guatemala | 2003 | 0.84415  | 0.738636 |
| Guatemala | 2004 | 0.843046 | 0.720606 |
| Guatemala | 2005 | 0.838576 | 0.707155 |
| Guatemala | 2006 | 0.856915 | 0.71003  |
| Guatemala | 2007 | 0.868494 | 0.712748 |
| Guatemala | 2008 | 0.88503  | 0.714982 |
| Guatemala | 2009 | 0.910003 | 0.728899 |
| Guatemala | 2010 | 0.930968 | 0.739534 |
| Guatemala | 2011 | 0.943079 | 0.746912 |
| Guatemala | 2012 | 0.956022 | 0.754441 |
| Guatemala | 2013 | 0.95592  | 0.752758 |
| Guatemala | 2014 | 0.970023 | 0.757865 |
| Guatemala | 2015 | 0.969041 | 0.752183 |



|               |      |          |          |
|---------------|------|----------|----------|
| Guatemala     | 2016 | 0.983854 | 0.758866 |
| Guatemala     | 2017 | 0.994562 | 0.768067 |
| Guatemala     | 2018 | 0.99077  | 0.763013 |
| Guatemala     | 2019 | 0.995586 | 0.764309 |
| Guinea-Bissau | 1990 | 0.748122 | 0.670412 |
| Guinea-Bissau | 1991 | 0.75664  | 0.671111 |
| Guinea-Bissau | 1992 | 0.764453 | 0.671795 |
| Guinea-Bissau | 1993 | 0.770896 | 0.671429 |
| Guinea-Bissau | 1994 | 0.775841 | 0.67024  |
| Guinea-Bissau | 1995 | 0.778009 | 0.667293 |
| Guinea-Bissau | 1996 | 0.781511 | 0.664792 |
| Guinea-Bissau | 1997 | 0.784534 | 0.662213 |
| Guinea-Bissau | 1998 | 0.781983 | 0.655103 |
| Guinea-Bissau | 1999 | 0.773202 | 0.643304 |
| Guinea-Bissau | 2000 | 0.774928 | 0.639101 |
| Guinea-Bissau | 2001 | 0.769671 | 0.63055  |
| Guinea-Bissau | 2002 | 0.776817 | 0.632411 |
| Guinea-Bissau | 2003 | 0.783424 | 0.634572 |
| Guinea-Bissau | 2004 | 0.781804 | 0.630986 |
| Guinea-Bissau | 2005 | 0.777461 | 0.625183 |
| Guinea-Bissau | 2006 | 0.785814 | 0.629214 |
| Guinea-Bissau | 2007 | 0.790956 | 0.63183  |
| Guinea-Bissau | 2008 | 0.789619 | 0.630173 |
| Guinea-Bissau | 2009 | 0.791031 | 0.630407 |
| Guinea-Bissau | 2010 | 0.788492 | 0.627204 |

|               |      |          |          |
|---------------|------|----------|----------|
| Guinea-Bissau | 2011 | 0.780258 | 0.621232 |
| Guinea-Bissau | 2012 | 0.77979  | 0.621828 |
| Guinea-Bissau | 2013 | 0.775523 | 0.619504 |
| Guinea-Bissau | 2014 | 0.781231 | 0.623934 |
| Guinea-Bissau | 2015 | 0.785211 | 0.627208 |
| Guinea-Bissau | 2016 | 0.790123 | 0.632173 |
| Guinea-Bissau | 2017 | 0.794982 | 0.636694 |
| Guinea-Bissau | 2018 | 0.794557 | 0.636869 |
| Guinea-Bissau | 2019 | 0.79691  | 0.639962 |
| Guinea        | 1990 | 1.106482 | 1.06805  |
| Guinea        | 1991 | 1.101821 | 1.062402 |
| Guinea        | 1992 | 1.092566 | 1.051668 |
| Guinea        | 1993 | 1.079614 | 1.036735 |
| Guinea        | 1994 | 1.063496 | 1.018359 |
| Guinea        | 1995 | 1.044157 | 0.994427 |
| Guinea        | 1996 | 1.023563 | 0.970226 |
| Guinea        | 1997 | 1.003974 | 0.94782  |
| Guinea        | 1998 | 0.984752 | 0.924564 |
| Guinea        | 1999 | 0.959149 | 0.894479 |
| Guinea        | 2000 | 0.948271 | 0.875656 |
| Guinea        | 2001 | 0.93673  | 0.86105  |
| Guinea        | 2002 | 0.926789 | 0.848561 |
| Guinea        | 2003 | 0.921873 | 0.840532 |
| Guinea        | 2004 | 0.914807 | 0.83004  |
| Guinea        | 2005 | 0.909379 | 0.821056 |

|        |      |          |          |
|--------|------|----------|----------|
| Guinea | 2006 | 0.897855 | 0.809873 |
| Guinea | 2007 | 0.88313  | 0.797058 |
| Guinea | 2008 | 0.8682   | 0.784253 |
| Guinea | 2009 | 0.856308 | 0.774402 |
| Guinea | 2010 | 0.844945 | 0.765219 |
| Guinea | 2011 | 0.838392 | 0.761209 |
| Guinea | 2012 | 0.832401 | 0.75916  |
| Guinea | 2013 | 0.825926 | 0.757267 |
| Guinea | 2014 | 0.825605 | 0.761087 |
| Guinea | 2015 | 0.827532 | 0.766111 |
| Guinea | 2016 | 0.830462 | 0.774096 |
| Guinea | 2017 | 0.833695 | 0.783024 |
| Guinea | 2018 | 0.834033 | 0.789338 |
| Guinea | 2019 | 0.836231 | 0.796133 |
| Guyana | 1990 | 0.804795 | 0.730845 |
| Guyana | 1991 | 0.825743 | 0.745172 |
| Guyana | 1992 | 0.815942 | 0.730925 |
| Guyana | 1993 | 0.815344 | 0.715393 |
| Guyana | 1994 | 0.833385 | 0.730953 |
| Guyana | 1995 | 0.82273  | 0.725093 |
| Guyana | 1996 | 0.826799 | 0.72395  |
| Guyana | 1997 | 0.801758 | 0.710721 |
| Guyana | 1998 | 0.804478 | 0.710939 |
| Guyana | 1999 | 0.816289 | 0.717467 |
| Guyana | 2000 | 0.851078 | 0.75824  |

|        |      |          |          |
|--------|------|----------|----------|
| Guyana | 2001 | 0.856085 | 0.770243 |
| Guyana | 2002 | 0.868114 | 0.792286 |
| Guyana | 2003 | 0.88199  | 0.808553 |
| Guyana | 2004 | 0.881747 | 0.805175 |
| Guyana | 2005 | 0.876973 | 0.799695 |
| Guyana | 2006 | 0.86259  | 0.785305 |
| Guyana | 2007 | 0.871755 | 0.796174 |
| Guyana | 2008 | 0.866064 | 0.79292  |
| Guyana | 2009 | 0.856384 | 0.776095 |
| Guyana | 2010 | 0.870928 | 0.791752 |
| Guyana | 2011 | 0.864618 | 0.787339 |
| Guyana | 2012 | 0.858249 | 0.769835 |
| Guyana | 2013 | 0.868019 | 0.754845 |
| Guyana | 2014 | 0.883459 | 0.756936 |
| Guyana | 2015 | 0.904528 | 0.783773 |
| Guyana | 2016 | 0.909773 | 0.785122 |
| Guyana | 2017 | 0.907778 | 0.779852 |
| Guyana | 2018 | 0.916706 | 0.792253 |
| Guyana | 2019 | 0.917252 | 0.792395 |
| Haiti  | 1990 | 0.848252 | 0.694669 |
| Haiti  | 1991 | 0.851834 | 0.699622 |
| Haiti  | 1992 | 0.858366 | 0.705985 |
| Haiti  | 1993 | 0.868323 | 0.715498 |
| Haiti  | 1994 | 0.889488 | 0.733226 |
| Haiti  | 1995 | 0.884666 | 0.730909 |

|          |      |          |          |
|----------|------|----------|----------|
| Haiti    | 1996 | 0.885902 | 0.73329  |
| Haiti    | 1997 | 0.88977  | 0.737561 |
| Haiti    | 1998 | 0.897728 | 0.746391 |
| Haiti    | 1999 | 0.918178 | 0.763662 |
| Haiti    | 2000 | 0.933843 | 0.777576 |
| Haiti    | 2001 | 0.952387 | 0.793799 |
| Haiti    | 2002 | 0.965378 | 0.805915 |
| Haiti    | 2003 | 0.979128 | 0.818581 |
| Haiti    | 2004 | 0.996137 | 0.833853 |
| Haiti    | 2005 | 1.011615 | 0.848181 |
| Haiti    | 2006 | 1.003287 | 0.843106 |
| Haiti    | 2007 | 0.991817 | 0.835123 |
| Haiti    | 2008 | 0.977956 | 0.825209 |
| Haiti    | 2009 | 0.969319 | 0.818318 |
| Haiti    | 2010 | 0.971384 | 0.814256 |
| Haiti    | 2011 | 0.977353 | 0.812342 |
| Haiti    | 2012 | 0.970589 | 0.807299 |
| Haiti    | 2013 | 0.964412 | 0.801409 |
| Haiti    | 2014 | 0.961933 | 0.797931 |
| Haiti    | 2015 | 0.961316 | 0.795943 |
| Haiti    | 2016 | 0.958705 | 0.793089 |
| Haiti    | 2017 | 0.953425 | 0.7883   |
| Haiti    | 2018 | 0.949688 | 0.78419  |
| Haiti    | 2019 | 0.950462 | 0.784143 |
| Honduras | 1990 | 0.931423 | 0.792876 |

|          |      |          |          |
|----------|------|----------|----------|
| Honduras | 1991 | 0.893526 | 0.757388 |
| Honduras | 1992 | 0.98682  | 0.839842 |
| Honduras | 1993 | 0.96852  | 0.824803 |
| Honduras | 1994 | 0.959285 | 0.818048 |
| Honduras | 1995 | 1.132512 | 0.982388 |
| Honduras | 1996 | 1.204171 | 1.080562 |
| Honduras | 1997 | 1.196654 | 1.084657 |
| Honduras | 1998 | 1.188782 | 1.087144 |
| Honduras | 1999 | 1.177838 | 1.086961 |
| Honduras | 2000 | 1.167179 | 1.085797 |
| Honduras | 2001 | 1.166044 | 1.09074  |
| Honduras | 2002 | 1.190753 | 1.118393 |
| Honduras | 2003 | 1.220312 | 1.149288 |
| Honduras | 2004 | 1.21409  | 1.147758 |
| Honduras | 2005 | 1.210856 | 1.145859 |
| Honduras | 2006 | 1.206554 | 1.142104 |
| Honduras | 2007 | 1.201772 | 1.137077 |
| Honduras | 2008 | 1.193002 | 1.129034 |
| Honduras | 2009 | 1.17622  | 1.114785 |
| Honduras | 2010 | 1.158652 | 1.099057 |
| Honduras | 2011 | 1.132415 | 1.071005 |
| Honduras | 2012 | 1.049605 | 0.966428 |
| Honduras | 2013 | 1.061289 | 0.964852 |
| Honduras | 2014 | 1.072882 | 0.964053 |
| Honduras | 2015 | 1.084842 | 0.9635   |

|          |      |          |          |
|----------|------|----------|----------|
| Honduras | 2016 | 1.097255 | 0.964191 |
| Honduras | 2017 | 1.113633 | 0.969835 |
| Honduras | 2018 | 1.133398 | 0.979179 |
| Honduras | 2019 | 1.150707 | 0.987235 |
| Hungary  | 1990 | 1.248905 | 0.783216 |
| Hungary  | 1991 | 1.273197 | 0.788897 |
| Hungary  | 1992 | 1.235009 | 0.764683 |
| Hungary  | 1993 | 1.231176 | 0.75623  |
| Hungary  | 1994 | 1.207315 | 0.733594 |
| Hungary  | 1995 | 1.224856 | 0.735564 |
| Hungary  | 1996 | 1.257931 | 0.743862 |
| Hungary  | 1997 | 1.308379 | 0.767016 |
| Hungary  | 1998 | 1.328475 | 0.772198 |
| Hungary  | 1999 | 1.338323 | 0.77329  |
| Hungary  | 2000 | 1.35984  | 0.776331 |
| Hungary  | 2001 | 1.359909 | 0.773614 |
| Hungary  | 2002 | 1.345923 | 0.763105 |
| Hungary  | 2003 | 1.355023 | 0.763996 |
| Hungary  | 2004 | 1.373922 | 0.770584 |
| Hungary  | 2005 | 1.367215 | 0.760508 |
| Hungary  | 2006 | 1.414381 | 0.777394 |
| Hungary  | 2007 | 1.476528 | 0.803333 |
| Hungary  | 2008 | 1.536635 | 0.823527 |
| Hungary  | 2009 | 1.559169 | 0.826695 |
| Hungary  | 2010 | 1.632679 | 0.854821 |

|         |      |          |          |
|---------|------|----------|----------|
| Hungary | 2011 | 1.687514 | 0.88035  |
| Hungary | 2012 | 1.701139 | 0.882161 |
| Hungary | 2013 | 1.757902 | 0.906339 |
| Hungary | 2014 | 1.755502 | 0.906485 |
| Hungary | 2015 | 1.78418  | 0.922637 |
| Hungary | 2016 | 1.735478 | 0.893355 |
| Hungary | 2017 | 1.75693  | 0.901822 |
| Hungary | 2018 | 1.744163 | 0.896852 |
| Hungary | 2019 | 1.776262 | 0.914186 |
| Iceland | 1990 | 0.893067 | 0.617346 |
| Iceland | 1991 | 0.898833 | 0.619624 |
| Iceland | 1992 | 0.904815 | 0.624484 |
| Iceland | 1993 | 0.906251 | 0.624472 |
| Iceland | 1994 | 0.900378 | 0.620242 |
| Iceland | 1995 | 0.886218 | 0.609419 |
| Iceland | 1996 | 0.865607 | 0.592359 |
| Iceland | 1997 | 0.86581  | 0.590292 |
| Iceland | 1998 | 0.87148  | 0.58898  |
| Iceland | 1999 | 0.88968  | 0.596646 |
| Iceland | 2000 | 0.939133 | 0.627518 |
| Iceland | 2001 | 0.946968 | 0.636139 |
| Iceland | 2002 | 0.918585 | 0.619865 |
| Iceland | 2003 | 0.932633 | 0.628488 |
| Iceland | 2004 | 0.943794 | 0.63412  |
| Iceland | 2005 | 0.920771 | 0.620702 |



|         |      |          |          |
|---------|------|----------|----------|
| Iceland | 2006 | 0.875513 | 0.592684 |
| Iceland | 2007 | 0.828134 | 0.560027 |
| Iceland | 2008 | 0.813439 | 0.547711 |
| Iceland | 2009 | 0.797623 | 0.532781 |
| Iceland | 2010 | 0.792424 | 0.527124 |
| Iceland | 2011 | 0.797199 | 0.526861 |
| Iceland | 2012 | 0.781397 | 0.512562 |
| Iceland | 2013 | 0.816639 | 0.53432  |
| Iceland | 2014 | 0.891672 | 0.581795 |
| Iceland | 2015 | 0.868086 | 0.571245 |
| Iceland | 2016 | 0.841589 | 0.554825 |
| Iceland | 2017 | 0.799747 | 0.529264 |
| Iceland | 2018 | 0.791315 | 0.524633 |
| Iceland | 2019 | 0.793979 | 0.527376 |
| India   | 1990 | 0.67198  | 0.651392 |
| India   | 1991 | 0.664991 | 0.649046 |
| India   | 1992 | 0.677239 | 0.659893 |
| India   | 1993 | 0.668435 | 0.653609 |
| India   | 1994 | 0.664197 | 0.64799  |
| India   | 1995 | 0.665584 | 0.647018 |
| India   | 1996 | 0.664089 | 0.640755 |
| India   | 1997 | 0.665254 | 0.640588 |
| India   | 1998 | 0.672932 | 0.647828 |
| India   | 1999 | 0.667927 | 0.643606 |
| India   | 2000 | 0.650053 | 0.62195  |

|           |      |          |          |
|-----------|------|----------|----------|
| India     | 2001 | 0.648807 | 0.6203   |
| India     | 2002 | 0.645959 | 0.616526 |
| India     | 2003 | 0.627599 | 0.596667 |
| India     | 2004 | 0.61961  | 0.587071 |
| India     | 2005 | 0.617428 | 0.584254 |
| India     | 2006 | 0.621215 | 0.591136 |
| India     | 2007 | 0.62422  | 0.595923 |
| India     | 2008 | 0.614686 | 0.585389 |
| India     | 2009 | 0.615543 | 0.579393 |
| India     | 2010 | 0.627674 | 0.58403  |
| India     | 2011 | 0.631651 | 0.587956 |
| India     | 2012 | 0.643951 | 0.600207 |
| India     | 2013 | 0.668672 | 0.612078 |
| India     | 2014 | 0.697766 | 0.627543 |
| India     | 2015 | 0.726946 | 0.655171 |
| India     | 2016 | 0.727723 | 0.661042 |
| India     | 2017 | 0.728097 | 0.663525 |
| India     | 2018 | 0.72818  | 0.659649 |
| India     | 2019 | 0.732114 | 0.664084 |
| Indonesia | 1990 | 0.904475 | 0.805626 |
| Indonesia | 1991 | 0.89592  | 0.79993  |
| Indonesia | 1992 | 0.891139 | 0.796224 |
| Indonesia | 1993 | 0.896197 | 0.800503 |
| Indonesia | 1994 | 0.901232 | 0.804676 |
| Indonesia | 1995 | 0.910442 | 0.812309 |

|                            |      |          |          |
|----------------------------|------|----------|----------|
| Indonesia                  | 1996 | 0.920734 | 0.822294 |
| Indonesia                  | 1997 | 0.925581 | 0.826452 |
| Indonesia                  | 1998 | 0.926823 | 0.827526 |
| Indonesia                  | 1999 | 0.927296 | 0.82819  |
| Indonesia                  | 2000 | 0.921737 | 0.824503 |
| Indonesia                  | 2001 | 0.909081 | 0.815638 |
| Indonesia                  | 2002 | 0.901911 | 0.810925 |
| Indonesia                  | 2003 | 0.900123 | 0.810677 |
| Indonesia                  | 2004 | 0.895603 | 0.807667 |
| Indonesia                  | 2005 | 0.891928 | 0.804423 |
| Indonesia                  | 2006 | 0.887582 | 0.802247 |
| Indonesia                  | 2007 | 0.88547  | 0.801573 |
| Indonesia                  | 2008 | 0.871184 | 0.787266 |
| Indonesia                  | 2009 | 0.857157 | 0.773813 |
| Indonesia                  | 2010 | 0.84432  | 0.761141 |
| Indonesia                  | 2011 | 0.825542 | 0.744336 |
| Indonesia                  | 2012 | 0.794104 | 0.715721 |
| Indonesia                  | 2013 | 0.771454 | 0.694276 |
| Indonesia                  | 2014 | 0.746281 | 0.67051  |
| Indonesia                  | 2015 | 0.731324 | 0.656279 |
| Indonesia                  | 2016 | 0.726472 | 0.653465 |
| Indonesia                  | 2017 | 0.727428 | 0.654714 |
| Indonesia                  | 2018 | 0.726543 | 0.654163 |
| Indonesia                  | 2019 | 0.725323 | 0.653072 |
| Iran (Islamic Republic of) | 1990 | 0.846309 | 0.884767 |

|                            |      |          |          |
|----------------------------|------|----------|----------|
| Iran (Islamic Republic of) | 1991 | 0.850062 | 0.895933 |
| Iran (Islamic Republic of) | 1992 | 0.845513 | 0.897431 |
| Iran (Islamic Republic of) | 1993 | 0.850854 | 0.909371 |
| Iran (Islamic Republic of) | 1994 | 0.846549 | 0.911123 |
| Iran (Islamic Republic of) | 1995 | 0.850514 | 0.921504 |
| Iran (Islamic Republic of) | 1996 | 0.865414 | 0.943133 |
| Iran (Islamic Republic of) | 1997 | 0.868181 | 0.951728 |
| Iran (Islamic Republic of) | 1998 | 0.872144 | 0.960851 |
| Iran (Islamic Republic of) | 1999 | 0.866475 | 0.958325 |
| Iran (Islamic Republic of) | 2000 | 0.887477 | 0.985288 |
| Iran (Islamic Republic of) | 2001 | 0.899208 | 1.00184  |
| Iran (Islamic Republic of) | 2002 | 0.886266 | 0.98971  |
| Iran (Islamic Republic of) | 2003 | 0.872632 | 0.974236 |
| Iran (Islamic Republic of) | 2004 | 0.871049 | 0.970715 |
| Iran (Islamic Republic of) | 2005 | 0.871362 | 0.967471 |
| Iran (Islamic Republic of) | 2006 | 0.858624 | 0.948691 |
| Iran (Islamic Republic of) | 2007 | 0.840085 | 0.919136 |
| Iran (Islamic Republic of) | 2008 | 0.829588 | 0.900372 |
| Iran (Islamic Republic of) | 2009 | 0.824816 | 0.888598 |
| Iran (Islamic Republic of) | 2010 | 0.826351 | 0.879267 |
| Iran (Islamic Republic of) | 2011 | 0.825291 | 0.871341 |
| Iran (Islamic Republic of) | 2012 | 0.823102 | 0.865946 |
| Iran (Islamic Republic of) | 2013 | 0.839203 | 0.883214 |
| Iran (Islamic Republic of) | 2014 | 0.858072 | 0.903726 |
| Iran (Islamic Republic of) | 2015 | 0.87411  | 0.919495 |

|                            |      |          |          |
|----------------------------|------|----------|----------|
| Iran (Islamic Republic of) | 2016 | 0.89088  | 0.937536 |
| Iran (Islamic Republic of) | 2017 | 0.901889 | 0.949128 |
| Iran (Islamic Republic of) | 2018 | 0.906975 | 0.953392 |
| Iran (Islamic Republic of) | 2019 | 0.915692 | 0.961205 |
| Iraq                       | 1990 | 1.038715 | 0.921613 |
| Iraq                       | 1991 | 1.028035 | 0.91066  |
| Iraq                       | 1992 | 1.015177 | 0.901312 |
| Iraq                       | 1993 | 0.996418 | 0.884872 |
| Iraq                       | 1994 | 0.978218 | 0.864977 |
| Iraq                       | 1995 | 0.970719 | 0.857555 |
| Iraq                       | 1996 | 0.96171  | 0.847265 |
| Iraq                       | 1997 | 0.947098 | 0.832703 |
| Iraq                       | 1998 | 0.932334 | 0.819284 |
| Iraq                       | 1999 | 0.923562 | 0.811365 |
| Iraq                       | 2000 | 0.916529 | 0.805188 |
| Iraq                       | 2001 | 0.912447 | 0.800956 |
| Iraq                       | 2002 | 0.91232  | 0.799917 |
| Iraq                       | 2003 | 0.912054 | 0.799067 |
| Iraq                       | 2004 | 0.919368 | 0.806158 |
| Iraq                       | 2005 | 0.923599 | 0.808822 |
| Iraq                       | 2006 | 0.932396 | 0.814381 |
| Iraq                       | 2007 | 0.932736 | 0.812761 |
| Iraq                       | 2008 | 0.928361 | 0.808737 |
| Iraq                       | 2009 | 0.91609  | 0.797203 |
| Iraq                       | 2010 | 0.898317 | 0.779174 |

|         |      |          |          |
|---------|------|----------|----------|
| Iraq    | 2011 | 0.886643 | 0.769248 |
| Iraq    | 2012 | 0.873397 | 0.75733  |
| Iraq    | 2013 | 0.859141 | 0.744408 |
| Iraq    | 2014 | 0.849341 | 0.734867 |
| Iraq    | 2015 | 0.848791 | 0.733316 |
| Iraq    | 2016 | 0.849734 | 0.733889 |
| Iraq    | 2017 | 0.850296 | 0.733783 |
| Iraq    | 2018 | 0.838897 | 0.725088 |
| Iraq    | 2019 | 0.823535 | 0.707666 |
| Ireland | 1990 | 0.990332 | 0.642532 |
| Ireland | 1991 | 1.01067  | 0.652745 |
| Ireland | 1992 | 1.005023 | 0.645801 |
| Ireland | 1993 | 0.997892 | 0.639265 |
| Ireland | 1994 | 1.016307 | 0.644885 |
| Ireland | 1995 | 1.014649 | 0.636152 |
| Ireland | 1996 | 1.000293 | 0.620096 |
| Ireland | 1997 | 1.020021 | 0.631417 |
| Ireland | 1998 | 1.031917 | 0.637105 |
| Ireland | 1999 | 1.024805 | 0.629057 |
| Ireland | 2000 | 1.008419 | 0.613226 |
| Ireland | 2001 | 1.019148 | 0.611967 |
| Ireland | 2002 | 1.021805 | 0.615345 |
| Ireland | 2003 | 1.021697 | 0.61487  |
| Ireland | 2004 | 1.005065 | 0.60004  |
| Ireland | 2005 | 1.045104 | 0.620705 |

|         |      |          |          |
|---------|------|----------|----------|
| Ireland | 2006 | 1.067788 | 0.636154 |
| Ireland | 2007 | 1.052256 | 0.630424 |
| Ireland | 2008 | 1.038694 | 0.625566 |
| Ireland | 2009 | 1.017066 | 0.619329 |
| Ireland | 2010 | 1.018538 | 0.623428 |
| Ireland | 2011 | 1.012795 | 0.627264 |
| Ireland | 2012 | 0.975791 | 0.606707 |
| Ireland | 2013 | 0.943072 | 0.590724 |
| Ireland | 2014 | 0.941779 | 0.595064 |
| Ireland | 2015 | 0.952201 | 0.609346 |
| Ireland | 2016 | 0.942132 | 0.61169  |
| Ireland | 2017 | 0.933334 | 0.615757 |
| Ireland | 2018 | 0.93453  | 0.626241 |
| Ireland | 2019 | 0.920745 | 0.626484 |
| Israel  | 1990 | 0.94219  | 0.786904 |
| Israel  | 1991 | 0.919965 | 0.762573 |
| Israel  | 1992 | 0.917957 | 0.753597 |
| Israel  | 1993 | 0.919162 | 0.74611  |
| Israel  | 1994 | 0.919964 | 0.740401 |
| Israel  | 1995 | 0.89525  | 0.714392 |
| Israel  | 1996 | 0.885476 | 0.706356 |
| Israel  | 1997 | 0.869098 | 0.688093 |
| Israel  | 1998 | 0.857361 | 0.667378 |
| Israel  | 1999 | 0.855316 | 0.658138 |
| Israel  | 2000 | 0.841052 | 0.644188 |

|        |      |          |          |
|--------|------|----------|----------|
| Israel | 2001 | 0.848966 | 0.6474   |
| Israel | 2002 | 0.849254 | 0.644365 |
| Israel | 2003 | 0.849257 | 0.639475 |
| Israel | 2004 | 0.858922 | 0.643102 |
| Israel | 2005 | 0.861348 | 0.642839 |
| Israel | 2006 | 0.870257 | 0.648499 |
| Israel | 2007 | 0.877613 | 0.649739 |
| Israel | 2008 | 0.887024 | 0.649546 |
| Israel | 2009 | 0.903354 | 0.655117 |
| Israel | 2010 | 0.894466 | 0.645255 |
| Israel | 2011 | 0.916316 | 0.659221 |
| Israel | 2012 | 0.908112 | 0.649691 |
| Israel | 2013 | 0.919164 | 0.653967 |
| Israel | 2014 | 0.917547 | 0.649284 |
| Israel | 2015 | 0.902198 | 0.636174 |
| Israel | 2016 | 0.931438 | 0.657062 |
| Israel | 2017 | 0.929475 | 0.656012 |
| Israel | 2018 | 0.923335 | 0.653248 |
| Israel | 2019 | 0.923192 | 0.655589 |
| Italy  | 1990 | 1.090376 | 0.643927 |
| Italy  | 1991 | 1.081423 | 0.637552 |
| Italy  | 1992 | 1.078447 | 0.634752 |
| Italy  | 1993 | 1.088728 | 0.638461 |
| Italy  | 1994 | 1.092486 | 0.639173 |
| Italy  | 1995 | 1.104435 | 0.642915 |



|         |      |          |          |
|---------|------|----------|----------|
| Italy   | 1996 | 1.115154 | 0.644873 |
| Italy   | 1997 | 1.121742 | 0.644068 |
| Italy   | 1998 | 1.130953 | 0.645348 |
| Italy   | 1999 | 1.141682 | 0.646889 |
| Italy   | 2000 | 1.166232 | 0.654341 |
| Italy   | 2001 | 1.182466 | 0.657137 |
| Italy   | 2002 | 1.207321 | 0.66463  |
| Italy   | 2003 | 1.209099 | 0.6605   |
| Italy   | 2004 | 1.216337 | 0.660522 |
| Italy   | 2005 | 1.211844 | 0.651899 |
| Italy   | 2006 | 1.208596 | 0.644847 |
| Italy   | 2007 | 1.210034 | 0.642825 |
| Italy   | 2008 | 1.223902 | 0.648972 |
| Italy   | 2009 | 1.227047 | 0.651423 |
| Italy   | 2010 | 1.241487 | 0.658229 |
| Italy   | 2011 | 1.256087 | 0.66503  |
| Italy   | 2012 | 1.269111 | 0.672045 |
| Italy   | 2013 | 1.262556 | 0.669897 |
| Italy   | 2014 | 1.259651 | 0.670649 |
| Italy   | 2015 | 1.248791 | 0.665998 |
| Italy   | 2016 | 1.241213 | 0.662825 |
| Italy   | 2017 | 1.220767 | 0.657356 |
| Italy   | 2018 | 1.222834 | 0.665099 |
| Italy   | 2019 | 1.210609 | 0.666333 |
| Jamaica | 1990 | 0.636078 | 0.518682 |

|         |      |          |          |
|---------|------|----------|----------|
| Jamaica | 1991 | 0.692646 | 0.56671  |
| Jamaica | 1992 | 0.687608 | 0.56459  |
| Jamaica | 1993 | 0.690036 | 0.566605 |
| Jamaica | 1994 | 0.708948 | 0.583474 |
| Jamaica | 1995 | 0.731778 | 0.602656 |
| Jamaica | 1996 | 0.755209 | 0.621615 |
| Jamaica | 1997 | 0.780986 | 0.641921 |
| Jamaica | 1998 | 0.780952 | 0.642028 |
| Jamaica | 1999 | 0.813121 | 0.665991 |
| Jamaica | 2000 | 0.899106 | 0.732146 |
| Jamaica | 2001 | 0.899379 | 0.732191 |
| Jamaica | 2002 | 0.891943 | 0.735452 |
| Jamaica | 2003 | 0.881381 | 0.726775 |
| Jamaica | 2004 | 0.900935 | 0.744511 |
| Jamaica | 2005 | 0.913895 | 0.76107  |
| Jamaica | 2006 | 0.88166  | 0.736568 |
| Jamaica | 2007 | 0.74946  | 0.632214 |
| Jamaica | 2008 | 0.637378 | 0.539676 |
| Jamaica | 2009 | 0.588224 | 0.494132 |
| Jamaica | 2010 | 0.715381 | 0.601316 |
| Jamaica | 2011 | 0.647498 | 0.544749 |
| Jamaica | 2012 | 0.7813   | 0.660719 |
| Jamaica | 2013 | 0.79124  | 0.671617 |
| Jamaica | 2014 | 0.762489 | 0.646836 |
| Jamaica | 2015 | 0.756701 | 0.64138  |

|         |      |          |          |
|---------|------|----------|----------|
| Jamaica | 2016 | 0.739837 | 0.632018 |
| Jamaica | 2017 | 0.737952 | 0.631909 |
| Jamaica | 2018 | 0.739624 | 0.63439  |
| Jamaica | 2019 | 0.76193  | 0.654431 |
| Japan   | 1990 | 1.071062 | 0.680444 |
| Japan   | 1991 | 1.070475 | 0.67287  |
| Japan   | 1992 | 1.076246 | 0.669168 |
| Japan   | 1993 | 1.085941 | 0.668386 |
| Japan   | 1994 | 1.096482 | 0.668363 |
| Japan   | 1995 | 1.098415 | 0.665185 |
| Japan   | 1996 | 1.116045 | 0.671318 |
| Japan   | 1997 | 1.116951 | 0.666228 |
| Japan   | 1998 | 1.100232 | 0.650244 |
| Japan   | 1999 | 1.085048 | 0.634718 |
| Japan   | 2000 | 1.077853 | 0.623941 |
| Japan   | 2001 | 1.078097 | 0.617512 |
| Japan   | 2002 | 1.081282 | 0.611892 |
| Japan   | 2003 | 1.076595 | 0.602602 |
| Japan   | 2004 | 1.086712 | 0.601979 |
| Japan   | 2005 | 1.079257 | 0.590908 |
| Japan   | 2006 | 1.089796 | 0.590608 |
| Japan   | 2007 | 1.081004 | 0.581309 |
| Japan   | 2008 | 1.068997 | 0.570964 |
| Japan   | 2009 | 1.047886 | 0.557176 |
| Japan   | 2010 | 1.039781 | 0.550218 |

|        |      |          |          |
|--------|------|----------|----------|
| Japan  | 2011 | 1.059746 | 0.558397 |
| Japan  | 2012 | 1.071226 | 0.562936 |
| Japan  | 2013 | 1.081946 | 0.568402 |
| Japan  | 2014 | 1.09023  | 0.573894 |
| Japan  | 2015 | 1.09495  | 0.573838 |
| Japan  | 2016 | 1.105279 | 0.578573 |
| Japan  | 2017 | 1.106388 | 0.579657 |
| Japan  | 2018 | 1.120202 | 0.588741 |
| Japan  | 2019 | 1.123565 | 0.592949 |
| Jordan | 1990 | 1.243774 | 1.278353 |
| Jordan | 1991 | 1.271979 | 1.323684 |
| Jordan | 1992 | 1.212918 | 1.282366 |
| Jordan | 1993 | 1.233106 | 1.313997 |
| Jordan | 1994 | 1.211054 | 1.303852 |
| Jordan | 1995 | 1.231809 | 1.332617 |
| Jordan | 1996 | 1.284041 | 1.392659 |
| Jordan | 1997 | 1.287126 | 1.406764 |
| Jordan | 1998 | 1.308754 | 1.439609 |
| Jordan | 1999 | 1.333204 | 1.476799 |
| Jordan | 2000 | 1.358915 | 1.522114 |
| Jordan | 2001 | 1.404458 | 1.596437 |
| Jordan | 2002 | 1.427616 | 1.644192 |
| Jordan | 2003 | 1.421953 | 1.638204 |
| Jordan | 2004 | 1.479769 | 1.729284 |
| Jordan | 2005 | 1.497596 | 1.826894 |

|            |      |          |          |
|------------|------|----------|----------|
| Jordan     | 2006 | 1.443136 | 1.794166 |
| Jordan     | 2007 | 1.234151 | 1.483146 |
| Jordan     | 2008 | 1.106929 | 1.285829 |
| Jordan     | 2009 | 1.019138 | 1.165059 |
| Jordan     | 2010 | 0.948687 | 1.067889 |
| Jordan     | 2011 | 0.940285 | 1.066222 |
| Jordan     | 2012 | 0.951527 | 1.102951 |
| Jordan     | 2013 | 0.966647 | 1.159036 |
| Jordan     | 2014 | 0.973437 | 1.182669 |
| Jordan     | 2015 | 0.936691 | 1.117044 |
| Jordan     | 2016 | 0.952236 | 1.138096 |
| Jordan     | 2017 | 0.970198 | 1.166857 |
| Jordan     | 2018 | 0.973143 | 1.154724 |
| Jordan     | 2019 | 0.982615 | 1.164998 |
| Kazakhstan | 1990 | 0.999933 | 0.671258 |
| Kazakhstan | 1991 | 0.981541 | 0.660741 |
| Kazakhstan | 1992 | 0.97938  | 0.666346 |
| Kazakhstan | 1993 | 0.981365 | 0.670065 |
| Kazakhstan | 1994 | 0.974429 | 0.669119 |
| Kazakhstan | 1995 | 0.950401 | 0.661327 |
| Kazakhstan | 1996 | 0.930785 | 0.656143 |
| Kazakhstan | 1997 | 0.943874 | 0.664252 |
| Kazakhstan | 1998 | 0.935451 | 0.657537 |
| Kazakhstan | 1999 | 0.926939 | 0.650073 |
| Kazakhstan | 2000 | 0.886229 | 0.629965 |

|            |      |          |          |
|------------|------|----------|----------|
| Kazakhstan | 2001 | 0.881548 | 0.629943 |
| Kazakhstan | 2002 | 0.869182 | 0.618695 |
| Kazakhstan | 2003 | 0.840973 | 0.59763  |
| Kazakhstan | 2004 | 0.821565 | 0.586984 |
| Kazakhstan | 2005 | 0.821461 | 0.589292 |
| Kazakhstan | 2006 | 0.811659 | 0.58123  |
| Kazakhstan | 2007 | 0.818429 | 0.578066 |
| Kazakhstan | 2008 | 0.839521 | 0.583216 |
| Kazakhstan | 2009 | 0.85267  | 0.585487 |
| Kazakhstan | 2010 | 0.851782 | 0.57773  |
| Kazakhstan | 2011 | 0.848325 | 0.564973 |
| Kazakhstan | 2012 | 0.849505 | 0.555703 |
| Kazakhstan | 2013 | 0.851565 | 0.5504   |
| Kazakhstan | 2014 | 0.822531 | 0.523314 |
| Kazakhstan | 2015 | 0.844378 | 0.529259 |
| Kazakhstan | 2016 | 0.839327 | 0.522411 |
| Kazakhstan | 2017 | 0.844597 | 0.520727 |
| Kazakhstan | 2018 | 0.828471 | 0.515002 |
| Kazakhstan | 2019 | 0.852281 | 0.536614 |
| Kenya      | 1990 | 0.707017 | 0.669507 |
| Kenya      | 1991 | 0.695049 | 0.65375  |
| Kenya      | 1992 | 0.684015 | 0.637947 |
| Kenya      | 1993 | 0.671695 | 0.620169 |
| Kenya      | 1994 | 0.665955 | 0.607842 |
| Kenya      | 1995 | 0.656889 | 0.59345  |

|          |      |          |          |
|----------|------|----------|----------|
| Kenya    | 1996 | 0.646414 | 0.578509 |
| Kenya    | 1997 | 0.645358 | 0.571636 |
| Kenya    | 1998 | 0.63756  | 0.559602 |
| Kenya    | 1999 | 0.632168 | 0.549598 |
| Kenya    | 2000 | 0.629263 | 0.542961 |
| Kenya    | 2001 | 0.63245  | 0.542569 |
| Kenya    | 2002 | 0.638176 | 0.545642 |
| Kenya    | 2003 | 0.642005 | 0.548332 |
| Kenya    | 2004 | 0.640791 | 0.547412 |
| Kenya    | 2005 | 0.640905 | 0.546741 |
| Kenya    | 2006 | 0.638279 | 0.544025 |
| Kenya    | 2007 | 0.639843 | 0.544383 |
| Kenya    | 2008 | 0.641193 | 0.544797 |
| Kenya    | 2009 | 0.64706  | 0.549628 |
| Kenya    | 2010 | 0.662556 | 0.562322 |
| Kenya    | 2011 | 0.682387 | 0.578683 |
| Kenya    | 2012 | 0.703185 | 0.596299 |
| Kenya    | 2013 | 0.725656 | 0.615121 |
| Kenya    | 2014 | 0.743482 | 0.63115  |
| Kenya    | 2015 | 0.759326 | 0.646749 |
| Kenya    | 2016 | 0.766795 | 0.655746 |
| Kenya    | 2017 | 0.775255 | 0.665895 |
| Kenya    | 2018 | 0.781453 | 0.675112 |
| Kenya    | 2019 | 0.784901 | 0.682011 |
| Kiribati | 1990 | 1.4921   | 1.196769 |

|          |      |          |          |
|----------|------|----------|----------|
| Kiribati | 1991 | 1.456679 | 1.172151 |
| Kiribati | 1992 | 1.426989 | 1.152817 |
| Kiribati | 1993 | 1.399922 | 1.134295 |
| Kiribati | 1994 | 1.379383 | 1.119111 |
| Kiribati | 1995 | 1.357045 | 1.1003   |
| Kiribati | 1996 | 1.342688 | 1.088594 |
| Kiribati | 1997 | 1.337935 | 1.081264 |
| Kiribati | 1998 | 1.335628 | 1.075184 |
| Kiribati | 1999 | 1.338924 | 1.073275 |
| Kiribati | 2000 | 1.334341 | 1.064826 |
| Kiribati | 2001 | 1.330727 | 1.059429 |
| Kiribati | 2002 | 1.334753 | 1.061153 |
| Kiribati | 2003 | 1.344028 | 1.068185 |
| Kiribati | 2004 | 1.360788 | 1.08068  |
| Kiribati | 2005 | 1.358904 | 1.078589 |
| Kiribati | 2006 | 1.337353 | 1.06056  |
| Kiribati | 2007 | 1.308545 | 1.039539 |
| Kiribati | 2008 | 1.284763 | 1.019264 |
| Kiribati | 2009 | 1.261421 | 0.998717 |
| Kiribati | 2010 | 1.244095 | 0.982611 |
| Kiribati | 2011 | 1.224451 | 0.964273 |
| Kiribati | 2012 | 1.203869 | 0.946504 |
| Kiribati | 2013 | 1.187289 | 0.931639 |
| Kiribati | 2014 | 1.173134 | 0.918956 |
| Kiribati | 2015 | 1.174871 | 0.919107 |



|          |      |          |          |
|----------|------|----------|----------|
| Kiribati | 2016 | 1.184607 | 0.925399 |
| Kiribati | 2017 | 1.193378 | 0.931678 |
| Kiribati | 2018 | 1.19579  | 0.933418 |
| Kiribati | 2019 | 1.197517 | 0.934093 |
| Kuwait   | 1990 | 0.906022 | 1.255995 |
| Kuwait   | 1991 | 0.892059 | 1.282196 |
| Kuwait   | 1992 | 0.885625 | 1.259416 |
| Kuwait   | 1993 | 0.768031 | 1.079664 |
| Kuwait   | 1994 | 0.721014 | 1.029666 |
| Kuwait   | 1995 | 0.703499 | 1.018502 |
| Kuwait   | 1996 | 0.72527  | 1.063488 |
| Kuwait   | 1997 | 0.668915 | 1.014207 |
| Kuwait   | 1998 | 0.704428 | 1.07427  |
| Kuwait   | 1999 | 0.635082 | 0.968802 |
| Kuwait   | 2000 | 0.636471 | 0.973544 |
| Kuwait   | 2001 | 0.77434  | 1.188986 |
| Kuwait   | 2002 | 0.694942 | 1.096564 |
| Kuwait   | 2003 | 0.673842 | 1.081392 |
| Kuwait   | 2004 | 0.653702 | 1.044354 |
| Kuwait   | 2005 | 0.61209  | 0.973403 |
| Kuwait   | 2006 | 0.597222 | 0.957241 |
| Kuwait   | 2007 | 0.649274 | 1.040845 |
| Kuwait   | 2008 | 0.671105 | 1.096313 |
| Kuwait   | 2009 | 0.757462 | 1.216108 |
| Kuwait   | 2010 | 0.839781 | 1.32464  |

|            |      |          |          |
|------------|------|----------|----------|
| Kuwait     | 2011 | 0.862705 | 1.35794  |
| Kuwait     | 2012 | 0.814298 | 1.283671 |
| Kuwait     | 2013 | 0.814568 | 1.285124 |
| Kuwait     | 2014 | 0.84126  | 1.300564 |
| Kuwait     | 2015 | 0.767129 | 1.168468 |
| Kuwait     | 2016 | 0.739668 | 1.118587 |
| Kuwait     | 2017 | 0.726698 | 1.081906 |
| Kuwait     | 2018 | 0.713715 | 1.056145 |
| Kuwait     | 2019 | 0.723676 | 1.037296 |
| Kyrgyzstan | 1990 | 0.891951 | 0.672838 |
| Kyrgyzstan | 1991 | 0.908612 | 0.691176 |
| Kyrgyzstan | 1992 | 0.898784 | 0.681623 |
| Kyrgyzstan | 1993 | 0.850417 | 0.650437 |
| Kyrgyzstan | 1994 | 0.82783  | 0.639884 |
| Kyrgyzstan | 1995 | 0.837243 | 0.653969 |
| Kyrgyzstan | 1996 | 0.834809 | 0.650548 |
| Kyrgyzstan | 1997 | 0.819205 | 0.637971 |
| Kyrgyzstan | 1998 | 0.831842 | 0.648076 |
| Kyrgyzstan | 1999 | 0.840267 | 0.664432 |
| Kyrgyzstan | 2000 | 0.844168 | 0.661815 |
| Kyrgyzstan | 2001 | 0.830856 | 0.658922 |
| Kyrgyzstan | 2002 | 0.828249 | 0.667975 |
| Kyrgyzstan | 2003 | 0.824127 | 0.67254  |
| Kyrgyzstan | 2004 | 0.810225 | 0.669459 |
| Kyrgyzstan | 2005 | 0.806345 | 0.668711 |

|                                  |      |          |          |
|----------------------------------|------|----------|----------|
| Kyrgyzstan                       | 2006 | 0.770748 | 0.64556  |
| Kyrgyzstan                       | 2007 | 0.755731 | 0.63405  |
| Kyrgyzstan                       | 2008 | 0.784272 | 0.65742  |
| Kyrgyzstan                       | 2009 | 0.81073  | 0.67425  |
| Kyrgyzstan                       | 2010 | 0.817755 | 0.685054 |
| Kyrgyzstan                       | 2011 | 0.840219 | 0.711408 |
| Kyrgyzstan                       | 2012 | 0.841235 | 0.716805 |
| Kyrgyzstan                       | 2013 | 0.84349  | 0.720402 |
| Kyrgyzstan                       | 2014 | 0.842241 | 0.705299 |
| Kyrgyzstan                       | 2015 | 0.860066 | 0.70151  |
| Kyrgyzstan                       | 2016 | 0.874609 | 0.704633 |
| Kyrgyzstan                       | 2017 | 0.849871 | 0.684358 |
| Kyrgyzstan                       | 2018 | 0.841746 | 0.687493 |
| Kyrgyzstan                       | 2019 | 0.83568  | 0.684807 |
| Lao People's Democratic Republic | 1990 | 1.080257 | 0.904518 |
| Lao People's Democratic Republic | 1991 | 1.079338 | 0.906014 |
| Lao People's Democratic Republic | 1992 | 1.08287  | 0.911731 |
| Lao People's Democratic Republic | 1993 | 1.084715 | 0.916095 |
| Lao People's Democratic Republic | 1994 | 1.087379 | 0.920926 |
| Lao People's Democratic Republic | 1995 | 1.087375 | 0.922831 |
| Lao People's Democratic Republic | 1996 | 1.079552 | 0.918976 |
| Lao People's Democratic Republic | 1997 | 1.072371 | 0.91556  |
| Lao People's Democratic Republic | 1998 | 1.058718 | 0.906658 |
| Lao People's Democratic Republic | 1999 | 1.052176 | 0.902857 |
| Lao People's Democratic Republic | 2000 | 1.036378 | 0.890862 |

|                                  |      |          |          |
|----------------------------------|------|----------|----------|
| Lao People's Democratic Republic | 2001 | 1.02433  | 0.883273 |
| Lao People's Democratic Republic | 2002 | 1.015382 | 0.87784  |
| Lao People's Democratic Republic | 2003 | 1.002093 | 0.869322 |
| Lao People's Democratic Republic | 2004 | 0.99141  | 0.862162 |
| Lao People's Democratic Republic | 2005 | 0.983924 | 0.856121 |
| Lao People's Democratic Republic | 2006 | 0.974171 | 0.850443 |
| Lao People's Democratic Republic | 2007 | 0.969745 | 0.848823 |
| Lao People's Democratic Republic | 2008 | 0.968779 | 0.849477 |
| Lao People's Democratic Republic | 2009 | 0.964921 | 0.846846 |
| Lao People's Democratic Republic | 2010 | 0.962207 | 0.843804 |
| Lao People's Democratic Republic | 2011 | 0.957551 | 0.841215 |
| Lao People's Democratic Republic | 2012 | 0.951021 | 0.838007 |
| Lao People's Democratic Republic | 2013 | 0.947474 | 0.837311 |
| Lao People's Democratic Republic | 2014 | 0.942958 | 0.835606 |
| Lao People's Democratic Republic | 2015 | 0.939503 | 0.833335 |
| Lao People's Democratic Republic | 2016 | 0.936031 | 0.833099 |
| Lao People's Democratic Republic | 2017 | 0.933775 | 0.833237 |
| Lao People's Democratic Republic | 2018 | 0.929921 | 0.831474 |
| Lao People's Democratic Republic | 2019 | 0.927608 | 0.831059 |
| Latvia                           | 1990 | 1.205006 | 0.533461 |
| Latvia                           | 1991 | 1.183017 | 0.522451 |
| Latvia                           | 1992 | 1.1596   | 0.513471 |
| Latvia                           | 1993 | 1.091711 | 0.49012  |
| Latvia                           | 1994 | 1.035137 | 0.470417 |
| Latvia                           | 1995 | 1.061499 | 0.481214 |

|         |      |          |          |
|---------|------|----------|----------|
| Latvia  | 1996 | 1.062243 | 0.487466 |
| Latvia  | 1997 | 1.055513 | 0.488382 |
| Latvia  | 1998 | 1.044571 | 0.489392 |
| Latvia  | 1999 | 1.049745 | 0.491657 |
| Latvia  | 2000 | 1.060367 | 0.490885 |
| Latvia  | 2001 | 1.058915 | 0.492391 |
| Latvia  | 2002 | 1.072686 | 0.496717 |
| Latvia  | 2003 | 1.191884 | 0.544692 |
| Latvia  | 2004 | 1.183538 | 0.544267 |
| Latvia  | 2005 | 1.135283 | 0.525288 |
| Latvia  | 2006 | 1.180254 | 0.548254 |
| Latvia  | 2007 | 1.191916 | 0.549398 |
| Latvia  | 2008 | 1.338475 | 0.604078 |
| Latvia  | 2009 | 1.473186 | 0.665503 |
| Latvia  | 2010 | 1.605934 | 0.719695 |
| Latvia  | 2011 | 1.734377 | 0.76653  |
| Latvia  | 2012 | 1.736977 | 0.761187 |
| Latvia  | 2013 | 1.795712 | 0.787659 |
| Latvia  | 2014 | 1.727391 | 0.755626 |
| Latvia  | 2015 | 1.815508 | 0.792721 |
| Latvia  | 2016 | 1.870149 | 0.814017 |
| Latvia  | 2017 | 1.84377  | 0.808288 |
| Latvia  | 2018 | 1.800032 | 0.794765 |
| Latvia  | 2019 | 1.764838 | 0.785235 |
| Lebanon | 1990 | 1.071467 | 0.981764 |

|         |      |          |          |
|---------|------|----------|----------|
| Lebanon | 1991 | 1.096284 | 1.005245 |
| Lebanon | 1992 | 1.107116 | 1.018167 |
| Lebanon | 1993 | 1.116366 | 1.030655 |
| Lebanon | 1994 | 1.123867 | 1.0433   |
| Lebanon | 1995 | 1.145438 | 1.068906 |
| Lebanon | 1996 | 1.152793 | 1.082827 |
| Lebanon | 1997 | 1.150313 | 1.087767 |
| Lebanon | 1998 | 1.160116 | 1.103824 |
| Lebanon | 1999 | 1.142017 | 1.095643 |
| Lebanon | 2000 | 1.136071 | 1.09651  |
| Lebanon | 2001 | 1.119939 | 1.087568 |
| Lebanon | 2002 | 1.108308 | 1.081466 |
| Lebanon | 2003 | 1.095733 | 1.073018 |
| Lebanon | 2004 | 1.071111 | 1.051902 |
| Lebanon | 2005 | 1.050357 | 1.031778 |
| Lebanon | 2006 | 1.030823 | 1.01005  |
| Lebanon | 2007 | 1.013675 | 0.987874 |
| Lebanon | 2008 | 1.001423 | 0.968311 |
| Lebanon | 2009 | 1.001269 | 0.95813  |
| Lebanon | 2010 | 1.011659 | 0.956166 |
| Lebanon | 2011 | 1.014475 | 0.945418 |
| Lebanon | 2012 | 1.01685  | 0.933202 |
| Lebanon | 2013 | 1.030695 | 0.93028  |
| Lebanon | 2014 | 1.053575 | 0.933731 |
| Lebanon | 2015 | 1.083446 | 0.942194 |

|         |      |          |          |
|---------|------|----------|----------|
| Lebanon | 2016 | 1.11331  | 0.94979  |
| Lebanon | 2017 | 1.146106 | 0.959078 |
| Lebanon | 2018 | 1.180669 | 0.969818 |
| Lebanon | 2019 | 1.214408 | 0.980276 |
| Lesotho | 1990 | 0.547406 | 0.365938 |
| Lesotho | 1991 | 0.542313 | 0.361697 |
| Lesotho | 1992 | 0.533141 | 0.355213 |
| Lesotho | 1993 | 0.52431  | 0.348481 |
| Lesotho | 1994 | 0.507527 | 0.337316 |
| Lesotho | 1995 | 0.487595 | 0.323129 |
| Lesotho | 1996 | 0.460489 | 0.303582 |
| Lesotho | 1997 | 0.433845 | 0.283866 |
| Lesotho | 1998 | 0.4568   | 0.296374 |
| Lesotho | 1999 | 0.483221 | 0.311493 |
| Lesotho | 2000 | 0.541543 | 0.347625 |
| Lesotho | 2001 | 0.554774 | 0.355842 |
| Lesotho | 2002 | 0.580648 | 0.372819 |
| Lesotho | 2003 | 0.628877 | 0.403491 |
| Lesotho | 2004 | 0.639428 | 0.412443 |
| Lesotho | 2005 | 0.656144 | 0.4243   |
| Lesotho | 2006 | 0.657785 | 0.427168 |
| Lesotho | 2007 | 0.674236 | 0.438252 |
| Lesotho | 2008 | 0.701223 | 0.456121 |
| Lesotho | 2009 | 0.707365 | 0.462249 |
| Lesotho | 2010 | 0.71764  | 0.471142 |

|         |      |          |          |
|---------|------|----------|----------|
| Lesotho | 2011 | 0.721541 | 0.476297 |
| Lesotho | 2012 | 0.738423 | 0.489759 |
| Lesotho | 2013 | 0.742987 | 0.495743 |
| Lesotho | 2014 | 0.740565 | 0.497532 |
| Lesotho | 2015 | 0.735094 | 0.496563 |
| Lesotho | 2016 | 0.722892 | 0.490841 |
| Lesotho | 2017 | 0.711107 | 0.4857   |
| Lesotho | 2018 | 0.705235 | 0.48378  |
| Lesotho | 2019 | 0.705917 | 0.485671 |
| Liberia | 1990 | 0.9085   | 0.996005 |
| Liberia | 1991 | 0.911296 | 0.998861 |
| Liberia | 1992 | 0.925106 | 1.011605 |
| Liberia | 1993 | 0.924282 | 1.008222 |
| Liberia | 1994 | 0.917343 | 0.998056 |
| Liberia | 1995 | 0.913325 | 0.981736 |
| Liberia | 1996 | 0.878938 | 0.937608 |
| Liberia | 1997 | 0.869847 | 0.918023 |
| Liberia | 1998 | 0.850108 | 0.894908 |
| Liberia | 1999 | 0.838556 | 0.881561 |
| Liberia | 2000 | 0.849539 | 0.884162 |
| Liberia | 2001 | 0.86329  | 0.889863 |
| Liberia | 2002 | 0.885972 | 0.907093 |
| Liberia | 2003 | 0.88833  | 0.908553 |
| Liberia | 2004 | 0.899159 | 0.919208 |
| Liberia | 2005 | 0.912469 | 0.924308 |



|         |      |          |          |
|---------|------|----------|----------|
| Liberia | 2006 | 0.92007  | 0.923942 |
| Liberia | 2007 | 0.924098 | 0.921404 |
| Liberia | 2008 | 0.926949 | 0.929499 |
| Liberia | 2009 | 0.922828 | 0.930079 |
| Liberia | 2010 | 0.930016 | 0.935905 |
| Liberia | 2011 | 0.941819 | 0.945008 |
| Liberia | 2012 | 0.942946 | 0.943157 |
| Liberia | 2013 | 0.938623 | 0.938907 |
| Liberia | 2014 | 0.940143 | 0.942135 |
| Liberia | 2015 | 0.942099 | 0.941489 |
| Liberia | 2016 | 0.950782 | 0.94713  |
| Liberia | 2017 | 0.957875 | 0.950271 |
| Liberia | 2018 | 0.960514 | 0.9517   |
| Liberia | 2019 | 0.96058  | 0.953451 |
| Libya   | 1990 | 1.055999 | 1.102401 |
| Libya   | 1991 | 1.061455 | 1.107185 |
| Libya   | 1992 | 1.031746 | 1.074807 |
| Libya   | 1993 | 1.021858 | 1.061961 |
| Libya   | 1994 | 1.014832 | 1.051481 |
| Libya   | 1995 | 1.008831 | 1.042201 |
| Libya   | 1996 | 1.016403 | 1.048683 |
| Libya   | 1997 | 1.000094 | 1.031347 |
| Libya   | 1998 | 0.991815 | 1.025339 |
| Libya   | 1999 | 0.982479 | 1.020405 |
| Libya   | 2000 | 0.97538  | 1.013309 |

|           |      |          |          |
|-----------|------|----------|----------|
| Libya     | 2001 | 0.934374 | 0.965433 |
| Libya     | 2002 | 0.904144 | 0.92635  |
| Libya     | 2003 | 0.899903 | 0.916303 |
| Libya     | 2004 | 0.962226 | 0.97716  |
| Libya     | 2005 | 1.003809 | 1.021942 |
| Libya     | 2006 | 1.022    | 1.036288 |
| Libya     | 2007 | 1.116889 | 1.122346 |
| Libya     | 2008 | 1.143164 | 1.149181 |
| Libya     | 2009 | 1.226991 | 1.228515 |
| Libya     | 2010 | 1.20636  | 1.206442 |
| Libya     | 2011 | 1.189759 | 1.190245 |
| Libya     | 2012 | 1.216209 | 1.220529 |
| Libya     | 2013 | 1.219613 | 1.224468 |
| Libya     | 2014 | 1.214545 | 1.220811 |
| Libya     | 2015 | 1.225026 | 1.231131 |
| Libya     | 2016 | 1.228146 | 1.234103 |
| Libya     | 2017 | 1.223734 | 1.228194 |
| Libya     | 2018 | 1.220224 | 1.223662 |
| Libya     | 2019 | 1.214728 | 1.216594 |
| Lithuania | 1990 | 0.971313 | 0.540179 |
| Lithuania | 1991 | 0.985477 | 0.54626  |
| Lithuania | 1992 | 0.989442 | 0.546932 |
| Lithuania | 1993 | 0.949626 | 0.53415  |
| Lithuania | 1994 | 0.96797  | 0.550823 |
| Lithuania | 1995 | 1.00168  | 0.568811 |

|            |      |          |          |
|------------|------|----------|----------|
| Lithuania  | 1996 | 1.019597 | 0.571551 |
| Lithuania  | 1997 | 1.05621  | 0.584609 |
| Lithuania  | 1998 | 1.055637 | 0.581885 |
| Lithuania  | 1999 | 1.050745 | 0.578728 |
| Lithuania  | 2000 | 1.057401 | 0.578423 |
| Lithuania  | 2001 | 1.067042 | 0.580847 |
| Lithuania  | 2002 | 1.080398 | 0.579941 |
| Lithuania  | 2003 | 1.136544 | 0.606356 |
| Lithuania  | 2004 | 1.103524 | 0.587737 |
| Lithuania  | 2005 | 1.084225 | 0.579263 |
| Lithuania  | 2006 | 1.113196 | 0.594664 |
| Lithuania  | 2007 | 1.096276 | 0.583299 |
| Lithuania  | 2008 | 1.198771 | 0.624744 |
| Lithuania  | 2009 | 1.229255 | 0.622287 |
| Lithuania  | 2010 | 1.21543  | 0.605984 |
| Lithuania  | 2011 | 1.22594  | 0.611089 |
| Lithuania  | 2012 | 1.243841 | 0.615975 |
| Lithuania  | 2013 | 1.228526 | 0.60492  |
| Lithuania  | 2014 | 1.242323 | 0.608617 |
| Lithuania  | 2015 | 1.266152 | 0.620736 |
| Lithuania  | 2016 | 1.250372 | 0.614161 |
| Lithuania  | 2017 | 1.337779 | 0.654176 |
| Lithuania  | 2018 | 1.319187 | 0.645546 |
| Lithuania  | 2019 | 1.350657 | 0.661003 |
| Luxembourg | 1990 | 1.393482 | 0.713825 |

|            |      |          |          |
|------------|------|----------|----------|
| Luxembourg | 1991 | 1.405872 | 0.718466 |
| Luxembourg | 1992 | 1.45974  | 0.741392 |
| Luxembourg | 1993 | 1.457165 | 0.737255 |
| Luxembourg | 1994 | 1.465173 | 0.734587 |
| Luxembourg | 1995 | 1.498477 | 0.746412 |
| Luxembourg | 1996 | 1.532323 | 0.762892 |
| Luxembourg | 1997 | 1.541765 | 0.767401 |
| Luxembourg | 1998 | 1.53696  | 0.763833 |
| Luxembourg | 1999 | 1.557634 | 0.771755 |
| Luxembourg | 2000 | 1.583232 | 0.780806 |
| Luxembourg | 2001 | 1.629875 | 0.804553 |
| Luxembourg | 2002 | 1.58333  | 0.786575 |
| Luxembourg | 2003 | 1.541825 | 0.764156 |
| Luxembourg | 2004 | 1.542719 | 0.759595 |
| Luxembourg | 2005 | 1.564119 | 0.7683   |
| Luxembourg | 2006 | 1.568078 | 0.772499 |
| Luxembourg | 2007 | 1.574228 | 0.78169  |
| Luxembourg | 2008 | 1.559942 | 0.780138 |
| Luxembourg | 2009 | 1.486968 | 0.747579 |
| Luxembourg | 2010 | 1.461338 | 0.738203 |
| Luxembourg | 2011 | 1.483877 | 0.760491 |
| Luxembourg | 2012 | 1.434736 | 0.751165 |
| Luxembourg | 2013 | 1.437263 | 0.769188 |
| Luxembourg | 2014 | 1.436678 | 0.781738 |
| Luxembourg | 2015 | 1.449766 | 0.795169 |

|            |      |          |          |
|------------|------|----------|----------|
| Luxembourg | 2016 | 1.452105 | 0.803893 |
| Luxembourg | 2017 | 1.424215 | 0.802565 |
| Luxembourg | 2018 | 1.395836 | 0.799804 |
| Luxembourg | 2019 | 1.372174 | 0.796658 |
| Madagascar | 1990 | 0.654498 | 0.630902 |
| Madagascar | 1991 | 0.665058 | 0.636322 |
| Madagascar | 1992 | 0.679494 | 0.646495 |
| Madagascar | 1993 | 0.674667 | 0.639008 |
| Madagascar | 1994 | 0.673359 | 0.633825 |
| Madagascar | 1995 | 0.672929 | 0.631342 |
| Madagascar | 1996 | 0.669081 | 0.625767 |
| Madagascar | 1997 | 0.68748  | 0.638721 |
| Madagascar | 1998 | 0.690612 | 0.638743 |
| Madagascar | 1999 | 0.690685 | 0.635064 |
| Madagascar | 2000 | 0.704869 | 0.643978 |
| Madagascar | 2001 | 0.712433 | 0.64898  |
| Madagascar | 2002 | 0.730031 | 0.662803 |
| Madagascar | 2003 | 0.730674 | 0.662693 |
| Madagascar | 2004 | 0.739866 | 0.667256 |
| Madagascar | 2005 | 0.736319 | 0.660275 |
| Madagascar | 2006 | 0.730087 | 0.65173  |
| Madagascar | 2007 | 0.726425 | 0.64593  |
| Madagascar | 2008 | 0.72202  | 0.640593 |
| Madagascar | 2009 | 0.728877 | 0.645161 |
| Madagascar | 2010 | 0.734435 | 0.649298 |

|            |      |          |          |
|------------|------|----------|----------|
| Madagascar | 2011 | 0.741916 | 0.654738 |
| Madagascar | 2012 | 0.749575 | 0.661406 |
| Madagascar | 2013 | 0.756602 | 0.668668 |
| Madagascar | 2014 | 0.764441 | 0.6762   |
| Madagascar | 2015 | 0.770191 | 0.682863 |
| Madagascar | 2016 | 0.774117 | 0.690311 |
| Madagascar | 2017 | 0.779615 | 0.698152 |
| Madagascar | 2018 | 0.78173  | 0.702984 |
| Madagascar | 2019 | 0.783939 | 0.70848  |
| Malawi     | 1990 | 0.863324 | 0.714457 |
| Malawi     | 1991 | 0.838268 | 0.692198 |
| Malawi     | 1992 | 0.814011 | 0.670492 |
| Malawi     | 1993 | 0.796118 | 0.651846 |
| Malawi     | 1994 | 0.780322 | 0.635558 |
| Malawi     | 1995 | 0.762866 | 0.621129 |
| Malawi     | 1996 | 0.748306 | 0.610385 |
| Malawi     | 1997 | 0.734158 | 0.599556 |
| Malawi     | 1998 | 0.72624  | 0.593395 |
| Malawi     | 1999 | 0.724455 | 0.586929 |
| Malawi     | 2000 | 0.715552 | 0.575648 |
| Malawi     | 2001 | 0.705807 | 0.565471 |
| Malawi     | 2002 | 0.70057  | 0.558742 |
| Malawi     | 2003 | 0.700275 | 0.556185 |
| Malawi     | 2004 | 0.690505 | 0.54759  |
| Malawi     | 2005 | 0.684543 | 0.540365 |

|          |      |          |          |
|----------|------|----------|----------|
| Malawi   | 2006 | 0.682796 | 0.534722 |
| Malawi   | 2007 | 0.686828 | 0.535867 |
| Malawi   | 2008 | 0.697033 | 0.54052  |
| Malawi   | 2009 | 0.707276 | 0.54586  |
| Malawi   | 2010 | 0.71033  | 0.546968 |
| Malawi   | 2011 | 0.714983 | 0.54886  |
| Malawi   | 2012 | 0.724143 | 0.555918 |
| Malawi   | 2013 | 0.733413 | 0.563464 |
| Malawi   | 2014 | 0.737841 | 0.569168 |
| Malawi   | 2015 | 0.74575  | 0.576821 |
| Malawi   | 2016 | 0.748773 | 0.583159 |
| Malawi   | 2017 | 0.754559 | 0.591801 |
| Malawi   | 2018 | 0.760637 | 0.599123 |
| Malawi   | 2019 | 0.765263 | 0.605597 |
| Malaysia | 1990 | 0.819196 | 0.788761 |
| Malaysia | 1991 | 0.846018 | 0.816191 |
| Malaysia | 1992 | 0.886443 | 0.853191 |
| Malaysia | 1993 | 0.94471  | 0.913312 |
| Malaysia | 1994 | 0.975225 | 0.954186 |
| Malaysia | 1995 | 0.982179 | 0.948723 |
| Malaysia | 1996 | 0.950804 | 0.889981 |
| Malaysia | 1997 | 0.965724 | 0.902726 |
| Malaysia | 1998 | 1.026153 | 0.991537 |
| Malaysia | 1999 | 1.047448 | 1.026159 |
| Malaysia | 2000 | 1.034293 | 1.007025 |

|          |      |          |          |
|----------|------|----------|----------|
| Malaysia | 2001 | 1.027312 | 0.987668 |
| Malaysia | 2002 | 1.078764 | 1.04399  |
| Malaysia | 2003 | 1.063797 | 1.039922 |
| Malaysia | 2004 | 1.060262 | 1.061847 |
| Malaysia | 2005 | 1.066861 | 1.080876 |
| Malaysia | 2006 | 1.07099  | 1.094214 |
| Malaysia | 2007 | 1.072336 | 1.107498 |
| Malaysia | 2008 | 1.059789 | 1.110449 |
| Malaysia | 2009 | 1.063617 | 1.123318 |
| Malaysia | 2010 | 1.057671 | 1.11054  |
| Malaysia | 2011 | 1.04982  | 1.098519 |
| Malaysia | 2012 | 1.067402 | 1.137766 |
| Malaysia | 2013 | 1.064808 | 1.180301 |
| Malaysia | 2014 | 1.056546 | 1.179    |
| Malaysia | 2015 | 1.053687 | 1.173967 |
| Malaysia | 2016 | 1.045563 | 1.136786 |
| Malaysia | 2017 | 1.04171  | 1.122423 |
| Malaysia | 2018 | 1.044457 | 1.117039 |
| Malaysia | 2019 | 1.041762 | 1.08757  |
| Maldives | 1990 | 0.963518 | 1.206453 |
| Maldives | 1991 | 0.972691 | 1.238021 |
| Maldives | 1992 | 0.98505  | 1.276931 |
| Maldives | 1993 | 0.95509  | 1.239805 |
| Maldives | 1994 | 0.900192 | 1.140108 |
| Maldives | 1995 | 0.914347 | 1.166679 |



|          |      |          |          |
|----------|------|----------|----------|
| Maldives | 1996 | 0.962101 | 1.260357 |
| Maldives | 1997 | 0.99324  | 1.318302 |
| Maldives | 1998 | 0.950574 | 1.23224  |
| Maldives | 1999 | 0.950123 | 1.207546 |
| Maldives | 2000 | 0.963335 | 1.233702 |
| Maldives | 2001 | 0.952392 | 1.219721 |
| Maldives | 2002 | 0.85437  | 1.079451 |
| Maldives | 2003 | 0.855313 | 1.076779 |
| Maldives | 2004 | 0.863548 | 1.078919 |
| Maldives | 2005 | 0.867198 | 1.075533 |
| Maldives | 2006 | 0.878145 | 1.082157 |
| Maldives | 2007 | 0.896513 | 1.09889  |
| Maldives | 2008 | 0.915916 | 1.116226 |
| Maldives | 2009 | 0.944785 | 1.145004 |
| Maldives | 2010 | 0.961791 | 1.162282 |
| Maldives | 2011 | 0.957437 | 1.155309 |
| Maldives | 2012 | 0.951009 | 1.149364 |
| Maldives | 2013 | 0.938156 | 1.13562  |
| Maldives | 2014 | 0.919664 | 1.11528  |
| Maldives | 2015 | 0.897286 | 1.09207  |
| Maldives | 2016 | 0.902015 | 1.100388 |
| Maldives | 2017 | 0.903999 | 1.105606 |
| Maldives | 2018 | 0.905796 | 1.110964 |
| Maldives | 2019 | 0.90613  | 1.11559  |
| Mali     | 1990 | 1.052152 | 0.960348 |

|      |      |          |          |
|------|------|----------|----------|
| Mali | 1991 | 1.049099 | 0.963432 |
| Mali | 1992 | 1.04031  | 0.962519 |
| Mali | 1993 | 1.024426 | 0.95587  |
| Mali | 1994 | 1.014837 | 0.953214 |
| Mali | 1995 | 1.01442  | 0.958046 |
| Mali | 1996 | 1.009798 | 0.959951 |
| Mali | 1997 | 1.013619 | 0.970303 |
| Mali | 1998 | 1.006038 | 0.969867 |
| Mali | 1999 | 0.988446 | 0.959086 |
| Mali | 2000 | 0.979709 | 0.955419 |
| Mali | 2001 | 0.967442 | 0.950056 |
| Mali | 2002 | 0.956589 | 0.943906 |
| Mali | 2003 | 0.948678 | 0.941863 |
| Mali | 2004 | 0.931661 | 0.929066 |
| Mali | 2005 | 0.920049 | 0.920402 |
| Mali | 2006 | 0.912475 | 0.915756 |
| Mali | 2007 | 0.896128 | 0.902561 |
| Mali | 2008 | 0.880758 | 0.889383 |
| Mali | 2009 | 0.8671   | 0.8774   |
| Mali | 2010 | 0.862463 | 0.874125 |
| Mali | 2011 | 0.861756 | 0.875638 |
| Mali | 2012 | 0.860395 | 0.876241 |
| Mali | 2013 | 0.852067 | 0.868954 |
| Mali | 2014 | 0.849678 | 0.868136 |
| Mali | 2015 | 0.842445 | 0.862383 |

|       |      |          |          |
|-------|------|----------|----------|
| Mali  | 2016 | 0.832439 | 0.855942 |
| Mali  | 2017 | 0.822786 | 0.849405 |
| Mali  | 2018 | 0.827136 | 0.855255 |
| Mali  | 2019 | 0.830844 | 0.85997  |
| Malta | 1990 | 1.008276 | 0.651471 |
| Malta | 1991 | 1.030094 | 0.651632 |
| Malta | 1992 | 1.060652 | 0.662053 |
| Malta | 1993 | 1.091122 | 0.675794 |
| Malta | 1994 | 1.154814 | 0.722773 |
| Malta | 1995 | 1.172958 | 0.735947 |
| Malta | 1996 | 1.138106 | 0.716251 |
| Malta | 1997 | 1.119391 | 0.702479 |
| Malta | 1998 | 1.163283 | 0.728761 |
| Malta | 1999 | 1.16292  | 0.731829 |
| Malta | 2000 | 1.163634 | 0.732145 |
| Malta | 2001 | 1.136787 | 0.714885 |
| Malta | 2002 | 1.094725 | 0.687322 |
| Malta | 2003 | 1.085162 | 0.685129 |
| Malta | 2004 | 1.089569 | 0.692118 |
| Malta | 2005 | 1.035043 | 0.659262 |
| Malta | 2006 | 1.047596 | 0.668544 |
| Malta | 2007 | 1.038632 | 0.664038 |
| Malta | 2008 | 1.016727 | 0.651006 |
| Malta | 2009 | 1.034098 | 0.663307 |
| Malta | 2010 | 1.009965 | 0.647124 |

|                  |      |          |          |
|------------------|------|----------|----------|
| Malta            | 2011 | 1.002912 | 0.643467 |
| Malta            | 2012 | 1.017241 | 0.650393 |
| Malta            | 2013 | 1.027006 | 0.65451  |
| Malta            | 2014 | 1.031116 | 0.659429 |
| Malta            | 2015 | 1.140398 | 0.725348 |
| Malta            | 2016 | 1.132609 | 0.72308  |
| Malta            | 2017 | 1.126121 | 0.720151 |
| Malta            | 2018 | 1.114579 | 0.716802 |
| Malta            | 2019 | 1.098586 | 0.713248 |
| Marshall Islands | 1990 | 0.829497 | 0.73961  |
| Marshall Islands | 1991 | 0.84873  | 0.754036 |
| Marshall Islands | 1992 | 0.862116 | 0.764425 |
| Marshall Islands | 1993 | 0.895229 | 0.794611 |
| Marshall Islands | 1994 | 1.000765 | 0.922647 |
| Marshall Islands | 1995 | 1.014702 | 0.941943 |
| Marshall Islands | 1996 | 1.041135 | 0.970383 |
| Marshall Islands | 1997 | 1.044842 | 0.980008 |
| Marshall Islands | 1998 | 1.04679  | 0.986713 |
| Marshall Islands | 1999 | 1.041891 | 0.986813 |
| Marshall Islands | 2000 | 1.037892 | 0.986503 |
| Marshall Islands | 2001 | 1.034632 | 0.986928 |
| Marshall Islands | 2002 | 1.035458 | 0.991621 |
| Marshall Islands | 2003 | 1.033946 | 0.994506 |
| Marshall Islands | 2004 | 1.043391 | 1.007015 |
| Marshall Islands | 2005 | 1.033638 | 1.00178  |

|                  |      |          |          |
|------------------|------|----------|----------|
| Marshall Islands | 2006 | 1.024225 | 0.996898 |
| Marshall Islands | 2007 | 1.005892 | 0.982809 |
| Marshall Islands | 2008 | 0.989552 | 0.970255 |
| Marshall Islands | 2009 | 0.978998 | 0.962731 |
| Marshall Islands | 2010 | 0.973948 | 0.960239 |
| Marshall Islands | 2011 | 0.966812 | 0.954487 |
| Marshall Islands | 2012 | 0.960175 | 0.948971 |
| Marshall Islands | 2013 | 0.955867 | 0.945321 |
| Marshall Islands | 2014 | 0.950784 | 0.939663 |
| Marshall Islands | 2015 | 0.947166 | 0.936217 |
| Marshall Islands | 2016 | 0.946444 | 0.934338 |
| Marshall Islands | 2017 | 0.948871 | 0.935285 |
| Marshall Islands | 2018 | 0.94816  | 0.933495 |
| Marshall Islands | 2019 | 0.948073 | 0.931827 |
| Mauritania       | 1990 | 1.292419 | 1.123301 |
| Mauritania       | 1991 | 1.304114 | 1.144613 |
| Mauritania       | 1992 | 1.311313 | 1.163473 |
| Mauritania       | 1993 | 1.316344 | 1.181659 |
| Mauritania       | 1994 | 1.321783 | 1.193751 |
| Mauritania       | 1995 | 1.330612 | 1.208804 |
| Mauritania       | 1996 | 1.334792 | 1.220411 |
| Mauritania       | 1997 | 1.337735 | 1.23014  |
| Mauritania       | 1998 | 1.342861 | 1.23923  |
| Mauritania       | 1999 | 1.355719 | 1.257931 |
| Mauritania       | 2000 | 1.354422 | 1.266274 |

|            |      |          |          |
|------------|------|----------|----------|
| Mauritania | 2001 | 1.338039 | 1.263431 |
| Mauritania | 2002 | 1.326071 | 1.263031 |
| Mauritania | 2003 | 1.32429  | 1.269958 |
| Mauritania | 2004 | 1.312932 | 1.26527  |
| Mauritania | 2005 | 1.308692 | 1.266842 |
| Mauritania | 2006 | 1.304456 | 1.274066 |
| Mauritania | 2007 | 1.286568 | 1.263329 |
| Mauritania | 2008 | 1.259677 | 1.245972 |
| Mauritania | 2009 | 1.226907 | 1.223864 |
| Mauritania | 2010 | 1.206542 | 1.21002  |
| Mauritania | 2011 | 1.194471 | 1.198175 |
| Mauritania | 2012 | 1.18269  | 1.187555 |
| Mauritania | 2013 | 1.170872 | 1.180314 |
| Mauritania | 2014 | 1.181396 | 1.189417 |
| Mauritania | 2015 | 1.185942 | 1.195127 |
| Mauritania | 2016 | 1.190154 | 1.203213 |
| Mauritania | 2017 | 1.186943 | 1.204661 |
| Mauritania | 2018 | 1.18427  | 1.206028 |
| Mauritania | 2019 | 1.182881 | 1.204325 |
| Mauritius  | 1990 | 0.93321  | 0.754336 |
| Mauritius  | 1991 | 0.950503 | 0.755029 |
| Mauritius  | 1992 | 1.044833 | 0.830833 |
| Mauritius  | 1993 | 0.972502 | 0.775092 |
| Mauritius  | 1994 | 0.996268 | 0.7839   |
| Mauritius  | 1995 | 0.988114 | 0.789355 |

|           |      |          |          |
|-----------|------|----------|----------|
| Mauritius | 1996 | 0.923973 | 0.738861 |
| Mauritius | 1997 | 0.899823 | 0.699261 |
| Mauritius | 1998 | 0.910683 | 0.702415 |
| Mauritius | 1999 | 0.928566 | 0.717855 |
| Mauritius | 2000 | 0.995053 | 0.77431  |
| Mauritius | 2001 | 0.979239 | 0.769047 |
| Mauritius | 2002 | 0.899328 | 0.7055   |
| Mauritius | 2003 | 0.943053 | 0.733968 |
| Mauritius | 2004 | 0.925262 | 0.723859 |
| Mauritius | 2005 | 0.92733  | 0.727248 |
| Mauritius | 2006 | 0.942548 | 0.745284 |
| Mauritius | 2007 | 0.934733 | 0.753928 |
| Mauritius | 2008 | 0.902499 | 0.735209 |
| Mauritius | 2009 | 0.855919 | 0.696554 |
| Mauritius | 2010 | 0.884717 | 0.710758 |
| Mauritius | 2011 | 0.843754 | 0.678107 |
| Mauritius | 2012 | 0.895397 | 0.714052 |
| Mauritius | 2013 | 0.870548 | 0.695416 |
| Mauritius | 2014 | 0.872555 | 0.701738 |
| Mauritius | 2015 | 0.849229 | 0.685232 |
| Mauritius | 2016 | 0.828713 | 0.669571 |
| Mauritius | 2017 | 0.889327 | 0.717066 |
| Mauritius | 2018 | 0.873638 | 0.706288 |
| Mauritius | 2019 | 0.865816 | 0.699819 |
| Mexico    | 1990 | 1.078398 | 1.048632 |

|        |      |          |          |
|--------|------|----------|----------|
| Mexico | 1991 | 1.075019 | 1.040023 |
| Mexico | 1992 | 1.086669 | 1.043003 |
| Mexico | 1993 | 1.091016 | 1.040778 |
| Mexico | 1994 | 1.082324 | 1.027802 |
| Mexico | 1995 | 1.095406 | 1.033573 |
| Mexico | 1996 | 1.094571 | 1.026731 |
| Mexico | 1997 | 1.094724 | 1.022765 |
| Mexico | 1998 | 1.102235 | 1.022629 |
| Mexico | 1999 | 1.120489 | 1.033242 |
| Mexico | 2000 | 1.097268 | 1.009582 |
| Mexico | 2001 | 1.101573 | 1.009819 |
| Mexico | 2002 | 1.080918 | 0.987715 |
| Mexico | 2003 | 1.074058 | 0.97873  |
| Mexico | 2004 | 1.071029 | 0.974993 |
| Mexico | 2005 | 1.053626 | 0.959082 |
| Mexico | 2006 | 1.049174 | 0.953395 |
| Mexico | 2007 | 1.047691 | 0.950921 |
| Mexico | 2008 | 1.020609 | 0.923375 |
| Mexico | 2009 | 1.031489 | 0.928038 |
| Mexico | 2010 | 1.033104 | 0.92865  |
| Mexico | 2011 | 1.016719 | 0.911677 |
| Mexico | 2012 | 1.010454 | 0.902523 |
| Mexico | 2013 | 0.984236 | 0.875506 |
| Mexico | 2014 | 0.978046 | 0.867256 |
| Mexico | 2015 | 0.960093 | 0.848844 |



|                                  |      |          |          |
|----------------------------------|------|----------|----------|
| Mexico                           | 2016 | 0.946389 | 0.834406 |
| Mexico                           | 2017 | 0.919663 | 0.808347 |
| Mexico                           | 2018 | 0.92066  | 0.806294 |
| Mexico                           | 2019 | 0.912661 | 0.794804 |
| Micronesia (Federated States of) | 1990 | 1.044948 | 0.976014 |
| Micronesia (Federated States of) | 1991 | 1.063367 | 0.987065 |
| Micronesia (Federated States of) | 1992 | 1.085287 | 1.00053  |
| Micronesia (Federated States of) | 1993 | 1.104225 | 1.010412 |
| Micronesia (Federated States of) | 1994 | 1.127485 | 1.023454 |
| Micronesia (Federated States of) | 1995 | 1.154087 | 1.039054 |
| Micronesia (Federated States of) | 1996 | 1.175387 | 1.049479 |
| Micronesia (Federated States of) | 1997 | 1.192982 | 1.057541 |
| Micronesia (Federated States of) | 1998 | 1.205251 | 1.061571 |
| Micronesia (Federated States of) | 1999 | 1.216182 | 1.065192 |
| Micronesia (Federated States of) | 2000 | 1.22136  | 1.064296 |
| Micronesia (Federated States of) | 2001 | 1.227829 | 1.06496  |
| Micronesia (Federated States of) | 2002 | 1.23739  | 1.069029 |
| Micronesia (Federated States of) | 2003 | 1.224554 | 1.054574 |
| Micronesia (Federated States of) | 2004 | 1.221401 | 1.049043 |
| Micronesia (Federated States of) | 2005 | 1.212073 | 1.039666 |
| Micronesia (Federated States of) | 2006 | 1.227931 | 1.050787 |
| Micronesia (Federated States of) | 2007 | 1.19562  | 1.021078 |
| Micronesia (Federated States of) | 2008 | 1.162752 | 0.99167  |
| Micronesia (Federated States of) | 2009 | 1.129838 | 0.96289  |
| Micronesia (Federated States of) | 2010 | 1.101329 | 0.937482 |

|                                  |      |          |          |
|----------------------------------|------|----------|----------|
| Micronesia (Federated States of) | 2011 | 1.064706 | 0.907    |
| Micronesia (Federated States of) | 2012 | 1.034839 | 0.882568 |
| Micronesia (Federated States of) | 2013 | 1.009272 | 0.861923 |
| Micronesia (Federated States of) | 2014 | 0.988996 | 0.845971 |
| Micronesia (Federated States of) | 2015 | 0.97729  | 0.835961 |
| Micronesia (Federated States of) | 2016 | 0.962942 | 0.825061 |
| Micronesia (Federated States of) | 2017 | 0.959648 | 0.823572 |
| Micronesia (Federated States of) | 2018 | 0.955921 | 0.821916 |
| Micronesia (Federated States of) | 2019 | 0.951491 | 0.819525 |
| Monaco                           | 1990 | 0.925141 | 0.509605 |
| Monaco                           | 1991 | 0.927871 | 0.511247 |
| Monaco                           | 1992 | 0.935894 | 0.515033 |
| Monaco                           | 1993 | 0.947152 | 0.520603 |
| Monaco                           | 1994 | 0.958841 | 0.52651  |
| Monaco                           | 1995 | 0.968499 | 0.532215 |
| Monaco                           | 1996 | 0.976394 | 0.538766 |
| Monaco                           | 1997 | 0.991226 | 0.548622 |
| Monaco                           | 1998 | 1.010798 | 0.560403 |
| Monaco                           | 1999 | 1.034407 | 0.573567 |
| Monaco                           | 2000 | 1.055584 | 0.586374 |
| Monaco                           | 2001 | 1.068534 | 0.59852  |
| Monaco                           | 2002 | 1.075324 | 0.609122 |
| Monaco                           | 2003 | 1.081212 | 0.620175 |
| Monaco                           | 2004 | 1.086635 | 0.630366 |
| Monaco                           | 2005 | 1.088433 | 0.639145 |

|          |      |          |          |
|----------|------|----------|----------|
| Monaco   | 2006 | 1.082645 | 0.645151 |
| Monaco   | 2007 | 1.070951 | 0.648902 |
| Monaco   | 2008 | 1.059886 | 0.653042 |
| Monaco   | 2009 | 1.054282 | 0.658945 |
| Monaco   | 2010 | 1.052876 | 0.666098 |
| Monaco   | 2011 | 1.050548 | 0.672052 |
| Monaco   | 2012 | 1.046823 | 0.678352 |
| Monaco   | 2013 | 1.03124  | 0.674487 |
| Monaco   | 2014 | 1.025477 | 0.675192 |
| Monaco   | 2015 | 1.022501 | 0.676323 |
| Monaco   | 2016 | 1.017735 | 0.675253 |
| Monaco   | 2017 | 1.011475 | 0.673635 |
| Monaco   | 2018 | 1.004845 | 0.672659 |
| Monaco   | 2019 | 0.997704 | 0.670993 |
| Mongolia | 1990 | 1.068489 | 0.837677 |
| Mongolia | 1991 | 1.083221 | 0.846939 |
| Mongolia | 1992 | 1.081256 | 0.854461 |
| Mongolia | 1993 | 1.092407 | 0.854763 |
| Mongolia | 1994 | 1.087824 | 0.850761 |
| Mongolia | 1995 | 1.079002 | 0.852306 |
| Mongolia | 1996 | 1.060124 | 0.840739 |
| Mongolia | 1997 | 1.082339 | 0.856448 |
| Mongolia | 1998 | 1.074045 | 0.833624 |
| Mongolia | 1999 | 1.084455 | 0.837111 |
| Mongolia | 2000 | 1.047604 | 0.821764 |

|            |      |          |          |
|------------|------|----------|----------|
| Mongolia   | 2001 | 0.976921 | 0.761449 |
| Mongolia   | 2002 | 0.921562 | 0.715086 |
| Mongolia   | 2003 | 0.882353 | 0.687733 |
| Mongolia   | 2004 | 0.854392 | 0.675443 |
| Mongolia   | 2005 | 0.832971 | 0.664011 |
| Mongolia   | 2006 | 0.833794 | 0.662218 |
| Mongolia   | 2007 | 0.823721 | 0.663589 |
| Mongolia   | 2008 | 0.819758 | 0.675399 |
| Mongolia   | 2009 | 0.832738 | 0.69269  |
| Mongolia   | 2010 | 0.825495 | 0.676345 |
| Mongolia   | 2011 | 0.81695  | 0.665265 |
| Mongolia   | 2012 | 0.819276 | 0.684519 |
| Mongolia   | 2013 | 0.808343 | 0.682186 |
| Mongolia   | 2014 | 0.795602 | 0.677174 |
| Mongolia   | 2015 | 0.795543 | 0.676357 |
| Mongolia   | 2016 | 0.790086 | 0.663606 |
| Mongolia   | 2017 | 0.794348 | 0.661505 |
| Mongolia   | 2018 | 0.793758 | 0.653293 |
| Mongolia   | 2019 | 0.788673 | 0.633037 |
| Montenegro | 1990 | 0.730016 | 0.531763 |
| Montenegro | 1991 | 0.733277 | 0.528923 |
| Montenegro | 1992 | 0.752784 | 0.539443 |
| Montenegro | 1993 | 0.760196 | 0.546079 |
| Montenegro | 1994 | 0.793137 | 0.571782 |
| Montenegro | 1995 | 0.803658 | 0.58153  |

|            |      |          |          |
|------------|------|----------|----------|
| Montenegro | 1996 | 0.816688 | 0.593459 |
| Montenegro | 1997 | 0.803945 | 0.587557 |
| Montenegro | 1998 | 0.800749 | 0.587413 |
| Montenegro | 1999 | 0.806197 | 0.590958 |
| Montenegro | 2000 | 0.831277 | 0.61343  |
| Montenegro | 2001 | 0.83478  | 0.624572 |
| Montenegro | 2002 | 0.812396 | 0.611387 |
| Montenegro | 2003 | 0.800159 | 0.604112 |
| Montenegro | 2004 | 0.776479 | 0.583612 |
| Montenegro | 2005 | 0.749911 | 0.558299 |
| Montenegro | 2006 | 0.761925 | 0.567128 |
| Montenegro | 2007 | 0.800333 | 0.592415 |
| Montenegro | 2008 | 0.829676 | 0.616523 |
| Montenegro | 2009 | 0.849739 | 0.637266 |
| Montenegro | 2010 | 0.862346 | 0.649889 |
| Montenegro | 2011 | 0.845212 | 0.642788 |
| Montenegro | 2012 | 0.851893 | 0.648937 |
| Montenegro | 2013 | 0.843268 | 0.645223 |
| Montenegro | 2014 | 0.848705 | 0.651204 |
| Montenegro | 2015 | 0.842623 | 0.641021 |
| Montenegro | 2016 | 0.809543 | 0.606147 |
| Montenegro | 2017 | 0.802626 | 0.594613 |
| Montenegro | 2018 | 0.825529 | 0.60972  |
| Montenegro | 2019 | 0.810302 | 0.592792 |
| Morocco    | 1990 | 0.99491  | 0.878909 |

|         |      |          |          |
|---------|------|----------|----------|
| Morocco | 1991 | 0.991678 | 0.881717 |
| Morocco | 1992 | 0.946036 | 0.847594 |
| Morocco | 1993 | 0.935928 | 0.840068 |
| Morocco | 1994 | 0.94912  | 0.849024 |
| Morocco | 1995 | 0.952789 | 0.849879 |
| Morocco | 1996 | 0.973631 | 0.873777 |
| Morocco | 1997 | 0.987708 | 0.885371 |
| Morocco | 1998 | 0.96864  | 0.862799 |
| Morocco | 1999 | 0.966075 | 0.851575 |
| Morocco | 2000 | 1.027192 | 0.934749 |
| Morocco | 2001 | 1.1055   | 1.039632 |
| Morocco | 2002 | 1.172219 | 1.105859 |
| Morocco | 2003 | 1.178042 | 1.112077 |
| Morocco | 2004 | 1.210291 | 1.158825 |
| Morocco | 2005 | 1.232854 | 1.193653 |
| Morocco | 2006 | 1.241772 | 1.213695 |
| Morocco | 2007 | 1.25736  | 1.236321 |
| Morocco | 2008 | 1.258971 | 1.247946 |
| Morocco | 2009 | 1.258156 | 1.25791  |
| Morocco | 2010 | 1.260311 | 1.270169 |
| Morocco | 2011 | 1.257748 | 1.277081 |
| Morocco | 2012 | 1.235274 | 1.256931 |
| Morocco | 2013 | 1.049889 | 1.040043 |
| Morocco | 2014 | 1.068511 | 1.042004 |
| Morocco | 2015 | 1.085833 | 1.043414 |

|            |      |          |          |
|------------|------|----------|----------|
| Morocco    | 2016 | 1.097535 | 1.040243 |
| Morocco    | 2017 | 1.107104 | 1.035671 |
| Morocco    | 2018 | 1.112476 | 1.03045  |
| Morocco    | 2019 | 1.116306 | 1.025441 |
| Mozambique | 1990 | 0.7455   | 0.632955 |
| Mozambique | 1991 | 0.740092 | 0.623329 |
| Mozambique | 1992 | 0.735712 | 0.617705 |
| Mozambique | 1993 | 0.723898 | 0.608977 |
| Mozambique | 1994 | 0.719732 | 0.605701 |
| Mozambique | 1995 | 0.713228 | 0.598496 |
| Mozambique | 1996 | 0.714012 | 0.596174 |
| Mozambique | 1997 | 0.715332 | 0.594212 |
| Mozambique | 1998 | 0.710254 | 0.587737 |
| Mozambique | 1999 | 0.702769 | 0.579659 |
| Mozambique | 2000 | 0.692727 | 0.56899  |
| Mozambique | 2001 | 0.678268 | 0.555227 |
| Mozambique | 2002 | 0.669768 | 0.545593 |
| Mozambique | 2003 | 0.664322 | 0.539428 |
| Mozambique | 2004 | 0.664309 | 0.538267 |
| Mozambique | 2005 | 0.67067  | 0.543276 |
| Mozambique | 2006 | 0.666668 | 0.537137 |
| Mozambique | 2007 | 0.666481 | 0.536097 |
| Mozambique | 2008 | 0.66311  | 0.534174 |
| Mozambique | 2009 | 0.663878 | 0.535535 |
| Mozambique | 2010 | 0.664697 | 0.536946 |

|            |      |          |          |
|------------|------|----------|----------|
| Mozambique | 2011 | 0.665384 | 0.538654 |
| Mozambique | 2012 | 0.666639 | 0.540631 |
| Mozambique | 2013 | 0.667253 | 0.542927 |
| Mozambique | 2014 | 0.670594 | 0.547312 |
| Mozambique | 2015 | 0.676028 | 0.553124 |
| Mozambique | 2016 | 0.678167 | 0.557826 |
| Mozambique | 2017 | 0.68422  | 0.56494  |
| Mozambique | 2018 | 0.686623 | 0.567848 |
| Mozambique | 2019 | 0.689936 | 0.571072 |
| Myanmar    | 1990 | 1.18372  | 0.956469 |
| Myanmar    | 1991 | 1.186191 | 0.955607 |
| Myanmar    | 1992 | 1.19093  | 0.957006 |
| Myanmar    | 1993 | 1.194359 | 0.957396 |
| Myanmar    | 1994 | 1.1991   | 0.959002 |
| Myanmar    | 1995 | 1.201551 | 0.957968 |
| Myanmar    | 1996 | 1.201112 | 0.955698 |
| Myanmar    | 1997 | 1.200431 | 0.953416 |
| Myanmar    | 1998 | 1.201065 | 0.952161 |
| Myanmar    | 1999 | 1.200264 | 0.950136 |
| Myanmar    | 2000 | 1.205709 | 0.953426 |
| Myanmar    | 2001 | 1.200051 | 0.949125 |
| Myanmar    | 2002 | 1.197862 | 0.947276 |
| Myanmar    | 2003 | 1.20639  | 0.952919 |
| Myanmar    | 2004 | 1.192564 | 0.942485 |
| Myanmar    | 2005 | 1.178545 | 0.930368 |



|         |      |          |          |
|---------|------|----------|----------|
| Myanmar | 2006 | 1.17357  | 0.924872 |
| Myanmar | 2007 | 1.161685 | 0.914034 |
| Myanmar | 2008 | 1.150781 | 0.9032   |
| Myanmar | 2009 | 1.127682 | 0.883668 |
| Myanmar | 2010 | 1.099544 | 0.859687 |
| Myanmar | 2011 | 1.071159 | 0.835402 |
| Myanmar | 2012 | 1.05088  | 0.816291 |
| Myanmar | 2013 | 1.050014 | 0.812047 |
| Myanmar | 2014 | 1.048675 | 0.807729 |
| Myanmar | 2015 | 1.048365 | 0.80387  |
| Myanmar | 2016 | 1.049722 | 0.801738 |
| Myanmar | 2017 | 1.060853 | 0.807818 |
| Myanmar | 2018 | 1.06684  | 0.8106   |
| Myanmar | 2019 | 1.070598 | 0.810062 |
| Namibia | 1990 | 0.520952 | 0.414139 |
| Namibia | 1991 | 0.518697 | 0.41023  |
| Namibia | 1992 | 0.514996 | 0.405404 |
| Namibia | 1993 | 0.516465 | 0.404232 |
| Namibia | 1994 | 0.514588 | 0.401503 |
| Namibia | 1995 | 0.514977 | 0.400811 |
| Namibia | 1996 | 0.512347 | 0.398035 |
| Namibia | 1997 | 0.520707 | 0.40232  |
| Namibia | 1998 | 0.528704 | 0.406669 |
| Namibia | 1999 | 0.536913 | 0.411569 |
| Namibia | 2000 | 0.542403 | 0.414466 |

|         |      |          |          |
|---------|------|----------|----------|
| Namibia | 2001 | 0.536134 | 0.40849  |
| Namibia | 2002 | 0.535634 | 0.406544 |
| Namibia | 2003 | 0.527334 | 0.398785 |
| Namibia | 2004 | 0.515515 | 0.38807  |
| Namibia | 2005 | 0.50934  | 0.380508 |
| Namibia | 2006 | 0.512883 | 0.379323 |
| Namibia | 2007 | 0.520243 | 0.380621 |
| Namibia | 2008 | 0.525957 | 0.380947 |
| Namibia | 2009 | 0.537255 | 0.385315 |
| Namibia | 2010 | 0.542963 | 0.386363 |
| Namibia | 2011 | 0.547274 | 0.385731 |
| Namibia | 2012 | 0.562226 | 0.393271 |
| Namibia | 2013 | 0.570154 | 0.396655 |
| Namibia | 2014 | 0.579949 | 0.402086 |
| Namibia | 2015 | 0.589423 | 0.407695 |
| Namibia | 2016 | 0.596258 | 0.411905 |
| Namibia | 2017 | 0.601077 | 0.414841 |
| Namibia | 2018 | 0.606703 | 0.418179 |
| Namibia | 2019 | 0.61335  | 0.422065 |
| Nauru   | 1990 | 0.841129 | 0.90935  |
| Nauru   | 1991 | 0.836849 | 0.90501  |
| Nauru   | 1992 | 0.838949 | 0.908351 |
| Nauru   | 1993 | 0.81655  | 0.888291 |
| Nauru   | 1994 | 0.827685 | 0.897083 |
| Nauru   | 1995 | 0.825315 | 0.892624 |

|       |      |          |          |
|-------|------|----------|----------|
| Nauru | 1996 | 0.835952 | 0.896632 |
| Nauru | 1997 | 0.847038 | 0.900004 |
| Nauru | 1998 | 0.859692 | 0.901619 |
| Nauru | 1999 | 0.855559 | 0.887218 |
| Nauru | 2000 | 0.855925 | 0.875318 |
| Nauru | 2001 | 0.857772 | 0.863824 |
| Nauru | 2002 | 0.845386 | 0.844801 |
| Nauru | 2003 | 0.839563 | 0.830172 |
| Nauru | 2004 | 0.843791 | 0.82551  |
| Nauru | 2005 | 0.830454 | 0.805166 |
| Nauru | 2006 | 0.821763 | 0.78876  |
| Nauru | 2007 | 0.806174 | 0.767626 |
| Nauru | 2008 | 0.793628 | 0.750901 |
| Nauru | 2009 | 0.787585 | 0.740255 |
| Nauru | 2010 | 0.783428 | 0.733114 |
| Nauru | 2011 | 0.782513 | 0.727983 |
| Nauru | 2012 | 0.78002  | 0.722149 |
| Nauru | 2013 | 0.779317 | 0.718327 |
| Nauru | 2014 | 0.776438 | 0.713153 |
| Nauru | 2015 | 0.78012  | 0.712964 |
| Nauru | 2016 | 0.786155 | 0.71382  |
| Nauru | 2017 | 0.797984 | 0.719267 |
| Nauru | 2018 | 0.809922 | 0.723824 |
| Nauru | 2019 | 0.822037 | 0.727821 |
| Nepal | 1990 | 1.006487 | 0.88658  |

|       |      |          |          |
|-------|------|----------|----------|
| Nepal | 1991 | 1.008787 | 0.889125 |
| Nepal | 1992 | 1.017032 | 0.897647 |
| Nepal | 1993 | 1.009764 | 0.893959 |
| Nepal | 1994 | 0.999923 | 0.887975 |
| Nepal | 1995 | 0.980684 | 0.874587 |
| Nepal | 1996 | 0.960356 | 0.859834 |
| Nepal | 1997 | 0.932334 | 0.838205 |
| Nepal | 1998 | 0.9169   | 0.826599 |
| Nepal | 1999 | 0.913889 | 0.824936 |
| Nepal | 2000 | 0.891626 | 0.807733 |
| Nepal | 2001 | 0.885184 | 0.803387 |
| Nepal | 2002 | 0.88509  | 0.80353  |
| Nepal | 2003 | 0.886223 | 0.804379 |
| Nepal | 2004 | 0.88261  | 0.801964 |
| Nepal | 2005 | 0.88549  | 0.803022 |
| Nepal | 2006 | 0.885284 | 0.802625 |
| Nepal | 2007 | 0.895269 | 0.810404 |
| Nepal | 2008 | 0.906467 | 0.818901 |
| Nepal | 2009 | 0.920021 | 0.829422 |
| Nepal | 2010 | 0.946883 | 0.850073 |
| Nepal | 2011 | 0.956762 | 0.857514 |
| Nepal | 2012 | 0.976914 | 0.871798 |
| Nepal | 2013 | 0.994293 | 0.883126 |
| Nepal | 2014 | 1.016476 | 0.898038 |
| Nepal | 2015 | 1.035396 | 0.907818 |

|             |      |          |          |
|-------------|------|----------|----------|
| Nepal       | 2016 | 1.049671 | 0.914186 |
| Nepal       | 2017 | 1.063584 | 0.920054 |
| Nepal       | 2018 | 1.076166 | 0.92446  |
| Nepal       | 2019 | 1.087308 | 0.926945 |
| Netherlands | 1990 | 1.447557 | 0.744821 |
| Netherlands | 1991 | 1.476313 | 0.748788 |
| Netherlands | 1992 | 1.479029 | 0.741339 |
| Netherlands | 1993 | 1.466228 | 0.727559 |
| Netherlands | 1994 | 1.509769 | 0.744292 |
| Netherlands | 1995 | 1.525182 | 0.750735 |
| Netherlands | 1996 | 1.511319 | 0.746839 |
| Netherlands | 1997 | 1.502871 | 0.745412 |
| Netherlands | 1998 | 1.468095 | 0.728972 |
| Netherlands | 1999 | 1.439072 | 0.71541  |
| Netherlands | 2000 | 1.39814  | 0.697868 |
| Netherlands | 2001 | 1.413555 | 0.709338 |
| Netherlands | 2002 | 1.425754 | 0.719386 |
| Netherlands | 2003 | 1.388924 | 0.704545 |
| Netherlands | 2004 | 1.400944 | 0.709384 |
| Netherlands | 2005 | 1.401287 | 0.709922 |
| Netherlands | 2006 | 1.401839 | 0.710847 |
| Netherlands | 2007 | 1.402669 | 0.714385 |
| Netherlands | 2008 | 1.406942 | 0.72216  |
| Netherlands | 2009 | 1.40736  | 0.727049 |
| Netherlands | 2010 | 1.421272 | 0.736793 |

|             |      |          |          |
|-------------|------|----------|----------|
| Netherlands | 2011 | 1.446806 | 0.757099 |
| Netherlands | 2012 | 1.442136 | 0.762483 |
| Netherlands | 2013 | 1.430792 | 0.767487 |
| Netherlands | 2014 | 1.440957 | 0.786282 |
| Netherlands | 2015 | 1.412873 | 0.785196 |
| Netherlands | 2016 | 1.402363 | 0.791495 |
| Netherlands | 2017 | 1.364227 | 0.786008 |
| Netherlands | 2018 | 1.345275 | 0.792336 |
| Netherlands | 2019 | 1.31752  | 0.791067 |
| New Zealand | 1990 | 1.066192 | 0.705987 |
| New Zealand | 1991 | 1.063794 | 0.698293 |
| New Zealand | 1992 | 0.993804 | 0.647648 |
| New Zealand | 1993 | 0.990158 | 0.641685 |
| New Zealand | 1994 | 0.975831 | 0.628564 |
| New Zealand | 1995 | 0.987665 | 0.632708 |
| New Zealand | 1996 | 1.006324 | 0.639629 |
| New Zealand | 1997 | 0.977481 | 0.622835 |
| New Zealand | 1998 | 0.981552 | 0.627138 |
| New Zealand | 1999 | 0.975372 | 0.624972 |
| New Zealand | 2000 | 0.962181 | 0.62377  |
| New Zealand | 2001 | 0.943874 | 0.613128 |
| New Zealand | 2002 | 0.97546  | 0.637451 |
| New Zealand | 2003 | 0.971302 | 0.637979 |
| New Zealand | 2004 | 0.993113 | 0.655944 |
| New Zealand | 2005 | 0.992803 | 0.66123  |

|             |      |          |          |
|-------------|------|----------|----------|
| New Zealand | 2006 | 0.984374 | 0.661881 |
| New Zealand | 2007 | 0.956275 | 0.65261  |
| New Zealand | 2008 | 0.960295 | 0.664472 |
| New Zealand | 2009 | 0.944662 | 0.656956 |
| New Zealand | 2010 | 0.959474 | 0.671581 |
| New Zealand | 2011 | 0.954743 | 0.674297 |
| New Zealand | 2012 | 0.930048 | 0.664193 |
| New Zealand | 2013 | 0.924215 | 0.667159 |
| New Zealand | 2014 | 0.91942  | 0.665934 |
| New Zealand | 2015 | 0.941312 | 0.687821 |
| New Zealand | 2016 | 0.929588 | 0.68481  |
| New Zealand | 2017 | 0.927328 | 0.689256 |
| New Zealand | 2018 | 0.893293 | 0.670898 |
| New Zealand | 2019 | 0.881984 | 0.667259 |
| Nicaragua   | 1990 | 0.522688 | 0.397753 |
| Nicaragua   | 1991 | 0.514671 | 0.395575 |
| Nicaragua   | 1992 | 0.515144 | 0.395474 |
| Nicaragua   | 1993 | 0.52376  | 0.401308 |
| Nicaragua   | 1994 | 0.495389 | 0.382344 |
| Nicaragua   | 1995 | 0.657199 | 0.544353 |
| Nicaragua   | 1996 | 0.644636 | 0.542242 |
| Nicaragua   | 1997 | 0.630431 | 0.535664 |
| Nicaragua   | 1998 | 0.618795 | 0.531651 |
| Nicaragua   | 1999 | 0.572153 | 0.497733 |
| Nicaragua   | 2000 | 0.578434 | 0.508295 |

|           |      |          |          |
|-----------|------|----------|----------|
| Nicaragua | 2001 | 0.593106 | 0.527615 |
| Nicaragua | 2002 | 0.583986 | 0.525227 |
| Nicaragua | 2003 | 0.551447 | 0.49958  |
| Nicaragua | 2004 | 0.557455 | 0.50602  |
| Nicaragua | 2005 | 0.538036 | 0.48986  |
| Nicaragua | 2006 | 0.52597  | 0.477105 |
| Nicaragua | 2007 | 0.544361 | 0.49303  |
| Nicaragua | 2008 | 0.539564 | 0.48876  |
| Nicaragua | 2009 | 0.545132 | 0.49153  |
| Nicaragua | 2010 | 0.550934 | 0.493435 |
| Nicaragua | 2011 | 0.535405 | 0.477532 |
| Nicaragua | 2012 | 0.522062 | 0.46299  |
| Nicaragua | 2013 | 0.524102 | 0.460842 |
| Nicaragua | 2014 | 0.537312 | 0.467204 |
| Nicaragua | 2015 | 0.557047 | 0.479269 |
| Nicaragua | 2016 | 0.541955 | 0.463483 |
| Nicaragua | 2017 | 0.558139 | 0.471183 |
| Nicaragua | 2018 | 0.560598 | 0.468403 |
| Nicaragua | 2019 | 0.562831 | 0.466458 |
| Niger     | 1990 | 0.810415 | 0.758079 |
| Niger     | 1991 | 0.826226 | 0.773965 |
| Niger     | 1992 | 0.838852 | 0.788117 |
| Niger     | 1993 | 0.845358 | 0.798159 |
| Niger     | 1994 | 0.855762 | 0.808671 |
| Niger     | 1995 | 0.860737 | 0.809156 |



|         |      |          |          |
|---------|------|----------|----------|
| Niger   | 1996 | 0.856771 | 0.807281 |
| Niger   | 1997 | 0.855472 | 0.806414 |
| Niger   | 1998 | 0.843432 | 0.798485 |
| Niger   | 1999 | 0.828745 | 0.782915 |
| Niger   | 2000 | 0.819592 | 0.771369 |
| Niger   | 2001 | 0.806746 | 0.759651 |
| Niger   | 2002 | 0.797001 | 0.752312 |
| Niger   | 2003 | 0.787058 | 0.746425 |
| Niger   | 2004 | 0.775544 | 0.739366 |
| Niger   | 2005 | 0.766949 | 0.727909 |
| Niger   | 2006 | 0.756655 | 0.71908  |
| Niger   | 2007 | 0.750941 | 0.711134 |
| Niger   | 2008 | 0.743702 | 0.704064 |
| Niger   | 2009 | 0.735897 | 0.69378  |
| Niger   | 2010 | 0.727739 | 0.684338 |
| Niger   | 2011 | 0.726785 | 0.678833 |
| Niger   | 2012 | 0.724445 | 0.674636 |
| Niger   | 2013 | 0.718303 | 0.669687 |
| Niger   | 2014 | 0.722409 | 0.67305  |
| Niger   | 2015 | 0.724784 | 0.671592 |
| Niger   | 2016 | 0.724831 | 0.672213 |
| Niger   | 2017 | 0.726952 | 0.673326 |
| Niger   | 2018 | 0.721766 | 0.673434 |
| Niger   | 2019 | 0.724118 | 0.675679 |
| Nigeria | 1990 | 0.942702 | 0.872561 |

|         |      |          |          |
|---------|------|----------|----------|
| Nigeria | 1991 | 0.934436 | 0.872282 |
| Nigeria | 1992 | 0.924894 | 0.872943 |
| Nigeria | 1993 | 0.914077 | 0.870767 |
| Nigeria | 1994 | 0.906826 | 0.871447 |
| Nigeria | 1995 | 0.895881 | 0.866064 |
| Nigeria | 1996 | 0.885105 | 0.861683 |
| Nigeria | 1997 | 0.881762 | 0.864812 |
| Nigeria | 1998 | 0.87083  | 0.860374 |
| Nigeria | 1999 | 0.852298 | 0.847813 |
| Nigeria | 2000 | 0.834291 | 0.834275 |
| Nigeria | 2001 | 0.819429 | 0.824864 |
| Nigeria | 2002 | 0.807634 | 0.81888  |
| Nigeria | 2003 | 0.793461 | 0.811085 |
| Nigeria | 2004 | 0.783844 | 0.806558 |
| Nigeria | 2005 | 0.771572 | 0.797225 |
| Nigeria | 2006 | 0.765569 | 0.792637 |
| Nigeria | 2007 | 0.759324 | 0.78688  |
| Nigeria | 2008 | 0.75287  | 0.779753 |
| Nigeria | 2009 | 0.745507 | 0.769981 |
| Nigeria | 2010 | 0.736712 | 0.759652 |
| Nigeria | 2011 | 0.734046 | 0.753786 |
| Nigeria | 2012 | 0.737838 | 0.751281 |
| Nigeria | 2013 | 0.734996 | 0.740608 |
| Nigeria | 2014 | 0.742661 | 0.740121 |
| Nigeria | 2015 | 0.754025 | 0.743835 |

|         |      |          |          |
|---------|------|----------|----------|
| Nigeria | 2016 | 0.763335 | 0.745167 |
| Nigeria | 2017 | 0.778616 | 0.75156  |
| Nigeria | 2018 | 0.793522 | 0.757511 |
| Nigeria | 2019 | 0.810217 | 0.764132 |
| Niue    | 1990 | 1.190231 | 0.775411 |
| Niue    | 1991 | 1.194033 | 0.789915 |
| Niue    | 1992 | 1.207319 | 0.812242 |
| Niue    | 1993 | 1.20373  | 0.823011 |
| Niue    | 1994 | 1.178585 | 0.817084 |
| Niue    | 1995 | 1.157887 | 0.813367 |
| Niue    | 1996 | 1.143385 | 0.814647 |
| Niue    | 1997 | 1.133241 | 0.820008 |
| Niue    | 1998 | 1.099876 | 0.807742 |
| Niue    | 1999 | 1.073953 | 0.798718 |
| Niue    | 2000 | 1.048715 | 0.788429 |
| Niue    | 2001 | 1.012068 | 0.767538 |
| Niue    | 2002 | 1.005777 | 0.76615  |
| Niue    | 2003 | 0.992871 | 0.757578 |
| Niue    | 2004 | 1.011142 | 0.772571 |
| Niue    | 2005 | 0.978883 | 0.747352 |
| Niue    | 2006 | 0.972596 | 0.743419 |
| Niue    | 2007 | 0.95894  | 0.733977 |
| Niue    | 2008 | 0.95539  | 0.73326  |
| Niue    | 2009 | 0.939876 | 0.721684 |
| Niue    | 2010 | 0.926776 | 0.71016  |

|                 |      |          |          |
|-----------------|------|----------|----------|
| Niue            | 2011 | 0.91639  | 0.701185 |
| Niue            | 2012 | 0.907389 | 0.69404  |
| Niue            | 2013 | 0.901788 | 0.689627 |
| Niue            | 2014 | 0.895694 | 0.683761 |
| Niue            | 2015 | 0.894766 | 0.680007 |
| Niue            | 2016 | 0.892505 | 0.676161 |
| Niue            | 2017 | 0.893889 | 0.676244 |
| Niue            | 2018 | 0.890768 | 0.674944 |
| Niue            | 2019 | 0.887772 | 0.673264 |
| North Macedonia | 1990 | 0.680204 | 0.58975  |
| North Macedonia | 1991 | 0.68378  | 0.5956   |
| North Macedonia | 1992 | 0.664624 | 0.571964 |
| North Macedonia | 1993 | 0.644703 | 0.547151 |
| North Macedonia | 1994 | 0.663149 | 0.555907 |
| North Macedonia | 1995 | 0.671096 | 0.552266 |
| North Macedonia | 1996 | 0.695813 | 0.563928 |
| North Macedonia | 1997 | 0.741597 | 0.594207 |
| North Macedonia | 1998 | 0.771646 | 0.617339 |
| North Macedonia | 1999 | 0.777685 | 0.616422 |
| North Macedonia | 2000 | 0.797954 | 0.622484 |
| North Macedonia | 2001 | 0.778443 | 0.606375 |
| North Macedonia | 2002 | 0.749492 | 0.587121 |
| North Macedonia | 2003 | 0.769429 | 0.60026  |
| North Macedonia | 2004 | 0.792515 | 0.614197 |
| North Macedonia | 2005 | 0.783544 | 0.610202 |

|                          |      |          |          |
|--------------------------|------|----------|----------|
| North Macedonia          | 2006 | 0.767706 | 0.60037  |
| North Macedonia          | 2007 | 0.791232 | 0.612007 |
| North Macedonia          | 2008 | 0.790856 | 0.612737 |
| North Macedonia          | 2009 | 0.763725 | 0.598462 |
| North Macedonia          | 2010 | 0.778915 | 0.614822 |
| North Macedonia          | 2011 | 0.793147 | 0.637721 |
| North Macedonia          | 2012 | 0.811289 | 0.66772  |
| North Macedonia          | 2013 | 0.780544 | 0.642134 |
| North Macedonia          | 2014 | 0.776893 | 0.636497 |
| North Macedonia          | 2015 | 0.799244 | 0.654666 |
| North Macedonia          | 2016 | 0.786323 | 0.643621 |
| North Macedonia          | 2017 | 0.788026 | 0.643868 |
| North Macedonia          | 2018 | 0.795756 | 0.652467 |
| North Macedonia          | 2019 | 0.797522 | 0.654678 |
| Northern Mariana Islands | 1990 | 0.904061 | 1.155126 |
| Northern Mariana Islands | 1991 | 0.908144 | 1.156065 |
| Northern Mariana Islands | 1992 | 0.940581 | 1.169589 |
| Northern Mariana Islands | 1993 | 0.975433 | 1.173898 |
| Northern Mariana Islands | 1994 | 1.002007 | 1.17191  |
| Northern Mariana Islands | 1995 | 1.003151 | 1.154852 |
| Northern Mariana Islands | 1996 | 0.987202 | 1.126734 |
| Northern Mariana Islands | 1997 | 0.968009 | 1.097328 |
| Northern Mariana Islands | 1998 | 0.947527 | 1.065921 |
| Northern Mariana Islands | 1999 | 0.959593 | 1.066621 |
| Northern Mariana Islands | 2000 | 0.952837 | 1.060532 |

|                          |      |          |          |
|--------------------------|------|----------|----------|
| Northern Mariana Islands | 2001 | 0.991994 | 1.099375 |
| Northern Mariana Islands | 2002 | 0.987834 | 1.094556 |
| Northern Mariana Islands | 2003 | 0.979144 | 1.077003 |
| Northern Mariana Islands | 2004 | 0.978766 | 1.061672 |
| Northern Mariana Islands | 2005 | 0.955494 | 1.027025 |
| Northern Mariana Islands | 2006 | 0.935982 | 1.000809 |
| Northern Mariana Islands | 2007 | 0.897664 | 0.960032 |
| Northern Mariana Islands | 2008 | 0.864887 | 0.927883 |
| Northern Mariana Islands | 2009 | 0.838403 | 0.903614 |
| Northern Mariana Islands | 2010 | 0.815518 | 0.876638 |
| Northern Mariana Islands | 2011 | 0.817938 | 0.865424 |
| Northern Mariana Islands | 2012 | 0.827228 | 0.851935 |
| Northern Mariana Islands | 2013 | 0.852758 | 0.850358 |
| Northern Mariana Islands | 2014 | 0.875267 | 0.849207 |
| Northern Mariana Islands | 2015 | 0.888178 | 0.851222 |
| Northern Mariana Islands | 2016 | 0.885488 | 0.844042 |
| Northern Mariana Islands | 2017 | 0.888524 | 0.842979 |
| Northern Mariana Islands | 2018 | 0.887991 | 0.841535 |
| Northern Mariana Islands | 2019 | 0.885281 | 0.840043 |
| Norway                   | 1990 | 0.75453  | 0.444114 |
| Norway                   | 1991 | 0.76261  | 0.443497 |
| Norway                   | 1992 | 0.753197 | 0.43253  |
| Norway                   | 1993 | 0.762236 | 0.431351 |
| Norway                   | 1994 | 0.781039 | 0.438624 |
| Norway                   | 1995 | 0.763202 | 0.424597 |

|        |      |          |          |
|--------|------|----------|----------|
| Norway | 1996 | 0.758874 | 0.419658 |
| Norway | 1997 | 0.75473  | 0.412952 |
| Norway | 1998 | 0.774382 | 0.420472 |
| Norway | 1999 | 0.804349 | 0.433843 |
| Norway | 2000 | 0.825601 | 0.441517 |
| Norway | 2001 | 0.853106 | 0.453431 |
| Norway | 2002 | 0.867374 | 0.459636 |
| Norway | 2003 | 0.880328 | 0.464835 |
| Norway | 2004 | 0.889531 | 0.470566 |
| Norway | 2005 | 0.89659  | 0.476656 |
| Norway | 2006 | 0.922606 | 0.490047 |
| Norway | 2007 | 0.907665 | 0.483353 |
| Norway | 2008 | 0.911053 | 0.485221 |
| Norway | 2009 | 0.928439 | 0.497259 |
| Norway | 2010 | 0.935386 | 0.504449 |
| Norway | 2011 | 0.92996  | 0.505624 |
| Norway | 2012 | 0.945872 | 0.517948 |
| Norway | 2013 | 0.94377  | 0.523526 |
| Norway | 2014 | 0.921463 | 0.517737 |
| Norway | 2015 | 0.916327 | 0.521282 |
| Norway | 2016 | 0.921739 | 0.532769 |
| Norway | 2017 | 0.936924 | 0.549344 |
| Norway | 2018 | 0.918215 | 0.550188 |
| Norway | 2019 | 0.878137 | 0.537045 |
| Oman   | 1990 | 0.979395 | 0.855588 |

|      |      |          |          |
|------|------|----------|----------|
| Oman | 1991 | 0.973416 | 0.875397 |
| Oman | 1992 | 0.949128 | 0.87044  |
| Oman | 1993 | 0.928445 | 0.864161 |
| Oman | 1994 | 0.918156 | 0.861888 |
| Oman | 1995 | 0.904759 | 0.858133 |
| Oman | 1996 | 0.87801  | 0.851048 |
| Oman | 1997 | 0.854061 | 0.839597 |
| Oman | 1998 | 0.840761 | 0.832031 |
| Oman | 1999 | 0.837351 | 0.831819 |
| Oman | 2000 | 0.834719 | 0.835971 |
| Oman | 2001 | 0.827618 | 0.842637 |
| Oman | 2002 | 0.836788 | 0.865047 |
| Oman | 2003 | 0.845547 | 0.873422 |
| Oman | 2004 | 0.855899 | 0.869597 |
| Oman | 2005 | 0.876488 | 0.894328 |
| Oman | 2006 | 0.881398 | 0.931667 |
| Oman | 2007 | 0.83088  | 0.881098 |
| Oman | 2008 | 0.794738 | 0.829971 |
| Oman | 2009 | 0.813201 | 0.848894 |
| Oman | 2010 | 0.846076 | 0.885023 |
| Oman | 2011 | 0.828041 | 0.880499 |
| Oman | 2012 | 0.795644 | 0.823064 |
| Oman | 2013 | 0.786745 | 0.844324 |
| Oman | 2014 | 0.832188 | 0.90246  |
| Oman | 2015 | 0.831518 | 0.871769 |



|          |      |          |          |
|----------|------|----------|----------|
| Oman     | 2016 | 0.822027 | 0.839947 |
| Oman     | 2017 | 0.850428 | 0.847046 |
| Oman     | 2018 | 0.903009 | 0.894798 |
| Oman     | 2019 | 0.928841 | 0.907248 |
| Pakistan | 1990 | 0.769579 | 0.859356 |
| Pakistan | 1991 | 0.77647  | 0.861193 |
| Pakistan | 1992 | 0.790828 | 0.870807 |
| Pakistan | 1993 | 0.795747 | 0.870075 |
| Pakistan | 1994 | 0.805727 | 0.87484  |
| Pakistan | 1995 | 0.818759 | 0.883548 |
| Pakistan | 1996 | 0.825433 | 0.884969 |
| Pakistan | 1997 | 0.83398  | 0.887684 |
| Pakistan | 1998 | 0.842863 | 0.891115 |
| Pakistan | 1999 | 0.855256 | 0.899086 |
| Pakistan | 2000 | 0.86957  | 0.91118  |
| Pakistan | 2001 | 0.872852 | 0.911187 |
| Pakistan | 2002 | 0.871058 | 0.904883 |
| Pakistan | 2003 | 0.880193 | 0.910245 |
| Pakistan | 2004 | 0.877101 | 0.904079 |
| Pakistan | 2005 | 0.872892 | 0.897924 |
| Pakistan | 2006 | 0.872655 | 0.894325 |
| Pakistan | 2007 | 0.872149 | 0.891288 |
| Pakistan | 2008 | 0.875317 | 0.890402 |
| Pakistan | 2009 | 0.878341 | 0.890376 |
| Pakistan | 2010 | 0.878473 | 0.888904 |

|          |      |          |          |
|----------|------|----------|----------|
| Pakistan | 2011 | 0.877758 | 0.884423 |
| Pakistan | 2012 | 0.873696 | 0.878442 |
| Pakistan | 2013 | 0.883067 | 0.885333 |
| Pakistan | 2014 | 0.882844 | 0.883889 |
| Pakistan | 2015 | 0.881913 | 0.881605 |
| Pakistan | 2016 | 0.881354 | 0.879779 |
| Pakistan | 2017 | 0.883992 | 0.881982 |
| Pakistan | 2018 | 0.88619  | 0.884133 |
| Pakistan | 2019 | 0.889084 | 0.887167 |
| Palau    | 1990 | 0.590726 | 0.567074 |
| Palau    | 1991 | 0.592484 | 0.570484 |
| Palau    | 1992 | 0.597138 | 0.577494 |
| Palau    | 1993 | 0.598439 | 0.583652 |
| Palau    | 1994 | 0.607683 | 0.594125 |
| Palau    | 1995 | 0.602122 | 0.598155 |
| Palau    | 1996 | 0.594922 | 0.602471 |
| Palau    | 1997 | 0.583794 | 0.605164 |
| Palau    | 1998 | 0.569959 | 0.607432 |
| Palau    | 1999 | 0.552715 | 0.606219 |
| Palau    | 2000 | 0.535765 | 0.600872 |
| Palau    | 2001 | 0.527349 | 0.594391 |
| Palau    | 2002 | 0.528002 | 0.591384 |
| Palau    | 2003 | 0.527773 | 0.584654 |
| Palau    | 2004 | 0.551456 | 0.599923 |
| Palau    | 2005 | 0.561114 | 0.60323  |

|           |      |          |          |
|-----------|------|----------|----------|
| Palau     | 2006 | 0.560422 | 0.591128 |
| Palau     | 2007 | 0.553735 | 0.574366 |
| Palau     | 2008 | 0.548002 | 0.561176 |
| Palau     | 2009 | 0.544165 | 0.552275 |
| Palau     | 2010 | 0.540527 | 0.545934 |
| Palau     | 2011 | 0.537092 | 0.540225 |
| Palau     | 2012 | 0.533922 | 0.535625 |
| Palau     | 2013 | 0.533608 | 0.534197 |
| Palau     | 2014 | 0.531007 | 0.530978 |
| Palau     | 2015 | 0.529723 | 0.529574 |
| Palau     | 2016 | 0.529932 | 0.529197 |
| Palau     | 2017 | 0.533105 | 0.531537 |
| Palau     | 2018 | 0.535611 | 0.532533 |
| Palau     | 2019 | 0.538439 | 0.532765 |
| Palestine | 1990 | 1.096766 | 0.844508 |
| Palestine | 1991 | 1.091591 | 0.837304 |
| Palestine | 1992 | 1.084402 | 0.829288 |
| Palestine | 1993 | 1.079099 | 0.822787 |
| Palestine | 1994 | 1.078678 | 0.820767 |
| Palestine | 1995 | 1.07913  | 0.819914 |
| Palestine | 1996 | 1.078497 | 0.818714 |
| Palestine | 1997 | 1.046346 | 0.793599 |
| Palestine | 1998 | 1.00854  | 0.764127 |
| Palestine | 1999 | 0.968609 | 0.734114 |
| Palestine | 2000 | 0.941176 | 0.712675 |

|           |      |          |          |
|-----------|------|----------|----------|
| Palestine | 2001 | 0.911024 | 0.687406 |
| Palestine | 2002 | 0.883868 | 0.663667 |
| Palestine | 2003 | 0.868165 | 0.64945  |
| Palestine | 2004 | 0.866073 | 0.644743 |
| Palestine | 2005 | 0.862481 | 0.641533 |
| Palestine | 2006 | 0.86778  | 0.645021 |
| Palestine | 2007 | 0.888549 | 0.660241 |
| Palestine | 2008 | 0.918877 | 0.687188 |
| Palestine | 2009 | 0.938756 | 0.70351  |
| Palestine | 2010 | 0.97194  | 0.724081 |
| Palestine | 2011 | 0.972628 | 0.724938 |
| Palestine | 2012 | 0.957763 | 0.721228 |
| Palestine | 2013 | 0.962405 | 0.732859 |
| Palestine | 2014 | 0.945347 | 0.721619 |
| Palestine | 2015 | 0.981757 | 0.74991  |
| Palestine | 2016 | 1.030033 | 0.788183 |
| Palestine | 2017 | 1.031354 | 0.790637 |
| Palestine | 2018 | 1.009338 | 0.781943 |
| Palestine | 2019 | 1.007945 | 0.795501 |
| Panama    | 1990 | 0.684806 | 0.673883 |
| Panama    | 1991 | 0.662354 | 0.648572 |
| Panama    | 1992 | 0.682867 | 0.663984 |
| Panama    | 1993 | 0.622521 | 0.60272  |
| Panama    | 1994 | 0.632837 | 0.60781  |
| Panama    | 1995 | 0.609146 | 0.578484 |

|                  |      |          |          |
|------------------|------|----------|----------|
| Panama           | 1996 | 0.649564 | 0.611483 |
| Panama           | 1997 | 0.695155 | 0.650684 |
| Panama           | 1998 | 0.755965 | 0.707313 |
| Panama           | 1999 | 0.726618 | 0.67976  |
| Panama           | 2000 | 0.755907 | 0.704044 |
| Panama           | 2001 | 0.753036 | 0.698864 |
| Panama           | 2002 | 0.744099 | 0.687659 |
| Panama           | 2003 | 0.745748 | 0.685298 |
| Panama           | 2004 | 0.776886 | 0.713745 |
| Panama           | 2005 | 0.74812  | 0.688865 |
| Panama           | 2006 | 0.721141 | 0.662738 |
| Panama           | 2007 | 0.704199 | 0.645755 |
| Panama           | 2008 | 0.673904 | 0.615725 |
| Panama           | 2009 | 0.672603 | 0.61248  |
| Panama           | 2010 | 0.660371 | 0.597237 |
| Panama           | 2011 | 0.680747 | 0.613704 |
| Panama           | 2012 | 0.671265 | 0.603026 |
| Panama           | 2013 | 0.709723 | 0.637278 |
| Panama           | 2014 | 0.703626 | 0.631    |
| Panama           | 2015 | 0.696567 | 0.623082 |
| Panama           | 2016 | 0.695587 | 0.620452 |
| Panama           | 2017 | 0.686796 | 0.611485 |
| Panama           | 2018 | 0.70711  | 0.629843 |
| Panama           | 2019 | 0.702706 | 0.625932 |
| Papua New Guinea | 1990 | 0.510353 | 0.520489 |

|                  |      |          |          |
|------------------|------|----------|----------|
| Papua New Guinea | 1991 | 0.507586 | 0.517922 |
| Papua New Guinea | 1992 | 0.507342 | 0.516734 |
| Papua New Guinea | 1993 | 0.505816 | 0.514488 |
| Papua New Guinea | 1994 | 0.504687 | 0.513087 |
| Papua New Guinea | 1995 | 0.503742 | 0.512226 |
| Papua New Guinea | 1996 | 0.507201 | 0.51616  |
| Papua New Guinea | 1997 | 0.510876 | 0.518938 |
| Papua New Guinea | 1998 | 0.51547  | 0.522528 |
| Papua New Guinea | 1999 | 0.518813 | 0.525667 |
| Papua New Guinea | 2000 | 0.520481 | 0.527957 |
| Papua New Guinea | 2001 | 0.520252 | 0.52839  |
| Papua New Guinea | 2002 | 0.521909 | 0.529584 |
| Papua New Guinea | 2003 | 0.522595 | 0.530408 |
| Papua New Guinea | 2004 | 0.523892 | 0.532711 |
| Papua New Guinea | 2005 | 0.520392 | 0.530805 |
| Papua New Guinea | 2006 | 0.522667 | 0.534894 |
| Papua New Guinea | 2007 | 0.521963 | 0.535709 |
| Papua New Guinea | 2008 | 0.515748 | 0.531163 |
| Papua New Guinea | 2009 | 0.51058  | 0.528153 |
| Papua New Guinea | 2010 | 0.50998  | 0.528219 |
| Papua New Guinea | 2011 | 0.504127 | 0.522987 |
| Papua New Guinea | 2012 | 0.499902 | 0.520138 |
| Papua New Guinea | 2013 | 0.494541 | 0.517163 |
| Papua New Guinea | 2014 | 0.490763 | 0.51518  |
| Papua New Guinea | 2015 | 0.490012 | 0.516154 |

|                  |      |          |          |
|------------------|------|----------|----------|
| Papua New Guinea | 2016 | 0.488799 | 0.517054 |
| Papua New Guinea | 2017 | 0.489673 | 0.518489 |
| Papua New Guinea | 2018 | 0.488274 | 0.517236 |
| Papua New Guinea | 2019 | 0.487062 | 0.516906 |
| Paraguay         | 1990 | 0.87285  | 0.733251 |
| Paraguay         | 1991 | 0.871421 | 0.73538  |
| Paraguay         | 1992 | 0.861984 | 0.731253 |
| Paraguay         | 1993 | 0.893227 | 0.763558 |
| Paraguay         | 1994 | 0.874891 | 0.750756 |
| Paraguay         | 1995 | 0.891905 | 0.767908 |
| Paraguay         | 1996 | 0.894482 | 0.771026 |
| Paraguay         | 1997 | 0.90991  | 0.786707 |
| Paraguay         | 1998 | 0.891224 | 0.772082 |
| Paraguay         | 1999 | 0.892023 | 0.776159 |
| Paraguay         | 2000 | 0.908794 | 0.790837 |
| Paraguay         | 2001 | 0.900237 | 0.782912 |
| Paraguay         | 2002 | 0.900709 | 0.784708 |
| Paraguay         | 2003 | 0.899833 | 0.784946 |
| Paraguay         | 2004 | 0.905188 | 0.78769  |
| Paraguay         | 2005 | 0.906572 | 0.78923  |
| Paraguay         | 2006 | 0.919604 | 0.800699 |
| Paraguay         | 2007 | 0.895242 | 0.778963 |
| Paraguay         | 2008 | 0.8998   | 0.782922 |
| Paraguay         | 2009 | 0.887053 | 0.770607 |
| Paraguay         | 2010 | 0.889014 | 0.769331 |

|          |      |          |          |
|----------|------|----------|----------|
| Paraguay | 2011 | 0.893574 | 0.772361 |
| Paraguay | 2012 | 0.880004 | 0.758167 |
| Paraguay | 2013 | 0.894597 | 0.76836  |
| Paraguay | 2014 | 0.863302 | 0.743413 |
| Paraguay | 2015 | 0.829355 | 0.715781 |
| Paraguay | 2016 | 0.841111 | 0.72518  |
| Paraguay | 2017 | 0.843696 | 0.726201 |
| Paraguay | 2018 | 0.843366 | 0.725494 |
| Paraguay | 2019 | 0.836684 | 0.71842  |
| Peru     | 1990 | 0.913601 | 0.863955 |
| Peru     | 1991 | 1.00472  | 0.948777 |
| Peru     | 1992 | 1.044879 | 0.98688  |
| Peru     | 1993 | 1.027759 | 0.970272 |
| Peru     | 1994 | 1.115356 | 1.054376 |
| Peru     | 1995 | 1.156215 | 1.097468 |
| Peru     | 1996 | 1.083906 | 1.03572  |
| Peru     | 1997 | 1.079265 | 1.033944 |
| Peru     | 1998 | 1.084938 | 1.038903 |
| Peru     | 1999 | 1.053269 | 1.008394 |
| Peru     | 2000 | 1.05003  | 1.00284  |
| Peru     | 2001 | 1.015949 | 0.966888 |
| Peru     | 2002 | 1.021084 | 0.968834 |
| Peru     | 2003 | 1.050852 | 0.995309 |
| Peru     | 2004 | 1.010514 | 0.953906 |
| Peru     | 2005 | 1.011217 | 0.949196 |



|             |      |          |          |
|-------------|------|----------|----------|
| Peru        | 2006 | 0.971567 | 0.907069 |
| Peru        | 2007 | 0.93459  | 0.868534 |
| Peru        | 2008 | 0.964408 | 0.891577 |
| Peru        | 2009 | 1.005513 | 0.925821 |
| Peru        | 2010 | 1.016288 | 0.931538 |
| Peru        | 2011 | 1.030177 | 0.940505 |
| Peru        | 2012 | 1.051711 | 0.956412 |
| Peru        | 2013 | 1.058485 | 0.95881  |
| Peru        | 2014 | 1.067343 | 0.963477 |
| Peru        | 2015 | 1.06634  | 0.959772 |
| Peru        | 2016 | 1.074129 | 0.96437  |
| Peru        | 2017 | 1.089316 | 0.975806 |
| Peru        | 2018 | 1.098656 | 0.982166 |
| Peru        | 2019 | 1.110745 | 0.990734 |
| Philippines | 1990 | 0.895381 | 0.902283 |
| Philippines | 1991 | 0.880509 | 0.883263 |
| Philippines | 1992 | 0.881702 | 0.876569 |
| Philippines | 1993 | 0.877133 | 0.864402 |
| Philippines | 1994 | 0.86956  | 0.85266  |
| Philippines | 1995 | 0.87258  | 0.852439 |
| Philippines | 1996 | 0.866278 | 0.838327 |
| Philippines | 1997 | 0.8542   | 0.812544 |
| Philippines | 1998 | 0.847416 | 0.798709 |
| Philippines | 1999 | 0.848855 | 0.801611 |
| Philippines | 2000 | 0.854486 | 0.804787 |

|             |      |          |          |
|-------------|------|----------|----------|
| Philippines | 2001 | 0.854201 | 0.80103  |
| Philippines | 2002 | 0.85769  | 0.80353  |
| Philippines | 2003 | 0.847201 | 0.792661 |
| Philippines | 2004 | 0.843162 | 0.788747 |
| Philippines | 2005 | 0.841734 | 0.787366 |
| Philippines | 2006 | 0.834808 | 0.780353 |
| Philippines | 2007 | 0.832589 | 0.775666 |
| Philippines | 2008 | 0.838592 | 0.777601 |
| Philippines | 2009 | 0.835108 | 0.770345 |
| Philippines | 2010 | 0.829964 | 0.764372 |
| Philippines | 2011 | 0.827424 | 0.758476 |
| Philippines | 2012 | 0.838945 | 0.763847 |
| Philippines | 2013 | 0.85046  | 0.770959 |
| Philippines | 2014 | 0.840941 | 0.760785 |
| Philippines | 2015 | 0.845221 | 0.761678 |
| Philippines | 2016 | 0.843903 | 0.758905 |
| Philippines | 2017 | 0.852911 | 0.768268 |
| Philippines | 2018 | 0.858187 | 0.773633 |
| Philippines | 2019 | 0.859915 | 0.775107 |
| Poland      | 1990 | 0.917881 | 0.594086 |
| Poland      | 1991 | 0.90409  | 0.580834 |
| Poland      | 1992 | 0.919908 | 0.58486  |
| Poland      | 1993 | 0.946987 | 0.594748 |
| Poland      | 1994 | 0.960281 | 0.600366 |
| Poland      | 1995 | 0.958064 | 0.595011 |

|          |      |          |          |
|----------|------|----------|----------|
| Poland   | 1996 | 0.985587 | 0.604305 |
| Poland   | 1997 | 0.999282 | 0.608044 |
| Poland   | 1998 | 1.016292 | 0.611599 |
| Poland   | 1999 | 1.025894 | 0.611673 |
| Poland   | 2000 | 1.053107 | 0.615915 |
| Poland   | 2001 | 1.045756 | 0.604648 |
| Poland   | 2002 | 1.042927 | 0.59748  |
| Poland   | 2003 | 1.038911 | 0.591794 |
| Poland   | 2004 | 1.041969 | 0.592438 |
| Poland   | 2005 | 1.070954 | 0.608519 |
| Poland   | 2006 | 1.101807 | 0.627874 |
| Poland   | 2007 | 1.126684 | 0.643817 |
| Poland   | 2008 | 1.09441  | 0.626611 |
| Poland   | 2009 | 1.086273 | 0.622186 |
| Poland   | 2010 | 1.050341 | 0.600421 |
| Poland   | 2011 | 1.022768 | 0.5837   |
| Poland   | 2012 | 1.045657 | 0.594587 |
| Poland   | 2013 | 1.06034  | 0.600538 |
| Poland   | 2014 | 1.095376 | 0.617875 |
| Poland   | 2015 | 1.090725 | 0.612589 |
| Poland   | 2016 | 1.085856 | 0.609823 |
| Poland   | 2017 | 1.063426 | 0.59996  |
| Poland   | 2018 | 1.053713 | 0.59652  |
| Poland   | 2019 | 1.043147 | 0.59288  |
| Portugal | 1990 | 0.884262 | 0.543926 |

|          |      |          |          |
|----------|------|----------|----------|
| Portugal | 1991 | 0.890398 | 0.549614 |
| Portugal | 1992 | 0.887748 | 0.548645 |
| Portugal | 1993 | 0.905257 | 0.559067 |
| Portugal | 1994 | 0.934888 | 0.578709 |
| Portugal | 1995 | 0.954761 | 0.593079 |
| Portugal | 1996 | 0.955694 | 0.595236 |
| Portugal | 1997 | 0.983491 | 0.612126 |
| Portugal | 1998 | 0.9847   | 0.611874 |
| Portugal | 1999 | 0.994401 | 0.611865 |
| Portugal | 2000 | 1.014619 | 0.622443 |
| Portugal | 2001 | 1.023922 | 0.627747 |
| Portugal | 2002 | 1.046333 | 0.641815 |
| Portugal | 2003 | 1.071809 | 0.658259 |
| Portugal | 2004 | 1.082705 | 0.665587 |
| Portugal | 2005 | 1.100718 | 0.675084 |
| Portugal | 2006 | 1.117627 | 0.682107 |
| Portugal | 2007 | 1.12877  | 0.685484 |
| Portugal | 2008 | 1.135725 | 0.684655 |
| Portugal | 2009 | 1.158093 | 0.693652 |
| Portugal | 2010 | 1.181695 | 0.701173 |
| Portugal | 2011 | 1.212089 | 0.712886 |
| Portugal | 2012 | 1.214154 | 0.709169 |
| Portugal | 2013 | 1.223854 | 0.710161 |
| Portugal | 2014 | 1.23894  | 0.71278  |
| Portugal | 2015 | 1.253346 | 0.718468 |

|             |      |          |          |
|-------------|------|----------|----------|
| Portugal    | 2016 | 1.250497 | 0.714503 |
| Portugal    | 2017 | 1.242519 | 0.710662 |
| Portugal    | 2018 | 1.247566 | 0.715337 |
| Portugal    | 2019 | 1.242236 | 0.713636 |
| Puerto Rico | 1990 | 0.80275  | 0.669891 |
| Puerto Rico | 1991 | 0.809018 | 0.669491 |
| Puerto Rico | 1992 | 0.805713 | 0.661874 |
| Puerto Rico | 1993 | 0.80907  | 0.659305 |
| Puerto Rico | 1994 | 0.823879 | 0.665447 |
| Puerto Rico | 1995 | 0.795614 | 0.637683 |
| Puerto Rico | 1996 | 0.821616 | 0.653485 |
| Puerto Rico | 1997 | 0.806042 | 0.636572 |
| Puerto Rico | 1998 | 0.783507 | 0.61465  |
| Puerto Rico | 1999 | 0.830368 | 0.646628 |
| Puerto Rico | 2000 | 0.847044 | 0.655127 |
| Puerto Rico | 2001 | 0.813541 | 0.623902 |
| Puerto Rico | 2002 | 0.837027 | 0.636125 |
| Puerto Rico | 2003 | 0.849227 | 0.641471 |
| Puerto Rico | 2004 | 0.851207 | 0.638502 |
| Puerto Rico | 2005 | 0.819532 | 0.609731 |
| Puerto Rico | 2006 | 0.828059 | 0.610677 |
| Puerto Rico | 2007 | 0.851411 | 0.623053 |
| Puerto Rico | 2008 | 0.870717 | 0.634801 |
| Puerto Rico | 2009 | 0.835635 | 0.606872 |
| Puerto Rico | 2010 | 0.873679 | 0.632793 |

|             |      |          |          |
|-------------|------|----------|----------|
| Puerto Rico | 2011 | 0.865857 | 0.627258 |
| Puerto Rico | 2012 | 0.864947 | 0.620861 |
| Puerto Rico | 2013 | 0.87645  | 0.628923 |
| Puerto Rico | 2014 | 0.887603 | 0.635695 |
| Puerto Rico | 2015 | 0.868531 | 0.617416 |
| Puerto Rico | 2016 | 0.888741 | 0.631972 |
| Puerto Rico | 2017 | 0.888622 | 0.629582 |
| Puerto Rico | 2018 | 0.911225 | 0.642743 |
| Puerto Rico | 2019 | 0.924823 | 0.650285 |
| Qatar       | 1990 | 0.952955 | 1.265583 |
| Qatar       | 1991 | 0.901362 | 1.196006 |
| Qatar       | 1992 | 0.878474 | 1.194201 |
| Qatar       | 1993 | 0.898298 | 1.317721 |
| Qatar       | 1994 | 0.910554 | 1.544928 |
| Qatar       | 1995 | 0.875373 | 1.597969 |
| Qatar       | 1996 | 0.813587 | 1.370316 |
| Qatar       | 1997 | 0.763374 | 1.260175 |
| Qatar       | 1998 | 0.741687 | 1.250523 |
| Qatar       | 1999 | 0.752939 | 1.33758  |
| Qatar       | 2000 | 0.763105 | 1.470088 |
| Qatar       | 2001 | 0.776966 | 1.566502 |
| Qatar       | 2002 | 0.775655 | 1.635752 |
| Qatar       | 2003 | 0.76026  | 1.672719 |
| Qatar       | 2004 | 0.769387 | 1.81363  |
| Qatar       | 2005 | 0.780175 | 1.889947 |

|                   |      |          |          |
|-------------------|------|----------|----------|
| Qatar             | 2006 | 0.75546  | 1.899169 |
| Qatar             | 2007 | 0.740074 | 1.926302 |
| Qatar             | 2008 | 0.708016 | 1.953539 |
| Qatar             | 2009 | 0.686412 | 2.077397 |
| Qatar             | 2010 | 0.675395 | 2.109451 |
| Qatar             | 2011 | 0.652704 | 2.009032 |
| Qatar             | 2012 | 0.635437 | 1.934902 |
| Qatar             | 2013 | 0.645644 | 1.98802  |
| Qatar             | 2014 | 0.649426 | 1.950938 |
| Qatar             | 2015 | 0.59925  | 1.734004 |
| Qatar             | 2016 | 0.609361 | 1.770803 |
| Qatar             | 2017 | 0.624812 | 1.811416 |
| Qatar             | 2018 | 0.631227 | 1.877501 |
| Qatar             | 2019 | 0.623123 | 1.904559 |
| Republic of Korea | 1990 | 0.857258 | 0.549206 |
| Republic of Korea | 1991 | 0.875952 | 0.551973 |
| Republic of Korea | 1992 | 0.905363 | 0.563273 |
| Republic of Korea | 1993 | 0.922645 | 0.569835 |
| Republic of Korea | 1994 | 0.927687 | 0.567936 |
| Republic of Korea | 1995 | 0.968644 | 0.600595 |
| Republic of Korea | 1996 | 0.983011 | 0.618658 |
| Republic of Korea | 1997 | 1.005261 | 0.628044 |
| Republic of Korea | 1998 | 1.022196 | 0.634332 |
| Republic of Korea | 1999 | 1.047436 | 0.6421   |
| Republic of Korea | 2000 | 1.072308 | 0.652147 |

|                     |      |          |          |
|---------------------|------|----------|----------|
| Republic of Korea   | 2001 | 1.084258 | 0.656648 |
| Republic of Korea   | 2002 | 1.098332 | 0.660852 |
| Republic of Korea   | 2003 | 1.097612 | 0.658917 |
| Republic of Korea   | 2004 | 1.07524  | 0.647505 |
| Republic of Korea   | 2005 | 1.071843 | 0.64214  |
| Republic of Korea   | 2006 | 1.053906 | 0.631558 |
| Republic of Korea   | 2007 | 1.044885 | 0.623151 |
| Republic of Korea   | 2008 | 1.029952 | 0.613718 |
| Republic of Korea   | 2009 | 1.024996 | 0.609758 |
| Republic of Korea   | 2010 | 1.018097 | 0.600666 |
| Republic of Korea   | 2011 | 1.014423 | 0.595254 |
| Republic of Korea   | 2012 | 1.014457 | 0.594651 |
| Republic of Korea   | 2013 | 1.016761 | 0.598625 |
| Republic of Korea   | 2014 | 1.009222 | 0.597557 |
| Republic of Korea   | 2015 | 1.013167 | 0.598706 |
| Republic of Korea   | 2016 | 1.015444 | 0.601958 |
| Republic of Korea   | 2017 | 1.00616  | 0.602647 |
| Republic of Korea   | 2018 | 1.025879 | 0.621714 |
| Republic of Korea   | 2019 | 1.022686 | 0.625971 |
| Republic of Moldova | 1990 | 0.848599 | 0.515396 |
| Republic of Moldova | 1991 | 0.818752 | 0.511245 |
| Republic of Moldova | 1992 | 0.812354 | 0.508411 |
| Republic of Moldova | 1993 | 0.824758 | 0.520016 |
| Republic of Moldova | 1994 | 0.758844 | 0.496269 |
| Republic of Moldova | 1995 | 0.723716 | 0.482553 |



|                     |      |          |          |
|---------------------|------|----------|----------|
| Republic of Moldova | 1996 | 0.715793 | 0.47752  |
| Republic of Moldova | 1997 | 0.74865  | 0.492646 |
| Republic of Moldova | 1998 | 0.729586 | 0.478633 |
| Republic of Moldova | 1999 | 0.75475  | 0.494013 |
| Republic of Moldova | 2000 | 0.786413 | 0.514092 |
| Republic of Moldova | 2001 | 0.805144 | 0.526969 |
| Republic of Moldova | 2002 | 0.881436 | 0.580425 |
| Republic of Moldova | 2003 | 0.920664 | 0.606418 |
| Republic of Moldova | 2004 | 0.883634 | 0.573869 |
| Republic of Moldova | 2005 | 0.825192 | 0.541935 |
| Republic of Moldova | 2006 | 0.878413 | 0.571388 |
| Republic of Moldova | 2007 | 0.941002 | 0.612718 |
| Republic of Moldova | 2008 | 0.957584 | 0.626718 |
| Republic of Moldova | 2009 | 0.965352 | 0.637306 |
| Republic of Moldova | 2010 | 0.955516 | 0.637033 |
| Republic of Moldova | 2011 | 0.986443 | 0.647917 |
| Republic of Moldova | 2012 | 1.008266 | 0.659343 |
| Republic of Moldova | 2013 | 1.062256 | 0.694627 |
| Republic of Moldova | 2014 | 1.059157 | 0.69576  |
| Republic of Moldova | 2015 | 1.00229  | 0.644196 |
| Republic of Moldova | 2016 | 1.059686 | 0.666742 |
| Republic of Moldova | 2017 | 1.114566 | 0.69188  |
| Republic of Moldova | 2018 | 1.082026 | 0.672992 |
| Republic of Moldova | 2019 | 1.044547 | 0.651103 |
| Romania             | 1990 | 1.079553 | 0.866268 |

|         |      |          |          |
|---------|------|----------|----------|
| Romania | 1991 | 1.086222 | 0.862351 |
| Romania | 1992 | 1.046153 | 0.826138 |
| Romania | 1993 | 1.029617 | 0.80953  |
| Romania | 1994 | 1.012606 | 0.792177 |
| Romania | 1995 | 1.000688 | 0.777709 |
| Romania | 1996 | 0.983609 | 0.758064 |
| Romania | 1997 | 0.959848 | 0.733464 |
| Romania | 1998 | 0.981335 | 0.736681 |
| Romania | 1999 | 0.997782 | 0.738726 |
| Romania | 2000 | 0.994107 | 0.73164  |
| Romania | 2001 | 0.956077 | 0.70287  |
| Romania | 2002 | 0.951443 | 0.694438 |
| Romania | 2003 | 0.945295 | 0.685769 |
| Romania | 2004 | 0.936806 | 0.672382 |
| Romania | 2005 | 0.962369 | 0.686111 |
| Romania | 2006 | 0.981261 | 0.695823 |
| Romania | 2007 | 1.005379 | 0.708652 |
| Romania | 2008 | 0.989066 | 0.694823 |
| Romania | 2009 | 0.998743 | 0.697203 |
| Romania | 2010 | 0.99074  | 0.686144 |
| Romania | 2011 | 1.001066 | 0.685511 |
| Romania | 2012 | 0.997056 | 0.677662 |
| Romania | 2013 | 1.01578  | 0.685032 |
| Romania | 2014 | 1.005041 | 0.674832 |
| Romania | 2015 | 1.007222 | 0.673017 |

|                    |      |          |          |
|--------------------|------|----------|----------|
| Romania            | 2016 | 1.00319  | 0.668504 |
| Romania            | 2017 | 1.008839 | 0.671674 |
| Romania            | 2018 | 1.002935 | 0.667179 |
| Romania            | 2019 | 1.007882 | 0.667713 |
| Russian Federation | 1990 | 1.237604 | 0.690445 |
| Russian Federation | 1991 | 1.240021 | 0.696266 |
| Russian Federation | 1992 | 1.175419 | 0.674369 |
| Russian Federation | 1993 | 1.095619 | 0.649003 |
| Russian Federation | 1994 | 1.066959 | 0.643526 |
| Russian Federation | 1995 | 1.088154 | 0.651418 |
| Russian Federation | 1996 | 1.13313  | 0.665031 |
| Russian Federation | 1997 | 1.192142 | 0.685413 |
| Russian Federation | 1998 | 1.203965 | 0.68899  |
| Russian Federation | 1999 | 1.163027 | 0.676473 |
| Russian Federation | 2000 | 1.12748  | 0.660553 |
| Russian Federation | 2001 | 1.143098 | 0.666437 |
| Russian Federation | 2002 | 1.151992 | 0.668583 |
| Russian Federation | 2003 | 1.154748 | 0.670397 |
| Russian Federation | 2004 | 1.162412 | 0.672801 |
| Russian Federation | 2005 | 1.157706 | 0.672401 |
| Russian Federation | 2006 | 1.19925  | 0.68176  |
| Russian Federation | 2007 | 1.232211 | 0.690174 |
| Russian Federation | 2008 | 1.223246 | 0.681691 |
| Russian Federation | 2009 | 1.255663 | 0.690114 |
| Russian Federation | 2010 | 1.250566 | 0.683559 |

|                    |      |          |          |
|--------------------|------|----------|----------|
| Russian Federation | 2011 | 1.286702 | 0.694845 |
| Russian Federation | 2012 | 1.295215 | 0.692835 |
| Russian Federation | 2013 | 1.305034 | 0.693218 |
| Russian Federation | 2014 | 1.302006 | 0.689733 |
| Russian Federation | 2015 | 1.334409 | 0.703311 |
| Russian Federation | 2016 | 1.344511 | 0.707135 |
| Russian Federation | 2017 | 1.394103 | 0.731382 |
| Russian Federation | 2018 | 1.394549 | 0.735282 |
| Russian Federation | 2019 | 1.381232 | 0.732034 |
| Rwanda             | 1990 | 0.824395 | 0.650032 |
| Rwanda             | 1991 | 0.81081  | 0.639775 |
| Rwanda             | 1992 | 0.782385 | 0.617991 |
| Rwanda             | 1993 | 0.760105 | 0.601291 |
| Rwanda             | 1994 | 0.756358 | 0.581929 |
| Rwanda             | 1995 | 0.759429 | 0.566516 |
| Rwanda             | 1996 | 0.759521 | 0.566825 |
| Rwanda             | 1997 | 0.765052 | 0.5693   |
| Rwanda             | 1998 | 0.787475 | 0.580555 |
| Rwanda             | 1999 | 0.816803 | 0.597427 |
| Rwanda             | 2000 | 0.829663 | 0.603649 |
| Rwanda             | 2001 | 0.843068 | 0.611413 |
| Rwanda             | 2002 | 0.852925 | 0.615855 |
| Rwanda             | 2003 | 0.865838 | 0.623707 |
| Rwanda             | 2004 | 0.873066 | 0.62669  |
| Rwanda             | 2005 | 0.876651 | 0.629256 |

|                       |      |          |          |
|-----------------------|------|----------|----------|
| Rwanda                | 2006 | 0.874617 | 0.628897 |
| Rwanda                | 2007 | 0.878535 | 0.630917 |
| Rwanda                | 2008 | 0.887536 | 0.635571 |
| Rwanda                | 2009 | 0.895936 | 0.641741 |
| Rwanda                | 2010 | 0.908779 | 0.649458 |
| Rwanda                | 2011 | 0.918745 | 0.656101 |
| Rwanda                | 2012 | 0.926945 | 0.661974 |
| Rwanda                | 2013 | 0.939974 | 0.672839 |
| Rwanda                | 2014 | 0.956287 | 0.683731 |
| Rwanda                | 2015 | 0.969773 | 0.693098 |
| Rwanda                | 2016 | 0.978654 | 0.701247 |
| Rwanda                | 2017 | 0.990168 | 0.711922 |
| Rwanda                | 2018 | 0.998336 | 0.721102 |
| Rwanda                | 2019 | 1.006308 | 0.729699 |
| Saint Kitts and Nevis | 1990 | 0.977618 | 0.720692 |
| Saint Kitts and Nevis | 1991 | 0.777526 | 0.583399 |
| Saint Kitts and Nevis | 1992 | 0.785881 | 0.582392 |
| Saint Kitts and Nevis | 1993 | 0.805116 | 0.592521 |
| Saint Kitts and Nevis | 1994 | 0.839028 | 0.608603 |
| Saint Kitts and Nevis | 1995 | 0.876303 | 0.63063  |
| Saint Kitts and Nevis | 1996 | 0.864655 | 0.621258 |
| Saint Kitts and Nevis | 1997 | 0.863032 | 0.618292 |
| Saint Kitts and Nevis | 1998 | 0.870163 | 0.623277 |
| Saint Kitts and Nevis | 1999 | 0.883872 | 0.634954 |
| Saint Kitts and Nevis | 2000 | 0.915314 | 0.659458 |

|                       |      |          |          |
|-----------------------|------|----------|----------|
| Saint Kitts and Nevis | 2001 | 0.928859 | 0.671865 |
| Saint Kitts and Nevis | 2002 | 0.937404 | 0.681404 |
| Saint Kitts and Nevis | 2003 | 0.933207 | 0.684634 |
| Saint Kitts and Nevis | 2004 | 0.939514 | 0.703626 |
| Saint Kitts and Nevis | 2005 | 0.924993 | 0.701387 |
| Saint Kitts and Nevis | 2006 | 0.919201 | 0.70406  |
| Saint Kitts and Nevis | 2007 | 0.915181 | 0.707981 |
| Saint Kitts and Nevis | 2008 | 0.952305 | 0.723867 |
| Saint Kitts and Nevis | 2009 | 0.968373 | 0.732117 |
| Saint Kitts and Nevis | 2010 | 0.954543 | 0.723024 |
| Saint Kitts and Nevis | 2011 | 0.948111 | 0.715818 |
| Saint Kitts and Nevis | 2012 | 0.924673 | 0.698322 |
| Saint Kitts and Nevis | 2013 | 0.918237 | 0.695838 |
| Saint Kitts and Nevis | 2014 | 0.906135 | 0.692654 |
| Saint Kitts and Nevis | 2015 | 0.881642 | 0.680331 |
| Saint Kitts and Nevis | 2016 | 0.867707 | 0.674668 |
| Saint Kitts and Nevis | 2017 | 0.850948 | 0.666632 |
| Saint Kitts and Nevis | 2018 | 0.831812 | 0.66427  |
| Saint Kitts and Nevis | 2019 | 0.750426 | 0.666059 |
| Saint Lucia           | 1990 | 0.820367 | 0.585517 |
| Saint Lucia           | 1991 | 0.834488 | 0.602001 |
| Saint Lucia           | 1992 | 0.850757 | 0.616906 |
| Saint Lucia           | 1993 | 0.849089 | 0.617068 |
| Saint Lucia           | 1994 | 0.839079 | 0.615244 |
| Saint Lucia           | 1995 | 0.835752 | 0.620428 |

|                                  |      |          |          |
|----------------------------------|------|----------|----------|
| Saint Lucia                      | 1996 | 0.802615 | 0.604438 |
| Saint Lucia                      | 1997 | 0.774274 | 0.589376 |
| Saint Lucia                      | 1998 | 0.782389 | 0.602523 |
| Saint Lucia                      | 1999 | 0.790826 | 0.617421 |
| Saint Lucia                      | 2000 | 0.790218 | 0.620439 |
| Saint Lucia                      | 2001 | 0.777224 | 0.604588 |
| Saint Lucia                      | 2002 | 0.758923 | 0.587237 |
| Saint Lucia                      | 2003 | 0.760145 | 0.586709 |
| Saint Lucia                      | 2004 | 0.775105 | 0.596586 |
| Saint Lucia                      | 2005 | 0.798511 | 0.615856 |
| Saint Lucia                      | 2006 | 0.810371 | 0.630761 |
| Saint Lucia                      | 2007 | 0.751768 | 0.58511  |
| Saint Lucia                      | 2008 | 0.741994 | 0.577525 |
| Saint Lucia                      | 2009 | 0.750507 | 0.586573 |
| Saint Lucia                      | 2010 | 0.760554 | 0.601201 |
| Saint Lucia                      | 2011 | 0.809689 | 0.64893  |
| Saint Lucia                      | 2012 | 0.822286 | 0.664903 |
| Saint Lucia                      | 2013 | 0.799342 | 0.645977 |
| Saint Lucia                      | 2014 | 0.801771 | 0.650044 |
| Saint Lucia                      | 2015 | 0.793431 | 0.646977 |
| Saint Lucia                      | 2016 | 0.788999 | 0.642229 |
| Saint Lucia                      | 2017 | 0.784017 | 0.638882 |
| Saint Lucia                      | 2018 | 0.780336 | 0.636198 |
| Saint Lucia                      | 2019 | 0.778887 | 0.635259 |
| Saint Vincent and the Grenadines | 1990 | 1.055811 | 0.779191 |

|                                  |      |          |          |
|----------------------------------|------|----------|----------|
| Saint Vincent and the Grenadines | 1991 | 1.060365 | 0.797731 |
| Saint Vincent and the Grenadines | 1992 | 1.059923 | 0.810912 |
| Saint Vincent and the Grenadines | 1993 | 1.059589 | 0.821744 |
| Saint Vincent and the Grenadines | 1994 | 1.069537 | 0.844344 |
| Saint Vincent and the Grenadines | 1995 | 0.990095 | 0.786788 |
| Saint Vincent and the Grenadines | 1996 | 0.92571  | 0.739108 |
| Saint Vincent and the Grenadines | 1997 | 0.894478 | 0.717007 |
| Saint Vincent and the Grenadines | 1998 | 0.881609 | 0.708572 |
| Saint Vincent and the Grenadines | 1999 | 0.895191 | 0.717596 |
| Saint Vincent and the Grenadines | 2000 | 0.906901 | 0.727819 |
| Saint Vincent and the Grenadines | 2001 | 0.941204 | 0.766283 |
| Saint Vincent and the Grenadines | 2002 | 0.931621 | 0.760813 |
| Saint Vincent and the Grenadines | 2003 | 0.921101 | 0.754886 |
| Saint Vincent and the Grenadines | 2004 | 0.923713 | 0.758606 |
| Saint Vincent and the Grenadines | 2005 | 0.929897 | 0.771784 |
| Saint Vincent and the Grenadines | 2006 | 0.913858 | 0.763832 |
| Saint Vincent and the Grenadines | 2007 | 0.919976 | 0.775243 |
| Saint Vincent and the Grenadines | 2008 | 0.938457 | 0.802308 |
| Saint Vincent and the Grenadines | 2009 | 0.962495 | 0.834135 |
| Saint Vincent and the Grenadines | 2010 | 0.971071 | 0.849322 |
| Saint Vincent and the Grenadines | 2011 | 0.979049 | 0.865898 |
| Saint Vincent and the Grenadines | 2012 | 0.956986 | 0.863578 |
| Saint Vincent and the Grenadines | 2013 | 0.933168 | 0.860723 |
| Saint Vincent and the Grenadines | 2014 | 0.921409 | 0.863582 |
| Saint Vincent and the Grenadines | 2015 | 0.907507 | 0.86158  |



|                                  |      |          |          |
|----------------------------------|------|----------|----------|
| Saint Vincent and the Grenadines | 2016 | 0.873985 | 0.842537 |
| Saint Vincent and the Grenadines | 2017 | 0.859361 | 0.837012 |
| Saint Vincent and the Grenadines | 2018 | 0.845672 | 0.830576 |
| Saint Vincent and the Grenadines | 2019 | 0.833823 | 0.82454  |
| Samoa                            | 1990 | 0.980132 | 0.843734 |
| Samoa                            | 1991 | 1.000796 | 0.860756 |
| Samoa                            | 1992 | 1.023771 | 0.880098 |
| Samoa                            | 1993 | 1.031447 | 0.887633 |
| Samoa                            | 1994 | 1.049276 | 0.904544 |
| Samoa                            | 1995 | 1.068083 | 0.922056 |
| Samoa                            | 1996 | 1.09226  | 0.944345 |
| Samoa                            | 1997 | 1.116858 | 0.967899 |
| Samoa                            | 1998 | 1.143322 | 0.993029 |
| Samoa                            | 1999 | 1.164018 | 1.012467 |
| Samoa                            | 2000 | 1.177392 | 1.024988 |
| Samoa                            | 2001 | 1.172274 | 1.021756 |
| Samoa                            | 2002 | 1.173842 | 1.024537 |
| Samoa                            | 2003 | 1.149307 | 1.003549 |
| Samoa                            | 2004 | 1.138468 | 0.993735 |
| Samoa                            | 2005 | 1.108915 | 0.967133 |
| Samoa                            | 2006 | 1.073711 | 0.93589  |
| Samoa                            | 2007 | 1.042902 | 0.907576 |
| Samoa                            | 2008 | 1.016908 | 0.884179 |
| Samoa                            | 2009 | 0.997005 | 0.866721 |
| Samoa                            | 2010 | 0.976604 | 0.849334 |

|            |      |          |          |
|------------|------|----------|----------|
| Samoa      | 2011 | 0.979265 | 0.852803 |
| Samoa      | 2012 | 0.968264 | 0.845265 |
| Samoa      | 2013 | 0.953319 | 0.834396 |
| Samoa      | 2014 | 0.945781 | 0.83022  |
| Samoa      | 2015 | 0.951454 | 0.837853 |
| Samoa      | 2016 | 0.955475 | 0.844459 |
| Samoa      | 2017 | 0.95904  | 0.851083 |
| Samoa      | 2018 | 0.959346 | 0.855019 |
| Samoa      | 2019 | 0.959927 | 0.859111 |
| San Marino | 1990 | 1.040527 | 0.662137 |
| San Marino | 1991 | 1.034054 | 0.656258 |
| San Marino | 1992 | 1.028794 | 0.650989 |
| San Marino | 1993 | 1.017848 | 0.641779 |
| San Marino | 1994 | 1.014914 | 0.637147 |
| San Marino | 1995 | 1.022855 | 0.638643 |
| San Marino | 1996 | 1.013723 | 0.629773 |
| San Marino | 1997 | 1.0178   | 0.629635 |
| San Marino | 1998 | 1.035194 | 0.637541 |
| San Marino | 1999 | 1.043112 | 0.639273 |
| San Marino | 2000 | 1.061203 | 0.647772 |
| San Marino | 2001 | 1.10068  | 0.670472 |
| San Marino | 2002 | 1.14621  | 0.698311 |
| San Marino | 2003 | 1.202461 | 0.735765 |
| San Marino | 2004 | 1.23389  | 0.760178 |
| San Marino | 2005 | 1.268334 | 0.786763 |

|                       |      |          |          |
|-----------------------|------|----------|----------|
| San Marino            | 2006 | 1.273335 | 0.794871 |
| San Marino            | 2007 | 1.275614 | 0.800868 |
| San Marino            | 2008 | 1.277743 | 0.806368 |
| San Marino            | 2009 | 1.28295  | 0.813942 |
| San Marino            | 2010 | 1.285141 | 0.819464 |
| San Marino            | 2011 | 1.287608 | 0.82488  |
| San Marino            | 2012 | 1.291652 | 0.831402 |
| San Marino            | 2013 | 1.289952 | 0.834102 |
| San Marino            | 2014 | 1.286467 | 0.835325 |
| San Marino            | 2015 | 1.283363 | 0.83659  |
| San Marino            | 2016 | 1.277029 | 0.835106 |
| San Marino            | 2017 | 1.264401 | 0.829351 |
| San Marino            | 2018 | 1.251972 | 0.823236 |
| San Marino            | 2019 | 1.24039  | 0.817325 |
| Sao Tome and Principe | 1990 | 1.091374 | 0.933524 |
| Sao Tome and Principe | 1991 | 1.113804 | 0.953047 |
| Sao Tome and Principe | 1992 | 1.139972 | 0.980625 |
| Sao Tome and Principe | 1993 | 1.215059 | 1.081878 |
| Sao Tome and Principe | 1994 | 1.239155 | 1.109895 |
| Sao Tome and Principe | 1995 | 1.238259 | 1.114617 |
| Sao Tome and Principe | 1996 | 1.244594 | 1.125181 |
| Sao Tome and Principe | 1997 | 1.254845 | 1.138117 |
| Sao Tome and Principe | 1998 | 1.258592 | 1.1408   |
| Sao Tome and Principe | 1999 | 1.273254 | 1.152136 |
| Sao Tome and Principe | 2000 | 1.308013 | 1.172362 |

|                       |      |          |          |
|-----------------------|------|----------|----------|
| Sao Tome and Principe | 2001 | 1.29916  | 1.159733 |
| Sao Tome and Principe | 2002 | 1.282631 | 1.149629 |
| Sao Tome and Principe | 2003 | 1.269253 | 1.131711 |
| Sao Tome and Principe | 2004 | 1.255308 | 1.12558  |
| Sao Tome and Principe | 2005 | 1.212922 | 1.088347 |
| Sao Tome and Principe | 2006 | 1.221649 | 1.093759 |
| Sao Tome and Principe | 2007 | 1.246116 | 1.111153 |
| Sao Tome and Principe | 2008 | 1.226771 | 1.095035 |
| Sao Tome and Principe | 2009 | 1.23417  | 1.099047 |
| Sao Tome and Principe | 2010 | 1.258555 | 1.117148 |
| Sao Tome and Principe | 2011 | 1.232555 | 1.096997 |
| Sao Tome and Principe | 2012 | 1.205056 | 1.075871 |
| Sao Tome and Principe | 2013 | 1.198096 | 1.069787 |
| Sao Tome and Principe | 2014 | 1.213287 | 1.080153 |
| Sao Tome and Principe | 2015 | 1.213986 | 1.080881 |
| Sao Tome and Principe | 2016 | 1.216079 | 1.082527 |
| Sao Tome and Principe | 2017 | 1.219651 | 1.086355 |
| Sao Tome and Principe | 2018 | 1.220924 | 1.08889  |
| Sao Tome and Principe | 2019 | 1.219127 | 1.08909  |
| Saudi Arabia          | 1990 | 0.695398 | 0.829786 |
| Saudi Arabia          | 1991 | 0.712169 | 0.854348 |
| Saudi Arabia          | 1992 | 0.719496 | 0.867184 |
| Saudi Arabia          | 1993 | 0.727002 | 0.878748 |
| Saudi Arabia          | 1994 | 0.742709 | 0.898777 |
| Saudi Arabia          | 1995 | 0.761874 | 0.922789 |

|              |      |          |          |
|--------------|------|----------|----------|
| Saudi Arabia | 1996 | 0.784305 | 0.947356 |
| Saudi Arabia | 1997 | 0.804263 | 0.967726 |
| Saudi Arabia | 1998 | 0.810679 | 0.973063 |
| Saudi Arabia | 1999 | 0.816395 | 0.976741 |
| Saudi Arabia | 2000 | 0.820477 | 0.983554 |
| Saudi Arabia | 2001 | 0.821211 | 0.976888 |
| Saudi Arabia | 2002 | 0.827178 | 0.977433 |
| Saudi Arabia | 2003 | 0.822493 | 0.962185 |
| Saudi Arabia | 2004 | 0.821679 | 0.95553  |
| Saudi Arabia | 2005 | 0.815244 | 0.948694 |
| Saudi Arabia | 2006 | 0.810154 | 0.94029  |
| Saudi Arabia | 2007 | 0.800765 | 0.931723 |
| Saudi Arabia | 2008 | 0.786844 | 0.922069 |
| Saudi Arabia | 2009 | 0.772323 | 0.91303  |
| Saudi Arabia | 2010 | 0.76119  | 0.911913 |
| Saudi Arabia | 2011 | 0.745556 | 0.899816 |
| Saudi Arabia | 2012 | 0.73911  | 0.89891  |
| Saudi Arabia | 2013 | 0.736146 | 0.907402 |
| Saudi Arabia | 2014 | 0.739157 | 0.923105 |
| Saudi Arabia | 2015 | 0.740954 | 0.940363 |
| Saudi Arabia | 2016 | 0.745207 | 0.95483  |
| Saudi Arabia | 2017 | 0.752481 | 0.975445 |
| Saudi Arabia | 2018 | 0.758989 | 0.995576 |
| Saudi Arabia | 2019 | 0.763422 | 1.013679 |
| Senegal      | 1990 | 0.884747 | 0.858724 |

|         |      |          |          |
|---------|------|----------|----------|
| Senegal | 1991 | 0.891844 | 0.862058 |
| Senegal | 1992 | 0.896679 | 0.863392 |
| Senegal | 1993 | 0.898105 | 0.862398 |
| Senegal | 1994 | 0.899111 | 0.862183 |
| Senegal | 1995 | 0.899343 | 0.859763 |
| Senegal | 1996 | 0.898532 | 0.857803 |
| Senegal | 1997 | 0.886586 | 0.844268 |
| Senegal | 1998 | 0.88376  | 0.840365 |
| Senegal | 1999 | 0.881527 | 0.836596 |
| Senegal | 2000 | 0.879275 | 0.831594 |
| Senegal | 2001 | 0.872506 | 0.825969 |
| Senegal | 2002 | 0.870204 | 0.822799 |
| Senegal | 2003 | 0.873973 | 0.821234 |
| Senegal | 2004 | 0.850079 | 0.798413 |
| Senegal | 2005 | 0.827835 | 0.77646  |
| Senegal | 2006 | 0.808141 | 0.756535 |
| Senegal | 2007 | 0.794045 | 0.741842 |
| Senegal | 2008 | 0.77887  | 0.72756  |
| Senegal | 2009 | 0.767907 | 0.716548 |
| Senegal | 2010 | 0.767865 | 0.711673 |
| Senegal | 2011 | 0.767131 | 0.709302 |
| Senegal | 2012 | 0.765409 | 0.707099 |
| Senegal | 2013 | 0.761534 | 0.704161 |
| Senegal | 2014 | 0.764675 | 0.707866 |
| Senegal | 2015 | 0.770795 | 0.712137 |

|         |      |          |          |
|---------|------|----------|----------|
| Senegal | 2016 | 0.779506 | 0.720298 |
| Senegal | 2017 | 0.787654 | 0.727948 |
| Senegal | 2018 | 0.79524  | 0.735888 |
| Senegal | 2019 | 0.802915 | 0.743064 |
| Serbia  | 1990 | 0.73799  | 0.603061 |
| Serbia  | 1991 | 0.751915 | 0.61215  |
| Serbia  | 1992 | 0.745895 | 0.598418 |
| Serbia  | 1993 | 0.766901 | 0.611856 |
| Serbia  | 1994 | 0.781888 | 0.620647 |
| Serbia  | 1995 | 0.792746 | 0.626364 |
| Serbia  | 1996 | 0.802507 | 0.635855 |
| Serbia  | 1997 | 0.815138 | 0.652642 |
| Serbia  | 1998 | 0.778837 | 0.621888 |
| Serbia  | 1999 | 0.794648 | 0.623776 |
| Serbia  | 2000 | 0.769534 | 0.605957 |
| Serbia  | 2001 | 0.77247  | 0.605364 |
| Serbia  | 2002 | 0.734907 | 0.574323 |
| Serbia  | 2003 | 0.746359 | 0.581392 |
| Serbia  | 2004 | 0.746084 | 0.578442 |
| Serbia  | 2005 | 0.760475 | 0.588941 |
| Serbia  | 2006 | 0.76393  | 0.589334 |
| Serbia  | 2007 | 0.77937  | 0.595466 |
| Serbia  | 2008 | 0.801348 | 0.61088  |
| Serbia  | 2009 | 0.83196  | 0.636222 |
| Serbia  | 2010 | 0.852949 | 0.653777 |

|            |      |          |          |
|------------|------|----------|----------|
| Serbia     | 2011 | 0.863156 | 0.660403 |
| Serbia     | 2012 | 0.88227  | 0.670731 |
| Serbia     | 2013 | 0.853039 | 0.639376 |
| Serbia     | 2014 | 0.87394  | 0.650601 |
| Serbia     | 2015 | 0.899328 | 0.670437 |
| Serbia     | 2016 | 0.926887 | 0.690613 |
| Serbia     | 2017 | 0.925711 | 0.690169 |
| Serbia     | 2018 | 0.933605 | 0.693648 |
| Serbia     | 2019 | 0.933707 | 0.696426 |
| Seychelles | 1990 | 1.017107 | 0.702428 |
| Seychelles | 1991 | 1.020898 | 0.697742 |
| Seychelles | 1992 | 1.022397 | 0.693457 |
| Seychelles | 1993 | 1.02782  | 0.692034 |
| Seychelles | 1994 | 1.017442 | 0.68456  |
| Seychelles | 1995 | 1.016606 | 0.679526 |
| Seychelles | 1996 | 1.045304 | 0.695115 |
| Seychelles | 1997 | 1.092161 | 0.725276 |
| Seychelles | 1998 | 1.128929 | 0.75104  |
| Seychelles | 1999 | 1.142566 | 0.765246 |
| Seychelles | 2000 | 1.186127 | 0.802943 |
| Seychelles | 2001 | 1.202158 | 0.822396 |
| Seychelles | 2002 | 1.188011 | 0.82041  |
| Seychelles | 2003 | 1.171268 | 0.813173 |
| Seychelles | 2004 | 1.209464 | 0.842131 |
| Seychelles | 2005 | 1.169282 | 0.805472 |



|              |      |          |          |
|--------------|------|----------|----------|
| Seychelles   | 2006 | 1.185979 | 0.818787 |
| Seychelles   | 2007 | 1.214313 | 0.845111 |
| Seychelles   | 2008 | 1.2311   | 0.859386 |
| Seychelles   | 2009 | 1.197098 | 0.834808 |
| Seychelles   | 2010 | 1.212228 | 0.867157 |
| Seychelles   | 2011 | 1.228304 | 0.902733 |
| Seychelles   | 2012 | 1.192854 | 0.880645 |
| Seychelles   | 2013 | 1.216633 | 0.907188 |
| Seychelles   | 2014 | 1.212517 | 0.925165 |
| Seychelles   | 2015 | 1.169363 | 0.915602 |
| Seychelles   | 2016 | 1.134994 | 0.909444 |
| Seychelles   | 2017 | 1.109851 | 0.89732  |
| Seychelles   | 2018 | 1.097048 | 0.897572 |
| Seychelles   | 2019 | 1.082504 | 0.898742 |
| Sierra Leone | 1990 | 0.787919 | 0.795377 |
| Sierra Leone | 1991 | 0.790962 | 0.792612 |
| Sierra Leone | 1992 | 0.792598 | 0.791321 |
| Sierra Leone | 1993 | 0.792881 | 0.789444 |
| Sierra Leone | 1994 | 0.810527 | 0.795239 |
| Sierra Leone | 1995 | 0.815354 | 0.795979 |
| Sierra Leone | 1996 | 0.830066 | 0.804332 |
| Sierra Leone | 1997 | 0.84446  | 0.812131 |
| Sierra Leone | 1998 | 0.851017 | 0.812806 |
| Sierra Leone | 1999 | 0.863143 | 0.810965 |
| Sierra Leone | 2000 | 0.867725 | 0.81152  |

|              |      |          |          |
|--------------|------|----------|----------|
| Sierra Leone | 2001 | 0.870057 | 0.807892 |
| Sierra Leone | 2002 | 0.88269  | 0.814524 |
| Sierra Leone | 2003 | 0.887295 | 0.814107 |
| Sierra Leone | 2004 | 0.904772 | 0.819484 |
| Sierra Leone | 2005 | 0.902009 | 0.816075 |
| Sierra Leone | 2006 | 0.904874 | 0.816248 |
| Sierra Leone | 2007 | 0.908455 | 0.817708 |
| Sierra Leone | 2008 | 0.9111   | 0.81823  |
| Sierra Leone | 2009 | 0.916357 | 0.819564 |
| Sierra Leone | 2010 | 0.905713 | 0.815749 |
| Sierra Leone | 2011 | 0.90687  | 0.815569 |
| Sierra Leone | 2012 | 0.900591 | 0.815611 |
| Sierra Leone | 2013 | 0.898045 | 0.816791 |
| Sierra Leone | 2014 | 0.901668 | 0.824467 |
| Sierra Leone | 2015 | 0.894141 | 0.823506 |
| Sierra Leone | 2016 | 0.895925 | 0.830446 |
| Sierra Leone | 2017 | 0.895543 | 0.833929 |
| Sierra Leone | 2018 | 0.89368  | 0.835265 |
| Sierra Leone | 2019 | 0.891018 | 0.836793 |
| Singapore    | 1990 | 1.163438 | 0.899451 |
| Singapore    | 1991 | 1.129393 | 0.881363 |
| Singapore    | 1992 | 1.153563 | 0.921822 |
| Singapore    | 1993 | 1.116385 | 0.896281 |
| Singapore    | 1994 | 1.076889 | 0.845189 |
| Singapore    | 1995 | 1.050864 | 0.825318 |

|           |      |          |          |
|-----------|------|----------|----------|
| Singapore | 1996 | 1.071672 | 0.841391 |
| Singapore | 1997 | 1.106303 | 0.867415 |
| Singapore | 1998 | 1.083205 | 0.853333 |
| Singapore | 1999 | 1.096735 | 0.864456 |
| Singapore | 2000 | 1.107024 | 0.8751   |
| Singapore | 2001 | 1.12114  | 0.885171 |
| Singapore | 2002 | 1.135497 | 0.893845 |
| Singapore | 2003 | 1.181337 | 0.921314 |
| Singapore | 2004 | 1.240904 | 0.956691 |
| Singapore | 2005 | 1.124899 | 0.861722 |
| Singapore | 2006 | 1.140442 | 0.868721 |
| Singapore | 2007 | 1.129855 | 0.864193 |
| Singapore | 2008 | 1.16467  | 0.901644 |
| Singapore | 2009 | 1.191044 | 0.920265 |
| Singapore | 2010 | 1.184357 | 0.90915  |
| Singapore | 2011 | 1.179199 | 0.910006 |
| Singapore | 2012 | 1.200217 | 0.933094 |
| Singapore | 2013 | 1.208179 | 0.949316 |
| Singapore | 2014 | 1.211514 | 0.953871 |
| Singapore | 2015 | 1.211928 | 0.960929 |
| Singapore | 2016 | 1.199671 | 0.951955 |
| Singapore | 2017 | 1.233326 | 0.968313 |
| Singapore | 2018 | 1.219639 | 0.959599 |
| Singapore | 2019 | 1.250283 | 0.991418 |
| Slovakia  | 1990 | 0.944649 | 0.647308 |

|          |      |          |          |
|----------|------|----------|----------|
| Slovakia | 1991 | 0.976455 | 0.663918 |
| Slovakia | 1992 | 0.955654 | 0.644376 |
| Slovakia | 1993 | 0.995726 | 0.665691 |
| Slovakia | 1994 | 1.009351 | 0.670677 |
| Slovakia | 1995 | 1.017436 | 0.674329 |
| Slovakia | 1996 | 1.009444 | 0.668133 |
| Slovakia | 1997 | 1.04119  | 0.687493 |
| Slovakia | 1998 | 0.992929 | 0.652283 |
| Slovakia | 1999 | 1.009819 | 0.657257 |
| Slovakia | 2000 | 0.975233 | 0.628247 |
| Slovakia | 2001 | 1.011914 | 0.645803 |
| Slovakia | 2002 | 0.985897 | 0.625087 |
| Slovakia | 2003 | 1.008043 | 0.633926 |
| Slovakia | 2004 | 1.051345 | 0.654676 |
| Slovakia | 2005 | 1.036508 | 0.64108  |
| Slovakia | 2006 | 1.062665 | 0.651686 |
| Slovakia | 2007 | 1.109865 | 0.678383 |
| Slovakia | 2008 | 1.093175 | 0.663884 |
| Slovakia | 2009 | 1.159077 | 0.696465 |
| Slovakia | 2010 | 1.148256 | 0.682306 |
| Slovakia | 2011 | 1.191118 | 0.703254 |
| Slovakia | 2012 | 1.21351  | 0.711767 |
| Slovakia | 2013 | 1.232331 | 0.720047 |
| Slovakia | 2014 | 1.222608 | 0.714766 |
| Slovakia | 2015 | 1.233158 | 0.725429 |

|          |      |          |          |
|----------|------|----------|----------|
| Slovakia | 2016 | 1.258443 | 0.742765 |
| Slovakia | 2017 | 1.250698 | 0.743898 |
| Slovakia | 2018 | 1.27032  | 0.760949 |
| Slovakia | 2019 | 1.267158 | 0.765874 |
| Slovenia | 1990 | 1.394688 | 0.780119 |
| Slovenia | 1991 | 1.410467 | 0.783523 |
| Slovenia | 1992 | 1.400783 | 0.768944 |
| Slovenia | 1993 | 1.378885 | 0.753192 |
| Slovenia | 1994 | 1.367196 | 0.740969 |
| Slovenia | 1995 | 1.317961 | 0.708775 |
| Slovenia | 1996 | 1.350995 | 0.720329 |
| Slovenia | 1997 | 1.295705 | 0.687694 |
| Slovenia | 1998 | 1.251271 | 0.658323 |
| Slovenia | 1999 | 1.262306 | 0.65755  |
| Slovenia | 2000 | 1.298258 | 0.663913 |
| Slovenia | 2001 | 1.266181 | 0.640215 |
| Slovenia | 2002 | 1.25989  | 0.622485 |
| Slovenia | 2003 | 1.165627 | 0.569175 |
| Slovenia | 2004 | 1.286114 | 0.622716 |
| Slovenia | 2005 | 1.400384 | 0.668478 |
| Slovenia | 2006 | 1.322378 | 0.627958 |
| Slovenia | 2007 | 1.411386 | 0.663917 |
| Slovenia | 2008 | 1.384634 | 0.647061 |
| Slovenia | 2009 | 1.44464  | 0.669581 |
| Slovenia | 2010 | 1.445478 | 0.668507 |

|                 |      |          |          |
|-----------------|------|----------|----------|
| Slovenia        | 2011 | 1.438805 | 0.663727 |
| Slovenia        | 2012 | 1.439959 | 0.665578 |
| Slovenia        | 2013 | 1.378243 | 0.641181 |
| Slovenia        | 2014 | 1.367799 | 0.636246 |
| Slovenia        | 2015 | 1.284322 | 0.602005 |
| Slovenia        | 2016 | 1.278014 | 0.603165 |
| Slovenia        | 2017 | 1.264785 | 0.601053 |
| Slovenia        | 2018 | 1.263189 | 0.607731 |
| Slovenia        | 2019 | 1.258858 | 0.612691 |
| Solomon Islands | 1990 | 1.037928 | 1.144353 |
| Solomon Islands | 1991 | 1.044417 | 1.148198 |
| Solomon Islands | 1992 | 1.056013 | 1.156976 |
| Solomon Islands | 1993 | 1.066592 | 1.164159 |
| Solomon Islands | 1994 | 1.081983 | 1.175924 |
| Solomon Islands | 1995 | 1.097222 | 1.188241 |
| Solomon Islands | 1996 | 1.117544 | 1.206361 |
| Solomon Islands | 1997 | 1.138033 | 1.223701 |
| Solomon Islands | 1998 | 1.159552 | 1.241819 |
| Solomon Islands | 1999 | 1.178626 | 1.257071 |
| Solomon Islands | 2000 | 1.186507 | 1.258405 |
| Solomon Islands | 2001 | 1.182493 | 1.246874 |
| Solomon Islands | 2002 | 1.179042 | 1.236279 |
| Solomon Islands | 2003 | 1.182097 | 1.232562 |
| Solomon Islands | 2004 | 1.190252 | 1.233961 |
| Solomon Islands | 2005 | 1.191227 | 1.229107 |

|                 |      |          |          |
|-----------------|------|----------|----------|
| Solomon Islands | 2006 | 1.175755 | 1.207357 |
| Solomon Islands | 2007 | 1.14858  | 1.174414 |
| Solomon Islands | 2008 | 1.102099 | 1.123378 |
| Solomon Islands | 2009 | 1.094535 | 1.111581 |
| Solomon Islands | 2010 | 1.074319 | 1.088844 |
| Solomon Islands | 2011 | 1.065332 | 1.078571 |
| Solomon Islands | 2012 | 1.049638 | 1.061376 |
| Solomon Islands | 2013 | 1.034952 | 1.044876 |
| Solomon Islands | 2014 | 1.026433 | 1.034451 |
| Solomon Islands | 2015 | 1.016654 | 1.022379 |
| Solomon Islands | 2016 | 1.007093 | 1.010933 |
| Solomon Islands | 2017 | 0.991614 | 0.993079 |
| Solomon Islands | 2018 | 0.970301 | 0.971456 |
| Solomon Islands | 2019 | 0.977609 | 0.976166 |
| Somalia         | 1990 | 0.750322 | 0.611496 |
| Somalia         | 1991 | 0.74324  | 0.601044 |
| Somalia         | 1992 | 0.728936 | 0.588467 |
| Somalia         | 1993 | 0.714142 | 0.574841 |
| Somalia         | 1994 | 0.705603 | 0.566449 |
| Somalia         | 1995 | 0.699071 | 0.560185 |
| Somalia         | 1996 | 0.704283 | 0.563338 |
| Somalia         | 1997 | 0.712917 | 0.569484 |
| Somalia         | 1998 | 0.723135 | 0.5768   |
| Somalia         | 1999 | 0.733781 | 0.58339  |
| Somalia         | 2000 | 0.743    | 0.588414 |

|              |      |          |          |
|--------------|------|----------|----------|
| Somalia      | 2001 | 0.755732 | 0.596479 |
| Somalia      | 2002 | 0.769071 | 0.604926 |
| Somalia      | 2003 | 0.784596 | 0.615255 |
| Somalia      | 2004 | 0.799497 | 0.62424  |
| Somalia      | 2005 | 0.813829 | 0.632367 |
| Somalia      | 2006 | 0.821399 | 0.634753 |
| Somalia      | 2007 | 0.832464 | 0.639935 |
| Somalia      | 2008 | 0.844469 | 0.644877 |
| Somalia      | 2009 | 0.85818  | 0.653139 |
| Somalia      | 2010 | 0.85573  | 0.64884  |
| Somalia      | 2011 | 0.853771 | 0.646719 |
| Somalia      | 2012 | 0.851149 | 0.646331 |
| Somalia      | 2013 | 0.850363 | 0.64823  |
| Somalia      | 2014 | 0.848187 | 0.649933 |
| Somalia      | 2015 | 0.846803 | 0.652619 |
| Somalia      | 2016 | 0.845299 | 0.654947 |
| Somalia      | 2017 | 0.842177 | 0.656193 |
| Somalia      | 2018 | 0.839293 | 0.655624 |
| Somalia      | 2019 | 0.839583 | 0.657314 |
| South Africa | 1990 | 0.872624 | 0.604062 |
| South Africa | 1991 | 0.844694 | 0.582752 |
| South Africa | 1992 | 0.912175 | 0.626358 |
| South Africa | 1993 | 0.863401 | 0.593813 |
| South Africa | 1994 | 0.89675  | 0.613044 |
| South Africa | 1995 | 0.800476 | 0.54839  |



|              |      |          |          |
|--------------|------|----------|----------|
| South Africa | 1996 | 0.806957 | 0.550274 |
| South Africa | 1997 | 0.857876 | 0.580401 |
| South Africa | 1998 | 0.839139 | 0.565984 |
| South Africa | 1999 | 0.862781 | 0.575683 |
| South Africa | 2000 | 0.883991 | 0.586252 |
| South Africa | 2001 | 0.882307 | 0.581695 |
| South Africa | 2002 | 0.886612 | 0.581614 |
| South Africa | 2003 | 0.883797 | 0.577566 |
| South Africa | 2004 | 0.881778 | 0.576085 |
| South Africa | 2005 | 0.876284 | 0.573943 |
| South Africa | 2006 | 0.875827 | 0.572977 |
| South Africa | 2007 | 0.865365 | 0.567608 |
| South Africa | 2008 | 0.86076  | 0.56512  |
| South Africa | 2009 | 0.858824 | 0.563312 |
| South Africa | 2010 | 0.859822 | 0.560691 |
| South Africa | 2011 | 0.874497 | 0.566917 |
| South Africa | 2012 | 0.883077 | 0.573793 |
| South Africa | 2013 | 0.891229 | 0.580179 |
| South Africa | 2014 | 0.904752 | 0.590606 |
| South Africa | 2015 | 0.907736 | 0.594396 |
| South Africa | 2016 | 0.90994  | 0.594798 |
| South Africa | 2017 | 0.893752 | 0.587799 |
| South Africa | 2018 | 0.874707 | 0.580501 |
| South Africa | 2019 | 0.872436 | 0.582659 |
| South Sudan  | 1990 | 0.617642 | 0.646117 |

|             |      |          |          |
|-------------|------|----------|----------|
| South Sudan | 1991 | 0.608182 | 0.639096 |
| South Sudan | 1992 | 0.59649  | 0.630499 |
| South Sudan | 1993 | 0.583919 | 0.620618 |
| South Sudan | 1994 | 0.575092 | 0.614212 |
| South Sudan | 1995 | 0.56239  | 0.606514 |
| South Sudan | 1996 | 0.563369 | 0.609884 |
| South Sudan | 1997 | 0.563668 | 0.611578 |
| South Sudan | 1998 | 0.567632 | 0.617846 |
| South Sudan | 1999 | 0.571434 | 0.623961 |
| South Sudan | 2000 | 0.574652 | 0.628503 |
| South Sudan | 2001 | 0.579118 | 0.634668 |
| South Sudan | 2002 | 0.583072 | 0.639749 |
| South Sudan | 2003 | 0.588461 | 0.647561 |
| South Sudan | 2004 | 0.592934 | 0.651815 |
| South Sudan | 2005 | 0.600938 | 0.657757 |
| South Sudan | 2006 | 0.602378 | 0.65759  |
| South Sudan | 2007 | 0.601339 | 0.654603 |
| South Sudan | 2008 | 0.600134 | 0.650473 |
| South Sudan | 2009 | 0.605369 | 0.654527 |
| South Sudan | 2010 | 0.609132 | 0.657795 |
| South Sudan | 2011 | 0.617707 | 0.666383 |
| South Sudan | 2012 | 0.626237 | 0.674514 |
| South Sudan | 2013 | 0.637096 | 0.682281 |
| South Sudan | 2014 | 0.646201 | 0.689662 |
| South Sudan | 2015 | 0.658325 | 0.698963 |

|             |      |          |          |
|-------------|------|----------|----------|
| South Sudan | 2016 | 0.66504  | 0.704405 |
| South Sudan | 2017 | 0.668702 | 0.710524 |
| South Sudan | 2018 | 0.674969 | 0.717543 |
| South Sudan | 2019 | 0.681735 | 0.723315 |
| Spain       | 1990 | 1.141463 | 0.683647 |
| Spain       | 1991 | 1.147613 | 0.682843 |
| Spain       | 1992 | 1.158914 | 0.68726  |
| Spain       | 1993 | 1.175718 | 0.693078 |
| Spain       | 1994 | 1.192094 | 0.698995 |
| Spain       | 1995 | 1.19173  | 0.693909 |
| Spain       | 1996 | 1.207036 | 0.697607 |
| Spain       | 1997 | 1.226235 | 0.7048   |
| Spain       | 1998 | 1.217732 | 0.695168 |
| Spain       | 1999 | 1.20048  | 0.682673 |
| Spain       | 2000 | 1.228318 | 0.693744 |
| Spain       | 2001 | 1.242731 | 0.698067 |
| Spain       | 2002 | 1.238513 | 0.693436 |
| Spain       | 2003 | 1.246203 | 0.693896 |
| Spain       | 2004 | 1.251368 | 0.694341 |
| Spain       | 2005 | 1.253901 | 0.692857 |
| Spain       | 2006 | 1.261916 | 0.693236 |
| Spain       | 2007 | 1.25726  | 0.689482 |
| Spain       | 2008 | 1.266641 | 0.690584 |
| Spain       | 2009 | 1.271022 | 0.691003 |
| Spain       | 2010 | 1.264498 | 0.682622 |

|           |      |          |          |
|-----------|------|----------|----------|
| Spain     | 2011 | 1.291473 | 0.694299 |
| Spain     | 2012 | 1.314847 | 0.704675 |
| Spain     | 2013 | 1.344507 | 0.71982  |
| Spain     | 2014 | 1.360219 | 0.725666 |
| Spain     | 2015 | 1.372704 | 0.730595 |
| Spain     | 2016 | 1.381235 | 0.734868 |
| Spain     | 2017 | 1.36967  | 0.731334 |
| Spain     | 2018 | 1.393998 | 0.747474 |
| Spain     | 2019 | 1.395263 | 0.752339 |
| Sri Lanka | 1990 | 0.565329 | 0.584802 |
| Sri Lanka | 1991 | 0.578904 | 0.591445 |
| Sri Lanka | 1992 | 0.585931 | 0.589963 |
| Sri Lanka | 1993 | 0.613223 | 0.609778 |
| Sri Lanka | 1994 | 0.622568 | 0.615605 |
| Sri Lanka | 1995 | 0.602386 | 0.593602 |
| Sri Lanka | 1996 | 0.63306  | 0.6159   |
| Sri Lanka | 1997 | 0.659262 | 0.633113 |
| Sri Lanka | 1998 | 0.676796 | 0.64036  |
| Sri Lanka | 1999 | 0.692609 | 0.64573  |
| Sri Lanka | 2000 | 0.697856 | 0.645993 |
| Sri Lanka | 2001 | 0.702683 | 0.642068 |
| Sri Lanka | 2002 | 0.734883 | 0.662004 |
| Sri Lanka | 2003 | 0.748233 | 0.669226 |
| Sri Lanka | 2004 | 0.782674 | 0.693991 |
| Sri Lanka | 2005 | 0.793452 | 0.698699 |

|           |      |          |          |
|-----------|------|----------|----------|
| Sri Lanka | 2006 | 0.819849 | 0.71548  |
| Sri Lanka | 2007 | 0.814719 | 0.702651 |
| Sri Lanka | 2008 | 0.806527 | 0.685378 |
| Sri Lanka | 2009 | 0.883706 | 0.741235 |
| Sri Lanka | 2010 | 0.855375 | 0.717334 |
| Sri Lanka | 2011 | 0.818618 | 0.683409 |
| Sri Lanka | 2012 | 0.786608 | 0.649113 |
| Sri Lanka | 2013 | 0.801781 | 0.655676 |
| Sri Lanka | 2014 | 0.796339 | 0.645695 |
| Sri Lanka | 2015 | 0.801576 | 0.645614 |
| Sri Lanka | 2016 | 0.807734 | 0.645914 |
| Sri Lanka | 2017 | 0.816588 | 0.648192 |
| Sri Lanka | 2018 | 0.838493 | 0.661592 |
| Sri Lanka | 2019 | 0.845783 | 0.662182 |
| Sudan     | 1990 | 0.915215 | 0.883364 |
| Sudan     | 1991 | 0.89466  | 0.868908 |
| Sudan     | 1992 | 0.88086  | 0.859938 |
| Sudan     | 1993 | 0.868571 | 0.852353 |
| Sudan     | 1994 | 0.862812 | 0.850964 |
| Sudan     | 1995 | 0.858514 | 0.851763 |
| Sudan     | 1996 | 0.854869 | 0.853362 |
| Sudan     | 1997 | 0.848693 | 0.851978 |
| Sudan     | 1998 | 0.841506 | 0.849976 |
| Sudan     | 1999 | 0.8354   | 0.848705 |
| Sudan     | 2000 | 0.832796 | 0.850843 |

|          |      |          |          |
|----------|------|----------|----------|
| Sudan    | 2001 | 0.834451 | 0.85806  |
| Sudan    | 2002 | 0.832769 | 0.861836 |
| Sudan    | 2003 | 0.833939 | 0.869412 |
| Sudan    | 2004 | 0.839011 | 0.879915 |
| Sudan    | 2005 | 0.849835 | 0.89299  |
| Sudan    | 2006 | 0.838268 | 0.884609 |
| Sudan    | 2007 | 0.824546 | 0.874958 |
| Sudan    | 2008 | 0.810984 | 0.865859 |
| Sudan    | 2009 | 0.802669 | 0.861309 |
| Sudan    | 2010 | 0.796912 | 0.861204 |
| Sudan    | 2011 | 0.795754 | 0.865036 |
| Sudan    | 2012 | 0.79713  | 0.870054 |
| Sudan    | 2013 | 0.8      | 0.877201 |
| Sudan    | 2014 | 0.808748 | 0.88856  |
| Sudan    | 2015 | 0.816839 | 0.901218 |
| Sudan    | 2016 | 0.822954 | 0.911158 |
| Sudan    | 2017 | 0.829787 | 0.921163 |
| Sudan    | 2018 | 0.833647 | 0.928108 |
| Sudan    | 2019 | 0.836752 | 0.93243  |
| Suriname | 1990 | 0.787543 | 0.676472 |
| Suriname | 1991 | 0.773625 | 0.664525 |
| Suriname | 1992 | 0.762927 | 0.657532 |
| Suriname | 1993 | 0.735734 | 0.635602 |
| Suriname | 1994 | 0.730993 | 0.63073  |
| Suriname | 1995 | 0.749511 | 0.643204 |

|          |      |          |          |
|----------|------|----------|----------|
| Suriname | 1996 | 0.753184 | 0.648987 |
| Suriname | 1997 | 0.72162  | 0.620651 |
| Suriname | 1998 | 0.689955 | 0.59407  |
| Suriname | 1999 | 0.717914 | 0.623254 |
| Suriname | 2000 | 0.729871 | 0.626825 |
| Suriname | 2001 | 0.739779 | 0.625425 |
| Suriname | 2002 | 0.768182 | 0.652205 |
| Suriname | 2003 | 0.759013 | 0.647365 |
| Suriname | 2004 | 0.789716 | 0.673453 |
| Suriname | 2005 | 0.792861 | 0.669835 |
| Suriname | 2006 | 0.809596 | 0.685651 |
| Suriname | 2007 | 0.794531 | 0.673183 |
| Suriname | 2008 | 0.783635 | 0.659421 |
| Suriname | 2009 | 0.795851 | 0.66849  |
| Suriname | 2010 | 0.777593 | 0.653797 |
| Suriname | 2011 | 0.790986 | 0.667096 |
| Suriname | 2012 | 0.803316 | 0.677208 |
| Suriname | 2013 | 0.781261 | 0.653612 |
| Suriname | 2014 | 0.786669 | 0.651621 |
| Suriname | 2015 | 0.81729  | 0.675948 |
| Suriname | 2016 | 0.837001 | 0.69061  |
| Suriname | 2017 | 0.845809 | 0.696292 |
| Suriname | 2018 | 0.857382 | 0.703866 |
| Suriname | 2019 | 0.874242 | 0.715426 |
| Sweden   | 1990 | 0.754326 | 0.463779 |

|        |      |          |          |
|--------|------|----------|----------|
| Sweden | 1991 | 0.743543 | 0.454427 |
| Sweden | 1992 | 0.750763 | 0.455035 |
| Sweden | 1993 | 0.739427 | 0.445076 |
| Sweden | 1994 | 0.745978 | 0.44729  |
| Sweden | 1995 | 0.748424 | 0.448184 |
| Sweden | 1996 | 0.781246 | 0.465371 |
| Sweden | 1997 | 0.792434 | 0.470712 |
| Sweden | 1998 | 0.797746 | 0.471452 |
| Sweden | 1999 | 0.810983 | 0.477167 |
| Sweden | 2000 | 0.846597 | 0.497609 |
| Sweden | 2001 | 0.846216 | 0.497371 |
| Sweden | 2002 | 0.854622 | 0.502943 |
| Sweden | 2003 | 0.852701 | 0.503031 |
| Sweden | 2004 | 0.849916 | 0.501095 |
| Sweden | 2005 | 0.861536 | 0.509177 |
| Sweden | 2006 | 0.895253 | 0.529417 |
| Sweden | 2007 | 0.912485 | 0.538504 |
| Sweden | 2008 | 0.914439 | 0.542118 |
| Sweden | 2009 | 0.913988 | 0.54386  |
| Sweden | 2010 | 0.939152 | 0.560356 |
| Sweden | 2011 | 0.944867 | 0.567629 |
| Sweden | 2012 | 0.948257 | 0.574409 |
| Sweden | 2013 | 0.960872 | 0.587228 |
| Sweden | 2014 | 0.971413 | 0.598792 |
| Sweden | 2015 | 0.963536 | 0.59731  |



|             |      |          |          |
|-------------|------|----------|----------|
| Sweden      | 2016 | 0.968405 | 0.604055 |
| Sweden      | 2017 | 0.963346 | 0.608837 |
| Sweden      | 2018 | 0.949485 | 0.613392 |
| Sweden      | 2019 | 0.9058   | 0.598532 |
| Switzerland | 1990 | 1.062104 | 0.561863 |
| Switzerland | 1991 | 1.085297 | 0.574003 |
| Switzerland | 1992 | 1.118409 | 0.592365 |
| Switzerland | 1993 | 1.151731 | 0.609078 |
| Switzerland | 1994 | 1.192699 | 0.630941 |
| Switzerland | 1995 | 1.214237 | 0.642122 |
| Switzerland | 1996 | 1.241375 | 0.653118 |
| Switzerland | 1997 | 1.258971 | 0.662246 |
| Switzerland | 1998 | 1.265703 | 0.664328 |
| Switzerland | 1999 | 1.290294 | 0.675357 |
| Switzerland | 2000 | 1.342631 | 0.69972  |
| Switzerland | 2001 | 1.37058  | 0.709901 |
| Switzerland | 2002 | 1.38254  | 0.715449 |
| Switzerland | 2003 | 1.407761 | 0.727    |
| Switzerland | 2004 | 1.433706 | 0.740367 |
| Switzerland | 2005 | 1.469206 | 0.757813 |
| Switzerland | 2006 | 1.471483 | 0.759842 |
| Switzerland | 2007 | 1.473616 | 0.761116 |
| Switzerland | 2008 | 1.497778 | 0.778024 |
| Switzerland | 2009 | 1.497785 | 0.78351  |
| Switzerland | 2010 | 1.481958 | 0.781891 |

|                      |      |          |          |
|----------------------|------|----------|----------|
| Switzerland          | 2011 | 1.467667 | 0.77742  |
| Switzerland          | 2012 | 1.488953 | 0.789545 |
| Switzerland          | 2013 | 1.487406 | 0.790652 |
| Switzerland          | 2014 | 1.488658 | 0.792981 |
| Switzerland          | 2015 | 1.465689 | 0.780309 |
| Switzerland          | 2016 | 1.478698 | 0.796645 |
| Switzerland          | 2017 | 1.447048 | 0.795428 |
| Switzerland          | 2018 | 1.438361 | 0.801749 |
| Switzerland          | 2019 | 1.413788 | 0.800998 |
| Syrian Arab Republic | 1990 | 0.917479 | 1.018136 |
| Syrian Arab Republic | 1991 | 0.91471  | 1.035383 |
| Syrian Arab Republic | 1992 | 0.91309  | 1.052004 |
| Syrian Arab Republic | 1993 | 0.888644 | 1.046973 |
| Syrian Arab Republic | 1994 | 0.905732 | 1.091777 |
| Syrian Arab Republic | 1995 | 0.9339   | 1.155488 |
| Syrian Arab Republic | 1996 | 0.935203 | 1.179075 |
| Syrian Arab Republic | 1997 | 0.926363 | 1.188127 |
| Syrian Arab Republic | 1998 | 0.940655 | 1.218168 |
| Syrian Arab Republic | 1999 | 0.924891 | 1.217608 |
| Syrian Arab Republic | 2000 | 0.917348 | 1.226316 |
| Syrian Arab Republic | 2001 | 0.901886 | 1.202629 |
| Syrian Arab Republic | 2002 | 0.891482 | 1.176015 |
| Syrian Arab Republic | 2003 | 0.877832 | 1.168175 |
| Syrian Arab Republic | 2004 | 0.894141 | 1.205428 |
| Syrian Arab Republic | 2005 | 0.891503 | 1.221358 |

|                            |      |          |          |
|----------------------------|------|----------|----------|
| Syrian Arab Republic       | 2006 | 0.89491  | 1.244382 |
| Syrian Arab Republic       | 2007 | 0.875609 | 1.230146 |
| Syrian Arab Republic       | 2008 | 0.854031 | 1.180682 |
| Syrian Arab Republic       | 2009 | 0.870141 | 1.206509 |
| Syrian Arab Republic       | 2010 | 0.909359 | 1.261294 |
| Syrian Arab Republic       | 2011 | 0.9272   | 1.277259 |
| Syrian Arab Republic       | 2012 | 0.939035 | 1.265399 |
| Syrian Arab Republic       | 2013 | 0.958657 | 1.276741 |
| Syrian Arab Republic       | 2014 | 0.975687 | 1.28192  |
| Syrian Arab Republic       | 2015 | 0.986622 | 1.266201 |
| Syrian Arab Republic       | 2016 | 0.993034 | 1.255924 |
| Syrian Arab Republic       | 2017 | 0.998276 | 1.248525 |
| Syrian Arab Republic       | 2018 | 1.004023 | 1.245232 |
| Syrian Arab Republic       | 2019 | 1.005204 | 1.238992 |
| Taiwan (Province of China) | 1990 | 0.985425 | 1.011569 |
| Taiwan (Province of China) | 1991 | 0.995354 | 1.029026 |
| Taiwan (Province of China) | 1992 | 0.985887 | 1.02406  |
| Taiwan (Province of China) | 1993 | 0.989273 | 1.033343 |
| Taiwan (Province of China) | 1994 | 0.954842 | 1.005088 |
| Taiwan (Province of China) | 1995 | 0.961873 | 1.010782 |
| Taiwan (Province of China) | 1996 | 0.968368 | 1.020645 |
| Taiwan (Province of China) | 1997 | 0.964296 | 1.015286 |
| Taiwan (Province of China) | 1998 | 0.979169 | 1.027264 |
| Taiwan (Province of China) | 1999 | 1.002197 | 1.050918 |
| Taiwan (Province of China) | 2000 | 1.009383 | 1.056412 |

|                            |      |          |          |
|----------------------------|------|----------|----------|
| Taiwan (Province of China) | 2001 | 1.009354 | 1.054034 |
| Taiwan (Province of China) | 2002 | 1.006938 | 1.043543 |
| Taiwan (Province of China) | 2003 | 1.017283 | 1.046037 |
| Taiwan (Province of China) | 2004 | 0.985298 | 1.009895 |
| Taiwan (Province of China) | 2005 | 0.980931 | 0.996768 |
| Taiwan (Province of China) | 2006 | 0.960976 | 0.966534 |
| Taiwan (Province of China) | 2007 | 0.981744 | 0.975252 |
| Taiwan (Province of China) | 2008 | 0.983518 | 0.965808 |
| Taiwan (Province of China) | 2009 | 0.999055 | 0.974124 |
| Taiwan (Province of China) | 2010 | 1.015987 | 0.975085 |
| Taiwan (Province of China) | 2011 | 0.98816  | 0.932321 |
| Taiwan (Province of China) | 2012 | 1.011285 | 0.935788 |
| Taiwan (Province of China) | 2013 | 1.014673 | 0.921141 |
| Taiwan (Province of China) | 2014 | 1.017774 | 0.913073 |
| Taiwan (Province of China) | 2015 | 1.017308 | 0.894752 |
| Taiwan (Province of China) | 2016 | 1.028637 | 0.885786 |
| Taiwan (Province of China) | 2017 | 1.049592 | 0.8845   |
| Taiwan (Province of China) | 2018 | 1.075771 | 0.889571 |
| Taiwan (Province of China) | 2019 | 1.085295 | 0.890293 |
| Tajikistan                 | 1990 | 1.073056 | 0.767723 |
| Tajikistan                 | 1991 | 1.087627 | 0.781103 |
| Tajikistan                 | 1992 | 1.074775 | 0.788456 |
| Tajikistan                 | 1993 | 1.104223 | 0.815629 |
| Tajikistan                 | 1994 | 1.111487 | 0.817704 |
| Tajikistan                 | 1995 | 1.082798 | 0.781517 |

|            |      |          |          |
|------------|------|----------|----------|
| Tajikistan | 1996 | 0.997321 | 0.703395 |
| Tajikistan | 1997 | 1.021929 | 0.708641 |
| Tajikistan | 1998 | 1.09509  | 0.757133 |
| Tajikistan | 1999 | 1.097986 | 0.769817 |
| Tajikistan | 2000 | 1.075764 | 0.773095 |
| Tajikistan | 2001 | 1.058164 | 0.766786 |
| Tajikistan | 2002 | 0.994554 | 0.740537 |
| Tajikistan | 2003 | 0.967197 | 0.738701 |
| Tajikistan | 2004 | 0.958714 | 0.745795 |
| Tajikistan | 2005 | 0.927086 | 0.725698 |
| Tajikistan | 2006 | 0.886752 | 0.692502 |
| Tajikistan | 2007 | 0.862094 | 0.673144 |
| Tajikistan | 2008 | 0.850079 | 0.661517 |
| Tajikistan | 2009 | 0.847407 | 0.659561 |
| Tajikistan | 2010 | 0.845459 | 0.657416 |
| Tajikistan | 2011 | 0.850017 | 0.665894 |
| Tajikistan | 2012 | 0.844328 | 0.666285 |
| Tajikistan | 2013 | 0.828206 | 0.64234  |
| Tajikistan | 2014 | 0.821117 | 0.634306 |
| Tajikistan | 2015 | 0.821088 | 0.630952 |
| Tajikistan | 2016 | 0.82218  | 0.628012 |
| Tajikistan | 2017 | 0.840047 | 0.6362   |
| Tajikistan | 2018 | 0.858145 | 0.653595 |
| Tajikistan | 2019 | 0.86892  | 0.663584 |
| Thailand   | 1990 | 0.681059 | 0.588169 |

|          |      |          |          |
|----------|------|----------|----------|
| Thailand | 1991 | 0.680018 | 0.593022 |
| Thailand | 1992 | 0.670693 | 0.590228 |
| Thailand | 1993 | 0.657486 | 0.586194 |
| Thailand | 1994 | 0.642782 | 0.582624 |
| Thailand | 1995 | 0.629929 | 0.578302 |
| Thailand | 1996 | 0.647371 | 0.596895 |
| Thailand | 1997 | 0.687893 | 0.630446 |
| Thailand | 1998 | 0.706685 | 0.61792  |
| Thailand | 1999 | 0.762966 | 0.658819 |
| Thailand | 2000 | 0.841298 | 0.719716 |
| Thailand | 2001 | 0.932113 | 0.799463 |
| Thailand | 2002 | 1.033857 | 0.882983 |
| Thailand | 2003 | 1.098239 | 0.934802 |
| Thailand | 2004 | 1.172291 | 0.993394 |
| Thailand | 2005 | 1.228727 | 1.038246 |
| Thailand | 2006 | 1.247513 | 1.050587 |
| Thailand | 2007 | 1.266169 | 1.065646 |
| Thailand | 2008 | 1.276799 | 1.071992 |
| Thailand | 2009 | 1.271683 | 1.063155 |
| Thailand | 2010 | 1.270152 | 1.059761 |
| Thailand | 2011 | 1.247955 | 1.040133 |
| Thailand | 2012 | 1.227875 | 1.01986  |
| Thailand | 2013 | 1.211694 | 1.00092  |
| Thailand | 2014 | 1.194524 | 0.980393 |
| Thailand | 2015 | 1.165776 | 0.949129 |

|             |      |          |          |
|-------------|------|----------|----------|
| Thailand    | 2016 | 1.156813 | 0.934726 |
| Thailand    | 2017 | 1.164108 | 0.932472 |
| Thailand    | 2018 | 1.183666 | 0.940038 |
| Thailand    | 2019 | 1.203826 | 0.949717 |
| Timor-Leste | 1990 | 1.196681 | 1.155464 |
| Timor-Leste | 1991 | 1.183547 | 1.14905  |
| Timor-Leste | 1992 | 1.181926 | 1.153336 |
| Timor-Leste | 1993 | 1.18303  | 1.159541 |
| Timor-Leste | 1994 | 1.182152 | 1.16208  |
| Timor-Leste | 1995 | 1.180636 | 1.156541 |
| Timor-Leste | 1996 | 1.170038 | 1.148286 |
| Timor-Leste | 1997 | 1.164627 | 1.146855 |
| Timor-Leste | 1998 | 1.154785 | 1.144469 |
| Timor-Leste | 1999 | 1.124982 | 1.120679 |
| Timor-Leste | 2000 | 1.09484  | 1.088144 |
| Timor-Leste | 2001 | 1.068454 | 1.065474 |
| Timor-Leste | 2002 | 1.044813 | 1.045044 |
| Timor-Leste | 2003 | 1.021296 | 1.023366 |
| Timor-Leste | 2004 | 1.004261 | 1.007189 |
| Timor-Leste | 2005 | 0.995047 | 0.99295  |
| Timor-Leste | 2006 | 0.983217 | 0.979306 |
| Timor-Leste | 2007 | 0.97809  | 0.972303 |
| Timor-Leste | 2008 | 0.972901 | 0.96515  |
| Timor-Leste | 2009 | 0.958798 | 0.950179 |
| Timor-Leste | 2010 | 0.946263 | 0.931787 |

|             |      |          |          |
|-------------|------|----------|----------|
| Timor-Leste | 2011 | 0.944849 | 0.929167 |
| Timor-Leste | 2012 | 0.937733 | 0.922057 |
| Timor-Leste | 2013 | 0.933499 | 0.917589 |
| Timor-Leste | 2014 | 0.93137  | 0.915053 |
| Timor-Leste | 2015 | 0.931167 | 0.907643 |
| Timor-Leste | 2016 | 0.928885 | 0.902893 |
| Timor-Leste | 2017 | 0.923472 | 0.896569 |
| Timor-Leste | 2018 | 0.919177 | 0.891868 |
| Timor-Leste | 2019 | 0.914942 | 0.887747 |
| Togo        | 1990 | 0.962346 | 0.830838 |
| Togo        | 1991 | 0.950342 | 0.818605 |
| Togo        | 1992 | 0.930765 | 0.801384 |
| Togo        | 1993 | 0.906439 | 0.7784   |
| Togo        | 1994 | 0.88443  | 0.755182 |
| Togo        | 1995 | 0.860386 | 0.73047  |
| Togo        | 1996 | 0.836479 | 0.708339 |
| Togo        | 1997 | 0.828206 | 0.695167 |
| Togo        | 1998 | 0.809561 | 0.674108 |
| Togo        | 1999 | 0.790023 | 0.656131 |
| Togo        | 2000 | 0.780961 | 0.645704 |
| Togo        | 2001 | 0.770827 | 0.6343   |
| Togo        | 2002 | 0.774135 | 0.631214 |
| Togo        | 2003 | 0.770561 | 0.623609 |
| Togo        | 2004 | 0.764903 | 0.614684 |
| Togo        | 2005 | 0.761828 | 0.607812 |



|         |      |          |          |
|---------|------|----------|----------|
| Togo    | 2006 | 0.761196 | 0.602424 |
| Togo    | 2007 | 0.771884 | 0.603577 |
| Togo    | 2008 | 0.773679 | 0.597014 |
| Togo    | 2009 | 0.777731 | 0.597059 |
| Togo    | 2010 | 0.780742 | 0.597078 |
| Togo    | 2011 | 0.791777 | 0.600911 |
| Togo    | 2012 | 0.807868 | 0.605235 |
| Togo    | 2013 | 0.817276 | 0.606995 |
| Togo    | 2014 | 0.824303 | 0.612965 |
| Togo    | 2015 | 0.831794 | 0.618577 |
| Togo    | 2016 | 0.842748 | 0.627372 |
| Togo    | 2017 | 0.857032 | 0.634987 |
| Togo    | 2018 | 0.871302 | 0.642024 |
| Togo    | 2019 | 0.880134 | 0.6488   |
| Tokelau | 1990 | 1.654136 | 1.365381 |
| Tokelau | 1991 | 1.642666 | 1.35864  |
| Tokelau | 1992 | 1.620669 | 1.35639  |
| Tokelau | 1993 | 1.593963 | 1.351673 |
| Tokelau | 1994 | 1.576672 | 1.351523 |
| Tokelau | 1995 | 1.567959 | 1.352706 |
| Tokelau | 1996 | 1.573466 | 1.356843 |
| Tokelau | 1997 | 1.591125 | 1.360109 |
| Tokelau | 1998 | 1.621783 | 1.361206 |
| Tokelau | 1999 | 1.651438 | 1.353628 |
| Tokelau | 2000 | 1.677927 | 1.343664 |

|         |      |          |          |
|---------|------|----------|----------|
| Tokelau | 2001 | 1.68679  | 1.32952  |
| Tokelau | 2002 | 1.678846 | 1.323954 |
| Tokelau | 2003 | 1.646445 | 1.313106 |
| Tokelau | 2004 | 1.619364 | 1.314728 |
| Tokelau | 2005 | 1.551954 | 1.285902 |
| Tokelau | 2006 | 1.493012 | 1.260807 |
| Tokelau | 2007 | 1.434987 | 1.228593 |
| Tokelau | 2008 | 1.397422 | 1.202485 |
| Tokelau | 2009 | 1.37992  | 1.185755 |
| Tokelau | 2010 | 1.373876 | 1.178019 |
| Tokelau | 2011 | 1.361942 | 1.171336 |
| Tokelau | 2012 | 1.345399 | 1.168842 |
| Tokelau | 2013 | 1.328842 | 1.169288 |
| Tokelau | 2014 | 1.305957 | 1.165686 |
| Tokelau | 2015 | 1.28582  | 1.16589  |
| Tokelau | 2016 | 1.265894 | 1.168574 |
| Tokelau | 2017 | 1.255581 | 1.18055  |
| Tokelau | 2018 | 1.248531 | 1.189306 |
| Tokelau | 2019 | 1.245695 | 1.197551 |
| Tonga   | 1990 | 1.137947 | 0.954422 |
| Tonga   | 1991 | 1.150946 | 0.963223 |
| Tonga   | 1992 | 1.153805 | 0.956807 |
| Tonga   | 1993 | 1.175571 | 0.972467 |
| Tonga   | 1994 | 1.198633 | 0.991896 |
| Tonga   | 1995 | 1.222674 | 1.012158 |

|                     |      |          |          |
|---------------------|------|----------|----------|
| Tonga               | 1996 | 1.214661 | 1.004611 |
| Tonga               | 1997 | 1.215995 | 1.005481 |
| Tonga               | 1998 | 1.184864 | 0.982384 |
| Tonga               | 1999 | 1.116171 | 0.924504 |
| Tonga               | 2000 | 1.092365 | 0.89794  |
| Tonga               | 2001 | 1.072194 | 0.876573 |
| Tonga               | 2002 | 1.025257 | 0.834568 |
| Tonga               | 2003 | 0.987728 | 0.798999 |
| Tonga               | 2004 | 0.996284 | 0.801134 |
| Tonga               | 2005 | 1.010378 | 0.812375 |
| Tonga               | 2006 | 0.959076 | 0.770036 |
| Tonga               | 2007 | 0.91288  | 0.731886 |
| Tonga               | 2008 | 0.87431  | 0.699518 |
| Tonga               | 2009 | 0.844102 | 0.673292 |
| Tonga               | 2010 | 0.824036 | 0.655058 |
| Tonga               | 2011 | 0.811065 | 0.642886 |
| Tonga               | 2012 | 0.803065 | 0.634647 |
| Tonga               | 2013 | 0.79368  | 0.625524 |
| Tonga               | 2014 | 0.789094 | 0.620129 |
| Tonga               | 2015 | 0.790241 | 0.619271 |
| Tonga               | 2016 | 0.79346  | 0.620084 |
| Tonga               | 2017 | 0.803721 | 0.626275 |
| Tonga               | 2018 | 0.811761 | 0.630899 |
| Tonga               | 2019 | 0.819439 | 0.635363 |
| Trinidad and Tobago | 1990 | 0.600964 | 0.489801 |

|                     |      |          |          |
|---------------------|------|----------|----------|
| Trinidad and Tobago | 1991 | 0.627662 | 0.515626 |
| Trinidad and Tobago | 1992 | 0.606567 | 0.504513 |
| Trinidad and Tobago | 1993 | 0.64273  | 0.535968 |
| Trinidad and Tobago | 1994 | 0.643704 | 0.538284 |
| Trinidad and Tobago | 1995 | 0.699835 | 0.588405 |
| Trinidad and Tobago | 1996 | 0.630826 | 0.534858 |
| Trinidad and Tobago | 1997 | 0.670581 | 0.56774  |
| Trinidad and Tobago | 1998 | 0.668419 | 0.570753 |
| Trinidad and Tobago | 1999 | 0.693004 | 0.596655 |
| Trinidad and Tobago | 2000 | 0.721773 | 0.621557 |
| Trinidad and Tobago | 2001 | 0.707633 | 0.612719 |
| Trinidad and Tobago | 2002 | 0.708067 | 0.617553 |
| Trinidad and Tobago | 2003 | 0.702159 | 0.617369 |
| Trinidad and Tobago | 2004 | 0.719421 | 0.631428 |
| Trinidad and Tobago | 2005 | 0.697426 | 0.612803 |
| Trinidad and Tobago | 2006 | 0.752942 | 0.660694 |
| Trinidad and Tobago | 2007 | 0.769876 | 0.675302 |
| Trinidad and Tobago | 2008 | 0.726015 | 0.637953 |
| Trinidad and Tobago | 2009 | 0.751312 | 0.6574   |
| Trinidad and Tobago | 2010 | 0.747563 | 0.654669 |
| Trinidad and Tobago | 2011 | 0.748961 | 0.657407 |
| Trinidad and Tobago | 2012 | 0.758825 | 0.666719 |
| Trinidad and Tobago | 2013 | 0.75465  | 0.661016 |
| Trinidad and Tobago | 2014 | 0.74257  | 0.650544 |
| Trinidad and Tobago | 2015 | 0.728443 | 0.637884 |

|                     |      |          |          |
|---------------------|------|----------|----------|
| Trinidad and Tobago | 2016 | 0.714285 | 0.622822 |
| Trinidad and Tobago | 2017 | 0.708588 | 0.617215 |
| Trinidad and Tobago | 2018 | 0.705777 | 0.614191 |
| Trinidad and Tobago | 2019 | 0.700642 | 0.609275 |
| Tunisia             | 1990 | 0.922362 | 0.92216  |
| Tunisia             | 1991 | 0.91466  | 0.908992 |
| Tunisia             | 1992 | 0.909486 | 0.907232 |
| Tunisia             | 1993 | 0.893286 | 0.890379 |
| Tunisia             | 1994 | 0.889422 | 0.885243 |
| Tunisia             | 1995 | 0.915137 | 0.907174 |
| Tunisia             | 1996 | 0.915833 | 0.904284 |
| Tunisia             | 1997 | 0.911858 | 0.905111 |
| Tunisia             | 1998 | 0.906945 | 0.898084 |
| Tunisia             | 1999 | 0.902886 | 0.889968 |
| Tunisia             | 2000 | 0.895207 | 0.874845 |
| Tunisia             | 2001 | 0.896714 | 0.870498 |
| Tunisia             | 2002 | 0.901627 | 0.869276 |
| Tunisia             | 2003 | 0.896903 | 0.853638 |
| Tunisia             | 2004 | 0.907776 | 0.856652 |
| Tunisia             | 2005 | 0.920709 | 0.861737 |
| Tunisia             | 2006 | 0.929556 | 0.86298  |
| Tunisia             | 2007 | 0.942838 | 0.870231 |
| Tunisia             | 2008 | 0.955568 | 0.877671 |
| Tunisia             | 2009 | 0.960409 | 0.877045 |
| Tunisia             | 2010 | 0.968509 | 0.879379 |

|         |      |          |          |
|---------|------|----------|----------|
| Tunisia | 2011 | 0.982912 | 0.888732 |
| Tunisia | 2012 | 0.990537 | 0.890952 |
| Tunisia | 2013 | 1.002731 | 0.897425 |
| Tunisia | 2014 | 1.014181 | 0.903306 |
| Tunisia | 2015 | 1.026315 | 0.91006  |
| Tunisia | 2016 | 1.03649  | 0.914533 |
| Tunisia | 2017 | 1.04578  | 0.918231 |
| Tunisia | 2018 | 1.05692  | 0.925188 |
| Tunisia | 2019 | 1.070279 | 0.935564 |
| Turkey  | 1990 | 0.882338 | 0.747628 |
| Turkey  | 1991 | 0.923351 | 0.791123 |
| Turkey  | 1992 | 0.923977 | 0.795548 |
| Turkey  | 1993 | 0.926172 | 0.800107 |
| Turkey  | 1994 | 0.950114 | 0.827933 |
| Turkey  | 1995 | 0.9474   | 0.825339 |
| Turkey  | 1996 | 0.922129 | 0.799142 |
| Turkey  | 1997 | 0.877222 | 0.74673  |
| Turkey  | 1998 | 0.865027 | 0.727694 |
| Turkey  | 1999 | 0.904444 | 0.768061 |
| Turkey  | 2000 | 0.915587 | 0.780539 |
| Turkey  | 2001 | 0.842519 | 0.690307 |
| Turkey  | 2002 | 0.776753 | 0.607787 |
| Turkey  | 2003 | 0.77808  | 0.597431 |
| Turkey  | 2004 | 0.785448 | 0.592462 |
| Turkey  | 2005 | 0.826471 | 0.620965 |

|              |      |          |          |
|--------------|------|----------|----------|
| Turkey       | 2006 | 0.899691 | 0.676278 |
| Turkey       | 2007 | 0.989343 | 0.75242  |
| Turkey       | 2008 | 1.072288 | 0.831128 |
| Turkey       | 2009 | 1.07198  | 0.851161 |
| Turkey       | 2010 | 1.058503 | 0.849826 |
| Turkey       | 2011 | 1.045949 | 0.845235 |
| Turkey       | 2012 | 1.043623 | 0.847286 |
| Turkey       | 2013 | 1.048438 | 0.855723 |
| Turkey       | 2014 | 1.041235 | 0.848401 |
| Turkey       | 2015 | 1.054692 | 0.857405 |
| Turkey       | 2016 | 1.081499 | 0.880422 |
| Turkey       | 2017 | 1.101105 | 0.900345 |
| Turkey       | 2018 | 1.116604 | 0.915779 |
| Turkey       | 2019 | 1.122    | 0.920632 |
| Turkmenistan | 1990 | 1.024385 | 0.767814 |
| Turkmenistan | 1991 | 1.045253 | 0.777121 |
| Turkmenistan | 1992 | 1.073674 | 0.808289 |
| Turkmenistan | 1993 | 1.021469 | 0.770932 |
| Turkmenistan | 1994 | 0.985844 | 0.746882 |
| Turkmenistan | 1995 | 0.97205  | 0.741217 |
| Turkmenistan | 1996 | 0.92706  | 0.713066 |
| Turkmenistan | 1997 | 0.900121 | 0.699398 |
| Turkmenistan | 1998 | 0.849848 | 0.6639   |
| Turkmenistan | 1999 | 0.840053 | 0.656002 |
| Turkmenistan | 2000 | 0.836794 | 0.655332 |

|              |      |          |          |
|--------------|------|----------|----------|
| Turkmenistan | 2001 | 0.85116  | 0.669704 |
| Turkmenistan | 2002 | 0.841139 | 0.66648  |
| Turkmenistan | 2003 | 0.803498 | 0.640381 |
| Turkmenistan | 2004 | 0.779975 | 0.625078 |
| Turkmenistan | 2005 | 0.77615  | 0.626214 |
| Turkmenistan | 2006 | 0.78764  | 0.638138 |
| Turkmenistan | 2007 | 0.762627 | 0.622647 |
| Turkmenistan | 2008 | 0.768426 | 0.627439 |
| Turkmenistan | 2009 | 0.78346  | 0.63939  |
| Turkmenistan | 2010 | 0.784212 | 0.642602 |
| Turkmenistan | 2011 | 0.800166 | 0.659001 |
| Turkmenistan | 2012 | 0.804281 | 0.665747 |
| Turkmenistan | 2013 | 0.75502  | 0.629872 |
| Turkmenistan | 2014 | 0.730527 | 0.612734 |
| Turkmenistan | 2015 | 0.700143 | 0.590465 |
| Turkmenistan | 2016 | 0.706254 | 0.596266 |
| Turkmenistan | 2017 | 0.704075 | 0.595532 |
| Turkmenistan | 2018 | 0.696381 | 0.58806  |
| Turkmenistan | 2019 | 0.694862 | 0.587712 |
| Tuvalu       | 1990 | 1.28414  | 0.882899 |
| Tuvalu       | 1991 | 1.271231 | 0.881089 |
| Tuvalu       | 1992 | 1.266315 | 0.883443 |
| Tuvalu       | 1993 | 1.277371 | 0.895488 |
| Tuvalu       | 1994 | 1.270392 | 0.895911 |
| Tuvalu       | 1995 | 1.282723 | 0.910113 |



|        |      |          |          |
|--------|------|----------|----------|
| Tuvalu | 1996 | 1.28478  | 0.918413 |
| Tuvalu | 1997 | 1.283959 | 0.924284 |
| Tuvalu | 1998 | 1.26629  | 0.918439 |
| Tuvalu | 1999 | 1.265058 | 0.923673 |
| Tuvalu | 2000 | 1.27034  | 0.933788 |
| Tuvalu | 2001 | 1.248973 | 0.927207 |
| Tuvalu | 2002 | 1.230434 | 0.923587 |
| Tuvalu | 2003 | 1.209399 | 0.917821 |
| Tuvalu | 2004 | 1.19759  | 0.918897 |
| Tuvalu | 2005 | 1.160623 | 0.900505 |
| Tuvalu | 2006 | 1.128669 | 0.885957 |
| Tuvalu | 2007 | 1.088976 | 0.86284  |
| Tuvalu | 2008 | 1.055329 | 0.843309 |
| Tuvalu | 2009 | 1.029277 | 0.829027 |
| Tuvalu | 2010 | 1.0103   | 0.819353 |
| Tuvalu | 2011 | 0.990434 | 0.809332 |
| Tuvalu | 2012 | 0.972895 | 0.800738 |
| Tuvalu | 2013 | 0.958254 | 0.793897 |
| Tuvalu | 2014 | 0.943162 | 0.785966 |
| Tuvalu | 2015 | 0.932401 | 0.780965 |
| Tuvalu | 2016 | 0.922036 | 0.777291 |
| Tuvalu | 2017 | 0.917452 | 0.777446 |
| Tuvalu | 2018 | 0.911409 | 0.776202 |
| Tuvalu | 2019 | 0.904083 | 0.774402 |
| Uganda | 1990 | 0.548236 | 0.504404 |

|        |      |          |          |
|--------|------|----------|----------|
| Uganda | 1991 | 0.54013  | 0.490464 |
| Uganda | 1992 | 0.536199 | 0.480626 |
| Uganda | 1993 | 0.535278 | 0.47393  |
| Uganda | 1994 | 0.53796  | 0.471558 |
| Uganda | 1995 | 0.539955 | 0.468542 |
| Uganda | 1996 | 0.54526  | 0.469057 |
| Uganda | 1997 | 0.557288 | 0.474044 |
| Uganda | 1998 | 0.574814 | 0.482678 |
| Uganda | 1999 | 0.592851 | 0.492126 |
| Uganda | 2000 | 0.61163  | 0.502468 |
| Uganda | 2001 | 0.625378 | 0.50938  |
| Uganda | 2002 | 0.635621 | 0.514315 |
| Uganda | 2003 | 0.640481 | 0.516736 |
| Uganda | 2004 | 0.646589 | 0.518975 |
| Uganda | 2005 | 0.650511 | 0.520499 |
| Uganda | 2006 | 0.647978 | 0.517671 |
| Uganda | 2007 | 0.639278 | 0.511191 |
| Uganda | 2008 | 0.630149 | 0.504185 |
| Uganda | 2009 | 0.628857 | 0.503771 |
| Uganda | 2010 | 0.634139 | 0.506062 |
| Uganda | 2011 | 0.637465 | 0.508293 |
| Uganda | 2012 | 0.645277 | 0.514361 |
| Uganda | 2013 | 0.659301 | 0.522239 |
| Uganda | 2014 | 0.668866 | 0.527592 |
| Uganda | 2015 | 0.675581 | 0.531943 |

|         |      |          |          |
|---------|------|----------|----------|
| Uganda  | 2016 | 0.680967 | 0.534655 |
| Uganda  | 2017 | 0.68842  | 0.542143 |
| Uganda  | 2018 | 0.697821 | 0.550123 |
| Uganda  | 2019 | 0.70498  | 0.556486 |
| Ukraine | 1990 | 1.26884  | 0.535379 |
| Ukraine | 1991 | 1.265186 | 0.53084  |
| Ukraine | 1992 | 1.259455 | 0.527745 |
| Ukraine | 1993 | 1.283322 | 0.535352 |
| Ukraine | 1994 | 1.266652 | 0.530396 |
| Ukraine | 1995 | 1.223648 | 0.518507 |
| Ukraine | 1996 | 1.228618 | 0.517985 |
| Ukraine | 1997 | 1.257429 | 0.526083 |
| Ukraine | 1998 | 1.284121 | 0.532463 |
| Ukraine | 1999 | 1.261957 | 0.528379 |
| Ukraine | 2000 | 1.222739 | 0.518315 |
| Ukraine | 2001 | 1.218068 | 0.524698 |
| Ukraine | 2002 | 1.187573 | 0.52938  |
| Ukraine | 2003 | 1.17885  | 0.542352 |
| Ukraine | 2004 | 1.125673 | 0.539554 |
| Ukraine | 2005 | 1.059571 | 0.529521 |
| Ukraine | 2006 | 1.058946 | 0.534629 |
| Ukraine | 2007 | 1.027918 | 0.531838 |
| Ukraine | 2008 | 1.014702 | 0.529647 |
| Ukraine | 2009 | 1.082432 | 0.551625 |
| Ukraine | 2010 | 1.100984 | 0.556521 |

|                      |      |          |          |
|----------------------|------|----------|----------|
| Ukraine              | 2011 | 1.11073  | 0.562062 |
| Ukraine              | 2012 | 1.116488 | 0.569273 |
| Ukraine              | 2013 | 1.124589 | 0.579758 |
| Ukraine              | 2014 | 1.152312 | 0.594726 |
| Ukraine              | 2015 | 1.004352 | 0.550619 |
| Ukraine              | 2016 | 1.038161 | 0.568166 |
| Ukraine              | 2017 | 1.040673 | 0.563753 |
| Ukraine              | 2018 | 1.031214 | 0.550653 |
| Ukraine              | 2019 | 1.034153 | 0.548031 |
| United Arab Emirates | 1990 | 0.508775 | 1.055819 |
| United Arab Emirates | 1991 | 0.503032 | 1.069792 |
| United Arab Emirates | 1992 | 0.488118 | 1.067824 |
| United Arab Emirates | 1993 | 0.474784 | 1.069098 |
| United Arab Emirates | 1994 | 0.469924 | 1.103837 |
| United Arab Emirates | 1995 | 0.458375 | 1.106888 |
| United Arab Emirates | 1996 | 0.453324 | 1.114917 |
| United Arab Emirates | 1997 | 0.449076 | 1.143774 |
| United Arab Emirates | 1998 | 0.443761 | 1.145591 |
| United Arab Emirates | 1999 | 0.438082 | 1.140382 |
| United Arab Emirates | 2000 | 0.423761 | 1.063493 |
| United Arab Emirates | 2001 | 0.423709 | 1.065669 |
| United Arab Emirates | 2002 | 0.421871 | 1.066846 |
| United Arab Emirates | 2003 | 0.469095 | 1.226409 |
| United Arab Emirates | 2004 | 0.51104  | 1.461019 |
| United Arab Emirates | 2005 | 0.502397 | 1.530846 |

|                      |      |          |          |
|----------------------|------|----------|----------|
| United Arab Emirates | 2006 | 0.484336 | 1.642268 |
| United Arab Emirates | 2007 | 0.455707 | 1.872718 |
| United Arab Emirates | 2008 | 0.414353 | 1.915966 |
| United Arab Emirates | 2009 | 0.386944 | 1.959882 |
| United Arab Emirates | 2010 | 0.377203 | 1.975313 |
| United Arab Emirates | 2011 | 0.372044 | 2.007443 |
| United Arab Emirates | 2012 | 0.369703 | 2.035482 |
| United Arab Emirates | 2013 | 0.353789 | 1.824708 |
| United Arab Emirates | 2014 | 0.302003 | 1.068639 |
| United Arab Emirates | 2015 | 0.308823 | 1.083892 |
| United Arab Emirates | 2016 | 0.313736 | 1.095106 |
| United Arab Emirates | 2017 | 0.317355 | 1.102036 |
| United Arab Emirates | 2018 | 0.322685 | 1.113433 |
| United Arab Emirates | 2019 | 0.328024 | 1.123091 |
| United Kingdom       | 1990 | 1.193318 | 0.623683 |
| United Kingdom       | 1991 | 1.185042 | 0.617732 |
| United Kingdom       | 1992 | 1.191903 | 0.620316 |
| United Kingdom       | 1993 | 1.18015  | 0.616627 |
| United Kingdom       | 1994 | 1.184645 | 0.623098 |
| United Kingdom       | 1995 | 1.165368 | 0.618961 |
| United Kingdom       | 1996 | 1.162815 | 0.622685 |
| United Kingdom       | 1997 | 1.162376 | 0.626324 |
| United Kingdom       | 1998 | 1.151615 | 0.626223 |
| United Kingdom       | 1999 | 1.132918 | 0.618551 |
| United Kingdom       | 2000 | 1.133772 | 0.621896 |

|                             |      |          |          |
|-----------------------------|------|----------|----------|
| United Kingdom              | 2001 | 1.125533 | 0.620902 |
| United Kingdom              | 2002 | 1.116016 | 0.619005 |
| United Kingdom              | 2003 | 1.130571 | 0.631655 |
| United Kingdom              | 2004 | 1.141036 | 0.64618  |
| United Kingdom              | 2005 | 1.149652 | 0.659761 |
| United Kingdom              | 2006 | 1.140951 | 0.661428 |
| United Kingdom              | 2007 | 1.151446 | 0.673374 |
| United Kingdom              | 2008 | 1.158662 | 0.683882 |
| United Kingdom              | 2009 | 1.170397 | 0.694055 |
| United Kingdom              | 2010 | 1.196585 | 0.709307 |
| United Kingdom              | 2011 | 1.225876 | 0.723568 |
| United Kingdom              | 2012 | 1.252109 | 0.736999 |
| United Kingdom              | 2013 | 1.261349 | 0.746707 |
| United Kingdom              | 2014 | 1.272174 | 0.763126 |
| United Kingdom              | 2015 | 1.2565   | 0.769459 |
| United Kingdom              | 2016 | 1.240504 | 0.775236 |
| United Kingdom              | 2017 | 1.21352  | 0.77185  |
| United Kingdom              | 2018 | 1.186146 | 0.766796 |
| United Kingdom              | 2019 | 1.164712 | 0.764333 |
| United Republic of Tanzania | 1990 | 0.781522 | 0.703391 |
| United Republic of Tanzania | 1991 | 0.770668 | 0.692076 |
| United Republic of Tanzania | 1992 | 0.762312 | 0.682524 |
| United Republic of Tanzania | 1993 | 0.757432 | 0.675606 |
| United Republic of Tanzania | 1994 | 0.754777 | 0.669585 |
| United Republic of Tanzania | 1995 | 0.754556 | 0.665336 |

|                             |      |          |          |
|-----------------------------|------|----------|----------|
| United Republic of Tanzania | 1996 | 0.753179 | 0.660656 |
| United Republic of Tanzania | 1997 | 0.755772 | 0.65939  |
| United Republic of Tanzania | 1998 | 0.762045 | 0.661406 |
| United Republic of Tanzania | 1999 | 0.758868 | 0.656168 |
| United Republic of Tanzania | 2000 | 0.75477  | 0.650069 |
| United Republic of Tanzania | 2001 | 0.761333 | 0.652433 |
| United Republic of Tanzania | 2002 | 0.775263 | 0.660039 |
| United Republic of Tanzania | 2003 | 0.799231 | 0.675537 |
| United Republic of Tanzania | 2004 | 0.817084 | 0.687831 |
| United Republic of Tanzania | 2005 | 0.833331 | 0.699574 |
| United Republic of Tanzania | 2006 | 0.849816 | 0.70961  |
| United Republic of Tanzania | 2007 | 0.863137 | 0.718822 |
| United Republic of Tanzania | 2008 | 0.871853 | 0.726302 |
| United Republic of Tanzania | 2009 | 0.88892  | 0.738823 |
| United Republic of Tanzania | 2010 | 0.911233 | 0.758888 |
| United Republic of Tanzania | 2011 | 0.934464 | 0.780506 |
| United Republic of Tanzania | 2012 | 0.944435 | 0.790545 |
| United Republic of Tanzania | 2013 | 0.95813  | 0.803793 |
| United Republic of Tanzania | 2014 | 0.961943 | 0.812238 |
| United Republic of Tanzania | 2015 | 0.967976 | 0.817986 |
| United Republic of Tanzania | 2016 | 0.970737 | 0.825863 |
| United Republic of Tanzania | 2017 | 0.976471 | 0.836559 |
| United Republic of Tanzania | 2018 | 0.97822  | 0.842363 |
| United Republic of Tanzania | 2019 | 0.979223 | 0.848354 |
| United States of America    | 1990 | 1.121959 | 0.673713 |

|                          |      |          |          |
|--------------------------|------|----------|----------|
| United States of America | 1991 | 1.121152 | 0.673792 |
| United States of America | 1992 | 1.118823 | 0.672728 |
| United States of America | 1993 | 1.117914 | 0.672485 |
| United States of America | 1994 | 1.127135 | 0.678043 |
| United States of America | 1995 | 1.130951 | 0.681682 |
| United States of America | 1996 | 1.147801 | 0.692919 |
| United States of America | 1997 | 1.160897 | 0.703666 |
| United States of America | 1998 | 1.167934 | 0.711278 |
| United States of America | 1999 | 1.175995 | 0.721325 |
| United States of America | 2000 | 1.185469 | 0.731829 |
| United States of America | 2001 | 1.184596 | 0.736947 |
| United States of America | 2002 | 1.166022 | 0.730166 |
| United States of America | 2003 | 1.156228 | 0.729609 |
| United States of America | 2004 | 1.162079 | 0.737919 |
| United States of America | 2005 | 1.161446 | 0.741989 |
| United States of America | 2006 | 1.170441 | 0.752624 |
| United States of America | 2007 | 1.176848 | 0.761583 |
| United States of America | 2008 | 1.157902 | 0.754912 |
| United States of America | 2009 | 1.137414 | 0.747998 |
| United States of America | 2010 | 1.112516 | 0.737069 |
| United States of America | 2011 | 1.100105 | 0.735527 |
| United States of America | 2012 | 1.079197 | 0.728297 |
| United States of America | 2013 | 1.052712 | 0.717797 |
| United States of America | 2014 | 1.045775 | 0.71982  |
| United States of America | 2015 | 1.036761 | 0.720233 |



|                              |      |          |          |
|------------------------------|------|----------|----------|
| United States of America     | 2016 | 1.018288 | 0.714376 |
| United States of America     | 2017 | 0.997852 | 0.705882 |
| United States of America     | 2018 | 0.970738 | 0.689814 |
| United States of America     | 2019 | 0.99178  | 0.704414 |
| United States Virgin Islands | 1990 | 0.873088 | 0.721712 |
| United States Virgin Islands | 1991 | 0.874237 | 0.725185 |
| United States Virgin Islands | 1992 | 0.870862 | 0.721844 |
| United States Virgin Islands | 1993 | 0.870139 | 0.720392 |
| United States Virgin Islands | 1994 | 0.875963 | 0.723101 |
| United States Virgin Islands | 1995 | 0.910227 | 0.749649 |
| United States Virgin Islands | 1996 | 0.91449  | 0.749982 |
| United States Virgin Islands | 1997 | 0.925431 | 0.756183 |
| United States Virgin Islands | 1998 | 0.934782 | 0.760012 |
| United States Virgin Islands | 1999 | 0.930633 | 0.751762 |
| United States Virgin Islands | 2000 | 0.956607 | 0.762725 |
| United States Virgin Islands | 2001 | 0.955895 | 0.760227 |
| United States Virgin Islands | 2002 | 0.959703 | 0.761204 |
| United States Virgin Islands | 2003 | 0.960362 | 0.761988 |
| United States Virgin Islands | 2004 | 0.96685  | 0.766782 |
| United States Virgin Islands | 2005 | 0.964826 | 0.766372 |
| United States Virgin Islands | 2006 | 0.926507 | 0.744328 |
| United States Virgin Islands | 2007 | 0.733662 | 0.621569 |
| United States Virgin Islands | 2008 | 0.734813 | 0.619853 |
| United States Virgin Islands | 2009 | 0.740848 | 0.622809 |
| United States Virgin Islands | 2010 | 0.746643 | 0.624255 |

|                              |      |          |          |
|------------------------------|------|----------|----------|
| United States Virgin Islands | 2011 | 0.748312 | 0.62212  |
| United States Virgin Islands | 2012 | 0.74953  | 0.619269 |
| United States Virgin Islands | 2013 | 0.748915 | 0.614179 |
| United States Virgin Islands | 2014 | 0.746855 | 0.60744  |
| United States Virgin Islands | 2015 | 0.742282 | 0.598189 |
| United States Virgin Islands | 2016 | 0.742383 | 0.591309 |
| United States Virgin Islands | 2017 | 0.750479 | 0.590251 |
| United States Virgin Islands | 2018 | 0.761021 | 0.590597 |
| United States Virgin Islands | 2019 | 0.771097 | 0.590125 |
| Uruguay                      | 1990 | 0.787892 | 0.531212 |
| Uruguay                      | 1991 | 0.815435 | 0.545513 |
| Uruguay                      | 1992 | 0.792603 | 0.529812 |
| Uruguay                      | 1993 | 0.792372 | 0.527085 |
| Uruguay                      | 1994 | 0.782112 | 0.517604 |
| Uruguay                      | 1995 | 0.776781 | 0.509406 |
| Uruguay                      | 1996 | 0.77837  | 0.508201 |
| Uruguay                      | 1997 | 0.800527 | 0.519526 |
| Uruguay                      | 1998 | 0.786886 | 0.508517 |
| Uruguay                      | 1999 | 0.810708 | 0.520204 |
| Uruguay                      | 2000 | 0.821543 | 0.525213 |
| Uruguay                      | 2001 | 0.846287 | 0.538567 |
| Uruguay                      | 2002 | 0.836056 | 0.528477 |
| Uruguay                      | 2003 | 0.864479 | 0.540434 |
| Uruguay                      | 2004 | 0.894154 | 0.553194 |
| Uruguay                      | 2005 | 0.908873 | 0.560506 |

|            |      |          |          |
|------------|------|----------|----------|
| Uruguay    | 2006 | 0.913924 | 0.560684 |
| Uruguay    | 2007 | 0.904512 | 0.551885 |
| Uruguay    | 2008 | 0.924715 | 0.562482 |
| Uruguay    | 2009 | 0.912966 | 0.55148  |
| Uruguay    | 2010 | 0.93959  | 0.561935 |
| Uruguay    | 2011 | 0.962523 | 0.566127 |
| Uruguay    | 2012 | 0.976484 | 0.571097 |
| Uruguay    | 2013 | 0.988945 | 0.57691  |
| Uruguay    | 2014 | 0.996598 | 0.579124 |
| Uruguay    | 2015 | 1.013463 | 0.586803 |
| Uruguay    | 2016 | 1.039523 | 0.59868  |
| Uruguay    | 2017 | 1.031497 | 0.593876 |
| Uruguay    | 2018 | 1.024607 | 0.589103 |
| Uruguay    | 2019 | 1.020814 | 0.586969 |
| Uzbekistan | 1990 | 1.053712 | 0.850642 |
| Uzbekistan | 1991 | 1.058001 | 0.854141 |
| Uzbekistan | 1992 | 1.078785 | 0.8679   |
| Uzbekistan | 1993 | 1.066371 | 0.853702 |
| Uzbekistan | 1994 | 1.030576 | 0.826133 |
| Uzbekistan | 1995 | 0.981071 | 0.793016 |
| Uzbekistan | 1996 | 0.943412 | 0.769216 |
| Uzbekistan | 1997 | 0.952693 | 0.779594 |
| Uzbekistan | 1998 | 0.966792 | 0.790835 |
| Uzbekistan | 1999 | 0.943803 | 0.773295 |
| Uzbekistan | 2000 | 0.917629 | 0.749618 |

|            |      |          |          |
|------------|------|----------|----------|
| Uzbekistan | 2001 | 0.899862 | 0.73214  |
| Uzbekistan | 2002 | 0.894435 | 0.723247 |
| Uzbekistan | 2003 | 0.892522 | 0.716783 |
| Uzbekistan | 2004 | 0.89648  | 0.716733 |
| Uzbekistan | 2005 | 0.897849 | 0.728357 |
| Uzbekistan | 2006 | 0.887354 | 0.723319 |
| Uzbekistan | 2007 | 0.879009 | 0.725456 |
| Uzbekistan | 2008 | 0.868701 | 0.718806 |
| Uzbekistan | 2009 | 0.865821 | 0.718362 |
| Uzbekistan | 2010 | 0.876619 | 0.731268 |
| Uzbekistan | 2011 | 0.865302 | 0.727632 |
| Uzbekistan | 2012 | 0.862568 | 0.731741 |
| Uzbekistan | 2013 | 0.856119 | 0.730918 |
| Uzbekistan | 2014 | 0.845965 | 0.724626 |
| Uzbekistan | 2015 | 0.845181 | 0.726931 |
| Uzbekistan | 2016 | 0.839304 | 0.728291 |
| Uzbekistan | 2017 | 0.838265 | 0.723642 |
| Uzbekistan | 2018 | 0.835082 | 0.719203 |
| Uzbekistan | 2019 | 0.831718 | 0.71384  |
| Vanuatu    | 1990 | 0.924689 | 1.062804 |
| Vanuatu    | 1991 | 0.959062 | 1.090159 |
| Vanuatu    | 1992 | 0.992102 | 1.11732  |
| Vanuatu    | 1993 | 1.015954 | 1.136811 |
| Vanuatu    | 1994 | 1.050027 | 1.165347 |
| Vanuatu    | 1995 | 1.057606 | 1.170658 |

|                                    |      |          |          |
|------------------------------------|------|----------|----------|
| Vanuatu                            | 1996 | 1.075089 | 1.181653 |
| Vanuatu                            | 1997 | 1.081546 | 1.182417 |
| Vanuatu                            | 1998 | 1.087602 | 1.181903 |
| Vanuatu                            | 1999 | 1.083482 | 1.169205 |
| Vanuatu                            | 2000 | 1.055304 | 1.134576 |
| Vanuatu                            | 2001 | 1.03525  | 1.103403 |
| Vanuatu                            | 2002 | 0.979033 | 1.042508 |
| Vanuatu                            | 2003 | 0.939    | 0.996405 |
| Vanuatu                            | 2004 | 0.932133 | 0.979734 |
| Vanuatu                            | 2005 | 0.931551 | 0.967699 |
| Vanuatu                            | 2006 | 0.933997 | 0.962733 |
| Vanuatu                            | 2007 | 0.937084 | 0.957964 |
| Vanuatu                            | 2008 | 0.939521 | 0.955358 |
| Vanuatu                            | 2009 | 0.939143 | 0.952518 |
| Vanuatu                            | 2010 | 0.938401 | 0.95149  |
| Vanuatu                            | 2011 | 0.947135 | 0.960747 |
| Vanuatu                            | 2012 | 0.945052 | 0.960552 |
| Vanuatu                            | 2013 | 0.941907 | 0.960476 |
| Vanuatu                            | 2014 | 0.930911 | 0.952544 |
| Vanuatu                            | 2015 | 0.923052 | 0.947129 |
| Vanuatu                            | 2016 | 0.912979 | 0.93965  |
| Vanuatu                            | 2017 | 0.911947 | 0.940753 |
| Vanuatu                            | 2018 | 0.909456 | 0.940258 |
| Vanuatu                            | 2019 | 0.90635  | 0.939138 |
| Venezuela (Bolivarian Republic of) | 1990 | 0.816605 | 0.702689 |

|                                    |      |          |          |
|------------------------------------|------|----------|----------|
| Venezuela (Bolivarian Republic of) | 1991 | 0.804698 | 0.693203 |
| Venezuela (Bolivarian Republic of) | 1992 | 0.798843 | 0.686705 |
| Venezuela (Bolivarian Republic of) | 1993 | 0.757611 | 0.641868 |
| Venezuela (Bolivarian Republic of) | 1994 | 0.773954 | 0.64284  |
| Venezuela (Bolivarian Republic of) | 1995 | 0.78569  | 0.650344 |
| Venezuela (Bolivarian Republic of) | 1996 | 0.827465 | 0.689124 |
| Venezuela (Bolivarian Republic of) | 1997 | 0.859391 | 0.715852 |
| Venezuela (Bolivarian Republic of) | 1998 | 0.810625 | 0.676084 |
| Venezuela (Bolivarian Republic of) | 1999 | 0.831487 | 0.694345 |
| Venezuela (Bolivarian Republic of) | 2000 | 0.803139 | 0.671118 |
| Venezuela (Bolivarian Republic of) | 2001 | 0.799291 | 0.667806 |
| Venezuela (Bolivarian Republic of) | 2002 | 0.827619 | 0.684559 |
| Venezuela (Bolivarian Republic of) | 2003 | 0.765497 | 0.632291 |
| Venezuela (Bolivarian Republic of) | 2004 | 0.775109 | 0.637159 |
| Venezuela (Bolivarian Republic of) | 2005 | 0.759502 | 0.621158 |
| Venezuela (Bolivarian Republic of) | 2006 | 0.708105 | 0.576335 |
| Venezuela (Bolivarian Republic of) | 2007 | 0.670884 | 0.544186 |
| Venezuela (Bolivarian Republic of) | 2008 | 0.667097 | 0.540119 |
| Venezuela (Bolivarian Republic of) | 2009 | 0.678994 | 0.548394 |
| Venezuela (Bolivarian Republic of) | 2010 | 0.768656 | 0.622094 |
| Venezuela (Bolivarian Republic of) | 2011 | 0.78214  | 0.635776 |
| Venezuela (Bolivarian Republic of) | 2012 | 0.752834 | 0.615282 |
| Venezuela (Bolivarian Republic of) | 2013 | 0.769992 | 0.630856 |
| Venezuela (Bolivarian Republic of) | 2014 | 0.884428 | 0.726306 |
| Venezuela (Bolivarian Republic of) | 2015 | 0.880047 | 0.72823  |

|                                    |      |          |          |
|------------------------------------|------|----------|----------|
| Venezuela (Bolivarian Republic of) | 2016 | 0.860449 | 0.71614  |
| Venezuela (Bolivarian Republic of) | 2017 | 0.828765 | 0.692569 |
| Venezuela (Bolivarian Republic of) | 2018 | 0.805853 | 0.675996 |
| Venezuela (Bolivarian Republic of) | 2019 | 0.785368 | 0.659536 |
| Viet Nam                           | 1990 | 1.930348 | 1.258255 |
| Viet Nam                           | 1991 | 1.895754 | 1.240529 |
| Viet Nam                           | 1992 | 1.868496 | 1.226206 |
| Viet Nam                           | 1993 | 1.841509 | 1.210638 |
| Viet Nam                           | 1994 | 1.813586 | 1.193323 |
| Viet Nam                           | 1995 | 1.782829 | 1.172882 |
| Viet Nam                           | 1996 | 1.743699 | 1.147006 |
| Viet Nam                           | 1997 | 1.709193 | 1.122924 |
| Viet Nam                           | 1998 | 1.672772 | 1.096766 |
| Viet Nam                           | 1999 | 1.63651  | 1.070041 |
| Viet Nam                           | 2000 | 1.579058 | 1.030261 |
| Viet Nam                           | 2001 | 1.521513 | 0.993379 |
| Viet Nam                           | 2002 | 1.47358  | 0.962    |
| Viet Nam                           | 2003 | 1.431813 | 0.932566 |
| Viet Nam                           | 2004 | 1.392316 | 0.903543 |
| Viet Nam                           | 2005 | 1.353006 | 0.874162 |
| Viet Nam                           | 2006 | 1.337065 | 0.859607 |
| Viet Nam                           | 2007 | 1.324604 | 0.850056 |
| Viet Nam                           | 2008 | 1.323289 | 0.849737 |
| Viet Nam                           | 2009 | 1.321261 | 0.852674 |
| Viet Nam                           | 2010 | 1.328771 | 0.860246 |

|          |      |          |          |
|----------|------|----------|----------|
| Viet Nam | 2011 | 1.341013 | 0.87573  |
| Viet Nam | 2012 | 1.354551 | 0.89126  |
| Viet Nam | 2013 | 1.369053 | 0.906847 |
| Viet Nam | 2014 | 1.387531 | 0.923227 |
| Viet Nam | 2015 | 1.409908 | 0.938181 |
| Viet Nam | 2016 | 1.431575 | 0.953848 |
| Viet Nam | 2017 | 1.459148 | 0.972659 |
| Viet Nam | 2018 | 1.486234 | 0.990891 |
| Viet Nam | 2019 | 1.508687 | 1.006537 |
| Yemen    | 1990 | 0.981841 | 0.746822 |
| Yemen    | 1991 | 0.968788 | 0.745728 |
| Yemen    | 1992 | 0.950842 | 0.740663 |
| Yemen    | 1993 | 0.932491 | 0.735044 |
| Yemen    | 1994 | 0.913991 | 0.729153 |
| Yemen    | 1995 | 0.904266 | 0.730324 |
| Yemen    | 1996 | 0.896218 | 0.731679 |
| Yemen    | 1997 | 0.882889 | 0.728787 |
| Yemen    | 1998 | 0.870341 | 0.726354 |
| Yemen    | 1999 | 0.857908 | 0.723453 |
| Yemen    | 2000 | 0.847074 | 0.721681 |
| Yemen    | 2001 | 0.837908 | 0.720832 |
| Yemen    | 2002 | 0.832844 | 0.720939 |
| Yemen    | 2003 | 0.82958  | 0.723923 |
| Yemen    | 2004 | 0.828547 | 0.727283 |
| Yemen    | 2005 | 0.830121 | 0.733911 |



|        |      |          |          |
|--------|------|----------|----------|
| Yemen  | 2006 | 0.829255 | 0.735995 |
| Yemen  | 2007 | 0.83175  | 0.740204 |
| Yemen  | 2008 | 0.832213 | 0.742458 |
| Yemen  | 2009 | 0.832872 | 0.745576 |
| Yemen  | 2010 | 0.835204 | 0.752401 |
| Yemen  | 2011 | 0.845055 | 0.763452 |
| Yemen  | 2012 | 0.853337 | 0.773794 |
| Yemen  | 2013 | 0.862728 | 0.784063 |
| Yemen  | 2014 | 0.869438 | 0.792211 |
| Yemen  | 2015 | 0.873679 | 0.798236 |
| Yemen  | 2016 | 0.879447 | 0.80375  |
| Yemen  | 2017 | 0.885689 | 0.808814 |
| Yemen  | 2018 | 0.891526 | 0.812253 |
| Yemen  | 2019 | 0.897097 | 0.814499 |
| Zambia | 1990 | 0.874025 | 0.844793 |
| Zambia | 1991 | 0.860211 | 0.835418 |
| Zambia | 1992 | 0.844285 | 0.825868 |
| Zambia | 1993 | 0.821036 | 0.808517 |
| Zambia | 1994 | 0.809962 | 0.801534 |
| Zambia | 1995 | 0.79626  | 0.791593 |
| Zambia | 1996 | 0.782948 | 0.782316 |
| Zambia | 1997 | 0.766796 | 0.76913  |
| Zambia | 1998 | 0.750685 | 0.754682 |
| Zambia | 1999 | 0.732818 | 0.737519 |
| Zambia | 2000 | 0.707935 | 0.712561 |

|          |      |          |          |
|----------|------|----------|----------|
| Zambia   | 2001 | 0.693031 | 0.695964 |
| Zambia   | 2002 | 0.677749 | 0.678508 |
| Zambia   | 2003 | 0.667889 | 0.664051 |
| Zambia   | 2004 | 0.659869 | 0.648766 |
| Zambia   | 2005 | 0.655895 | 0.638442 |
| Zambia   | 2006 | 0.660793 | 0.637345 |
| Zambia   | 2007 | 0.659858 | 0.631617 |
| Zambia   | 2008 | 0.660439 | 0.627202 |
| Zambia   | 2009 | 0.667305 | 0.629889 |
| Zambia   | 2010 | 0.679315 | 0.637493 |
| Zambia   | 2011 | 0.69254  | 0.647015 |
| Zambia   | 2012 | 0.707016 | 0.658908 |
| Zambia   | 2013 | 0.720994 | 0.669655 |
| Zambia   | 2014 | 0.729531 | 0.67707  |
| Zambia   | 2015 | 0.735597 | 0.683088 |
| Zambia   | 2016 | 0.741109 | 0.689189 |
| Zambia   | 2017 | 0.749312 | 0.697265 |
| Zambia   | 2018 | 0.752969 | 0.70141  |
| Zambia   | 2019 | 0.759635 | 0.707038 |
| Zimbabwe | 1990 | 0.661655 | 0.555791 |
| Zimbabwe | 1991 | 0.640232 | 0.541326 |
| Zimbabwe | 1992 | 0.610999 | 0.522021 |
| Zimbabwe | 1993 | 0.567077 | 0.49111  |
| Zimbabwe | 1994 | 0.515934 | 0.449828 |
| Zimbabwe | 1995 | 0.461896 | 0.404784 |

|          |      |          |          |
|----------|------|----------|----------|
| Zimbabwe | 1996 | 0.418462 | 0.364105 |
| Zimbabwe | 1997 | 0.392742 | 0.335841 |
| Zimbabwe | 1998 | 0.414159 | 0.346022 |
| Zimbabwe | 1999 | 0.449094 | 0.366171 |
| Zimbabwe | 2000 | 0.487121 | 0.389527 |
| Zimbabwe | 2001 | 0.512585 | 0.40252  |
| Zimbabwe | 2002 | 0.54821  | 0.423934 |
| Zimbabwe | 2003 | 0.584949 | 0.445465 |
| Zimbabwe | 2004 | 0.618119 | 0.464381 |
| Zimbabwe | 2005 | 0.616168 | 0.459484 |
| Zimbabwe | 2006 | 0.640547 | 0.473186 |
| Zimbabwe | 2007 | 0.658688 | 0.483898 |
| Zimbabwe | 2008 | 0.694945 | 0.507221 |
| Zimbabwe | 2009 | 0.7293   | 0.52948  |
| Zimbabwe | 2010 | 0.733864 | 0.532571 |
| Zimbabwe | 2011 | 0.724001 | 0.525821 |
| Zimbabwe | 2012 | 0.727939 | 0.527944 |
| Zimbabwe | 2013 | 0.739323 | 0.534652 |
| Zimbabwe | 2014 | 0.759521 | 0.547145 |
| Zimbabwe | 2015 | 0.758458 | 0.546135 |
| Zimbabwe | 2016 | 0.756162 | 0.544612 |
| Zimbabwe | 2017 | 0.757829 | 0.544924 |
| Zimbabwe | 2018 | 0.757228 | 0.54387  |
| Zimbabwe | 2019 | 0.757349 | 0.543382 |
